# Supplementary material for: Unveiling protist diversity associated with the Pacific oyster Crassostrea gigas using blocking and excluding primers
Source: BMC Microbiol. 2020 Jul 3;20:193. doi: 10.1186/s12866-020-01860-1 (PMC7333408; doi:10.1186/s12866-020-01860-1)
Supplement: Supplementary file 3 — Additional file 3: Table S2. Number of sequences. Values correspond to 18SV1V2EX/18SV4BP. [file 12866_2020_1860_MOESM3_ESM.xls]

## Sheet: Table S2
Table S2. Number of sequences. Values correspond to 18SV1V2EX/18SV4BP.
Sample	Other name	Total number of raw sequences	Total number of cleaned sequences	Number of oyster sequences	Number of Embryophyceae sequences	Number of protist sequences
O1.S1.R01	CF09-C-R05	78455/76790	67229/62161	0/46778	10/0	67217/15380
O1.S1.R02	CF09-C-R07	59345/79212	48942/63922	168/59920	9/0	43299/3971
O1.S1.R03	CF09-C-R08	40746/57419	34312/46613	0/44496	42009	34302/2112
O1.S1.R04	CF09-C-R10	105920/65793	90720/54595	0/41980	42008	90711/12605
O1.S1.R05	CF09-C-R11	25379/66421	21544/48892	0/42724	42005	21540/6163
O1.S1.R06	CF09-C-R13	23483/86351	20024/69118	0/65469	1/0	20021/3649
O1.S2.R01	AF09-N-R06	131407/15324	106189/11556	0/7774	1473/2	104712/3767
O1.S2.R02	AF09-N-R10	79939/68820	66686/52737	0/39753	1641/18	64192/12740
O1.S2.R03	AF09-N-R12	70246/54825	57742/44052	0/40506	5777/7	51962/3480
O1.S3.R01	AF09-I-R02	50739/57073	42618/45613	0/45123	6/0	42609/456
O1.S3.R02	AF09-I-R10	38608/63961	30596/49628	0/49003	232/0	30362/400
O1.S3.R03	AF09-I-R13	19558/62465	14824/50161	0/47318	47/1	14720/2637
O2.S1.R01	CF15-C-R06	16226/51845	13535/42539	0/39342	3300/1	10234/3174
O2.S1.R02	CF15-C-R08	92550/58644	80622/48268	0/34091	42017	80604/14162
O2.S1.R03	CF15-C-R09	39190/49986	32789/39654	0/36386	42035	32786/3252
O2.S1.R04	CF15-C-R14	51442/59286	43799/49374	0/37594	1724/24	42073/11753
O2.S2.R01	AF15-N-R05	49517/69517	41289/58463	0/53816	10/0	41278/4632
O2.S2.R02	AF15-N-R06	49390/64272	41608/50118	0/27823	699/7	40909/22223
O2.S2.R03	AF15-N-R09	71452/73038	57378/61033	0/55505	2998/42	54376/5419
O2.S3.R01	AF15-I-R01	76443/63475	62607/52142	0/46026	3189/1	59418/5375
O2.S3.R02	AF15-I-R09	25824/69836	21453/43854	2/42282	695/1	20753/1008
O2.S3.R03	AF15-I-R10	42073/64664	32500/53166	0/47445	48/0	31041/2001
O3.S1.R01	CF21-C-R03	57101/47451	49833/39175	0/31781	4/0	49825/7379
O3.S1.R02	CF21-C-R08	62976/74697	53639/58800	0/48106	8/0	53625/10690
O3.S1.R03	CF21-C-R13	40987/45952	35116/37280	0/33212	42019	35098/4041
O3.S1.R04	CF21-C-R14	56874/52001	48037/42113	0/35149	42011	48028/6820
O3.S2.R01	AF21-N-R06	75030/54203	61633/41992	3/26148	286/1	61328/12201
O3.S2.R02	AF21-N-R14	70281/57146	58994/47479	0/42283	3370/15	55623/5160
O3.S3.R01	AF21-I-R03	17683/75427	14001/62953	0/62330	48/1	12492/501
O3.S3.R02	AF21-I-R09	29746/65469	22234/53294	0/50348	42197	22195/2531
O4.S1.R01	CF32-C-R02	26741/50073	23056/41388	0/37945	18/30	23036/3412
O4.S1.R02	CF32-C-R07	32853/63916	26340/50813	0/44803	158/15	26181/5887
O4.S1.R03	CF32-C-R08	27733/47761	22628/34997	0/32318	5/0	22622/2673
O4.S1.R04	CF32-C-R11	80444/64097	68324/52254	0/39839	249/17	68073/12371
O4.S1.R05	CF32-C-R14	82016/62043	67769/49744	0/35304	764/0	67002/14335
O4.S2.R01	AF32-N-R04	96250/52930	80254/42025	1/30489	1048/9	79201/11471
O4.S2.R02	AF32-N-R05	95095/60531	80338/46988	1/40220	2117/12	78218/6647
O4.S2.R03	AF32-N-R07	70081/63356	56440/51865	0/42466	291/4	56145/9183
O4.S3.R01	AF32-I-R06	59373/58260	49204/39434	0/31454	160/2	48932/5464
O4.S3.R02	AF32-I-R07	87995/54895	68793/43005	0/32295	184/0	68523/7204
O4.S3.R03	AF32-I-R14	94559/55999	73953/41443	0/39285	20/0	73673/2103
O5.S1.R01	CF44-C-R03	25547/56424	19753/45855	0/39443	861/2	18891/6409
O5.S1.R02	CF44-C-R05	84414/73640	72663/58365	0/41421	171/5	72488/16830
O5.S1.R03	CF44-C-R06	66386/79721	57685/64227	0/39963	42134	57670/24226
O5.S1.R04	CF44-C-R07	63825/77544	54433/63485	0/48986	139/0	54204/14492
O5.S1.R05	CF44-C-R08	49904/40946	43553/31542	0/24902	3608/42	39945/6504
O5.S1.R06	CF44-C-R09	75653/61029	63704/49009	71/40186	99/1	63532/8795
O5.S1.R07	CF44-C-R11	61439/59078	52672/47473	0/36313	10/0	52658/11157
O5.S2.R01	AF44-N-R05	95528/52926	78452/42219	0/25379	460/1	77987/16736
O5.S2.R02	AF44-N-R07	108966/58595	90489/47922	11/26975	689/8	89702/20782
O5.S2.R03	AF44-N-R10	60511/69071	52034/56647	0/49981	53/0	51977/6556
O5.S3.R01	AF44-I-R05	75451/61735	61125/45728	0/37801	5/0	61103/5430
O5.S3.R02	AF44-I-R11	52823/63138	42433/51488	0/49817	3/0	42425/1529
O5.S3.R03	AF44-I-R12	85210/62432	68003/48955	0/34025	1557/18	66376/11530
