# Supplementary material for: Unveiling protist diversity associated with the Pacific oyster Crassostrea gigas using blocking and excluding primers
Source: BMC Microbiol. 2020 Jul 3;20:193. doi: 10.1186/s12866-020-01860-1 (PMC7333408; doi:10.1186/s12866-020-01860-1)
Supplement: Supplementary file 5 — Additional file 5: Table S3. OTU annotations and abundances for 18SV1V2EX samples. [file 12866_2020_1860_MOESM5_ESM.xls]

## Sheet: Table S3
Table S3. OTU annotations and abundances for 18SV1V2EX samples.
OTU	kingdom	phylum	division	class	order	family	genus	species	O1.S2.R02	O1.S1.R01	O1.S1.R04	O1.S1.R05	O2.S3.R01	O2.S2.R02	O2.S2.R03	O2.S1.R02	O2.S1.R04	O3.S2.R01	O3.S2.R02	O3.S1.R01	O3.S1.R02	O3.S1.R04	O4.S3.R01	O4.S3.R02	O4.S2.R01	O4.S2.R02	O4.S2.R03	O4.S1.R02	O4.S1.R04	O4.S1.R05	O5.S3.R01	O5.S3.R03	O5.S2.R01	O5.S2.R02	O5.S2.R03	O5.S1.R01	O5.S1.R02	O5.S1.R03	O5.S1.R04	O5.S1.R05	O5.S1.R06	O5.S1.R07
OTU_2	Eukaryota	Alveolata	Dinophyta	Dinophyceae	Suessiales	Suessiales_X	Multi-affiliation	Multi-affiliation	25178	31453	23602	13714	6	23718	8911	49149	21577	32852	22788	10734	19599	8693	28	17	18822	5809	11542	11760	23079	15161	5	3	32868	42975	25997	6603	15494	26076	32423	17568	30681	12584
OTU_3	Eukaryota	Alveolata	Ciliophora	Spirotrichea	Choreotrichia	Dictyocystidae	Codonellopsis	Codonellopsis_nipponica	2262	1	0	0	1	9680	35999	0	1	2545	21154	1	1	0	68	0	48582	44817	36597	0	1	0	0	1	1619	25881	324	1	1	1	20	2	0	1
OTU_4	Eukaryota	Stramenopiles	Ochrophyta	Bacillariophyta	Bacillariophyta_X	Polar-centric-Mediophyceae	Multi-affiliation	Multi-affiliation	2173	1	0	1	10975	6	217	1	1	167	3	1	0	0	23630	41707	10	88	0	0	0	0	13494	32974	1366	1084	431	0	1	0	2	2	24	4
OTU_5	Eukaryota	Alveolata	Ciliophora	Oligohymenophorea	Mobilida	Trichodinidae	Trichodina	Trichodina_sinonovaculae	7279	1	45987	3	116	0	1381	1	3	0	75	19382	9304	29070	239	2111	2	0	159	2	3	0	6	2	7750	1178	0	0	0	1	2	0	45	14234
OTU_6	Eukaryota	Alveolata	Dinophyta	Dinophyceae	Suessiales	Suessiales_X	Suessiales_XX	Suessiales_XX_sp.	1232	9634	5191	310	0	560	5	3851	2816	1896	174	738	4710	2966	26	0	1287	454	2	862	8240	3508	0	13	908	1501	166	3537	6737	5549	4086	3625	8936	8236
OTU_7	Eukaryota	Alveolata	Dinophyta	Dinophyceae	Dinophyceae_X	Dinophyceae_XX	Dinophyceae_XXX	Dinophyceae_XXX_sp.	0	3441	2892	2258	1	0	0	3552	6289	1	0	2545	3371	1433	0	0	1	0	0	4009	4370	1456	0	1	0	861	4	1500	9049	8618	7525	3310	3595	3704
OTU_8	Eukaryota	Alveolata	Dinophyta	Dinophyceae	Dinophyceae_X	Dinophyceae_XX	Multi-affiliation	Multi-affiliation	3617	0	597	0	4761	1634	1824	0	0	1450	3323	0	1	0	1596	1074	4170	8745	2272	0	1	264	117	335	3194	774	4764	0	356	708	0	5	0	385
OTU_9	Eukaryota	Archaeplastida	Chlorophyta	Multi-affiliation	Multi-affiliation	Multi-affiliation	Multi-affiliation	Multi-affiliation	2540	1	60	69	12145	36	1	5	7	2498	106	9	0	0	4910	6463	177	196	87	0	0	0	8949	10413	2562	1325	154	1	0	0	1	18	0	98
OTU_10	Eukaryota	Alveolata	Dinophyta	Dinophyceae	Suessiales	Suessiales_X	Polarella	Polarella_glacialis	1	262	1789	216	0	0	0	2090	7001	0	0	1419	1718	812	0	1	0	1	0	163	4447	1860	0	0	0	2	0	1068	8369	4366	49	2214	3817	985
OTU_11	Eukaryota	Multi-affiliation	Multi-affiliation	Multi-affiliation	Multi-affiliation	Multi-affiliation	Multi-affiliation	Multi-affiliation	10	325	2617	837	0	0	0	931	160	2	0	2285	1943	233	0	0	1	0	49	2963	4123	782	1	0	179	110	76	226	777	3611	558	1792	963	630
OTU_12	Eukaryota	Alveolata	Dinophyta	Dinophyceae	Dinophyceae_X	Dinophyceae_XX	Protoperidinium	Protoperidinium_bipes	3086	35	2	0	0	379	130	348	0	2814	226	0	14	463	0	0	1087	2624	27	2398	6	134	0	0	8802	1219	10999	1746	33	14	133	189	1743	41
OTU_13	Eukaryota	Opisthokonta	Mesomycetozoa	Ichthyosporea	Ichthyosphonida	Pseudoperkinsidae	Anurofeca	Anurofeca_richardsi	0	0	0	0	0	0	0	0	0	0	1	0	0	0	0	0	0	0	0	0	0	0	0	0	0	0	0	0	0	0	0	0	0	0
OTU_14	Eukaryota	Alveolata	Dinophyta	Dinophyceae	Dinophyceae_X	Pfiesteriaceae	Multi-affiliation	Multi-affiliation	209	721	2785	651	254	189	197	135	26	4767	50	469	677	191	88	192	0	667	53	32	1204	761	23	709	49	465	17	968	3520	1505	196	503	2843	4329
OTU_15	Eukaryota	Multi-affiliation	Multi-affiliation	Multi-affiliation	Multi-affiliation	Multi-affiliation	Multi-affiliation	Multi-affiliation	522	1164	5	11	0	1	11	228	62	79	40	15	0	1	0	1	173	388	4	18	5	0	0	0	110	765	285	589	22	188	237	419	20	0
OTU_16	Eukaryota	Alveolata	Ciliophora	Oligohymenophorea	Sessilida	Vorticellidae	Vorticellidae_X	Vorticellidae_X_sp.	0	0	0	0	0	0	0	0	0	0	0	0	0	0	1	0	0	0	0	0	0	0	0	0	0	0	0	0	0	0	0	0	0	0
OTU_17	Eukaryota	Alveolata	Ciliophora	Oligohymenophorea	Peritrichia	Zoothamniidae	Zoothamnium	Zoothamnium_pelagicum	0	68	0	0	1	0	0	9442	0	0	0	2464	470	0	0	0	0	0	0	0	0	1375	0	0	0	0	0	0	6258	0	0	66	0	0
OTU_18	Eukaryota	Alveolata	Dinophyta	Dinophyceae	Dinophyceae_X	Pfiesteriaceae	Pfiesteriaceae_X	Pfiesteriaceae_X_sp.	0	2714	1171	959	0	0	0	1550	368	0	1	1408	3300	2308	0	0	0	0	0	77	2149	1162	1	0	1	1	0	92	3312	2249	2065	489	2034	2100
OTU_19	Eukaryota	Alveolata	Ciliophora	Oligohymenophorea	Tetrahymenida	Tetrahymenidae	Tetrahymena	Multi-affiliation	0	0	0	0	0	0	0	1	0	0	0	1	0	0	0	0	0	0	0	0	1	0	0	0	0	0	0	0	0	0	0	0	0	0
OTU_21	Eukaryota	Alveolata	Dinophyta	Dinophyceae	Dinophyceae_X	Dinophyceae_XX	Dinophyceae_XXX	Dinophyceae_XXX_sp.	0	0	1	0	1911	0	0	0	0	0	0	0	0	0	2870	4757	0	2	31	0	1	0	747	2696	0	0	0	0	1	0	1	0	1	0
OTU_22	Eukaryota	Amoebozoa	Lobosa	Discosea-Flabellinia	Dactylopodida	Paramoebidae	Neoparamoeba	Neoparamoeba_pemaquidensis	0	0	0	0	0	0	0	1	1	0	0	0	0	1	0	0	1	2	6	85	9282	30160	0	0	1	0	0	1	1	0	1	0	0	0
OTU_23	Eukaryota	Alveolata	Ciliophora	Spirotrichea	Choreotrichia	Tintinnidae	Tintinnopsis	Tintinnopsis_sp.	183	0	0	0	0	1211	824	0	0	1058	675	0	0	0	1	0	1107	3775	875	0	0	0	0	0	50	788	826	0	0	0	0	0	0	0
OTU_24	Eukaryota	Alveolata	Dinophyta	Dinophyceae	Dinophyceae_X	Dinophyceae_XX	Scrippsiella	Scrippsiella_trochoidea	235	49	0	0	5808	36	2	0	0	493	22	0	1	0	957	1082	401	238	108	0	0	0	132	229	210	410	6	0	0	0	0	23	0	0
OTU_25	Eukaryota	Stramenopiles	Ochrophyta	Bacillariophyta	Bacillariophyta_X	Polar-centric-Mediophyceae	Polar-centric-Mediophyceae_X	Polar-centric-Mediophyceae_X_sp.	1577	1	1	0	962	25	7	53	0	1083	597	0	0	0	1562	1429	15	319	178	0	0	46	327	735	851	343	357	0	0	0	0	0	0	0
OTU_26	Eukaryota	Archaeplastida	Chlorophyta	Ulvophyceae	Ulvales-relatives	Ulvales-relatives_X	Ulva	Ulva_compressa	12	0	0	0	2797	0	0	0	0	343	1	0	33	0	47	0	0	0	3	0	0	0	7375	3073	8	0	0	0	5	0	159	0	14	0
OTU_27	Eukaryota	Alveolata	Dinophyta	Dinophyceae	Dinophyceae_X	Dinophyceae_XX	Alexandrium	Multi-affiliation	634	26	0	0	1316	93	759	798	0	8	636	0	13	1	2563	48	101	463	268	0	1327	0	2169	178	5	6	9	0	0	0	1	11	0	0
OTU_31	Eukaryota	Alveolata	Dinophyta	Dinophyceae	Dinophyceae_X	Dinophyceae_XX	Heterocapsa	Multi-affiliation	944	28	914	12	1	91	3	0	0	1944	32	223	78	4	0	0	3	0	498	8	211	0	1	278	373	79	47	192	378	341	2	44	857	967
OTU_32	Eukaryota	Alveolata	Dinophyta	Dinophyceae	Dinophyceae_X	Pfiesteriaceae	Stoeckeria	Stoeckeria_sp.	118	959	15	476	0	0	0	52	0	1	0	13	371	4	0	323	0	0	6	0	149	121	0	0	0	0	0	354	2520	54	562	161	173	335
OTU_34	Eukaryota	Rhizaria	Cercozoa	Filosa-Thecofilosea	Cryomonadida	Protaspa-lineage	Protaspa	Protaspa_longipes	502	0	2	0	2818	2	0	0	0	0	173	0	0	0	1340	1121	4	0	0	0	0	0	1752	780	76	17	75	339	0	0	0	1073	2	0
OTU_35	Eukaryota	Alveolata	Dinophyta	Dinophyceae	Dinophyceae_X	Dinophyceae_XX	Prorocentrum	Prorocentrum_micans	0	0	0	4	2877	0	0	10	0	0	0	7	2	1	778	383	1	0	0	0	0	4	2300	112	314	0	1	85	1795	56	0	0	7	822
OTU_36	Eukaryota	Stramenopiles	Ochrophyta	Bacillariophyta	Bacillariophyta_X	Polar-centric-Mediophyceae	Thalassiosira	Thalassiosira_concaviuscula	586	0	0	0	850	32	0	0	0	13	0	0	0	0	309	1405	0	0	0	0	0	0	102	1982	409	58	20	0	0	0	0	0	2	0
OTU_37	Eukaryota	Hacrobia	Cryptophyta	Cryptophyceae	Cryptophyceae_X	Cryptomonadales	Cryptomonadales_X	Cryptomonadales_X_sp.	0	1	0	0	0	0	0	1	0	0	0	0	0	0	0	0	0	27	0	0	0	0	0	0	0	0	0	0	0	0	0	0	0	17
OTU_38	Eukaryota	Stramenopiles	Ochrophyta	Bacillariophyta	Bacillariophyta_X	Polar-centric-Mediophyceae	Thalassiosira	Multi-affiliation	2681	6	0	0	27	36	1	0	0	859	299	0	0	0	144	0	40	77	41	0	1	0	0	141	4010	602	840	0	0	0	0	0	0	0
OTU_39	Eukaryota	Alveolata	Dinophyta	Dinophyceae	Suessiales	Suessiales_X	Suessiales_XX	Suessiales_XX_sp.	0	2598	46	0	0	0	0	187	0	0	0	12	158	0	0	0	0	0	0	23	2474	10	0	0	73	0	0	6	3	41	0	466	11	79
OTU_40	Eukaryota	Archaeplastida	Chlorophyta	Ulvophyceae	Ulvales-relatives	Ulvales-relatives_X	Dilabifilum	Dilabifilum_sp.	0	0	3	0	528	0	0	15	0	0	0	0	8	0	6	143	0	0	0	0	0	190	459	2482	0	0	0	0	0	0	12	29	68	3
OTU_41	Eukaryota	Alveolata	Ciliophora	Phyllopharyngea	Suctoria	Acinetidae	Acineta	Acineta_tuberosa	0	0	0	0	0	0	9	0	0	1	58	0	0	0	0	0	78	2328	0	0	0	0	5795	169	1	4	37	0	0	0	0	0	0	0
OTU_43	Eukaryota	Archaeplastida	Chlorophyta	Mamiellophyceae	Mamiellales	Mamiellaceae	Micromonas	Micromonas_Clade-B.E.3	0	4	0	0	0	0	0	0	0	0	5	0	0	0	0	0	0	1	0	0	0	0	0	0	0	0	0	0	0	1	0	0	0	0
OTU_44	Eukaryota	Alveolata	Dinophyta	Dinophyceae	Dinophyceae_X	Dinophyceae_XX	Dinophyceae_XXX	Dinophyceae_XXX_sp.	291	5	63	374	0	0	0	0	539	0	36	35	63	220	1	0	0	1	0	8	499	292	1	23	2004	1473	155	46	529	509	257	329	664	1037
OTU_45	Eukaryota	Stramenopiles	Ochrophyta	Bacillariophyta	Bacillariophyta_X	Polar-centric-Mediophyceae	Minidiscus	Multi-affiliation	1301	0	4	0	0	164	1	0	0	1326	270	0	64	2	2	0	12	25	362	0	0	0	42	65	989	1247	956	0	0	0	0	38	0	0
OTU_46	Eukaryota	Alveolata	Ciliophora	Oligohymenophorea	Peritrichia	Zoothamniidae	Zoothamnopsis	Zoothamnopsis_sinica	0	0	0	0	0	0	1	1	2	0	0	2	35	0	463	0	0	0	0	0	302	414	899	12	0	0	0	0	108	0	0	1	1	0
OTU_47	Eukaryota	Hacrobia	Picobiliphyta	Picobiliphyta_X	Picobiliphyta_XX	Picobiliphyta_XXX	Picobiliphyta_XXXX	Multi-affiliation	0	315	0	1	0	0	0	0	143	0	0	0	0	0	0	0	0	0	0	0	0	0	0	0	1	0	0	0	0	0	0	0	0	0
OTU_48	Eukaryota	Hacrobia	Telonemia	Telonemia_X	Telonemia_XX	Telonemia-Group-2	Telonemia-Group-2_X	Telonemia-Group-2_X_sp.	0	1	0	0	0	0	0	1	2	0	0	2	0	1	0	0	0	0	0	0	0	0	0	0	0	0	0	1	6	5	0	436	14	0
OTU_49	Eukaryota	Alveolata	Dinophyta	Syndiniales	Dino-Group-II	Dino-Group-II-Clade-32	Dino-Group-II-Clade-32_X	Multi-affiliation	0	13	14	5	0	752	0	1855	10	0	0	37	267	0	0	0	0	0	0	5	0	0	0	0	0	0	0	0	5	864	199	18	1134	1
OTU_50	Eukaryota	Alveolata	Ciliophora	Oligohymenophorea	Sessilida	Vorticellidae	Vorticella	Vorticella_sp.	0	3207	0	0	0	0	0	0	0	0	0	0	0	0	0	0	0	0	0	0	0	0	0	0	0	0	0	0	0	0	0	0	0	0
OTU_51	Eukaryota	Multi-affiliation	Multi-affiliation	Multi-affiliation	Multi-affiliation	Multi-affiliation	Multi-affiliation	Multi-affiliation	362	0	0	0	0	2	0	0	0	0	0	0	0	0	0	0	1	0	0	0	0	0	0	0	0	0	0	0	0	0	0	0	0	0
OTU_52	Eukaryota	Alveolata	Ciliophora	Oligohymenophorea	Peritrichia	Zoothamniidae	Zoothamnopsis	Zoothamnopsis_sinica	0	0	0	409	0	0	0	0	0	0	0	66	0	0	185	0	0	0	0	0	1	10	2999	2	0	0	0	0	0	0	0	4	0	2
OTU_53	Eukaryota	Alveolata	Ciliophora	Phyllopharyngea	Suctoria	Acinetidae	Acineta	Acineta_sp.	0	6	43	0	0	0	0	0	0	0	0	0	0	0	0	0	0	1	0	0	1	3	0	0	0	0	0	0	56	0	0	14	0	86
OTU_54	Eukaryota	Multi-affiliation	Multi-affiliation	Multi-affiliation	Multi-affiliation	Multi-affiliation	Multi-affiliation	Multi-affiliation	0	0	0	0	0	0	0	0	0	0	0	0	0	0	0	0	0	0	0	0	0	0	1	0	0	0	0	0	1	0	0	0	0	0
OTU_56	Eukaryota	Opisthokonta	Mesomycetozoa	Ichthyosporea	Ichthyosphonida	Abeoformidae_Group_MAIP_2	Abeoformidae_Group_MAIP_2_X	Abeoformidae_Group_MAIP_2_X_sp.	0	5	209	44	22	0	0	6	4	0	0	130	397	15	0	0	0	0	0	31	66	217	0	0	0	0	0	245	419	222	101	638	144	79
OTU_57	Eukaryota	Hacrobia	Telonemia	Telonemia_X	Telonemia_XX	Telonemia-Group-2	Telonema-Group-2	Telonema_antarcticum	1	0	0	0	0	0	0	2	0	0	0	0	0	0	0	0	0	0	0	316	0	2	0	0	0	0	0	0	1	0	0	2	0	828
OTU_58	Eukaryota	Alveolata	Dinophyta	Dinophyceae	Suessiales	Suessiales_X	Multi-affiliation	Multi-affiliation	158	2626	506	25	0	5	0	1087	8	1	5	0	50	80	55	0	4	7	0	0	45	64	0	0	4	14	45	10	502	76	52	192	1666	0
OTU_59	Eukaryota	Rhizaria	Cercozoa	Filosa-Thecofilosea	Cryomonadida	Protaspa-lineage	Protaspa-lineage_X	Protaspa-lineage_X_sp.	1	0	0	0	1742	5	0	0	0	2	30	0	0	0	86	372	0	66	0	0	0	0	51	43	0	10	1516	0	0	1	0	0	0	0
OTU_60	Eukaryota	Rhizaria	Cercozoa	Filosa-Thecofilosea	Cryomonadida	Protaspa-lineage	Protaspa	Protaspa_longipes	17	0	0	0	2223	0	0	0	0	0	0	0	0	0	274	87	84	0	0	0	0	0	575	205	0	0	0	0	0	0	0	0	0	0
OTU_63	Eukaryota	Alveolata	Ciliophora	Oligohymenophorea	Scuticociliatia	Cyclidiidae	Cyclidium	Cyclidium_glaucoma	0	0	0	0	0	0	1	0	0	0	0	0	0	0	0	0	0	0	1	0	0	0	0	0	0	0	0	0	0	0	0	0	0	0
OTU_65	Eukaryota	Stramenopiles	Ochrophyta	Bacillariophyta	Bacillariophyta_X	Polar-centric-Mediophyceae	Thalassiosira	Thalassiosira_oceanica	853	0	0	0	63	24	0	0	0	5	0	0	0	0	0	68	9	1	1	0	0	0	0	369	810	291	959	0	0	0	0	0	0	0
OTU_66	Eukaryota	Stramenopiles	Ochrophyta	Bacillariophyta	Bacillariophyta_X	Raphid-pennate	Hippodonta	Hippodonta_capitata	58	0	0	43	331	20	33	0	2	108	45	0	0	0	520	446	26	6	208	0	0	0	3568	634	292	80	374	0	0	0	0	0	0	0
OTU_67	Eukaryota	Stramenopiles	Stramenopiles_X	Bicoecea	Anoecales	Cafeteriaceae	Cafeteria	Multi-affiliation	0	17	6	0	0	0	0	210	2	0	0	0	0	0	0	0	0	1	0	0	0	54	0	0	1	1	0	9	139	0	0	209	61	0
OTU_68	Eukaryota	Alveolata	Ciliophora	Oligohymenophorea	Peritrichia	Zoothamniidae	Zoothamnopsis	Zoothamnopsis_sinica	0	1468	3	0	0	0	0	0	0	0	0	0	0	0	0	0	0	0	0	0	0	0	0	0	0	0	0	0	0	0	0	1	0	0
OTU_69	Eukaryota	Opisthokonta	Fungi	Basidiomycota	Ustilaginomycotina	Exobasidiomycetes	Exobasidiomycetes_X	Exobasidiomycetes_X_sp.	0	0	0	0	0	0	0	0	0	0	0	0	0	0	0	0	0	0	0	1	0	0	0	0	0	0	0	0	0	0	0	0	0	0
OTU_70	Eukaryota	Alveolata	Dinophyta	Dinophyceae	Dinophyceae_X	Dinophyceae_XX	Multi-affiliation	Multi-affiliation	29	2185	0	0	0	0	0	76	158	300	0	27	481	0	4	4	0	0	6	0	0	14	0	137	4	144	84	1	564	54	0	15	36	3
OTU_71	Eukaryota	Multi-affiliation	Multi-affiliation	Multi-affiliation	Multi-affiliation	Multi-affiliation	Multi-affiliation	Multi-affiliation	595	0	0	0	80	28	175	27	0	295	108	0	0	0	25	342	24	114	56	0	0	0	104	164	422	810	188	0	0	0	0	0	0	0
OTU_72	Eukaryota	Hacrobia	Haptophyta	Prymnesiophyceae	Prymnesiales	Chrysochromulinaceae	Chrysochromulina	Multi-affiliation	0	1	0	0	0	0	0	0	0	0	0	0	0	0	0	0	0	0	0	0	0	347	0	0	0	0	0	0	0	0	0	0	0	0
OTU_73	Eukaryota	Alveolata	Dinophyta	Dinophyceae	Dinophyceae_X	Dinophyceae_XX	Prorocentrum	Multi-affiliation	17	0	0	0	3	0	31	0	0	2200	151	0	0	0	1	17	23	0	3	0	0	0	23	0	925	0	0	0	0	0	0	1	0	1
OTU_74	Eukaryota	Apusozoa	Apusomonadidae	Apusomonadidae_Group-1	Apusomonadidae_Group-1_X	Apusomonadidae_Group-1_XX	Apusomonas	Apusomonas_proboscidea	0	0	0	0	0	0	0	0	0	0	0	0	0	1	1	1	0	0	0	0	0	0	4	0	0	0	0	0	0	0	0	0	0	0
OTU_75	Eukaryota	Alveolata	Dinophyta	Dinophyceae	Suessiales	Suessiales_X	Woloszynskia	Woloszynskia_sp._strain1	0	5	22	0	0	0	0	47	950	0	0	0	14	31	0	1	0	0	3	101	2208	3	0	0	0	0	0	82	87	149	0	0	541	0
OTU_76	Eukaryota	Alveolata	Ciliophora	Oligohymenophorea	Sessilida	Vorticellidae	Carchesium	Carchesium_polypinum	0	0	0	0	0	0	1	0	0	0	0	0	0	5	0	0	0	0	0	16	0	0	0	0	0	0	0	0	0	0	0	4	0	0
OTU_77	Eukaryota	Alveolata	Dinophyta	Dinophyceae	Dinophyceae_X	Dinophyceae_XX	Diplopsalis	Diplopsalis_lenticula	0	0	0	0	678	3	0	0	0	0	0	0	0	0	293	28	12	0	23	0	0	0	909	800	751	0	0	0	1	0	0	0	0	0
OTU_78	Eukaryota	Alveolata	Dinophyta	Syndiniales	Dino-Group-II	Dino-Group-II-Clade-4	Dino-Group-II-Clade-4_X	Dino-Group-II-Clade-4_X_sp.	0	0	0	0	0	0	0	0	0	0	0	0	5	0	206	0	0	0	0	93	0	0	0	0	0	0	0	0	0	0	498	0	0	0
OTU_80	Eukaryota	Multi-affiliation	Multi-affiliation	Multi-affiliation	Multi-affiliation	Multi-affiliation	Multi-affiliation	Multi-affiliation	0	0	3	0	0	0	0	0	0	0	0	0	0	0	0	0	0	0	0	0	0	106	0	0	0	0	0	0	0	0	0	0	0	0
OTU_82	Eukaryota	Opisthokonta	Fungi	Ascomycota	Pezizomycotina	Multi-affiliation	Multi-affiliation	Multi-affiliation	10	0	0	2	320	0	8	0	320	4	660	0	0	0	2	0	0	3	1	0	600	0	0	13	11	2	0	0	214	0	3	152	243	0
OTU_83	Eukaryota	Alveolata	Dinophyta	Syndiniales	Dino-Group-II	Dino-Group-II-Clade-1	Dino-Group-II-Clade-1_X	Dino-Group-II-Clade-1_X_sp.	0	0	0	1	1	0	0	0	0	0	0	0	0	0	0	0	0	0	0	0	0	0	0	0	0	0	0	0	0	0	0	0	0	0
OTU_85	Eukaryota	Alveolata	Dinophyta	Dinophyceae	Multi-affiliation	Multi-affiliation	Multi-affiliation	Multi-affiliation	0	130	0	30	0	0	0	284	722	0	0	0	126	4	0	173	0	0	0	0	0	0	0	0	0	0	0	0	131	0	31	28	54	13
OTU_86	Eukaryota	Alveolata	Ciliophora	Oligohymenophorea	Peritrichia	Zoothamniidae	Zoothamnium	Zoothamnium_sp.	0	0	0	0	0	0	0	1	0	0	0	0	2	0	0	0	0	0	0	0	0	15	0	0	0	0	0	90	0	0	0	31	0	0
OTU_88	Eukaryota	Alveolata	Dinophyta	Syndiniales	Dino-Group-I	Dino-Group-I-Clade-1	Dino-Group-I-Clade-1_X	Dino-Group-I-Clade-1_X_sp.	396	2	0	0	0	0	0	163	0	0	0	0	1	19	0	0	101	0	0	4	0	0	0	0	0	0	0	0	448	250	295	0	184	0
OTU_89	Eukaryota	Stramenopiles	Ochrophyta	Bacillariophyta	Bacillariophyta_X	Polar-centric-Mediophyceae	Skeletonema	Skeletonema_dohrnii	0	0	0	0	7	0	0	0	0	0	0	0	0	0	0	0	0	0	0	0	0	0	0	1	2	0	1	0	0	0	0	0	0	0
OTU_90	Eukaryota	Alveolata	Dinophyta	Dinophyceae	Dinophyceae_X	Dinophyceae_XX	Gymnodinium	Gymnodinium_sp.	0	0	0	0	0	0	0	0	0	0	0	0	0	0	0	0	0	0	0	0	0	0	0	0	0	0	0	2	122	593	179	0	93	0
OTU_91	Eukaryota	Alveolata	Dinophyta	Dinophyceae	Dinophyceae_X	Dinophyceae_XX	Dinophyceae_XXX	Dinophyceae_XXX_sp.	0	32	101	0	0	0	0	1	0	0	0	2	4	127	0	0	0	0	0	0	264	19	0	0	0	0	0	32	557	12	225	437	9	88
OTU_93	Eukaryota	Alveolata	Dinophyta	Dinophyceae	Multi-affiliation	Multi-affiliation	Multi-affiliation	Multi-affiliation	0	5	0	0	0	0	0	1091	0	0	8	0	274	0	0	0	0	0	0	0	0	40	0	0	0	0	0	0	1	452	0	771	25	6
OTU_94	Eukaryota	Alveolata	Dinophyta	Syndiniales	Dino-Group-II	Dino-Group-II-Clade-39	Dino-Group-II-Clade-39_X	Dino-Group-II-Clade-39_X_sp.	0	0	0	0	0	0	0	0	0	0	0	0	40	0	0	0	0	0	0	1880	0	0	0	0	0	0	0	0	0	1	0	0	0	31
OTU_95	Eukaryota	Excavata	Discoba	Euglenozoa	Kinetoplastida	Prokinetoplastidae	PLO	PLO_of	0	0	0	0	0	0	0	0	0	0	0	0	0	0	0	1	0	0	0	0	393	2440	0	0	0	0	0	0	0	0	0	0	0	0
OTU_96	Eukaryota	Rhizaria	Cercozoa	Filosa-Thecofilosea	Ebriida	Botuliformidae	Botuliforma	Botuliforma_benthica	1	1130	6	0	0	0	0	6	0	0	0	0	0	0	0	0	0	0	0	32	8	67	343	0	0	0	0	0	0	10	0	0	286	0
OTU_98	Eukaryota	Alveolata	Dinophyta	Syndiniales	Dino-Group-II	Dino-Group-II_X	Dino-Group-II_XX	Dino-Group-II_XX_sp.	0	0	0	0	0	0	0	0	0	0	0	2598	0	0	0	0	0	0	0	0	0	0	0	0	0	0	0	0	0	1	0	0	0	0
OTU_100	Eukaryota	Opisthokonta	Mesomycetozoa	Ichthyosporea	Ichthyosphonida	Abeoformidae_Group_MAIP_1	Abeoformidae_Group_MAIP_1_X	Abeoformidae_Group_MAIP_1_X_sp.	60	0	16	0	47	4	0	15	0	7	11	0	22	35	135	28	0	129	4	17	34	10	0	0	23	0	0	0	1083	0	42	56	6	2
OTU_102	Eukaryota	Hacrobia	Cryptophyta	Cryptophyceae	Cryptophyceae_X	Cryptomonadales	Multi-affiliation	Multi-affiliation	0	0	0	0	0	0	0	0	0	0	0	0	0	0	0	0	0	0	0	0	0	0	0	0	0	0	0	0	987	0	0	0	0	0
OTU_103	Eukaryota	Alveolata	Ciliophora	Oligohymenophorea	Peritrichia	Zoothamniidae	Planeticovorticella	Planeticovorticella_sp.	0	0	0	0	0	0	0	0	0	0	0	2280	1	0	0	0	0	0	0	0	0	0	0	0	0	0	0	0	0	0	0	0	0	0
OTU_104	Eukaryota	Stramenopiles	Ochrophyta	Bacillariophyta	Bacillariophyta_X	Polar-centric-Mediophyceae	Thalassiosira	Thalassiosira_pseudonana	34	0	3	0	0	185	2	0	0	18	640	0	0	0	0	575	1	156	11	0	0	0	0	4	0	26	316	0	0	0	0	0	0	0
OTU_105	Eukaryota	Alveolata	Dinophyta	Syndiniales	Dino-Group-II	Dino-Group-II-Clade-32	Dino-Group-II-Clade-32_X	Multi-affiliation	0	0	0	0	0	0	0	0	0	0	0	0	0	0	0	0	0	0	0	2	0	0	0	0	0	0	0	0	10	2	139	0	0	0
OTU_108	Eukaryota	Archaeplastida	Chlorophyta	Chlorophyceae	Chlamydomonadales	Chlamydomonadales_X	Chlamydomonas	Chlamydomonas_parkeae	201	0	0	0	0	7	0	0	1	0	5	0	0	0	0	0	0	0	5	0	0	0	0	0	193	130	0	0	0	0	0	0	0	0
OTU_110	Eukaryota	Archaeplastida	Chlorophyta	Mamiellophyceae	Mamiellales	Mamiellaceae	Mantoniella	Mantoniella_squamata	0	0	0	0	0	0	0	0	0	0	0	0	0	0	0	0	0	0	0	0	0	0	0	0	0	0	1	0	0	0	0	0	0	0
OTU_111	Eukaryota	Multi-affiliation	Multi-affiliation	Multi-affiliation	Multi-affiliation	Multi-affiliation	Multi-affiliation	Multi-affiliation	0	0	0	0	0	0	0	0	0	0	0	2191	0	0	0	0	0	0	0	0	0	0	0	0	0	0	0	0	0	0	0	0	0	0
OTU_112	Eukaryota	Hacrobia	Haptophyta	Prymnesiophyceae	Syracosphaerales	Syracosphaeraceae	Syracosphaera	Syracosphaera_pulchra	0	0	1	1	0	0	0	0	0	0	0	0	0	0	0	0	0	0	0	0	0	0	0	0	1	0	0	0	0	0	0	2	0	0
OTU_113	Eukaryota	Opisthokonta	Fungi	Basidiomycota	Agaricomycotina	Tremellomycetes	Multi-affiliation	Multi-affiliation	1	0	545	0	0	0	0	0	0	0	0	0	0	196	0	0	0	0	92	0	0	2	36	532	0	0	0	0	0	0	4	75	0	0
OTU_114	Eukaryota	Rhizaria	Cercozoa	Filosa-Thecofilosea	Cryomonadida	Protaspa-lineage	Protaspa-lineage_X	Protaspa-lineage_X_sp.	0	267	0	0	12	0	0	0	0	0	0	0	7	0	9	23	0	0	0	0	0	0	1	398	0	0	0	0	0	0	0	0	0	0
OTU_115	Eukaryota	Stramenopiles	Stramenopiles_X	MAST	MAST-12	MAST-12D	MAST-12D_X	MAST-12D_X_sp.	174	0	0	0	127	0	0	0	0	6	5	0	0	0	0	1	13	8	0	0	1	0	30	2	0	0	15	0	0	0	0	0	0	0
OTU_116	Eukaryota	Hacrobia	Cryptophyta	Cryptophyceae	Cryptophyceae_X	Cryptomonadales	Multi-affiliation	Multi-affiliation	0	0	0	0	0	0	0	0	0	0	0	0	0	4	0	0	0	21	0	0	0	0	0	0	0	40	0	0	0	0	0	0	0	0
OTU_119	Eukaryota	Alveolata	Apicomplexa	Apicomplexa_X	Gregarines	Gregarines_X	Gregarinidae	Gregarinidae_sp.	33	0	0	0	0	0	0	1	0	0	0	0	0	0	0	0	0	0	0	0	0	0	100	0	0	0	0	0	1556	0	0	0	0	0
OTU_120	Eukaryota	Opisthokonta	Fungi	Basidiomycota	Agaricomycotina	Agaricomycetes	Agaricomycetes_X	Agaricomycetes_X_sp.	1	0	0	0	0	0	0	0	0	8	0	0	1	0	59	0	0	0	0	0	0	0	0	40	4	0	0	0	847	0	3	0	0	0
OTU_121	Eukaryota	Alveolata	Dinophyta	Dinophyceae	Dinophyceae_X	Dinophyceae_XX	Dinophyceae_XXX	Dinophyceae_XXX_sp.	1	0	0	0	0	75	0	0	0	0	0	0	0	0	0	0	0	0	0	0	0	0	0	0	1019	870	0	0	0	0	0	0	0	0
OTU_122	Eukaryota	Opisthokonta	Fungi	Basidiomycota	Pucciniomycotina	Cystobasidiomycetes	Rhodotorula	Rhodotorula_minuta	1	0	0	0	0	0	1	0	0	0	0	0	0	0	0	0	0	0	0	0	0	0	0	83	0	0	0	0	0	0	0	0	0	0
OTU_123	Eukaryota	Opisthokonta	Fungi	Ascomycota	Saccharomycotina	Saccharomycetales	Multi-affiliation	Multi-affiliation	0	0	0	0	1242	0	2	0	0	0	0	0	0	0	0	1	0	0	0	0	0	0	0	0	0	0	0	0	0	0	0	0	0	17
OTU_124	Eukaryota	Stramenopiles	Ochrophyta	Bacillariophyta	Bacillariophyta_X	Raphid-pennate	Cocconeis	Multi-affiliation	0	0	0	0	0	0	0	0	0	0	0	0	0	0	0	0	0	0	0	0	0	0	3	0	1	0	0	0	0	0	0	0	0	0
OTU_125	Eukaryota	Alveolata	Dinophyta	Dinophyceae	Dinophyceae_X	Dinophyceae_XX	Heterocapsa	Heterocapsa_triquetra	196	0	0	0	0	65	173	0	0	32	31	0	0	0	0	0	6	323	352	0	0	0	0	0	548	5	4	0	0	0	0	0	0	0
OTU_126	Eukaryota	Stramenopiles	Ochrophyta	Bacillariophyta	Bacillariophyta_X	Polar-centric-Mediophyceae	Multi-affiliation	Multi-affiliation	0	0	0	0	12	0	0	0	0	0	0	0	0	0	25	1068	0	0	0	0	0	0	0	108	0	0	0	0	0	0	0	0	0	0
OTU_127	Eukaryota	Alveolata	Dinophyta	Dinophyceae	Dinophyceae_X	Dinophyceae_XX	Dinophyceae_XXX	Dinophyceae_XXX_sp.	0	0	0	0	0	0	0	0	0	0	0	0	0	0	0	0	0	0	0	0	0	0	0	0	0	0	0	0	0	0	0	12	0	0
OTU_128	Eukaryota	Alveolata	Dinophyta	Dinophyceae	Dinophyceae_X	Dinophyceae_XX	Archaeperidinium	Archaeperidinium_minutum	60	0	0	0	0	8	1268	0	0	0	207	0	0	0	0	0	0	0	11	0	0	0	0	0	0	33	0	0	0	0	3	0	0	0
OTU_129	Eukaryota	Alveolata	Dinophyta	Syndiniales	Dino-Group-II	Dino-Group-II-Clade-16	Dino-Group-II-Clade-16_X	Dino-Group-II-Clade-16_X_sp.	0	0	75	0	0	0	0	1	0	0	0	4	12	0	0	0	0	0	0	62	0	9	0	0	0	0	0	9	0	0	0	287	1262	0
OTU_131	Eukaryota	Alveolata	Dinophyta	Syndiniales	Dino-Group-II	Dino-Group-II-Clade-33	Dino-Group-II-Clade-33_X	Dino-Group-II-Clade-33_X_sp._strain2	0	0	0	0	0	0	0	0	0	0	0	0	10	0	0	0	0	0	0	0	0	101	0	0	0	0	0	0	0	0	0	1406	0	0
OTU_133	Eukaryota	Alveolata	Dinophyta	Dinophyceae	Multi-affiliation	Multi-affiliation	Multi-affiliation	Multi-affiliation	0	0	0	1	0	0	0	0	0	0	0	0	0	0	0	0	0	0	0	0	0	0	0	3	8	19	3	0	0	0	0	38	0	0
OTU_135	Eukaryota	Opisthokonta	Mesomycetozoa	Ichthyosporea	Ichthyosphonida	Pseudoperkinsidae	Multi-affiliation	Multi-affiliation	28	0	0	0	44	211	59	0	0	2	42	0	0	0	18	191	27	75	7	0	0	0	373	6	1	37	0	0	0	0	0	0	0	0
OTU_137	Eukaryota	Opisthokonta	Fungi	Basidiomycota	Agaricomycotina	Agaricomycetes	Baeospora	Baeospora_myosura	0	0	0	0	0	0	0	0	0	0	0	0	0	0	0	0	0	0	0	4	0	0	0	0	0	0	0	0	0	0	1640	0	0	0
OTU_138	Eukaryota	Alveolata	Ciliophora	Oligohymenophorea	Sessilida	Vorticellidae	Pseudovorticella	Pseudovorticella_punctata	97	0	0	0	0	0	0	0	0	0	0	0	1270	0	0	0	0	0	0	0	3	0	99	2	0	0	0	0	2	0	0	0	0	0
OTU_140	Eukaryota	Archaeplastida	Chlorophyta	Chlorophyceae	Sphaeropleales	Sphaeropleales_X	Tetranephris	Tetranephris_brasiliensis	0	0	0	0	817	0	0	0	0	0	0	0	0	0	0	0	0	0	0	0	0	0	4	14	0	0	0	0	0	0	0	0	0	0
OTU_141	Eukaryota	Opisthokonta	Fungi	Multi-affiliation	Multi-affiliation	Multi-affiliation	Multi-affiliation	Multi-affiliation	5	0	0	0	158	0	0	0	0	0	0	0	0	0	1	0	0	370	0	0	0	0	465	37	0	12	0	0	55	0	0	0	0	0
OTU_143	Eukaryota	Alveolata	Ciliophora	Oligohymenophorea	Sessilida	Vorticellidae	Vorticella	Vorticella_sp.	0	162	0	0	0	0	0	2	0	0	0	0	0	3	0	0	0	0	0	0	0	9	0	0	0	0	0	0	197	0	0	0	0	0
OTU_144	Eukaryota	Opisthokonta	Fungi	Ascomycota	Taphrinomycotina	Neolectomycetes	Neolecta	Neolecta_irregularis	0	0	0	0	0	0	0	2	0	0	0	0	0	0	1	0	0	0	0	0	0	0	9	5	0	0	0	0	0	0	0	0	0	0
OTU_145	Eukaryota	Alveolata	Dinophyta	Dinophyceae	Dinophyceae_X	Dinophyceae_XX	Multi-affiliation	Multi-affiliation	0	0	0	0	0	0	0	0	0	114	440	0	0	0	0	5	0	0	0	0	0	0	0	0	0	2	0	0	0	0	0	0	0	0
OTU_146	Eukaryota	Archaeplastida	Chlorophyta	Pyramimonadales	Pyramimonadales_X	Pyramimonadales_XX	Pyramimonas	Pyramimonas_aurea	0	0	0	0	0	0	0	0	0	1	0	1	0	0	0	0	0	0	0	0	0	0	0	0	0	25	0	0	0	0	0	0	0	0
OTU_148	Eukaryota	Alveolata	Dinophyta	Dinophyceae	Dinophyceae_X	Dinophyceae_XX	Pentapharsodinium	Pentapharsodinium_tyrrhenicum	17	0	0	0	0	0	686	0	1	0	3	0	0	0	0	0	304	10	39	0	295	0	0	0	1	16	1	0	0	8	0	0	0	0
OTU_150	Eukaryota	Rhizaria	Cercozoa	Filosa-Thecofilosea	Cryomonadida	Protaspa-lineage	Protaspa	Protaspa_obliqua	0	0	463	0	10	0	0	0	92	18	0	37	14	0	72	2	0	0	49	0	2	0	18	7	29	0	1	0	0	2	84	2	8	1
OTU_152	Eukaryota	Archaeplastida	Chlorophyta	Ulvophyceae	Ulvales-relatives	Ulvales-relatives_X	Halochlorococcum	Halochlorococcum_moorei	0	0	0	0	593	0	0	0	0	0	0	0	34	0	0	0	0	0	0	0	162	0	68	114	0	0	0	0	0	0	0	0	102	0
OTU_155	Eukaryota	Alveolata	Dinophyta	Dinophyceae	Suessiales	Suessiales_X	Suessiales_XX	Suessiales_XX_sp.	0	0	73	27	0	0	0	351	0	0	0	0	95	2	0	0	0	0	0	0	0	0	0	0	1	0	0	73	1	129	0	1	149	0
OTU_156	Eukaryota	Opisthokonta	Mesomycetozoa	Ichthyosporea	Ichthyosphonida	Abeoformidae_Group_MAIP_2	Abeoformidae_Group_MAIP_2_X	Abeoformidae_Group_MAIP_2_X_sp.	0	0	0	0	0	0	0	0	0	1	0	0	0	0	0	0	0	1308	0	0	0	0	0	0	0	1	0	0	0	0	0	0	0	0
OTU_157	Eukaryota	Alveolata	Ciliophora	Oligohymenophorea	Sessilida	Vorticellidae	Vorticella	Vorticella_sp.	0	0	0	0	0	0	0	0	0	0	0	0	0	0	0	0	0	0	0	0	0	0	23	0	0	0	0	0	0	0	0	0	0	0
OTU_158	Eukaryota	Alveolata	Dinophyta	Dinophyceae	Dinophyceae_X	Dinophyceae_XX	Dinophyceae_XXX	Dinophyceae_XXX_sp.	127	0	0	0	409	0	0	0	0	0	24	0	0	0	100	0	6	0	0	0	0	0	0	467	0	0	0	0	0	0	0	0	0	0
OTU_160	Eukaryota	Alveolata	Dinophyta	Dinophyceae	Dinophyceae_X	Dinophyceae_XX	Dinophyceae_XXX	Dinophyceae_XXX_sp.	0	0	13	0	0	0	0	0	0	0	0	0	1083	0	0	0	0	0	0	0	4	3	0	0	0	0	0	0	0	1	41	53	0	0
OTU_161	Eukaryota	Amoebozoa	Lobosa	Discosea-Flabellinia	Dactylopodida	Paramoebidae	Neoparamoeba	Neoparamoeba_pemaquidensis	0	0	0	0	0	0	0	0	0	0	0	0	0	0	0	0	0	0	0	0	13	1237	0	0	0	0	0	0	0	0	0	0	0	0
OTU_162	Eukaryota	Alveolata	Dinophyta	Dinophyceae	Suessiales	Suessiales_X	Multi-affiliation	Multi-affiliation	153	0	0	0	0	0	0	0	0	0	24	0	0	0	0	0	0	0	0	0	113	0	0	0	5	16	13	0	0	0	0	238	0	0
OTU_163	Eukaryota	Rhizaria	Cercozoa	Filosa-Granofilosea	Filosa-Granofilosea_X	Massiteriidae	Multi-affiliation	Multi-affiliation	0	4	0	0	0	0	0	969	0	0	0	0	0	0	0	0	0	0	0	0	0	0	0	0	0	0	0	0	0	0	0	0	0	0
OTU_164	Eukaryota	Rhizaria	Cercozoa	Filosa-Thecofilosea	Cryomonadida	Protaspa-lineage	Protaspa-lineage_X	Protaspa-lineage_X_sp.	17	0	0	0	2	0	0	0	0	0	0	18	0	0	3	492	0	0	37	0	0	0	0	0	30	0	0	0	0	0	0	0	0	0
OTU_165	Eukaryota	Alveolata	Dinophyta	Dinophyceae	Suessiales	Suessiales_X	Multi-affiliation	Multi-affiliation	35	46	29	11	0	40	16	74	19	35	32	15	26	7	0	0	47	5	11	11	31	35	0	0	53	46	29	3	12	38	42	27	39	11
OTU_166	Eukaryota	Stramenopiles	Stramenopiles_X	MAST	MAST-3	MAST-3J	MAST-3J_X	MAST-3J_X_sp.	0	0	0	0	0	0	0	0	0	0	0	0	0	0	0	0	0	0	0	0	0	0	0	0	0	0	0	0	0	0	0	4	0	0
OTU_167	Eukaryota	Alveolata	Dinophyta	Dinophyceae	Dinophyceae_X	Dinophyceae_XX	Multi-affiliation	Multi-affiliation	14	0	10	0	0	4	0	0	0	0	70	0	1028	0	0	0	0	0	1	0	0	0	0	0	0	0	3	0	0	0	0	0	0	0
OTU_168	Eukaryota	Stramenopiles	Stramenopiles_X	Labyrinthulea	Labyrinthulales	Labyrinthulaceae	Labyrinthulaceae_X	Labyrinthulaceae_X_sp.	0	0	0	1	0	0	0	0	14	0	0	68	0	63	0	0	0	0	0	30	5	635	0	0	0	0	0	0	0	4	0	0	0	0
OTU_170	Eukaryota	Alveolata	Ciliophora	Oligohymenophorea	Sessilida	Vorticellidae	Multi-affiliation	Multi-affiliation	0	0	0	0	0	0	0	0	0	15	762	2	0	0	0	0	0	0	0	0	3	0	0	0	0	0	0	0	0	0	0	0	0	0
OTU_171	Eukaryota	Stramenopiles	Ochrophyta	Chrysophyceae	Chrysophyceae_X	Chrysophyceae_Clade-C	Chrysophyceae_Clade-C_X	Chrysophyceae_Clade-C_X_sp.	0	0	0	0	24	0	0	0	0	0	0	0	0	0	0	0	0	0	0	0	0	0	0	0	0	0	0	0	0	0	0	0	0	0
OTU_172	Eukaryota	Stramenopiles	Stramenopiles_X	Bicoecea	Anoecales	Cafeteriaceae	Pseudobodo	Pseudobodo_tremulans	0	150	0	0	0	0	0	0	0	0	0	0	0	0	0	0	0	0	0	0	0	0	0	0	0	0	0	0	0	0	0	0	0	0
OTU_173	Eukaryota	Archaeplastida	Chlorophyta	Ulvophyceae	Ulvales-relatives	Ulvales-relatives_X	Acrochaete	Acrochaete_viridis	0	0	0	0	0	0	0	0	0	0	0	0	0	0	0	0	0	1064	0	0	0	0	0	0	0	0	0	0	0	0	0	0	0	0
OTU_174	Eukaryota	Stramenopiles	Ochrophyta	Bacillariophyta	Bacillariophyta_X	Polar-centric-Mediophyceae	Thalassiosira	Thalassiosira_delicatula	0	0	0	0	0	0	0	0	0	0	0	0	0	0	36	19	0	0	0	0	0	0	0	67	48	0	0	0	0	0	0	0	0	0
OTU_175	Eukaryota	Alveolata	Apicomplexa	Apicomplexa_X	Gregarines	Gregarines_X	Gregarinidae	Gregarinidae_sp.	0	0	0	14	0	0	0	0	0	0	0	0	0	1	0	0	0	0	0	73	0	0	0	0	0	0	0	0	0	0	130	0	0	0
OTU_176	Eukaryota	Alveolata	Dinophyta	Dinophyceae	Dinophyceae_X	Dinophyceae_XX	Dinophyceae_XXX	Dinophyceae_XXX_sp.	0	0	68	0	0	0	0	0	21	0	0	158	0	0	0	0	0	0	0	1	41	4	0	0	0	0	0	19	0	214	12	9	22	44
OTU_177	Eukaryota	Alveolata	Dinophyta	Syndiniales	Dino-Group-II	Dino-Group-II-Clade-39	Dino-Group-II-Clade-39_X	Dino-Group-II-Clade-39_X_sp.	0	39	0	623	0	0	0	0	0	0	0	0	4	0	0	0	0	0	0	0	0	0	0	0	0	0	0	0	0	0	0	193	0	0
OTU_178	Eukaryota	Alveolata	Apicomplexa	Apicomplexa_X	Gregarines	Gregarines_X	Gregarines_XX	Gregarines_XX_sp.	0	0	0	0	0	0	0	0	0	0	0	0	0	0	1451	0	0	0	0	0	0	0	0	0	0	38	0	0	0	0	0	0	0	0
OTU_179	Eukaryota	Stramenopiles	Ochrophyta	Chrysophyceae	Chrysophyceae_X	Chrysophyceae_Clade-F	Paraphysomonas	Multi-affiliation	0	0	0	0	0	0	0	0	0	0	0	0	0	0	0	0	0	0	0	0	6	472	0	0	0	0	0	0	0	0	0	0	0	0
OTU_181	Eukaryota	Archaeplastida	Chlorophyta	Ulvophyceae	Ulotrichales	Ulotrichales_X	Hazenia	Multi-affiliation	0	0	0	0	0	0	0	0	0	0	0	0	0	0	0	29	0	0	0	0	0	0	0	5	0	0	0	0	0	0	0	0	0	0
OTU_182	Eukaryota	Rhizaria	Cercozoa	Filosa-Thecofilosea	Cryomonadida	Cryomonadida_X	Cryomonadida_XX	Cryomonadida_XX_sp.	79	0	0	0	0	0	0	3	0	4	8	0	0	2	0	0	5	0	0	0	0	0	0	0	553	12	4	0	0	0	0	0	0	0
OTU_183	Eukaryota	Alveolata	Apicomplexa	Apicomplexa_X	Gregarines	Gregarines_X	Gregarines_XX	Gregarines_XX_sp.	0	0	0	0	0	0	0	0	0	0	0	0	0	0	0	0	0	1044	0	0	0	0	0	0	0	0	0	0	0	0	0	0	0	0
OTU_184	Eukaryota	Rhizaria	Cercozoa	Filosa-Thecofilosea	Cryomonadida	Protaspa-lineage	Protaspa-lineage_X	Protaspa-lineage_X_sp.	0	16	0	0	0	0	0	3	45	0	0	0	0	0	0	0	0	0	0	337	15	27	0	0	0	0	0	0	0	63	0	9	0	0
OTU_186	Eukaryota	Alveolata	Ciliophora	Oligohymenophorea	Peritrichia	Zoothamniidae	Zoothamnium	Zoothamnium_arbuscula	0	0	0	0	0	0	0	0	0	0	0	0	3	0	0	0	0	0	0	0	0	0	0	0	0	0	0	0	0	0	0	0	0	0
OTU_188	Eukaryota	Alveolata	Ciliophora	Spirotrichea	Hypotrichia	Hypotrichia_X	Hypotrichia_XX	Hypotrichia_XX_sp.	0	0	0	0	0	0	0	0	0	0	0	0	0	0	0	0	0	0	0	0	0	0	522	0	0	0	0	0	0	0	0	0	0	0
OTU_189	Eukaryota	Opisthokonta	Fungi	Basidiomycota	Agaricomycotina	Agaricomycetes	Ganoderma	Ganoderma_tsugae	0	17	0	0	0	0	0	0	0	0	0	0	0	0	0	0	0	0	0	0	0	0	0	0	0	0	0	0	606	0	0	0	0	0
OTU_190	Eukaryota	Stramenopiles	Ochrophyta	Bacillariophyta	Bacillariophyta_X	Raphid-pennate	Multi-affiliation	Multi-affiliation	0	0	0	0	0	0	0	0	0	0	0	0	0	0	0	0	0	0	0	0	0	0	121	35	509	160	0	0	0	0	0	0	0	0
OTU_191	Eukaryota	Alveolata	Ciliophora	Oligohymenophorea	Scuticociliatia	Multi-affiliation	Multi-affiliation	Multi-affiliation	0	0	0	0	3	0	0	0	0	0	0	0	0	0	0	0	0	0	0	0	0	0	0	0	0	2	0	0	0	0	0	0	0	0
OTU_192	Eukaryota	Stramenopiles	Stramenopiles_X	Oomycota	Oomycota_X	Leptomitales	Leptomitales_X	Leptomitales_X_sp.	0	0	0	0	0	0	0	0	0	0	0	0	0	0	0	941	0	0	0	0	0	0	0	0	0	0	0	0	0	0	0	0	0	0
OTU_193	Eukaryota	Archaeplastida	Chlorophyta	Ulvophyceae	Oltmansiellopsidales	Oltmansiellopsidales_X	Dangemannia	Dangemannia_microcystis	1	4	0	0	0	0	0	844	0	0	0	0	0	0	0	0	0	0	0	0	0	0	0	0	0	0	0	0	0	0	0	0	0	60
OTU_194	Eukaryota	Archaeplastida	Chlorophyta	Trebouxiophyceae	Chlorellales	Chlorellales_X	Multi-affiliation	Multi-affiliation	0	0	0	0	31	0	0	0	0	0	0	0	0	0	150	0	0	0	0	0	0	0	0	675	0	0	0	0	0	0	0	0	0	0
OTU_195	Eukaryota	Alveolata	Dinophyta	Dinophyceae	Dinophyceae_X	Dinophyceae_XX	Diplopsalis	Diplopsalis_lenticula	0	0	0	0	0	0	0	0	0	0	0	0	0	0	0	0	0	0	0	0	0	0	0	916	0	0	0	0	0	0	0	0	0	0
OTU_197	Eukaryota	Alveolata	Dinophyta	Dinophyceae	Dinophyceae_X	Dinophyceae_XX	Thecate	Thecate_sp.	152	0	0	0	0	0	0	0	0	0	23	0	0	0	69	0	0	0	0	0	0	0	0	0	0	4	0	0	0	0	0	0	0	0
OTU_198	Eukaryota	Stramenopiles	Stramenopiles_X	Bicoecea	Borokales	Borokaceae	Borokaceae_X	Borokaceae_X_sp.	0	449	0	0	0	0	0	0	0	0	0	0	0	0	0	0	0	0	0	0	91	0	0	0	0	0	0	0	0	0	0	0	0	0
OTU_199	Eukaryota	Opisthokonta	Fungi	Ascomycota	Saccharomycotina	Saccharomycetales	Saccharomyces	Saccharomyces_cerevisiae	0	0	0	0	0	0	0	0	0	0	0	0	0	0	8	0	0	0	0	6	0	0	0	0	0	4	5	0	8	0	56	216	1	0
OTU_200	Eukaryota	Rhizaria	Cercozoa	Filosa-Imbricatea	Filosa-Imbricatea_X	Filosa-Imbricatea_XX	Filosa-Imbricatea_XXX	Filosa-Imbricatea_XXX_sp.	0	0	0	0	0	0	11	0	0	0	0	0	0	0	0	0	357	342	40	0	0	9	0	0	0	0	0	0	0	0	0	0	0	0
OTU_201	Eukaryota	Stramenopiles	Ochrophyta	Bacillariophyta	Bacillariophyta_X	Raphid-pennate	Raphid-pennate_X	Raphid-pennate_X_sp.	0	0	0	0	0	0	0	0	0	0	0	0	0	0	834	0	0	0	0	0	0	0	0	0	0	0	0	0	0	0	0	0	0	0
OTU_202	Eukaryota	Rhizaria	Cercozoa	Filosa-Imbricatea	Euglyphida	Paulinellidae	Paulinella	Paulinella_sp.	102	0	0	0	0	2	0	0	0	42	0	0	0	0	0	0	0	0	0	0	0	0	0	1	0	0	0	0	0	0	0	0	0	0
OTU_205	Eukaryota	Rhizaria	Cercozoa	Filosa-Thecofilosea	Cryomonadida	Protaspa-lineage	Protaspa-lineage_X	Protaspa-lineage_X_sp.	0	0	2	0	0	0	0	0	0	0	0	0	0	0	0	0	0	0	0	314	2	0	0	0	0	0	0	0	0	0	0	0	0	0
OTU_206	Eukaryota	Stramenopiles	Stramenopiles_X	Oomycota	Oomycota_X	Olpidophydiales	Olpidiopsis	Olpidiopsis_sp.	0	0	0	0	0	0	0	0	0	0	0	0	0	0	0	0	0	0	0	0	0	0	0	336	0	0	0	0	0	0	0	0	0	0
OTU_207	Eukaryota	Archaeplastida	Chlorophyta	Pyramimonadales	Pyramimonadales_X	Pyramimonadales_XX	Pyramimonas	Pyramimonas_disomata	0	5	0	1	0	0	0	504	0	0	0	0	17	0	0	0	0	0	0	0	0	53	0	0	0	0	0	0	74	0	0	0	9	0
OTU_208	Eukaryota	Alveolata	Dinophyta	Dinophyceae	Dinophyceae_X	Dinophyceae_XX	Scrippsiella	Scrippsiella_sp._strain1	0	0	0	0	726	1	0	0	0	0	0	0	0	0	0	0	0	0	0	0	0	0	0	0	0	0	0	0	0	0	0	0	0	0
OTU_209	Eukaryota	Alveolata	Dinophyta	Dinophyceae	Dinophyceae_X	Dinophyceae_XX	Dinophyceae_XXX	Dinophyceae_XXX_sp.	0	0	0	0	0	0	0	0	0	0	0	0	0	0	0	0	0	0	0	0	0	0	0	0	0	0	0	0	0	0	0	791	0	0
OTU_211	Eukaryota	Alveolata	Dinophyta	Dinophyceae	Dinophyceae_X	Dinophyceae_XX	Azadinium	Azadinium_sp.	149	0	0	0	0	0	0	0	0	0	0	0	0	0	0	0	0	0	0	0	0	0	0	0	0	0	0	0	0	0	0	0	0	0
OTU_212	Eukaryota	Stramenopiles	Stramenopiles_X	MAST	MAST-8	MAST-8A	MAST-8A_X	MAST-8A_X_sp.	0	83	0	0	0	0	0	0	107	0	0	4	0	0	0	0	0	0	0	0	108	74	0	0	0	0	0	11	162	0	0	18	0	0
OTU_214	Eukaryota	Archaeplastida	Chlorophyta	Mamiellophyceae	Dolichomastigales	Crustomastigaceae	Crustomastix	Crustomastix_didyma	0	0	0	0	0	0	0	0	0	0	0	0	714	0	0	0	0	0	0	0	0	0	0	0	0	0	0	0	0	0	0	0	0	0
OTU_215	Eukaryota	Stramenopiles	Stramenopiles_X	MAST	MAST-12	MAST-12A	MAST-12A_X	MAST-12A_X_sp.	2	0	0	0	0	0	0	0	0	86	0	0	0	0	93	7	2	0	0	0	0	0	0	172	0	1	0	0	0	0	0	0	0	0
OTU_218	Eukaryota	Stramenopiles	Ochrophyta	Chrysophyceae	Chrysophyceae_X	Chrysophyceae_Clade-C	Multi-affiliation	Multi-affiliation	0	1	0	0	0	0	0	0	0	0	0	0	0	0	0	0	0	0	0	0	0	0	0	0	0	0	0	0	0	0	0	0	0	0
OTU_220	Eukaryota	Amoebozoa	Lobosa	Tubulinea	Leptomyxida	Rhizamoeba-saxonica-lineage	Rhizamoeba	Rhizamoeba_saxonica	0	0	0	0	0	0	0	0	0	0	0	0	0	0	0	0	0	0	0	0	0	0	709	0	0	0	0	0	0	0	19	0	0	0
OTU_221	Eukaryota	Stramenopiles	Ochrophyta	Bacillariophyta	Bacillariophyta_X	Polar-centric-Mediophyceae	Multi-affiliation	Multi-affiliation	0	0	0	0	0	0	0	0	0	0	0	0	0	0	12	0	0	0	0	0	0	0	0	2	0	182	359	0	0	0	0	0	0	0
OTU_222	Eukaryota	Hacrobia	Katablepharidophyta	Katablepharidaceae	Katablepharidales	Katablepharidales_X	Katablepharidales_XX	Katablepharidales_XX_sp._strain2	0	0	0	2	0	0	0	0	0	0	0	0	0	0	0	0	0	0	0	0	0	0	0	0	0	0	0	0	0	0	0	0	0	0
OTU_223	Eukaryota	Alveolata	Ciliophora	Litostomatea	Haptoria	Litonotidae	Loxophyllum	Loxophyllum_perihoplophorum	0	0	0	0	0	0	0	0	0	0	0	0	0	0	0	0	0	0	0	2	0	48	0	0	0	0	0	0	0	0	635	0	0	0
OTU_224	Eukaryota	Stramenopiles	Ochrophyta	Bacillariophyta	Bacillariophyta_X	Araphid-pennate	Araphid-pennate_X	Araphid-pennate_X_sp.	0	0	0	0	0	130	0	0	0	0	0	0	0	0	0	0	31	152	55	0	0	0	0	0	0	18	299	0	0	0	0	0	0	0
OTU_227	Eukaryota	Opisthokonta	Fungi	Basidiomycota	Agaricomycotina	Agaricomycetes	Oligoporus	Oligoporus_caesius	0	0	0	77	0	0	0	0	1	0	0	0	0	0	0	0	0	0	0	0	0	0	0	0	0	0	0	0	685	0	162	0	0	0
OTU_228	Eukaryota	Alveolata	Apicomplexa	Apicomplexa_X	Gregarines	Gregarines_X	Gregarines_XX	Gregarines_XX_sp.	0	0	0	0	0	0	0	0	0	0	0	0	0	0	0	0	0	0	0	0	0	0	0	0	0	672	0	0	0	0	0	0	0	0
OTU_230	Eukaryota	Archaeplastida	Chlorophyta	Chlorophyceae	Sphaeropleales	Sphaeropleales_X	Pseudomuriella	Pseudomuriella_sp.	0	0	0	0	51	0	0	0	0	0	0	0	0	0	11	0	0	0	0	0	0	0	0	285	0	0	0	0	0	0	0	0	0	0
OTU_231	Eukaryota	Alveolata	Dinophyta	Syndiniales	Dino-Group-II	Multi-affiliation	Multi-affiliation	Multi-affiliation	86	0	0	0	0	0	0	0	0	0	0	0	0	0	0	0	538	4	0	0	0	0	0	0	2	7	0	0	0	0	0	0	0	0
OTU_232	Eukaryota	Opisthokonta	Mesomycetozoa	Ichthyosporea	Ichthyosphonida	Abeoformidae_Group_MAIP_1	Abeoformidae_Group_MAIP_1_X	Abeoformidae_Group_MAIP_1_X_sp.	0	0	0	0	0	0	343	0	0	10	1	0	0	0	0	0	0	0	7	0	153	0	0	0	0	0	0	0	0	0	1	24	0	0
OTU_233	Eukaryota	Stramenopiles	Stramenopiles_X	Labyrinthulea	Labyrinthulales	Labyrinthulaceae	Labyrinthulaceae_X	Labyrinthulaceae_X_sp.	0	0	0	0	0	2	0	0	3	0	0	0	31	55	0	0	0	0	0	0	0	0	0	5	0	0	0	0	0	0	0	0	0	0
OTU_234	Eukaryota	Hacrobia	Telonemia	Telonemia_X	Telonemia_XX	Telonemia-Group-2	Telonemia-Group-2_X	Telonemia-Group-2_X_sp.	0	0	0	0	0	0	0	0	0	0	0	0	0	0	0	0	0	0	0	0	0	0	0	0	0	0	0	0	0	0	3	0	0	0
OTU_235	Eukaryota	Alveolata	Dinophyta	Syndiniales	Dino-Group-II	Dino-Group-II_X	Dino-Group-II_XX	Dino-Group-II_XX_sp.	0	0	0	0	0	0	0	0	0	0	0	0	0	0	0	0	0	0	0	0	0	0	0	0	635	0	0	0	0	0	0	0	0	0
OTU_236	Eukaryota	Multi-affiliation	Multi-affiliation	Multi-affiliation	Multi-affiliation	Multi-affiliation	Multi-affiliation	Multi-affiliation	0	0	0	0	0	0	0	0	0	0	0	0	0	0	0	0	0	0	0	0	0	0	0	0	0	0	1	0	0	0	0	0	0	0
OTU_238	Eukaryota	Stramenopiles	Ochrophyta	Bacillariophyta	Bacillariophyta_X	Raphid-pennate	Pleurosigma	Pleurosigma_sp.	536	0	0	0	0	5	0	0	0	0	0	0	0	0	0	0	23	0	0	0	0	0	0	0	45	29	0	0	0	0	0	0	0	0
OTU_239	Eukaryota	Rhizaria	Cercozoa	Filosa-Imbricatea	Thaumatomonadida	Thaumatomonadidae	Reckertia	Reckertia_filosa	0	0	0	0	0	0	0	2	0	0	0	0	0	0	0	0	0	0	0	1	3	2	0	0	0	0	0	0	0	0	0	0	0	0
OTU_240	Eukaryota	Opisthokonta	Fungi	Basidiomycota	Agaricomycotina	Tremellomycetes	Trichosporon	Trichosporon_dulcitum	0	0	0	0	0	0	0	0	0	614	0	0	0	0	0	0	0	0	0	0	0	0	0	0	0	0	0	0	0	0	0	0	0	0
OTU_241	Eukaryota	Alveolata	Dinophyta	Dinophyceae	Dinophyceae_X	Dinophyceae_XX	Protoperidinium	Protoperidinium_pellucidum	28	0	0	0	0	16	0	0	0	1	0	0	0	0	0	0	0	0	390	0	0	0	0	0	0	71	0	0	0	0	0	0	0	0
OTU_242	Eukaryota	Alveolata	Apicomplexa	Apicomplexa_X	Gregarines	Gregarines_X	Gregarines_XX	Gregarines_XX_sp.	0	0	0	0	0	0	0	0	0	0	0	0	0	0	0	0	0	0	0	0	0	0	0	0	0	0	613	0	0	0	0	0	0	0
OTU_243	Eukaryota	Stramenopiles	Ochrophyta	Bacillariophyta	Bacillariophyta_X	Raphid-pennate	Multi-affiliation	Multi-affiliation	8	0	0	0	14	11	1	0	0	0	4	0	0	0	110	0	49	74	377	0	0	1	86	0	158	281	0	0	0	0	0	0	0	0
OTU_245	Eukaryota	Rhizaria	Cercozoa	Filosa-Thecofilosea	Filosa-Thecofilosea_X	Mataza-lineage	Mataza-lineage_X	Multi-affiliation	570	0	0	0	0	0	0	0	0	0	0	0	0	0	0	0	0	0	0	0	0	0	0	0	0	0	0	0	0	0	0	0	0	0
OTU_246	Eukaryota	Alveolata	Dinophyta	Syndiniales	Dino-Group-II	Dino-Group-II-Clade-3	Dino-Group-II-Clade-3_X	Dino-Group-II-Clade-3_X_sp.	0	0	0	0	0	0	0	0	0	0	0	0	20	0	0	0	0	0	0	0	0	0	0	0	0	0	0	0	0	0	0	0	6	234
OTU_247	Eukaryota	Stramenopiles	Ochrophyta	Bacillariophyta	Bacillariophyta_X	Multi-affiliation	Multi-affiliation	Multi-affiliation	1	0	0	0	0	0	9	0	0	0	0	0	0	0	0	0	0	0	0	0	0	0	44	158	21	233	0	0	0	0	0	0	0	0
OTU_248	Eukaryota	Alveolata	Dinophyta	Dinophyceae	Dinophyceae_X	Dinophyceae_XX	Archaeperidinium	Archaeperidinium_minutum	0	0	0	0	0	0	0	0	0	0	541	0	0	0	0	0	0	0	0	0	0	0	0	0	0	0	0	0	0	0	0	0	0	0
OTU_249	Eukaryota	Alveolata	Ciliophora	Colpodea	Colpodida	Colpodidae	Colpoda	Colpoda_sp.	0	0	0	0	0	0	0	0	0	0	0	0	0	0	0	0	0	0	0	0	0	0	541	0	0	0	0	0	0	0	0	0	0	0
OTU_250	Eukaryota	Amoebozoa	Lobosa	Discosea-Flabellinia	Dactylopodida	Paramoebidae	Neoparamoeba	Neoparamoeba_pemaquidensis	0	0	0	0	0	0	0	0	0	0	0	0	0	0	0	0	0	0	0	0	0	529	0	0	0	0	0	0	0	0	0	0	0	0
OTU_252	Eukaryota	Opisthokonta	Fungi	Ascomycota	Saccharomycotina	Saccharomycetales	Metschnikowia	Metschnikowia_zobellii	0	0	0	0	2	0	0	0	0	0	0	0	0	0	316	54	0	0	0	0	0	0	130	0	0	0	0	0	0	0	0	0	1	0
OTU_253	Eukaryota	Alveolata	Dinophyta	Dinophyceae	Suessiales	Suessiales_X	Suessiales_XX	Suessiales_XX_sp.	0	1	0	0	0	0	0	0	0	0	0	0	0	0	0	0	0	2	0	0	0	467	0	0	0	0	0	0	0	0	0	0	0	0
OTU_258	Eukaryota	Alveolata	Ciliophora	Phyllopharyngea	Cyrtophoria	Dysteriidae	Dysteria	Dysteria_sp.	0	0	11	0	0	0	0	0	0	0	0	0	0	0	0	0	0	0	0	0	0	0	132	20	0	0	0	0	0	0	0	0	0	0
OTU_259	Eukaryota	Opisthokonta	Fungi	Ascomycota	Saccharomycotina	Saccharomycetales	Galactomyces	Galactomyces_geotrichum	0	0	0	0	0	0	0	0	0	0	0	0	0	0	0	0	0	0	1	0	0	0	0	0	0	0	0	0	0	0	0	0	0	0
OTU_260	Eukaryota	Alveolata	Ciliophora	Phyllopharyngea	Suctoria	Acinetidae	Acineta	Acineta_tuberosa	0	0	0	0	129	102	2	0	0	27	0	0	0	0	0	0	0	28	0	0	0	0	4	0	100	0	0	0	0	0	91	0	0	0
OTU_261	Eukaryota	Amoebozoa	Lobosa	Discosea-Flabellinia	Dactylopodida	Paramoebidae	Neoparamoeba	Neoparamoeba_pemaquidensis	0	0	0	0	0	0	0	0	0	0	0	0	0	0	0	0	0	0	0	0	3	585	0	0	0	0	0	0	0	0	0	0	0	0
OTU_262	Eukaryota	Opisthokonta	Fungi	Basidiomycota	Agaricomycotina	Agaricomycetes	Psathyrella	Psathyrella_candolleana	0	0	0	0	0	0	0	0	0	0	0	0	0	0	0	0	0	24	0	0	0	0	0	0	0	0	0	0	74	0	0	0	0	0
OTU_263	Eukaryota	Alveolata	Dinophyta	Dinophyceae	Dinophyceae_X	Dinophyceae_XX	Protoperidinium	Protoperidinium_punctulatum	0	0	0	0	0	0	0	0	0	0	0	0	0	0	0	0	0	0	0	0	0	0	0	0	0	480	0	0	0	0	0	0	0	0
OTU_264	Eukaryota	Alveolata	Dinophyta	Dinophyceae	Dinophyceae_X	Dinophyceae_XX	Protoperidinium	Protoperidinium_thulesense	0	0	0	0	0	0	0	0	0	0	0	0	0	0	465	0	0	0	0	0	0	0	0	1	0	0	0	0	0	0	0	0	0	0
OTU_266	Eukaryota	Alveolata	Ciliophora	Spirotrichea	Choreotrichia	Dictyocystidae	Codonellopsis	Codonellopsis_nipponica	0	0	0	0	0	10	60	0	0	5	36	0	0	0	2	0	90	91	54	0	0	0	0	0	0	39	0	0	0	0	0	0	0	0
OTU_267	Eukaryota	Alveolata	Ciliophora	Phyllopharyngea	Multi-affiliation	Multi-affiliation	Multi-affiliation	Multi-affiliation	0	0	0	0	0	0	0	0	0	0	0	0	0	0	0	0	0	0	0	0	0	0	0	0	0	0	0	0	0	0	0	1	0	0
OTU_268	Eukaryota	Rhizaria	Cercozoa	Filosa-Thecofilosea	Cryomonadida	Protaspa-lineage	Protaspa-lineage_X	Protaspa-lineage_X_sp.	0	0	0	0	0	0	0	0	0	0	0	0	0	0	0	0	0	0	0	0	0	0	98	0	0	0	0	0	0	0	0	0	0	0
OTU_269	Eukaryota	Alveolata	Dinophyta	Syndiniales	Dino-Group-II	Dino-Group-II_X	Dino-Group-II_XX	Dino-Group-II_XX_sp.	0	0	0	0	0	0	0	0	0	0	0	0	0	0	0	0	0	0	0	0	0	0	0	0	400	0	0	0	0	0	0	0	0	0
OTU_270	Eukaryota	Apusozoa	Apusomonadidae	Apusomonadidae_Group-2	Apusomonadidae_Group-2B	Apusomonadidae_Group-2B_X	Apusomonadidae_Group-2B_XX	Apusomonadidae_Group-2B_XX_sp.	0	462	0	0	0	0	0	0	0	0	0	0	0	0	0	0	0	0	0	0	0	0	0	0	0	0	0	0	0	0	0	0	0	0
OTU_271	Eukaryota	Archaeplastida	Chlorophyta	Ulvophyceae	Ulvales-relatives	Ulvales-relatives_X	Pirula	Pirula_salina	0	25	0	0	0	0	0	42	0	0	0	0	0	0	68	0	1	0	0	0	0	0	458	0	0	0	0	0	1	0	0	0	0	0
OTU_272	Eukaryota	Rhizaria	Cercozoa	Filosa-Thecofilosea	Cryomonadida	Protaspa-lineage	Protaspa-lineage_X	Protaspa-lineage_X_sp.	0	0	0	0	0	0	0	0	0	0	0	0	0	0	0	0	0	0	0	0	450	0	0	0	0	0	0	0	0	0	0	0	0	0
OTU_273	Eukaryota	Rhizaria	Cercozoa	Filosa-Thecofilosea	Multi-affiliation	Multi-affiliation	Multi-affiliation	Multi-affiliation	0	0	0	0	9	0	9	0	0	0	0	0	0	0	21	6	0	0	0	0	0	0	0	397	0	0	0	0	0	0	0	0	0	0
OTU_274	Eukaryota	Opisthokonta	Fungi	Basidiomycota	Agaricomycotina	Agaricomycetes	Multi-affiliation	Multi-affiliation	0	0	0	0	0	0	0	0	0	0	0	0	0	0	0	0	0	0	0	0	0	0	0	0	0	0	0	0	294	0	444	0	0	0
OTU_275	Eukaryota	Opisthokonta	Choanoflagellida	Choanoflagellatea	Acanthoecida	Acanthoecida_X	Acanthoecida_XX	Acanthoecida_XX_sp.	0	0	0	0	0	0	0	0	0	0	0	0	0	0	0	0	0	0	0	0	0	0	438	0	0	0	0	0	0	0	0	0	0	0
OTU_276	Eukaryota	Alveolata	Dinophyta	Dinophyceae	Dinophyceae_X	Dinophyceae_XX	Dinophyceae_XXX	Dinophyceae_XXX_sp.	0	0	0	0	0	0	0	0	0	0	0	0	0	0	0	0	0	0	0	0	55	0	0	0	0	0	0	435	0	2	0	0	0	0
OTU_277	Eukaryota	Excavata	Discoba	Euglenozoa	Diplonemea	Diplonemea_X	Rhynchopus	Rhynchopus_sp.	0	0	0	0	0	0	1	0	0	0	0	0	0	0	0	0	0	0	0	0	0	0	0	0	0	0	0	0	0	0	0	0	0	0
OTU_278	Eukaryota	Opisthokonta	Choanoflagellida	Choanoflagellatea	Craspedida	Monosigidae_Group_B	Monosigidae_Group_B_X	Monosigidae_Group_B_X_sp.	0	0	0	0	0	0	0	0	0	0	0	0	0	0	0	0	0	0	0	0	0	50	244	0	0	0	0	0	0	0	0	4	0	0
OTU_279	Eukaryota	Hacrobia	Haptophyta	Prymnesiophyceae	Isochrysidales	Noelaerhabdaceae	Emiliania_Gephyrocapsa	Emiliania_Gephyrocapsa_sp	8	0	0	0	0	3	0	2	0	255	0	0	0	0	0	78	0	0	0	0	1	0	0	5	0	46	0	0	0	0	2	0	0	0
OTU_280	Eukaryota	Stramenopiles	Ochrophyta	Bacillariophyta	Bacillariophyta_X	Polar-centric-Mediophyceae	Chaetoceros	Multi-affiliation	0	0	0	0	0	0	0	0	0	4	0	0	0	0	0	0	0	0	0	0	0	0	0	0	0	13	0	0	292	0	0	0	0	0
OTU_281	Eukaryota	Alveolata	Dinophyta	Dinophyceae	Dinophyceae_X	Dinophyceae_XX	Gonyaulax	Gonyaulax_spinifera_strain1	0	0	0	0	9	0	0	0	0	0	0	0	0	0	11	14	0	0	0	0	0	0	0	0	0	0	0	0	0	0	0	0	0	0
OTU_282	Eukaryota	Alveolata	Dinophyta	Dinophyceae	Dinophyceae_X	Dinophyceae_XX	Dinophyceae_XXX	Dinophyceae_XXX_sp.	1	0	0	0	0	239	0	0	0	0	0	0	0	0	0	0	0	0	2	0	0	0	0	0	108	34	14	0	0	0	0	0	0	0
OTU_283	Eukaryota	Opisthokonta	Fungi	Basidiomycota	Pucciniomycotina	Cystobasidiomycetes	Sporobolomyces	Sporobolomyces_syzygii	0	0	0	0	0	0	0	0	0	0	0	0	0	0	0	0	0	0	0	0	0	0	0	0	0	0	0	0	11	0	0	0	0	0
OTU_284	Eukaryota	Opisthokonta	Fungi	Ascomycota	Pezizomycotina	Multi-affiliation	Multi-affiliation	Multi-affiliation	0	0	0	0	3	0	0	0	0	0	0	0	0	0	0	0	0	0	0	0	0	0	0	0	0	0	0	0	0	0	0	0	0	0
OTU_287	Eukaryota	Opisthokonta	Fungi	Basidiomycota	Agaricomycotina	Agaricomycetes	Marasmius	Marasmius_alliaceus	0	0	0	0	0	0	0	0	0	0	0	0	0	0	0	0	0	0	0	0	0	0	0	0	0	0	0	0	201	0	380	0	6	0
OTU_289	Eukaryota	Stramenopiles	Ochrophyta	Phaeophyceae	Phaeophyceae_X	Phaeophyceae_XX	Fucus	Multi-affiliation	0	0	0	0	0	0	0	0	0	0	0	0	0	0	0	0	0	0	0	0	0	0	397	0	0	0	0	0	0	0	0	0	0	0
OTU_290	Eukaryota	Alveolata	Dinophyta	Dinophyceae	Dinophyceae_X	Dinophyceae_XX	Multi-affiliation	Multi-affiliation	0	0	0	0	0	0	0	0	0	0	0	0	280	0	0	0	0	0	0	0	0	0	0	0	0	0	0	0	0	1	0	3	0	0
OTU_295	Eukaryota	Opisthokonta	Fungi	Basidiomycota	Agaricomycotina	Agaricomycetes	Rhizochaete	Rhizochaete_radicata	0	0	0	0	0	0	0	0	0	0	39	0	368	0	0	0	0	0	0	0	15	0	0	0	0	0	0	0	86	1	0	0	18	0
OTU_296	Eukaryota	Stramenopiles	Stramenopiles_X	Labyrinthulea	Labyrinthulales	Labyrinthulaceae	Labyrinthulaceae_X	Labyrinthulaceae_X_sp.	0	0	0	0	0	0	0	0	0	0	0	0	0	0	0	0	0	0	0	0	0	11	0	0	0	0	0	0	0	0	0	0	0	0
OTU_297	Eukaryota	Alveolata	Dinophyta	Dinophyceae	Dinophyceae_X	Dinophyceae_XX	Protoperidinium	Protoperidinium_thulesense	0	0	0	0	0	0	0	0	0	0	0	0	0	0	331	0	0	0	0	0	0	0	0	0	0	0	0	0	0	0	0	0	0	0
OTU_298	Eukaryota	Opisthokonta	Choanoflagellida	Choanoflagellatea	Craspedida	Monosigidae_Group_M	Salpingoeca_M	Salpingoeca_urceolata	0	0	0	0	0	0	0	0	0	0	0	0	0	364	0	0	0	0	0	0	0	0	0	0	0	0	0	0	0	0	0	0	0	0
OTU_299	Eukaryota	Archaeplastida	Chlorophyta	Trebouxiophyceae	Chlorellales	Chlorellales_X	Picochlorum	Picochlorum_sp.	1	0	0	0	24	5	0	0	0	0	0	0	0	0	0	0	0	0	0	0	0	0	0	0	0	18	0	0	0	0	0	0	0	0
OTU_300	Eukaryota	Alveolata	Ciliophora	Oligohymenophorea	Sessilida	Vorticellidae	Vorticella	Vorticella_sp.	0	0	0	0	0	0	0	0	0	0	0	0	0	0	0	0	0	0	0	0	0	0	354	0	0	0	0	0	0	0	0	0	0	0
OTU_301	Eukaryota	Alveolata	Ciliophora	Oligohymenophorea	Scuticociliatia	Uronematidae	Uronema_ciliate	Uronema_marinum	0	0	0	0	0	0	0	0	0	0	0	0	0	0	21	0	0	0	0	0	0	0	0	0	0	0	0	0	0	0	0	0	0	0
OTU_303	Eukaryota	Stramenopiles	Ochrophyta	Bacillariophyta	Bacillariophyta_X	Araphid-pennate	Multi-affiliation	Multi-affiliation	352	0	0	0	0	0	0	0	0	0	0	0	0	0	0	0	0	0	0	0	0	0	0	0	0	0	0	0	0	0	0	0	0	0
OTU_305	Eukaryota	Alveolata	Ciliophora	Oligohymenophorea	Peritrichia	Vaginicolidae	Vaginicolidae_X	Vaginicolidae_X_sp.	0	0	0	0	0	0	0	0	0	0	0	0	234	9	0	0	0	0	0	0	0	0	0	0	0	0	0	0	0	0	0	0	0	0
OTU_306	Eukaryota	Stramenopiles	Ochrophyta	Bacillariophyta	Bacillariophyta_X	Raphid-pennate	Raphid-pennate_X	Raphid-pennate_X_sp.	0	0	0	0	0	0	0	0	0	0	0	0	0	0	0	0	0	0	0	0	0	0	2	0	0	0	0	0	0	0	0	0	0	0
OTU_307	Eukaryota	Opisthokonta	Mesomycetozoa	Ichthyosporea	Ichthyosphonida	Abeoformidae_Group_MAIP_2	Abeoformidae_Group_MAIP_2_X	Abeoformidae_Group_MAIP_2_X_sp.	123	0	0	0	0	1	8	0	0	0	77	0	0	0	0	0	0	30	1	0	0	0	0	0	22	27	31	0	0	0	0	0	0	0
OTU_308	Eukaryota	Stramenopiles	Stramenopiles_X	MAST	MAST-12	MAST-12A	MAST-12A_X	MAST-12A_X_sp.	0	0	0	0	0	0	2	0	0	0	0	0	0	0	0	0	0	1	330	0	0	0	0	0	0	0	0	0	0	0	0	0	0	0
OTU_309	Eukaryota	Stramenopiles	Ochrophyta	Bacillariophyta	Bacillariophyta_X	Polar-centric-Mediophyceae	Thalassiosira	Thalassiosira_profunda	0	0	0	0	0	0	0	0	0	4	0	0	0	0	70	0	0	0	0	0	0	0	0	0	0	3	0	0	0	0	0	0	0	0
OTU_310	Eukaryota	Amoebozoa	Lobosa	Discosea-Flabellinia	Dactylopodida	Paramoebidae	Neoparamoeba	Neoparamoeba_pemaquidensis	0	0	0	0	0	0	0	0	0	0	0	0	0	0	0	0	0	0	0	0	305	41	0	0	0	0	0	0	0	0	0	0	0	0
OTU_311	Eukaryota	Archaeplastida	Chlorophyta	Chlorophyceae	Sphaeropleales	Multi-affiliation	Multi-affiliation	Multi-affiliation	0	0	0	0	10	0	0	0	0	0	0	0	0	0	0	0	0	0	0	0	0	0	0	0	0	0	0	0	0	0	0	0	0	0
OTU_312	Eukaryota	Alveolata	Ciliophora	Phyllopharyngea	Cyrtophoria	Dysteriidae	Dysteriidae_X	Dysteriidae_X_sp.	0	0	0	0	0	0	0	0	0	0	0	0	0	0	0	0	345	0	0	0	0	0	0	0	0	0	0	0	0	0	0	0	0	0
OTU_313	Eukaryota	Alveolata	Dinophyta	Multi-affiliation	Multi-affiliation	Multi-affiliation	Multi-affiliation	Multi-affiliation	0	0	0	0	0	0	0	0	0	0	0	0	308	0	0	0	0	0	0	0	0	0	0	0	0	0	0	0	0	32	0	0	0	0
OTU_314	Eukaryota	Opisthokonta	Fungi	Basidiomycota	Agaricomycotina	Agaricomycetes	Multi-affiliation	Multi-affiliation	0	0	0	83	0	0	0	0	0	0	57	0	0	0	0	0	0	1	0	0	0	0	0	0	0	0	0	0	1	0	9	0	0	0
OTU_315	Eukaryota	Archaeplastida	Chlorophyta	Chlorophyceae	Chlamydomonadales	Chlamydomonadales_X	Chlamydomonas	Chlamydomonas_sp.	0	0	0	0	0	0	0	0	0	0	0	0	0	0	0	0	0	0	0	2	0	301	0	0	0	0	0	0	0	0	6	0	0	0
OTU_316	Eukaryota	Hacrobia	Haptophyta	Prymnesiophyceae	Isochrysidales	Isochrysidaceae	Tisochrysis	Tisochrysis_lutea	0	4	0	0	7	0	0	0	0	0	0	1	0	0	3	0	0	0	0	0	0	0	74	0	0	0	0	0	0	0	0	0	0	0
OTU_317	Eukaryota	Alveolata	Ciliophora	Spirotrichea	Oligotrichia	Strombidiidae	Strombidium	Strombidium_biarmatum	5	0	0	0	0	0	0	0	0	0	20	0	0	0	0	0	0	0	0	0	0	0	10	0	0	139	41	0	59	0	0	0	0	0
OTU_318	Eukaryota	Rhizaria	Cercozoa	Filosa-Thecofilosea	Ebriida	Ebriidae	Ebria	Ebria_tripartita	0	0	0	0	0	0	0	0	0	0	0	0	0	0	0	0	0	0	0	0	0	0	0	0	328	0	0	0	0	0	0	0	0	0
OTU_319	Eukaryota	Alveolata	Ciliophora	Spirotrichea	Hypotrichia	Holostichidae	Holosticha	Multi-affiliation	0	0	0	0	0	0	318	0	0	0	0	0	0	0	0	0	17	0	0	0	0	0	0	0	0	0	0	0	0	0	0	0	0	0
OTU_321	Eukaryota	Stramenopiles	Stramenopiles_X	Labyrinthulea	Multi-affiliation	Multi-affiliation	Multi-affiliation	Multi-affiliation	0	0	0	0	0	0	0	0	0	0	0	0	0	0	3	0	0	0	0	0	0	0	0	0	0	2	0	0	0	0	0	253	0	0
OTU_322	Eukaryota	Alveolata	Apicomplexa	Apicomplexa_X	Gregarines	Gregarines_X	Gregarines_XX	Gregarines_XX_sp.	0	0	0	0	0	0	0	0	0	0	0	0	0	0	0	10	0	0	0	0	0	0	47	0	0	0	0	0	0	0	0	0	0	0
OTU_323	Eukaryota	Alveolata	Dinophyta	Dinophyceae	Dinophyceae_X	Dinophyceae_XX	Gymnodinium	Gymnodinium_dorsalisulcum	0	0	0	0	0	0	0	0	0	0	0	0	0	0	0	0	0	0	0	0	0	0	0	0	0	0	0	0	316	0	0	0	0	0
OTU_324	Eukaryota	Alveolata	Dinophyta	Dinophyceae	Dinophyceae_X	Dinophyceae_XX	Dinophyceae_XXX	Dinophyceae_XXX_sp.	0	0	0	0	0	0	0	0	0	0	0	0	32	0	0	0	0	0	0	0	0	0	0	160	28	0	0	0	0	0	0	0	0	0
OTU_326	Eukaryota	Rhizaria	Cercozoa	Filosa-Thecofilosea	Cryomonadida	Protaspa-lineage	Protaspa	Protaspa_obliqua	0	0	0	0	2	0	0	0	0	0	0	0	0	0	0	0	0	0	0	0	0	0	0	0	0	0	0	0	0	0	0	0	0	0
OTU_327	Eukaryota	Archaeplastida	Chlorophyta	Ulvophyceae	Ulotrichales	Ulotrichales_X	Urospora	Urospora_neglecta	0	0	0	0	0	0	0	0	0	0	0	0	0	0	9	0	0	0	0	0	0	0	61	127	0	0	0	0	24	0	0	0	0	0
OTU_329	Eukaryota	Stramenopiles	Stramenopiles_X	Oomycota	Oomycota_X	Haliphthorales	Multi-affiliation	Multi-affiliation	0	0	0	0	0	0	0	0	0	0	0	0	0	0	0	0	0	302	0	0	0	0	0	0	0	0	0	0	0	0	0	0	0	0
OTU_330	Eukaryota	Alveolata	Ciliophora	Phyllopharyngea	Cyrtophoria	Chlamydodontidae	Cyrtophoron	Cyrtophoron_sp.	0	0	0	0	0	0	0	0	0	0	0	0	0	0	0	0	0	0	0	0	0	0	301	0	0	0	0	0	0	0	0	0	0	0
OTU_332	Eukaryota	Alveolata	Ciliophora	Spirotrichea	Euplotia	Uronychiidae	Diophrys	Multi-affiliation	0	0	0	0	0	0	132	0	0	0	0	0	0	0	0	0	0	0	0	0	0	0	0	22	0	0	0	0	0	0	0	0	161	0
OTU_333	Eukaryota	Rhizaria	Cercozoa	Filosa-Imbricatea	Filosa-Imbricatea_X	Novel-clade-3	Novel-clade-3_X	Novel-clade-3_X_sp.	0	0	0	0	0	70	0	0	0	0	0	0	0	0	0	0	0	0	3	0	0	0	0	0	0	0	0	0	0	0	0	0	0	0
OTU_334	Eukaryota	Rhizaria	Cercozoa	Endomyxa-Ascetosporea	Paradinida	Paradinidae	Paradinidae_X	Paradinidae_X_sp.	0	0	0	0	10	0	0	0	0	0	0	0	0	0	33	0	0	0	0	0	0	0	0	0	0	0	0	0	0	0	0	0	0	0
OTU_335	Eukaryota	Alveolata	Dinophyta	Syndiniales	Dino-Group-I	Dino-Group-I-Clade-4	Euduboscquella	Euduboscquella_crenulata	9	0	0	0	0	0	2	0	0	0	1	0	0	0	0	0	1	64	173	0	0	0	0	0	0	191	0	0	0	0	0	0	0	0
OTU_336	Eukaryota	Stramenopiles	Stramenopiles_X	MAST	MAST-12	MAST-12A	MAST-12A_X	MAST-12A_X_sp.	0	0	0	0	0	0	0	0	0	0	0	0	0	0	60	0	0	0	45	0	0	0	0	0	0	0	0	0	0	0	0	0	0	0
OTU_337	Eukaryota	Rhizaria	Cercozoa	Filosa-Thecofilosea	Ebriida	Botuliformidae	Botuliforma	Botuliforma_benthica	0	0	0	0	230	0	0	0	0	0	0	0	0	0	0	0	0	0	0	0	0	0	0	0	0	0	0	0	0	34	0	0	0	0
OTU_339	Eukaryota	Archaeplastida	Chlorophyta	Prasino-Clade-V	Pseudoscourfieldiales	Pycnococcaceae	Multi-affiliation	Multi-affiliation	0	0	0	0	0	0	0	0	0	0	2	0	0	0	0	0	2	3	0	0	0	0	0	0	0	0	0	0	1	0	0	0	41	0
OTU_341	Eukaryota	Stramenopiles	Stramenopiles_X	Labyrinthulea	Labyrinthulales	Labyrinthulaceae	Aplanochytrium	Aplanochytrium_kerguelense	0	0	0	0	0	0	0	0	0	0	0	3	0	0	0	0	0	0	0	0	0	0	0	0	0	0	0	2	44	0	0	5	0	0
OTU_344	Eukaryota	Alveolata	Dinophyta	Dinophyceae	Dinophyceae_X	Dinophyceae_XX	Gymnodinium	Gymnodinium_sp.	0	1	243	33	0	0	0	0	0	0	0	0	0	0	0	0	0	0	0	0	0	0	0	0	0	0	0	0	0	0	0	0	0	0
OTU_345	Eukaryota	Stramenopiles	Ochrophyta	Bacillariophyta	Bacillariophyta_X	Polar-centric-Mediophyceae	Multi-affiliation	Multi-affiliation	0	0	0	0	10	0	0	0	0	0	0	0	0	0	36	51	0	0	0	0	0	0	14	36	1	0	1	0	0	0	0	0	0	0
OTU_346	Eukaryota	Stramenopiles	Stramenopiles_X	MAST	MAST-6	MAST-6_X	MAST-6_XX	MAST-6_XX_sp.	0	2	0	0	0	0	0	0	0	0	0	3	0	125	0	0	0	0	0	1	0	7	0	0	0	0	0	0	0	0	0	20	0	0
OTU_347	Eukaryota	Alveolata	Ciliophora	Phyllopharyngea	Suctoria	Paracinetidae	Paracineta	Paracineta_limbata	0	0	0	0	0	0	0	0	0	0	0	0	0	0	0	0	0	0	0	270	0	0	0	0	0	0	0	0	0	0	0	0	0	0
OTU_348	Eukaryota	Opisthokonta	Multi-affiliation	Multi-affiliation	Multi-affiliation	Multi-affiliation	Multi-affiliation	Multi-affiliation	0	0	0	0	0	0	0	0	0	0	0	0	0	0	0	0	0	0	0	0	0	0	0	0	0	0	0	0	0	0	0	23	0	0
OTU_349	Eukaryota	Alveolata	Dinophyta	Syndiniales	Dino-Group-II	Dino-Group-II-Clade-8	Dino-Group-II-Clade-8_X	Dino-Group-II-Clade-8_X_sp.	0	2	0	0	0	0	0	0	0	0	0	0	0	0	0	0	0	0	0	0	2	0	0	0	0	0	0	0	0	0	0	0	0	23
OTU_350	Eukaryota	Alveolata	Dinophyta	Dinophyceae	Dinophyceae_X	Dinophyceae_XX	Multi-affiliation	Multi-affiliation	0	0	0	0	0	0	0	0	0	0	0	0	118	0	0	0	0	0	0	0	0	0	0	0	0	69	82	0	0	0	0	0	0	0
OTU_351	Eukaryota	Alveolata	Dinophyta	Dinophyceae	Dinophyceae_X	Dinophyceae_XX	Bysmatrum	Bysmatrum_subsalsum	0	4	0	0	0	0	0	0	3	0	0	0	3	7	0	0	0	0	0	0	0	0	0	0	0	0	0	0	5	0	0	1	87	1
OTU_357	Eukaryota	Alveolata	Ciliophora	Spirotrichea	Hypotrichia	Hypotrichia_X	Bergeriella	Bergeriella_ovata	0	0	0	0	0	0	0	0	0	0	0	0	0	0	0	0	0	0	0	0	0	0	0	252	0	0	0	0	0	0	0	0	0	0
OTU_361	Eukaryota	Multi-affiliation	Multi-affiliation	Multi-affiliation	Multi-affiliation	Multi-affiliation	Multi-affiliation	Multi-affiliation	0	0	0	0	0	204	0	0	0	0	3	0	0	0	0	0	16	0	0	0	0	0	0	0	0	8	0	0	0	0	0	0	0	0
OTU_362	Eukaryota	Alveolata	Ciliophora	Phyllopharyngea	Suctoria	Paracinetidae	Paracineta	Paracineta_limbata	0	0	0	0	0	0	0	0	0	0	246	0	0	0	0	0	0	0	0	0	0	0	0	0	0	0	0	0	0	0	0	0	0	0
OTU_363	Eukaryota	Stramenopiles	Ochrophyta	Bacillariophyta	Bacillariophyta_X	Radial-centric-basal-Coscinodiscophyceae	Actinoptychus	Actinoptychus_sp.	0	0	0	0	0	0	0	0	0	0	0	0	0	0	0	0	0	0	0	0	0	0	0	0	0	1	0	0	0	0	0	0	0	0
OTU_364	Eukaryota	Alveolata	Dinophyta	Syndiniales	Dino-Group-II	Dino-Group-II-Clade-6	Dino-Group-II-Clade-6_X	Dino-Group-II-Clade-6_X_sp.	0	0	0	0	0	0	0	0	0	0	0	0	0	0	0	0	0	0	0	0	0	0	0	0	0	0	0	0	0	0	0	0	18	0
OTU_365	Eukaryota	Opisthokonta	Fungi	Basidiomycota	Agaricomycotina	Agaricomycetes	Mycena	Mycena_plumbea	0	0	0	0	0	0	0	0	0	0	0	0	0	0	0	0	0	0	0	0	0	0	0	0	0	0	0	0	252	0	0	0	0	0
OTU_366	Eukaryota	Archaeplastida	Chlorophyta	Chlorophyceae	Sphaeropleales	Sphaeropleales_X	Coelastrum	Multi-affiliation	141	0	0	0	0	0	0	1	0	0	0	0	0	0	0	0	0	0	0	0	0	0	0	0	0	0	0	0	0	0	0	0	0	0
OTU_367	Eukaryota	Alveolata	Ciliophora	Oligohymenophorea	Peritrichia	Vaginicolidae	Vaginicolidae_X	Vaginicolidae_X_sp.	5	21	8	0	0	0	0	0	0	0	0	1	7	5	0	0	0	0	0	0	0	0	0	0	0	0	0	0	0	0	0	0	2	0
OTU_368	Eukaryota	Rhizaria	Cercozoa	Endomyxa-Ascetosporea	Haplosporida	Haplosporidiidae	Haplosporidium	Haplosporidium_nelsoni	0	0	0	0	0	0	66	0	142	0	0	0	0	0	0	0	0	0	0	0	0	0	0	0	0	0	0	0	0	0	2	0	0	0
OTU_369	Eukaryota	Alveolata	Dinophyta	Syndiniales	Dino-Group-I	Dino-Group-I-Clade-1	Dino-Group-I-Clade-1_X	Dino-Group-I-Clade-1_X_sp.	0	221	0	6	0	0	0	0	0	0	0	0	0	0	0	0	0	0	0	0	0	0	0	0	0	0	0	0	0	0	0	0	0	0
OTU_374	Eukaryota	Opisthokonta	Fungi	Ascomycota	Pezizomycotina	Leotiomycetes	Geomyces	Multi-affiliation	0	0	4	0	0	0	0	0	0	0	0	0	0	0	0	0	0	0	0	0	0	2	0	0	0	0	0	0	224	0	0	0	0	0
OTU_376	Eukaryota	Alveolata	Ciliophora	Oligohymenophorea	Sessilida	Vorticellidae	Vorticellidae_X	Vorticellidae_X_sp.	0	0	0	0	0	0	0	0	0	0	0	1	0	0	0	0	0	0	0	0	0	0	74	2	0	0	0	0	0	0	0	0	0	0
OTU_377	Eukaryota	Stramenopiles	Ochrophyta	Bacillariophyta	Bacillariophyta_X	Araphid-pennate	Licmophora	Licmophora_paradoxa	145	0	0	0	0	0	0	0	0	0	0	0	0	0	0	0	0	0	11	0	0	0	0	0	0	0	0	0	0	0	0	0	0	0
OTU_378	Eukaryota	Opisthokonta	Fungi	Ascomycota	Pezizomycotina	Dothideomycetes	Multi-affiliation	Multi-affiliation	0	0	0	0	0	0	0	0	0	0	0	0	0	0	0	0	0	0	0	0	0	0	0	1	0	10	0	0	0	0	0	0	0	0
OTU_381	Eukaryota	Opisthokonta	Choanoflagellida	Choanoflagellatea	Craspedida	Monosigidae_Group_N	Salpingoeca_N	Salpingoeca_pyxidium	0	0	0	0	0	0	0	0	0	0	0	0	0	0	0	0	0	0	0	0	0	0	223	0	0	0	0	0	0	0	0	0	0	0
OTU_384	Eukaryota	Multi-affiliation	Multi-affiliation	Multi-affiliation	Multi-affiliation	Multi-affiliation	Multi-affiliation	Multi-affiliation	0	0	0	0	0	0	0	0	0	0	0	0	0	0	0	0	0	1	0	0	0	0	0	0	0	0	0	0	0	0	0	0	0	0
OTU_385	Eukaryota	Rhizaria	Cercozoa	Filosa-Imbricatea	Thaumatomonadida	Thaumatomonadida_X	Thaumatomonadida_XX	Thaumatomonadida_XX_sp.	0	0	0	0	0	0	0	0	0	0	0	0	0	0	0	0	0	0	226	0	0	0	0	0	0	0	0	0	0	0	0	0	0	0
OTU_386	Eukaryota	Alveolata	Dinophyta	Dinophyceae	Suessiales	Suessiales_X	Symbiodinium	Symbiodinium_sp.	0	0	0	0	0	0	0	0	0	0	0	0	0	0	0	229	0	0	0	0	0	0	0	0	0	0	0	0	0	0	0	0	0	0
OTU_387	Eukaryota	Alveolata	Dinophyta	Syndiniales	Dino-Group-I	Dino-Group-I-Clade-2	Dino-Group-I-Clade-2_X	Dino-Group-I-Clade-2_X_sp.	0	0	0	0	0	0	0	0	0	0	0	0	0	0	0	26	0	0	0	0	0	0	0	0	0	0	0	0	0	0	0	0	0	0
OTU_388	Eukaryota	Rhizaria	Cercozoa	Filosa	Filosa_X	Filosa_XX	Discomonas	Discomonas_retusa	0	0	0	0	0	0	0	0	0	0	0	0	8	0	0	0	0	0	0	0	0	0	0	0	0	0	0	0	0	0	0	0	0	0
OTU_389	Eukaryota	Opisthokonta	Fungi	Basidiomycota	Agaricomycotina	Agaricomycetes	Thanatephorus	Thanatephorus_cucumeris	0	0	0	0	0	0	4	0	0	0	0	0	0	0	0	0	0	0	0	0	0	0	0	0	0	0	0	0	2	0	0	0	0	0
OTU_390	Eukaryota	Hacrobia	Cryptophyta	Cryptophyceae	Cryptophyceae_X	Cryptomonadales	Rhodomonas	Rhodomonas_sp.	0	0	0	0	0	0	0	0	0	0	0	0	0	0	0	0	218	0	0	0	0	0	0	0	0	0	0	0	0	0	0	0	0	0
OTU_391	Eukaryota	Stramenopiles	Ochrophyta	Bacillariophyta	Bacillariophyta_X	Polar-centric-Mediophyceae	Thalassiosira	Thalassiosira_pseudonana	102	0	0	0	0	0	0	0	0	45	0	0	0	0	0	0	0	0	0	0	0	0	0	42	0	2	36	0	0	0	0	0	0	0
OTU_392	Eukaryota	Stramenopiles	Ochrophyta	Bacillariophyta	Bacillariophyta_X	Polar-centric-Mediophyceae	Chaetoceros	Multi-affiliation	0	0	0	0	0	0	0	0	0	0	0	0	0	0	0	0	0	0	0	0	0	0	0	0	0	0	0	0	0	0	0	0	35	0
OTU_393	Eukaryota	Opisthokonta	Fungi	Basidiomycota	Agaricomycotina	Agaricomycetes	Tremellodendron	Tremellodendron_sp.	0	0	0	0	0	0	0	0	0	0	0	0	0	0	0	0	0	0	0	0	0	0	0	0	0	0	0	0	222	0	0	0	0	0
OTU_395	Eukaryota	Apusozoa	Apusomonadidae	Apusomonadidae_Group-2	Apusomonadidae_Group-2B	Apusomonadidae_Group-2B_X	Apusomonadidae_Group-2B_XX	Apusomonadidae_Group-2B_XX_sp.	0	0	0	0	0	0	0	0	0	0	0	0	0	0	2	1	0	195	0	0	0	0	0	0	0	0	0	0	1	0	0	0	0	0
OTU_396	Eukaryota	Opisthokonta	Fungi	Chytridiomycota	Chytridiomycotina	Chytridiomycetes	Spizellomycetales-and-Rhizophlyctidales	Spizellomycetales-and-Rhizophlyctidales_sp.	0	0	0	0	0	0	0	0	0	0	0	0	0	0	0	0	0	0	0	0	0	0	0	0	0	0	0	0	0	0	0	221	0	0
OTU_397	Eukaryota	Alveolata	Dinophyta	Dinophyceae	Dinophyceae_X	Dinophyceae_XX	Dinophyceae_XXX	Dinophyceae_XXX_sp.	0	0	0	0	0	0	0	0	0	0	0	0	0	0	0	0	0	0	0	0	0	0	0	0	0	0	0	0	0	0	0	75	0	0
OTU_398	Eukaryota	Archaeplastida	Chlorophyta	Chlorophyceae	Sphaeropleales	Selenastraceae	Monoraphidium	Monoraphidium_dybowskii	0	0	0	0	0	0	0	0	0	0	0	0	0	0	0	66	0	0	0	0	0	0	126	2	0	0	0	0	0	0	0	0	0	0
OTU_399	Eukaryota	Alveolata	Ciliophora	Oligohymenophorea	Mobilida	Trichodinidae	Trichodina	Trichodina_sinonovaculae	10	0	42	0	0	0	4	0	0	0	0	33	9	43	0	2	0	0	0	0	0	0	0	0	12	3	0	0	0	0	0	0	0	18
OTU_401	Eukaryota	Opisthokonta	Mesomycetozoa	Ichthyosporea	Ichthyosphonida	Abeoformidae_Group_MAIP_2	Abeoformidae_Group_MAIP_2_X	Abeoformidae_Group_MAIP_2_X_sp.	0	0	0	0	0	157	0	0	0	44	2	0	0	0	0	0	0	2	0	0	0	0	0	0	0	0	0	0	0	0	0	0	0	0
OTU_402	Eukaryota	Opisthokonta	Fungi	Basidiomycota	Pucciniomycotina	Cystobasidiomycetes	Sporobolomyces	Sporobolomyces_roseus	0	0	0	0	0	0	0	0	0	0	0	0	0	0	0	66	0	70	0	0	0	0	0	0	111	0	0	0	18	0	0	0	0	0
OTU_405	Eukaryota	Stramenopiles	Ochrophyta	Bacillariophyta	Bacillariophyta_X	Raphid-pennate	Raphid-pennate_X	Raphid-pennate_X_sp.	0	0	0	0	0	0	0	0	0	0	0	0	0	0	0	0	0	0	0	0	0	0	0	0	188	14	0	0	0	0	0	0	0	0
OTU_408	Eukaryota	Alveolata	Dinophyta	Syndiniales	Dino-Group-II	Dino-Group-II-Clade-5	Dino-Group-II-Clade-5_X	Dino-Group-II-Clade-5_X_sp.	0	0	0	0	0	0	0	0	0	0	0	0	2	0	0	0	0	0	0	0	0	0	0	0	0	0	0	0	0	2	6	1	7	0
OTU_409	Eukaryota	Alveolata	Ciliophora	Spirotrichea	Euplotia	Euplotidae	Euplotes	Euplotes_orientalis	0	0	0	0	0	0	0	0	0	0	0	0	0	0	0	0	0	0	0	0	0	0	0	0	0	0	0	150	0	0	0	0	0	0
OTU_410	Eukaryota	Alveolata	Dinophyta	Dinophyceae	Dinophyceae_X	Dinophyceae_XX	Alexandrium	Multi-affiliation	0	0	0	0	0	0	0	0	0	0	0	0	0	0	0	0	0	0	0	0	0	0	0	0	0	202	0	0	0	0	0	0	0	0
OTU_412	Eukaryota	Alveolata	Ciliophora	Spirotrichea	Euplotia	Euplotidae	Euplotes	Euplotes_charon	0	0	0	0	0	0	0	0	0	5	0	0	0	0	0	0	0	191	0	0	0	0	0	0	0	0	0	0	0	0	0	0	0	0
OTU_413	Eukaryota	Alveolata	Dinophyta	Dinophyceae	Dinophyceae_X	Dinophyceae_XX	Gymnodinium	Gymnodinium_nolleri	0	202	0	0	0	0	0	0	0	0	0	0	0	0	0	0	0	0	0	0	0	0	0	0	0	0	0	0	0	0	0	0	0	0
OTU_414	Eukaryota	Excavata	Discoba	Euglenozoa	Euglenida	Petalomonadales	Petalomonadales_X	Petalomonadales_X_sp.	0	0	1	0	0	0	0	0	0	274	0	0	0	0	0	0	0	0	0	0	0	0	0	0	0	0	0	0	0	0	0	0	0	0
OTU_415	Eukaryota	Opisthokonta	Fungi	Basidiomycota	Agaricomycotina	Agaricomycetes	Hyphodontia	Hyphodontia_sp.	0	0	0	0	0	0	0	0	0	0	0	0	0	0	0	0	0	0	0	0	0	0	0	0	0	0	0	0	14	0	0	0	0	0
OTU_416	Eukaryota	Alveolata	Dinophyta	Dinophyceae	Dinophyceae_X	Dinophyceae_XX	Dinophyceae_XXX	Dinophyceae_XXX_sp.	0	0	0	0	0	0	0	0	0	0	0	0	0	0	0	0	0	0	0	0	2	0	0	0	0	0	0	0	0	0	1	0	0	0
OTU_417	Eukaryota	Stramenopiles	Ochrophyta	Xanthophyceae	Xanthophyceae_X	Xanthophyceae_XX	Tribonema	Tribonema_marinum	0	0	0	0	0	0	0	0	0	0	191	0	0	0	0	0	0	0	0	0	0	0	7	0	0	0	0	0	0	0	0	0	0	0
OTU_418	Eukaryota	Opisthokonta	Fungi	Basidiomycota	Pucciniomycotina	Pucciniomycetes	Melampsora	Melampsora_larici-populina	0	0	0	0	0	0	0	0	0	0	0	0	0	0	0	0	0	177	0	0	0	0	0	0	0	0	0	0	0	0	0	0	0	0
OTU_420	Eukaryota	Stramenopiles	Stramenopiles_X	MAST	MAST-3	MAST-3J	MAST-3J_X	MAST-3J_X_sp.	0	0	0	0	0	0	0	0	0	0	0	0	0	0	0	0	0	0	0	0	156	2	0	0	0	0	0	0	0	0	0	0	0	0
OTU_421	Eukaryota	Alveolata	Dinophyta	Dinophyceae	Dinophyceae_X	Dinophyceae_XX	Peridinium	Peridinium_quinquecorne	0	0	0	0	0	0	0	0	0	0	0	0	0	0	25	0	0	0	0	0	0	0	0	46	0	0	0	0	0	0	0	0	0	0
OTU_422	Eukaryota	Alveolata	Ciliophora	Oligohymenophorea	Sessilida	Vorticellidae	Pseudovorticella	Pseudovorticella_punctata	0	0	0	0	0	0	0	0	0	0	0	0	3	0	0	0	0	0	0	0	0	11	0	0	0	0	0	0	0	0	0	169	0	0
OTU_423	Eukaryota	Apusozoa	Hilomonadea	Planomonadida	Planomonadidae	Planomonadidae_Group-1	Multi-affiliation	Multi-affiliation	0	0	0	0	0	0	0	0	0	0	0	0	0	0	0	0	0	0	0	0	0	0	198	0	0	0	0	0	0	0	0	0	0	0
OTU_426	Eukaryota	Stramenopiles	Stramenopiles_X	Oomycota	Oomycota_X	Olpidophydiales	Olpidiopsis	Olpidiopsis_sp.	2	0	0	0	0	0	157	0	0	0	0	0	0	0	0	0	0	0	0	0	0	0	0	0	0	0	15	0	0	0	0	0	0	0
OTU_428	Eukaryota	Stramenopiles	Stramenopiles_X	Bicoecea	Bicoecales	Bicoecaceae	Bicosoeca	Bicosoeca_vacillans	0	0	0	0	172	0	0	0	0	0	0	0	0	0	0	0	0	0	0	0	0	0	69	0	0	0	0	0	0	0	0	0	0	0
OTU_432	Eukaryota	Hacrobia	Haptophyta	Prymnesiophyceae	Calcihaptophycidae	Rhabdosphaeraceae	Algirosphaera	Algirosphaera_robusta	0	0	0	0	0	0	0	0	0	0	0	0	0	0	0	0	0	0	0	0	0	4	0	0	0	0	0	0	0	0	0	0	0	0
OTU_433	Eukaryota	Alveolata	Dinophyta	Dinophyceae	Dinophyceae_X	Dinophyceae_XX	Dinophyceae_XXX	Dinophyceae_XXX_sp.	0	0	0	0	0	0	0	0	0	0	0	0	0	0	0	0	0	0	0	0	0	26	0	0	0	0	0	0	0	140	0	0	0	0
OTU_434	Eukaryota	Alveolata	Dinophyta	Dinophyceae	Suessiales	Suessiales_X	Suessiales_XX	Suessiales_XX_sp.	0	15	11	1	0	2	0	1	6	7	0	3	11	4	0	0	3	1	0	1	6	5	0	0	1	0	0	4	8	11	38	1	14	10
OTU_436	Eukaryota	Opisthokonta	Fungi	Basidiomycota	Pucciniomycotina	Multi-affiliation	Multi-affiliation	Multi-affiliation	2	0	0	0	0	0	0	0	0	0	0	0	0	0	0	0	0	0	0	0	0	0	0	0	0	0	0	0	0	0	0	0	0	0
OTU_438	Eukaryota	Alveolata	Apicomplexa	Apicomplexa_X	Gregarines	Gregarines_X	Gregarinidae	Gregarinidae_sp.	0	0	0	0	0	101	0	0	0	0	0	0	0	0	0	0	0	0	0	0	0	0	0	64	0	0	0	0	0	0	0	0	0	0
OTU_439	Eukaryota	Alveolata	Dinophyta	Dinophyceae	Dinophyceae_X	Dinophyceae_XX	Dinophyceae_XXX	Dinophyceae_XXX_sp.	0	0	0	0	0	0	0	0	0	0	0	0	0	0	0	0	0	0	0	0	0	0	0	0	0	0	6	0	0	0	0	0	0	0
OTU_440	Eukaryota	Opisthokonta	Fungi	Basidiomycota	Agaricomycotina	Agaricomycetes	Multi-affiliation	Multi-affiliation	0	0	0	0	0	0	0	0	0	0	0	0	0	0	0	0	0	0	0	0	0	0	0	0	164	0	0	0	0	0	0	0	0	0
OTU_441	Eukaryota	Opisthokonta	Fungi	Ascomycota	Saccharomycotina	Saccharomycetales	Pichia	Pichia_fermentans	0	0	0	0	0	0	164	0	0	0	0	0	0	0	0	0	0	0	0	0	0	0	0	0	0	0	0	0	0	0	0	0	0	0
OTU_442	Eukaryota	Alveolata	Apicomplexa	Apicomplexa_X	Gregarines	Gregarines_X	Gregarines_XX	Gregarines_XX_sp.	0	0	0	0	126	0	0	0	0	0	0	0	0	0	29	0	0	0	0	0	0	0	0	0	0	0	0	0	0	0	0	0	0	0
OTU_443	Eukaryota	Stramenopiles	Ochrophyta	Bacillariophyta	Bacillariophyta_X	Araphid-pennate	Araphid-pennate_X	Araphid-pennate_X_sp.	0	0	0	0	0	0	27	0	0	0	0	0	0	0	0	0	0	120	0	0	0	0	0	0	12	0	0	0	0	0	0	0	0	0
OTU_444	Eukaryota	Excavata	Discoba	Euglenozoa	Euglenida	Petalomonadales	Petalomonadales_X	Petalomonadales_X_sp.	0	0	0	0	0	0	0	0	0	0	0	0	0	0	0	0	172	0	0	0	0	0	0	0	0	71	7	0	0	0	0	0	0	0
OTU_446	Eukaryota	Opisthokonta	Fungi	Ascomycota	Pezizomycotina	Eurotiomycetes	Multi-affiliation	Multi-affiliation	0	0	0	0	0	0	0	4	0	0	0	0	0	0	3	0	0	3	0	0	0	0	0	0	0	0	15	0	0	0	32	34	61	0
OTU_447	Eukaryota	Rhizaria	Radiolaria	Polycystinea	Spumellarida	Spumellarida-Group-I	Spumellarida-Group-I_X	Spumellarida-Group-I_X_sp.	0	0	0	0	0	0	0	0	0	0	0	0	0	0	0	0	0	0	0	0	0	0	0	0	0	21	0	0	0	0	0	0	0	0
OTU_448	Eukaryota	Opisthokonta	Fungi	Basidiomycota	Agaricomycotina	Agaricomycetes	Trechispora	Trechispora_alnicola	0	0	0	0	0	0	0	0	0	0	0	0	0	0	0	0	0	0	0	0	0	0	0	0	0	0	0	0	231	0	0	0	0	0
OTU_449	Eukaryota	Opisthokonta	Choanoflagellida	Choanoflagellatea	Acanthoecida	Stephanoecidae_Group_I	Stephanoecidae_Group_I_X	Stephanoecidae_Group_I_X_sp.	0	0	0	0	0	0	0	0	0	0	0	0	0	0	29	5	0	0	0	0	0	0	64	0	0	0	0	0	0	0	0	0	0	0
OTU_451	Eukaryota	Archaeplastida	Chlorophyta	Trebouxiophyceae	Trebouxiophyceae_X	Trebouxiophyceae_XX	Botryococcus	Botryococcus_braunii	0	0	0	0	0	0	0	0	0	0	0	0	0	0	0	0	130	0	0	0	0	0	0	0	0	0	0	0	0	0	0	0	0	0
OTU_453	Eukaryota	Alveolata	Dinophyta	Dinophyceae	Dinophyceae_X	Pfiesteriaceae	Stoeckeria	Stoeckeria_algicida	0	0	0	0	1	0	0	97	0	0	0	0	0	0	0	0	0	0	0	0	33	0	0	0	0	0	0	3	0	0	0	0	1	0
OTU_455	Eukaryota	Alveolata	Dinophyta	Syndiniales	Dino-Group-II	Dino-Group-II-Clade-1	Dino-Group-II-Clade-1_X	Dino-Group-II-Clade-1_X_sp.	0	0	0	0	0	0	0	0	0	0	0	0	0	0	0	0	0	0	0	0	0	0	0	0	0	0	0	0	0	0	0	123	0	24
OTU_456	Eukaryota	Alveolata	Dinophyta	Dinophyceae	Dinophyceae_X	Dinophyceae_XX	Multi-affiliation	Multi-affiliation	0	0	0	0	0	0	0	0	0	0	0	0	0	0	0	0	0	0	0	0	0	0	152	0	0	0	0	0	0	0	0	0	0	0
OTU_457	Eukaryota	Alveolata	Ciliophora	Phyllopharyngea	Suctoria	Suctoria_X	Suctoria_XX	Suctoria_XX_sp.	0	50	0	0	0	0	0	0	0	0	0	0	0	0	0	0	0	0	0	0	0	0	0	0	0	0	0	0	0	0	0	0	0	0
OTU_460	Eukaryota	Alveolata	Ciliophora	Multi-affiliation	Multi-affiliation	Multi-affiliation	Multi-affiliation	Multi-affiliation	0	0	0	0	0	0	0	0	0	0	0	0	0	0	0	0	0	0	0	0	0	0	0	0	0	0	0	0	0	0	0	0	0	146
OTU_461	Eukaryota	Opisthokonta	Fungi	Basidiomycota	Agaricomycotina	Agaricomycetes	Multi-affiliation	Multi-affiliation	0	0	0	0	0	0	0	0	0	0	0	0	0	0	0	0	0	0	0	0	0	0	0	0	0	0	0	0	47	0	0	0	0	1
OTU_463	Eukaryota	Opisthokonta	Fungi	Basidiomycota	Agaricomycotina	Agaricomycetes	Hyphodontia	Hyphodontia_crustosa	0	0	0	0	0	0	0	0	0	0	0	0	0	0	0	0	0	0	0	0	0	0	0	0	0	0	0	0	146	0	21	0	0	0
OTU_464	Eukaryota	Alveolata	Ciliophora	Oligohymenophorea	Apostomatia	Foettingeriidae	Foettingeriidae_X	Foettingeriidae_X_sp.	0	0	0	0	0	0	0	0	0	146	0	0	0	0	0	0	0	0	0	0	0	0	0	0	0	0	0	0	0	0	0	0	0	0
OTU_465	Eukaryota	Amoebozoa	Lobosa	Discosea-Flabellinia	Dactylopodida	Paramoebidae	Paramoeba	Paramoeba_eilhardi	0	0	0	0	0	0	0	0	0	0	0	0	0	0	0	0	0	0	0	0	0	149	0	0	0	0	0	0	0	0	0	0	0	0
OTU_466	Eukaryota	Stramenopiles	Ochrophyta	Bacillariophyta	Bacillariophyta_X	Raphid-pennate	Raphid-pennate_X	Raphid-pennate_X_sp.	0	0	0	0	46	0	37	0	0	0	0	0	0	0	0	0	0	0	0	0	0	0	27	0	3	0	0	0	0	0	0	0	0	0
OTU_467	Eukaryota	Stramenopiles	Ochrophyta	Bacillariophyta	Bacillariophyta_X	Multi-affiliation	Multi-affiliation	Multi-affiliation	0	0	0	0	0	0	0	0	0	0	0	0	0	0	1	141	0	3	0	0	0	0	0	2	0	0	0	0	0	0	0	0	0	0
OTU_468	Eukaryota	Alveolata	Dinophyta	Dinophyceae	Dinophyceae_X	Dinophyceae_XX	Gymnodinium	Gymnodinium_dorsalisulcum	0	0	0	0	0	0	0	0	0	0	0	0	0	140	0	0	0	0	0	0	0	0	0	0	0	0	0	0	0	0	0	0	0	0
OTU_472	Eukaryota	Amoebozoa	Lobosa	Tubulinea	Leptomyxida	Flabellulidae	Paraflabellula	Paraflabellula_sp.	0	71	0	0	0	0	0	0	0	77	0	0	0	0	0	0	0	0	0	0	0	0	0	0	0	0	0	0	0	0	0	0	0	0
OTU_473	Eukaryota	Alveolata	Dinophyta	Syndiniales	Dino-Group-II	Dino-Group-II-Clade-5	Dino-Group-II-Clade-5_X	Dino-Group-II-Clade-5_X_sp.	0	0	0	0	0	0	0	0	0	0	0	0	0	0	0	0	0	0	0	1	0	0	0	0	0	0	0	0	0	0	0	0	0	129
OTU_475	Eukaryota	Alveolata	Dinophyta	Syndiniales	Dino-Group-II	Dino-Group-II-Clade-33	Dino-Group-II-Clade-33_X	Dino-Group-II-Clade-33_X_sp._strain2	0	0	0	1	0	0	0	0	0	0	0	0	20	0	0	0	0	0	0	0	0	0	0	0	0	0	0	0	0	0	0	0	0	0
OTU_476	Eukaryota	Apusozoa	Apusomonadidae	Apusomonadidae_Group-2	Apusomonadidae_Group-2B	Apusomonadidae_Group-2B_X	Apusomonadidae_Group-2B_XX	Apusomonadidae_Group-2B_XX_sp.	0	0	0	0	0	0	0	0	0	0	0	0	0	0	0	0	0	2	0	0	0	0	0	0	0	0	0	0	144	0	0	0	0	0
OTU_477	Eukaryota	Stramenopiles	Ochrophyta	Bacillariophyta	Bacillariophyta_X	Raphid-pennate	Nitzschia	Multi-affiliation	0	0	0	0	0	0	0	0	0	0	0	0	0	0	0	0	0	0	0	0	0	0	4	5	0	0	0	0	0	0	0	28	0	0
OTU_481	Eukaryota	Stramenopiles	Stramenopiles_X	MAST	MAST-3	MAST-3J	MAST-3J_X	MAST-3J_X_sp.	0	0	5	0	0	0	0	0	0	0	0	0	0	0	0	0	0	0	0	0	0	0	0	0	0	0	0	0	0	0	0	0	0	0
OTU_482	Eukaryota	Alveolata	Dinophyta	Dinophyceae	Dinophyceae_X	Pfiesteriaceae	Stoeckeria	Stoeckeria_algicida	0	0	33	0	0	0	0	0	0	0	0	0	0	0	0	0	0	0	0	0	4	0	0	0	0	0	0	0	0	0	0	0	0	0
OTU_483	Eukaryota	Multi-affiliation	Multi-affiliation	Multi-affiliation	Multi-affiliation	Multi-affiliation	Multi-affiliation	Multi-affiliation	0	0	67	0	0	0	0	0	0	0	0	0	0	0	0	0	0	0	0	0	0	0	56	11	0	0	0	0	0	0	0	0	0	0
OTU_484	Eukaryota	Rhizaria	Cercozoa	Filosa-Thecofilosea	Ebriida	TAGIRI1-lineage	TAGIRI1-lineage_X	TAGIRI1-lineage_X_sp.	0	0	0	0	0	0	0	0	0	0	30	0	0	0	0	0	0	48	0	0	0	0	0	0	17	42	0	0	0	0	0	0	0	0
OTU_486	Eukaryota	Archaeplastida	Chlorophyta	Ulvophyceae	Ulotrichales	Ulotrichales_X	Capsosiphon	Capsosiphon_groenlandicus	0	0	0	0	0	0	0	71	0	0	0	0	0	0	0	0	0	0	0	0	0	0	32	0	0	0	0	0	0	0	0	0	0	0
OTU_488	Eukaryota	Alveolata	Dinophyta	Syndiniales	Dino-Group-II	Dino-Group-II-Clade-16	Dino-Group-II-Clade-16_X	Dino-Group-II-Clade-16_X_sp.	0	0	4	0	0	0	0	3	3	0	0	8	1	0	0	0	0	0	0	0	0	0	0	0	0	0	0	0	38	0	0	1	68	2
OTU_492	Eukaryota	Alveolata	Apicomplexa	Apicomplexa_X	Apicomplexa_XX	Apicomplexa_XXX	Apicomplexa_XXXX	Apicomplexa_XXXX_sp.	0	0	0	0	0	0	0	0	0	0	0	0	0	0	0	0	0	0	0	0	0	0	0	141	0	0	0	0	0	0	0	0	0	0
OTU_495	Eukaryota	Stramenopiles	Ochrophyta	Bacillariophyta	Bacillariophyta_X	Radial-centric-basal-Coscinodiscophyceae	Multi-affiliation	Multi-affiliation	0	0	0	0	0	0	0	0	0	0	0	0	0	0	141	0	0	0	0	0	0	0	0	0	0	0	0	0	0	0	0	0	0	0
OTU_497	Eukaryota	Excavata	Discoba	Euglenozoa	Euglenida	Petalomonadales	Petalomonas	Petalomonas_cantuscygni	0	0	0	0	0	0	0	0	0	0	0	0	0	0	0	0	0	0	0	0	0	0	0	0	0	129	0	0	0	0	0	0	0	0
OTU_500	Eukaryota	Amoebozoa	Lobosa	Discosea-Flabellinia	Dactylopodida	Paramoebidae	Neoparamoeba	Neoparamoeba_pemaquidensis	0	0	0	0	0	0	0	0	0	0	0	0	0	0	0	0	0	0	0	0	0	136	0	0	0	0	0	0	0	0	0	0	0	0
OTU_503	Eukaryota	Opisthokonta	Fungi	Basidiomycota	Agaricomycotina	Agaricomycetes	Athelia	Athelia_bombacina	0	0	0	0	0	0	0	0	0	0	0	114	0	0	0	0	0	0	0	0	0	0	0	0	0	0	0	0	3	0	0	0	0	0
OTU_504	Eukaryota	Alveolata	Dinophyta	Dinophyceae	Dinophyceae_X	Dinophyceae_XX	Dinophyceae_XXX	Dinophyceae_XXX_sp.	0	0	0	0	0	118	0	0	0	0	0	0	0	0	0	0	0	0	0	0	0	0	0	0	0	0	0	0	0	0	0	0	0	0
OTU_505	Eukaryota	Opisthokonta	Fungi	Chytridiomycota	Chytridiomycotina	Chytridiomycetes	Rhyzophidiales_X	Rhyzophidiales_X_sp.	0	0	0	0	0	0	0	0	0	0	0	0	0	0	0	0	0	0	0	0	0	0	2	0	0	0	0	124	0	0	0	0	0	0
OTU_506	Eukaryota	Apusozoa	Apusomonadidae	Apusomonadidae_Group-2	Apusomonadidae_Group-2B	Apusomonadidae_Group-2B_X	Apusomonadidae_Group-2B_XX	Apusomonadidae_Group-2B_XX_sp.	0	0	0	0	0	0	0	0	0	0	0	0	0	0	0	0	0	0	0	0	0	12	0	0	0	0	0	0	0	0	0	0	0	0
OTU_507	Eukaryota	Stramenopiles	Stramenopiles_X	Labyrinthulea	Labyrinthulales	Labyrinthulaceae	Labyrinthulaceae_X	Labyrinthulaceae_X_sp.	0	0	0	125	0	0	0	0	0	0	0	0	0	0	0	0	0	0	0	0	0	0	0	0	0	0	0	0	0	0	0	0	0	0
OTU_508	Eukaryota	Alveolata	Dinophyta	Syndiniales	Dino-Group-II	Dino-Group-II-Clade-14	Dino-Group-II-Clade-14_X	Dino-Group-II-Clade-14_X_sp._strain3	0	0	0	0	0	0	0	0	7	0	0	0	0	0	0	0	0	0	0	0	0	0	0	0	0	0	0	0	0	0	2	0	112	0
OTU_509	Eukaryota	Alveolata	Ciliophora	Spirotrichea	Euplotia	Aspidiscidae	Aspidisca	Aspidisca_sp.	0	0	0	0	0	0	0	0	111	0	0	0	0	0	0	0	0	0	0	0	0	0	0	0	0	0	0	0	0	0	0	0	0	0
OTU_512	Eukaryota	Alveolata	Ciliophora	Spirotrichea	Euplotia	Euplotidae	Euplotes	Euplotes_parabalteatus	0	0	0	0	0	0	0	0	0	0	0	0	0	0	0	0	0	0	0	0	0	0	0	7	0	0	0	0	0	0	0	0	0	0
OTU_514	Eukaryota	Rhizaria	Cercozoa	Filosa-Thecofilosea	Cryomonadida	Multi-affiliation	Multi-affiliation	Multi-affiliation	0	0	0	0	0	0	0	0	0	0	0	0	0	0	0	0	0	0	0	0	0	0	0	111	0	0	0	0	0	0	0	0	0	0
OTU_515	Eukaryota	Alveolata	Ciliophora	Oligohymenophorea	Sessilida	Vorticellidae	Vorticella	Vorticella_convallaria	0	0	0	0	0	0	0	0	0	0	0	0	0	0	0	0	0	0	0	0	2	0	0	0	0	0	0	0	4	0	0	0	0	0
OTU_523	Eukaryota	Opisthokonta	Fungi	Chytridiomycota	Chytridiomycotina	Chytridiomycetes	Rhizophydium	Rhizophydium_sp.	0	0	0	0	0	0	0	0	0	0	0	0	0	0	0	0	0	0	0	0	111	0	0	0	0	0	0	0	0	0	0	0	0	0
OTU_524	Eukaryota	Alveolata	Ciliophora	Oligohymenophorea	Sessilida	Vorticellidae	Multi-affiliation	Multi-affiliation	0	0	0	0	0	0	0	0	0	0	0	0	0	0	0	0	0	0	0	0	0	0	0	7	0	0	0	4	0	0	0	0	0	0
OTU_525	Eukaryota	Alveolata	Dinophyta	Dinophyceae	Dinophyceae_X	Dinophyceae_XX	Multi-affiliation	Multi-affiliation	5	0	0	0	4	1	2	0	0	4	7	0	0	0	7	0	10	17	4	0	0	1	0	0	6	1	7	0	0	1	0	0	0	0
OTU_526	Eukaryota	Alveolata	Ciliophora	Spirotrichea	Choreotrichia	Strobilidiidae	Strobilidiidae_X	Strobilidiidae_X_sp.	3	0	0	0	0	0	3	0	0	0	0	0	0	0	0	0	0	0	0	0	0	0	0	0	0	0	113	0	0	0	0	0	0	0
OTU_527	Eukaryota	Stramenopiles	Stramenopiles_X	MAST	MAST-6	MAST-6_X	MAST-6_XX	MAST-6_XX_sp.	0	0	0	0	0	0	0	0	0	0	0	0	0	0	0	0	0	0	0	0	0	0	0	0	0	0	0	0	0	0	0	1	0	0
OTU_528	Eukaryota	Excavata	Discoba	Euglenozoa	Kinetoplastida	Prokinetoplastidae	Prokinetoplastidae_X	Prokinetoplastidae_X_sp.	0	0	0	0	0	0	0	0	0	0	0	0	0	0	0	0	0	12	0	0	43	0	0	0	0	0	0	0	0	0	0	0	0	0
OTU_529	Eukaryota	Stramenopiles	Stramenopiles_X	Labyrinthulea	Labyrinthulales	Labyrinthulaceae	Multi-affiliation	Multi-affiliation	0	0	0	0	0	0	0	0	0	0	0	0	0	0	86	0	12	0	0	0	0	0	0	4	7	0	0	0	0	0	0	0	0	0
OTU_531	Eukaryota	Alveolata	Dinophyta	Dinophyceae	Dinophyceae_X	Dinophyceae_XX	Dinophyceae_XXX	Dinophyceae_XXX_sp.	0	2	6	4	0	0	0	5	1	0	0	2	2	1	0	0	0	0	0	5	8	3	0	0	0	0	0	1	11	18	10	5	9	1
OTU_532	Eukaryota	Opisthokonta	Choanoflagellida	Choanoflagellatea	Acanthoecida	Stephanoecidae_Group_I	Stephanoeca_Group_I	Stephanoeca_diplocostata	0	0	0	0	0	0	0	0	0	0	0	0	0	0	0	0	0	0	0	0	0	26	0	0	0	0	0	73	0	0	0	0	0	0
OTU_534	Eukaryota	Archaeplastida	Chlorophyta	Ulvophyceae	Ulotrichales	Ulotrichales_X	Multi-affiliation	Multi-affiliation	0	0	0	0	0	0	0	0	0	0	0	0	0	0	0	0	0	0	0	0	0	19	0	0	0	0	0	0	0	0	0	0	0	0
OTU_536	Eukaryota	Opisthokonta	Fungi	Chytridiomycota	Chytridiomycotina	Chytridiomycetes	Rhyzophidiales_X	Rhyzophidiales_X_sp.	0	0	0	0	0	0	0	0	0	0	0	0	0	0	0	0	0	0	0	0	0	0	1	0	0	0	0	0	4	0	0	0	0	0
OTU_537	Eukaryota	Stramenopiles	Ochrophyta	Bacillariophyta	Bacillariophyta_X	Polar-centric-Mediophyceae	Chaetoceros	Chaetoceros_calcitrans	0	0	0	0	0	0	0	0	0	0	0	0	0	0	0	0	0	0	0	0	0	2	0	0	0	0	0	0	0	0	0	0	0	0
OTU_541	Eukaryota	Opisthokonta	Mesomycetozoa	Ichthyosporea	Ichthyosphonida	Ichthyosphonida_X	Ichthyosphonida_XX	Ichthyosphonida_XX_sp.	0	0	0	0	0	45	0	0	0	0	0	0	0	0	0	0	0	69	1	0	0	0	0	0	0	0	0	0	0	0	0	0	0	0
OTU_542	Eukaryota	Stramenopiles	Stramenopiles_X	Labyrinthulea	Labyrinthulales	Labyrinthulaceae	Labyrinthula	Labyrinthula_sp.	0	0	0	0	0	0	0	0	0	0	0	0	0	0	0	0	0	0	0	0	0	0	1	0	0	0	0	0	0	0	0	0	0	0
OTU_545	Eukaryota	Rhizaria	Cercozoa	Filosa-Granofilosea	Filosa-Granofilosea_X	Massiteriidae	Massisteria	Massisteria_sp.	0	0	0	0	0	0	0	0	0	0	0	0	0	0	0	0	0	0	0	0	0	0	95	0	0	0	0	0	0	0	0	0	0	0
OTU_546	Eukaryota	Stramenopiles	Stramenopiles_X	Oomycota	Oomycota_X	Haptoglossales	Haptoglossa	Haptoglossa_sp.	0	0	0	0	0	0	0	0	0	0	0	3	0	0	0	0	0	0	0	0	0	0	0	0	0	0	0	0	0	0	0	0	0	0
OTU_548	Eukaryota	Archaeplastida	Chlorophyta	Multi-affiliation	Multi-affiliation	Multi-affiliation	Multi-affiliation	Multi-affiliation	3	0	0	0	22	0	0	0	0	1	0	0	0	0	6	9	0	0	0	0	0	0	13	12	7	2	1	0	0	0	0	0	0	0
OTU_551	Eukaryota	Archaeplastida	Chlorophyta	Multi-affiliation	Multi-affiliation	Multi-affiliation	Multi-affiliation	Multi-affiliation	0	0	0	0	0	0	0	0	0	0	0	0	0	0	0	0	0	0	0	0	0	0	0	96	0	0	0	0	0	0	0	0	0	0
OTU_552	Eukaryota	Alveolata	Multi-affiliation	Multi-affiliation	Multi-affiliation	Multi-affiliation	Multi-affiliation	Multi-affiliation	0	0	0	0	0	0	0	0	92	0	0	0	0	0	0	0	0	0	0	0	0	0	0	0	0	0	0	0	0	0	2	0	0	0
OTU_554	Eukaryota	Rhizaria	Cercozoa	Filosa-Thecofilosea	Cryomonadida	Cryothecomonas-lineage	Cryothecomonas	Cryothecomonas_sp.	0	0	0	0	0	0	0	0	0	0	0	0	0	0	0	0	0	0	0	0	0	0	0	0	0	0	0	0	0	0	7	0	0	28
OTU_556	Eukaryota	Alveolata	Dinophyta	Dinophyceae	Dinophyceae_X	Dinophyceae_XX	Protoperidinium	Protoperidinium_americanum	4	0	0	0	0	0	0	0	0	6	0	0	0	0	0	0	5	0	0	0	4	0	0	0	0	37	0	0	0	0	0	0	30	0
OTU_557	Eukaryota	Rhizaria	Cercozoa	Filosa-Thecofilosea	Multi-affiliation	Multi-affiliation	Multi-affiliation	Multi-affiliation	0	0	0	0	0	0	0	0	79	0	0	0	0	0	0	0	0	0	0	0	0	0	0	0	0	0	0	0	0	0	0	0	0	0
OTU_560	Eukaryota	Stramenopiles	Ochrophyta	Bacillariophyta	Bacillariophyta_X	Araphid-pennate	Multi-affiliation	Multi-affiliation	0	0	0	0	0	0	0	0	0	0	0	0	0	0	88	0	0	0	0	0	0	0	0	0	0	0	0	0	0	0	0	0	0	0
OTU_561	Eukaryota	Alveolata	Dinophyta	Dinophyceae	Dinophyceae_X	Dinophyceae_XX	Multi-affiliation	Multi-affiliation	0	0	0	0	0	0	0	0	0	0	0	0	0	0	89	0	0	0	0	0	0	0	0	0	0	0	0	0	0	0	0	0	0	0
OTU_562	Eukaryota	Alveolata	Ciliophora	Phyllopharyngea	Suctoria	Suctoria_X	Suctoria_XX	Suctoria_XX_sp.	0	0	0	0	0	0	0	0	0	0	0	0	0	0	0	0	0	0	0	0	0	0	0	0	86	0	0	0	0	0	0	0	0	0
OTU_563	Eukaryota	Opisthokonta	Fungi	Basidiomycota	Agaricomycotina	Agaricomycetes	Agaricomycetes_X	Agaricomycetes_X_sp.	0	0	0	0	0	0	0	0	0	0	0	0	0	0	0	0	0	0	0	0	0	0	0	0	0	0	0	0	88	0	0	0	0	0
OTU_564	Eukaryota	Rhizaria	Cercozoa	Filosa-Imbricatea	Thaumatomonadida	Thaumatomonadida_X	Thaumatomonadida_XX	Thaumatomonadida_XX_sp.	0	0	0	0	0	0	0	0	0	0	0	0	0	0	0	0	0	0	0	18	0	8	0	0	0	0	0	0	0	0	0	1	0	0
OTU_565	Eukaryota	Stramenopiles	Ochrophyta	Bacillariophyta	Bacillariophyta_X	Polar-centric-Mediophyceae	Multi-affiliation	Multi-affiliation	1	0	0	0	0	61	0	0	0	0	0	0	0	0	0	0	0	5	12	0	0	0	0	0	0	1	6	0	0	0	0	0	0	0
OTU_566	Eukaryota	Rhizaria	Cercozoa	Filosa-Imbricatea	Filosa-Imbricatea_X	Novel-clade-2	Novel-clade-2_X	Multi-affiliation	0	0	0	0	82	0	0	0	0	0	0	0	0	0	0	0	0	0	0	0	0	0	0	0	0	0	0	0	0	0	0	0	0	0
OTU_570	Eukaryota	Apusozoa	Apusomonadidae	Apusomonadidae_Group-2	Apusomonadidae_Group-2B	Apusomonadidae_Group-2B_X	Apusomonadidae_Group-2B_XX	Apusomonadidae_Group-2B_XX_sp.	0	0	0	0	0	0	0	0	0	0	0	0	0	5	0	0	0	0	0	0	0	0	0	0	0	0	0	2	0	0	0	0	0	0
OTU_572	Eukaryota	Alveolata	Dinophyta	Dinophyceae	Dinophyceae_X	Dinophyceae_XX	Warnowia	Warnowia_sp.	0	0	0	0	0	0	0	0	0	0	0	0	0	0	0	0	0	0	0	0	0	0	0	0	3	0	0	0	0	0	0	0	0	0
OTU_573	Eukaryota	Alveolata	Dinophyta	Dinophyceae	Dinophyceae_X	Dinophyceae_XX	Protoperidinium	Protoperidinium_bipes	2	0	0	0	0	4	0	0	0	1	0	0	0	0	0	0	0	3	0	32	0	0	0	0	9	0	17	2	0	0	1	0	2	0
OTU_575	Eukaryota	Alveolata	Apicomplexa	Apicomplexa_X	Colpodellidae	Colpodellidae_X	Colpodella	Colpodella_sp.	0	0	0	0	0	0	0	0	0	0	0	85	0	0	0	0	0	0	0	0	0	0	0	0	0	0	0	0	0	0	0	0	0	0
OTU_576	Eukaryota	Alveolata	Dinophyta	Dinophyceae	Dinophyceae_X	Dinophyceae_XX	Prorocentrum	Prorocentrum_triestinum	0	0	0	0	0	0	0	0	0	0	0	0	0	0	0	0	0	0	55	0	0	0	0	0	0	30	0	0	0	0	0	0	0	0
OTU_579	Eukaryota	Archaeplastida	Chlorophyta	Pyramimonadales	Pyramimonadales_X	Pyramimonadales_XX	Pyramimonas	Pyramimonas_aurea	39	0	0	0	0	0	0	0	0	0	0	0	0	0	0	0	0	0	0	0	0	0	0	0	0	0	0	0	2	0	0	0	0	0
OTU_580	Eukaryota	Stramenopiles	Stramenopiles_X	MAST	MAST-3	MAST-3J	MAST-3J_X	MAST-3J_X_sp.	0	0	0	0	0	0	0	0	0	0	0	0	0	0	0	0	0	0	0	0	0	0	0	0	0	0	0	1	0	0	0	0	0	0
OTU_581	Eukaryota	Excavata	Discoba	Euglenozoa	Euglenida	Petalomonadales	Petalomonadales_X	Petalomonadales_X_sp.	0	0	0	0	0	0	85	0	0	0	0	0	0	0	0	0	0	0	0	0	0	0	0	0	0	0	0	0	0	0	0	0	0	0
OTU_583	Eukaryota	Rhizaria	Cercozoa	Filosa-Granofilosea	Filosa-Granofilosea_X	Novel-Gran-234	Novel-Gran-234_X	Novel-Gran-234_X_sp.	0	9	2	0	0	0	0	6	0	0	0	0	0	0	0	0	0	0	0	0	0	13	0	0	0	0	0	0	0	0	0	0	0	0
OTU_584	Eukaryota	Alveolata	Apicomplexa	Apicomplexa_X	Gregarines	Gregarines_X	Gregarinidae	Gregarinidae_sp.	0	0	0	0	0	0	0	0	0	0	0	0	0	0	82	0	0	0	0	0	0	0	0	0	0	0	0	0	0	0	0	0	0	0
OTU_586	Eukaryota	Alveolata	Dinophyta	Dinophyceae	Dinophyceae_X	Dinophyceae_XX	Azadinium	Azadinium_cuneatum	0	0	0	0	0	0	0	0	0	0	0	0	0	0	0	84	0	0	0	0	0	0	0	0	0	0	0	0	0	0	0	0	0	0
OTU_587	Eukaryota	Opisthokonta	Fungi	Chytridiomycota	Chytridiomycotina	Neocallimastigomycetes	Cyllamyces	Cyllamyces_aberensis	0	0	0	0	0	0	0	0	0	0	0	0	0	0	0	0	0	0	0	0	0	0	78	0	0	0	0	0	0	0	0	0	0	0
OTU_588	Eukaryota	Alveolata	Ciliophora	Phyllopharyngea	Phyllopharyngea_X	Phyllopharyngea_XX	Phyllopharyngea_XXX	Phyllopharyngea_XXX_sp.	0	0	1	0	0	0	6	0	0	0	0	0	0	0	0	0	0	0	0	0	0	0	0	0	0	0	0	0	0	0	0	0	0	0
OTU_589	Eukaryota	Alveolata	Ciliophora	Phyllopharyngea	Phyllopharyngea_X	Phyllopharyngea_XX	Phyllopharyngea_XXX	Phyllopharyngea_XXX_sp.	0	0	1	2	0	0	0	0	0	1	0	4	0	56	0	0	0	0	0	0	0	0	0	0	0	0	0	0	0	0	0	0	0	0
OTU_591	Eukaryota	Alveolata	Dinophyta	Dinophyceae	Dinophyceae_X	Dinophyceae_XX	Peridinium	Peridinium_balticum	0	0	78	0	0	1	0	0	0	0	0	0	0	0	0	0	0	0	0	0	0	0	0	0	0	0	0	0	0	0	0	0	0	0
OTU_592	Eukaryota	Alveolata	Dinophyta	Dinophyceae	Dinophyceae_X	Dinophyceae_XX	Dinophyceae_XXX	Dinophyceae_XXX_sp.	0	0	0	0	0	0	0	0	0	0	0	0	0	0	0	0	0	0	0	0	0	0	0	0	84	0	0	0	0	0	0	0	0	0
OTU_593	Eukaryota	Amoebozoa	Lobosa	Discosea-Flabellinia	Dactylopodida	Paramoebidae	Neoparamoeba	Neoparamoeba_pemaquidensis	0	0	0	0	0	0	0	0	0	0	0	0	0	0	0	0	0	0	0	0	20	56	0	0	0	0	0	0	0	0	0	0	0	0
OTU_594	Eukaryota	Amoebozoa	Lobosa	Discosea-Flabellinia	Dactylopodida	Paramoebidae	Neoparamoeba	Neoparamoeba_pemaquidensis	0	0	0	0	0	0	0	0	0	0	0	0	0	0	0	0	0	0	0	0	3	77	0	0	0	0	0	0	0	0	0	0	0	0
OTU_596	Eukaryota	Alveolata	Dinophyta	Dinophyceae	Suessiales	Suessiales_X	Suessiales_XX	Suessiales_XX_sp.	0	0	0	0	0	0	0	0	0	0	0	0	2	77	0	0	0	0	0	0	0	0	0	0	0	0	0	0	0	0	0	0	0	0
OTU_597	Eukaryota	Alveolata	Ciliophora	Oligohymenophorea	Peritrichia	Zoothamniidae	Multi-affiliation	Multi-affiliation	0	0	0	0	0	0	0	0	0	0	0	0	0	0	0	0	0	0	0	0	0	0	0	0	0	0	0	0	15	0	0	0	0	0
OTU_599	Eukaryota	Alveolata	Apicomplexa	Apicomplexa_X	Apicomplexa_XX	Apicomplexa_XXX	Apicomplexa_XXXX	Apicomplexa_XXXX_sp.	0	0	0	0	0	0	0	0	0	0	0	0	0	0	0	0	0	0	0	0	0	0	79	0	0	0	0	0	0	0	0	0	0	0
OTU_601	Eukaryota	Alveolata	Ciliophora	Phyllopharyngea	Suctoria	Acinetidae	Acineta	Acineta_sp.	0	0	0	0	0	0	0	0	0	0	0	0	0	0	0	0	0	0	0	0	0	0	0	0	0	0	0	0	14	0	0	0	0	0
OTU_603	Eukaryota	Opisthokonta	Fungi	Chytridiomycota	Chytridiomycotina	Monoblepharidomycetes	Monoblepharella	Monoblepharella_sp.	0	0	0	0	0	0	0	0	0	0	0	0	0	0	0	0	0	0	0	0	0	0	0	44	0	0	0	0	0	0	0	0	0	0
OTU_604	Eukaryota	Alveolata	Ciliophora	Spirotrichea	Choreotrichia	Strobilidiidae	Pelagostrobilidium	Pelagostrobilidium_sp.	0	0	0	0	3	0	0	0	0	0	0	0	0	0	0	0	0	0	0	0	0	0	0	0	0	0	0	0	0	0	0	0	0	0
OTU_607	Eukaryota	Alveolata	Dinophyta	Dinophyceae	Suessiales	Suessiales_X	Multi-affiliation	Multi-affiliation	0	0	0	0	0	0	0	0	0	0	0	0	0	0	0	0	0	0	0	0	0	0	0	0	0	0	0	0	0	0	0	8	0	0
OTU_608	Eukaryota	Archaeplastida	Chlorophyta	Chlorophyceae	Sphaeropleales	Sphaeropleales_X	Multi-affiliation	Multi-affiliation	0	0	0	0	0	0	0	0	0	0	0	0	0	0	0	0	0	0	0	0	0	0	0	5	0	0	0	0	0	0	0	0	0	0
OTU_619	Eukaryota	Opisthokonta	Fungi	Fungi_X	Fungi_XX	Fungi_XXX	Fungi_XXXX	Fungi_XXXX_sp.	0	0	0	0	0	0	0	0	0	0	0	0	0	0	0	0	0	0	0	0	0	0	0	0	0	11	0	0	0	0	0	0	0	0
OTU_621	Eukaryota	Stramenopiles	Stramenopiles_X	Stramenopiles_XX	Stramenopiles_XXX	Stramenopiles_XXXX	Stramenopiles_XXXXX	Stramenopiles_XXXXX_sp.	0	0	0	0	0	0	3	0	0	0	0	0	0	0	0	0	0	0	0	0	0	0	0	0	0	0	0	0	0	0	0	0	0	0
OTU_623	Eukaryota	Opisthokonta	Fungi	Basidiomycota	Ustilaginomycotina	Exobasidiomycetes	Multi-affiliation	Multi-affiliation	0	0	0	0	0	0	0	0	0	0	0	0	0	0	0	0	0	0	2	0	2	0	6	0	0	0	0	0	0	0	0	0	0	0
OTU_624	Eukaryota	Opisthokonta	Mesomycetozoa	Ichthyosporea	Ichthyosphonida	Ichthyosphonida_X	Ichthyosphonida_XX	Ichthyosphonida_XX_sp.	0	0	0	0	2	0	0	0	0	0	0	0	0	0	0	0	0	0	0	0	0	0	0	9	0	0	0	0	0	0	0	0	0	0
OTU_625	Eukaryota	Stramenopiles	Stramenopiles_X	Bicoecea	Bicoecales	Bicoecaceae	Bicosoeca	Bicosoeca_sp._strain1	0	0	0	0	0	0	0	0	0	0	0	0	0	0	0	0	0	0	0	0	0	0	0	0	0	0	0	0	3	0	0	0	0	0
OTU_626	Eukaryota	Alveolata	Dinophyta	Dinophyceae	Dinophyceae_X	Dinophyceae_XX	Dinophyceae_XXX	Dinophyceae_XXX_sp.	0	0	0	0	7	0	0	0	0	0	0	0	0	0	4	12	0	0	0	0	0	0	1	12	0	0	0	0	0	0	0	0	0	0
OTU_627	Eukaryota	Stramenopiles	Ochrophyta	Bacillariophyta	Bacillariophyta_X	Radial-centric-basal-Coscinodiscophyceae	Rhizosolenia	Multi-affiliation	0	0	0	0	0	22	0	0	0	0	0	0	0	0	0	0	7	0	0	0	0	0	0	0	26	0	2	0	0	0	0	0	0	0
OTU_629	Eukaryota	Archaeplastida	Chlorophyta	Ulvophyceae	Ulvales-relatives	Ulvales-relatives_X	Ulva	Ulva_reticulata	0	0	0	0	0	0	0	0	0	0	0	0	0	0	0	0	0	0	0	0	0	0	0	68	0	0	0	0	0	0	0	0	0	0
OTU_630	Eukaryota	Multi-affiliation	Multi-affiliation	Multi-affiliation	Multi-affiliation	Multi-affiliation	Multi-affiliation	Multi-affiliation	0	0	0	0	0	0	0	0	0	0	0	0	0	0	0	0	66	0	0	0	0	0	0	0	0	0	0	0	0	0	0	0	0	0
OTU_631	Eukaryota	Multi-affiliation	Multi-affiliation	Multi-affiliation	Multi-affiliation	Multi-affiliation	Multi-affiliation	Multi-affiliation	0	0	0	0	0	0	0	0	0	0	0	0	0	0	0	0	1	0	0	0	1	0	0	0	0	3	2	2	0	0	0	0	0	0
OTU_632	Eukaryota	Alveolata	Dinophyta	Dinophyceae	Suessiales	Suessiales_X	Polarella	Polarella_glacialis	0	1	2	0	0	0	0	3	9	0	0	0	1	0	0	0	0	0	0	0	9	1	0	0	0	0	0	1	13	8	0	1	7	0
OTU_636	Eukaryota	Alveolata	Ciliophora	Oligohymenophorea	Sessilida	Vorticellidae	Multi-affiliation	Multi-affiliation	64	0	0	0	0	0	0	0	0	0	0	0	0	0	0	0	0	0	0	0	0	0	0	0	0	0	0	0	0	0	0	0	0	0
OTU_637	Eukaryota	Rhizaria	Cercozoa	Endomyxa	Novel-clade-9	Novel-clade-9_X	Novel-clade-9_XX	Novel-clade-9_XX_sp.	0	0	0	0	0	0	0	0	0	0	0	0	0	0	0	0	0	0	0	0	0	0	47	0	0	0	0	0	0	0	0	0	0	0
OTU_639	Eukaryota	Opisthokonta	Fungi	Basidiomycota	Pucciniomycotina	Pucciniomycetes	Kuehneola	Kuehneola_uredinis	64	0	0	0	0	0	0	0	0	0	0	0	0	0	0	0	0	0	0	0	0	0	0	0	0	0	0	0	0	0	0	0	0	0
OTU_640	Eukaryota	Opisthokonta	Fungi	Basidiomycota	Agaricomycotina	Agaricomycetes	Hyphodontia	Hyphodontia_sp.	0	0	0	0	0	0	0	0	0	0	0	0	0	0	0	0	0	0	0	0	0	0	0	0	0	0	0	0	61	0	0	0	0	0
OTU_641	Eukaryota	Alveolata	Dinophyta	Dinophyceae	Dinophyceae_X	Dinophyceae_XX	Heterocapsa	Heterocapsa_triquetra	0	0	0	0	0	0	0	0	0	0	0	0	0	0	0	0	0	0	0	0	0	0	0	0	0	0	0	61	0	0	0	0	0	0
OTU_642	Eukaryota	Stramenopiles	Ochrophyta	Bacillariophyta	Bacillariophyta_X	Raphid-pennate	Multi-affiliation	Multi-affiliation	0	0	0	0	0	0	0	0	0	0	0	0	0	0	0	0	0	0	0	0	0	0	2	20	0	0	0	0	0	0	0	0	0	0
OTU_644	Eukaryota	Alveolata	Dinophyta	Dinophyceae	Dinophyceae_X	Dinophyceae_XX	Multi-affiliation	Multi-affiliation	60	0	0	0	0	0	0	0	0	0	0	0	0	0	0	0	0	0	0	0	0	0	0	0	0	0	0	0	0	0	0	0	0	0
OTU_645	Eukaryota	Stramenopiles	Stramenopiles_X	Labyrinthulea	Labyrinthulales	Labyrinthulaceae	Aplanochytrium	Aplanochytrium_kerguelense	0	0	2	0	0	0	0	0	0	0	0	0	0	0	0	0	0	0	0	0	0	0	31	0	0	0	0	0	0	0	0	0	1	0
OTU_650	Eukaryota	Opisthokonta	Fungi	Basidiomycota	Agaricomycotina	Agaricomycetes	Multi-affiliation	Multi-affiliation	0	0	0	0	0	0	0	0	0	0	0	0	0	0	0	0	0	0	0	0	0	0	0	0	0	0	0	0	59	0	0	0	0	0
OTU_651	Eukaryota	Alveolata	Dinophyta	Dinophyceae	Suessiales	Suessiales_X	Woloszynskia	Woloszynskia_cincta	0	0	0	0	0	0	0	0	0	0	0	0	0	0	0	0	0	0	0	0	0	0	0	0	0	0	0	0	0	59	0	0	0	0
OTU_652	Eukaryota	Alveolata	Ciliophora	Spirotrichea	Hypotrichia	Epiclintidae	Epiclintes	Epiclintes_auricularis	0	0	0	0	60	0	0	0	0	0	0	0	0	0	0	0	0	0	0	0	0	0	0	0	0	0	0	0	0	0	0	0	0	0
OTU_653	Eukaryota	Opisthokonta	Fungi	Basidiomycota	Agaricomycotina	Agaricomycetes	Auricularia	Multi-affiliation	0	0	0	0	0	0	0	0	0	0	0	0	0	0	0	0	0	0	0	0	0	0	0	0	0	0	0	0	61	0	0	0	0	0
OTU_654	Eukaryota	Opisthokonta	Fungi	Ascomycota	Pezizomycotina	Eurotiomycetes	Multi-affiliation	Multi-affiliation	0	0	0	0	0	0	0	0	0	0	0	0	0	0	0	0	0	0	0	0	0	0	0	0	42	0	0	0	0	0	0	0	0	0
OTU_655	Eukaryota	Alveolata	Dinophyta	Dinophyceae	Suessiales	Suessiales_X	Symbiodinium	Symbiodinium_sp.	0	0	0	1	0	0	0	2	1	1	0	1	0	0	0	0	0	0	0	0	0	0	0	0	3	0	0	0	3	2	0	0	0	0
OTU_658	Eukaryota	Multi-affiliation	Multi-affiliation	Multi-affiliation	Multi-affiliation	Multi-affiliation	Multi-affiliation	Multi-affiliation	0	1	2	0	0	0	0	0	0	0	0	1	1	0	0	0	0	0	0	3	5	0	0	0	0	0	0	0	0	6	0	0	0	3
OTU_660	Eukaryota	Excavata	Discoba	Euglenozoa	Euglenida	Petalomonadales	Petalomonadales_X	Petalomonadales_X_sp.	59	0	0	0	0	0	0	0	0	0	0	0	0	0	0	0	0	0	0	0	0	0	0	0	0	0	0	0	0	0	0	0	0	0
OTU_665	Eukaryota	Alveolata	Apicomplexa	Apicomplexa_X	Colpodellidae	Colpodellidae_X	Colpodella	Colpodella_tetrahymenae	0	0	0	0	0	0	0	0	0	0	0	0	0	0	0	0	0	58	0	0	0	0	0	0	0	0	0	0	0	0	0	0	0	0
OTU_666	Eukaryota	Rhizaria	Cercozoa	Endomyxa-Ascetosporea	Paradinida	Paradinidae	Paradinium	Paradinium_poucheti	0	0	0	0	0	0	0	0	0	0	0	0	0	0	53	0	0	0	0	0	0	0	0	0	0	0	0	0	0	0	0	0	0	0
OTU_669	Eukaryota	Opisthokonta	Choanoflagellida	Choanoflagellatea	Craspedida	Monosigidae_Group_M	Salpingoeca_M	Salpingoeca_urceolata	0	0	0	0	0	0	0	0	0	0	0	0	0	0	0	0	0	0	0	0	0	0	26	0	0	0	0	0	0	0	0	0	0	0
OTU_671	Eukaryota	Rhizaria	Cercozoa	Filosa-Thecofilosea	Ventricleftida	Ventricleftida_X	Ventricleftida_XX	Ventricleftida_XX_sp.	0	0	0	0	0	0	0	0	0	59	0	0	0	0	0	0	0	0	0	0	0	0	0	0	0	0	0	0	0	0	0	0	0	0
OTU_672	Eukaryota	Alveolata	Apicomplexa	Apicomplexa_X	Gregarines	Gregarines_X	Gregarinidae	Gregarinidae_sp.	0	0	0	0	0	0	0	0	0	0	0	0	0	48	0	0	0	0	0	0	0	0	0	0	0	0	0	0	0	0	0	0	0	0
OTU_673	Eukaryota	Alveolata	Dinophyta	Dinophyceae	Dinophyceae_X	Dinophyceae_XX	Prorocentrum	Prorocentrum_micans	0	0	0	0	0	0	0	0	0	0	0	0	0	0	0	0	0	0	0	0	0	0	53	0	0	0	0	0	0	0	0	0	0	0
OTU_677	Eukaryota	Stramenopiles	Ochrophyta	Bacillariophyta	Bacillariophyta_X	Araphid-pennate	Licmophora	Licmophora_flabellata	0	0	0	0	0	0	0	0	0	55	0	0	0	0	0	0	0	0	0	0	0	0	0	0	0	0	0	0	0	0	0	0	0	0
OTU_679	Eukaryota	Opisthokonta	Fungi	Basidiomycota	Agaricomycotina	Agaricomycetes	Auricularia	Multi-affiliation	0	0	0	0	0	0	0	0	0	0	0	0	0	0	0	0	0	0	0	0	0	0	0	0	0	0	0	0	51	0	0	0	0	0
OTU_680	Eukaryota	Stramenopiles	Stramenopiles_X	Bicoecea	Anoecales	Caecitellaceae	Caecitellus	Caecitellus_parvulus	0	0	0	0	0	0	0	0	0	0	0	0	0	0	0	0	0	0	0	0	0	0	0	0	0	56	0	0	0	0	0	0	0	0
OTU_681	Eukaryota	Alveolata	Dinophyta	Dinophyceae	Suessiales	Suessiales_X	Suessiales_XX	Suessiales_XX_sp.	0	0	0	0	0	0	0	0	0	0	0	0	0	0	0	0	0	0	0	0	0	0	0	0	0	0	0	0	0	0	51	0	0	0
OTU_682	Eukaryota	Alveolata	Apicomplexa	Apicomplexa_X	Gregarines	Gregarines_X	Gregarinidae	Gregarinidae_sp.	0	0	0	0	0	54	0	0	0	0	0	0	0	0	0	0	6	0	0	0	0	0	0	0	0	0	0	0	0	0	0	0	0	0
OTU_683	Eukaryota	Alveolata	Dinophyta	Dinophyceae	Dinophyceae_X	Dinophyceae_XX	Dinophyceae_XXX	Dinophyceae_XXX_sp.	0	0	0	0	0	0	0	0	0	0	0	0	0	0	0	57	0	0	0	0	0	0	0	0	0	0	0	0	0	0	0	0	0	0
OTU_684	Eukaryota	Amoebozoa	Lobosa	Discosea-Flabellinia	Discosea-Flabellinia_X	Pessonella-lineage	Pessonella	Pessonella_sp.	0	0	0	0	0	0	0	0	0	0	0	0	0	0	0	0	0	0	0	0	0	20	0	0	0	0	0	0	0	0	0	0	0	0
OTU_685	Eukaryota	Rhizaria	Cercozoa	Filosa-Thecofilosea	Cryomonadida	Cryomonadida_X	Cryomonadida_XX	Cryomonadida_XX_sp.	0	0	0	0	0	0	0	0	0	0	52	0	0	0	0	0	0	0	0	0	0	0	0	0	0	0	0	0	0	0	0	0	0	0
OTU_687	Eukaryota	Alveolata	Dinophyta	Dinophyceae	Dinophyceae_X	Dinophyceae_XX	Protoperidinium	Protoperidinium_claudicans	0	0	0	0	0	52	0	0	0	0	0	0	0	0	0	0	0	0	0	0	0	0	0	0	0	0	0	0	0	0	0	0	0	0
OTU_688	Eukaryota	Rhizaria	Cercozoa	Filosa-Thecofilosea	Tectofilosida	Pseudodifflugiidae	Pseudodifflugiidae_X	Pseudodifflugiidae_X_sp.	0	0	0	0	51	0	0	0	0	0	0	0	0	0	0	0	0	0	0	0	0	0	0	0	0	0	0	0	0	0	0	0	0	0
OTU_689	Eukaryota	Opisthokonta	Fungi	Basidiomycota	Agaricomycotina	Agaricomycetes	Hyphodontia	Hyphodontia_rimosissima	0	0	0	0	0	0	0	0	0	0	0	0	0	0	0	0	0	0	0	0	0	0	0	0	0	0	0	0	50	0	0	0	0	0
OTU_690	Eukaryota	Alveolata	Apicomplexa	Apicomplexa_X	Gregarines	Gregarines_X	Gregarinidae	Gregarinidae_sp.	0	0	0	0	0	0	0	0	0	0	0	0	0	0	0	0	0	0	0	0	0	0	0	0	52	0	0	0	0	0	0	0	0	0
OTU_693	Eukaryota	Amoebozoa	Lobosa	Discosea-Flabellinia	Dactylopodida	Paramoebidae	Neoparamoeba	Neoparamoeba_pemaquidensis	0	0	0	0	0	0	0	0	0	0	0	0	0	0	0	0	0	0	0	0	6	45	0	0	0	0	0	0	0	0	0	0	0	0
OTU_696	Eukaryota	Alveolata	Dinophyta	Dinophyceae	Dinophyceae_X	Dinophyceae_XX	Multi-affiliation	Multi-affiliation	0	0	0	0	0	0	0	0	0	0	0	0	0	0	0	0	0	0	0	0	0	0	0	0	0	46	0	0	0	0	0	0	0	0
OTU_700	Eukaryota	Stramenopiles	Stramenopiles_X	Labyrinthulea	Thraustochytriales	Thraustochytriaceae	Schizochytrium	Schizochytrium_aggregatum	0	0	0	0	14	0	18	0	0	0	0	0	0	0	0	0	0	0	0	0	0	0	0	33	0	0	0	0	0	0	0	0	0	0
OTU_701	Eukaryota	Opisthokonta	Fungi	Ascomycota	Pezizomycotina	Dothideomycetes	Multi-affiliation	Multi-affiliation	0	0	0	0	0	0	0	0	0	0	0	0	0	0	0	0	0	0	0	0	0	0	0	4	0	0	0	0	0	0	0	0	0	0
OTU_703	Eukaryota	Opisthokonta	Fungi	Ascomycota	Pezizomycotina	Multi-affiliation	Multi-affiliation	Multi-affiliation	0	0	0	0	0	0	0	0	0	0	0	0	0	0	0	0	0	0	0	0	0	0	0	0	0	0	0	0	45	0	0	0	0	0
OTU_707	Eukaryota	Opisthokonta	Fungi	Basidiomycota	Agaricomycotina	Agaricomycetes	Agaricomycetes_X	Agaricomycetes_X_sp.	0	0	0	0	0	0	0	0	0	0	0	0	0	0	30	0	0	0	0	0	0	0	0	0	0	0	0	0	16	0	0	0	0	0
OTU_708	Eukaryota	Rhizaria	Cercozoa	Filosa-Sarcomonadea	Glissomonadida	Glissomonadida_X	Glissomonadida_XX	Glissomonadida_XX_sp.	0	46	0	0	0	0	0	0	0	0	0	0	0	0	0	0	0	0	0	0	0	0	0	0	0	0	0	0	0	0	0	0	0	0
OTU_710	Eukaryota	Stramenopiles	Stramenopiles_X	Labyrinthulea	Thraustochytriales	Thraustochytriaceae	Thraustochytriaceae_X	Thraustochytriaceae_X_sp.	0	0	0	0	0	0	0	0	0	0	0	0	0	0	13	0	0	0	0	0	0	0	10	0	0	0	0	0	0	0	0	0	0	0
OTU_711	Eukaryota	Opisthokonta	Fungi	Basidiomycota	Agaricomycotina	Agaricomycetes	Agaricomycetes_X	Agaricomycetes_X_sp.	0	0	0	0	0	0	0	0	0	0	0	43	3	0	0	0	0	0	0	0	0	0	0	0	0	0	0	0	0	0	0	0	0	0
OTU_719	Eukaryota	Stramenopiles	Stramenopiles_X	Labyrinthulea	Labyrinthulales	Labyrinthulaceae	Labyrinthulaceae_X	Labyrinthulaceae_X_sp.	0	0	0	0	0	0	0	0	0	0	0	0	41	0	0	0	0	0	0	0	0	0	0	0	0	0	0	0	0	0	0	0	0	0
OTU_725	Eukaryota	Alveolata	Dinophyta	Dinophyceae	Dinophyceae_X	Dinophyceae_XX	Heterocapsa	Multi-affiliation	0	0	0	0	0	0	0	0	0	0	0	0	2	0	0	0	0	0	0	0	0	0	0	0	0	0	38	0	0	0	0	0	0	0
OTU_728	Eukaryota	Alveolata	Dinophyta	Syndiniales	Dino-Group-II	Dino-Group-II-Clade-6	Dino-Group-II-Clade-6_X	Dino-Group-II-Clade-6_X_sp.	0	0	0	0	41	0	0	0	0	0	0	0	0	0	0	0	0	0	0	0	0	0	0	0	0	0	0	0	0	0	0	0	0	0
OTU_729	Eukaryota	Alveolata	Dinophyta	Syndiniales	Dino-Group-II	Dino-Group-II-Clade-6	Dino-Group-II-Clade-6_X	Dino-Group-II-Clade-6_X_sp.	0	0	0	0	0	0	0	0	0	0	0	0	0	0	0	0	0	0	0	0	0	0	0	0	0	38	0	0	0	0	0	0	0	0
OTU_730	Eukaryota	Alveolata	Ciliophora	Oligohymenophorea	Peritrichia	Zoothamniidae	Multi-affiliation	Multi-affiliation	0	0	0	0	31	0	0	0	0	0	0	0	0	0	0	0	0	0	0	0	0	0	0	0	0	0	0	0	0	0	0	0	0	0
OTU_731	Eukaryota	Alveolata	Dinophyta	Dinophyceae	Dinophyceae_X	Dinophyceae_XX	Heterocapsa	Multi-affiliation	0	0	0	0	0	0	0	0	0	0	0	0	0	0	0	0	0	0	0	0	0	0	0	0	0	43	0	0	0	0	0	0	0	0
OTU_733	Eukaryota	Alveolata	Ciliophora	Oligohymenophorea	Peritrichia	Zoothamniidae	Zoothamnium	Zoothamnium_pelagicum	0	0	0	0	0	0	0	17	0	0	0	7	0	0	0	0	0	0	0	0	0	2	0	0	0	0	0	0	8	0	0	2	0	0
OTU_735	Eukaryota	Opisthokonta	Fungi	Ascomycota	Saccharomycotina	Saccharomycetales	Saccharomycopsis	Saccharomycopsis_malanga	46	0	0	0	0	0	0	0	0	0	0	0	0	0	0	0	0	0	0	0	0	0	0	0	0	0	0	0	0	0	0	0	0	0
OTU_738	Eukaryota	Alveolata	Ciliophora	Phyllopharyngea	Cyrtophoria	Dysteriidae	Dysteriidae_X	Dysteriidae_X_sp.	0	0	0	0	14	0	0	0	0	0	0	0	0	0	0	0	0	0	0	0	0	0	0	0	0	0	0	0	0	0	0	0	0	0
OTU_739	Eukaryota	Archaeplastida	Chlorophyta	Trebouxiophyceae	Chlorellales	Chlorellales_X	Chlorella	Chlorella_stigmatophora	0	0	0	0	0	0	0	0	0	0	0	0	0	0	0	0	0	0	0	0	0	0	0	40	0	0	0	0	0	0	0	0	0	0
OTU_741	Eukaryota	Alveolata	Dinophyta	Dinophyceae	Dinophyceae_X	Dinophyceae_XX	Scrippsiella	Scrippsiella_trochoidea	1	0	0	0	14	0	0	0	0	0	0	0	0	0	1	3	2	0	2	0	0	0	0	0	0	1	0	0	0	0	0	0	0	0
OTU_743	Eukaryota	Opisthokonta	Fungi	Ascomycota	Pezizomycotina	Dothideomycetes	Capnodiales	Capnodiales_sp.	0	0	0	0	0	0	0	0	0	0	0	0	0	0	0	0	0	0	0	0	0	0	0	0	0	0	0	0	39	0	0	0	0	0
OTU_745	Eukaryota	Rhizaria	Cercozoa	Endomyxa-Ascetosporea	Paradinida	Paradinidae	Paradinidae_X	Paradinidae_X_sp.	0	0	0	0	0	0	0	0	0	0	0	0	0	0	0	30	0	0	0	0	0	0	0	0	0	0	0	0	0	0	14	0	0	0
OTU_747	Eukaryota	Opisthokonta	Fungi	Multi-affiliation	Multi-affiliation	Multi-affiliation	Multi-affiliation	Multi-affiliation	0	0	0	0	0	0	0	0	0	0	0	0	0	0	0	0	0	0	0	0	0	0	0	0	0	0	0	0	0	0	0	0	36	0
OTU_749	Eukaryota	Excavata	Discoba	Euglenozoa	Euglenida	Petalomonadales	Petalomonas	Petalomonas_cantuscygni	0	0	0	0	0	0	0	0	0	0	0	0	0	0	0	0	0	0	0	0	0	0	0	0	0	0	0	0	0	43	0	0	0	0
OTU_752	Eukaryota	Rhizaria	Cercozoa	Multi-affiliation	Multi-affiliation	Multi-affiliation	Multi-affiliation	Multi-affiliation	0	0	0	0	34	0	0	0	0	0	0	0	0	0	0	0	0	0	0	0	0	0	0	0	0	0	0	0	0	0	0	0	0	0
OTU_753	Eukaryota	Stramenopiles	Stramenopiles_X	Bicoecea	Bicoecales	Bicoecaceae	Bicoecaceae_X	Bicoecaceae_X_sp.	0	0	0	0	0	0	0	0	0	0	6	0	0	0	0	0	0	0	0	0	0	0	0	0	0	0	0	0	0	0	0	0	0	0
OTU_756	Eukaryota	Opisthokonta	Fungi	Basidiomycota	Agaricomycotina	Agaricomycetes	Multi-affiliation	Multi-affiliation	0	0	0	0	0	0	0	0	0	0	0	0	0	0	0	0	0	0	0	0	0	0	38	0	0	0	0	0	0	0	0	0	0	0
OTU_758	Eukaryota	Alveolata	Ciliophora	Oligohymenophorea	Scuticociliatia	Scuticociliatia_X	Scuticociliatia_XX	Scuticociliatia_XX_sp.	0	0	0	0	0	0	0	0	0	0	0	0	0	0	0	0	0	0	0	0	0	0	0	0	0	0	0	0	42	0	0	0	0	0
OTU_760	Eukaryota	Excavata	Discoba	Euglenozoa	Euglenida	Petalomonadales	Petalomonadales_X	Petalomonadales_X_sp.	0	0	0	0	0	0	0	0	0	0	0	0	0	0	0	0	0	43	0	0	0	0	0	0	0	0	0	0	0	0	0	0	0	0
OTU_763	Eukaryota	Opisthokonta	Mesomycetozoa	Ichthyosporea	Ichthyosphonida	Pseudoperkinsidae	Multi-affiliation	Multi-affiliation	0	0	0	0	0	0	0	0	0	0	0	0	0	0	0	0	0	33	0	0	0	0	0	0	0	0	0	0	0	0	0	0	0	0
OTU_764	Eukaryota	Rhizaria	Cercozoa	Filosa-Thecofilosea	Ventricleftida	Ventricleftida_X	Ventricleftida_XX	Ventricleftida_XX_sp.	0	0	0	0	0	0	0	0	0	0	0	0	0	0	0	0	0	0	0	0	0	29	0	0	0	0	0	0	0	0	0	0	0	0
OTU_770	Eukaryota	Archaeplastida	Chlorophyta	Nephroselmidophyceae	Nephroselmidales	Nephroselmidales_X	Nephroselmis	Nephroselmis_pyriformis	0	0	0	0	0	0	0	0	0	0	0	0	0	0	0	0	1	0	0	0	0	0	0	0	0	0	0	0	0	0	0	0	0	0
OTU_772	Eukaryota	Alveolata	Dinophyta	Dinophyceae	Dinophyceae_X	Dinophyceae_XX	Diplopsalis	Diplopsalis_lenticula	0	0	0	0	38	0	0	0	0	0	0	0	0	0	0	0	0	0	0	0	0	0	0	0	0	0	0	0	0	0	0	0	0	0
OTU_773	Eukaryota	Alveolata	Ciliophora	Phyllopharyngea	Cyrtophoria	Dysteriidae	Dysteria	Dysteria_brasiliensis	0	0	0	0	0	0	35	0	0	0	1	0	0	0	0	0	0	0	0	0	0	0	0	0	0	0	0	0	0	0	0	0	0	0
OTU_774	Eukaryota	Alveolata	Apicomplexa	Apicomplexa_X	Gregarines	Gregarines_X	Gregarines_XX	Gregarines_XX_sp.	0	0	0	0	0	0	0	0	0	0	0	0	0	0	0	0	0	36	0	0	0	0	0	0	0	0	0	0	0	0	0	0	0	0
OTU_776	Eukaryota	Alveolata	Dinophyta	Dinophyceae	Dinophyceae_X	Dinophyceae_XX	Dinophyceae_XXX	Dinophyceae_XXX_sp.	0	0	0	0	0	0	0	0	0	0	0	0	0	0	0	0	0	0	0	0	0	0	0	0	0	36	0	0	0	0	0	0	0	0
OTU_779	Eukaryota	Stramenopiles	Ochrophyta	Bacillariophyta	Bacillariophyta_X	Raphid-pennate	Multi-affiliation	Multi-affiliation	0	0	0	0	0	0	0	0	0	0	0	0	0	0	1	0	0	0	0	0	0	0	0	0	0	0	0	0	0	0	0	0	0	0
OTU_781	Eukaryota	Alveolata	Dinophyta	Dinophyceae	Dinophyceae_X	Dinophyceae_XX	Gymnodinium	Gymnodinium_sp.	0	0	0	0	0	0	0	0	0	0	19	0	0	0	0	0	0	0	0	0	0	0	0	0	1	5	0	0	0	0	0	0	0	0
OTU_783	Eukaryota	Excavata	Discoba	Euglenozoa	Kinetoplastida	Prokinetoplastidae	Prokinetoplastidae_X	Prokinetoplastidae_X_sp.	0	0	0	0	0	0	0	0	0	0	0	0	0	0	0	2	0	0	0	23	0	3	0	0	0	0	19	0	0	0	0	0	0	0
OTU_787	Eukaryota	Stramenopiles	Stramenopiles_X	Labyrinthulea	Thraustochytriales	Thraustochytriaceae	Multi-affiliation	Multi-affiliation	7	0	0	0	0	0	0	0	0	0	0	0	0	0	0	0	0	12	0	0	0	0	0	0	0	0	0	0	2	0	0	0	0	0
OTU_790	Eukaryota	Stramenopiles	Ochrophyta	Chrysophyceae	Chrysophyceae_X	Chrysophyceae_Clade-F	Clade-F_X	Clade-F_X_sp.	0	0	0	0	0	0	0	0	0	0	0	3	0	0	0	0	0	0	0	0	20	0	0	0	0	0	0	0	0	0	0	0	0	0
OTU_792	Eukaryota	Alveolata	Dinophyta	Dinophyceae	Dinophyceae_X	Dinophyceae_XX	Gymnodinium	Gymnodinium_dorsalisulcum	0	0	0	0	0	0	0	0	0	0	0	0	0	0	0	0	0	0	0	0	0	0	0	0	0	0	0	0	0	36	0	0	0	0
OTU_797	Eukaryota	Opisthokonta	Fungi	Chytridiomycota	Chytridiomycotina	Chytridiomycetes	Chytridiomycetes_X	Chytridiomycetes_X_sp.	0	0	0	0	0	0	0	0	0	0	0	0	0	0	0	0	0	0	0	0	0	0	0	0	0	0	0	0	0	0	0	0	0	32
OTU_801	Eukaryota	Rhizaria	Cercozoa	Endomyxa-Ascetosporea	Paradinida	Paradinida_X	Paradinida_XX	Paradinida_XX_sp.	0	0	0	0	0	0	0	0	0	0	0	0	0	0	12	14	0	1	0	0	0	0	0	0	0	0	0	0	0	0	0	0	0	0
OTU_802	Eukaryota	Archaeplastida	Chlorophyta	Chlorophyceae	Sphaeropleales	Multi-affiliation	Multi-affiliation	Multi-affiliation	0	0	0	0	29	0	0	0	0	0	0	0	0	0	0	0	0	0	3	0	0	0	0	0	0	0	0	0	0	0	0	0	0	0
OTU_803	Eukaryota	Stramenopiles	Ochrophyta	Bacillariophyta	Bacillariophyta_X	Polar-centric-Mediophyceae	Multi-affiliation	Multi-affiliation	0	0	0	0	0	0	0	0	0	0	0	0	0	0	2	7	0	0	0	0	0	0	6	2	2	0	0	0	0	0	0	0	0	0
OTU_807	Eukaryota	Archaeplastida	Streptophyta	Klebsormidiophyceae	Klebsormidiophyceae_X	Klebsormidiophyceae_XX	Klebsormidium	Klebsormidium_mucosum	0	0	0	0	26	0	0	0	0	0	0	0	0	0	0	0	0	0	0	0	0	0	0	0	0	0	0	0	0	0	0	0	0	0
OTU_809	Eukaryota	Alveolata	Dinophyta	Dinophyceae	Dinophyceae_X	Pfiesteriaceae	Multi-affiliation	Multi-affiliation	0	3	7	0	0	0	0	0	0	4	0	0	0	0	0	0	0	0	0	0	1	1	0	2	0	2	0	0	4	2	0	2	2	5
OTU_810	Eukaryota	Amoebozoa	Lobosa	Discosea-Flabellinia	Dactylopodida	Paramoebidae	Neoparamoeba	Neoparamoeba_pemaquidensis	0	0	0	0	0	0	0	0	0	0	0	0	0	0	0	0	0	0	0	0	7	30	0	0	0	0	0	0	0	0	0	0	0	0
OTU_813	Eukaryota	Stramenopiles	Ochrophyta	Phaeophyceae	Phaeophyceae_X	Phaeophyceae_XX	Heribaudiella	Heribaudiella_fluviatilis	0	0	0	0	0	0	0	0	0	0	0	0	0	0	0	0	0	5	25	0	0	0	0	0	0	0	0	0	0	0	0	0	0	0
OTU_815	Eukaryota	Alveolata	Dinophyta	Dinophyceae	Dinophyceae_X	Pfiesteriaceae	Pfiesteriaceae_X	Pfiesteriaceae_X_sp.	0	5	2	2	0	0	0	2	0	0	0	1	2	5	0	0	0	0	0	0	0	3	0	0	0	0	0	0	4	11	0	0	4	7
OTU_819	Eukaryota	Alveolata	Dinophyta	Dinophyceae	Dinophyceae_X	Dinophyceae_XX	Protoperidinium	Protoperidinium_conicum	0	0	0	0	0	0	0	0	0	0	29	0	0	0	0	0	0	0	0	0	0	0	0	0	0	0	0	0	0	0	0	0	0	0
OTU_820	Eukaryota	Opisthokonta	Fungi	Basidiomycota	Agaricomycotina	Agaricomycetes	Rogersella	Rogersella_griseliniae	0	0	0	0	1	0	0	0	0	0	0	0	0	0	30	0	0	0	0	0	0	0	0	0	0	0	0	0	0	0	0	0	0	0
OTU_821	Eukaryota	Alveolata	Dinophyta	Dinophyceae	Dinophyceae_X	Dinophyceae_XX	Gymnodinium	Gymnodinium_dorsalisulcum	0	0	0	0	0	0	0	0	0	0	0	0	0	0	0	0	0	0	0	0	0	0	0	0	0	0	0	0	0	7	0	0	0	0
OTU_822	Eukaryota	Rhizaria	Cercozoa	Filosa-Thecofilosea	Cryomonadida	Protaspa-lineage	Protaspa-lineage_X	Protaspa-lineage_X_sp.	30	0	0	0	0	0	0	0	0	0	0	0	0	0	0	0	0	0	0	0	0	0	0	0	0	0	0	0	0	0	0	0	0	0
OTU_823	Eukaryota	Opisthokonta	Fungi	Basidiomycota	Agaricomycotina	Agaricomycetes	Multi-affiliation	Multi-affiliation	0	0	0	0	0	0	0	0	0	0	0	0	0	0	0	0	0	0	0	0	10	0	0	0	0	0	0	0	21	0	0	0	0	0
OTU_824	Eukaryota	Alveolata	Ciliophora	Spirotrichea	Euplotia	Aspidiscidae	Aspidisca	Aspidisca_sp.	0	0	0	0	0	0	0	28	0	0	0	0	0	0	0	0	0	0	0	0	0	0	0	2	0	0	0	0	0	0	0	0	0	0
OTU_829	Eukaryota	Alveolata	Apicomplexa	Apicomplexa_X	Coccidia	Eucoccidiorida	Cryptosporidium	Cryptosporidium_fragile	0	0	0	0	27	0	0	0	0	0	0	0	0	0	0	0	0	0	0	0	0	0	0	0	0	0	0	0	0	0	0	0	0	0
OTU_834	Eukaryota	Archaeplastida	Chlorophyta	Multi-affiliation	Multi-affiliation	Multi-affiliation	Multi-affiliation	Multi-affiliation	0	0	0	0	0	0	0	0	0	0	0	0	0	0	0	0	0	0	0	0	0	0	0	0	0	28	0	0	0	0	0	0	0	0
OTU_838	Eukaryota	Opisthokonta	Fungi	Basidiomycota	Pucciniomycotina	Agaricostilbomycetes	Kondoa	Kondoa_malvinella	0	0	0	0	0	0	0	0	0	0	0	0	0	0	0	27	0	0	0	0	0	0	0	0	0	0	0	0	0	0	0	0	0	0
OTU_840	Eukaryota	Alveolata	Ciliophora	Oligohymenophorea	Scuticociliatia	Uronematidae	Paralembus	Paralembus_digitiformis	0	0	0	0	2	0	0	0	0	0	0	0	0	0	0	0	0	0	0	0	0	24	0	0	0	0	0	0	0	0	0	0	0	0
OTU_841	Eukaryota	Alveolata	Dinophyta	Syndiniales	Dino-Group-II	Dino-Group-II-Clade-1	Dino-Group-II-Clade-1_X	Dino-Group-II-Clade-1_X_sp.	0	0	0	0	0	0	0	22	0	0	0	0	0	0	0	0	0	0	0	0	0	0	0	0	0	0	0	0	0	0	0	0	0	0
OTU_843	Eukaryota	Stramenopiles	Ochrophyta	Bacillariophyta	Bacillariophyta_X	Polar-centric-Mediophyceae	Polar-centric-Mediophyceae_X	Polar-centric-Mediophyceae_X_sp.	0	0	0	0	3	0	0	0	0	3	0	0	0	0	3	6	0	0	0	0	0	0	0	5	1	0	0	0	0	0	0	0	0	0
OTU_844	Eukaryota	Archaeplastida	Chlorophyta	Ulvophyceae	Ulvales-relatives	Ulvales-relatives_X	Ulva	Ulva_compressa	0	0	0	0	12	0	0	0	0	0	0	0	0	0	0	0	0	0	0	0	0	0	4	0	2	0	0	0	0	0	0	0	0	0
OTU_848	Eukaryota	Stramenopiles	Ochrophyta	Bacillariophyta	Bacillariophyta_X	Araphid-pennate	Nanofrustulum	Nanofrustulum_shiloi	0	0	0	0	10	0	2	0	0	0	0	0	0	0	0	0	0	0	0	0	0	0	0	0	0	0	0	0	0	0	0	0	0	0
OTU_850	Eukaryota	Stramenopiles	Stramenopiles_X	Oomycota	Oomycota_X	Oomycota_XX	Plasmopara	Plasmopara_viticola	0	0	0	0	0	0	0	0	0	0	0	0	0	0	0	0	0	0	0	0	0	23	0	0	0	0	0	0	0	0	0	0	0	0
OTU_851	Eukaryota	Opisthokonta	Fungi	Basidiomycota	Ustilaginomycotina	Exobasidiomycetes	Graphiola	Graphiola_phoenicis	0	0	0	0	0	0	0	0	0	0	0	0	0	0	0	0	8	3	20	0	0	0	0	0	0	0	0	0	0	0	0	0	0	0
OTU_852	Eukaryota	Opisthokonta	Fungi	Chytridiomycota	Chytridiomycotina	Chytridiomycetes	Rhyzophidiales_X	Rhyzophidiales_X_sp.	0	0	0	0	0	0	0	0	0	0	0	0	0	0	0	0	0	0	0	0	0	0	0	0	0	0	0	0	0	0	0	24	0	0
OTU_853	Eukaryota	Opisthokonta	Fungi	Chytridiomycota	Chytridiomycotina	Chytridiomycetes	Chytridiomycetes_X	Chytridiomycetes_X_sp.	0	0	0	0	0	0	0	0	0	0	0	0	0	0	0	0	27	0	0	0	0	0	0	0	0	0	0	0	0	0	0	0	0	0
OTU_854	Eukaryota	Amoebozoa	Lobosa	Discosea-Flabellinia	Dactylopodida	Paramoebidae	Pseudoparamoeba	Multi-affiliation	0	0	0	0	0	0	0	0	0	0	0	0	0	0	0	0	0	0	0	0	0	0	0	25	0	0	0	0	0	0	0	0	0	0
OTU_855	Eukaryota	Alveolata	Dinophyta	Dinophyceae	Suessiales	Suessiales_X	Multi-affiliation	Multi-affiliation	0	0	0	0	0	0	0	0	0	0	0	0	0	0	0	0	0	0	0	0	0	0	0	0	0	0	0	0	24	0	0	0	0	0
OTU_856	Eukaryota	Opisthokonta	Fungi	Ascomycota	Pezizomycotina	Dothideomycetes	Dothideomycetes_X	Dothideomycetes_X_sp.	0	0	0	0	0	0	0	0	0	0	0	0	0	0	0	0	0	0	0	0	0	0	0	0	0	0	0	0	25	0	0	0	0	0
OTU_858	Eukaryota	Stramenopiles	Stramenopiles_X	MAST	MAST-3	MAST-3J	MAST-3J_X	MAST-3J_X_sp.	0	0	0	0	0	0	0	0	0	0	0	0	0	0	0	0	0	0	0	0	0	0	0	0	0	0	9	0	0	0	0	0	0	0
OTU_860	Eukaryota	Alveolata	Apicomplexa	Apicomplexa_X	Gregarines	Gregarines_X	Gregarinidae	Gregarinidae_sp.	0	0	0	0	0	0	0	0	0	0	0	0	0	0	0	28	0	0	0	0	0	0	0	0	0	0	0	0	0	0	0	0	0	0
OTU_865	Eukaryota	Stramenopiles	Stramenopiles_X	Labyrinthulea	Thraustochytriales	Thraustochytriaceae	Thraustochytriaceae_X	Thraustochytriaceae_X_sp.	0	0	0	0	0	0	0	0	0	0	0	0	0	0	0	0	18	0	0	0	0	6	0	0	0	0	0	0	0	0	0	0	0	0
OTU_871	Eukaryota	Stramenopiles	Stramenopiles_X	MAST	MAST-3	MAST-3J	MAST-3J_X	MAST-3J_X_sp.	0	0	0	0	0	0	0	0	0	0	0	0	7	0	0	0	0	0	0	0	0	0	0	0	0	0	0	0	0	0	0	0	0	0
OTU_873	Eukaryota	Rhizaria	Cercozoa	Filosa-Thecofilosea	Ebriida	TAGIRI1-lineage	TAGIRI1-lineage_X	TAGIRI1-lineage_X_sp.	0	0	0	0	0	0	0	0	0	0	0	0	0	0	24	0	0	0	0	0	0	0	0	0	0	0	0	0	0	0	0	0	0	0
OTU_880	Eukaryota	Rhizaria	Cercozoa	Filosa-Imbricatea	Thaumatomonadida	Thaumatomonadida_X	Thaumatomonadida_XX	Thaumatomonadida_XX_sp.	0	0	0	0	0	0	0	0	0	0	0	0	0	0	0	0	0	0	0	0	0	0	0	23	0	0	0	0	0	0	0	0	0	0
OTU_881	Eukaryota	Opisthokonta	Fungi	Basidiomycota	Pucciniomycotina	Agaricostilbomycetes	Agaricostilbum	Agaricostilbum_hyphaenes	0	0	0	0	0	0	0	0	0	0	0	0	0	0	0	0	0	0	20	0	0	0	0	0	0	0	0	0	0	0	0	0	0	0
OTU_884	Eukaryota	Excavata	Discoba	Euglenozoa	Diplonemea	Diplonemida	Diplonema	Diplonema_ambulator	0	0	0	0	0	0	0	0	0	0	0	0	0	0	0	29	0	0	0	0	0	0	0	0	0	0	0	0	0	0	0	0	0	0
OTU_896	Eukaryota	Stramenopiles	Stramenopiles_X	Oomycota	Oomycota_X	Olpidophydiales	Olpidiopsis	Olpidiopsis_sp.	0	0	0	0	0	0	0	0	0	0	0	0	0	0	0	0	0	0	11	0	0	0	0	0	0	8	0	0	0	0	0	0	0	0
OTU_899	Eukaryota	Rhizaria	Cercozoa	Filosa-Imbricatea	Euglyphida	Paulinellidae	Paulinella	Paulinella_chromatophora	0	0	0	0	0	0	0	0	0	0	0	0	0	0	0	0	0	0	0	0	3	0	0	0	0	1	0	0	0	0	0	16	0	0
OTU_901	Eukaryota	Stramenopiles	Stramenopiles_X	Bicoecea	Bicoecales	Bicoecaceae	Bicoecaceae_X	Bicoecaceae_X_sp.	0	0	0	0	0	0	0	0	0	0	0	0	0	0	0	0	0	0	0	0	0	0	0	0	1	0	0	0	0	0	0	0	0	0
OTU_905	Eukaryota	Alveolata	Dinophyta	Syndiniales	Dino-Group-II	Dino-Group-II-Clade-2	Dino-Group-II-Clade-2_X	Dino-Group-II-Clade-2_X_sp.	0	0	0	0	0	0	0	0	0	0	0	0	0	0	22	0	0	0	0	0	0	0	0	0	0	0	0	0	0	0	0	0	0	0
OTU_907	Eukaryota	Alveolata	Dinophyta	Dinophyceae	Suessiales	Suessiales_X	Multi-affiliation	Multi-affiliation	0	1	0	0	0	0	0	1	0	0	4	0	0	1	0	0	1	0	2	0	0	1	0	0	0	1	0	0	1	0	0	0	0	0
OTU_910	Eukaryota	Rhizaria	Cercozoa	Filosa-Thecofilosea	Multi-affiliation	Multi-affiliation	Multi-affiliation	Multi-affiliation	18	0	0	0	0	0	0	0	0	0	0	0	0	0	0	0	0	0	0	0	0	0	0	0	0	0	0	0	0	0	0	0	0	0
OTU_912	Eukaryota	Alveolata	Ciliophora	Phyllopharyngea	Cyrtophoria	Dysteriidae	Dysteria	Dysteria_sp.	0	0	0	0	0	0	0	0	0	0	0	0	0	0	0	0	0	0	0	0	0	0	0	0	0	0	0	0	20	0	0	0	0	0
OTU_917	Eukaryota	Alveolata	Dinophyta	Dinophyceae	Dinophyceae_X	Dinophyceae_XX	Alexandrium	Multi-affiliation	0	0	0	0	2	0	0	0	0	0	1	0	0	0	4	0	0	2	0	0	2	0	6	0	0	0	0	0	0	0	0	0	0	0
OTU_918	Eukaryota	Rhizaria	Cercozoa	Endomyxa-Ascetosporea	Paradinida	Paradinidae	Paradinidae_X	Paradinidae_X_sp.	0	0	0	0	0	0	0	0	0	0	0	0	0	0	20	0	0	0	0	0	0	0	0	0	0	0	0	0	0	0	0	0	0	0
OTU_920	Eukaryota	Alveolata	Dinophyta	Dinophyceae	Dinophyceae_X	Dinophyceae_XX	Azadinium	Azadinium_polongum	0	0	0	0	0	0	0	0	0	0	0	0	0	0	0	0	0	0	0	0	0	0	0	0	6	0	16	0	0	0	0	0	0	0
OTU_921	Eukaryota	Alveolata	Dinophyta	Dinophyceae	Suessiales	Suessiales_X	Suessiales_XX	Suessiales_XX_sp.	0	7	0	0	0	0	0	0	0	0	0	4	0	0	0	0	0	0	0	0	6	0	0	0	0	0	0	0	0	0	1	1	0	0
OTU_922	Eukaryota	Stramenopiles	Ochrophyta	Bacillariophyta	Bacillariophyta_X	Polar-centric-Mediophyceae	Thalassiosira	Thalassiosira_concaviuscula	0	0	0	0	5	0	0	0	0	0	0	0	0	0	0	0	0	0	0	0	0	0	0	0	0	0	0	0	0	0	0	0	0	0
OTU_925	Eukaryota	Opisthokonta	Fungi	Basidiomycota	Agaricomycotina	Agaricomycetes	Multi-affiliation	Multi-affiliation	0	0	0	0	0	0	0	0	0	0	17	0	0	0	0	0	0	0	0	0	0	0	0	0	0	0	0	0	0	0	0	0	0	0
OTU_927	Eukaryota	Stramenopiles	Ochrophyta	Bacillariophyta	Bacillariophyta_X	Raphid-pennate	Raphid-pennate_X	Raphid-pennate_X_sp.	0	0	0	0	0	0	0	0	0	0	0	0	0	0	21	0	0	0	0	0	0	0	0	0	0	0	0	0	0	0	0	0	0	0
OTU_928	Eukaryota	Amoebozoa	Lobosa	Discosea-Flabellinia	Dactylopodida	Paramoebidae	Paramoeba	Paramoeba_eilhardi	0	0	0	0	0	0	0	0	0	0	0	0	0	0	0	0	0	0	0	0	0	19	0	0	0	0	0	0	0	0	0	0	0	0
OTU_931	Eukaryota	Hacrobia	Telonemia	Telonemia_X	Telonemia_XX	Telonemia-Group-2	Telonema-Group-2	Telonema_antarcticum	0	0	0	0	0	0	0	0	0	0	0	0	0	0	0	0	0	0	0	0	0	0	0	0	0	0	0	0	0	0	0	0	0	6
OTU_935	Eukaryota	Alveolata	Dinophyta	Dinophyceae	Dinophyceae_X	Dinophyceae_XX	Heterocapsa	Multi-affiliation	0	0	4	0	0	0	0	0	0	2	0	0	0	0	0	0	0	0	0	0	0	0	0	1	0	0	0	0	1	2	0	0	0	4
OTU_936	Eukaryota	Excavata	Discoba	Euglenozoa	Euglenida	Petalomonadales	Notosolenus	Notosolenus_ostium	0	0	0	0	0	0	0	0	0	0	0	0	0	0	0	0	2	0	0	0	0	0	0	0	0	17	0	0	0	0	0	0	0	0
OTU_937	Eukaryota	Opisthokonta	Mesomycetozoa	Ichthyosporea	Ichthyosphonida	Abeoformidae_Group_MAIP_2	Abeoformidae_Group_MAIP_2_X	Abeoformidae_Group_MAIP_2_X_sp.	0	0	0	0	0	0	0	0	0	0	0	0	17	0	0	0	0	0	0	0	0	0	0	0	0	0	0	0	0	0	0	0	0	0
OTU_939	Eukaryota	Rhizaria	Cercozoa	Endomyxa	Novel-clade-9	Novel-clade-9_X	Novel-clade-9_XX	Novel-clade-9_XX_sp.	0	0	0	0	0	0	0	0	0	0	0	0	0	0	0	0	0	0	0	0	0	0	0	0	0	0	0	17	0	0	0	0	0	0
OTU_941	Eukaryota	Alveolata	Dinophyta	Dinophyceae	Dinophyceae_X	Dinophyceae_XX	Dinophyceae_XXX	Dinophyceae_XXX_sp.	0	0	0	0	0	0	0	0	0	0	0	0	0	0	16	0	0	0	0	0	0	0	0	0	0	0	0	0	0	0	0	0	0	0
OTU_942	Eukaryota	Opisthokonta	Fungi	Basidiomycota	Agaricomycotina	Agaricomycetes	Vuilleminia	Vuilleminia_comedens	0	0	0	0	0	0	0	0	0	0	0	0	0	0	0	0	0	0	0	0	0	0	0	0	0	0	0	0	0	0	0	0	17	0
OTU_943	Eukaryota	Alveolata	Dinophyta	Dinophyceae	Suessiales	Suessiales_X	Symbiodinium	Symbiodinium_sp.	0	0	0	0	1	0	0	0	0	0	0	0	0	0	0	1	0	0	0	0	0	0	0	0	0	0	0	0	0	1	0	0	0	0
OTU_948	Eukaryota	Alveolata	Dinophyta	Multi-affiliation	Multi-affiliation	Multi-affiliation	Multi-affiliation	Multi-affiliation	0	0	0	0	0	0	0	0	0	0	0	0	0	0	0	18	0	0	0	0	0	0	0	0	0	0	0	0	0	0	0	0	0	0
OTU_949	Eukaryota	Alveolata	Dinophyta	Dinophyceae	Dinophyceae_X	Dinophyceae_XX	Dinophyceae_XXX	Dinophyceae_XXX_sp.	0	0	0	0	0	0	0	0	0	0	0	0	0	0	0	0	0	0	0	0	0	0	0	0	0	0	0	0	15	0	0	0	0	0
OTU_950	Eukaryota	Stramenopiles	Ochrophyta	Bacillariophyta	Bacillariophyta_X	Polar-centric-Mediophyceae	Polar-centric-Mediophyceae_X	Polar-centric-Mediophyceae_X_sp.	2	0	0	0	0	1	0	0	0	2	1	0	0	0	2	1	0	0	0	0	0	0	0	0	1	0	0	0	0	0	0	0	0	0
OTU_952	Eukaryota	Alveolata	Ciliophora	Litostomatea	Haptoria	Lacrymariidae	Phialina	Phialina_sp.	0	0	0	0	16	0	0	0	0	0	0	0	0	0	0	0	0	0	0	0	0	0	0	0	0	0	0	0	0	0	0	0	0	0
OTU_959	Eukaryota	Alveolata	Dinophyta	Dinophyceae	Suessiales	Suessiales_X	Multi-affiliation	Multi-affiliation	1	0	1	0	0	0	0	0	0	0	0	0	2	0	0	0	0	0	0	0	0	0	0	0	1	2	0	0	2	2	2	0	0	0
OTU_960	Eukaryota	Stramenopiles	Stramenopiles_X	Labyrinthulea	Thraustochytriales	Thraustochytriaceae	Thraustochytrium	Thraustochytrium_sp.	0	0	0	0	0	0	0	0	0	0	0	0	0	0	0	0	0	0	0	0	0	0	0	19	0	0	0	0	0	0	0	0	0	0
OTU_964	Eukaryota	Opisthokonta	Fungi	Basidiomycota	Pucciniomycotina	Cystobasidiomycetes	Multi-affiliation	Multi-affiliation	0	0	0	0	0	0	0	0	0	0	0	0	0	0	0	0	0	0	0	0	0	0	0	0	0	0	0	0	2	0	0	0	0	0
OTU_966	Eukaryota	Opisthokonta	Fungi	Basidiomycota	Agaricomycotina	Tremellomycetes	Tremellomycetes_X	Tremellomycetes_X_sp.	0	0	0	0	0	0	0	0	0	0	0	0	0	0	14	0	0	0	0	0	0	0	0	0	0	0	0	0	0	0	0	0	0	0
OTU_967	Eukaryota	Archaeplastida	Chlorophyta	Ulvophyceae	Ulvales-relatives	Ulvales-relatives_X	Dilabifilum	Dilabifilum_sp.	0	0	0	0	1	0	0	0	0	0	0	0	0	0	0	0	0	0	0	0	0	2	0	4	0	0	0	0	0	0	0	0	0	0
OTU_970	Eukaryota	Alveolata	Ciliophora	Phyllopharyngea	Suctoria	Acinetidae	Acineta	Acineta_sp.	0	0	0	0	0	0	0	0	0	0	0	0	0	0	0	0	0	0	0	0	0	0	0	0	0	0	0	0	1	0	0	0	0	0
OTU_971	Eukaryota	Opisthokonta	Fungi	Ascomycota	Pezizomycotina	Dothideomycetes	Multi-affiliation	Multi-affiliation	0	0	0	0	0	0	8	0	0	0	0	0	0	0	0	0	0	3	0	0	0	0	0	0	0	0	0	0	0	0	0	0	0	0
OTU_974	Eukaryota	Stramenopiles	Ochrophyta	Bacillariophyta	Bacillariophyta_X	Polar-centric-Mediophyceae	Thalassiosira	Thalassiosira_oceanica	0	0	0	0	1	0	0	0	0	0	0	0	0	0	0	0	0	0	0	0	0	0	0	0	2	2	0	0	0	0	0	0	0	0
OTU_976	Eukaryota	Alveolata	Ciliophora	Spirotrichea	Choreotrichia	Multi-affiliation	Multi-affiliation	Multi-affiliation	0	0	0	0	0	0	0	0	0	0	0	0	0	0	0	0	0	4	0	0	0	0	0	0	0	2	0	0	0	0	0	0	0	0
OTU_977	Eukaryota	Alveolata	Dinophyta	Dinophyceae	Suessiales	Suessiales_X	Multi-affiliation	Multi-affiliation	0	0	1	0	0	1	0	3	0	0	1	0	0	0	0	0	0	0	0	0	0	0	0	0	2	0	3	0	0	0	3	0	1	0
OTU_982	Eukaryota	Alveolata	Dinophyta	Syndiniales	Dino-Group-II	Dino-Group-II-Clade-10-and-11	Dino-Group-II-Clade-10-and-11_X	Dino-Group-II-Clade-10-and-11_X_sp.	0	0	0	0	0	0	0	0	0	0	0	0	0	0	0	0	0	14	0	0	0	0	0	0	0	0	0	0	0	0	0	0	0	0
OTU_985	Eukaryota	Archaeplastida	Chlorophyta	Chlorophyceae	Chlamydomonadales	Chlamydomonadales_X	Chlamydomonas	Chlamydomonas_sp.	0	0	0	0	0	0	0	0	0	0	0	0	0	0	0	0	0	0	0	0	0	0	0	0	0	0	0	0	0	0	1	0	0	0
OTU_987	Eukaryota	Alveolata	Ciliophora	Phyllopharyngea	Cyrtophoria	Dysteriidae	Dysteria	Dysteria_sp.	0	0	0	0	0	0	0	0	0	0	0	2	0	0	0	0	0	0	0	0	0	0	0	0	0	0	0	0	0	0	0	0	0	0
OTU_988	Eukaryota	Archaeplastida	Chlorophyta	Prasinococcales	Prasinococcales_X	Prasinococcales-Clade-B	Prasinococcales-Clade-B_X	Prasinococcales-Clade-B1_X_sp.	0	0	0	0	0	0	0	0	0	0	0	0	0	0	0	0	10	0	0	0	0	0	0	0	0	0	0	0	0	0	0	0	0	0
OTU_989	Eukaryota	Stramenopiles	Ochrophyta	Bacillariophyta	Bacillariophyta_X	Raphid-pennate	Entomoneis	Entomoneis_alata	0	0	0	0	3	0	0	0	0	0	0	0	0	0	0	0	0	0	0	0	0	0	0	0	0	0	0	0	0	0	0	0	0	0
OTU_993	Eukaryota	Opisthokonta	Fungi	Basidiomycota	Agaricomycotina	Agaricomycetes	Hyphodontia	Hyphodontia_sp.	0	0	0	0	0	0	0	0	0	0	0	0	0	0	0	0	0	0	0	0	0	0	0	0	0	0	0	0	13	0	0	0	0	0
OTU_995	Eukaryota	Alveolata	Dinophyta	Dinophyceae	Dinophyceae_X	Dinophyceae_XX	Multi-affiliation	Multi-affiliation	0	0	0	0	0	0	0	3	1	0	0	0	0	0	0	0	0	0	0	0	0	0	0	0	0	0	0	0	0	0	0	0	2	0
OTU_1002	Eukaryota	Excavata	Discoba	Euglenozoa	Euglenida	Petalomonadales	Petalomonadales_X	Petalomonadales_X_sp.	0	0	0	0	0	0	0	0	0	0	0	0	0	0	0	0	0	0	0	0	0	0	0	0	0	0	0	0	0	0	0	14	0	0
OTU_1004	Eukaryota	Alveolata	Dinophyta	Dinophyceae	Suessiales	Suessiales_X	Symbiodinium	Symbiodinium_sp.	0	0	0	0	1	0	0	0	0	0	0	0	0	0	0	0	0	1	0	0	0	0	0	0	0	0	0	0	0	0	0	0	0	0
OTU_1005	Eukaryota	Alveolata	Apicomplexa	Apicomplexa_X	Colpodellidae	Colpodellidae_X	Colpodellidae_XX	Colpodellidae_XX_sp.	13	0	0	0	0	0	0	0	0	0	0	0	0	0	0	0	0	0	0	0	0	0	0	0	0	0	0	0	0	0	0	0	0	0
OTU_1006	Eukaryota	Excavata	Discoba	Euglenozoa	Euglenida	Petalomonadales	Petalomonas	Petalomonas_cantuscygni	0	0	0	0	0	0	0	0	0	0	0	0	0	0	0	0	0	0	0	0	0	0	14	0	0	0	0	0	0	0	0	0	0	0
OTU_1011	Eukaryota	Stramenopiles	Ochrophyta	Bacillariophyta	Bacillariophyta_X	Raphid-pennate	Achnanthes	Achnanthes_sp.	0	0	16	0	0	0	0	0	0	0	0	0	0	0	0	0	0	0	0	0	0	0	0	0	0	0	0	0	0	0	0	0	0	0
OTU_1013	Eukaryota	Alveolata	Dinophyta	Dinophyceae	Dinophyceae_X	Pfiesteriaceae	Multi-affiliation	Multi-affiliation	0	0	0	0	0	0	0	0	0	0	0	0	0	0	13	0	0	0	0	0	0	0	0	0	0	0	0	0	0	0	0	0	0	0
OTU_1015	Eukaryota	Rhizaria	Cercozoa	Filosa-Imbricatea	Filosa-Imbricatea_X	Novel-clade-2	Novel-clade-2_X	Novel-clade-2_X_sp.	0	0	0	0	0	0	0	0	0	0	0	0	0	0	0	0	0	0	0	0	0	0	10	0	0	0	0	0	0	0	0	0	0	0
OTU_1016	Eukaryota	Stramenopiles	Ochrophyta	Bacillariophyta	Bacillariophyta_X	Polar-centric-Mediophyceae	Thalassiosira	Multi-affiliation	2	0	0	0	0	0	0	0	0	5	0	0	0	0	0	0	0	0	0	0	0	0	0	0	7	0	0	0	0	0	0	0	0	0
OTU_1017	Eukaryota	Amoebozoa	Lobosa	Discosea-Flabellinia	Dactylopodida	Paramoebidae	Neoparamoeba	Neoparamoeba_pemaquidensis	0	0	0	0	0	0	0	0	0	0	0	0	0	0	0	0	0	0	0	0	2	13	0	0	0	0	0	0	0	0	0	0	0	0
OTU_1019	Eukaryota	Stramenopiles	Ochrophyta	Bacillariophyta	Bacillariophyta_X	Raphid-pennate	Achnanthes	Achnanthes_sp.	0	0	0	0	0	0	0	0	0	2	0	0	0	0	0	0	0	0	0	0	0	0	2	0	0	0	0	0	0	0	2	0	0	0
OTU_1022	Eukaryota	Alveolata	Apicomplexa	Apicomplexa_X	Gregarines	Gregarines_X	Lankesteria	Lankesteria_cystodytae	0	0	0	0	0	0	0	0	0	0	0	0	0	0	0	0	0	0	0	0	0	0	16	0	0	0	2	0	0	0	0	0	0	0
OTU_1023	Eukaryota	Alveolata	Dinophyta	Dinophyceae	Dinophyceae_X	Pfiesteriaceae	Stoeckeria	Stoeckeria_sp.	0	5	0	0	0	0	0	0	0	0	0	0	0	0	0	1	0	0	0	0	0	0	0	0	0	0	0	1	4	0	0	0	0	2
OTU_1025	Eukaryota	Amoebozoa	Lobosa	Discosea-Flabellinia	Dactylopodida	Paramoebidae	Neoparamoeba	Neoparamoeba_pemaquidensis	0	0	0	0	0	0	0	0	0	0	0	0	0	0	0	0	0	0	0	0	0	12	0	0	0	0	0	0	0	0	0	0	0	0
OTU_1026	Eukaryota	Hacrobia	Telonemia	Telonemia_X	Telonemia_XX	Telonemia-Group-2	Telonemia-Group-2_X	Telonemia-Group-2_X_sp.	0	0	0	0	0	0	0	0	0	0	0	0	0	0	0	0	0	0	0	0	0	0	0	0	0	0	0	0	0	0	0	1	0	0
OTU_1028	Eukaryota	Stramenopiles	Stramenopiles_X	MAST	MAST-6	MAST-6_X	MAST-6_XX	MAST-6_XX_sp.	0	0	0	0	0	0	0	0	0	0	0	0	0	0	0	0	0	0	0	0	0	0	12	0	0	0	0	0	0	0	0	0	0	0
OTU_1031	Eukaryota	Alveolata	Apicomplexa	Apicomplexa_X	Gregarines	Gregarines_X	Gregarinidae	Gregarinidae_sp.	0	0	0	0	0	0	0	0	0	0	0	0	15	0	0	0	0	0	0	0	0	0	0	0	0	0	0	0	0	0	0	0	0	0
OTU_1033	Eukaryota	Alveolata	Dinophyta	Dinophyceae	Suessiales	Suessiales_X	Suessiales_XX	Suessiales_XX_sp.	0	0	14	0	0	0	0	0	0	0	0	0	0	0	0	0	0	0	0	0	0	0	0	0	0	0	0	0	0	0	0	0	0	0
OTU_1035	Eukaryota	Alveolata	Dinophyta	Dinophyceae	Dinophyceae_X	Dinophyceae_XX	Alexandrium	Alexandrium_ostenfeldii	0	0	0	0	0	0	0	0	0	0	0	0	0	0	0	0	13	0	0	0	0	0	0	0	0	0	0	0	0	0	0	0	0	0
OTU_1037	Eukaryota	Stramenopiles	Stramenopiles_X	Labyrinthulea	Thraustochytriales	Thraustochytriaceae	Thraustochytrium	Thraustochytrium_striatum	0	0	0	0	0	0	0	0	14	0	0	0	0	0	0	0	0	0	0	0	0	0	0	0	0	0	0	0	0	0	0	0	0	0
OTU_1039	Eukaryota	Hacrobia	Haptophyta	Prymnesiophyceae	Prymnesiales	Chrysochromulinaceae	Chrysochromulina	Multi-affiliation	0	0	0	0	0	0	0	0	0	0	0	0	0	0	0	0	0	0	0	0	0	4	0	0	0	0	0	0	0	0	0	0	0	0
OTU_1040	Eukaryota	Alveolata	Dinophyta	Dinophyceae	Dinophyceae_X	Pfiesteriaceae	Pfiesteriaceae_X	Pfiesteriaceae_X_sp.	0	0	0	0	0	0	0	0	0	0	0	0	0	0	0	0	0	0	0	0	12	0	0	0	0	0	0	0	0	0	0	0	0	0
OTU_1045	Eukaryota	Alveolata	Dinophyta	Dinophyceae	Dinophyceae_X	Dinophyceae_XX	Bysmatrum	Bysmatrum_subsalsum	0	0	0	0	0	0	0	0	0	0	0	0	0	0	0	0	0	0	0	0	0	0	0	0	0	0	0	0	0	0	0	0	8	0
OTU_1046	Eukaryota	Opisthokonta	Mesomycetozoa	Ichthyosporea	Ichthyosphonida	Abeoformidae_Group_MAIP_2	Abeoformidae_Group_MAIP_2_X	Abeoformidae_Group_MAIP_2_X_sp.	0	0	0	0	0	0	0	0	0	0	0	0	0	0	0	0	0	0	0	0	0	2	0	0	0	0	0	0	5	0	0	0	0	0
OTU_1049	Eukaryota	Opisthokonta	Mesomycetozoa	Ichthyosporea	Ichthyosphonida	Multi-affiliation	Multi-affiliation	Multi-affiliation	0	0	0	0	0	0	0	0	0	0	0	0	0	0	0	0	14	0	0	0	0	0	0	0	0	0	0	0	0	0	0	0	0	0
OTU_1051	Eukaryota	Alveolata	Ciliophora	Oligohymenophorea	Mobilida	Trichodinidae	Trichodina	Trichodina_sinonovaculae	0	0	0	0	0	0	0	0	0	0	0	0	0	0	0	0	0	0	0	0	0	0	0	0	11	0	0	0	0	0	0	0	0	0
OTU_1053	Eukaryota	Alveolata	Dinophyta	Dinophyceae	Suessiales	Suessiales_X	Polarella	Polarella_glacialis	0	0	1	0	0	0	0	0	2	0	0	1	0	0	0	0	1	0	0	0	2	0	0	0	0	1	0	0	0	0	3	0	3	0
OTU_1056	Eukaryota	Alveolata	Dinophyta	Dinophyceae	Dinophyceae_X	Pfiesteriaceae	Pfiesteriaceae_X	Pfiesteriaceae_X_sp.	0	0	0	0	0	0	0	0	0	0	0	0	0	0	0	0	0	0	0	0	0	0	0	0	0	0	0	0	0	0	10	0	0	0
OTU_1057	Eukaryota	Rhizaria	Cercozoa	Filosa-Thecofilosea	Cryomonadida	Protaspa-lineage	Protaspa	Protaspa_longipes	0	0	0	0	1	0	0	0	0	0	0	0	0	0	1	0	0	0	0	0	0	0	4	4	0	0	0	2	0	0	0	4	0	0
OTU_1064	Eukaryota	Alveolata	Dinophyta	Dinophyceae	Dinophyceae_X	Dinophyceae_XX	Prorocentrum	Prorocentrum_sp.	0	0	0	0	0	0	0	0	0	0	0	0	0	0	0	0	0	0	0	0	0	0	0	0	0	0	0	0	0	0	0	0	14	0
OTU_1070	Eukaryota	Rhizaria	Cercozoa	Filosa-Thecofilosea	Cryomonadida	Protaspa-lineage	Protaspa-lineage_X	Protaspa-lineage_X_sp.	0	0	0	0	4	0	0	0	0	0	0	0	0	0	1	0	0	0	0	0	0	0	0	0	0	0	0	0	0	0	0	0	0	0
OTU_1071	Eukaryota	Alveolata	Ciliophora	Spirotrichea	Euplotia	Euplotidae	Euplotes	Euplotes_rariseta	0	0	0	0	0	0	0	0	0	0	0	0	2	0	0	0	0	0	0	4	0	0	0	0	0	0	0	0	0	0	0	0	0	0
OTU_1074	Eukaryota	Alveolata	Ciliophora	Oligohymenophorea	Mobilida	Trichodinidae	Trichodina	Trichodina_sinonovaculae	3	0	4	0	0	0	0	0	0	0	0	2	3	0	0	0	0	0	0	0	0	0	0	0	0	0	0	0	0	0	0	0	0	0
OTU_1079	Eukaryota	Opisthokonta	Mesomycetozoa	Ichthyosporea	Ichthyosphonida	Abeoformidae_Group_MAIP_1	Abeoformidae_Group_MAIP_1_X	Abeoformidae_Group_MAIP_1_X_sp.	11	0	0	0	0	0	0	0	0	0	0	0	0	0	0	0	0	0	0	0	0	0	0	0	0	0	0	0	0	0	0	0	0	0
OTU_1082	Eukaryota	Alveolata	Dinophyta	Dinophyceae	Suessiales	Suessiales_X	Multi-affiliation	Multi-affiliation	0	0	0	0	0	0	0	2	2	0	0	0	0	0	0	0	0	0	0	0	0	0	0	0	1	0	0	0	0	1	2	0	5	0
OTU_1083	Eukaryota	Alveolata	Apicomplexa	Apicomplexa_X	Gregarines	Gregarines_X	Gregarinidae	Gregarinidae_sp.	0	0	0	0	0	4	0	0	0	0	0	0	0	0	0	0	5	0	0	0	0	0	0	0	0	0	0	0	0	0	0	0	0	0
OTU_1084	Eukaryota	Alveolata	Apicomplexa	Apicomplexa_X	Novel-Apicomplexa-Class-1	Novel-Apicomplexa-Class-1_X	Novel-Apicomplexa-Class-1_XX	Novel-Apicomplexa-Class-1_XX_sp.	0	0	0	0	0	0	0	0	0	0	0	0	0	0	0	0	0	0	0	0	0	0	10	0	0	0	0	0	0	0	0	0	0	0
OTU_1086	Eukaryota	Alveolata	Dinophyta	Syndiniales	Dino-Group-I	Dino-Group-I-Clade-1	Dino-Group-I-Clade-1_X	Dino-Group-I-Clade-1_X_sp.	0	0	0	0	0	0	0	0	0	0	0	0	0	0	0	0	0	0	0	0	0	0	0	0	0	10	0	0	0	0	0	0	0	0
OTU_1087	Eukaryota	Alveolata	Dinophyta	Dinophyceae	Dinophyceae_X	Dinophyceae_XX	Pentapharsodinium	Pentapharsodinium_tyrrhenicum	0	0	0	0	0	0	0	0	0	0	11	0	0	0	0	0	0	0	0	0	0	0	0	0	0	0	0	0	0	0	0	0	0	0
OTU_1088	Eukaryota	Stramenopiles	Stramenopiles_X	Labyrinthulea	Labyrinthulales	Labyrinthulaceae	Labyrinthula	Labyrinthula_sp.	0	0	0	0	0	0	0	0	0	0	0	0	0	0	0	0	0	0	0	0	0	0	1	0	0	0	0	0	0	0	0	0	0	0
OTU_1093	Eukaryota	Alveolata	Dinophyta	Syndiniales	Dino-Group-II	Dino-Group-II-Clade-1	Dino-Group-II-Clade-1_X	Dino-Group-II-Clade-1_X_sp.	0	0	0	0	0	0	0	0	0	0	0	0	0	0	0	0	0	0	0	0	5	0	0	0	0	0	0	0	0	0	0	0	0	0
OTU_1094	Eukaryota	Alveolata	Dinophyta	Dinophyceae	Dinophyceae_X	Dinophyceae_XX	Scrippsiella	Scrippsiella_trochoidea	0	0	0	0	0	0	0	0	0	0	0	0	0	0	0	0	0	0	0	0	0	0	0	0	0	0	0	0	9	0	0	0	0	0
OTU_1095	Eukaryota	Opisthokonta	Mesomycetozoa	Ichthyosporea	Ichthyosphonida	Pseudoperkinsidae	Creolimax	Creolimax_fragrantissima	0	0	0	0	0	0	0	0	0	0	0	0	0	0	0	0	1	0	0	0	0	0	10	0	0	0	0	0	0	0	0	0	0	0
OTU_1096	Eukaryota	Alveolata	Dinophyta	Dinophyceae	Dinophyceae_X	Dinophyceae_XX	Scrippsiella	Scrippsiella_trochoidea	0	0	0	0	0	0	0	0	0	0	10	0	0	0	0	0	0	0	0	0	0	0	0	0	0	0	0	0	0	0	0	0	0	0
OTU_1099	Eukaryota	Alveolata	Ciliophora	Oligohymenophorea	Peritrichia	Zoothamniidae	Zoothamnopsis	Zoothamnopsis_sinica	0	0	0	3	0	0	0	0	0	0	0	0	0	0	0	0	0	0	0	0	0	0	2	0	0	0	0	0	0	0	0	0	0	0
OTU_1105	Eukaryota	Stramenopiles	Ochrophyta	Bacillariophyta	Bacillariophyta_X	Raphid-pennate	Pleurosigma	Pleurosigma_intermedium	0	0	0	0	0	1	0	0	0	0	0	0	0	0	0	0	0	0	0	0	0	0	0	1	0	11	0	0	0	0	0	0	0	0
OTU_1108	Eukaryota	Opisthokonta	Fungi	Ascomycota	Pezizomycotina	Dothideomycetes	Dothideomycetes_X	Dothideomycetes_X_sp.	0	0	0	0	1	0	0	0	0	0	0	0	0	0	0	0	0	0	0	0	0	0	0	0	0	0	0	0	0	0	0	0	0	0
OTU_1110	Eukaryota	Archaeplastida	Chlorophyta	Multi-affiliation	Multi-affiliation	Multi-affiliation	Multi-affiliation	Multi-affiliation	1	0	0	0	0	0	0	0	0	0	0	0	0	0	1	0	0	0	0	0	0	0	0	7	0	0	0	0	0	0	0	0	0	0
OTU_1113	Eukaryota	Stramenopiles	Ochrophyta	Bacillariophyta	Bacillariophyta_X	Polar-centric-Mediophyceae	Multi-affiliation	Multi-affiliation	0	0	0	0	0	0	0	0	0	0	0	0	0	0	2	2	0	0	0	0	0	0	2	3	0	0	0	0	0	0	0	0	0	0
OTU_1129	Eukaryota	Opisthokonta	Mesomycetozoa	Ichthyosporea	Ichthyosphonida	Abeoformidae_Group_MAIP_2	Abeoformidae_Group_MAIP_2_X	Abeoformidae_Group_MAIP_2_X_sp.	0	0	8	0	0	0	0	0	0	0	0	0	0	0	0	0	0	0	0	0	0	0	0	0	0	0	0	0	0	0	0	0	0	0
OTU_1131	Eukaryota	Opisthokonta	Fungi	Cryptomycota	Cryptomycotina	Cryptomycotina_X	Cryptomycotina_XX	Cryptomycotina_XX_sp.	0	0	0	0	0	0	0	0	0	0	0	0	0	0	0	0	0	12	0	0	0	0	0	0	0	0	0	0	0	0	0	0	0	0
OTU_1136	Eukaryota	Alveolata	Dinophyta	Syndiniales	Dino-Group-II	Dino-Group-II-Clade-33	Dino-Group-II-Clade-33_X	Dino-Group-II-Clade-33_X_sp._strain2	0	0	3	0	0	0	0	0	0	0	0	0	0	0	0	0	0	0	0	0	0	0	0	0	0	0	0	0	0	0	0	0	0	0
OTU_1137	Eukaryota	Alveolata	Dinophyta	Dinophyceae	Dinophyceae_X	Dinophyceae_XX	Dinophyceae_XXX	Dinophyceae_XXX_sp.	0	0	0	0	8	0	0	0	0	0	0	0	0	0	0	0	0	0	0	0	0	0	0	0	0	0	0	0	0	0	0	0	0	0
OTU_1138	Eukaryota	Rhizaria	Cercozoa	Filosa-Granofilosea	Filosa-Granofilosea_X	Massiteriidae	Massisteria	Multi-affiliation	0	0	0	0	9	0	0	0	0	0	0	0	0	0	0	0	0	0	0	0	0	0	0	0	0	0	0	0	0	0	0	0	0	0
OTU_1139	Eukaryota	Alveolata	Ciliophora	Spirotrichea	Euplotia	Aspidiscidae	Aspidisca	Aspidisca_aculeata	0	0	0	0	0	0	0	0	0	0	0	0	0	0	0	0	0	0	0	0	0	0	8	0	0	0	0	0	0	0	0	0	0	0
OTU_1141	Eukaryota	Alveolata	Dinophyta	Syndiniales	Dino-Group-I	Dino-Group-I-Clade-4	Dino-Group-I-Clade-4_X	Dino-Group-I-Clade-4_X_sp.	0	0	0	0	0	0	0	0	0	0	0	0	0	0	0	8	0	0	0	0	0	0	0	0	0	0	0	0	0	0	0	0	0	0
OTU_1154	Eukaryota	Alveolata	Ciliophora	Oligohymenophorea	Sessilida	Vorticellidae	Vorticella	Vorticella_sp.	0	7	0	0	0	0	0	0	0	0	0	0	0	0	0	0	0	0	0	0	0	0	0	0	0	0	0	0	0	0	0	0	0	0
OTU_1155	Eukaryota	Alveolata	Ciliophora	Spirotrichea	Choreotrichia	Tintinnidae	Tintinnopsis	Tintinnopsis_sp.	1	0	0	0	0	0	1	0	0	0	0	0	0	0	0	0	1	0	3	0	0	0	0	0	0	0	1	0	0	0	0	0	0	0
OTU_1156	Eukaryota	Alveolata	Dinophyta	Dinophyceae	Dinophyceae_X	Dinophyceae_XX	Heterocapsa	Multi-affiliation	0	0	0	0	0	0	0	0	0	9	0	0	0	0	0	0	0	0	0	0	0	0	0	0	0	0	0	0	0	0	0	0	0	0
OTU_1158	Eukaryota	Stramenopiles	Ochrophyta	Bacillariophyta	Bacillariophyta_X	Raphid-pennate	Raphid-pennate_X	Raphid-pennate_X_sp.	0	0	0	0	0	0	0	0	0	0	0	0	0	0	0	0	0	0	1	0	0	0	9	1	0	0	0	0	0	0	0	0	0	0
OTU_1163	Eukaryota	Alveolata	Dinophyta	Dinophyceae	Dinophyceae_X	Dinophyceae_XX	Gymnodinium	Gymnodinium_dorsalisulcum	0	0	0	0	0	0	0	0	0	0	0	0	8	0	0	0	0	0	0	0	0	0	0	0	0	0	0	0	0	0	0	0	0	0
OTU_1165	Eukaryota	Stramenopiles	Stramenopiles_X	Labyrinthulea	Labyrinthulales	Labyrinthulaceae	Labyrinthulaceae_X	Labyrinthulaceae_X_sp.	0	0	0	0	0	0	0	0	0	0	0	0	0	0	0	0	0	0	0	0	0	0	0	0	0	0	0	0	0	0	8	0	0	0
OTU_1170	Eukaryota	Opisthokonta	Fungi	Basidiomycota	Agaricomycotina	Tremellomycetes	Multi-affiliation	Multi-affiliation	0	0	0	0	0	0	0	0	0	0	0	0	0	1	0	0	0	0	0	0	0	0	0	0	0	0	0	0	0	0	0	0	0	0
OTU_1172	Eukaryota	Alveolata	Ciliophora	Phyllopharyngea	Suctoria	Acinetidae	Acineta	Acineta_tuberosa	0	0	0	0	0	0	0	0	0	0	0	0	0	0	0	0	2	0	0	0	0	0	9	0	0	0	0	0	0	0	0	0	0	0
OTU_1173	Eukaryota	Archaeplastida	Chlorophyta	Prasino-Clade-VII	Prasino-Clade-VII_X	Prasino-Clade-VII-A	Multi-affiliation	Multi-affiliation	0	0	0	0	0	0	0	0	0	0	0	0	0	0	0	0	0	9	0	0	0	0	0	0	0	0	0	0	0	0	0	0	0	0
OTU_1176	Eukaryota	Opisthokonta	Fungi	Basidiomycota	Ustilaginomycotina	Exobasidiomycetes	Multi-affiliation	Multi-affiliation	0	0	0	0	0	0	0	5	0	0	0	0	0	0	0	0	0	0	0	0	0	0	0	0	0	0	0	0	0	0	0	0	0	0
OTU_1178	Eukaryota	Alveolata	Dinophyta	Dinophyceae	Dinophyceae_X	Dinophyceae_XX	Gymnodinium	Gymnodinium_dorsalisulcum	0	0	0	0	0	0	0	0	0	0	0	0	0	0	0	0	0	0	0	0	0	0	0	0	0	0	0	0	0	0	0	7	0	0
OTU_1180	Eukaryota	Alveolata	Dinophyta	Dinophyceae	Dinophyceae_X	Dinophyceae_XX	Dinophyceae_XXX	Dinophyceae_XXX_sp.	0	0	0	0	0	0	0	0	0	0	0	0	0	0	0	0	0	0	0	0	0	0	0	0	0	0	0	0	1	0	4	0	0	0
OTU_1186	Eukaryota	Alveolata	Dinophyta	Dinophyceae	Multi-affiliation	Multi-affiliation	Multi-affiliation	Multi-affiliation	0	0	0	0	0	0	0	0	0	0	0	0	0	0	0	0	0	0	0	0	0	0	0	0	0	7	0	0	0	0	0	0	0	0
OTU_1191	Eukaryota	Alveolata	Dinophyta	Dinophyceae	Dinophyceae_X	Pfiesteriaceae	Multi-affiliation	Multi-affiliation	0	0	0	0	0	0	0	0	0	0	0	0	0	0	0	0	0	0	0	0	0	0	0	0	0	0	0	0	0	7	0	0	0	0
OTU_1192	Eukaryota	Alveolata	Dinophyta	Syndiniales	Dino-Group-II	Dino-Group-II_X	Dino-Group-II_XX	Dino-Group-II_XX_sp.	0	0	0	0	0	0	0	0	0	0	0	9	0	0	0	0	0	0	0	0	0	0	0	0	0	0	0	0	0	0	0	0	0	0
OTU_1194	Eukaryota	Apusozoa	Apusomonadidae	Apusomonadidae_Group-1	Apusomonadidae_Group-1_X	Apusomonadidae_Group-1_XX	Apusomonadidae_Group-1_XXX	Apusomonadidae_Group-1_XXX_sp.	0	0	0	0	0	0	0	0	0	0	0	0	0	0	0	0	0	0	0	0	0	0	9	0	0	0	0	0	0	0	0	0	0	0
OTU_1197	Eukaryota	Stramenopiles	Ochrophyta	Bacillariophyta	Bacillariophyta_X	Polar-centric-Mediophyceae	Thalassiosira	Thalassiosira_punctigera	0	0	0	0	0	0	0	0	0	0	0	0	0	0	0	0	0	0	0	0	0	0	0	3	0	2	0	0	0	0	0	0	0	0
OTU_1205	Eukaryota	Stramenopiles	Stramenopiles_X	Labyrinthulea	Labyrinthulales	Labyrinthulaceae	Labyrinthulaceae_X	Labyrinthulaceae_X_sp.	0	0	0	0	0	0	0	2	0	0	0	0	0	0	0	0	0	0	0	0	0	0	0	0	0	0	0	0	0	0	0	0	0	0
OTU_1210	Eukaryota	Alveolata	Dinophyta	Dinophyceae	Dinophyceae_X	Dinophyceae_XX	Bysmatrum	Bysmatrum_subsalsum	0	0	3	0	0	0	0	0	0	0	0	0	0	0	0	0	0	0	0	0	0	0	0	0	0	0	0	0	0	0	0	0	3	0
OTU_1211	Eukaryota	Alveolata	Ciliophora	Spirotrichea	Choreotrichia	Dictyocystidae	Codonellopsis	Codonellopsis_nipponica	0	0	0	0	0	0	0	0	0	0	1	0	0	0	0	0	0	1	0	0	0	0	0	0	0	2	0	0	0	0	0	0	0	0
OTU_1212	Eukaryota	Alveolata	Apicomplexa	Apicomplexa_X	Colpodellidae	Colpodellidae_X	Colpodellidae_XX	Colpodellidae_XX_sp.	8	0	0	0	0	0	0	0	0	0	0	0	0	0	0	0	0	0	0	0	0	0	0	0	0	0	0	0	0	0	0	0	0	0
OTU_1213	Eukaryota	Opisthokonta	Fungi	Basidiomycota	Agaricomycotina	Agaricomycetes	Multi-affiliation	Multi-affiliation	0	0	0	0	0	0	0	0	0	0	0	0	0	0	0	0	0	0	0	0	0	0	0	0	0	0	0	0	6	0	0	0	0	0
OTU_1216	Eukaryota	Alveolata	Ciliophora	Phyllopharyngea	Suctoria	Suctoria_X	Hypocoma	Hypocoma_acinetarum	0	0	0	0	0	0	0	0	0	0	0	0	0	0	0	0	0	0	0	0	8	0	0	0	0	0	0	0	0	0	0	0	0	0
OTU_1219	Eukaryota	Stramenopiles	Stramenopiles_X	Oomycota	Oomycota_X	Olpidophydiales	Olpidiopsis	Olpidiopsis_sp.	5	0	0	0	0	0	0	0	0	0	0	0	0	0	0	0	0	0	0	0	0	0	0	0	0	2	0	0	0	0	0	0	0	0
OTU_1221	Eukaryota	Stramenopiles	Stramenopiles_X	Labyrinthulea	Thraustochytriales	Thraustochytriaceae	quahogparasite-QPX	quahogparasite-QPX_sp.	0	0	0	0	0	0	0	0	0	0	0	0	0	0	0	0	0	0	0	0	0	7	0	0	0	0	0	0	0	0	0	0	0	0
OTU_1222	Eukaryota	Alveolata	Dinophyta	Syndiniales	Dino-Group-II	Dino-Group-II-Clade-32	Dino-Group-II-Clade-32_X	Multi-affiliation	0	0	0	0	0	1	0	0	0	0	0	0	0	0	0	0	0	0	0	0	0	0	0	0	0	0	0	0	0	2	2	0	5	0
OTU_1225	Eukaryota	Rhizaria	Cercozoa	Filosa-Thecofilosea	Cryomonadida	Protaspa-lineage	Protaspa	Protaspa_longipes	0	0	0	0	3	0	0	0	0	0	0	0	0	0	3	0	0	0	0	0	0	0	0	0	0	0	0	0	0	0	0	0	0	0
OTU_1226	Eukaryota	Excavata	Discoba	Euglenozoa	Diplonemea	Diplonemea_X	Rhynchopus	Rhynchopus_sp.	0	0	0	0	0	0	0	0	0	0	0	0	0	0	0	0	0	0	0	0	0	0	0	0	0	0	0	0	0	0	0	0	0	2
OTU_1228	Eukaryota	Excavata	Discoba	Euglenozoa	Euglenida	Petalomonadales	Petalomonadales_X	Petalomonadales_X_sp.	0	0	0	0	0	0	0	0	0	0	0	0	0	0	0	0	0	0	0	0	0	0	8	0	0	0	0	0	0	0	0	0	0	0
OTU_1230	Eukaryota	Eukaryota_X	Eukaryota_XX	Eukaryota_XXX	Eukaryota_XXXX	Eukaryota_XXXXX	Pellita	Pellita_digitata	0	0	0	0	0	0	0	0	0	0	0	0	0	0	0	0	0	0	0	0	0	7	0	0	0	0	0	0	0	0	0	0	0	0
OTU_1231	Eukaryota	Alveolata	Ciliophora	Spirotrichea	Euplotia	Aspidiscidae	Aspidisca	Aspidisca_sp.	0	0	0	0	0	0	0	0	0	0	0	0	0	0	0	7	0	0	0	0	0	0	0	0	0	0	0	0	0	0	0	0	0	0
OTU_1240	Eukaryota	Alveolata	Dinophyta	Dinophyceae	Dinophyceae_X	Dinophyceae_XX	Dinophyceae_XXX	Dinophyceae_XXX_sp.	0	0	0	0	0	0	0	0	0	0	0	0	0	0	6	0	0	0	0	0	0	0	0	0	0	0	0	0	0	0	0	0	0	0
OTU_1241	Eukaryota	Stramenopiles	Ochrophyta	Bacillariophyta	Bacillariophyta_X	Polar-centric-Mediophyceae	Thalassiosira	Multi-affiliation	0	0	0	0	0	0	0	0	0	0	0	0	0	0	0	0	0	0	0	0	0	0	0	0	6	0	0	0	0	0	0	0	0	0
OTU_1243	Eukaryota	Alveolata	Dinophyta	Syndiniales	Dino-Group-II	Dino-Group-II-Clade-39	Dino-Group-II-Clade-39_X	Dino-Group-II-Clade-39_X_sp.	0	0	0	0	0	0	0	0	0	0	0	0	0	0	0	0	0	0	0	6	0	0	0	0	0	0	0	0	0	0	0	0	0	0
OTU_1245	Eukaryota	Alveolata	Dinophyta	Dinophyceae	Dinophyceae_X	Dinophyceae_XX	Prorocentrum	Multi-affiliation	0	0	0	0	0	0	0	0	0	5	0	0	0	0	0	0	0	0	0	0	0	0	0	0	4	0	0	0	0	0	0	0	0	0
OTU_1246	Eukaryota	Alveolata	Dinophyta	Dinophyceae	Dinophyceae_X	Dinophyceae_XX	Prorocentrum	Multi-affiliation	0	0	0	0	3	0	0	0	0	0	0	0	0	0	1	0	0	0	0	0	0	0	2	0	0	0	0	0	4	0	0	0	0	0
OTU_1251	Eukaryota	Excavata	Discoba	Euglenozoa	Euglenida	Petalomonadales	Petalomonas	Petalomonas_cantuscygni	0	0	0	0	0	0	0	0	0	0	0	0	0	0	0	0	0	0	0	0	0	0	0	0	0	0	0	0	0	7	0	0	0	0
OTU_1258	Eukaryota	Alveolata	Dinophyta	Dinophyceae	Suessiales	Suessiales_X	Multi-affiliation	Multi-affiliation	0	0	0	2	0	0	0	0	0	0	0	0	0	0	0	0	0	0	0	0	0	0	0	0	0	1	0	0	0	0	0	0	0	2
OTU_1263	Eukaryota	Rhizaria	Cercozoa	Filosa-Thecofilosea	Cryomonadida	Protaspa-lineage	Multi-affiliation	Multi-affiliation	0	0	0	0	0	0	0	0	0	0	0	0	0	0	0	0	0	0	0	0	0	0	6	0	0	0	0	0	0	0	0	0	0	0
OTU_1270	Eukaryota	Alveolata	Dinophyta	Dinophyceae	Dinophyceae_X	Dinophyceae_XX	Dinophyceae_XXX	Dinophyceae_XXX_sp.	0	8	0	0	0	0	0	0	0	0	0	0	0	0	0	0	0	0	0	0	0	0	0	0	0	0	0	0	0	0	0	0	0	0
OTU_1273	Eukaryota	Rhizaria	Cercozoa	Filosa-Thecofilosea	Cryomonadida	Protaspa-lineage	Protaspa-lineage_X	Protaspa-lineage_X_sp.	0	0	0	0	0	0	0	0	0	0	0	0	0	0	0	4	0	0	0	0	0	0	0	0	0	0	0	0	0	0	0	0	0	0
OTU_1277	Eukaryota	Alveolata	Ciliophora	Phyllopharyngea	Phyllopharyngea_X	Phyllopharyngea_XX	Phyllopharyngea_XXX	Phyllopharyngea_XXX_sp.	0	0	0	0	0	0	0	0	0	0	0	0	0	0	0	0	0	0	2	0	0	0	0	0	0	0	0	0	0	0	0	0	0	0
OTU_1279	Eukaryota	Stramenopiles	Stramenopiles_X	Bicoecea	Anoecales	Cafeteriaceae	Cafeteria	Multi-affiliation	0	0	0	0	0	0	0	1	0	0	0	0	0	0	0	0	0	0	0	0	0	0	0	0	0	0	0	0	1	0	0	0	0	0
OTU_1281	Eukaryota	Rhizaria	Cercozoa	Filosa-Thecofilosea	Cryomonadida	Protaspa-lineage	Protaspa-lineage_X	Protaspa-lineage_X_sp.	0	0	0	0	6	0	0	0	0	0	0	0	0	0	0	0	0	0	0	0	0	0	0	0	0	0	0	0	0	0	0	0	0	0
OTU_1283	Eukaryota	Stramenopiles	Stramenopiles_X	MAST	MAST-3	MAST-3J	MAST-3J_X	MAST-3J_X_sp.	0	0	0	0	0	0	0	0	0	0	0	0	0	0	0	6	0	0	0	0	0	0	0	0	0	0	0	0	0	0	0	0	0	0
OTU_1286	Eukaryota	Alveolata	Ciliophora	Spirotrichea	Euplotia	Uronychiidae	Diophrys	Multi-affiliation	0	0	0	0	0	0	0	0	0	0	0	0	0	0	1	0	0	0	0	0	0	0	0	5	0	0	0	0	0	0	0	0	0	0
OTU_1287	Eukaryota	Alveolata	Ciliophora	Spirotrichea	Choreotrichia	Dictyocystidae	Codonellopsis	Codonellopsis_nipponica	0	0	0	0	0	0	0	0	0	0	0	0	0	0	0	0	5	0	0	0	0	0	0	0	0	0	0	0	0	0	0	0	0	0
OTU_1290	Eukaryota	Alveolata	Dinophyta	Syndiniales	Dino-Group-II	Dino-Group-II-Clade-46	Dino-Group-II-Clade-46_X	Dino-Group-II-Clade-46_X_sp._strain1	0	0	0	0	0	0	0	0	0	0	0	0	0	0	0	0	0	0	0	0	0	0	0	0	0	0	0	0	2	0	0	0	0	0
OTU_1292	Eukaryota	Hacrobia	Haptophyta	Prymnesiophyceae	Prymnesiales	Prymnesiaceae	Dicrateria	Multi-affiliation	5	0	0	0	0	0	0	0	0	0	1	0	0	0	0	0	0	0	0	0	0	0	0	0	0	0	0	0	0	0	0	0	0	0
OTU_1293	Eukaryota	Multi-affiliation	Multi-affiliation	Multi-affiliation	Multi-affiliation	Multi-affiliation	Multi-affiliation	Multi-affiliation	0	0	0	0	0	0	0	0	0	0	0	0	0	0	0	0	0	0	0	0	0	0	0	0	0	0	0	0	0	0	0	5	0	0
OTU_1294	Eukaryota	Opisthokonta	Fungi	Basidiomycota	Agaricomycotina	Agaricomycetes	Porotheleum	Porotheleum_fimbriatum	0	0	0	0	0	0	0	0	0	0	0	0	0	0	0	0	0	0	0	0	0	0	0	0	0	0	0	0	5	0	0	0	0	0
OTU_1296	Eukaryota	Rhizaria	Cercozoa	Filosa-Metromonadea	Metromonadida	Metromonadidae	Metromonas	Metromonas_simplex	0	0	0	0	0	0	0	0	0	0	0	0	0	0	0	0	0	0	0	0	0	0	0	6	0	0	0	0	0	0	0	0	0	0
OTU_1298	Eukaryota	Amoebozoa	Lobosa	Discosea-Flabellinia	Dactylopodida	Paramoebidae	Neoparamoeba	Neoparamoeba_pemaquidensis	0	0	0	0	0	0	0	0	0	0	0	0	0	0	0	0	0	0	0	0	0	5	0	0	0	0	0	0	0	0	0	0	0	0
OTU_1300	Eukaryota	Multi-affiliation	Multi-affiliation	Multi-affiliation	Multi-affiliation	Multi-affiliation	Multi-affiliation	Multi-affiliation	0	0	0	0	0	0	0	0	0	0	0	6	0	0	0	0	0	0	0	0	0	0	0	0	0	0	0	0	0	0	0	0	0	0
OTU_1311	Eukaryota	Alveolata	Dinophyta	Dinophyceae	Dinophyceae_X	Dinophyceae_XX	Peridinium	Peridinium_quinquecorne	0	0	0	0	0	0	0	0	0	0	0	0	0	0	0	0	0	5	0	0	0	0	0	0	0	0	0	0	0	0	0	0	0	0
OTU_1315	Eukaryota	Excavata	Discoba	Euglenozoa	Euglenida	Petalomonadales	Notosolenus	Notosolenus_ostium	0	0	0	0	0	0	0	0	0	0	0	0	0	0	0	0	0	0	0	0	0	0	0	0	6	0	0	0	0	0	0	0	0	0
OTU_1320	Eukaryota	Stramenopiles	Ochrophyta	Bacillariophyta	Bacillariophyta_X	Raphid-pennate	Multi-affiliation	Multi-affiliation	0	0	0	0	0	0	0	0	0	0	0	0	0	0	0	0	0	2	0	0	0	0	0	0	0	0	0	0	0	0	0	0	0	0
OTU_1324	Eukaryota	Alveolata	Dinophyta	Dinophyceae	Suessiales	Suessiales_X	Polarella	Polarella_glacialis	0	0	0	0	0	0	0	4	0	0	0	0	0	0	0	0	3	0	0	0	0	1	0	0	0	0	0	0	0	0	0	0	0	0
OTU_1326	Eukaryota	Alveolata	Dinophyta	Dinophyceae	Suessiales	Suessiales_X	Woloszynskia	Woloszynskia_cincta	0	0	0	0	0	0	0	0	0	0	0	0	0	0	0	0	0	0	0	0	0	0	0	0	0	0	0	0	0	0	0	0	0	6
OTU_1328	Eukaryota	Opisthokonta	Fungi	Ascomycota	Pezizomycotina	Dothideomycetes	Davidiellaceae	Davidiellaceae_sp.	0	0	0	0	0	0	0	0	0	0	4	0	0	0	0	0	0	0	0	0	0	0	0	0	0	0	0	0	0	0	0	0	1	0
OTU_1330	Eukaryota	Rhizaria	Cercozoa	Filosa-Imbricatea	Filosa-Imbricatea_X	Novel-clade-3	Novel-clade-3_X	Novel-clade-3_X_sp.	0	0	0	0	0	0	0	5	0	0	0	0	0	0	0	0	0	0	0	0	0	0	0	0	0	0	0	0	0	0	0	0	0	0
OTU_1333	Eukaryota	Alveolata	Dinophyta	Dinophyceae	Dinophyceae_X	Dinophyceae_XX	Dinophyceae_XXX	Dinophyceae_XXX_sp.	0	0	0	0	0	0	0	0	2	0	0	0	0	1	0	0	0	0	0	0	0	0	0	0	3	0	0	0	0	3	0	0	0	2
OTU_1339	Eukaryota	Opisthokonta	Choanoflagellida	Choanoflagellatea	Acanthoecida	Stephanoecidae_Group_I	Stephanoeca_Group_I	Stephanoeca_diplocostata	0	0	0	0	0	0	0	0	0	0	0	0	0	0	0	0	0	0	0	0	0	0	5	0	0	0	0	0	0	0	0	0	0	0
OTU_1344	Eukaryota	Stramenopiles	Ochrophyta	Bacillariophyta	Bacillariophyta_X	Araphid-pennate	Synedra	Synedra_fulgens	0	0	0	0	4	0	0	0	0	0	0	0	0	0	0	0	0	0	0	0	0	0	0	0	0	0	0	0	0	0	0	0	0	0
OTU_1347	Eukaryota	Stramenopiles	Ochrophyta	Bacillariophyta	Bacillariophyta_X	Raphid-pennate	Raphid-pennate_X	Raphid-pennate_X_sp.	0	0	0	0	0	0	5	0	0	0	0	0	0	0	0	0	0	0	0	0	0	0	0	0	0	0	0	0	0	0	0	0	0	0
OTU_1348	Eukaryota	Hacrobia	Cryptophyta	Cryptophyceae	Cryptophyceae_X	Cryptomonadales	Multi-affiliation	Multi-affiliation	0	0	0	0	0	0	0	0	0	0	0	0	0	0	0	0	0	0	0	0	0	0	0	0	0	0	0	0	4	0	0	0	0	0
OTU_1355	Eukaryota	Alveolata	Dinophyta	Dinophyceae	Suessiales	Suessiales_X	Multi-affiliation	Multi-affiliation	0	0	0	0	0	0	0	0	0	0	0	0	0	0	0	0	0	0	0	0	0	0	0	0	0	0	0	0	0	0	0	4	0	0
OTU_1356	Eukaryota	Alveolata	Dinophyta	Dinophyceae	Dinophyceae_X	Dinophyceae_XX	Dinophyceae_XXX	Dinophyceae_XXX_sp.	0	0	0	0	0	0	0	0	0	0	0	0	0	0	0	0	0	0	0	0	0	0	0	0	0	0	0	0	0	0	0	0	0	4
OTU_1357	Eukaryota	Alveolata	Dinophyta	Dinophyceae	Suessiales	Suessiales_X	Suessiales_XX	Suessiales_XX_sp.	0	1	0	0	0	0	0	0	0	0	0	0	0	0	0	0	0	0	0	0	0	0	0	0	0	0	0	0	0	0	0	0	0	0
OTU_1358	Eukaryota	Rhizaria	Cercozoa	Filosa-Granofilosea	Filosa-Granofilosea_X	Novel-Gran-6	Novel-Gran-6_X	Novel-Gran-6_X_sp.	0	0	0	0	0	0	0	0	0	0	0	0	0	0	0	0	0	0	0	0	0	0	0	5	0	0	0	0	0	0	0	0	0	0
OTU_1360	Eukaryota	Amoebozoa	Lobosa	Discosea-Flabellinia	Dactylopodida	Paramoebidae	Neoparamoeba	Neoparamoeba_pemaquidensis	0	0	0	0	0	0	0	0	0	0	0	0	0	0	0	0	0	0	0	0	1	6	0	0	0	0	0	0	0	0	0	0	0	0
OTU_1369	Eukaryota	Alveolata	Ciliophora	Spirotrichea	Choreotrichia	Dictyocystidae	Codonellopsis	Codonellopsis_nipponica	0	0	0	0	0	0	0	0	0	0	0	0	0	0	0	0	0	0	0	0	0	0	0	0	0	4	0	0	0	0	0	0	0	0
OTU_1377	Eukaryota	Alveolata	Dinophyta	Dinophyceae	Suessiales	Suessiales_X	Multi-affiliation	Multi-affiliation	0	0	0	0	0	0	0	0	0	0	0	0	0	0	0	0	0	0	0	0	0	0	0	0	0	0	0	0	0	4	0	0	0	0
OTU_1380	Eukaryota	Opisthokonta	Mesomycetozoa	Ichthyosporea	Ichthyosphonida	Abeoformidae_Group_MAIP_2	Abeoformidae_Group_MAIP_2_X	Abeoformidae_Group_MAIP_2_X_sp.	0	0	0	0	0	0	0	0	0	7	0	0	0	0	0	0	0	4	0	0	0	0	0	0	0	0	0	0	0	0	0	0	0	0
OTU_1383	Eukaryota	Alveolata	Dinophyta	Dinophyceae	Dinophyceae_X	Dinophyceae_XX	Dinophyceae_XXX	Dinophyceae_XXX_sp.	0	0	0	0	0	0	0	0	0	0	0	0	0	0	0	0	0	0	0	4	0	0	0	0	0	0	0	0	0	0	0	0	0	0
OTU_1389	Eukaryota	Multi-affiliation	Multi-affiliation	Multi-affiliation	Multi-affiliation	Multi-affiliation	Multi-affiliation	Multi-affiliation	0	0	0	0	0	0	0	0	0	0	0	0	0	0	0	0	0	4	0	0	0	0	0	0	0	0	0	0	0	0	0	0	0	0
OTU_1391	Eukaryota	Alveolata	Dinophyta	Dinophyceae	Suessiales	Suessiales_X	Multi-affiliation	Multi-affiliation	0	3	0	0	0	0	0	2	0	0	0	0	0	0	0	0	0	0	0	0	0	0	0	0	0	0	0	0	0	0	0	0	1	0
OTU_1393	Eukaryota	Alveolata	Dinophyta	Syndiniales	Dino-Group-II	Dino-Group-II-Clade-33	Dino-Group-II-Clade-33_X	Dino-Group-II-Clade-33_X_sp._strain2	0	0	0	0	0	0	0	0	0	0	0	0	0	0	0	0	0	0	0	0	0	0	0	0	0	0	0	0	0	0	0	4	0	0
OTU_1396	Eukaryota	Rhizaria	Cercozoa	Filosa-Imbricatea	Thaumatomonadida	Thaumatomonadida_X	Thaumatomonadida_XX	Thaumatomonadida_XX_sp.	0	0	0	0	0	0	0	0	0	0	0	0	0	0	0	0	0	0	0	0	0	0	0	6	0	0	0	0	0	0	0	0	0	0
OTU_1397	Eukaryota	Alveolata	Dinophyta	Dinophyceae	Dinophyceae_X	Dinophyceae_XX	Dinophyceae_XXX	Dinophyceae_XXX_sp.	0	4	0	0	0	0	0	0	0	0	0	0	0	0	0	0	0	0	0	0	0	0	0	0	0	0	0	0	1	0	0	0	0	0
OTU_1400	Eukaryota	Amoebozoa	Lobosa	Discosea-Flabellinia	Dactylopodida	Paramoebidae	Neoparamoeba	Neoparamoeba_pemaquidensis	0	0	0	0	0	0	0	0	0	0	0	0	0	0	0	0	0	0	0	0	0	4	0	0	0	0	0	0	0	0	0	0	0	0
OTU_1402	Eukaryota	Excavata	Discoba	Euglenozoa	Euglenida	Petalomonadales	Notosolenus	Notosolenus_ostium	5	0	0	0	0	0	0	0	0	0	0	0	0	0	0	0	0	0	0	0	0	0	0	0	0	0	0	0	0	0	0	0	0	0
OTU_1406	Eukaryota	Alveolata	Dinophyta	Dinophyceae	Dinophyceae_X	Dinophyceae_XX	Gymnodinium	Gymnodinium_dorsalisulcum	0	0	0	0	0	0	0	0	0	0	0	0	0	0	0	0	0	0	0	0	0	0	0	0	0	0	0	0	0	0	0	0	4	0
OTU_1413	Eukaryota	Alveolata	Ciliophora	Spirotrichea	Choreotrichia	Dictyocystidae	Codonellopsis	Codonellopsis_nipponica	0	0	0	0	0	0	0	0	0	0	0	0	0	0	0	0	0	0	1	0	0	0	0	0	0	0	0	0	0	0	0	0	0	0
OTU_1421	Eukaryota	Alveolata	Dinophyta	Dinophyceae	Dinophyceae_X	Pfiesteriaceae	Multi-affiliation	Multi-affiliation	0	0	0	0	0	0	0	0	0	0	0	0	0	0	0	0	0	0	0	0	0	0	0	0	0	0	0	4	0	0	0	0	0	0
OTU_1423	Eukaryota	Stramenopiles	Stramenopiles_X	Labyrinthulea	Labyrinthulales	Labyrinthulaceae	Labyrinthulaceae_X	Labyrinthulaceae_X_sp.	2	0	0	0	0	0	0	0	0	0	0	0	0	0	0	0	0	0	0	0	0	0	0	0	0	2	0	0	0	0	0	0	0	0
OTU_1427	Eukaryota	Alveolata	Dinophyta	Dinophyceae	Suessiales	Suessiales_X	Polarella	Polarella_glacialis	0	0	0	0	0	0	0	0	0	0	0	0	0	4	0	0	0	0	0	0	0	0	0	0	0	0	0	0	0	0	0	0	0	0
OTU_1428	Eukaryota	Alveolata	Dinophyta	Dinophyceae	Suessiales	Suessiales_X	Multi-affiliation	Multi-affiliation	0	0	0	0	0	1	0	0	0	0	0	0	0	0	0	0	0	0	0	0	0	4	0	0	0	0	0	0	0	0	0	0	1	0
OTU_1429	Eukaryota	Alveolata	Dinophyta	Dinophyceae	Suessiales	Suessiales_X	Multi-affiliation	Multi-affiliation	2	2	1	0	0	0	0	2	0	1	1	1	0	0	0	0	1	0	0	0	1	0	0	0	1	1	0	0	1	0	0	1	0	1
OTU_1431	Eukaryota	Alveolata	Dinophyta	Dinophyceae	Dinophyceae_X	Dinophyceae_XX	Gymnodinium	Gymnodinium_sp.	0	0	0	0	0	0	0	0	0	0	0	0	0	0	0	0	0	0	0	0	0	0	0	0	0	0	0	0	0	0	0	4	0	0
OTU_1433	Eukaryota	Stramenopiles	Ochrophyta	Bacillariophyta	Bacillariophyta_X	Polar-centric-Mediophyceae	Thalassiosira	Thalassiosira_concaviuscula	0	0	0	0	0	0	0	0	0	0	0	0	0	0	0	0	0	0	0	0	0	0	0	2	0	0	0	0	0	0	0	0	0	0
OTU_1434	Eukaryota	Alveolata	Apicomplexa	Apicomplexa_X	Gregarines	Gregarines_X	Gregarines_XX	Gregarines_XX_sp.	0	0	0	0	0	0	0	0	0	0	0	0	0	0	0	0	0	0	0	0	0	0	0	0	0	0	4	0	0	0	0	0	0	0
OTU_1435	Eukaryota	Opisthokonta	Fungi	Basidiomycota	Pucciniomycotina	Pucciniomycetes	Puccinia	Puccinia_pelargonii-zonalis	0	0	0	0	0	4	0	0	0	0	0	0	0	0	0	0	0	0	0	0	0	0	0	0	0	0	0	0	0	0	0	0	0	0
OTU_1438	Eukaryota	Alveolata	Dinophyta	Dinophyceae	Dinophyceae_X	Dinophyceae_XX	Multi-affiliation	Multi-affiliation	0	0	0	0	0	2	0	0	0	0	2	0	0	0	0	0	0	0	0	0	0	0	0	0	0	0	0	0	0	0	0	0	0	0
OTU_1443	Eukaryota	Opisthokonta	Fungi	Basidiomycota	Agaricomycotina	Agaricomycetes	Rhizochaete	Rhizochaete_radicata	0	0	0	0	0	0	0	0	0	0	0	0	4	0	0	0	0	0	0	0	0	0	0	0	0	0	0	0	0	0	0	0	0	0
OTU_1444	Eukaryota	Alveolata	Dinophyta	Dinophyceae	Dinophyceae_X	Dinophyceae_XX	Dinophyceae_XXX	Dinophyceae_XXX_sp.	2	0	0	2	0	0	0	0	0	0	0	0	0	0	0	0	0	0	0	0	0	0	0	0	0	0	0	0	0	0	0	0	0	0
OTU_1445	Eukaryota	Rhizaria	Cercozoa	Cercozoa_X	Cercozoa_XX	Cercozoa_XXX	Cercozoa_XXXX	Cercozoa_XXXX_sp.	0	0	0	0	0	0	0	0	0	0	0	0	0	0	0	0	0	0	0	0	0	0	0	4	0	0	0	0	0	0	0	0	0	0
OTU_1446	Eukaryota	Rhizaria	Cercozoa	Filosa-Imbricatea	Thaumatomonadida	Thaumatomonadidae	Reckertia	Reckertia_filosa	0	0	0	0	0	0	0	0	0	0	0	0	0	0	0	4	0	0	0	0	0	0	0	0	0	0	0	0	0	0	0	0	0	0
OTU_1447	Eukaryota	Rhizaria	Cercozoa	Filosa-Thecofilosea	Cryomonadida	Protaspa-lineage	Protaspa-lineage_X	Protaspa-lineage_X_sp.	0	0	0	0	0	0	0	0	0	0	0	0	0	0	0	0	0	0	0	0	0	0	4	0	0	0	0	0	0	0	0	0	0	0
OTU_1451	Eukaryota	Excavata	Discoba	Euglenozoa	Diplonemea	Diplonemida	Diplonema	Diplonema_ambulator	0	0	0	0	0	0	0	0	0	0	0	0	0	0	0	0	0	4	0	0	0	0	0	0	0	0	0	0	0	0	0	0	0	0
OTU_1453	Eukaryota	Opisthokonta	Fungi	Basidiomycota	Agaricomycotina	Agaricomycetes	Multi-affiliation	Multi-affiliation	0	0	0	0	0	0	0	0	0	0	0	0	0	0	0	4	0	0	0	0	0	0	0	0	0	0	0	0	0	0	0	0	0	0
OTU_1457	Eukaryota	Alveolata	Ciliophora	Litostomatea	Haptoria	Enchelyidae	Enchelys	Enchelys_gasterosteus	0	0	0	0	5	0	0	0	0	0	0	0	0	0	0	0	0	0	0	0	0	0	0	0	0	0	0	0	0	0	0	0	0	0
OTU_1461	Eukaryota	Alveolata	Perkinsea	Perkinsida	Perkinsida_X	Perkinsida_XX	Perkinsus	Multi-affiliation	0	0	0	0	0	0	0	0	0	0	0	0	0	0	0	0	0	0	0	0	0	0	0	3	0	0	0	0	0	0	0	0	0	0
OTU_1462	Eukaryota	Alveolata	Ciliophora	Oligohymenophorea	Mobilida	Trichodinidae	Trichodina	Trichodina_sinonovaculae	0	0	0	0	0	0	0	0	0	0	0	0	0	3	0	0	0	0	0	0	0	0	0	0	0	0	0	0	0	0	0	0	0	0
OTU_1463	Eukaryota	Alveolata	Apicomplexa	Apicomplexa_X	Gregarines	Gregarines_X	Multi-affiliation	Multi-affiliation	0	0	0	0	0	0	0	0	0	0	0	0	0	0	3	0	0	0	0	0	0	0	0	0	0	0	0	0	0	0	0	0	0	0
OTU_1474	Eukaryota	Alveolata	Ciliophora	Oligohymenophorea	Sessilida	Vorticellidae	Multi-affiliation	Multi-affiliation	0	0	0	0	0	0	0	0	0	0	1	0	0	0	0	0	0	0	0	0	0	0	0	0	0	0	0	0	0	0	0	0	0	0
OTU_1477	Eukaryota	Alveolata	Apicomplexa	Apicomplexa_X	Novel-Apicomplexa-Class-1	Novel-Apicomplexa-Class-1_X	Novel-Apicomplexa-Class-1_XX	Novel-Apicomplexa-Class-1_XX_sp.	0	0	0	0	0	0	0	0	0	0	0	0	0	0	0	0	0	0	0	0	0	0	3	0	0	0	0	0	0	0	0	0	0	0
OTU_1485	Eukaryota	Alveolata	Ciliophora	Spirotrichea	Choreotrichia	Dictyocystidae	Codonellopsis	Codonellopsis_nipponica	0	0	0	0	0	0	3	0	0	0	0	0	0	0	0	0	0	0	0	0	0	0	0	0	0	0	0	0	0	0	0	0	0	0
OTU_1486	Eukaryota	Alveolata	Ciliophora	Spirotrichea	Choreotrichia	Dictyocystidae	Codonellopsis	Codonellopsis_nipponica	0	0	0	0	0	0	0	0	0	0	0	0	0	0	0	0	4	0	0	0	0	0	0	0	0	0	0	0	0	0	0	0	0	0
OTU_1487	Eukaryota	Alveolata	Ciliophora	Spirotrichea	Choreotrichia	Dictyocystidae	Codonellopsis	Codonellopsis_nipponica	0	0	0	0	0	0	0	0	0	0	0	0	0	0	0	0	3	0	0	0	0	0	0	0	0	0	0	0	0	0	0	0	0	0
OTU_1488	Eukaryota	Alveolata	Ciliophora	Spirotrichea	Choreotrichia	Dictyocystidae	Codonellopsis	Codonellopsis_nipponica	0	0	0	0	0	0	3	0	0	0	0	0	0	0	0	0	0	0	0	0	0	0	0	0	0	0	0	0	0	0	0	0	0	0
OTU_1492	Eukaryota	Alveolata	Ciliophora	Spirotrichea	Choreotrichia	Dictyocystidae	Codonellopsis	Codonellopsis_nipponica	0	0	0	0	0	0	0	0	0	0	0	0	0	0	0	0	0	0	4	0	0	0	0	0	0	0	0	0	0	0	0	0	0	0
OTU_1498	Eukaryota	Alveolata	Dinophyta	Syndiniales	Dino-Group-I	Dino-Group-I-Clade-4	Euduboscquella	Euduboscquella_crenulata	0	0	0	0	0	0	0	0	0	0	3	0	0	0	0	0	0	0	0	0	0	0	0	0	0	0	0	0	0	0	0	0	0	0
OTU_1501	Eukaryota	Opisthokonta	Fungi	Multi-affiliation	Multi-affiliation	Multi-affiliation	Multi-affiliation	Multi-affiliation	0	0	0	0	0	3	0	0	0	0	0	0	0	0	0	0	0	0	0	0	0	0	0	0	0	0	0	0	0	0	0	0	0	0
OTU_1502	Eukaryota	Multi-affiliation	Multi-affiliation	Multi-affiliation	Multi-affiliation	Multi-affiliation	Multi-affiliation	Multi-affiliation	5	0	0	0	0	0	0	0	0	0	0	0	0	0	0	0	0	0	0	0	0	0	0	0	0	0	0	0	0	0	0	0	0	0
OTU_1503	Eukaryota	Archaeplastida	Chlorophyta	Multi-affiliation	Multi-affiliation	Multi-affiliation	Multi-affiliation	Multi-affiliation	0	0	0	0	0	0	0	0	0	0	0	0	0	0	3	0	0	0	0	0	0	0	0	0	0	0	0	0	0	0	0	0	0	0
OTU_1505	Eukaryota	Archaeplastida	Chlorophyta	Pyramimonadales	Pyramimonadales_X	Pyramimonadales_XX	Pyramimonas	Multi-affiliation	0	0	0	0	0	0	0	0	0	0	0	1	0	0	0	0	0	0	0	0	0	0	0	0	0	0	0	3	0	0	0	0	0	0
OTU_1514	Eukaryota	Stramenopiles	Ochrophyta	Bacillariophyta	Bacillariophyta_X	Polar-centric-Mediophyceae	Minidiscus	Multi-affiliation	0	0	0	0	0	0	0	0	0	0	0	0	0	0	0	0	0	0	0	0	0	0	0	0	0	3	0	0	0	0	0	0	0	0
OTU_1517	Eukaryota	Alveolata	Dinophyta	Dinophyceae	Suessiales	Suessiales_X	Multi-affiliation	Multi-affiliation	0	0	0	0	0	0	0	0	0	0	0	0	0	0	0	0	0	0	0	0	0	0	0	0	0	0	0	0	0	0	3	0	0	0
OTU_1521	Eukaryota	Alveolata	Dinophyta	Dinophyceae	Suessiales	Suessiales_X	Multi-affiliation	Multi-affiliation	0	0	0	0	0	0	0	0	0	0	0	3	0	0	0	0	0	0	0	0	0	0	0	0	0	0	0	0	0	0	0	0	0	0
OTU_1522	Eukaryota	Alveolata	Dinophyta	Dinophyceae	Suessiales	Suessiales_X	Multi-affiliation	Multi-affiliation	0	0	3	0	0	0	0	0	0	0	0	0	0	0	0	0	0	0	0	0	0	0	0	0	0	0	0	0	0	0	0	0	0	0
OTU_1523	Eukaryota	Alveolata	Dinophyta	Dinophyceae	Suessiales	Suessiales_X	Polarella	Polarella_glacialis	0	0	0	0	0	0	0	0	0	0	0	0	1	0	0	0	0	0	0	0	3	0	0	0	0	0	0	0	0	0	0	0	0	0
OTU_1530	Eukaryota	Alveolata	Dinophyta	Dinophyceae	Suessiales	Suessiales_X	Woloszynskia	Woloszynskia_sp.	0	0	0	0	0	0	0	0	0	0	0	0	0	0	0	0	0	0	0	0	0	0	0	0	0	0	0	0	0	0	0	3	0	0
OTU_1534	Eukaryota	Alveolata	Dinophyta	Dinophyceae	Suessiales	Suessiales_X	Multi-affiliation	Multi-affiliation	0	0	0	0	0	0	0	1	0	0	0	0	0	0	0	0	0	0	0	0	0	0	0	0	0	0	0	0	0	0	0	0	0	0
OTU_1535	Eukaryota	Alveolata	Dinophyta	Dinophyceae	Suessiales	Suessiales_X	Multi-affiliation	Multi-affiliation	0	0	0	0	0	3	0	0	0	0	0	0	0	0	0	0	0	0	0	0	0	0	0	0	0	0	0	0	0	0	0	0	0	0
OTU_1537	Eukaryota	Alveolata	Dinophyta	Dinophyceae	Suessiales	Suessiales_X	Polarella	Polarella_glacialis	0	0	0	0	0	0	0	0	0	0	3	0	0	0	0	0	0	0	0	0	0	0	0	0	0	0	0	0	0	0	0	0	0	0
OTU_1538	Eukaryota	Alveolata	Dinophyta	Dinophyceae	Suessiales	Suessiales_X	Multi-affiliation	Multi-affiliation	3	0	0	0	0	0	0	0	0	0	0	0	0	0	0	0	0	0	0	0	0	0	0	0	0	0	0	0	0	0	0	0	0	0
OTU_1540	Eukaryota	Alveolata	Dinophyta	Dinophyceae	Suessiales	Suessiales_X	Multi-affiliation	Multi-affiliation	0	0	0	0	0	0	0	0	0	0	0	0	0	0	0	0	0	0	0	0	0	0	0	0	0	0	0	0	0	0	3	0	0	0
OTU_1541	Eukaryota	Alveolata	Dinophyta	Dinophyceae	Suessiales	Suessiales_X	Multi-affiliation	Multi-affiliation	3	0	0	0	0	0	0	0	0	0	0	0	0	0	0	0	0	0	0	0	0	0	0	0	0	0	0	0	0	0	0	0	0	0
OTU_1542	Eukaryota	Alveolata	Dinophyta	Dinophyceae	Suessiales	Suessiales_X	Multi-affiliation	Multi-affiliation	0	3	0	0	0	0	0	0	0	0	0	0	0	0	0	0	0	0	0	0	0	0	0	0	0	0	0	0	0	0	0	0	0	0
OTU_1544	Eukaryota	Alveolata	Dinophyta	Dinophyceae	Suessiales	Suessiales_X	Multi-affiliation	Multi-affiliation	0	0	0	0	0	0	0	0	0	0	3	0	0	0	0	0	0	0	0	0	0	0	0	0	0	0	0	0	0	0	0	0	0	0
OTU_1546	Eukaryota	Alveolata	Dinophyta	Dinophyceae	Suessiales	Suessiales_X	Multi-affiliation	Multi-affiliation	0	0	0	0	0	0	0	0	0	0	0	3	0	0	0	0	0	0	0	0	0	0	0	0	0	0	0	0	0	0	0	0	0	0
OTU_1547	Eukaryota	Alveolata	Dinophyta	Dinophyceae	Suessiales	Suessiales_X	Polarella	Polarella_glacialis	0	0	0	0	0	0	0	0	3	0	0	0	0	0	0	0	0	0	0	0	0	0	0	0	0	0	0	0	0	0	0	0	0	0
OTU_1549	Eukaryota	Alveolata	Dinophyta	Dinophyceae	Suessiales	Suessiales_X	Polarella	Polarella_glacialis	0	0	0	0	0	0	0	0	0	0	0	0	0	0	0	0	0	0	0	0	0	0	0	0	0	0	0	0	0	0	0	3	0	0
OTU_1550	Eukaryota	Alveolata	Dinophyta	Dinophyceae	Dinophyceae_X	Dinophyceae_XX	Dinophyceae_XXX	Dinophyceae_XXX_sp.	0	0	0	0	0	0	0	0	0	0	0	0	0	0	0	3	0	0	0	0	0	0	0	0	0	0	0	0	0	0	0	0	0	0
OTU_1551	Eukaryota	Alveolata	Dinophyta	Dinophyceae	Dinophyceae_X	Dinophyceae_XX	Dinophyceae_XXX	Dinophyceae_XXX_sp.	0	0	0	0	0	0	0	0	0	0	0	0	0	0	0	0	0	0	0	0	0	0	0	0	0	0	0	0	0	0	4	0	0	0
OTU_1552	Eukaryota	Alveolata	Dinophyta	Dinophyceae	Dinophyceae_X	Dinophyceae_XX	Dinophyceae_XXX	Dinophyceae_XXX_sp.	0	0	0	0	0	0	0	0	0	0	0	0	0	0	0	0	0	0	0	0	3	0	0	0	0	0	0	0	0	0	0	0	1	0
OTU_1553	Eukaryota	Alveolata	Dinophyta	Dinophyceae	Dinophyceae_X	Dinophyceae_XX	Dinophyceae_XXX	Dinophyceae_XXX_sp.	0	0	0	0	0	0	0	0	0	0	0	0	0	0	0	0	0	0	0	0	0	0	0	0	0	0	0	0	0	3	0	0	0	0
OTU_1554	Eukaryota	Alveolata	Dinophyta	Dinophyceae	Dinophyceae_X	Dinophyceae_XX	Dinophyceae_XXX	Dinophyceae_XXX_sp.	0	0	0	0	0	0	0	0	0	0	0	0	0	0	0	0	0	0	0	0	0	0	0	0	0	0	0	0	0	3	0	0	0	0
OTU_1555	Eukaryota	Alveolata	Dinophyta	Dinophyceae	Dinophyceae_X	Dinophyceae_XX	Dinophyceae_XXX	Dinophyceae_XXX_sp.	0	0	0	0	0	0	0	0	0	0	0	0	0	0	0	0	0	0	0	0	0	0	0	0	0	0	0	0	0	0	0	4	0	0
OTU_1556	Eukaryota	Alveolata	Dinophyta	Dinophyceae	Dinophyceae_X	Dinophyceae_XX	Dinophyceae_XXX	Dinophyceae_XXX_sp.	0	0	0	0	0	0	0	3	0	0	0	0	0	0	0	0	0	0	0	0	0	0	0	0	0	0	0	0	0	0	0	0	0	0
OTU_1557	Eukaryota	Stramenopiles	Ochrophyta	Bacillariophyta	Bacillariophyta_X	Polar-centric-Mediophyceae	Thalassiosira	Thalassiosira_pseudonana	0	0	0	0	0	0	0	0	0	0	0	0	0	0	0	3	0	0	0	0	0	0	0	0	0	0	0	0	0	0	0	0	0	0
OTU_1558	Eukaryota	Alveolata	Dinophyta	Dinophyceae	Suessiales	Suessiales_X	Suessiales_XX	Suessiales_XX_sp.	0	0	0	0	0	0	0	0	0	0	0	0	0	0	0	0	0	0	0	0	0	0	0	0	0	0	0	0	3	0	0	0	0	0
OTU_1559	Eukaryota	Alveolata	Dinophyta	Dinophyceae	Dinophyceae_X	Dinophyceae_XX	Dinophyceae_XXX	Dinophyceae_XXX_sp.	0	0	0	0	0	0	0	0	0	0	0	0	0	3	0	0	0	0	0	0	0	0	0	0	0	0	0	0	0	0	0	0	0	0
OTU_1560	Eukaryota	Alveolata	Dinophyta	Dinophyceae	Dinophyceae_X	Dinophyceae_XX	Dinophyceae_XXX	Dinophyceae_XXX_sp.	0	0	0	0	0	0	0	0	0	0	0	0	0	0	0	0	0	0	0	0	0	0	0	0	0	0	0	0	3	0	0	0	0	0
OTU_1562	Eukaryota	Alveolata	Dinophyta	Dinophyceae	Dinophyceae_X	Dinophyceae_XX	Dinophyceae_XXX	Dinophyceae_XXX_sp.	0	0	0	0	0	0	0	0	3	0	0	0	0	0	0	0	0	0	0	0	0	0	0	0	0	0	0	0	0	0	0	0	0	0
OTU_1563	Eukaryota	Alveolata	Dinophyta	Dinophyceae	Dinophyceae_X	Dinophyceae_XX	Dinophyceae_XXX	Dinophyceae_XXX_sp.	0	0	0	0	0	0	0	0	0	0	0	0	0	0	0	0	0	0	0	0	0	0	0	0	0	0	0	0	0	4	0	0	0	0
OTU_1566	Eukaryota	Alveolata	Dinophyta	Dinophyceae	Suessiales	Suessiales_X	Suessiales_XX	Suessiales_XX_sp.	0	0	0	0	0	0	0	0	3	0	0	0	0	0	0	0	0	0	0	0	0	0	0	0	0	0	0	0	0	0	0	0	0	0
OTU_1567	Eukaryota	Alveolata	Dinophyta	Dinophyceae	Suessiales	Suessiales_X	Suessiales_XX	Suessiales_XX_sp.	0	0	0	0	0	0	0	0	0	0	0	0	0	0	0	0	0	0	0	0	0	0	0	0	0	0	0	0	0	0	0	0	0	3
OTU_1569	Eukaryota	Alveolata	Dinophyta	Dinophyceae	Suessiales	Suessiales_X	Suessiales_XX	Suessiales_XX_sp.	0	0	0	0	0	0	0	0	0	0	0	0	0	0	0	0	0	0	0	0	0	0	0	0	0	0	0	0	3	0	0	0	0	0
OTU_1570	Eukaryota	Stramenopiles	Ochrophyta	Bacillariophyta	Bacillariophyta_X	Polar-centric-Mediophyceae	Multi-affiliation	Multi-affiliation	3	0	0	0	0	0	0	0	0	0	0	0	0	0	0	0	0	0	0	0	0	0	0	0	0	0	0	0	0	0	0	0	0	0
OTU_1571	Eukaryota	Alveolata	Dinophyta	Dinophyceae	Dinophyceae_X	Dinophyceae_XX	Dinophyceae_XXX	Dinophyceae_XXX_sp.	0	0	0	0	0	0	0	0	0	0	0	0	0	0	0	0	0	0	0	0	0	0	3	0	0	0	0	0	0	0	0	0	0	0
OTU_1576	Eukaryota	Opisthokonta	Mesomycetozoa	Ichthyosporea	Ichthyosphonida	Pseudoperkinsidae	Multi-affiliation	Multi-affiliation	0	0	0	0	0	0	0	0	0	0	0	0	0	0	0	0	0	0	0	0	0	0	0	0	0	1	0	0	0	0	0	0	0	0
OTU_1580	Eukaryota	Alveolata	Dinophyta	Dinophyceae	Dinophyceae_X	Dinophyceae_XX	Prorocentrum	Prorocentrum_micans	0	0	0	0	3	0	0	0	0	0	0	0	0	0	0	0	0	0	0	0	0	0	0	0	0	0	0	0	0	0	0	0	0	0
OTU_1582	Eukaryota	Opisthokonta	Fungi	Basidiomycota	Agaricomycotina	Agaricomycetes	Multi-affiliation	Multi-affiliation	0	0	0	0	0	0	0	0	0	0	0	0	0	0	0	0	0	0	0	0	0	0	0	0	0	0	0	0	3	0	0	0	0	0
OTU_1589	Eukaryota	Alveolata	Dinophyta	Dinophyceae	Dinophyceae_X	Dinophyceae_XX	Alexandrium	Multi-affiliation	0	0	0	0	0	0	0	0	0	0	0	0	0	0	3	0	0	0	0	0	0	0	0	0	0	0	0	0	0	0	0	0	0	0
OTU_1608	Eukaryota	Multi-affiliation	Multi-affiliation	Multi-affiliation	Multi-affiliation	Multi-affiliation	Multi-affiliation	Multi-affiliation	0	0	0	0	0	0	0	0	0	0	0	0	0	0	0	2	0	0	0	0	0	0	0	0	0	0	0	0	0	0	0	0	0	0
OTU_1611	Eukaryota	Alveolata	Dinophyta	Dinophyceae	Dinophyceae_X	Dinophyceae_XX	Dinophyceae_XXX	Dinophyceae_XXX_sp.	0	0	0	0	0	0	0	0	0	0	0	0	0	0	0	0	0	0	0	0	0	0	0	0	3	2	0	0	0	0	0	0	0	0
OTU_1615	Eukaryota	Opisthokonta	Fungi	Basidiomycota	Agaricomycotina	Agaricomycetes	Hyphodontia	Hyphodontia_sp.	0	0	0	0	0	0	0	0	0	0	0	0	0	0	0	0	0	0	0	0	0	0	0	0	0	0	0	0	3	0	0	0	0	0
OTU_1621	Eukaryota	Alveolata	Dinophyta	Dinophyceae	Dinophyceae_X	Dinophyceae_XX	Multi-affiliation	Multi-affiliation	3	0	0	0	0	0	0	0	0	0	0	0	0	0	0	0	0	0	0	0	0	0	0	0	0	0	0	0	0	0	0	0	0	0
OTU_1628	Eukaryota	Amoebozoa	Lobosa	Discosea-Flabellinia	Dactylopodida	Paramoebidae	Neoparamoeba	Neoparamoeba_pemaquidensis	0	0	0	0	0	0	0	0	0	0	0	0	0	0	0	0	0	0	0	0	0	3	0	0	0	0	0	0	0	0	0	0	0	0
OTU_1629	Eukaryota	Amoebozoa	Lobosa	Discosea-Flabellinia	Dactylopodida	Paramoebidae	Neoparamoeba	Neoparamoeba_pemaquidensis	0	0	0	0	0	0	0	0	0	0	0	0	0	0	0	0	0	0	0	0	0	3	0	0	0	0	0	0	0	0	0	0	0	0
OTU_1630	Eukaryota	Amoebozoa	Lobosa	Discosea-Flabellinia	Dactylopodida	Paramoebidae	Neoparamoeba	Neoparamoeba_pemaquidensis	0	0	0	0	0	0	0	0	0	0	0	0	0	0	0	0	0	0	0	0	0	4	0	0	0	0	0	0	0	0	0	0	0	0
OTU_1631	Eukaryota	Amoebozoa	Lobosa	Discosea-Flabellinia	Dactylopodida	Paramoebidae	Neoparamoeba	Neoparamoeba_pemaquidensis	0	0	0	0	0	0	0	0	0	0	0	0	0	0	0	0	0	0	0	0	3	0	0	0	0	0	0	0	0	0	0	0	0	0
OTU_1632	Eukaryota	Amoebozoa	Lobosa	Discosea-Flabellinia	Dactylopodida	Paramoebidae	Neoparamoeba	Neoparamoeba_pemaquidensis	0	0	0	0	0	0	0	0	0	0	0	0	0	0	0	0	0	0	0	0	0	4	0	0	0	0	0	0	0	0	0	0	0	0
OTU_1633	Eukaryota	Amoebozoa	Lobosa	Discosea-Flabellinia	Dactylopodida	Paramoebidae	Neoparamoeba	Neoparamoeba_pemaquidensis	0	0	0	0	0	0	0	0	0	0	0	0	0	0	0	0	0	0	0	0	0	3	0	0	0	0	0	0	0	0	0	0	0	0
OTU_1634	Eukaryota	Rhizaria	Cercozoa	Filosa-Granofilosea	Filosa-Granofilosea_X	Massiteriidae	Multi-affiliation	Multi-affiliation	0	0	0	0	0	0	0	3	0	0	0	0	0	0	0	0	0	0	0	0	0	0	0	0	0	0	0	0	0	0	0	0	0	0
OTU_1640	Eukaryota	Excavata	Discoba	Euglenozoa	Euglenida	Petalomonadales	Petalomonas	Petalomonas_cantuscygni	0	0	0	0	0	0	0	0	0	0	0	0	0	0	0	0	0	0	0	0	0	0	0	0	0	3	0	0	0	0	0	0	0	0
OTU_1642	Eukaryota	Excavata	Discoba	Euglenozoa	Euglenida	Petalomonadales	Petalomonadales_X	Petalomonadales_X_sp.	0	0	0	0	0	0	0	0	0	0	0	0	0	0	0	0	0	5	0	0	0	0	0	0	0	0	0	0	0	0	0	0	0	0
OTU_1648	Eukaryota	Alveolata	Ciliophora	Oligohymenophorea	Peritrichia	Zoothamniidae	Zoothamnium	Zoothamnium_pelagicum	0	0	0	0	0	0	0	0	0	0	0	0	0	0	0	0	0	0	0	0	0	0	0	0	0	0	0	0	2	0	0	0	0	0
OTU_1653	Eukaryota	Alveolata	Apicomplexa	Apicomplexa_X	Gregarines	Gregarines_X	Gregarines_XX	Gregarines_XX_sp.	0	0	0	0	0	0	0	0	0	0	0	0	0	0	0	3	0	0	0	0	0	0	0	0	0	0	0	0	0	0	0	0	0	0
OTU_1655	Eukaryota	Opisthokonta	Mesomycetozoa	Ichthyosporea	Ichthyosphonida	Abeoformidae_Group_MAIP_2	Abeoformidae_Group_MAIP_2_X	Abeoformidae_Group_MAIP_2_X_sp.	0	0	0	0	0	0	0	0	0	0	0	0	0	0	0	0	0	0	0	0	0	0	0	0	0	0	0	0	1	0	0	0	0	0
OTU_1657	Eukaryota	Stramenopiles	Ochrophyta	Bacillariophyta	Bacillariophyta_X	Raphid-pennate	Sellaphora	Multi-affiliation	0	0	0	0	0	3	0	0	0	0	0	0	0	0	0	0	0	0	0	0	0	0	0	0	0	0	0	0	0	0	0	0	0	0
OTU_1663	Eukaryota	Stramenopiles	Ochrophyta	Bacillariophyta	Bacillariophyta_X	Raphid-pennate	Raphid-pennate_X	Raphid-pennate_X_sp.	0	0	0	0	0	0	0	0	0	0	0	0	0	0	0	0	0	0	0	0	0	0	0	0	3	0	0	0	0	0	0	0	0	0
OTU_1664	Eukaryota	Alveolata	Ciliophora	Spirotrichea	Choreotrichia	Dictyocystidae	Codonellopsis	Codonellopsis_nipponica	0	0	0	0	0	0	0	0	0	0	0	0	0	0	0	0	3	0	0	0	0	0	0	0	0	0	0	0	0	0	0	0	0	0
OTU_1670	Eukaryota	Alveolata	Ciliophora	Spirotrichea	Choreotrichia	Dictyocystidae	Codonellopsis	Codonellopsis_nipponica	0	0	0	0	0	0	0	0	0	0	0	0	0	0	0	0	4	0	0	0	0	0	0	0	0	0	0	0	0	0	0	0	0	0
OTU_1674	Eukaryota	Alveolata	Ciliophora	Spirotrichea	Choreotrichia	Dictyocystidae	Codonellopsis	Codonellopsis_nipponica	0	0	0	0	0	0	0	0	0	0	5	0	0	0	0	0	0	0	0	0	0	0	0	0	0	0	0	0	0	0	0	0	0	0
OTU_1675	Eukaryota	Alveolata	Ciliophora	Spirotrichea	Choreotrichia	Dictyocystidae	Codonellopsis	Codonellopsis_nipponica	0	0	0	0	0	0	0	0	0	0	0	0	0	0	0	0	0	3	0	0	0	0	0	0	0	0	0	0	0	0	0	0	0	0
OTU_1681	Eukaryota	Archaeplastida	Chlorophyta	Multi-affiliation	Multi-affiliation	Multi-affiliation	Multi-affiliation	Multi-affiliation	0	0	0	0	3	0	0	0	0	0	0	0	0	0	0	0	0	0	0	0	0	0	0	0	0	0	0	0	0	0	0	0	0	0
OTU_1682	Eukaryota	Archaeplastida	Chlorophyta	Chlorophyceae	Sphaeropleales	Sphaeropleales_X	Sphaeropleales_XX	Sphaeropleales__XX_sp.	0	0	0	0	0	0	0	0	0	0	0	0	0	0	0	0	0	0	0	0	0	0	0	3	0	0	0	0	0	0	0	0	0	0
OTU_1684	Eukaryota	Alveolata	Dinophyta	Syndiniales	Dino-Group-I	Dino-Group-I-Clade-4	Euduboscquella	Euduboscquella_crenulata	0	0	0	0	0	0	0	0	0	0	0	0	0	0	0	0	0	3	0	0	0	0	0	0	0	0	0	0	0	0	0	0	0	0
OTU_1688	Eukaryota	Alveolata	Dinophyta	Dinophyceae	Dinophyceae_X	Dinophyceae_XX	Protoperidinium	Protoperidinium_bipes	0	0	0	0	0	0	0	0	0	0	0	0	0	0	0	0	0	0	0	0	0	0	0	0	0	0	3	0	0	0	0	0	0	0
OTU_1691	Eukaryota	Stramenopiles	Ochrophyta	Bacillariophyta	Bacillariophyta_X	Polar-centric-Mediophyceae	Chaetoceros	Chaetoceros_sp.	0	0	0	0	0	0	0	0	0	0	0	0	0	0	0	0	3	0	0	0	0	0	0	0	0	0	0	0	0	0	0	0	0	0
OTU_1692	Eukaryota	Alveolata	Dinophyta	Dinophyceae	Suessiales	Suessiales_X	Multi-affiliation	Multi-affiliation	0	0	0	0	0	0	0	0	0	0	0	0	0	0	0	0	0	0	0	0	0	0	0	0	0	0	0	3	0	0	0	0	0	0
OTU_1694	Eukaryota	Alveolata	Dinophyta	Dinophyceae	Suessiales	Suessiales_X	Multi-affiliation	Multi-affiliation	0	0	0	0	0	0	0	3	0	0	0	0	0	0	0	0	0	0	0	0	0	0	0	0	0	0	0	0	0	0	0	0	0	0
OTU_1697	Eukaryota	Stramenopiles	Ochrophyta	Bacillariophyta	Bacillariophyta_X	Araphid-pennate	Staurosira	Staurosira_sp.	4	0	0	0	0	0	0	0	0	0	0	0	0	0	0	0	0	0	0	0	0	0	0	0	0	0	0	0	0	0	0	0	0	0
OTU_1700	Eukaryota	Alveolata	Dinophyta	Dinophyceae	Suessiales	Suessiales_X	Multi-affiliation	Multi-affiliation	0	3	0	0	0	0	0	0	0	0	0	0	0	0	0	0	0	0	0	0	0	0	0	0	0	0	0	0	0	0	0	0	0	0
OTU_1701	Eukaryota	Alveolata	Dinophyta	Dinophyceae	Suessiales	Suessiales_X	Polarella	Polarella_glacialis	0	0	0	0	0	0	0	0	0	0	0	0	0	0	0	0	0	0	0	0	0	0	0	0	0	0	0	3	0	0	0	0	0	0
OTU_1702	Eukaryota	Alveolata	Dinophyta	Dinophyceae	Suessiales	Suessiales_X	Polarella	Polarella_glacialis	0	0	0	0	0	0	0	0	0	0	0	0	0	0	0	0	0	3	0	0	0	0	0	0	0	0	0	0	0	0	0	0	0	0
OTU_1704	Eukaryota	Alveolata	Dinophyta	Dinophyceae	Suessiales	Suessiales_X	Polarella	Polarella_glacialis	0	0	0	0	0	0	0	0	0	0	0	3	0	0	0	0	0	0	0	0	0	0	0	0	0	0	0	0	0	0	0	0	0	0
OTU_1705	Eukaryota	Alveolata	Dinophyta	Dinophyceae	Suessiales	Suessiales_X	Polarella	Polarella_glacialis	0	0	0	0	0	0	0	0	0	0	0	0	0	0	0	0	0	0	0	0	0	0	0	0	0	0	0	0	0	3	0	0	0	0
OTU_1707	Eukaryota	Archaeplastida	Chlorophyta	Chlorophyceae	Sphaeropleales	Sphaeropleales_X	Bracteacoccus	Bracteacoccus_sp.	0	0	0	0	0	0	0	0	0	0	0	0	0	0	0	0	0	0	0	0	0	0	0	0	0	0	0	0	0	0	0	0	0	3
OTU_1710	Eukaryota	Alveolata	Dinophyta	Dinophyceae	Suessiales	Suessiales_X	Multi-affiliation	Multi-affiliation	0	0	0	0	0	0	0	0	0	0	0	0	0	0	0	0	0	0	0	0	0	0	0	0	3	0	0	0	0	0	0	0	0	0
OTU_1711	Eukaryota	Alveolata	Dinophyta	Dinophyceae	Suessiales	Suessiales_X	Polarella	Polarella_glacialis	0	0	0	1	0	0	0	0	0	0	0	0	3	0	0	0	0	0	0	0	0	0	0	0	0	0	0	0	0	0	0	0	0	0
OTU_1714	Eukaryota	Alveolata	Dinophyta	Dinophyceae	Suessiales	Suessiales_X	Multi-affiliation	Multi-affiliation	0	0	0	0	0	0	0	0	0	0	0	0	0	0	0	0	0	0	0	0	0	0	0	0	0	0	3	0	0	0	0	0	0	0
OTU_1718	Eukaryota	Alveolata	Dinophyta	Dinophyceae	Suessiales	Suessiales_X	Multi-affiliation	Multi-affiliation	3	0	0	0	0	0	0	0	0	0	0	0	0	0	0	0	0	0	0	0	0	0	0	0	0	0	0	0	0	0	0	0	0	0
OTU_1721	Eukaryota	Alveolata	Dinophyta	Dinophyceae	Suessiales	Suessiales_X	Polarella	Polarella_glacialis	0	0	0	0	0	0	0	0	0	0	0	0	0	0	0	0	0	0	0	0	0	3	0	0	0	0	0	0	0	0	0	0	0	0
OTU_1723	Eukaryota	Stramenopiles	Ochrophyta	Bacillariophyta	Bacillariophyta_X	Polar-centric-Mediophyceae	Multi-affiliation	Multi-affiliation	0	0	0	0	0	0	0	0	0	0	0	0	0	0	0	3	0	0	0	0	0	0	0	0	0	0	0	0	0	0	0	0	0	0
OTU_1725	Eukaryota	Stramenopiles	Ochrophyta	Bacillariophyta	Bacillariophyta_X	Polar-centric-Mediophyceae	Multi-affiliation	Multi-affiliation	0	0	0	0	0	0	0	0	0	0	0	0	0	0	0	3	0	0	0	0	0	0	0	0	0	0	0	0	0	0	0	0	0	0
OTU_1726	Eukaryota	Stramenopiles	Ochrophyta	Bacillariophyta	Bacillariophyta_X	Polar-centric-Mediophyceae	Multi-affiliation	Multi-affiliation	0	0	0	0	0	0	0	0	0	0	0	0	0	0	0	0	0	0	0	0	0	0	0	3	0	0	0	0	0	0	0	0	0	0
OTU_1728	Eukaryota	Alveolata	Ciliophora	Spirotrichea	Euplotia	Euplotidae	Euplotes	Euplotes_minuta	0	0	0	0	0	0	0	0	0	0	0	0	1	0	0	0	0	0	0	0	0	0	0	0	0	0	0	0	0	0	0	0	0	0
OTU_1736	Eukaryota	Alveolata	Dinophyta	Dinophyceae	Suessiales	Suessiales_X	Suessiales_XX	Suessiales_XX_sp.	0	0	0	0	0	0	0	0	3	0	0	0	0	0	0	0	0	0	0	0	0	0	0	0	0	0	0	0	0	0	0	0	0	0
OTU_1737	Eukaryota	Alveolata	Dinophyta	Dinophyceae	Dinophyceae_X	Dinophyceae_XX	Dinophyceae_XXX	Dinophyceae_XXX_sp.	0	0	0	0	0	0	0	0	0	0	0	0	0	0	0	0	0	0	0	0	0	0	0	0	0	0	0	0	3	0	0	0	0	0
OTU_1738	Eukaryota	Alveolata	Dinophyta	Dinophyceae	Suessiales	Suessiales_X	Suessiales_XX	Suessiales_XX_sp.	0	0	0	0	0	0	0	0	0	0	0	0	0	0	0	0	0	0	0	0	3	0	0	0	0	0	0	0	0	0	0	0	0	0
OTU_1739	Eukaryota	Alveolata	Dinophyta	Dinophyceae	Dinophyceae_X	Dinophyceae_XX	Dinophyceae_XXX	Dinophyceae_XXX_sp.	0	0	0	0	0	0	0	0	0	0	0	0	0	0	0	0	0	0	0	0	3	0	0	0	0	0	0	0	0	0	0	0	0	0
OTU_1740	Eukaryota	Alveolata	Dinophyta	Dinophyceae	Dinophyceae_X	Dinophyceae_XX	Dinophyceae_XXX	Dinophyceae_XXX_sp.	0	0	0	0	0	0	0	0	0	0	0	0	0	0	0	0	0	0	0	0	3	0	0	0	0	0	0	0	0	0	0	0	0	0
OTU_1741	Eukaryota	Alveolata	Dinophyta	Dinophyceae	Suessiales	Suessiales_X	Suessiales_XX	Suessiales_XX_sp.	0	0	0	0	0	0	0	0	0	0	0	0	0	0	0	0	0	0	0	0	0	0	0	0	0	0	0	0	0	3	0	0	0	0
OTU_1743	Eukaryota	Opisthokonta	Fungi	Basidiomycota	Agaricomycotina	Agaricomycetes	Baeospora	Baeospora_myosura	0	0	0	0	0	0	0	0	0	0	0	0	0	0	0	0	0	0	0	0	0	0	0	0	0	0	0	0	0	0	3	0	0	0
OTU_1744	Eukaryota	Opisthokonta	Fungi	Basidiomycota	Agaricomycotina	Agaricomycetes	Agaricomycetes_X	Agaricomycetes_X_sp.	0	0	0	0	0	0	0	0	0	0	3	0	0	0	0	0	0	0	0	0	0	0	0	0	0	0	0	0	0	0	0	0	0	0
OTU_1745	Eukaryota	Opisthokonta	Fungi	Chytridiomycota	Chytridiomycotina	Neocallimastigomycetes	Neocallimastigomycetes_X	Neocallimastigomycetes_X_sp.	0	0	0	0	0	0	0	0	0	0	0	0	0	0	0	0	0	0	0	0	0	0	0	0	0	0	0	0	0	0	0	4	0	0
OTU_1746	Eukaryota	Alveolata	Dinophyta	Dinophyceae	Dinophyceae_X	Dinophyceae_XX	Multi-affiliation	Multi-affiliation	0	0	0	0	0	0	0	0	0	0	0	0	0	0	0	0	3	0	0	0	0	0	0	0	0	0	0	0	0	0	0	0	0	0
OTU_1747	Eukaryota	Alveolata	Dinophyta	Dinophyceae	Suessiales	Suessiales_X	Suessiales_XX	Suessiales_XX_sp.	0	3	0	0	0	0	0	0	0	0	0	0	0	0	0	0	0	0	0	0	0	0	0	0	0	0	0	0	0	0	0	0	0	0
OTU_1752	Eukaryota	Alveolata	Dinophyta	Syndiniales	Dino-Group-II	Dino-Group-II-Clade-16	Dino-Group-II-Clade-16_X	Dino-Group-II-Clade-16_X_sp.	0	0	0	0	0	0	0	0	0	0	0	1	0	0	0	0	0	0	0	1	0	0	0	0	0	0	0	0	0	0	0	0	2	0
OTU_1758	Eukaryota	Alveolata	Dinophyta	Dinophyceae	Multi-affiliation	Multi-affiliation	Multi-affiliation	Multi-affiliation	0	0	0	0	0	0	0	0	0	0	0	0	0	0	0	0	0	0	0	0	0	0	0	0	0	0	0	0	0	0	1	0	0	0
OTU_1759	Eukaryota	Alveolata	Dinophyta	Syndiniales	Dino-Group-II	Multi-affiliation	Multi-affiliation	Multi-affiliation	0	0	0	0	0	0	0	0	0	0	0	0	0	0	0	0	4	0	0	0	0	0	0	0	0	0	0	0	0	0	0	0	0	0
OTU_1760	Eukaryota	Alveolata	Dinophyta	Dinophyceae	Dinophyceae_X	Pfiesteriaceae	Stoeckeria	Stoeckeria_sp.	0	0	0	0	0	0	0	0	0	0	0	0	0	0	0	0	0	0	0	0	1	0	0	0	0	0	0	0	0	0	0	0	0	0
OTU_1771	Eukaryota	Multi-affiliation	Multi-affiliation	Multi-affiliation	Multi-affiliation	Multi-affiliation	Multi-affiliation	Multi-affiliation	0	0	0	0	0	3	0	0	0	0	0	0	0	0	0	0	0	0	0	0	0	0	0	0	0	0	0	0	0	0	0	0	0	0
OTU_1772	Eukaryota	Stramenopiles	Ochrophyta	Bacillariophyta	Bacillariophyta_X	Polar-centric-Mediophyceae	Minidiscus	Multi-affiliation	0	0	0	0	0	0	0	0	0	0	0	0	0	0	0	0	0	0	0	0	0	0	0	0	3	0	0	0	0	0	0	0	0	0
OTU_1777	Eukaryota	Alveolata	Ciliophora	Spirotrichea	Protocruziida	Protocruziida_X	Protocruzia	Multi-affiliation	0	0	0	0	4	0	0	0	0	0	0	0	0	0	0	0	0	0	0	0	0	0	0	0	0	0	0	0	0	0	0	0	0	0
OTU_1778	Eukaryota	Rhizaria	Cercozoa	Filosa-Granofilosea	Cryptofilida	Nanofilidae	Nanofila	Nanofila_sp.	0	0	0	0	0	0	0	0	0	0	0	0	0	0	0	0	0	0	0	0	0	0	3	0	0	0	0	0	0	0	0	0	0	0
OTU_1781	Eukaryota	Alveolata	Dinophyta	Dinophyceae	Suessiales	Suessiales_X	Suessiales_XX	Suessiales_XX_sp.	0	0	0	0	0	0	0	0	0	0	0	0	0	0	0	0	0	0	0	0	0	0	0	0	0	0	0	0	0	0	0	0	3	0
OTU_1784	Eukaryota	Amoebozoa	Lobosa	Discosea-Flabellinia	Dactylopodida	Paramoebidae	Neoparamoeba	Neoparamoeba_pemaquidensis	0	0	0	0	0	0	0	0	0	0	0	0	0	0	0	0	0	0	0	0	0	3	0	0	0	0	0	0	0	0	0	0	0	0
OTU_1785	Eukaryota	Amoebozoa	Lobosa	Discosea-Flabellinia	Dactylopodida	Paramoebidae	Neoparamoeba	Neoparamoeba_pemaquidensis	0	0	0	0	0	0	0	0	0	0	0	0	0	0	0	0	0	0	0	0	3	0	0	0	0	0	0	0	0	0	0	0	0	0
OTU_1786	Eukaryota	Amoebozoa	Lobosa	Discosea-Flabellinia	Dactylopodida	Paramoebidae	Neoparamoeba	Neoparamoeba_pemaquidensis	0	0	0	0	0	0	0	0	0	0	0	0	0	0	0	0	0	0	0	0	0	9	0	0	0	0	0	0	0	0	0	0	0	0
OTU_1787	Eukaryota	Amoebozoa	Lobosa	Discosea-Flabellinia	Dactylopodida	Paramoebidae	Neoparamoeba	Neoparamoeba_pemaquidensis	0	0	0	0	0	0	0	0	0	0	0	0	0	0	0	0	0	0	0	0	0	3	0	0	0	0	0	0	0	0	0	0	0	0
OTU_1788	Eukaryota	Amoebozoa	Lobosa	Discosea-Flabellinia	Dactylopodida	Paramoebidae	Neoparamoeba	Neoparamoeba_pemaquidensis	0	0	0	0	0	0	0	0	0	0	0	0	0	0	0	0	0	0	0	0	0	4	0	0	0	0	0	0	0	0	0	0	0	0
OTU_1789	Eukaryota	Amoebozoa	Lobosa	Discosea-Flabellinia	Dactylopodida	Paramoebidae	Neoparamoeba	Neoparamoeba_pemaquidensis	0	0	0	0	0	0	0	0	0	0	0	0	0	0	0	0	0	0	0	0	0	3	0	0	0	0	0	0	0	0	0	0	0	0
OTU_1790	Eukaryota	Amoebozoa	Lobosa	Discosea-Flabellinia	Dactylopodida	Paramoebidae	Neoparamoeba	Neoparamoeba_pemaquidensis	0	0	0	0	0	0	0	0	0	0	0	0	0	0	0	0	0	0	0	0	3	0	0	0	0	0	0	0	0	0	0	0	0	0
OTU_1791	Eukaryota	Amoebozoa	Lobosa	Discosea-Flabellinia	Dactylopodida	Paramoebidae	Neoparamoeba	Neoparamoeba_pemaquidensis	0	0	0	0	0	0	0	0	0	0	0	0	0	0	0	0	0	0	0	0	0	3	0	0	0	0	0	0	0	0	0	0	0	0
OTU_1792	Eukaryota	Amoebozoa	Lobosa	Discosea-Flabellinia	Dactylopodida	Paramoebidae	Neoparamoeba	Neoparamoeba_pemaquidensis	0	0	0	0	0	0	0	0	0	0	0	0	0	0	0	0	0	0	0	0	2	5	0	0	0	0	0	0	0	0	0	0	0	0
OTU_1793	Eukaryota	Amoebozoa	Lobosa	Discosea-Flabellinia	Dactylopodida	Paramoebidae	Paramoeba	Paramoeba_atlantica	3	0	0	0	0	0	0	0	0	0	0	0	0	0	0	0	0	0	0	0	0	0	0	0	0	0	0	0	0	0	0	0	0	0
OTU_1794	Eukaryota	Amoebozoa	Lobosa	Discosea-Flabellinia	Dactylopodida	Paramoebidae	Neoparamoeba	Neoparamoeba_pemaquidensis	0	0	0	0	0	0	0	0	0	0	0	0	0	0	0	0	0	0	0	0	3	0	0	0	0	0	0	0	0	0	0	0	0	0
OTU_1797	Eukaryota	Amoebozoa	Lobosa	Tubulinea	Euamoebida	Hartmannellidae	Copromyxa	Copromyxa_protea	0	0	0	0	1	0	0	0	0	0	0	0	0	0	0	0	0	0	0	0	0	0	0	0	0	0	0	0	0	0	0	0	0	0
OTU_1798	Eukaryota	Alveolata	Ciliophora	Oligohymenophorea	Mobilida	Trichodinidae	Trichodina	Trichodina_sinonovaculae	0	0	1	0	0	0	0	0	0	0	0	0	2	1	0	0	0	0	0	0	0	0	0	0	0	0	0	0	0	0	0	0	0	0
OTU_1802	Eukaryota	Stramenopiles	Ochrophyta	Bacillariophyta	Bacillariophyta_X	Raphid-pennate	Multi-affiliation	Multi-affiliation	0	0	0	0	0	0	0	0	0	0	0	0	0	3	0	0	0	0	0	0	0	0	0	0	0	0	0	0	0	0	0	0	0	0
OTU_1805	Eukaryota	Alveolata	Ciliophora	Oligohymenophorea	Scuticociliatia	Orchitophryidae	Mesanophrys	Mesanophrys_carcini	0	0	0	0	0	0	0	0	0	0	3	0	0	0	0	0	0	0	0	0	0	0	0	0	0	0	0	0	0	0	0	0	0	0
OTU_1807	Eukaryota	Alveolata	Ciliophora	Spirotrichea	Choreotrichia	Dictyocystidae	Codonellopsis	Codonellopsis_nipponica	0	0	0	0	0	0	0	0	0	0	0	0	0	0	0	0	0	3	0	0	0	0	0	0	0	0	0	0	0	0	0	0	0	0
OTU_1808	Eukaryota	Alveolata	Ciliophora	Spirotrichea	Choreotrichia	Dictyocystidae	Codonellopsis	Codonellopsis_nipponica	0	0	0	0	0	0	0	0	0	0	0	0	0	0	0	0	0	0	3	0	0	0	0	0	0	0	0	0	0	0	0	0	0	0
OTU_1809	Eukaryota	Alveolata	Ciliophora	Spirotrichea	Choreotrichia	Dictyocystidae	Codonellopsis	Codonellopsis_nipponica	0	0	0	0	0	0	0	0	0	0	0	0	0	0	0	0	0	0	2	0	0	0	0	0	0	0	0	0	0	0	0	0	0	0
OTU_1811	Eukaryota	Stramenopiles	Ochrophyta	Bacillariophyta	Bacillariophyta_X	Polar-centric-Mediophyceae	Thalassiosira	Thalassiosira_oceanica	0	0	0	0	0	0	0	0	0	0	0	0	0	0	0	0	0	0	0	0	0	0	0	0	3	0	0	0	0	0	0	0	0	0
OTU_1812	Eukaryota	Archaeplastida	Chlorophyta	Multi-affiliation	Multi-affiliation	Multi-affiliation	Multi-affiliation	Multi-affiliation	0	0	0	0	0	0	0	0	0	0	0	0	0	0	0	0	0	0	0	0	0	0	0	3	0	0	0	0	0	0	0	0	0	0
OTU_1813	Eukaryota	Archaeplastida	Chlorophyta	Multi-affiliation	Multi-affiliation	Multi-affiliation	Multi-affiliation	Multi-affiliation	0	0	0	0	0	0	0	0	0	0	0	0	0	0	0	0	0	0	0	0	0	0	0	3	0	0	0	0	0	0	0	0	0	0
OTU_1817	Eukaryota	Alveolata	Dinophyta	Dinophyceae	Dinophyceae_X	Pfiesteriaceae	Multi-affiliation	Multi-affiliation	3	0	0	0	0	0	0	0	0	0	0	0	0	0	0	0	0	0	0	0	0	0	0	0	0	0	0	0	0	0	0	0	0	0
OTU_1820	Eukaryota	Alveolata	Dinophyta	Dinophyceae	Suessiales	Suessiales_X	Multi-affiliation	Multi-affiliation	0	0	0	0	0	0	0	0	0	0	0	0	0	0	0	0	0	0	0	0	0	0	0	0	0	0	0	0	3	0	0	0	0	0
OTU_1821	Eukaryota	Alveolata	Dinophyta	Dinophyceae	Suessiales	Suessiales_X	Pelagodinium	Pelagodinium_beii	0	0	0	0	0	3	0	0	0	0	0	0	0	0	0	0	0	0	0	0	0	0	0	0	0	0	0	0	0	0	0	0	0	0
OTU_1822	Eukaryota	Stramenopiles	Stramenopiles_X	Oomycota	Oomycota_X	Olpidophydiales	Olpidiopsis	Olpidiopsis_sp.	0	0	0	0	0	0	0	0	0	0	0	0	0	0	0	0	0	0	0	0	0	0	0	1	0	0	0	0	0	0	0	0	0	0
OTU_1824	Eukaryota	Alveolata	Dinophyta	Dinophyceae	Suessiales	Suessiales_X	Multi-affiliation	Multi-affiliation	0	0	0	0	0	0	0	0	0	0	0	0	0	0	0	0	0	0	0	0	0	0	0	0	0	3	0	0	0	0	0	0	0	0
OTU_1825	Eukaryota	Alveolata	Dinophyta	Dinophyceae	Suessiales	Suessiales_X	Polarella	Polarella_glacialis	0	0	0	0	0	0	0	0	0	0	0	0	0	0	0	0	0	0	0	0	0	0	0	0	0	0	0	0	3	0	0	0	0	0
OTU_1829	Eukaryota	Alveolata	Dinophyta	Dinophyceae	Dinophyceae_X	Dinophyceae_XX	Dinophyceae_XXX	Dinophyceae_XXX_sp.	0	0	0	0	0	0	0	0	3	0	0	0	0	0	0	0	0	0	0	0	0	0	0	0	0	0	0	0	0	0	0	0	0	0
OTU_1830	Eukaryota	Alveolata	Dinophyta	Dinophyceae	Dinophyceae_X	Dinophyceae_XX	Scrippsiella	Scrippsiella_trochoidea	0	0	0	0	0	0	0	0	0	0	0	0	0	0	0	3	0	0	0	0	0	0	0	0	0	0	0	0	0	0	0	0	0	0
OTU_1831	Eukaryota	Alveolata	Dinophyta	Dinophyceae	Dinophyceae_X	Dinophyceae_XX	Dinophyceae_XXX	Dinophyceae_XXX_sp.	0	0	0	0	0	0	0	0	0	0	0	0	1	0	0	0	0	0	0	0	0	0	0	0	0	0	0	0	1	0	0	0	0	0
OTU_1833	Eukaryota	Alveolata	Dinophyta	Dinophyceae	Suessiales	Suessiales_X	Suessiales_XX	Suessiales_XX_sp.	0	0	0	0	0	0	0	0	3	0	0	0	0	0	0	0	0	0	0	0	0	0	0	0	0	0	0	0	0	0	0	0	0	0
OTU_1834	Eukaryota	Alveolata	Dinophyta	Dinophyceae	Dinophyceae_X	Dinophyceae_XX	Gymnodinium	Gymnodinium_sp.	0	0	0	0	0	0	0	0	0	0	0	0	0	0	0	0	0	0	0	3	0	0	0	0	0	0	0	0	0	0	0	0	0	0
OTU_1838	Eukaryota	Alveolata	Dinophyta	Dinophyceae	Dinophyceae_X	Dinophyceae_XX	Multi-affiliation	Multi-affiliation	3	0	0	0	0	0	0	0	0	0	0	0	0	0	0	0	0	0	0	0	0	0	0	0	0	0	0	0	0	0	0	0	0	0
OTU_1839	Eukaryota	Alveolata	Dinophyta	Dinophyceae	Dinophyceae_X	Dinophyceae_XX	Multi-affiliation	Multi-affiliation	0	0	0	0	0	0	0	0	0	0	0	0	0	0	0	0	0	0	0	0	0	0	0	0	0	0	0	0	0	3	0	0	0	0
OTU_1840	Eukaryota	Alveolata	Dinophyta	Dinophyceae	Dinophyceae_X	Multi-affiliation	Multi-affiliation	Multi-affiliation	0	0	0	0	0	0	0	0	0	0	0	0	0	0	0	0	0	0	0	0	0	0	0	0	1	0	0	0	0	0	0	0	0	0
OTU_1851	Eukaryota	Rhizaria	Cercozoa	Filosa-Thecofilosea	Cryomonadida	Protaspa-lineage	Protaspa	Protaspa_longipes	0	0	0	0	0	0	0	0	0	0	0	0	0	0	0	0	0	0	0	0	0	0	0	3	0	0	0	0	0	0	0	0	0	0
OTU_1855	Eukaryota	Amoebozoa	Lobosa	Discosea-Flabellinia	Dactylopodida	Paramoebidae	Neoparamoeba	Neoparamoeba_pemaquidensis	0	0	0	0	0	0	0	0	0	0	0	0	0	0	0	0	0	0	0	0	3	0	0	0	0	0	0	0	0	0	0	0	0	0
OTU_1856	Eukaryota	Amoebozoa	Lobosa	Discosea-Flabellinia	Dactylopodida	Paramoebidae	Neoparamoeba	Neoparamoeba_pemaquidensis	0	0	0	0	0	0	0	0	0	0	0	0	0	0	0	0	0	0	0	0	0	3	0	0	0	0	0	0	0	0	0	0	0	0
OTU_1857	Eukaryota	Amoebozoa	Lobosa	Discosea-Flabellinia	Dactylopodida	Paramoebidae	Neoparamoeba	Neoparamoeba_pemaquidensis	0	0	0	0	0	0	0	0	0	0	0	0	0	0	0	0	0	0	0	0	0	3	0	0	0	0	0	0	0	0	0	0	0	0
OTU_1858	Eukaryota	Rhizaria	Cercozoa	Filosa-Granofilosea	Filosa-Granofilosea_X	Massiteriidae	Multi-affiliation	Multi-affiliation	0	0	0	0	0	0	0	3	0	0	0	0	0	0	0	0	0	0	0	0	0	0	0	0	0	0	0	0	0	0	0	0	0	0
OTU_1866	Eukaryota	Alveolata	Ciliophora	Litostomatea	Haptoria	Litonotidae	Litonotidae_X	Litonotidae_X_sp.	0	0	0	0	0	0	0	0	0	0	0	0	0	0	0	0	0	0	0	0	0	0	0	0	0	0	0	0	0	0	2	0	0	0
OTU_1871	Eukaryota	Rhizaria	Cercozoa	Endomyxa-Ascetosporea	Haplosporida	Haplosporidiidae	Haplosporidium	Haplosporidium_nelsoni	0	0	0	0	0	0	0	0	2	0	0	0	0	0	0	0	0	0	0	0	0	0	0	0	0	0	0	0	0	0	0	0	0	0
OTU_1872	Eukaryota	Alveolata	Dinophyta	Dinophyceae	Dinophyceae_X	Pfiesteriaceae	Pfiesteriaceae_X	Pfiesteriaceae_X_sp.	0	0	0	0	0	0	0	0	0	0	0	0	0	0	0	0	0	0	0	0	0	0	0	0	0	0	0	0	2	0	0	0	0	0
OTU_1876	Eukaryota	Stramenopiles	Ochrophyta	Bacillariophyta	Bacillariophyta_X	Polar-centric-Mediophyceae	Multi-affiliation	Multi-affiliation	0	0	0	0	0	0	0	0	0	0	0	0	0	0	0	0	0	0	0	0	0	0	0	2	0	0	0	0	0	0	0	0	0	0
OTU_1877	Eukaryota	Alveolata	Ciliophora	Phyllopharyngea	Cyrtophoria	Hartmannulidae	Heterohartmannula	Heterohartmannula_fangi	0	0	0	0	0	0	0	0	0	0	0	0	0	0	0	0	0	2	0	0	0	0	0	0	0	0	0	0	0	0	0	0	0	0
OTU_1880	Eukaryota	Alveolata	Ciliophora	Spirotrichea	Choreotrichia	Choreotrichia-1	Choreotrichia-1_X	Choreotrichia-1_X_sp.	0	0	0	0	0	0	0	0	0	0	0	0	0	0	0	0	0	0	0	0	0	0	0	0	0	0	0	0	0	0	0	2	0	0
OTU_1882	Eukaryota	Alveolata	Ciliophora	Phyllopharyngea	Suctoria	Acinetidae	Acineta	Acineta_tuberosa	0	0	0	0	0	0	0	0	0	0	0	0	0	0	0	0	0	0	0	0	0	0	2	0	0	0	0	0	0	0	0	0	0	0
OTU_1883	Eukaryota	Alveolata	Ciliophora	Oligohymenophorea	Mobilida	Trichodinidae	Trichodina	Multi-affiliation	0	0	0	0	0	0	0	0	0	0	0	0	0	2	0	0	0	0	0	0	0	0	0	0	0	0	0	0	0	0	0	0	0	0
OTU_1884	Eukaryota	Alveolata	Ciliophora	Oligohymenophorea	Mobilida	Trichodinidae	Trichodina	Trichodina_sinonovaculae	0	0	0	0	0	0	0	0	0	0	0	0	0	0	0	0	0	0	0	0	0	0	0	0	0	0	0	0	0	0	0	0	0	2
OTU_1885	Eukaryota	Alveolata	Ciliophora	Oligohymenophorea	Mobilida	Trichodinidae	Trichodina	Trichodina_sinonovaculae	0	0	2	0	0	0	0	0	0	0	0	0	0	0	0	0	0	0	0	0	0	0	0	0	0	0	0	0	0	0	0	0	0	0
OTU_1886	Eukaryota	Alveolata	Ciliophora	Oligohymenophorea	Mobilida	Trichodinidae	Trichodina	Trichodina_sinonovaculae	2	0	0	0	0	0	0	0	0	0	0	0	0	0	0	0	0	0	0	0	0	0	0	0	0	0	0	0	0	0	0	0	0	0
OTU_1887	Eukaryota	Alveolata	Ciliophora	Oligohymenophorea	Mobilida	Trichodinidae	Trichodina	Trichodina_ruditapicis	0	0	1	0	0	0	0	0	0	0	0	1	1	1	0	0	0	0	0	0	0	0	0	0	1	0	0	0	0	0	0	0	0	0
OTU_1899	Eukaryota	Alveolata	Apicomplexa	Apicomplexa_X	Gregarines	Gregarines_X	Gregarinidae	Gregarinidae_sp.	0	0	0	0	0	0	0	0	0	0	0	0	0	0	0	0	0	0	0	0	0	0	3	0	0	0	0	0	0	0	0	0	0	0
OTU_1913	Eukaryota	Alveolata	Ciliophora	Oligohymenophorea	Peritrichia	Zoothamniidae	Zoothamnopsis	Zoothamnopsis_sinica	0	0	0	0	0	0	0	0	0	0	0	0	0	0	0	0	0	0	0	0	0	0	2	0	0	0	0	0	0	0	0	0	0	0
OTU_1922	Eukaryota	Alveolata	Ciliophora	Oligohymenophorea	Peritrichia	Zoothamniidae	Zoothamnopsis	Zoothamnopsis_sinica	0	2	0	0	0	0	0	0	0	0	0	0	0	0	0	0	0	0	0	0	0	0	0	0	0	0	0	0	0	0	0	0	0	0
OTU_1925	Eukaryota	Alveolata	Apicomplexa	Apicomplexa_X	Gregarines	Gregarines_X	Gregarines_XX	Gregarines_XX_sp.	0	0	0	0	0	0	0	0	0	0	0	0	0	0	2	0	0	0	0	0	0	0	0	0	0	0	0	0	0	0	0	0	0	0
OTU_1926	Eukaryota	Alveolata	Apicomplexa	Apicomplexa_X	Gregarines	Gregarines_X	Gregarines_XX	Gregarines_XX_sp.	0	0	0	0	0	0	0	0	0	0	0	0	0	0	2	0	0	0	0	0	0	0	0	0	0	0	0	0	0	0	0	0	0	0
OTU_1928	Eukaryota	Alveolata	Ciliophora	Oligohymenophorea	Peritrichia	Zoothamniidae	Zoothamnium	Multi-affiliation	0	0	0	0	0	0	0	0	0	0	0	0	0	0	0	0	0	0	0	0	0	0	0	0	0	0	0	0	2	0	0	0	0	0
OTU_1929	Eukaryota	Alveolata	Ciliophora	Oligohymenophorea	Peritrichia	Zoothamniidae	Zoothamnium	Zoothamnium_pelagicum	0	0	0	0	0	0	0	2	0	0	0	0	0	0	0	0	0	0	0	0	0	0	0	0	0	0	0	0	0	0	0	0	0	0
OTU_1931	Eukaryota	Alveolata	Ciliophora	Oligohymenophorea	Peritrichia	Zoothamniidae	Zoothamnium	Zoothamnium_pelagicum	0	0	0	0	0	0	0	2	0	0	0	0	0	0	0	0	0	0	0	0	0	0	0	0	0	0	0	0	0	0	0	0	0	0
OTU_1932	Eukaryota	Alveolata	Ciliophora	Oligohymenophorea	Peritrichia	Zoothamniidae	Zoothamnium	Zoothamnium_pelagicum	0	0	0	0	0	0	0	2	0	0	0	1	0	0	0	0	0	0	0	0	0	0	0	0	0	0	0	0	0	0	0	0	0	0
OTU_1933	Eukaryota	Alveolata	Ciliophora	Oligohymenophorea	Peritrichia	Zoothamniidae	Zoothamnium	Zoothamnium_pelagicum	0	0	0	0	0	0	0	2	0	0	0	0	0	0	0	0	0	0	0	0	0	0	0	0	0	0	0	0	0	0	0	0	0	0
OTU_1934	Eukaryota	Alveolata	Ciliophora	Oligohymenophorea	Peritrichia	Zoothamniidae	Zoothamnium	Zoothamnium_pelagicum	0	0	0	0	0	0	0	1	0	0	0	0	0	0	0	0	0	0	0	0	0	0	0	0	0	0	0	0	0	0	0	0	0	0
OTU_1937	Eukaryota	Alveolata	Ciliophora	Phyllopharyngea	Suctoria	Acinetidae	Acineta	Acineta_tuberosa	0	0	0	0	3	0	0	0	0	0	0	0	0	0	0	0	0	0	0	0	0	0	0	0	0	0	0	0	0	0	0	0	0	0
OTU_1954	Eukaryota	Alveolata	Dinophyta	Dinophyceae	Dinophyceae_X	Pfiesteriaceae	Pfiesteriaceae_X	Pfiesteriaceae_X_sp.	0	3	0	0	0	0	0	0	0	0	0	0	0	0	0	0	0	0	0	0	0	0	0	0	0	0	0	0	0	0	0	0	0	0
OTU_1956	Eukaryota	Alveolata	Ciliophora	Oligohymenophorea	Sessilida	Vorticellidae	Pseudovorticella	Pseudovorticella_punctata	0	0	0	0	0	0	0	0	0	0	0	0	1	0	0	0	0	0	0	0	0	0	0	0	0	0	0	0	0	0	0	0	0	0
OTU_1958	Eukaryota	Stramenopiles	Ochrophyta	Bacillariophyta	Bacillariophyta_X	Raphid-pennate	Multi-affiliation	Multi-affiliation	0	0	0	0	0	0	0	0	0	0	0	0	0	0	0	0	0	0	0	0	0	0	3	0	0	0	0	0	0	0	0	0	0	0
OTU_1962	Eukaryota	Opisthokonta	Fungi	Ascomycota	Saccharomycotina	Saccharomycetales	Metschnikowia	Metschnikowia_zobellii	0	0	0	0	0	0	0	0	0	0	0	0	0	0	2	0	0	0	0	0	0	0	0	0	0	0	0	0	0	0	0	0	0	0
OTU_1975	Eukaryota	Alveolata	Dinophyta	Dinophyceae	Dinophyceae_X	Dinophyceae_XX	Gymnodinium	Gymnodinium_sp.	0	0	0	0	0	0	0	0	0	0	0	0	0	2	0	0	0	0	0	0	0	0	0	0	0	0	0	0	0	0	0	0	0	0
OTU_1995	Eukaryota	Alveolata	Ciliophora	Spirotrichea	Choreotrichia	Dictyocystidae	Codonellopsis	Codonellopsis_nipponica	0	0	0	0	0	0	0	0	0	0	0	0	0	0	0	0	2	0	0	0	0	0	0	0	0	0	0	0	0	0	0	0	0	0
OTU_2001	Eukaryota	Alveolata	Ciliophora	Spirotrichea	Choreotrichia	Dictyocystidae	Codonellopsis	Codonellopsis_nipponica	0	0	0	0	0	0	0	0	0	0	0	0	0	0	0	0	2	0	0	0	0	0	0	0	0	0	0	0	0	0	0	0	0	0
OTU_2003	Eukaryota	Alveolata	Ciliophora	Spirotrichea	Choreotrichia	Dictyocystidae	Codonellopsis	Codonellopsis_nipponica	0	0	0	0	0	1	0	0	0	0	0	0	0	0	0	0	0	0	2	0	0	0	0	0	0	0	0	0	0	0	0	0	0	0
OTU_2004	Eukaryota	Alveolata	Ciliophora	Spirotrichea	Choreotrichia	Dictyocystidae	Codonellopsis	Codonellopsis_nipponica	0	0	0	0	0	0	0	0	0	0	0	0	0	0	0	0	0	0	2	0	0	0	0	0	0	0	0	0	0	0	0	0	0	0
OTU_2006	Eukaryota	Alveolata	Ciliophora	Spirotrichea	Choreotrichia	Dictyocystidae	Codonellopsis	Codonellopsis_nipponica	0	0	0	0	0	0	0	0	0	0	0	0	0	0	0	0	0	2	0	0	0	0	0	0	0	0	0	0	0	0	0	0	0	0
OTU_2007	Eukaryota	Alveolata	Ciliophora	Spirotrichea	Choreotrichia	Dictyocystidae	Codonellopsis	Codonellopsis_nipponica	0	0	0	0	0	0	0	0	0	0	0	0	0	0	0	0	2	0	0	0	0	0	0	0	0	0	0	0	0	0	0	0	0	0
OTU_2009	Eukaryota	Opisthokonta	Choanoflagellida	Choanoflagellatea	Acanthoecida	Stephanoecidae_Group_I	Stephanoeca_Group_I	Stephanoeca_diplocostata	0	0	0	0	0	0	0	0	0	0	0	0	0	0	0	0	0	0	0	0	0	2	0	0	0	0	0	0	0	0	0	0	0	0
OTU_2010	Eukaryota	Alveolata	Ciliophora	Spirotrichea	Choreotrichia	Dictyocystidae	Codonellopsis	Codonellopsis_nipponica	0	0	0	0	0	3	0	0	0	0	0	0	0	0	0	0	0	0	0	0	0	0	0	0	0	0	0	0	0	0	0	0	0	0
OTU_2011	Eukaryota	Alveolata	Ciliophora	Spirotrichea	Choreotrichia	Dictyocystidae	Codonellopsis	Codonellopsis_nipponica	0	0	0	0	0	0	0	0	0	0	0	0	0	0	0	0	0	0	0	0	0	0	0	0	0	2	0	0	0	0	0	0	0	0
OTU_2012	Eukaryota	Alveolata	Ciliophora	Spirotrichea	Choreotrichia	Dictyocystidae	Codonellopsis	Codonellopsis_nipponica	0	0	0	0	0	0	2	0	0	0	0	0	0	0	0	0	0	0	0	0	0	0	0	0	0	0	0	0	0	0	0	0	0	0
OTU_2013	Eukaryota	Alveolata	Ciliophora	Spirotrichea	Choreotrichia	Dictyocystidae	Codonellopsis	Codonellopsis_nipponica	0	0	0	0	0	0	2	0	0	0	0	0	0	0	0	0	0	0	0	0	0	0	0	0	0	0	0	0	0	0	0	0	0	0
OTU_2014	Eukaryota	Alveolata	Ciliophora	Spirotrichea	Choreotrichia	Dictyocystidae	Codonellopsis	Codonellopsis_nipponica	0	0	0	0	0	0	0	0	0	0	0	0	0	0	0	0	0	0	2	0	0	0	0	0	0	0	0	0	0	0	0	0	0	0
OTU_2015	Eukaryota	Alveolata	Ciliophora	Spirotrichea	Choreotrichia	Dictyocystidae	Codonellopsis	Codonellopsis_nipponica	2	0	0	0	0	0	0	0	0	0	0	0	0	0	0	0	0	0	0	0	0	0	0	0	0	0	0	0	0	0	0	0	0	0
OTU_2016	Eukaryota	Alveolata	Ciliophora	Spirotrichea	Choreotrichia	Dictyocystidae	Codonellopsis	Codonellopsis_nipponica	0	0	0	0	0	0	0	0	0	0	2	0	0	0	0	0	0	0	0	0	0	0	0	0	0	0	0	0	0	0	0	0	0	0
OTU_2018	Eukaryota	Alveolata	Ciliophora	Spirotrichea	Choreotrichia	Dictyocystidae	Codonellopsis	Codonellopsis_nipponica	0	0	0	0	0	2	0	0	0	0	0	0	0	0	0	0	0	0	0	0	0	0	0	0	0	0	0	0	0	0	0	0	0	0
OTU_2019	Eukaryota	Alveolata	Ciliophora	Spirotrichea	Choreotrichia	Dictyocystidae	Codonellopsis	Codonellopsis_nipponica	0	0	0	0	0	0	0	0	0	0	0	0	0	0	0	0	0	0	3	0	0	0	0	0	0	0	0	0	0	0	0	0	0	0
OTU_2020	Eukaryota	Alveolata	Ciliophora	Spirotrichea	Choreotrichia	Dictyocystidae	Codonellopsis	Codonellopsis_nipponica	0	0	0	0	0	0	0	0	0	0	0	0	0	0	0	0	2	0	0	0	0	0	0	0	0	0	0	0	0	0	0	0	0	0
OTU_2022	Eukaryota	Alveolata	Ciliophora	Spirotrichea	Choreotrichia	Dictyocystidae	Codonellopsis	Codonellopsis_nipponica	0	0	0	0	0	0	0	0	0	0	0	0	0	0	0	0	2	0	0	0	0	0	0	0	0	0	0	0	0	0	0	0	0	0
OTU_2023	Eukaryota	Alveolata	Ciliophora	Spirotrichea	Choreotrichia	Dictyocystidae	Codonellopsis	Codonellopsis_nipponica	0	0	0	0	0	0	0	0	0	0	0	0	0	0	0	0	0	2	0	0	0	0	0	0	0	0	0	0	0	0	0	0	0	0
OTU_2025	Eukaryota	Alveolata	Ciliophora	Spirotrichea	Choreotrichia	Dictyocystidae	Codonellopsis	Codonellopsis_nipponica	0	0	0	0	0	0	2	0	0	0	0	0	0	0	0	0	0	0	0	0	0	0	0	0	0	0	0	0	0	0	0	0	0	0
OTU_2026	Eukaryota	Alveolata	Ciliophora	Spirotrichea	Choreotrichia	Dictyocystidae	Codonellopsis	Codonellopsis_nipponica	0	0	0	0	0	0	0	0	0	0	0	0	0	0	0	0	0	2	0	0	0	0	0	0	0	0	0	0	0	0	0	0	0	0
OTU_2027	Eukaryota	Alveolata	Ciliophora	Spirotrichea	Choreotrichia	Dictyocystidae	Codonellopsis	Codonellopsis_nipponica	0	0	0	0	0	2	1	0	0	0	0	0	0	0	0	0	1	2	1	0	0	0	0	0	0	1	0	0	0	0	0	0	0	0
OTU_2028	Eukaryota	Alveolata	Ciliophora	Spirotrichea	Choreotrichia	Dictyocystidae	Codonellopsis	Codonellopsis_nipponica	0	0	0	0	0	0	0	0	0	0	0	0	0	0	0	0	0	0	2	0	0	0	0	0	0	0	0	0	0	0	0	0	0	0
OTU_2029	Eukaryota	Hacrobia	Haptophyta	Prymnesiophyceae	Isochrysidales	Noelaerhabdaceae	Emiliania_Gephyrocapsa	Emiliania_Gephyrocapsa_sp	0	0	0	0	0	0	0	0	0	0	0	0	0	0	0	2	0	0	0	0	0	0	0	0	0	0	0	0	0	0	0	0	0	0
OTU_2030	Eukaryota	Alveolata	Ciliophora	Spirotrichea	Choreotrichia	Dictyocystidae	Codonellopsis	Codonellopsis_nipponica	0	0	0	0	0	0	2	0	0	0	0	0	0	0	0	0	0	0	0	0	0	0	0	0	0	0	0	0	0	0	0	0	0	0
OTU_2031	Eukaryota	Alveolata	Ciliophora	Spirotrichea	Choreotrichia	Dictyocystidae	Codonellopsis	Codonellopsis_nipponica	0	0	0	0	0	0	0	0	0	0	0	0	0	0	0	0	0	0	2	0	0	0	0	0	0	0	0	0	0	0	0	0	0	0
OTU_2034	Eukaryota	Alveolata	Ciliophora	Spirotrichea	Choreotrichia	Dictyocystidae	Codonellopsis	Codonellopsis_nipponica	0	0	0	0	0	0	0	0	0	0	0	0	0	0	0	0	0	2	0	0	0	0	0	0	0	0	0	0	0	0	0	0	0	0
OTU_2036	Eukaryota	Alveolata	Dinophyta	Syndiniales	Dino-Group-II	Dino-Group-II-Clade-32	Dino-Group-II-Clade-32_X	Multi-affiliation	0	0	0	0	0	0	0	2	0	0	0	0	0	0	0	0	0	0	0	0	0	0	0	0	0	0	0	0	0	0	0	0	0	0
OTU_2037	Eukaryota	Alveolata	Ciliophora	Spirotrichea	Choreotrichia	Dictyocystidae	Codonellopsis	Codonellopsis_nipponica	0	0	0	0	0	0	2	0	0	0	0	0	0	0	0	0	0	0	0	0	0	0	0	0	0	0	0	0	0	0	0	0	0	0
OTU_2039	Eukaryota	Alveolata	Ciliophora	Spirotrichea	Choreotrichia	Tintinnidae	Tintinnopsis	Tintinnopsis_sp.	0	0	0	0	0	0	0	0	0	2	0	0	0	0	0	0	0	0	0	0	0	0	0	0	0	0	0	0	0	0	0	0	0	0
OTU_2040	Eukaryota	Alveolata	Ciliophora	Spirotrichea	Choreotrichia	Dictyocystidae	Codonellopsis	Codonellopsis_nipponica	0	0	0	0	0	0	0	0	0	0	0	0	0	0	0	0	2	0	0	0	0	0	0	0	0	0	0	0	0	0	0	0	0	0
OTU_2048	Eukaryota	Archaeplastida	Chlorophyta	Pyramimonadales	Pyramimonadales_X	Pyramimonadales_XX	Pyramimonas	Multi-affiliation	0	0	0	0	0	0	0	0	0	0	0	0	0	0	0	0	0	0	0	0	0	0	0	0	0	0	0	0	2	0	0	0	0	0
OTU_2054	Eukaryota	Alveolata	Dinophyta	Dinophyceae	Suessiales	Suessiales_X	Protodinium	Protodinium_simplex	0	0	0	0	0	0	0	0	0	0	0	0	0	0	0	0	0	0	0	0	0	0	0	0	0	0	0	0	0	0	0	0	0	2
OTU_2058	Eukaryota	Opisthokonta	Fungi	Basidiomycota	Ustilaginomycotina	Exobasidiomycetes	Tilletiopsis	Tilletiopsis_pallescens	0	0	0	0	0	0	0	0	0	0	0	0	0	0	0	0	2	0	0	0	0	0	0	0	0	0	0	0	0	0	0	0	0	0
OTU_2067	Eukaryota	Alveolata	Dinophyta	Dinophyceae	Suessiales	Suessiales_X	Multi-affiliation	Multi-affiliation	0	0	0	0	0	0	0	0	0	2	0	0	0	0	0	0	0	0	0	0	0	0	0	0	0	0	0	0	0	0	0	0	0	0
OTU_2073	Eukaryota	Archaeplastida	Chlorophyta	Ulvophyceae	Ulvales-relatives	Ulvales-relatives_X	Dilabifilum	Dilabifilum_sp.	0	0	0	0	0	0	0	0	0	0	0	0	0	0	0	0	0	0	0	0	0	0	0	2	0	0	0	0	0	0	0	0	0	0
OTU_2075	Eukaryota	Opisthokonta	Mesomycetozoa	Ichthyosporea	Ichthyosphonida	Pseudoperkinsidae	Multi-affiliation	Multi-affiliation	0	0	0	0	0	2	0	0	0	0	0	0	0	0	0	0	0	0	0	0	0	0	0	0	0	0	0	0	0	0	0	0	0	0
OTU_2076	Eukaryota	Alveolata	Dinophyta	Dinophyceae	Multi-affiliation	Multi-affiliation	Multi-affiliation	Multi-affiliation	0	0	0	0	0	0	0	0	0	0	0	0	2	0	0	0	0	0	0	0	0	0	0	0	0	0	0	0	0	0	0	0	0	0
OTU_2077	Eukaryota	Alveolata	Dinophyta	Syndiniales	Dino-Group-I	Dino-Group-I-Clade-1	Dino-Group-I-Clade-1_X	Dino-Group-I-Clade-1_X_sp.	0	0	0	0	0	0	0	0	0	0	0	0	0	0	0	0	0	0	0	0	0	0	0	0	0	0	0	0	2	0	0	0	0	0
OTU_2078	Eukaryota	Archaeplastida	Chlorophyta	Ulvophyceae	Ulotrichales	Ulotrichales_X	Urospora	Urospora_neglecta	0	0	0	0	0	0	0	0	0	0	0	0	0	0	0	0	0	0	0	0	0	0	0	0	0	0	0	0	2	0	0	0	0	0
OTU_2079	Eukaryota	Archaeplastida	Chlorophyta	Ulvophyceae	Ulotrichales	Ulotrichales_X	Urospora	Urospora_neglecta	0	0	0	0	0	0	0	0	0	0	0	0	0	0	0	0	0	0	0	0	0	0	0	0	0	0	0	0	2	0	0	0	0	0
OTU_2092	Eukaryota	Alveolata	Dinophyta	Syndiniales	Dino-Group-II	Dino-Group-II_X	Dino-Group-II_XX	Dino-Group-II_XX_sp.	0	0	0	0	0	0	0	0	0	0	0	2	0	0	0	0	0	0	0	0	0	0	0	0	0	0	0	0	0	0	0	0	0	0
OTU_2093	Eukaryota	Alveolata	Dinophyta	Dinophyceae	Dinophyceae_X	Dinophyceae_XX	Protoperidinium	Protoperidinium_bipes	0	0	0	0	0	0	0	0	0	0	0	0	0	0	0	0	0	0	0	0	0	0	0	0	0	0	2	0	0	0	0	0	0	0
OTU_2094	Eukaryota	Alveolata	Dinophyta	Dinophyceae	Dinophyceae_X	Dinophyceae_XX	Protoperidinium	Protoperidinium_bipes	3	0	0	0	0	0	0	0	0	0	0	0	0	0	0	0	0	0	0	0	0	0	0	0	0	0	0	0	0	0	0	0	0	0
OTU_2095	Eukaryota	Alveolata	Dinophyta	Dinophyceae	Dinophyceae_X	Dinophyceae_XX	Protoperidinium	Protoperidinium_bipes	0	0	0	0	0	0	0	0	0	0	0	0	0	0	0	0	0	0	0	0	0	0	0	0	0	0	2	0	0	0	0	0	0	0
OTU_2096	Eukaryota	Alveolata	Dinophyta	Dinophyceae	Dinophyceae_X	Dinophyceae_XX	Protoperidinium	Protoperidinium_bipes	0	0	0	0	0	0	0	0	0	0	0	0	0	0	0	0	0	0	0	0	0	0	0	0	3	0	0	0	0	0	0	0	0	0
OTU_2097	Eukaryota	Alveolata	Dinophyta	Dinophyceae	Dinophyceae_X	Dinophyceae_XX	Protoperidinium	Protoperidinium_bipes	0	0	0	0	0	0	0	0	0	0	0	0	0	0	0	0	0	0	0	2	0	0	0	0	0	0	0	0	0	0	0	0	0	0
OTU_2099	Eukaryota	Archaeplastida	Chlorophyta	Chlorodendrophyceae	Chlorodendrales	Chlorodendraceae	Tetraselmis	Tetraselmis_cordiformis	0	0	0	0	0	0	0	0	0	0	0	0	0	0	2	0	0	0	0	0	0	0	0	0	0	0	0	0	0	0	0	0	0	0
OTU_2100	Eukaryota	Stramenopiles	Ochrophyta	Bacillariophyta	Bacillariophyta_X	Polar-centric-Mediophyceae	Thalassiosira	Thalassiosira_oceanica	0	0	0	0	0	0	0	0	0	0	0	0	0	0	0	0	0	0	0	0	0	0	0	2	0	0	0	0	0	0	0	0	0	0
OTU_2106	Eukaryota	Archaeplastida	Chlorophyta	Multi-affiliation	Multi-affiliation	Multi-affiliation	Multi-affiliation	Multi-affiliation	0	0	0	0	0	0	0	0	0	0	0	0	0	0	0	0	0	0	0	0	0	0	0	2	0	0	0	0	0	0	0	0	0	0
OTU_2108	Eukaryota	Archaeplastida	Rhodophyta	Compsopogonophyceae	Erythropeltidales	Erythropeltidales_X	Smithora	Smithora_naiadum	0	0	0	0	0	0	0	0	0	0	0	0	0	0	0	0	0	0	0	0	0	0	0	2	0	0	0	0	0	0	0	0	0	0
OTU_2110	Eukaryota	Archaeplastida	Chlorophyta	Multi-affiliation	Multi-affiliation	Multi-affiliation	Multi-affiliation	Multi-affiliation	0	0	0	0	0	0	0	0	0	0	0	0	0	0	0	0	0	0	0	0	0	0	0	0	2	0	0	0	0	0	0	0	0	0
OTU_2111	Eukaryota	Archaeplastida	Chlorophyta	Multi-affiliation	Multi-affiliation	Multi-affiliation	Multi-affiliation	Multi-affiliation	0	0	0	0	2	0	0	0	0	0	0	0	0	0	0	0	0	0	0	0	0	0	0	0	0	0	0	0	0	0	0	0	0	0
OTU_2112	Eukaryota	Archaeplastida	Chlorophyta	Multi-affiliation	Multi-affiliation	Multi-affiliation	Multi-affiliation	Multi-affiliation	0	0	0	0	0	0	0	0	0	0	0	0	0	0	0	0	0	0	0	0	0	0	0	2	0	0	0	0	0	0	0	0	0	0
OTU_2113	Eukaryota	Archaeplastida	Chlorophyta	Chlorophyceae	Sphaeropleales	Multi-affiliation	Multi-affiliation	Multi-affiliation	0	0	0	0	0	0	0	0	0	0	0	0	0	0	0	0	0	0	0	0	0	0	0	0	0	2	0	0	0	0	0	0	0	0
OTU_2114	Eukaryota	Archaeplastida	Chlorophyta	Chlorophyceae	Sphaeropleales	Sphaeropleales_X	Ankistrodesmus	Ankistrodesmus_nannoselene	0	0	0	0	0	0	0	0	0	0	0	0	0	0	0	2	0	0	0	0	0	0	0	0	0	0	0	0	0	0	0	0	0	0
OTU_2119	Eukaryota	Alveolata	Dinophyta	Dinophyceae	Suessiales	Suessiales_X	Woloszynskia	Woloszynskia_sp._strain1	0	0	0	0	0	0	0	0	0	0	0	0	0	0	0	0	0	0	0	0	2	0	0	0	0	0	0	0	0	0	0	0	0	0
OTU_2126	Eukaryota	Alveolata	Dinophyta	Dinophyceae	Dinophyceae_X	Pfiesteriaceae	Multi-affiliation	Multi-affiliation	2	0	0	0	0	0	0	0	0	0	0	0	0	0	0	0	0	0	0	0	0	0	0	0	0	0	0	0	0	0	0	0	0	0
OTU_2129	Eukaryota	Alveolata	Dinophyta	Dinophyceae	Dinophyceae_X	Pfiesteriaceae	Multi-affiliation	Multi-affiliation	0	0	0	0	0	0	0	0	0	2	0	0	0	0	0	0	0	0	0	0	0	0	0	0	0	0	0	0	0	0	0	0	0	0
OTU_2130	Eukaryota	Alveolata	Dinophyta	Dinophyceae	Dinophyceae_X	Pfiesteriaceae	Multi-affiliation	Multi-affiliation	0	0	0	0	0	0	0	0	0	2	0	0	0	0	0	0	0	0	0	0	0	0	0	0	0	0	0	0	0	0	0	0	0	0
OTU_2138	Eukaryota	Alveolata	Dinophyta	Dinophyceae	Dinophyceae_X	Pfiesteriaceae	Multi-affiliation	Multi-affiliation	0	0	0	0	0	0	0	0	0	0	0	0	0	0	0	0	0	0	0	0	3	0	0	0	0	0	0	0	0	0	0	0	0	0
OTU_2139	Eukaryota	Alveolata	Dinophyta	Dinophyceae	Dinophyceae_X	Pfiesteriaceae	Multi-affiliation	Multi-affiliation	0	0	0	0	0	0	0	0	0	0	0	0	0	0	2	0	0	0	0	0	0	0	0	0	0	0	0	0	0	0	0	0	0	0
OTU_2146	Eukaryota	Alveolata	Dinophyta	Dinophyceae	Dinophyceae_X	Pfiesteriaceae	Multi-affiliation	Multi-affiliation	0	0	0	0	0	0	0	0	0	0	0	0	0	0	0	0	0	0	0	0	0	0	0	0	0	0	0	0	0	0	0	0	2	0
OTU_2147	Eukaryota	Alveolata	Dinophyta	Dinophyceae	Dinophyceae_X	Pfiesteriaceae	Multi-affiliation	Multi-affiliation	0	0	0	0	0	0	0	0	0	0	0	0	0	0	0	0	0	0	0	0	0	0	0	0	0	0	0	0	0	2	0	0	0	0
OTU_2157	Eukaryota	Alveolata	Dinophyta	Dinophyceae	Suessiales	Suessiales_X	Polarella	Polarella_glacialis	0	0	0	0	0	0	0	0	0	0	0	0	2	0	0	0	0	0	0	0	0	0	0	0	0	0	0	0	0	0	0	0	0	0
OTU_2162	Eukaryota	Alveolata	Dinophyta	Dinophyceae	Suessiales	Suessiales_X	Polarella	Polarella_glacialis	0	0	0	0	0	0	0	0	0	0	0	0	0	0	0	0	0	0	0	0	0	0	0	0	0	0	0	0	0	0	0	0	1	0
OTU_2166	Eukaryota	Alveolata	Dinophyta	Dinophyceae	Suessiales	Suessiales_X	Multi-affiliation	Multi-affiliation	0	0	0	0	0	0	2	0	0	0	0	0	0	0	0	0	0	0	0	0	0	0	0	0	0	0	0	0	0	0	0	0	0	0
OTU_2167	Eukaryota	Alveolata	Dinophyta	Dinophyceae	Dinophyceae_X	Pfiesteriaceae	Multi-affiliation	Multi-affiliation	0	0	0	0	0	0	0	0	0	2	0	0	0	0	0	0	0	0	0	0	0	0	0	0	0	0	0	0	0	0	0	0	0	0
OTU_2173	Eukaryota	Alveolata	Dinophyta	Dinophyceae	Suessiales	Suessiales_X	Multi-affiliation	Multi-affiliation	2	0	0	0	0	0	0	0	0	0	0	0	0	0	0	0	0	0	0	0	0	0	0	0	0	0	0	0	0	0	0	0	0	0
OTU_2175	Eukaryota	Alveolata	Dinophyta	Dinophyceae	Suessiales	Suessiales_X	Multi-affiliation	Multi-affiliation	0	0	0	2	0	0	0	0	0	0	0	0	0	0	0	0	0	0	0	0	0	0	0	0	0	0	0	0	0	0	0	0	0	0
OTU_2176	Eukaryota	Alveolata	Dinophyta	Dinophyceae	Suessiales	Suessiales_X	Multi-affiliation	Multi-affiliation	0	0	0	0	0	0	0	0	0	0	0	0	0	0	0	0	0	0	0	0	0	0	0	0	0	0	0	2	0	0	0	0	0	0
OTU_2177	Eukaryota	Multi-affiliation	Multi-affiliation	Multi-affiliation	Multi-affiliation	Multi-affiliation	Multi-affiliation	Multi-affiliation	0	0	0	0	0	0	0	0	0	0	0	0	0	0	0	0	0	0	0	0	0	0	0	0	0	2	0	0	0	0	0	0	0	0
OTU_2185	Eukaryota	Alveolata	Dinophyta	Dinophyceae	Suessiales	Suessiales_X	Multi-affiliation	Multi-affiliation	0	2	0	0	0	0	0	0	0	0	0	0	0	0	0	0	0	0	0	0	0	0	0	0	0	0	0	0	0	0	0	0	0	0
OTU_2187	Eukaryota	Alveolata	Dinophyta	Dinophyceae	Suessiales	Suessiales_X	Multi-affiliation	Multi-affiliation	0	0	0	0	0	0	0	0	0	0	0	0	0	0	0	0	0	0	0	0	0	0	0	0	0	0	0	0	0	0	0	2	0	0
OTU_2188	Eukaryota	Alveolata	Dinophyta	Dinophyceae	Suessiales	Suessiales_X	Multi-affiliation	Multi-affiliation	0	0	0	0	0	0	0	0	0	0	0	0	0	0	0	0	0	0	0	0	0	0	0	0	0	0	0	0	0	0	0	0	0	2
OTU_2189	Eukaryota	Alveolata	Dinophyta	Dinophyceae	Suessiales	Suessiales_X	Polarella	Polarella_glacialis	0	0	0	0	0	0	0	0	0	0	0	0	0	0	0	0	0	0	0	0	2	0	0	0	0	0	0	0	0	0	0	0	0	0
OTU_2190	Eukaryota	Alveolata	Dinophyta	Dinophyceae	Suessiales	Suessiales_X	Multi-affiliation	Multi-affiliation	0	0	0	0	0	0	0	2	0	0	0	0	0	0	0	0	0	0	0	0	0	0	0	0	0	0	0	0	0	0	0	0	0	0
OTU_2191	Eukaryota	Alveolata	Dinophyta	Dinophyceae	Suessiales	Suessiales_X	Multi-affiliation	Multi-affiliation	0	0	0	0	0	0	0	0	0	0	0	0	0	0	0	0	0	0	0	0	0	0	0	0	0	0	0	0	0	0	0	0	2	0
OTU_2193	Eukaryota	Alveolata	Dinophyta	Dinophyceae	Suessiales	Suessiales_X	Multi-affiliation	Multi-affiliation	0	0	0	0	0	0	0	0	0	0	0	0	0	0	0	0	0	0	0	0	0	0	0	0	0	0	0	0	0	0	3	0	0	0
OTU_2194	Eukaryota	Alveolata	Dinophyta	Dinophyceae	Suessiales	Suessiales_X	Multi-affiliation	Multi-affiliation	0	0	0	0	0	0	0	0	0	0	0	0	0	0	0	0	2	0	0	0	0	0	0	0	0	0	0	0	0	0	0	0	0	0
OTU_2196	Eukaryota	Alveolata	Dinophyta	Dinophyceae	Suessiales	Suessiales_X	Multi-affiliation	Multi-affiliation	0	0	0	0	0	0	0	2	0	0	0	0	0	0	0	0	0	0	0	0	0	0	0	0	0	0	0	0	0	0	0	0	0	0
OTU_2197	Eukaryota	Alveolata	Dinophyta	Dinophyceae	Suessiales	Suessiales_X	Multi-affiliation	Multi-affiliation	0	0	0	0	0	0	0	0	0	0	0	0	0	0	0	0	0	0	0	0	0	3	0	0	0	0	0	0	0	0	0	0	0	0
OTU_2198	Eukaryota	Alveolata	Dinophyta	Dinophyceae	Suessiales	Suessiales_X	Multi-affiliation	Multi-affiliation	0	0	0	0	0	0	0	2	0	0	0	0	0	0	0	0	0	0	0	0	0	0	0	0	0	0	0	0	0	0	0	0	0	0
OTU_2199	Eukaryota	Alveolata	Dinophyta	Dinophyceae	Suessiales	Suessiales_X	Multi-affiliation	Multi-affiliation	0	2	0	0	0	0	0	0	0	0	0	0	0	0	0	0	0	0	0	0	0	0	0	0	0	0	0	0	0	0	0	0	0	0
OTU_2200	Eukaryota	Alveolata	Dinophyta	Dinophyceae	Suessiales	Suessiales_X	Multi-affiliation	Multi-affiliation	0	0	0	0	0	0	0	0	0	0	0	0	0	0	0	0	0	0	2	0	0	0	0	0	0	0	0	0	0	0	0	0	0	0
OTU_2201	Eukaryota	Alveolata	Dinophyta	Dinophyceae	Suessiales	Suessiales_X	Polarella	Polarella_glacialis	0	0	0	0	0	0	0	0	0	0	0	0	0	0	0	0	2	0	0	0	0	0	0	0	0	0	0	0	0	0	0	0	0	0
OTU_2203	Eukaryota	Alveolata	Dinophyta	Dinophyceae	Suessiales	Suessiales_X	Multi-affiliation	Multi-affiliation	0	0	0	0	0	0	0	0	0	0	0	0	0	0	0	0	0	0	0	0	0	0	0	0	0	0	0	0	0	2	0	0	0	0
OTU_2205	Eukaryota	Alveolata	Dinophyta	Dinophyceae	Suessiales	Suessiales_X	Polarella	Polarella_glacialis	0	0	0	0	0	0	0	0	0	0	0	0	0	0	0	0	0	0	0	0	0	0	0	0	0	0	0	0	0	2	0	0	0	0
OTU_2206	Eukaryota	Alveolata	Dinophyta	Dinophyceae	Suessiales	Suessiales_X	Multi-affiliation	Multi-affiliation	0	2	0	0	0	0	0	0	0	0	0	0	0	0	0	0	0	0	0	0	0	0	0	0	0	0	0	0	0	0	0	0	0	0
OTU_2207	Eukaryota	Alveolata	Dinophyta	Dinophyceae	Suessiales	Suessiales_X	Multi-affiliation	Multi-affiliation	2	0	0	0	0	0	0	0	0	0	0	0	0	0	0	0	0	0	0	0	0	0	0	0	0	0	0	0	0	0	0	0	0	0
OTU_2209	Eukaryota	Alveolata	Dinophyta	Dinophyceae	Suessiales	Suessiales_X	Multi-affiliation	Multi-affiliation	0	0	2	0	0	0	0	0	0	0	0	0	0	0	0	0	0	0	0	0	0	0	0	0	0	0	0	0	0	0	0	0	2	0
OTU_2210	Eukaryota	Opisthokonta	Fungi	Ascomycota	Pezizomycotina	Sordariomycetes	Sordariomycetes_X	Sordariomycetes_X_sp.	0	0	0	0	0	0	0	0	0	0	0	0	0	0	0	0	0	0	0	0	0	0	2	0	0	0	0	0	0	0	0	0	0	0
OTU_2211	Eukaryota	Archaeplastida	Chlorophyta	Mamiellophyceae	Dolichomastigales	Crustomastigaceae	Crustomastix	Crustomastix_didyma	0	0	0	0	0	0	0	0	0	0	0	0	2	0	0	0	0	0	0	0	0	0	0	0	0	0	0	0	0	0	0	0	0	0
OTU_2221	Eukaryota	Alveolata	Dinophyta	Dinophyceae	Suessiales	Suessiales_X	Multi-affiliation	Multi-affiliation	0	0	0	0	0	0	0	0	2	0	0	0	0	0	0	0	0	0	0	0	0	0	0	0	0	0	0	0	0	0	0	0	0	0
OTU_2222	Eukaryota	Alveolata	Dinophyta	Dinophyceae	Suessiales	Suessiales_X	Multi-affiliation	Multi-affiliation	0	0	0	0	0	0	0	0	0	0	0	0	0	0	0	0	0	0	0	0	0	0	0	0	0	0	2	0	0	0	0	0	0	0
OTU_2223	Eukaryota	Alveolata	Dinophyta	Dinophyceae	Suessiales	Suessiales_X	Suessiales_XX	Suessiales_XX_sp.	0	0	0	0	0	0	0	1	0	0	0	0	0	0	0	0	0	0	0	0	0	0	0	0	0	0	0	0	0	0	0	0	2	0
OTU_2226	Eukaryota	Alveolata	Dinophyta	Dinophyceae	Suessiales	Suessiales_X	Multi-affiliation	Multi-affiliation	0	0	0	0	0	0	0	0	0	0	0	0	0	0	0	0	0	0	0	0	0	0	0	0	0	0	2	0	0	0	0	0	0	0
OTU_2228	Eukaryota	Alveolata	Dinophyta	Dinophyceae	Suessiales	Suessiales_X	Multi-affiliation	Multi-affiliation	0	0	0	0	0	0	0	0	0	0	0	0	0	0	0	0	0	0	0	0	0	0	0	0	2	0	0	0	0	0	0	0	0	0
OTU_2229	Eukaryota	Alveolata	Dinophyta	Dinophyceae	Suessiales	Suessiales_X	Polarella	Polarella_glacialis	0	0	0	0	0	0	0	0	2	0	0	0	0	0	0	0	0	0	0	0	0	0	0	0	0	0	0	0	0	0	0	0	0	0
OTU_2230	Eukaryota	Alveolata	Dinophyta	Dinophyceae	Suessiales	Suessiales_X	Pelagodinium	Pelagodinium_beii	0	0	0	0	0	0	0	0	0	0	0	0	0	0	0	0	0	0	0	0	0	0	0	0	0	0	0	0	0	0	2	0	0	0
OTU_2231	Eukaryota	Alveolata	Dinophyta	Dinophyceae	Suessiales	Suessiales_X	Multi-affiliation	Multi-affiliation	0	0	1	0	0	0	0	0	0	0	0	0	0	0	0	0	0	0	0	0	0	0	0	0	0	0	2	0	0	0	0	0	0	0
OTU_2232	Eukaryota	Alveolata	Dinophyta	Dinophyceae	Suessiales	Suessiales_X	Multi-affiliation	Multi-affiliation	0	0	0	0	0	2	0	0	0	0	0	0	0	0	0	0	0	0	0	0	0	0	0	0	0	0	0	0	0	0	0	0	0	0
OTU_2233	Eukaryota	Alveolata	Dinophyta	Dinophyceae	Suessiales	Suessiales_X	Multi-affiliation	Multi-affiliation	0	0	0	0	0	0	0	0	0	0	0	0	0	0	0	0	0	0	0	0	2	0	0	0	0	0	0	0	0	0	0	0	0	0
OTU_2235	Eukaryota	Alveolata	Dinophyta	Dinophyceae	Suessiales	Suessiales_X	Pelagodinium	Pelagodinium_beii	0	0	0	0	0	0	0	0	0	0	0	0	0	0	0	0	0	0	0	0	2	0	0	0	0	0	0	0	0	0	0	0	0	0
OTU_2236	Eukaryota	Alveolata	Dinophyta	Dinophyceae	Suessiales	Suessiales_X	Polarella	Polarella_glacialis	0	0	0	0	0	0	0	0	0	0	0	0	0	0	0	0	0	0	0	0	0	0	0	0	0	0	0	0	0	0	0	2	0	0
OTU_2237	Eukaryota	Alveolata	Dinophyta	Dinophyceae	Suessiales	Suessiales_X	Multi-affiliation	Multi-affiliation	0	0	0	0	0	0	0	0	0	0	0	0	0	0	0	0	0	0	0	0	0	0	0	0	0	0	0	0	2	0	0	0	0	0
OTU_2238	Eukaryota	Alveolata	Dinophyta	Dinophyceae	Suessiales	Suessiales_X	Multi-affiliation	Multi-affiliation	0	0	0	0	0	2	0	0	0	0	0	0	0	0	0	0	0	0	0	0	0	0	0	0	0	0	0	0	0	0	0	0	0	0
OTU_2241	Eukaryota	Alveolata	Dinophyta	Dinophyceae	Suessiales	Suessiales_X	Polarella	Polarella_glacialis	0	0	0	0	0	0	0	0	0	0	0	0	2	0	0	0	0	0	0	0	0	0	0	0	0	0	0	0	0	0	0	0	0	0
OTU_2242	Eukaryota	Alveolata	Dinophyta	Dinophyceae	Suessiales	Suessiales_X	Multi-affiliation	Multi-affiliation	0	0	0	0	0	0	0	0	0	0	0	0	0	0	0	0	0	0	0	0	0	0	0	0	0	0	0	0	0	0	2	0	0	0
OTU_2243	Eukaryota	Alveolata	Dinophyta	Dinophyceae	Suessiales	Suessiales_X	Multi-affiliation	Multi-affiliation	2	0	0	0	0	0	0	0	0	0	0	0	0	0	0	0	0	0	0	0	0	0	0	0	0	0	0	0	0	0	0	0	0	0
OTU_2244	Eukaryota	Alveolata	Dinophyta	Dinophyceae	Suessiales	Suessiales_X	Multi-affiliation	Multi-affiliation	0	0	0	0	0	0	0	0	0	0	0	2	0	0	0	0	0	0	0	0	0	0	0	0	0	0	0	0	0	0	0	0	0	0
OTU_2245	Eukaryota	Alveolata	Dinophyta	Dinophyceae	Suessiales	Suessiales_X	Multi-affiliation	Multi-affiliation	0	0	0	0	0	0	0	0	0	0	0	0	0	0	0	0	0	0	0	0	0	0	0	0	0	0	3	0	0	0	0	0	0	0
OTU_2246	Eukaryota	Alveolata	Dinophyta	Dinophyceae	Suessiales	Suessiales_X	Multi-affiliation	Multi-affiliation	0	0	0	0	0	0	2	0	0	0	0	0	0	0	0	0	0	0	0	0	0	0	0	0	0	0	0	0	0	0	0	0	0	0
OTU_2247	Eukaryota	Alveolata	Dinophyta	Dinophyceae	Suessiales	Suessiales_X	Multi-affiliation	Multi-affiliation	2	0	0	0	0	0	0	0	0	0	0	0	0	0	0	0	0	0	0	0	0	0	0	0	0	0	0	0	0	0	0	0	0	0
OTU_2248	Eukaryota	Alveolata	Dinophyta	Dinophyceae	Suessiales	Suessiales_X	Multi-affiliation	Multi-affiliation	3	0	0	0	0	0	0	0	0	0	0	0	0	0	0	0	0	0	0	0	0	0	0	0	0	0	0	0	0	0	0	0	0	0
OTU_2250	Eukaryota	Alveolata	Dinophyta	Dinophyceae	Suessiales	Suessiales_X	Multi-affiliation	Multi-affiliation	0	0	0	0	0	0	0	0	0	0	0	0	0	0	0	0	0	0	0	0	0	0	0	0	0	0	2	0	0	0	0	0	0	0
OTU_2251	Eukaryota	Alveolata	Dinophyta	Dinophyceae	Suessiales	Suessiales_X	Multi-affiliation	Multi-affiliation	0	0	0	0	0	0	0	0	0	0	0	0	0	0	0	0	0	0	0	0	0	0	0	0	0	0	0	0	0	0	0	0	2	0
OTU_2252	Eukaryota	Alveolata	Dinophyta	Dinophyceae	Suessiales	Suessiales_X	Polarella	Polarella_glacialis	0	0	0	0	0	0	0	2	0	0	0	0	0	0	0	0	0	0	0	0	0	0	0	0	0	0	0	0	0	0	0	0	0	0
OTU_2255	Eukaryota	Alveolata	Dinophyta	Dinophyceae	Suessiales	Suessiales_X	Multi-affiliation	Multi-affiliation	0	0	0	0	0	0	0	0	0	0	0	0	0	0	0	0	0	0	0	0	0	2	0	0	0	0	0	0	0	0	0	0	0	0
OTU_2257	Eukaryota	Alveolata	Dinophyta	Dinophyceae	Suessiales	Suessiales_X	Multi-affiliation	Multi-affiliation	0	0	0	0	0	0	0	0	0	0	0	0	0	0	0	0	0	0	0	0	0	0	0	0	0	0	0	0	0	0	2	0	0	0
OTU_2259	Eukaryota	Alveolata	Dinophyta	Dinophyceae	Dinophyceae_X	Dinophyceae_XX	Heterocapsa	Multi-affiliation	0	0	0	0	0	0	0	0	0	0	0	1	0	0	0	0	0	0	0	0	0	0	0	0	0	0	0	0	0	0	0	0	0	0
OTU_2263	Eukaryota	Alveolata	Dinophyta	Dinophyceae	Suessiales	Suessiales_X	Multi-affiliation	Multi-affiliation	0	0	0	0	0	0	0	0	0	2	0	0	0	0	0	0	0	0	0	0	0	0	0	0	0	0	0	0	0	0	0	0	0	0
OTU_2269	Eukaryota	Alveolata	Dinophyta	Dinophyceae	Suessiales	Suessiales_X	Multi-affiliation	Multi-affiliation	0	0	0	0	0	0	0	2	0	0	0	0	0	0	0	0	0	0	0	0	0	0	0	0	0	0	0	0	0	0	0	0	0	0
OTU_2270	Eukaryota	Alveolata	Dinophyta	Dinophyceae	Suessiales	Suessiales_X	Pelagodinium	Pelagodinium_beii	0	0	0	0	0	0	0	0	0	0	0	0	0	0	0	0	0	0	0	0	0	0	0	0	0	0	0	0	2	0	0	0	0	0
OTU_2271	Eukaryota	Alveolata	Dinophyta	Dinophyceae	Suessiales	Suessiales_X	Polarella	Polarella_glacialis	0	0	0	0	0	0	0	0	0	0	0	0	0	0	0	0	0	0	0	0	0	0	0	0	2	0	0	0	0	0	0	0	0	0
OTU_2272	Eukaryota	Alveolata	Dinophyta	Syndiniales	Dino-Group-II	Dino-Group-II-Clade-6	Dino-Group-II-Clade-6_X	Dino-Group-II-Clade-6_X_sp.	0	0	0	0	0	0	0	0	0	0	0	0	0	0	2	0	0	0	0	0	0	0	0	0	0	0	0	0	0	0	0	0	0	0
OTU_2274	Eukaryota	Alveolata	Dinophyta	Dinophyceae	Suessiales	Suessiales_X	Multi-affiliation	Multi-affiliation	0	0	0	0	0	0	0	0	0	0	0	0	0	0	0	0	0	0	0	0	0	0	0	0	0	0	0	0	0	0	0	0	2	0
OTU_2275	Eukaryota	Alveolata	Dinophyta	Dinophyceae	Suessiales	Suessiales_X	Multi-affiliation	Multi-affiliation	0	0	0	0	0	0	0	0	0	2	0	0	0	0	0	0	0	0	0	0	0	0	0	0	0	0	0	0	0	0	0	0	0	0
OTU_2276	Eukaryota	Alveolata	Dinophyta	Dinophyceae	Suessiales	Suessiales_X	Multi-affiliation	Multi-affiliation	0	0	0	0	0	0	0	0	0	0	0	0	0	0	0	0	0	0	0	0	0	2	0	0	0	0	0	0	0	0	0	0	0	0
OTU_2278	Eukaryota	Alveolata	Dinophyta	Dinophyceae	Suessiales	Suessiales_X	Pelagodinium	Pelagodinium_beii	0	0	0	0	0	2	0	0	0	0	0	0	0	0	0	0	0	0	0	0	0	0	0	0	0	0	0	0	0	0	0	0	0	0
OTU_2279	Eukaryota	Alveolata	Dinophyta	Dinophyceae	Suessiales	Suessiales_X	Multi-affiliation	Multi-affiliation	4	0	0	0	0	0	0	0	0	0	0	0	0	0	0	0	0	0	0	0	0	0	0	0	0	0	0	0	0	0	0	0	0	0
OTU_2280	Eukaryota	Alveolata	Dinophyta	Dinophyceae	Suessiales	Suessiales_X	Multi-affiliation	Multi-affiliation	0	0	0	0	0	0	0	0	0	0	0	0	0	0	0	0	0	0	0	0	0	0	0	0	0	0	0	0	0	0	2	0	0	0
OTU_2282	Eukaryota	Alveolata	Dinophyta	Dinophyceae	Suessiales	Suessiales_X	Multi-affiliation	Multi-affiliation	0	0	0	0	0	0	0	0	0	0	0	0	0	0	0	0	0	2	0	0	0	0	0	0	0	0	0	0	0	0	0	0	0	0
OTU_2283	Eukaryota	Alveolata	Dinophyta	Dinophyceae	Suessiales	Suessiales_X	Multi-affiliation	Multi-affiliation	0	0	0	0	0	0	0	0	0	0	0	0	0	0	0	0	0	0	0	0	0	2	0	0	0	0	0	0	0	0	0	0	0	0
OTU_2284	Eukaryota	Alveolata	Dinophyta	Dinophyceae	Suessiales	Suessiales_X	Multi-affiliation	Multi-affiliation	0	0	0	0	0	0	0	0	0	0	0	0	0	0	0	0	0	0	0	0	0	0	0	0	0	0	0	0	0	2	0	0	0	0
OTU_2288	Eukaryota	Alveolata	Dinophyta	Dinophyceae	Dinophyceae_X	Dinophyceae_XX	Protoperidinium	Protoperidinium_thulesense	0	0	0	0	0	0	0	0	0	0	0	0	0	0	0	0	0	0	0	0	0	0	0	0	2	0	0	0	0	0	0	0	0	0
OTU_2289	Eukaryota	Alveolata	Dinophyta	Dinophyceae	Dinophyceae_X	Dinophyceae_XX	Dinophyceae_XXX	Dinophyceae_XXX_sp.	0	0	0	0	0	0	0	0	0	0	0	0	0	0	0	0	0	0	0	0	0	0	0	2	0	0	0	0	0	0	0	0	0	0
OTU_2291	Eukaryota	Alveolata	Dinophyta	Dinophyceae	Dinophyceae_X	Dinophyceae_XX	Dinophyceae_XXX	Dinophyceae_XXX_sp.	0	0	0	0	0	0	0	0	0	0	0	0	0	0	0	0	0	0	0	0	0	0	0	2	0	0	0	0	0	0	0	0	0	0
OTU_2293	Eukaryota	Multi-affiliation	Multi-affiliation	Multi-affiliation	Multi-affiliation	Multi-affiliation	Multi-affiliation	Multi-affiliation	0	0	0	0	0	0	0	0	0	0	0	0	0	0	0	0	0	0	0	0	0	0	0	2	0	0	0	0	0	0	0	0	0	0
OTU_2294	Eukaryota	Alveolata	Dinophyta	Dinophyceae	Dinophyceae_X	Dinophyceae_XX	Dinophyceae_XXX	Dinophyceae_XXX_sp.	0	0	0	0	0	0	0	0	0	0	0	0	0	0	0	0	0	0	0	0	0	0	0	0	0	0	0	0	0	2	0	0	0	0
OTU_2296	Eukaryota	Alveolata	Dinophyta	Dinophyceae	Dinophyceae_X	Dinophyceae_XX	Dinophyceae_XXX	Dinophyceae_XXX_sp.	0	0	0	0	0	0	0	0	0	0	0	0	0	0	0	0	0	0	0	0	0	0	0	0	0	0	0	0	0	4	0	0	0	0
OTU_2297	Eukaryota	Alveolata	Dinophyta	Dinophyceae	Dinophyceae_X	Dinophyceae_XX	Dinophyceae_XXX	Dinophyceae_XXX_sp.	0	0	2	0	0	0	0	0	0	0	0	0	0	0	0	0	0	0	0	0	0	0	0	0	0	0	0	0	0	0	0	0	0	0
OTU_2298	Eukaryota	Alveolata	Dinophyta	Dinophyceae	Dinophyceae_X	Dinophyceae_XX	Dinophyceae_XXX	Dinophyceae_XXX_sp.	0	0	0	0	0	0	0	0	0	0	0	0	0	0	0	0	0	0	0	0	0	0	0	0	0	0	0	0	0	2	0	0	0	0
OTU_2300	Eukaryota	Alveolata	Dinophyta	Dinophyceae	Dinophyceae_X	Dinophyceae_XX	Dinophyceae_XXX	Dinophyceae_XXX_sp.	0	0	2	0	0	0	0	0	0	0	0	0	0	0	0	0	0	0	0	0	0	0	0	0	0	0	0	0	0	0	0	0	0	0
OTU_2303	Eukaryota	Alveolata	Dinophyta	Dinophyceae	Dinophyceae_X	Dinophyceae_XX	Dinophyceae_XXX	Dinophyceae_XXX_sp.	0	0	0	0	0	0	0	0	0	0	0	0	0	0	0	0	0	0	0	0	0	0	0	0	0	0	0	0	0	0	0	2	0	0
OTU_2304	Eukaryota	Alveolata	Dinophyta	Dinophyceae	Dinophyceae_X	Dinophyceae_XX	Dinophyceae_XXX	Dinophyceae_XXX_sp.	0	0	0	0	0	0	0	0	0	0	0	0	0	0	0	0	0	0	0	0	2	0	0	0	0	0	0	0	0	0	0	0	0	0
OTU_2305	Eukaryota	Alveolata	Dinophyta	Dinophyceae	Dinophyceae_X	Dinophyceae_XX	Dinophyceae_XXX	Dinophyceae_XXX_sp.	0	0	2	0	0	0	0	0	0	0	0	0	0	0	0	0	0	0	0	0	0	0	0	0	0	0	0	0	0	0	0	0	0	0
OTU_2306	Eukaryota	Alveolata	Dinophyta	Dinophyceae	Dinophyceae_X	Dinophyceae_XX	Dinophyceae_XXX	Dinophyceae_XXX_sp.	0	0	0	0	0	0	0	0	0	0	0	0	0	0	0	0	0	0	0	0	0	0	0	0	0	0	0	0	2	0	0	0	0	0
OTU_2307	Eukaryota	Alveolata	Dinophyta	Dinophyceae	Dinophyceae_X	Dinophyceae_XX	Dinophyceae_XXX	Dinophyceae_XXX_sp.	0	0	0	0	0	0	0	0	0	0	0	0	0	0	0	0	0	0	0	0	0	0	0	0	0	0	0	0	0	2	0	0	0	0
OTU_2308	Eukaryota	Alveolata	Dinophyta	Dinophyceae	Dinophyceae_X	Dinophyceae_XX	Dinophyceae_XXX	Dinophyceae_XXX_sp.	0	0	0	0	0	0	0	0	0	0	0	0	2	0	0	0	0	0	0	0	0	0	0	0	0	0	0	0	0	0	0	0	0	0
OTU_2309	Eukaryota	Alveolata	Dinophyta	Dinophyceae	Dinophyceae_X	Dinophyceae_XX	Dinophyceae_XXX	Dinophyceae_XXX_sp.	0	0	0	0	0	0	0	0	0	0	0	0	0	0	0	0	0	0	0	0	0	0	0	0	0	0	0	0	0	0	0	0	3	0
OTU_2312	Eukaryota	Alveolata	Dinophyta	Dinophyceae	Dinophyceae_X	Dinophyceae_XX	Dinophyceae_XXX	Dinophyceae_XXX_sp.	0	0	3	0	0	0	0	0	0	0	0	0	0	0	0	0	0	0	0	0	0	0	0	0	0	0	0	0	0	0	0	0	0	0
OTU_2314	Eukaryota	Alveolata	Dinophyta	Dinophyceae	Dinophyceae_X	Dinophyceae_XX	Dinophyceae_XXX	Dinophyceae_XXX_sp.	0	0	0	0	0	0	0	0	0	0	0	2	0	0	0	0	0	0	0	0	0	0	0	0	0	0	0	0	0	0	0	0	0	0
OTU_2315	Eukaryota	Alveolata	Dinophyta	Dinophyceae	Dinophyceae_X	Dinophyceae_XX	Gymnodinium	Gymnodinium_sp.	0	0	0	0	0	0	0	0	0	0	0	0	0	0	0	0	0	0	0	0	0	0	0	0	0	0	0	0	0	0	0	0	2	0
OTU_2316	Eukaryota	Alveolata	Dinophyta	Dinophyceae	Dinophyceae_X	Dinophyceae_XX	Dinophyceae_XXX	Dinophyceae_XXX_sp.	0	0	2	0	0	0	0	0	0	0	0	0	0	0	0	0	0	0	0	0	0	0	0	0	0	0	0	0	0	0	0	0	0	0
OTU_2318	Eukaryota	Alveolata	Dinophyta	Dinophyceae	Dinophyceae_X	Dinophyceae_XX	Dinophyceae_XXX	Dinophyceae_XXX_sp.	0	0	0	0	0	0	0	0	0	0	0	0	3	0	0	0	0	0	0	0	0	0	0	0	0	0	0	0	0	0	0	0	0	0
OTU_2321	Eukaryota	Alveolata	Dinophyta	Dinophyceae	Dinophyceae_X	Dinophyceae_XX	Dinophyceae_XXX	Dinophyceae_XXX_sp.	0	0	0	0	0	0	0	0	0	0	0	0	0	0	0	0	0	0	0	0	0	0	0	0	0	0	0	0	0	3	0	0	0	0
OTU_2322	Eukaryota	Alveolata	Dinophyta	Dinophyceae	Dinophyceae_X	Dinophyceae_XX	Dinophyceae_XXX	Dinophyceae_XXX_sp.	0	0	0	0	0	0	0	0	0	0	0	0	0	0	0	0	0	0	0	0	0	0	0	0	0	0	0	0	1	0	0	0	0	0
OTU_2323	Eukaryota	Alveolata	Dinophyta	Dinophyceae	Suessiales	Suessiales_X	Woloszynskia	Woloszynskia_cincta	0	0	0	0	0	0	0	0	0	0	0	0	0	0	0	0	0	0	0	0	0	0	0	0	0	0	0	0	0	0	2	0	0	0
OTU_2324	Eukaryota	Stramenopiles	Ochrophyta	Bacillariophyta	Bacillariophyta_X	Polar-centric-Mediophyceae	Multi-affiliation	Multi-affiliation	0	0	0	0	0	0	0	0	0	0	0	0	0	0	0	0	0	0	0	0	0	0	0	2	0	0	0	0	0	0	0	0	0	0
OTU_2325	Eukaryota	Stramenopiles	Ochrophyta	Bacillariophyta	Bacillariophyta_X	Polar-centric-Mediophyceae	Multi-affiliation	Multi-affiliation	0	0	0	0	0	0	0	0	0	0	0	0	0	0	0	2	0	0	0	0	0	0	0	0	0	0	0	0	0	0	0	0	0	0
OTU_2326	Eukaryota	Stramenopiles	Ochrophyta	Bacillariophyta	Bacillariophyta_X	Polar-centric-Mediophyceae	Multi-affiliation	Multi-affiliation	2	0	0	0	0	0	0	0	0	0	0	0	0	0	0	0	0	0	0	0	0	0	0	0	0	0	0	0	0	0	0	0	0	0
OTU_2331	Eukaryota	Stramenopiles	Ochrophyta	Bacillariophyta	Bacillariophyta_X	Polar-centric-Mediophyceae	Multi-affiliation	Multi-affiliation	0	0	0	0	0	0	0	0	0	0	0	0	0	0	0	3	0	0	0	0	0	0	0	0	0	0	0	0	0	0	0	0	0	0
OTU_2332	Eukaryota	Stramenopiles	Ochrophyta	Bacillariophyta	Bacillariophyta_X	Polar-centric-Mediophyceae	Multi-affiliation	Multi-affiliation	0	0	0	0	2	0	0	0	0	0	0	0	0	0	0	1	0	0	0	0	0	0	0	0	0	0	0	0	0	0	0	0	0	0
OTU_2334	Eukaryota	Multi-affiliation	Multi-affiliation	Multi-affiliation	Multi-affiliation	Multi-affiliation	Multi-affiliation	Multi-affiliation	0	0	0	0	0	0	0	0	0	0	0	0	0	0	0	0	0	0	0	0	0	0	0	2	0	0	0	0	0	0	0	0	0	0
OTU_2335	Eukaryota	Stramenopiles	Ochrophyta	Bacillariophyta	Bacillariophyta_X	Polar-centric-Mediophyceae	Multi-affiliation	Multi-affiliation	0	0	0	0	0	0	0	0	0	0	0	0	0	0	0	2	0	0	0	0	0	0	0	0	0	0	0	0	0	0	0	0	0	0
OTU_2337	Eukaryota	Stramenopiles	Ochrophyta	Bacillariophyta	Bacillariophyta_X	Polar-centric-Mediophyceae	Multi-affiliation	Multi-affiliation	0	0	0	0	0	0	0	0	0	0	0	0	0	0	0	0	0	0	0	0	0	0	0	3	0	0	0	0	0	0	0	0	0	0
OTU_2339	Eukaryota	Stramenopiles	Ochrophyta	Bacillariophyta	Bacillariophyta_X	Polar-centric-Mediophyceae	Multi-affiliation	Multi-affiliation	0	0	0	0	0	0	0	0	0	0	0	0	0	0	0	0	0	0	0	0	0	0	2	0	0	0	0	0	0	0	0	0	0	0
OTU_2340	Eukaryota	Stramenopiles	Ochrophyta	Bacillariophyta	Bacillariophyta_X	Polar-centric-Mediophyceae	Multi-affiliation	Multi-affiliation	0	0	0	0	0	0	0	0	0	0	0	0	0	0	0	0	0	0	0	0	0	0	0	2	0	0	0	0	0	0	0	0	0	0
OTU_2341	Eukaryota	Stramenopiles	Ochrophyta	Bacillariophyta	Bacillariophyta_X	Polar-centric-Mediophyceae	Multi-affiliation	Multi-affiliation	0	0	0	0	0	0	0	0	0	0	0	0	0	0	0	1	0	0	0	0	0	0	0	1	0	0	0	0	0	0	0	0	0	0
OTU_2342	Eukaryota	Stramenopiles	Ochrophyta	Bacillariophyta	Bacillariophyta_X	Polar-centric-Mediophyceae	Multi-affiliation	Multi-affiliation	0	0	0	0	0	0	0	0	0	0	0	0	0	0	0	0	0	0	0	0	0	0	2	0	0	0	0	0	0	0	0	0	0	0
OTU_2344	Eukaryota	Alveolata	Dinophyta	Dinophyceae	Suessiales	Suessiales_X	Suessiales_XX	Suessiales_XX_sp.	0	0	0	0	0	0	0	0	0	0	0	0	0	0	0	0	0	0	0	0	0	0	0	0	0	2	0	0	0	0	0	0	0	0
OTU_2345	Eukaryota	Alveolata	Dinophyta	Dinophyceae	Suessiales	Suessiales_X	Suessiales_XX	Suessiales_XX_sp.	0	0	3	0	0	0	0	0	0	0	0	0	0	0	0	0	0	0	0	0	0	0	0	0	0	0	0	0	0	0	0	0	0	0
OTU_2348	Eukaryota	Alveolata	Dinophyta	Dinophyceae	Dinophyceae_X	Dinophyceae_XX	Heterocapsa	Multi-affiliation	0	0	0	0	0	2	0	0	0	0	0	0	0	0	0	0	0	0	0	0	0	0	0	0	0	0	0	0	0	0	0	0	0	0
OTU_2350	Eukaryota	Alveolata	Dinophyta	Dinophyceae	Suessiales	Suessiales_X	Suessiales_XX	Suessiales_XX_sp.	0	0	0	0	0	0	0	0	0	0	0	0	0	0	0	0	0	0	0	0	0	2	0	0	0	0	0	0	0	0	0	0	0	0
OTU_2352	Eukaryota	Alveolata	Dinophyta	Dinophyceae	Dinophyceae_X	Dinophyceae_XX	Dinophyceae_XXX	Dinophyceae_XXX_sp.	0	0	0	0	0	0	0	0	0	0	0	0	0	0	0	0	0	0	0	0	0	0	0	0	0	0	0	0	0	2	0	0	0	0
OTU_2358	Eukaryota	Alveolata	Dinophyta	Dinophyceae	Dinophyceae_X	Dinophyceae_XX	Dinophyceae_XXX	Dinophyceae_XXX_sp.	0	0	0	0	0	0	0	0	0	0	0	0	0	0	0	0	0	0	0	0	0	0	0	0	0	0	0	0	0	2	0	0	0	0
OTU_2359	Eukaryota	Alveolata	Dinophyta	Dinophyceae	Suessiales	Suessiales_X	Suessiales_XX	Suessiales_XX_sp.	0	0	0	0	0	0	0	0	0	0	0	0	0	0	0	0	0	0	0	0	0	0	0	0	0	0	0	0	0	0	0	0	0	2
OTU_2361	Eukaryota	Alveolata	Dinophyta	Dinophyceae	Dinophyceae_X	Dinophyceae_XX	Dinophyceae_XXX	Dinophyceae_XXX_sp.	0	0	0	0	0	0	0	0	0	0	0	0	0	0	0	0	0	0	0	0	0	0	0	0	0	0	0	0	0	3	0	0	0	0
OTU_2363	Eukaryota	Alveolata	Dinophyta	Dinophyceae	Dinophyceae_X	Dinophyceae_XX	Dinophyceae_XXX	Dinophyceae_XXX_sp.	0	0	0	0	0	0	0	0	0	0	0	2	0	0	0	0	0	0	0	0	0	0	0	0	0	0	0	0	0	0	0	0	0	0
OTU_2365	Eukaryota	Alveolata	Dinophyta	Dinophyceae	Dinophyceae_X	Dinophyceae_XX	Dinophyceae_XXX	Dinophyceae_XXX_sp.	0	0	0	0	0	0	0	0	0	0	0	0	0	0	0	0	0	0	0	0	0	0	0	0	0	0	0	0	0	2	0	0	0	0
OTU_2367	Eukaryota	Alveolata	Dinophyta	Dinophyceae	Dinophyceae_X	Dinophyceae_XX	Dinophyceae_XXX	Dinophyceae_XXX_sp.	0	0	0	0	0	0	0	3	0	0	0	0	0	0	0	0	0	0	0	0	0	0	0	0	0	0	0	0	0	0	0	0	0	0
OTU_2368	Eukaryota	Alveolata	Dinophyta	Dinophyceae	Dinophyceae_X	Dinophyceae_XX	Dinophyceae_XXX	Dinophyceae_XXX_sp.	0	0	0	0	0	0	0	0	0	0	0	0	0	0	0	0	0	0	0	0	0	0	0	0	0	0	0	0	0	0	2	0	0	0
OTU_2370	Eukaryota	Alveolata	Dinophyta	Dinophyceae	Dinophyceae_X	Dinophyceae_XX	Dinophyceae_XXX	Dinophyceae_XXX_sp.	0	0	0	0	0	0	0	0	0	0	0	0	0	0	0	0	0	0	0	0	0	0	0	0	0	0	0	0	2	0	0	0	0	0
OTU_2372	Eukaryota	Alveolata	Dinophyta	Dinophyceae	Dinophyceae_X	Dinophyceae_XX	Dinophyceae_XXX	Dinophyceae_XXX_sp.	0	0	0	0	0	0	0	0	0	0	0	0	0	0	0	0	0	0	0	2	0	0	0	0	0	0	0	0	0	0	0	0	0	0
OTU_2379	Eukaryota	Alveolata	Dinophyta	Dinophyceae	Dinophyceae_X	Dinophyceae_XX	Heterocapsa	Heterocapsa_triquetra	0	0	0	0	0	0	2	0	0	0	0	0	0	0	0	0	0	0	0	0	0	0	0	0	0	0	0	0	0	0	0	0	0	0
OTU_2382	Eukaryota	Alveolata	Dinophyta	Dinophyceae	Suessiales	Suessiales_X	Suessiales_XX	Suessiales_XX_sp.	0	0	2	0	0	0	0	0	0	0	0	0	0	0	0	0	0	0	0	0	0	0	0	0	0	0	0	0	0	0	0	0	0	0
OTU_2383	Eukaryota	Alveolata	Dinophyta	Dinophyceae	Suessiales	Suessiales_X	Suessiales_XX	Suessiales_XX_sp.	0	0	0	0	0	0	0	0	0	0	0	0	0	0	0	0	0	0	0	0	0	0	0	0	0	0	0	0	0	0	0	2	0	0
OTU_2384	Eukaryota	Alveolata	Dinophyta	Dinophyceae	Suessiales	Suessiales_X	Suessiales_XX	Suessiales_XX_sp.	0	0	0	0	0	0	0	0	0	0	0	0	0	0	0	0	0	0	0	0	0	3	0	0	0	0	0	0	0	0	0	0	0	0
OTU_2388	Eukaryota	Alveolata	Dinophyta	Dinophyceae	Suessiales	Suessiales_X	Suessiales_XX	Suessiales_XX_sp.	0	0	0	0	0	0	0	0	0	0	0	0	0	0	0	0	0	0	0	0	0	0	0	0	0	0	0	0	0	0	0	0	0	3
OTU_2390	Eukaryota	Alveolata	Dinophyta	Dinophyceae	Dinophyceae_X	Dinophyceae_XX	Dinophyceae_XXX	Dinophyceae_XXX_sp.	0	0	0	0	0	0	0	0	0	0	0	0	0	0	0	0	0	0	0	0	0	0	0	0	0	0	0	0	2	0	0	0	0	0
OTU_2391	Eukaryota	Alveolata	Dinophyta	Dinophyceae	Dinophyceae_X	Dinophyceae_XX	Scrippsiella	Scrippsiella_trochoidea	0	0	0	0	2	0	0	0	0	0	0	0	0	0	0	0	0	0	0	0	0	0	0	0	0	0	0	0	0	0	0	0	0	0
OTU_2392	Eukaryota	Alveolata	Dinophyta	Dinophyceae	Suessiales	Suessiales_X	Multi-affiliation	Multi-affiliation	0	0	0	0	0	0	0	0	0	2	0	0	0	0	0	0	0	0	0	0	0	0	0	0	0	0	0	0	0	0	0	0	0	0
OTU_2393	Eukaryota	Alveolata	Dinophyta	Dinophyceae	Dinophyceae_X	Dinophyceae_XX	Dinophyceae_XXX	Dinophyceae_XXX_sp.	0	0	0	0	0	0	0	0	0	0	0	0	0	2	0	0	0	0	0	0	0	0	0	0	0	0	0	0	0	0	0	0	0	0
OTU_2397	Eukaryota	Alveolata	Dinophyta	Dinophyceae	Dinophyceae_X	Dinophyceae_XX	Dinophyceae_XXX	Dinophyceae_XXX_sp.	0	0	0	0	0	0	0	0	0	0	0	0	0	0	0	0	0	0	0	0	2	0	0	0	0	0	0	0	0	0	0	0	0	0
OTU_2398	Eukaryota	Alveolata	Dinophyta	Dinophyceae	Suessiales	Suessiales_X	Woloszynskia	Woloszynskia_cincta	0	0	0	0	0	0	0	0	0	0	0	0	0	0	0	0	0	0	0	0	0	0	0	0	0	0	0	0	0	0	0	0	2	0
OTU_2399	Eukaryota	Stramenopiles	Ochrophyta	Bacillariophyta	Bacillariophyta_X	Polar-centric-Mediophyceae	Multi-affiliation	Multi-affiliation	0	0	0	0	0	0	0	0	0	0	0	0	0	0	0	2	0	0	0	0	0	0	0	0	0	0	0	0	0	0	0	0	0	0
OTU_2401	Eukaryota	Alveolata	Dinophyta	Dinophyceae	Dinophyceae_X	Dinophyceae_XX	Diplopsalis	Diplopsalis_lenticula	0	0	0	0	0	0	0	0	0	0	0	0	0	0	0	0	0	0	0	0	0	0	0	2	0	0	0	0	0	0	0	0	0	0
OTU_2403	Eukaryota	Opisthokonta	Fungi	Basidiomycota	Agaricomycotina	Multi-affiliation	Multi-affiliation	Multi-affiliation	0	0	0	0	0	0	0	0	0	0	0	0	0	0	0	0	0	0	0	0	0	0	0	0	0	0	0	0	2	0	0	0	0	0
OTU_2404	Eukaryota	Alveolata	Dinophyta	Dinophyceae	Dinophyceae_X	Dinophyceae_XX	Multi-affiliation	Multi-affiliation	0	2	0	0	0	0	0	0	0	0	0	0	0	0	0	0	0	0	0	0	0	0	0	0	0	0	0	0	0	0	0	0	0	0
OTU_2411	Eukaryota	Alveolata	Dinophyta	Dinophyceae	Dinophyceae_X	Dinophyceae_XX	Multi-affiliation	Multi-affiliation	2	0	0	0	0	0	0	0	0	0	0	0	0	0	0	0	0	0	0	0	0	0	0	0	0	0	0	0	0	0	0	0	0	0
OTU_2412	Eukaryota	Alveolata	Dinophyta	Dinophyceae	Dinophyceae_X	Dinophyceae_XX	Scrippsiella	Scrippsiella_trochoidea	0	0	0	0	0	0	0	0	0	0	0	0	0	0	0	2	0	0	0	0	0	0	0	0	0	0	0	0	0	0	0	0	0	0
OTU_2414	Eukaryota	Alveolata	Dinophyta	Dinophyceae	Dinophyceae_X	Dinophyceae_XX	Multi-affiliation	Multi-affiliation	0	0	0	0	0	0	0	0	0	0	0	0	0	0	0	0	0	0	0	0	0	0	0	0	0	0	0	0	0	3	0	0	0	0
OTU_2415	Eukaryota	Alveolata	Dinophyta	Dinophyceae	Dinophyceae_X	Dinophyceae_XX	Gymnodinium	Gymnodinium_dorsalisulcum	0	0	0	0	0	0	0	0	0	0	0	0	0	0	0	0	0	0	0	0	0	0	0	0	0	0	0	0	2	0	0	0	0	0
OTU_2416	Eukaryota	Opisthokonta	Fungi	Basidiomycota	Agaricomycotina	Agaricomycetes	Oligoporus	Multi-affiliation	0	0	0	0	0	0	0	0	0	0	0	0	0	0	0	0	0	0	0	0	0	0	0	0	0	0	0	0	2	0	0	0	0	0
OTU_2419	Eukaryota	Opisthokonta	Fungi	Basidiomycota	Agaricomycotina	Agaricomycetes	Serpula_fungus	Serpula_lacrymans	0	0	0	0	0	0	0	0	0	0	0	0	0	0	0	0	0	0	0	0	0	0	0	0	0	0	0	0	2	0	0	0	0	0
OTU_2426	Eukaryota	Alveolata	Dinophyta	Dinophyceae	Dinophyceae_X	Dinophyceae_XX	Prorocentrum	Prorocentrum_micans	0	0	0	0	0	0	0	0	0	0	0	0	0	0	0	0	0	0	0	0	0	0	0	0	0	0	0	0	2	0	0	0	0	0
OTU_2429	Eukaryota	Alveolata	Dinophyta	Dinophyceae	Dinophyceae_X	Dinophyceae_XX	Multi-affiliation	Multi-affiliation	0	0	0	0	0	0	0	0	0	0	0	0	0	0	2	0	0	0	0	0	0	0	0	0	0	0	0	0	0	0	0	0	0	0
OTU_2430	Eukaryota	Alveolata	Dinophyta	Dinophyceae	Dinophyceae_X	Dinophyceae_XX	Multi-affiliation	Multi-affiliation	0	0	0	0	0	0	0	0	0	0	0	0	0	0	0	0	0	0	0	0	0	0	0	0	2	0	0	0	0	0	0	0	0	0
OTU_2433	Eukaryota	Alveolata	Dinophyta	Dinophyceae	Dinophyceae_X	Dinophyceae_XX	Multi-affiliation	Multi-affiliation	0	0	0	0	2	0	0	0	0	0	0	0	0	0	0	0	0	0	0	0	0	0	0	0	0	0	0	0	0	0	0	0	0	0
OTU_2436	Eukaryota	Alveolata	Dinophyta	Dinophyceae	Dinophyceae_X	Pfiesteriaceae	Pfiesteriaceae_X	Pfiesteriaceae_X_sp.	0	0	0	0	0	0	0	0	0	0	0	0	0	0	0	0	0	0	0	0	2	0	0	0	0	0	0	0	0	0	0	0	0	0
OTU_2437	Eukaryota	Alveolata	Dinophyta	Dinophyceae	Dinophyceae_X	Dinophyceae_XX	Gymnodinium	Gymnodinium_dorsalisulcum	0	0	0	0	0	0	0	0	0	0	0	2	0	0	0	0	0	0	0	0	0	0	0	0	0	0	0	0	0	0	0	0	0	0
OTU_2442	Eukaryota	Alveolata	Dinophyta	Dinophyceae	Multi-affiliation	Multi-affiliation	Multi-affiliation	Multi-affiliation	0	0	0	0	0	0	0	2	0	0	0	0	0	0	0	0	0	0	0	0	0	0	0	0	0	0	0	0	0	1	0	0	0	0
OTU_2444	Eukaryota	Alveolata	Dinophyta	Syndiniales	Dino-Group-I	Dino-Group-I-Clade-1	Dino-Group-I-Clade-1_X	Dino-Group-I-Clade-1_X_sp.	0	0	0	0	0	0	0	0	0	0	0	0	0	0	0	0	0	0	0	0	0	0	0	0	0	0	0	0	0	0	0	0	2	0
OTU_2452	Eukaryota	Alveolata	Dinophyta	Dinophyceae	Dinophyceae_X	Dinophyceae_XX	Scrippsiella	Scrippsiella_trochoidea	0	0	0	0	2	0	0	0	0	0	0	0	0	0	0	0	0	0	0	0	0	0	0	0	0	0	0	0	0	0	0	0	0	0
OTU_2455	Eukaryota	Alveolata	Dinophyta	Dinophyceae	Dinophyceae_X	Dinophyceae_XX	Scrippsiella	Scrippsiella_trochoidea	0	0	0	0	2	0	0	0	0	0	0	0	0	0	0	0	0	0	0	0	0	0	0	0	0	0	0	0	0	0	0	0	0	0
OTU_2456	Eukaryota	Alveolata	Dinophyta	Dinophyceae	Dinophyceae_X	Pfiesteriaceae	Pfiesteriaceae_X	Pfiesteriaceae_X_sp.	0	0	0	0	0	0	0	0	0	0	0	0	0	0	0	0	0	0	0	0	0	0	0	0	0	0	0	0	2	0	0	0	0	0
OTU_2458	Eukaryota	Alveolata	Dinophyta	Dinophyceae	Dinophyceae_X	Dinophyceae_XX	Prorocentrum	Prorocentrum_micans	0	0	0	0	0	0	0	0	0	0	0	0	0	0	2	0	0	0	0	0	0	0	0	0	0	0	0	0	0	0	0	0	0	0
OTU_2459	Eukaryota	Alveolata	Dinophyta	Dinophyceae	Dinophyceae_X	Dinophyceae_XX	Gymnodinium	Gymnodinium_dorsalisulcum	0	0	0	0	0	0	0	0	0	0	0	0	0	0	0	0	0	0	0	3	0	0	0	0	0	0	0	0	0	0	0	0	0	0
OTU_2460	Eukaryota	Alveolata	Dinophyta	Dinophyceae	Dinophyceae_X	Dinophyceae_XX	Prorocentrum	Prorocentrum_micans	0	0	0	0	0	0	0	0	0	0	0	0	0	0	0	2	0	0	0	0	0	0	0	0	0	0	0	0	0	0	0	0	0	0
OTU_2467	Eukaryota	Alveolata	Dinophyta	Dinophyceae	Dinophyceae_X	Dinophyceae_XX	Alexandrium	Multi-affiliation	0	0	0	0	0	0	0	0	0	0	0	0	0	0	2	0	0	0	0	0	0	0	0	0	0	0	0	0	0	0	0	0	0	0
OTU_2469	Eukaryota	Stramenopiles	Stramenopiles_X	Labyrinthulea	Labyrinthulea_X	Labyrinthulea_XX	Labyrinthulea_XXX	Labyrinthulea_XXX_sp.	0	0	0	0	0	0	0	0	0	0	0	0	0	0	0	0	0	0	0	0	0	0	3	0	0	0	0	0	0	0	0	0	0	0
OTU_2477	Eukaryota	Alveolata	Dinophyta	Dinophyceae	Suessiales	Suessiales_X	Woloszynskia	Woloszynskia_sp._strain1	0	0	0	0	0	0	0	0	0	0	0	0	0	0	0	0	0	0	0	0	2	0	0	0	0	0	0	0	0	0	0	0	0	0
OTU_2497	Eukaryota	Alveolata	Dinophyta	Syndiniales	Dino-Group-II	Dino-Group-II_X	Dino-Group-II_XX	Dino-Group-II_XX_sp.	0	0	0	0	0	0	0	0	0	0	0	0	0	0	0	0	0	0	0	0	0	0	0	0	2	0	0	0	0	0	0	0	0	0
OTU_2511	Eukaryota	Opisthokonta	Choanoflagellida	Choanoflagellatea	Craspedida	Monosigidae_Group_N	Salpingoeca_N	Salpingoeca_pyxidium	0	0	0	0	0	0	0	0	0	0	0	0	0	0	0	0	0	0	0	0	0	0	2	0	0	0	0	0	0	0	0	0	0	0
OTU_2561	Eukaryota	Stramenopiles	Ochrophyta	Bacillariophyta	Bacillariophyta_X	Polar-centric-Mediophyceae	Multi-affiliation	Multi-affiliation	0	0	0	0	0	0	0	0	0	0	0	0	0	0	0	2	0	0	0	0	0	0	0	0	0	0	0	0	0	0	0	0	0	0
OTU_2562	Eukaryota	Rhizaria	Cercozoa	Filosa-Thecofilosea	Ebriida	Botuliformidae	Botuliforma	Botuliforma_benthica	0	2	0	0	0	0	0	0	0	0	0	0	0	0	0	0	0	0	0	0	0	0	0	0	0	0	0	0	0	0	0	0	0	0
OTU_2565	Eukaryota	Rhizaria	Cercozoa	Filosa-Thecofilosea	Ebriida	Botuliformidae	Botuliforma	Botuliforma_benthica	0	0	0	0	0	0	0	0	0	0	0	0	0	0	0	0	0	0	0	0	0	2	0	0	0	0	0	0	0	0	0	0	0	0
OTU_2571	Eukaryota	Stramenopiles	Ochrophyta	Bacillariophyta	Bacillariophyta_X	Polar-centric-Mediophyceae	Thalassiosira	Thalassiosira_pseudonana	0	0	0	0	0	0	0	0	0	0	0	0	0	0	0	0	0	2	2	0	0	0	0	0	0	0	0	0	0	0	0	0	0	0
OTU_2578	Eukaryota	Rhizaria	Cercozoa	Filosa-Thecofilosea	Cryomonadida	Protaspa-lineage	Protaspa	Protaspa_longipes	0	0	0	0	0	0	0	0	0	0	0	0	0	0	0	2	0	0	0	0	0	0	0	0	0	0	0	0	0	0	0	0	0	0
OTU_2579	Eukaryota	Opisthokonta	Mesomycetozoa	Ichthyosporea	Ichthyosphonida	Ichthyosphonida_X	Ichthyosphonida_XX	Ichthyosphonida_XX_sp.	0	0	0	0	0	2	0	0	0	0	0	0	0	0	0	0	0	0	0	0	0	0	0	0	0	0	0	0	0	0	0	0	0	0
OTU_2580	Eukaryota	Alveolata	Dinophyta	Dinophyceae	Dinophyceae_X	Dinophyceae_XX	Heterocapsa	Heterocapsa_triquetra	0	0	0	0	0	0	0	0	0	0	0	0	0	0	0	0	0	1	1	0	0	0	0	0	0	0	0	0	0	0	0	0	0	0
OTU_2585	Eukaryota	Stramenopiles	Stramenopiles_X	Oomycota	Oomycota_X	Leptomitales	Leptomitales_X	Leptomitales_X_sp.	0	0	0	0	0	0	0	0	0	0	0	0	0	0	0	2	0	0	0	0	0	0	0	0	0	0	0	0	0	0	0	0	0	0
OTU_2587	Eukaryota	Opisthokonta	Fungi	Basidiomycota	Pucciniomycotina	Pucciniomycetes	Melampsora	Melampsora_larici-populina	0	0	0	0	0	0	0	0	0	0	0	0	0	0	0	0	0	2	0	0	0	0	0	0	0	0	0	0	0	0	0	0	0	0
OTU_2598	Eukaryota	Alveolata	Ciliophora	Spirotrichea	Euplotia	Euplotidae	Euplotes	Euplotes_charon	0	0	0	0	0	0	0	0	0	0	0	0	0	0	0	0	0	2	0	0	0	0	0	0	0	0	0	0	0	0	0	0	0	0
OTU_2605	Eukaryota	Rhizaria	Cercozoa	Filosa-Thecofilosea	Ebriida	Botuliformidae	Botuliforma	Botuliforma_benthica	0	2	0	0	0	0	0	0	0	0	0	0	0	0	0	0	0	0	0	0	0	0	0	0	0	0	0	0	0	0	0	0	0	0
OTU_2608	Eukaryota	Rhizaria	Cercozoa	Filosa-Thecofilosea	Cryomonadida	Protaspa-lineage	Protaspa	Protaspa_obliqua	0	0	1	0	0	0	0	0	0	0	0	0	0	0	2	0	0	0	0	0	0	0	0	0	0	0	0	0	0	0	0	0	0	0
OTU_2613	Eukaryota	Apusozoa	Hilomonadea	Planomonadida	Planomonadidae	Planomonadidae_Group-1	Stygamoeba	Stygamoeba_regulata	0	0	0	0	0	0	0	0	0	0	0	0	0	0	0	0	0	0	0	0	0	0	0	2	0	0	0	0	0	0	0	0	0	0
OTU_2616	Eukaryota	Rhizaria	Cercozoa	Endomyxa	Novel-clade-9	Novel-clade-9_X	Novel-clade-9_XX	Novel-clade-9_XX_sp.	0	0	0	0	0	0	0	0	0	0	0	0	0	0	0	0	0	0	0	0	0	0	0	0	0	0	0	2	0	0	0	0	0	0
OTU_2617	Eukaryota	Amoebozoa	Lobosa	Discosea-Flabellinia	Dactylopodida	Paramoebidae	Neoparamoeba	Neoparamoeba_pemaquidensis	0	0	0	0	0	0	0	0	0	0	0	0	0	0	0	0	0	0	0	0	0	2	0	0	0	0	0	0	0	0	0	0	0	0
OTU_2618	Eukaryota	Amoebozoa	Lobosa	Discosea-Flabellinia	Dactylopodida	Paramoebidae	Neoparamoeba	Neoparamoeba_pemaquidensis	0	0	0	0	0	0	0	0	0	0	0	0	0	0	0	0	0	0	0	0	0	2	0	0	0	0	0	0	0	0	0	0	0	0
OTU_2619	Eukaryota	Amoebozoa	Lobosa	Discosea-Flabellinia	Dactylopodida	Paramoebidae	Neoparamoeba	Neoparamoeba_pemaquidensis	0	0	0	0	0	0	0	0	0	0	0	0	0	0	0	0	0	0	0	0	0	3	0	0	0	0	0	0	0	0	0	0	0	0
OTU_2621	Eukaryota	Amoebozoa	Lobosa	Discosea-Flabellinia	Dactylopodida	Paramoebidae	Neoparamoeba	Neoparamoeba_pemaquidensis	0	0	0	0	0	0	0	0	0	0	0	0	0	0	0	0	0	0	0	0	0	2	0	0	0	0	0	0	0	0	0	0	0	0
OTU_2623	Eukaryota	Amoebozoa	Lobosa	Discosea-Flabellinia	Dactylopodida	Paramoebidae	Neoparamoeba	Neoparamoeba_pemaquidensis	0	0	0	0	0	0	0	0	0	0	0	0	0	0	0	0	0	0	0	0	0	2	0	0	0	0	0	0	0	0	0	0	0	0
OTU_2624	Eukaryota	Amoebozoa	Lobosa	Discosea-Flabellinia	Dactylopodida	Paramoebidae	Neoparamoeba	Neoparamoeba_pemaquidensis	0	0	0	0	0	0	0	0	0	0	0	0	0	0	0	0	0	0	0	0	0	2	0	0	0	0	0	0	0	0	0	0	0	0
OTU_2625	Eukaryota	Amoebozoa	Lobosa	Discosea-Flabellinia	Dactylopodida	Paramoebidae	Neoparamoeba	Neoparamoeba_pemaquidensis	0	0	0	0	0	0	0	0	0	0	0	0	0	0	0	0	0	0	0	0	0	2	0	0	0	0	0	0	0	0	0	0	0	0
OTU_2626	Eukaryota	Amoebozoa	Lobosa	Discosea-Flabellinia	Dactylopodida	Paramoebidae	Neoparamoeba	Neoparamoeba_pemaquidensis	0	0	0	0	0	0	0	0	0	0	0	0	0	0	0	0	0	0	0	0	2	0	0	0	0	0	0	0	0	0	0	0	0	0
OTU_2627	Eukaryota	Amoebozoa	Lobosa	Discosea-Flabellinia	Dactylopodida	Paramoebidae	Neoparamoeba	Neoparamoeba_pemaquidensis	0	0	0	0	0	0	0	0	0	0	0	0	0	0	0	0	0	0	0	0	0	4	0	0	0	0	0	0	0	0	0	0	0	0
OTU_2628	Eukaryota	Amoebozoa	Lobosa	Discosea-Flabellinia	Dactylopodida	Paramoebidae	Neoparamoeba	Neoparamoeba_pemaquidensis	0	0	0	0	0	0	0	0	0	0	0	0	0	0	0	0	0	0	0	0	0	2	0	0	0	0	0	0	0	0	0	0	0	0
OTU_2629	Eukaryota	Amoebozoa	Lobosa	Discosea-Flabellinia	Dactylopodida	Paramoebidae	Neoparamoeba	Neoparamoeba_pemaquidensis	0	0	0	0	0	0	0	0	0	0	0	0	0	0	0	0	0	0	0	0	0	2	0	0	0	0	0	0	0	0	0	0	0	0
OTU_2630	Eukaryota	Amoebozoa	Lobosa	Discosea-Flabellinia	Dactylopodida	Paramoebidae	Neoparamoeba	Neoparamoeba_pemaquidensis	0	0	0	0	0	0	0	0	0	0	0	0	0	0	0	0	0	0	0	0	0	2	0	0	0	0	0	0	0	0	0	0	0	0
OTU_2631	Eukaryota	Amoebozoa	Lobosa	Discosea-Flabellinia	Dactylopodida	Paramoebidae	Neoparamoeba	Neoparamoeba_pemaquidensis	0	0	0	0	0	0	0	0	0	0	0	0	0	0	0	0	0	0	0	0	0	2	0	0	0	0	0	0	0	0	0	0	0	0
OTU_2632	Eukaryota	Amoebozoa	Lobosa	Discosea-Flabellinia	Dactylopodida	Paramoebidae	Neoparamoeba	Neoparamoeba_pemaquidensis	0	0	0	0	0	0	0	0	0	0	0	0	0	0	0	0	0	0	0	0	0	6	0	0	0	0	0	0	0	0	0	0	0	0
OTU_2633	Eukaryota	Amoebozoa	Lobosa	Discosea-Flabellinia	Dactylopodida	Paramoebidae	Neoparamoeba	Neoparamoeba_pemaquidensis	0	0	0	0	0	0	0	0	0	0	0	0	0	0	0	0	0	0	0	0	2	0	0	0	0	0	0	0	0	0	0	0	0	0
OTU_2634	Eukaryota	Amoebozoa	Lobosa	Discosea-Flabellinia	Dactylopodida	Paramoebidae	Neoparamoeba	Neoparamoeba_pemaquidensis	0	0	0	0	0	0	0	0	0	0	0	0	0	0	0	0	0	0	0	0	0	4	0	0	0	0	0	0	0	0	0	0	0	0
OTU_2635	Eukaryota	Amoebozoa	Lobosa	Discosea-Flabellinia	Dactylopodida	Paramoebidae	Neoparamoeba	Neoparamoeba_pemaquidensis	0	0	0	0	0	0	0	0	0	0	0	0	0	0	0	0	0	0	0	0	0	2	0	0	0	0	0	0	0	0	0	0	0	0
OTU_2636	Eukaryota	Amoebozoa	Lobosa	Discosea-Flabellinia	Dactylopodida	Paramoebidae	Neoparamoeba	Neoparamoeba_pemaquidensis	0	0	0	0	0	0	0	0	0	0	0	0	0	0	0	0	0	0	0	0	2	0	0	0	0	0	0	0	0	0	0	0	0	0
OTU_2637	Eukaryota	Amoebozoa	Lobosa	Discosea-Flabellinia	Dactylopodida	Paramoebidae	Neoparamoeba	Neoparamoeba_pemaquidensis	0	0	0	0	0	0	0	0	0	0	0	0	0	0	0	0	0	0	0	0	3	0	0	0	0	0	0	0	0	0	0	0	0	0
OTU_2638	Eukaryota	Amoebozoa	Lobosa	Discosea-Flabellinia	Dactylopodida	Paramoebidae	Neoparamoeba	Neoparamoeba_pemaquidensis	0	0	0	0	0	0	0	0	0	0	0	0	0	0	0	0	0	0	0	0	0	3	0	0	0	0	0	0	0	0	0	0	0	0
OTU_2639	Eukaryota	Amoebozoa	Lobosa	Discosea-Flabellinia	Dactylopodida	Paramoebidae	Neoparamoeba	Neoparamoeba_pemaquidensis	0	0	0	0	0	0	0	0	0	0	0	0	0	0	0	0	0	0	0	0	0	3	0	0	0	0	0	0	0	0	0	0	0	0
OTU_2640	Eukaryota	Amoebozoa	Lobosa	Discosea-Flabellinia	Dactylopodida	Paramoebidae	Neoparamoeba	Neoparamoeba_pemaquidensis	0	0	0	0	0	0	0	0	0	0	0	0	0	0	0	0	0	0	0	0	0	2	0	0	0	0	0	0	0	0	0	0	0	0
OTU_2641	Eukaryota	Amoebozoa	Lobosa	Discosea-Flabellinia	Dactylopodida	Paramoebidae	Neoparamoeba	Neoparamoeba_pemaquidensis	0	0	0	0	0	0	0	0	0	0	0	0	0	0	0	0	0	0	0	0	0	2	0	0	0	0	0	0	0	0	0	0	0	0
OTU_2642	Eukaryota	Amoebozoa	Lobosa	Discosea-Flabellinia	Dactylopodida	Paramoebidae	Neoparamoeba	Neoparamoeba_pemaquidensis	0	0	0	0	0	0	0	0	0	0	0	0	0	0	0	0	0	0	0	0	0	2	0	0	0	0	0	0	0	0	0	0	0	0
OTU_2643	Eukaryota	Amoebozoa	Lobosa	Discosea-Flabellinia	Dactylopodida	Paramoebidae	Neoparamoeba	Neoparamoeba_pemaquidensis	0	0	0	0	0	0	0	0	0	0	0	0	0	0	0	0	0	0	0	0	0	2	0	0	0	0	0	0	0	0	0	0	0	0
OTU_2644	Eukaryota	Amoebozoa	Lobosa	Discosea-Flabellinia	Dactylopodida	Paramoebidae	Neoparamoeba	Neoparamoeba_pemaquidensis	0	0	0	0	0	0	0	0	0	0	0	0	0	0	0	0	0	0	0	0	0	2	0	0	0	0	0	0	0	0	0	0	0	0
OTU_2645	Eukaryota	Amoebozoa	Lobosa	Discosea-Flabellinia	Dactylopodida	Paramoebidae	Neoparamoeba	Neoparamoeba_pemaquidensis	0	0	0	0	0	0	0	0	0	0	0	0	0	0	0	0	0	0	0	0	0	4	0	0	0	0	0	0	0	0	0	0	0	0
OTU_2646	Eukaryota	Amoebozoa	Lobosa	Discosea-Flabellinia	Dactylopodida	Paramoebidae	Neoparamoeba	Neoparamoeba_pemaquidensis	0	0	0	0	0	0	0	0	0	0	0	0	0	0	0	0	0	0	0	0	0	2	0	0	0	0	0	0	0	0	0	0	0	0
OTU_2647	Eukaryota	Amoebozoa	Lobosa	Discosea-Flabellinia	Dactylopodida	Paramoebidae	Neoparamoeba	Neoparamoeba_pemaquidensis	0	0	0	0	0	0	0	0	0	0	0	0	0	0	0	0	0	0	0	0	0	2	0	0	0	0	0	0	0	0	0	0	0	0
OTU_2648	Eukaryota	Amoebozoa	Lobosa	Discosea-Flabellinia	Dactylopodida	Paramoebidae	Neoparamoeba	Neoparamoeba_pemaquidensis	0	0	0	0	0	0	0	0	0	0	0	0	0	0	0	0	0	0	0	0	2	0	0	0	0	0	0	0	0	0	0	0	0	0
OTU_2649	Eukaryota	Amoebozoa	Lobosa	Discosea-Flabellinia	Dactylopodida	Paramoebidae	Neoparamoeba	Neoparamoeba_pemaquidensis	0	0	0	0	0	0	0	0	0	0	0	0	0	0	0	0	0	0	0	0	0	2	0	0	0	0	0	0	0	0	0	0	0	0
OTU_2650	Eukaryota	Amoebozoa	Lobosa	Discosea-Flabellinia	Dactylopodida	Paramoebidae	Neoparamoeba	Neoparamoeba_pemaquidensis	0	0	0	0	0	0	0	0	0	0	0	0	0	0	0	0	0	0	0	0	0	2	0	0	0	0	0	0	0	0	0	0	0	0
OTU_2651	Eukaryota	Amoebozoa	Lobosa	Discosea-Flabellinia	Dactylopodida	Paramoebidae	Neoparamoeba	Neoparamoeba_pemaquidensis	0	0	0	0	0	0	0	0	0	0	0	0	0	0	0	0	0	0	0	0	0	2	0	0	0	0	0	0	0	0	0	0	0	0
OTU_2652	Eukaryota	Alveolata	Ciliophora	Spirotrichea	Choreotrichia	Dictyocystidae	Codonellopsis	Codonellopsis_nipponica	0	0	0	0	0	0	0	0	0	0	2	0	0	0	0	0	0	0	0	0	0	0	0	0	0	0	0	0	0	0	0	0	0	0
OTU_2654	Eukaryota	Amoebozoa	Lobosa	Discosea-Flabellinia	Dactylopodida	Paramoebidae	Neoparamoeba	Neoparamoeba_pemaquidensis	0	0	0	0	0	0	0	0	0	0	0	0	0	0	0	0	0	0	0	0	0	2	0	0	0	0	0	0	0	0	0	0	0	0
OTU_2658	Eukaryota	Alveolata	Dinophyta	Dinophyceae	Suessiales	Suessiales_X	Pelagodinium	Pelagodinium_beii	0	0	0	0	0	2	0	0	0	0	0	0	0	0	0	0	0	0	0	0	0	0	0	0	0	0	0	0	0	0	0	0	0	0
OTU_2660	Eukaryota	Amoebozoa	Lobosa	Tubulinea	Leptomyxida	Rhizamoeba-saxonica-lineage	Rhizamoeba	Rhizamoeba_saxonica	0	0	0	0	0	0	0	0	0	0	0	0	0	0	0	0	0	0	0	0	0	0	3	0	0	0	0	0	0	0	0	0	0	0
OTU_2662	Eukaryota	Stramenopiles	Stramenopiles_X	Oomycota	Oomycota_X	Oomycota_XX	Oomycota_XXX	Oomycota_XXX_sp.	0	0	0	0	0	0	0	0	0	0	0	0	0	0	0	0	0	0	0	0	3	0	0	0	0	0	0	0	0	0	0	0	0	0
OTU_2663	Eukaryota	Excavata	Discoba	Euglenozoa	Kinetoplastida	Prokinetoplastidae	PLO	PLO_of	0	0	0	0	0	0	0	0	0	0	0	0	0	0	0	0	0	0	0	0	0	2	0	0	0	0	0	0	0	0	0	0	0	0
OTU_2664	Eukaryota	Excavata	Discoba	Euglenozoa	Kinetoplastida	Prokinetoplastidae	PLO	PLO_of	0	0	0	0	0	0	0	0	0	0	0	0	0	0	0	0	0	0	0	0	0	2	0	0	0	0	0	0	0	0	0	0	0	0
OTU_2665	Eukaryota	Excavata	Discoba	Euglenozoa	Kinetoplastida	Prokinetoplastidae	PLO	PLO_of	0	0	0	0	0	0	0	0	0	0	0	0	0	0	0	0	0	0	0	0	0	2	0	0	0	0	0	0	0	0	0	0	0	0
OTU_2666	Eukaryota	Excavata	Discoba	Euglenozoa	Kinetoplastida	Prokinetoplastidae	PLO	PLO_of	0	0	0	0	0	0	0	0	0	0	0	0	0	0	0	0	0	0	0	0	0	2	0	0	0	0	0	0	0	0	0	0	0	0
OTU_2673	Eukaryota	Excavata	Discoba	Euglenozoa	Euglenida	Petalomonadales	Petalomonadales_X	Petalomonadales_X_sp.	2	0	0	0	0	0	0	0	0	0	0	0	0	0	0	0	0	0	0	0	0	0	0	0	0	0	0	0	0	0	0	0	0	0
OTU_2679	Eukaryota	Alveolata	Ciliophora	Phyllopharyngea	Suctoria	Paracinetidae	Paracineta	Paracineta_limbata	0	0	0	0	0	0	0	0	0	0	0	0	0	0	0	0	0	0	0	2	0	0	0	0	0	0	0	0	0	0	0	0	0	0
OTU_2687	Eukaryota	Alveolata	Ciliophora	Phyllopharyngea	Suctoria	Acinetidae	Acineta	Acineta_tuberosa	0	0	0	0	0	0	0	0	0	0	0	0	0	0	0	0	0	0	0	0	0	0	2	0	0	0	0	0	0	0	0	0	0	0
OTU_2692	Eukaryota	Alveolata	Ciliophora	Oligohymenophorea	Mobilida	Trichodinidae	Trichodina	Trichodina_sinonovaculae	0	0	2	0	0	0	0	0	0	0	0	0	0	0	0	0	0	0	0	0	0	0	0	0	0	0	0	0	0	0	0	0	0	0
OTU_2693	Eukaryota	Alveolata	Ciliophora	Oligohymenophorea	Mobilida	Trichodinidae	Trichodina	Trichodina_sinonovaculae	0	0	0	0	0	0	0	0	0	0	0	0	0	2	0	0	0	0	0	0	0	0	0	0	0	0	0	0	0	0	0	0	0	0
OTU_2694	Eukaryota	Alveolata	Ciliophora	Oligohymenophorea	Mobilida	Trichodinidae	Trichodina	Trichodina_sinonovaculae	0	0	2	0	0	0	0	0	0	0	0	0	0	0	0	0	0	0	0	0	0	0	0	0	0	0	0	0	0	0	0	0	0	0
OTU_2695	Eukaryota	Alveolata	Ciliophora	Oligohymenophorea	Mobilida	Trichodinidae	Trichodina	Trichodina_sinonovaculae	0	0	2	0	0	0	0	0	0	0	0	0	0	0	0	0	0	0	0	0	0	0	0	0	0	0	0	0	0	0	0	0	0	0
OTU_2696	Eukaryota	Alveolata	Ciliophora	Oligohymenophorea	Mobilida	Trichodinidae	Trichodina	Trichodina_sinonovaculae	0	0	0	0	0	0	0	0	0	0	0	0	0	0	0	0	0	0	0	0	0	0	0	0	0	0	0	0	0	0	0	0	0	2
OTU_2697	Eukaryota	Alveolata	Ciliophora	Oligohymenophorea	Mobilida	Trichodinidae	Trichodina	Trichodina_sinonovaculae	0	0	0	0	0	0	0	0	0	0	0	0	0	2	0	0	0	0	0	0	0	0	0	0	0	0	0	0	0	0	0	0	0	0
OTU_2698	Eukaryota	Alveolata	Ciliophora	Oligohymenophorea	Mobilida	Trichodinidae	Trichodina	Trichodina_sinonovaculae	2	0	0	0	0	0	0	0	0	0	0	0	0	0	0	0	0	0	0	0	0	0	0	0	0	0	0	0	0	0	0	0	0	0
OTU_2700	Eukaryota	Alveolata	Ciliophora	Oligohymenophorea	Mobilida	Trichodinidae	Trichodina	Trichodina_sinonovaculae	0	0	0	0	0	0	0	0	0	0	0	1	0	0	0	0	0	0	0	0	0	0	0	0	0	0	0	0	0	0	0	0	0	1
OTU_2701	Eukaryota	Alveolata	Ciliophora	Oligohymenophorea	Mobilida	Trichodinidae	Trichodina	Trichodina_sinonovaculae	0	0	0	0	0	0	0	0	0	0	0	0	0	0	0	0	0	0	0	0	0	0	0	0	0	0	0	0	0	0	0	0	0	2
OTU_2702	Eukaryota	Alveolata	Ciliophora	Oligohymenophorea	Mobilida	Trichodinidae	Trichodina	Trichodina_sinonovaculae	0	0	0	0	0	0	0	0	0	0	0	0	0	2	0	0	0	0	0	0	0	0	0	0	0	0	0	0	0	0	0	0	0	0
OTU_2704	Eukaryota	Alveolata	Ciliophora	Oligohymenophorea	Mobilida	Trichodinidae	Trichodina	Trichodina_sinonovaculae	0	0	1	0	0	0	0	0	0	0	0	1	0	0	0	0	0	0	0	0	0	0	0	0	0	0	0	0	0	0	0	0	0	0
OTU_2708	Eukaryota	Multi-affiliation	Multi-affiliation	Multi-affiliation	Multi-affiliation	Multi-affiliation	Multi-affiliation	Multi-affiliation	0	0	0	0	0	0	0	0	0	0	0	0	0	0	0	0	0	0	0	0	2	0	0	0	0	0	0	0	0	0	0	0	0	0
OTU_2710	Eukaryota	Alveolata	Ciliophora	Phyllopharyngea	Cyrtophoria	Dysteriidae	Dysteriidae_X	Dysteriidae_X_sp.	0	0	0	0	0	0	0	0	0	0	0	0	0	0	0	0	2	0	0	0	0	0	0	0	0	0	0	0	0	0	0	0	0	0
OTU_2713	Eukaryota	Multi-affiliation	Multi-affiliation	Multi-affiliation	Multi-affiliation	Multi-affiliation	Multi-affiliation	Multi-affiliation	0	0	0	0	0	0	0	0	0	0	0	2	0	0	0	0	0	0	0	0	0	0	0	0	0	0	0	0	0	0	0	0	0	0
OTU_2714	Eukaryota	Multi-affiliation	Multi-affiliation	Multi-affiliation	Multi-affiliation	Multi-affiliation	Multi-affiliation	Multi-affiliation	0	0	0	0	0	0	0	0	0	0	0	0	0	0	0	0	0	0	0	2	0	0	0	0	0	0	0	0	0	0	0	0	0	0
OTU_2715	Eukaryota	Multi-affiliation	Multi-affiliation	Multi-affiliation	Multi-affiliation	Multi-affiliation	Multi-affiliation	Multi-affiliation	0	0	0	0	0	0	0	0	0	0	0	0	0	0	0	0	0	0	0	0	1	0	0	0	0	0	0	0	0	0	0	0	0	0
OTU_2716	Eukaryota	Multi-affiliation	Multi-affiliation	Multi-affiliation	Multi-affiliation	Multi-affiliation	Multi-affiliation	Multi-affiliation	0	0	0	0	0	0	0	0	0	0	0	0	0	0	0	0	0	0	0	0	0	0	0	0	0	0	0	0	0	0	2	0	0	0
OTU_2717	Eukaryota	Alveolata	Ciliophora	Oligohymenophorea	Peritrichia	Zoothamniidae	Zoothamnium	Multi-affiliation	0	0	0	0	0	0	0	2	0	0	0	0	0	0	0	0	0	0	0	0	0	0	0	0	0	0	0	0	0	0	0	0	0	0
OTU_2720	Eukaryota	Alveolata	Ciliophora	Oligohymenophorea	Peritrichia	Zoothamniidae	Zoothamnopsis	Zoothamnopsis_sinica	0	0	0	0	0	0	0	0	0	0	0	0	0	0	0	0	0	0	0	0	0	0	2	0	0	0	0	0	0	0	0	0	0	0
OTU_2722	Eukaryota	Alveolata	Ciliophora	Oligohymenophorea	Peritrichia	Zoothamniidae	Zoothamnium	Zoothamnium_sp.	0	0	0	0	0	0	0	0	0	0	0	0	0	0	0	0	0	0	0	0	0	0	2	0	0	0	0	0	0	0	0	0	0	0
OTU_2730	Eukaryota	Alveolata	Apicomplexa	Apicomplexa_X	Gregarines	Gregarines_X	Gregarines_XX	Gregarines_XX_sp.	0	0	0	0	0	0	0	0	0	0	0	0	0	0	0	0	0	0	0	0	0	0	0	0	0	2	0	0	0	0	0	0	0	0
OTU_2731	Eukaryota	Multi-affiliation	Multi-affiliation	Multi-affiliation	Multi-affiliation	Multi-affiliation	Multi-affiliation	Multi-affiliation	0	0	0	0	0	0	0	0	0	0	0	0	2	0	0	0	0	0	0	0	0	0	0	0	0	0	0	0	0	0	0	0	0	0
OTU_2736	Eukaryota	Alveolata	Ciliophora	Oligohymenophorea	Peritrichia	Zoothamniidae	Zoothamnium	Zoothamnium_pelagicum	0	0	0	0	0	0	0	2	0	0	0	0	0	0	0	0	0	0	0	0	0	0	0	0	0	0	0	0	0	0	0	0	0	0
OTU_2737	Eukaryota	Alveolata	Ciliophora	Oligohymenophorea	Peritrichia	Zoothamniidae	Zoothamnium	Zoothamnium_pelagicum	0	0	0	0	0	0	0	0	0	0	0	2	0	0	0	0	0	0	0	0	0	0	0	0	0	0	0	0	0	0	0	0	0	0
OTU_2738	Eukaryota	Alveolata	Ciliophora	Oligohymenophorea	Sessilida	Vorticellidae	Vorticella	Vorticella_sp.	0	2	0	0	0	0	0	0	0	0	0	0	0	0	0	0	0	0	0	0	0	0	0	0	0	0	0	0	0	0	0	0	0	0
OTU_2739	Eukaryota	Alveolata	Ciliophora	Oligohymenophorea	Peritrichia	Zoothamniidae	Zoothamnium	Zoothamnium_pelagicum	0	0	0	0	0	0	0	2	0	0	0	0	0	0	0	0	0	0	0	0	0	0	0	0	0	0	0	0	0	0	0	0	0	0
OTU_2740	Eukaryota	Alveolata	Ciliophora	Oligohymenophorea	Peritrichia	Zoothamniidae	Zoothamnium	Zoothamnium_pelagicum	0	0	0	0	0	0	0	0	0	0	0	0	0	0	0	0	0	0	0	0	0	0	0	0	0	0	0	0	2	0	0	0	0	0
OTU_2745	Eukaryota	Alveolata	Dinophyta	Dinophyceae	Dinophyceae_X	Dinophyceae_XX	Protoperidinium	Protoperidinium_bipes	0	0	0	0	0	0	0	0	0	0	0	0	0	0	0	0	0	0	0	0	0	0	0	0	0	0	2	0	0	0	0	0	0	0
OTU_2746	Eukaryota	Hacrobia	Cryptophyta	Cryptophyceae	Cryptophyceae_X	Cryptomonadales	Multi-affiliation	Multi-affiliation	0	0	0	0	0	0	0	0	0	0	0	0	0	0	0	0	0	0	0	0	0	0	0	0	0	0	0	0	2	0	0	0	0	0
OTU_2748	Eukaryota	Stramenopiles	Ochrophyta	Bacillariophyta	Bacillariophyta_X	Polar-centric-Mediophyceae	Chaetoceros	Multi-affiliation	0	0	0	0	0	0	0	0	0	0	0	0	0	0	0	0	0	0	0	0	0	0	0	0	0	0	0	0	2	0	0	0	0	0
OTU_2751	Eukaryota	Alveolata	Ciliophora	Oligohymenophorea	Peritrichia	Zoothamniidae	Planeticovorticella	Planeticovorticella_sp.	0	0	0	0	0	0	0	0	0	0	0	5	0	0	0	0	0	0	0	0	0	0	0	0	0	0	0	0	0	0	0	0	0	0
OTU_2753	Eukaryota	Alveolata	Apicomplexa	Apicomplexa_X	Gregarines	Gregarines_X	Gregarines_XX	Gregarines_XX_sp.	0	0	0	0	0	0	0	0	0	0	0	0	0	0	2	0	0	0	0	0	0	0	0	0	0	0	0	0	0	0	0	0	0	0
OTU_2754	Eukaryota	Stramenopiles	Ochrophyta	Bacillariophyta	Bacillariophyta_X	Multi-affiliation	Multi-affiliation	Multi-affiliation	0	0	0	0	0	0	0	0	0	0	0	0	0	0	0	0	0	0	0	0	0	0	0	2	0	0	0	0	0	0	0	0	0	0
OTU_2755	Eukaryota	Stramenopiles	Ochrophyta	Bacillariophyta	Bacillariophyta_X	Multi-affiliation	Multi-affiliation	Multi-affiliation	0	0	0	0	0	0	0	0	0	0	0	0	0	0	0	0	0	0	0	0	0	0	0	2	0	0	0	0	0	0	0	0	0	0
OTU_2756	Eukaryota	Stramenopiles	Ochrophyta	Bacillariophyta	Bacillariophyta_X	Raphid-pennate	Cylindrotheca	Cylindrotheca_closterium	0	0	0	0	0	0	0	0	0	0	0	0	0	0	0	0	0	2	0	0	0	0	0	0	0	0	0	0	0	0	0	0	0	0
OTU_2762	Eukaryota	Stramenopiles	Ochrophyta	Bacillariophyta	Bacillariophyta_X	Raphid-pennate	Nitzschia	Multi-affiliation	0	0	0	0	0	0	0	0	0	0	0	0	0	0	2	0	0	0	0	0	0	0	0	0	0	0	0	0	0	0	0	0	0	0
OTU_2763	Eukaryota	Stramenopiles	Ochrophyta	Bacillariophyta	Bacillariophyta_X	Raphid-pennate	Multi-affiliation	Multi-affiliation	0	0	0	0	0	0	0	0	0	0	0	0	0	0	0	0	0	0	0	0	0	0	2	0	0	0	0	0	0	0	0	0	0	0
OTU_2774	Eukaryota	Stramenopiles	Stramenopiles_X	Oomycota	Oomycota_X	Haliphthorales	Multi-affiliation	Multi-affiliation	0	0	0	0	0	0	0	0	0	0	0	0	0	0	0	0	0	2	0	0	0	0	0	0	0	0	0	0	0	0	0	0	0	0
OTU_2779	Eukaryota	Alveolata	Ciliophora	Spirotrichea	Choreotrichia	Dictyocystidae	Codonellopsis	Codonellopsis_nipponica	0	0	0	0	0	0	0	0	0	0	2	0	0	0	0	0	0	0	0	0	0	0	0	0	0	0	0	0	0	0	0	0	0	0
OTU_2784	Eukaryota	Alveolata	Ciliophora	Spirotrichea	Choreotrichia	Dictyocystidae	Codonellopsis	Codonellopsis_nipponica	0	0	0	0	0	0	0	0	0	0	0	0	0	0	0	0	2	0	0	0	0	0	0	0	0	0	0	0	0	0	0	0	0	0
OTU_2785	Eukaryota	Alveolata	Ciliophora	Spirotrichea	Choreotrichia	Dictyocystidae	Codonellopsis	Codonellopsis_nipponica	0	0	0	0	0	0	0	0	0	0	0	0	0	0	0	0	0	0	0	0	0	0	0	0	0	3	0	0	0	0	0	0	0	0
OTU_2790	Eukaryota	Stramenopiles	Ochrophyta	Bacillariophyta	Bacillariophyta_X	Araphid-pennate	Multi-affiliation	Multi-affiliation	0	0	0	0	0	0	0	0	0	0	0	0	0	0	2	0	0	0	0	0	0	0	0	0	0	0	0	0	0	0	0	0	0	0
OTU_2792	Eukaryota	Alveolata	Ciliophora	Spirotrichea	Choreotrichia	Dictyocystidae	Codonellopsis	Codonellopsis_nipponica	0	0	0	0	0	0	0	0	0	0	0	0	0	0	0	0	2	0	0	0	0	0	0	0	0	0	0	0	0	0	0	0	0	0
OTU_2793	Eukaryota	Alveolata	Ciliophora	Spirotrichea	Choreotrichia	Dictyocystidae	Codonellopsis	Codonellopsis_nipponica	0	0	0	0	0	0	0	0	0	0	0	0	0	0	0	0	0	2	0	0	0	0	0	0	0	0	0	0	0	0	0	0	0	0
OTU_2794	Eukaryota	Alveolata	Ciliophora	Spirotrichea	Choreotrichia	Dictyocystidae	Codonellopsis	Codonellopsis_nipponica	0	0	0	0	0	0	0	0	0	0	0	0	0	0	0	0	0	2	0	0	0	0	0	0	0	0	0	0	0	0	0	0	0	0
OTU_2795	Eukaryota	Alveolata	Ciliophora	Spirotrichea	Choreotrichia	Dictyocystidae	Codonellopsis	Codonellopsis_nipponica	0	0	0	0	0	0	0	0	0	0	0	0	0	0	0	0	0	2	0	0	0	0	0	0	0	0	0	0	0	0	0	0	0	0
OTU_2797	Eukaryota	Alveolata	Ciliophora	Spirotrichea	Choreotrichia	Dictyocystidae	Codonellopsis	Codonellopsis_nipponica	0	0	0	0	0	0	0	0	0	0	0	0	0	0	0	0	3	0	0	0	0	0	0	0	0	0	0	0	0	0	0	0	0	0
OTU_2800	Eukaryota	Alveolata	Ciliophora	Spirotrichea	Choreotrichia	Dictyocystidae	Codonellopsis	Codonellopsis_nipponica	0	0	0	0	0	0	0	0	0	0	0	0	0	0	0	0	0	0	0	0	0	0	0	0	0	2	0	0	0	0	0	0	0	0
OTU_2801	Eukaryota	Alveolata	Ciliophora	Spirotrichea	Choreotrichia	Dictyocystidae	Codonellopsis	Codonellopsis_nipponica	0	0	0	0	0	0	0	0	0	0	2	0	0	0	0	0	0	0	0	0	0	0	0	0	0	0	0	0	0	0	0	0	0	0
OTU_2803	Eukaryota	Alveolata	Ciliophora	Spirotrichea	Choreotrichia	Dictyocystidae	Codonellopsis	Codonellopsis_nipponica	0	0	0	0	0	0	0	0	0	2	0	0	0	0	0	0	0	0	0	0	0	0	0	0	0	0	0	0	0	0	0	0	0	0
OTU_2804	Eukaryota	Alveolata	Ciliophora	Spirotrichea	Choreotrichia	Dictyocystidae	Codonellopsis	Codonellopsis_nipponica	0	0	0	0	0	0	0	0	0	0	0	0	0	0	0	0	0	0	2	0	0	0	0	0	0	0	0	0	0	0	0	0	0	0
OTU_2806	Eukaryota	Alveolata	Ciliophora	Spirotrichea	Choreotrichia	Dictyocystidae	Codonellopsis	Codonellopsis_nipponica	0	0	0	0	0	0	1	0	0	0	1	0	0	0	0	0	0	0	0	0	0	0	0	0	0	0	0	0	0	0	0	0	0	0
OTU_2808	Eukaryota	Alveolata	Ciliophora	Spirotrichea	Choreotrichia	Dictyocystidae	Codonellopsis	Codonellopsis_nipponica	0	0	0	0	0	0	0	0	0	0	0	0	0	0	0	0	0	1	0	0	0	0	0	0	0	0	0	0	0	0	0	0	0	0
OTU_2810	Eukaryota	Alveolata	Ciliophora	Spirotrichea	Choreotrichia	Dictyocystidae	Codonellopsis	Codonellopsis_nipponica	0	0	0	0	0	0	0	0	0	0	0	0	0	0	0	0	0	0	2	0	0	0	0	0	0	0	0	0	0	0	0	0	0	0
OTU_2812	Eukaryota	Alveolata	Ciliophora	Spirotrichea	Choreotrichia	Dictyocystidae	Codonellopsis	Codonellopsis_nipponica	0	0	0	0	0	0	0	0	0	0	0	0	0	0	0	0	0	0	0	0	0	0	0	0	2	0	0	0	0	0	0	0	0	0
OTU_2813	Eukaryota	Alveolata	Ciliophora	Spirotrichea	Choreotrichia	Dictyocystidae	Codonellopsis	Codonellopsis_nipponica	0	0	0	0	0	0	0	0	0	0	0	0	0	0	0	0	2	0	0	0	0	0	0	0	0	0	0	0	0	0	0	0	0	0
OTU_2814	Eukaryota	Alveolata	Ciliophora	Spirotrichea	Choreotrichia	Dictyocystidae	Codonellopsis	Codonellopsis_nipponica	0	0	0	0	0	0	0	0	0	0	0	0	0	0	0	0	3	0	0	0	0	0	0	0	0	0	0	0	0	0	0	0	0	0
OTU_2815	Eukaryota	Alveolata	Ciliophora	Spirotrichea	Choreotrichia	Dictyocystidae	Codonellopsis	Codonellopsis_nipponica	0	0	0	0	0	0	0	0	0	0	0	0	0	0	0	0	0	0	2	0	0	0	0	0	0	0	0	0	0	0	0	0	0	0
OTU_2816	Eukaryota	Alveolata	Ciliophora	Spirotrichea	Choreotrichia	Dictyocystidae	Codonellopsis	Codonellopsis_nipponica	0	0	0	0	0	0	0	0	0	0	0	0	0	0	0	0	0	2	0	0	0	0	0	0	0	0	0	0	0	0	0	0	0	0
OTU_2817	Eukaryota	Alveolata	Ciliophora	Spirotrichea	Choreotrichia	Dictyocystidae	Codonellopsis	Codonellopsis_nipponica	0	0	0	0	0	0	0	0	0	0	0	0	0	0	0	0	0	0	0	0	0	0	0	0	0	2	0	0	0	0	0	0	0	0
OTU_2818	Eukaryota	Alveolata	Ciliophora	Spirotrichea	Choreotrichia	Dictyocystidae	Codonellopsis	Codonellopsis_nipponica	0	0	0	0	0	0	0	0	0	0	0	0	0	0	0	0	2	0	0	0	0	0	0	0	0	0	0	0	0	0	0	0	0	0
OTU_2819	Eukaryota	Alveolata	Ciliophora	Spirotrichea	Choreotrichia	Dictyocystidae	Codonellopsis	Codonellopsis_nipponica	0	0	0	0	0	0	0	0	0	0	0	0	0	0	0	0	1	0	1	0	0	0	0	0	0	0	0	0	0	0	0	0	0	0
OTU_2821	Eukaryota	Alveolata	Ciliophora	Spirotrichea	Choreotrichia	Dictyocystidae	Codonellopsis	Codonellopsis_nipponica	0	0	0	0	0	0	0	0	0	0	0	0	0	0	0	0	1	0	0	0	0	0	0	0	0	0	0	0	0	0	0	0	0	0
OTU_2822	Eukaryota	Alveolata	Ciliophora	Spirotrichea	Choreotrichia	Dictyocystidae	Codonellopsis	Codonellopsis_nipponica	0	0	0	0	0	1	0	0	0	0	0	0	0	0	0	0	0	0	1	0	0	0	0	0	0	0	0	0	0	0	0	0	0	0
OTU_2823	Eukaryota	Alveolata	Ciliophora	Spirotrichea	Choreotrichia	Dictyocystidae	Codonellopsis	Codonellopsis_nipponica	0	0	0	0	0	0	2	0	0	0	0	0	0	0	0	0	0	0	0	0	0	0	0	0	0	0	0	0	0	0	0	0	0	0
OTU_2824	Eukaryota	Alveolata	Ciliophora	Spirotrichea	Choreotrichia	Dictyocystidae	Codonellopsis	Codonellopsis_nipponica	0	0	0	0	0	0	0	0	0	2	0	0	0	0	0	0	0	0	0	0	0	0	0	0	0	0	0	0	0	0	0	0	0	0
OTU_2828	Eukaryota	Alveolata	Ciliophora	Spirotrichea	Choreotrichia	Dictyocystidae	Codonellopsis	Codonellopsis_nipponica	0	0	0	0	0	1	0	0	0	0	1	0	0	0	0	0	0	0	0	0	0	0	0	0	0	0	0	0	0	0	0	0	0	0
OTU_2829	Eukaryota	Alveolata	Ciliophora	Spirotrichea	Choreotrichia	Dictyocystidae	Codonellopsis	Codonellopsis_nipponica	0	0	0	0	0	0	1	0	0	0	0	0	0	0	0	0	0	0	0	0	0	0	0	0	0	0	0	0	0	0	0	0	0	0
OTU_2830	Eukaryota	Alveolata	Ciliophora	Spirotrichea	Choreotrichia	Dictyocystidae	Codonellopsis	Codonellopsis_nipponica	0	0	0	0	0	0	0	0	0	0	0	0	0	0	0	0	1	0	0	0	0	0	0	0	0	1	0	0	0	0	0	0	0	0
OTU_2832	Eukaryota	Hacrobia	Haptophyta	Prymnesiophyceae	Prymnesiales	Chrysochromulinaceae	Chrysochromulina	Chrysochromulina_sp	0	0	0	0	0	0	0	0	0	0	0	0	0	0	0	0	0	0	2	0	0	0	0	0	0	0	0	0	0	0	0	0	0	0
OTU_2833	Eukaryota	Alveolata	Ciliophora	Spirotrichea	Choreotrichia	Dictyocystidae	Codonellopsis	Codonellopsis_nipponica	0	0	0	0	0	0	2	0	0	0	0	0	0	0	0	0	0	0	0	0	0	0	0	0	0	0	0	0	0	0	0	0	0	0
OTU_2834	Eukaryota	Alveolata	Ciliophora	Spirotrichea	Choreotrichia	Dictyocystidae	Codonellopsis	Codonellopsis_nipponica	0	0	0	0	0	0	0	0	0	0	0	0	0	0	0	0	0	0	1	0	0	0	0	0	0	0	0	0	0	0	0	0	0	0
OTU_2835	Eukaryota	Alveolata	Dinophyta	Syndiniales	Dino-Group-II	Dino-Group-II-Clade-32	Dino-Group-II-Clade-32_X	Multi-affiliation	0	0	0	0	0	0	0	2	0	0	0	0	0	0	0	0	0	0	0	0	0	0	0	0	0	0	0	0	0	0	0	0	0	0
OTU_2837	Eukaryota	Alveolata	Ciliophora	Spirotrichea	Choreotrichia	Dictyocystidae	Codonellopsis	Codonellopsis_nipponica	0	0	0	0	0	0	0	0	0	0	0	0	0	0	0	0	2	0	0	0	0	0	0	0	0	0	0	0	0	0	0	0	0	0
OTU_2838	Eukaryota	Alveolata	Ciliophora	Spirotrichea	Choreotrichia	Dictyocystidae	Codonellopsis	Codonellopsis_nipponica	0	0	0	0	0	0	0	0	0	0	0	0	0	0	0	0	2	0	0	0	0	0	0	0	0	0	0	0	0	0	0	0	0	0
OTU_2839	Eukaryota	Alveolata	Ciliophora	Spirotrichea	Choreotrichia	Dictyocystidae	Codonellopsis	Codonellopsis_nipponica	0	0	0	0	0	0	2	0	0	0	0	0	0	0	0	0	0	0	0	0	0	0	0	0	0	0	0	0	0	0	0	0	0	0
OTU_2841	Eukaryota	Alveolata	Ciliophora	Spirotrichea	Choreotrichia	Tintinnidae	Tintinnopsis	Tintinnopsis_sp.	0	0	0	0	0	2	0	0	0	0	0	0	0	0	0	0	0	0	0	0	0	0	0	0	0	0	0	0	0	0	0	0	0	0
OTU_2844	Eukaryota	Hacrobia	Telonemia	Telonemia_X	Telonemia_XX	Telonemia-Group-2	Telonema-Group-2	Telonema_antarcticum	0	0	0	0	0	0	0	0	0	0	0	0	0	0	0	0	0	0	0	0	0	0	0	0	0	0	0	0	0	0	0	0	0	2
OTU_2847	Eukaryota	Hacrobia	Telonemia	Telonemia_X	Telonemia_XX	Telonemia-Group-2	Telonema-Group-2	Telonema_antarcticum	0	0	0	0	0	0	0	0	0	0	0	0	0	0	0	0	0	0	0	0	0	0	0	0	0	0	0	0	0	0	0	0	0	2
OTU_2850	Eukaryota	Archaeplastida	Chlorophyta	Ulvophyceae	Ulvales-relatives	Ulvales-relatives_X	Ulva	Ulva_compressa	0	0	0	0	0	0	0	0	0	0	0	0	0	0	0	0	0	0	0	0	0	0	0	2	0	0	0	0	0	0	0	0	0	0
OTU_2851	Eukaryota	Archaeplastida	Chlorophyta	Ulvophyceae	Ulvales-relatives	Ulvales-relatives_X	Ulva	Ulva_compressa	0	0	0	0	2	0	0	0	0	0	0	0	0	0	0	0	0	0	0	0	0	0	0	0	0	0	0	0	0	0	0	0	0	0
OTU_2852	Eukaryota	Archaeplastida	Chlorophyta	Ulvophyceae	Ulvales-relatives	Ulvales-relatives_X	Ulva	Ulva_compressa	0	0	0	0	0	0	0	0	0	0	0	0	0	0	0	0	0	0	0	0	0	0	0	2	0	0	0	0	0	0	0	0	0	0
OTU_2863	Eukaryota	Stramenopiles	Stramenopiles_X	Oomycota	Oomycota_X	Haliphthorales	Haliphthoros	Haliphthoros_sp.	0	0	0	0	0	0	0	0	0	0	0	0	0	0	0	3	0	0	0	0	0	0	0	0	0	0	0	0	0	0	0	0	0	0
OTU_2865	Eukaryota	Alveolata	Dinophyta	Syndiniales	Dino-Group-I	Dino-Group-I-Clade-1	Dino-Group-I-Clade-1_X	Dino-Group-I-Clade-1_X_sp.	0	0	0	0	0	0	0	0	0	0	0	0	0	0	0	0	0	0	0	0	0	0	0	0	0	0	0	0	0	2	0	0	0	0
OTU_2866	Eukaryota	Archaeplastida	Chlorophyta	Multi-affiliation	Multi-affiliation	Multi-affiliation	Multi-affiliation	Multi-affiliation	0	0	0	0	0	0	0	0	0	0	0	0	0	0	0	0	0	0	0	0	0	0	0	2	0	0	0	0	0	0	0	0	0	0
OTU_2869	Eukaryota	Opisthokonta	Fungi	Multi-affiliation	Multi-affiliation	Multi-affiliation	Multi-affiliation	Multi-affiliation	0	0	0	0	0	0	0	0	0	0	0	0	0	0	0	0	0	2	0	0	0	0	0	0	0	0	0	0	0	0	0	0	0	0
OTU_2870	Eukaryota	Opisthokonta	Fungi	Ascomycota	Taphrinomycotina	Taphrinomycetes	Taphrina	Multi-affiliation	2	0	0	0	0	0	0	0	0	0	0	0	0	0	0	0	0	0	0	0	0	0	0	0	0	0	0	0	0	0	0	0	0	0
OTU_2872	Eukaryota	Multi-affiliation	Multi-affiliation	Multi-affiliation	Multi-affiliation	Multi-affiliation	Multi-affiliation	Multi-affiliation	0	2	0	0	0	0	0	0	0	0	0	0	0	0	0	0	0	0	0	0	0	0	0	0	0	0	0	0	0	0	0	0	0	0
OTU_2878	Eukaryota	Alveolata	Dinophyta	Dinophyceae	Dinophyceae_X	Dinophyceae_XX	Protoperidinium	Protoperidinium_bipes	0	0	0	0	0	0	0	0	0	0	0	0	0	0	0	0	0	0	0	0	0	0	0	0	3	0	0	0	0	0	0	0	0	0
OTU_2880	Eukaryota	Alveolata	Dinophyta	Dinophyceae	Dinophyceae_X	Dinophyceae_XX	Protoperidinium	Protoperidinium_bipes	1	0	0	0	0	0	0	0	0	0	0	0	0	0	0	0	0	1	0	0	0	0	0	0	0	0	0	0	0	0	0	0	0	0
OTU_2882	Eukaryota	Alveolata	Dinophyta	Dinophyceae	Dinophyceae_X	Dinophyceae_XX	Protoperidinium	Protoperidinium_bipes	0	0	0	0	0	0	0	0	0	0	0	0	0	0	0	0	1	0	0	0	0	0	0	0	1	0	0	0	0	0	0	0	0	0
OTU_2883	Eukaryota	Alveolata	Dinophyta	Dinophyceae	Dinophyceae_X	Dinophyceae_XX	Protoperidinium	Protoperidinium_bipes	1	0	0	0	0	0	0	0	0	0	0	0	0	0	0	0	0	0	0	0	0	0	0	0	0	1	0	0	0	0	0	0	0	0
OTU_2884	Eukaryota	Alveolata	Dinophyta	Dinophyceae	Dinophyceae_X	Dinophyceae_XX	Protoperidinium	Protoperidinium_bipes	0	0	0	0	0	0	0	0	0	0	0	0	0	0	0	0	0	0	0	0	0	0	0	0	1	0	0	0	0	0	0	0	0	0
OTU_2885	Eukaryota	Alveolata	Dinophyta	Dinophyceae	Dinophyceae_X	Dinophyceae_XX	Protoperidinium	Protoperidinium_bipes	0	0	0	0	0	0	0	0	0	0	0	0	0	0	0	0	0	0	0	0	0	0	0	0	0	0	2	0	0	0	0	0	0	0
OTU_2886	Eukaryota	Alveolata	Dinophyta	Dinophyceae	Dinophyceae_X	Dinophyceae_XX	Protoperidinium	Protoperidinium_bipes	1	0	0	0	0	0	0	0	0	0	0	0	0	0	0	0	0	0	0	0	0	0	0	0	1	0	0	0	0	0	0	0	0	0
OTU_2887	Eukaryota	Alveolata	Dinophyta	Dinophyceae	Dinophyceae_X	Dinophyceae_XX	Protoperidinium	Protoperidinium_bipes	0	0	0	0	0	0	0	0	0	2	0	0	0	0	0	0	0	0	0	0	0	0	0	0	0	0	0	0	0	0	0	0	0	0
OTU_2890	Eukaryota	Alveolata	Dinophyta	Syndiniales	Dino-Group-II	Dino-Group-II-Clade-39	Dino-Group-II-Clade-39_X	Dino-Group-II-Clade-39_X_sp.	0	0	0	0	0	0	0	0	0	0	0	0	0	0	0	0	0	0	0	2	0	0	0	0	0	0	0	0	0	0	0	0	0	0
OTU_2892	Eukaryota	Archaeplastida	Chlorophyta	Multi-affiliation	Multi-affiliation	Multi-affiliation	Multi-affiliation	Multi-affiliation	0	0	0	0	0	0	0	0	0	0	0	0	0	0	0	2	0	0	0	0	0	0	0	0	0	0	0	0	0	0	0	0	0	0
OTU_2893	Eukaryota	Alveolata	Dinophyta	Syndiniales	Dino-Group-II	Dino-Group-II-Clade-39	Dino-Group-II-Clade-39_X	Dino-Group-II-Clade-39_X_sp.	0	0	0	0	0	0	0	0	0	0	0	0	0	0	0	0	0	0	0	2	0	0	0	0	0	0	0	0	0	0	0	0	0	0
OTU_2897	Eukaryota	Archaeplastida	Chlorophyta	Multi-affiliation	Multi-affiliation	Multi-affiliation	Multi-affiliation	Multi-affiliation	0	0	0	0	0	0	0	0	0	0	0	0	0	0	2	0	0	0	0	0	0	0	0	0	0	0	0	0	0	0	0	0	0	0
OTU_2898	Eukaryota	Archaeplastida	Chlorophyta	Multi-affiliation	Multi-affiliation	Multi-affiliation	Multi-affiliation	Multi-affiliation	0	0	0	0	0	0	0	0	0	0	0	0	0	0	0	0	0	0	0	0	0	0	1	1	0	0	0	0	0	0	0	0	0	0
OTU_2900	Eukaryota	Archaeplastida	Chlorophyta	Chlorodendrophyceae	Chlorodendrales	Chlorodendraceae	Chlorodendrales_XX	Chlorodendrales_XX_sp.	0	0	0	0	0	0	0	0	0	0	0	0	0	0	0	0	0	0	0	0	0	0	3	0	0	0	0	0	0	0	0	0	0	0
OTU_2907	Eukaryota	Alveolata	Dinophyta	Dinophyceae	Suessiales	Suessiales_X	Suessiales_XX	Suessiales_XX_sp.	0	0	0	0	0	0	0	0	0	0	0	0	0	0	0	0	0	0	0	0	0	0	0	0	0	0	0	0	0	0	0	0	2	0
OTU_2908	Eukaryota	Archaeplastida	Chlorophyta	Multi-affiliation	Multi-affiliation	Multi-affiliation	Multi-affiliation	Multi-affiliation	0	0	0	0	0	0	0	0	0	0	0	0	0	0	0	2	0	0	0	0	0	0	0	0	0	0	0	0	0	0	0	0	0	0
OTU_2909	Eukaryota	Archaeplastida	Chlorophyta	Multi-affiliation	Multi-affiliation	Multi-affiliation	Multi-affiliation	Multi-affiliation	0	0	0	0	0	0	0	0	0	0	0	0	0	0	0	0	0	0	0	0	0	0	0	0	0	2	0	0	0	0	0	0	0	0
OTU_2911	Eukaryota	Alveolata	Dinophyta	Dinophyceae	Dinophyceae_X	Dinophyceae_XX	Protoperidinium	Protoperidinium_bipes	0	0	0	0	0	0	0	0	0	0	0	0	0	0	0	0	0	2	0	0	0	0	0	0	0	0	0	0	0	0	0	0	0	0
OTU_2918	Eukaryota	Alveolata	Dinophyta	Dinophyceae	Dinophyceae_X	Pfiesteriaceae	Multi-affiliation	Multi-affiliation	0	0	0	0	0	0	0	0	0	0	0	0	0	0	0	0	0	0	0	0	0	0	0	0	0	0	0	2	0	0	0	0	0	0
OTU_2921	Eukaryota	Alveolata	Dinophyta	Dinophyceae	Suessiales	Suessiales_X	Multi-affiliation	Multi-affiliation	0	0	0	0	0	0	0	0	0	0	0	0	0	0	0	0	0	0	0	0	0	0	0	0	0	0	2	0	0	0	0	0	0	0
OTU_2923	Eukaryota	Alveolata	Dinophyta	Dinophyceae	Dinophyceae_X	Pfiesteriaceae	Multi-affiliation	Multi-affiliation	0	0	0	0	0	0	0	0	0	0	0	0	0	0	0	0	0	0	0	0	0	0	0	0	0	0	0	0	0	0	0	0	3	0
OTU_2927	Eukaryota	Alveolata	Dinophyta	Dinophyceae	Dinophyceae_X	Pfiesteriaceae	Multi-affiliation	Multi-affiliation	0	0	0	0	0	0	0	0	0	0	0	0	0	0	0	0	0	0	0	0	0	0	0	0	0	0	0	1	0	0	0	0	0	0
OTU_2932	Eukaryota	Alveolata	Dinophyta	Dinophyceae	Suessiales	Suessiales_X	Multi-affiliation	Multi-affiliation	0	0	0	0	0	0	0	0	0	0	0	0	2	0	0	0	0	0	0	0	0	0	0	0	0	0	0	0	0	0	0	0	0	0
OTU_2936	Eukaryota	Alveolata	Dinophyta	Dinophyceae	Suessiales	Suessiales_X	Polarella	Polarella_glacialis	0	0	0	0	0	0	0	0	0	0	0	0	0	0	0	0	0	0	0	0	0	0	0	0	0	0	2	0	0	0	0	0	0	0
OTU_2943	Eukaryota	Alveolata	Dinophyta	Dinophyceae	Suessiales	Suessiales_X	Multi-affiliation	Multi-affiliation	0	0	0	0	0	0	0	0	0	0	0	0	0	0	0	0	0	0	0	0	0	0	0	0	2	0	0	0	0	0	0	0	0	0
OTU_2944	Eukaryota	Alveolata	Dinophyta	Dinophyceae	Dinophyceae_X	Pfiesteriaceae	Multi-affiliation	Multi-affiliation	0	0	0	0	0	0	0	0	0	2	0	0	0	0	0	0	0	0	0	0	0	0	0	0	0	0	0	0	0	0	0	0	0	0
OTU_2945	Eukaryota	Stramenopiles	Ochrophyta	Bacillariophyta	Bacillariophyta_X	Polar-centric-Mediophyceae	Minidiscus	Multi-affiliation	0	0	0	0	0	0	0	0	0	2	0	0	0	0	0	0	0	0	0	0	0	0	0	0	0	0	0	0	0	0	0	0	0	0
OTU_2946	Eukaryota	Alveolata	Dinophyta	Dinophyceae	Suessiales	Suessiales_X	Multi-affiliation	Multi-affiliation	0	0	0	0	0	0	0	0	0	0	1	0	0	0	0	0	0	0	0	0	0	0	0	0	0	0	0	0	1	0	0	0	0	0
OTU_2947	Eukaryota	Alveolata	Dinophyta	Dinophyceae	Suessiales	Suessiales_X	Multi-affiliation	Multi-affiliation	0	0	0	0	0	0	0	0	0	0	0	0	0	0	0	0	0	0	0	0	0	0	0	0	1	0	0	0	0	0	0	0	0	0
OTU_2948	Eukaryota	Alveolata	Dinophyta	Dinophyceae	Dinophyceae_X	Dinophyceae_XX	Gymnodinium	Gymnodinium_sp.	0	0	0	0	0	0	0	0	0	0	0	0	0	0	0	0	0	0	0	0	2	0	0	0	0	0	0	0	0	0	0	0	0	0
OTU_2950	Eukaryota	Alveolata	Dinophyta	Dinophyceae	Dinophyceae_X	Dinophyceae_XX	Dinophyceae_XXX	Dinophyceae_XXX_sp.	0	0	0	0	0	0	0	0	0	0	0	0	0	0	0	0	0	0	0	0	0	0	0	0	0	0	0	0	0	0	0	0	2	0
OTU_2952	Eukaryota	Stramenopiles	Ochrophyta	Bacillariophyta	Bacillariophyta_X	Polar-centric-Mediophyceae	Multi-affiliation	Multi-affiliation	0	0	0	0	0	0	0	0	0	0	0	0	0	0	0	2	0	0	0	0	0	0	0	0	0	0	0	0	0	0	0	0	0	0
OTU_2953	Eukaryota	Stramenopiles	Ochrophyta	Bacillariophyta	Bacillariophyta_X	Polar-centric-Mediophyceae	Multi-affiliation	Multi-affiliation	0	0	0	0	0	0	0	0	0	0	0	0	0	0	3	0	0	0	0	0	0	0	0	0	0	0	0	0	0	0	0	0	0	0
OTU_2954	Eukaryota	Stramenopiles	Ochrophyta	Bacillariophyta	Bacillariophyta_X	Polar-centric-Mediophyceae	Multi-affiliation	Multi-affiliation	0	0	0	0	0	0	0	0	0	0	0	0	0	0	2	0	0	0	0	0	0	0	0	0	0	0	0	0	0	0	0	0	0	0
OTU_2955	Eukaryota	Stramenopiles	Ochrophyta	Bacillariophyta	Bacillariophyta_X	Polar-centric-Mediophyceae	Multi-affiliation	Multi-affiliation	0	0	0	0	0	0	0	0	0	0	0	0	0	0	0	0	0	0	0	0	0	0	2	0	0	0	0	0	0	0	0	0	0	0
OTU_2958	Eukaryota	Alveolata	Dinophyta	Dinophyceae	Suessiales	Suessiales_X	Multi-affiliation	Multi-affiliation	0	0	0	0	0	0	0	0	0	0	0	2	0	0	0	0	0	0	0	0	0	0	0	0	0	0	0	0	0	0	0	0	0	0
OTU_2959	Eukaryota	Alveolata	Dinophyta	Dinophyceae	Suessiales	Suessiales_X	Multi-affiliation	Multi-affiliation	0	0	0	0	0	0	0	0	0	0	0	0	0	0	0	0	0	0	0	0	0	0	0	0	0	0	0	0	0	0	2	0	0	0
OTU_2960	Eukaryota	Alveolata	Dinophyta	Dinophyceae	Suessiales	Suessiales_X	Multi-affiliation	Multi-affiliation	2	0	0	0	0	0	0	0	0	0	0	0	0	0	0	0	0	0	0	0	0	0	0	0	0	0	0	0	0	0	0	0	0	0
OTU_2962	Eukaryota	Alveolata	Dinophyta	Dinophyceae	Suessiales	Suessiales_X	Multi-affiliation	Multi-affiliation	0	0	0	0	0	0	0	0	0	0	0	0	0	0	0	0	0	0	0	0	0	0	0	0	0	0	0	0	0	0	0	2	0	0
OTU_2963	Eukaryota	Alveolata	Dinophyta	Dinophyceae	Suessiales	Suessiales_X	Polarella	Polarella_glacialis	0	0	0	0	0	0	0	2	0	0	0	0	0	0	0	0	0	0	0	0	0	0	0	0	0	0	0	0	0	0	0	0	0	0
OTU_2968	Eukaryota	Alveolata	Dinophyta	Dinophyceae	Suessiales	Suessiales_X	Multi-affiliation	Multi-affiliation	2	0	0	0	0	0	0	0	0	0	0	0	0	0	0	0	0	0	0	0	0	0	0	0	0	0	0	0	0	0	0	0	0	0
OTU_2970	Eukaryota	Alveolata	Dinophyta	Dinophyceae	Suessiales	Suessiales_X	Multi-affiliation	Multi-affiliation	0	0	0	0	0	0	0	0	0	0	0	0	2	0	0	0	0	0	0	0	0	0	0	0	0	0	0	0	0	0	0	0	0	0
OTU_2971	Eukaryota	Alveolata	Dinophyta	Dinophyceae	Suessiales	Suessiales_X	Multi-affiliation	Multi-affiliation	0	0	0	0	0	0	0	0	0	0	0	0	0	0	0	0	0	0	0	0	0	0	0	0	0	0	0	2	0	0	0	0	0	0
OTU_2972	Eukaryota	Alveolata	Dinophyta	Dinophyceae	Suessiales	Suessiales_X	Multi-affiliation	Multi-affiliation	0	0	0	0	0	0	0	0	0	0	0	0	0	0	0	0	0	0	0	0	0	0	0	0	0	0	2	0	0	0	0	0	0	0
OTU_2974	Eukaryota	Alveolata	Dinophyta	Dinophyceae	Suessiales	Suessiales_X	Multi-affiliation	Multi-affiliation	0	0	0	0	0	0	0	0	0	0	0	0	0	0	0	0	0	0	0	0	0	0	0	0	0	0	0	0	0	0	0	0	2	0
OTU_2976	Eukaryota	Alveolata	Dinophyta	Dinophyceae	Suessiales	Suessiales_X	Polarella	Polarella_glacialis	0	0	0	0	0	1	0	1	0	0	0	0	1	0	0	0	0	0	0	0	0	0	0	0	2	0	1	0	0	1	0	0	1	0
OTU_2977	Eukaryota	Alveolata	Dinophyta	Dinophyceae	Suessiales	Suessiales_X	Multi-affiliation	Multi-affiliation	0	0	0	0	0	0	0	0	0	0	0	0	0	1	0	0	0	0	0	0	0	0	0	0	0	0	0	0	0	0	0	0	0	0
OTU_2979	Eukaryota	Alveolata	Dinophyta	Dinophyceae	Suessiales	Suessiales_X	Multi-affiliation	Multi-affiliation	0	0	0	0	0	0	0	0	0	0	0	0	0	0	0	0	0	0	0	0	0	0	0	0	2	0	0	0	0	0	0	0	0	0
OTU_2980	Eukaryota	Alveolata	Dinophyta	Dinophyceae	Suessiales	Suessiales_X	Multi-affiliation	Multi-affiliation	0	0	0	0	0	0	0	0	0	0	0	0	0	0	0	0	0	0	0	0	0	0	0	0	2	0	0	0	0	0	0	0	0	0
OTU_2984	Eukaryota	Alveolata	Dinophyta	Dinophyceae	Suessiales	Suessiales_X	Multi-affiliation	Multi-affiliation	0	0	0	0	0	0	0	1	0	0	0	0	0	0	0	0	0	0	0	0	0	0	0	0	0	0	0	0	0	0	0	0	0	0
OTU_2989	Eukaryota	Alveolata	Dinophyta	Dinophyceae	Suessiales	Suessiales_X	Multi-affiliation	Multi-affiliation	0	0	0	0	0	0	0	0	0	0	2	0	0	0	0	0	0	0	0	0	0	0	0	0	0	0	0	0	0	0	0	0	0	0
OTU_2990	Eukaryota	Alveolata	Dinophyta	Dinophyceae	Suessiales	Suessiales_X	Polarella	Polarella_glacialis	0	0	0	0	0	1	0	0	0	0	0	0	0	0	0	0	0	0	0	0	0	0	0	0	0	0	0	0	0	0	0	0	0	0
OTU_2991	Eukaryota	Alveolata	Dinophyta	Dinophyceae	Suessiales	Suessiales_X	Polarella	Polarella_glacialis	0	1	0	0	0	0	0	1	0	0	0	0	0	0	0	0	0	0	0	0	0	0	0	0	0	0	0	0	0	0	0	0	0	0
OTU_2992	Eukaryota	Alveolata	Dinophyta	Dinophyceae	Dinophyceae_X	Dinophyceae_XX	Dinophyceae_XXX	Dinophyceae_XXX_sp.	0	0	0	0	0	0	0	0	0	0	0	0	0	0	0	0	0	0	0	0	0	2	0	0	0	0	0	0	0	0	0	0	0	0
OTU_2993	Eukaryota	Alveolata	Dinophyta	Dinophyceae	Suessiales	Suessiales_X	Multi-affiliation	Multi-affiliation	0	0	0	0	0	0	0	1	0	0	0	0	0	0	0	0	0	0	0	0	0	0	0	0	0	0	0	0	0	0	0	0	0	0
OTU_2994	Eukaryota	Alveolata	Dinophyta	Dinophyceae	Suessiales	Suessiales_X	Pelagodinium	Pelagodinium_beii	0	0	0	0	0	0	0	0	0	0	0	0	0	0	0	0	0	0	1	0	0	0	0	0	0	0	0	0	0	1	0	0	0	0
OTU_2996	Eukaryota	Alveolata	Dinophyta	Dinophyceae	Suessiales	Suessiales_X	Multi-affiliation	Multi-affiliation	2	0	0	0	0	0	0	0	3	0	0	0	0	0	0	0	0	0	0	0	1	0	0	0	0	0	0	0	0	0	0	0	0	0
OTU_2997	Eukaryota	Alveolata	Dinophyta	Dinophyceae	Suessiales	Suessiales_X	Pelagodinium	Pelagodinium_beii	0	0	2	0	0	0	0	0	0	0	0	0	0	0	0	0	0	0	0	0	0	0	0	0	0	0	0	0	0	0	0	0	0	0
OTU_2999	Eukaryota	Alveolata	Dinophyta	Dinophyceae	Suessiales	Suessiales_X	Multi-affiliation	Multi-affiliation	0	0	0	0	0	0	0	0	0	0	0	0	0	0	0	0	0	0	0	0	0	0	0	0	0	0	0	2	0	0	0	0	0	0
OTU_3000	Eukaryota	Alveolata	Dinophyta	Dinophyceae	Suessiales	Suessiales_X	Multi-affiliation	Multi-affiliation	0	0	0	0	0	0	0	0	0	0	0	0	0	0	0	0	0	0	0	0	0	0	0	0	0	0	0	0	0	0	0	2	0	0
OTU_3001	Eukaryota	Alveolata	Dinophyta	Dinophyceae	Suessiales	Suessiales_X	Multi-affiliation	Multi-affiliation	0	0	0	1	0	0	0	0	0	0	0	0	1	0	0	0	0	0	1	0	0	0	0	0	0	1	0	0	0	0	0	0	0	0
OTU_3002	Eukaryota	Alveolata	Dinophyta	Dinophyceae	Suessiales	Suessiales_X	Multi-affiliation	Multi-affiliation	0	0	0	0	0	0	0	0	0	0	0	0	0	0	0	0	0	0	0	0	0	0	0	0	0	0	0	0	0	2	0	0	0	0
OTU_3003	Eukaryota	Alveolata	Dinophyta	Dinophyceae	Suessiales	Suessiales_X	Multi-affiliation	Multi-affiliation	0	0	0	0	0	0	0	0	0	0	0	0	0	2	0	0	0	0	0	0	0	0	0	0	0	0	0	0	0	0	0	0	0	0
OTU_3004	Eukaryota	Alveolata	Dinophyta	Dinophyceae	Suessiales	Suessiales_X	Multi-affiliation	Multi-affiliation	0	0	0	0	0	0	0	1	0	0	0	0	0	0	0	0	0	0	0	0	0	0	0	0	1	0	0	0	0	0	0	0	0	0
OTU_3005	Eukaryota	Alveolata	Dinophyta	Dinophyceae	Suessiales	Suessiales_X	Multi-affiliation	Multi-affiliation	0	0	0	0	0	0	0	0	0	0	0	0	0	0	0	0	0	0	0	0	0	0	0	0	0	0	2	0	0	0	0	0	0	0
OTU_3006	Eukaryota	Alveolata	Dinophyta	Dinophyceae	Suessiales	Suessiales_X	Multi-affiliation	Multi-affiliation	0	0	0	0	0	2	0	0	0	0	0	0	0	0	0	0	0	0	0	0	0	0	0	0	0	0	0	0	0	0	0	0	0	0
OTU_3007	Eukaryota	Alveolata	Dinophyta	Dinophyceae	Suessiales	Suessiales_X	Multi-affiliation	Multi-affiliation	0	0	1	0	0	0	1	0	0	0	0	0	0	0	0	0	0	0	0	0	0	0	0	0	0	2	0	0	0	0	0	0	0	1
OTU_3008	Eukaryota	Alveolata	Dinophyta	Dinophyceae	Suessiales	Suessiales_X	Polarella	Polarella_glacialis	0	0	0	0	0	0	0	0	0	0	0	0	0	0	0	0	0	0	0	0	1	0	0	0	0	0	0	0	1	0	0	0	0	0
OTU_3009	Eukaryota	Alveolata	Dinophyta	Dinophyceae	Suessiales	Suessiales_X	Multi-affiliation	Multi-affiliation	0	0	0	0	0	0	0	0	0	2	0	0	0	0	0	0	0	0	0	0	0	0	0	0	1	0	0	0	0	0	0	0	0	0
OTU_3011	Eukaryota	Alveolata	Dinophyta	Dinophyceae	Suessiales	Suessiales_X	Multi-affiliation	Multi-affiliation	0	0	0	0	0	0	0	0	0	0	0	0	0	1	0	0	0	0	0	0	0	0	0	0	1	0	0	0	0	0	0	1	0	0
OTU_3012	Eukaryota	Alveolata	Dinophyta	Dinophyceae	Suessiales	Suessiales_X	Multi-affiliation	Multi-affiliation	0	0	0	0	0	0	0	0	0	1	0	0	0	0	0	0	0	0	1	0	0	0	0	0	1	0	0	0	0	0	0	0	0	0
OTU_3015	Eukaryota	Alveolata	Dinophyta	Dinophyceae	Suessiales	Suessiales_X	Multi-affiliation	Multi-affiliation	0	0	0	0	0	0	0	1	0	0	0	0	0	0	0	0	0	0	0	0	0	0	0	0	1	1	0	0	0	0	0	0	0	0
OTU_3017	Eukaryota	Alveolata	Dinophyta	Dinophyceae	Suessiales	Suessiales_X	Polarella	Polarella_glacialis	0	0	0	0	0	0	0	0	0	0	0	0	0	0	0	0	0	0	0	0	0	0	0	0	0	0	0	0	0	0	0	0	1	0
OTU_3018	Eukaryota	Alveolata	Dinophyta	Dinophyceae	Suessiales	Suessiales_X	Multi-affiliation	Multi-affiliation	2	0	0	0	0	0	0	0	0	0	0	0	0	0	0	0	0	0	0	0	0	0	0	0	0	0	0	0	0	0	0	0	0	0
OTU_3019	Eukaryota	Alveolata	Dinophyta	Dinophyceae	Suessiales	Suessiales_X	Pelagodinium	Pelagodinium_beii	2	0	0	0	0	0	0	0	0	0	0	0	0	0	0	0	0	0	0	0	0	0	0	0	0	0	0	0	0	0	0	0	0	0
OTU_3020	Eukaryota	Alveolata	Dinophyta	Dinophyceae	Suessiales	Suessiales_X	Multi-affiliation	Multi-affiliation	0	0	0	0	0	0	0	0	0	0	0	0	0	0	0	0	1	0	0	0	0	0	0	0	0	0	0	0	0	0	0	0	0	0
OTU_3022	Eukaryota	Alveolata	Dinophyta	Dinophyceae	Suessiales	Suessiales_X	Multi-affiliation	Multi-affiliation	0	0	0	0	0	0	0	0	0	0	0	0	0	0	0	0	0	0	0	0	0	0	0	0	2	0	0	0	0	0	0	0	0	0
OTU_3025	Eukaryota	Alveolata	Dinophyta	Dinophyceae	Suessiales	Suessiales_X	Polarella	Polarella_glacialis	0	0	0	0	0	0	0	0	0	0	0	0	0	0	0	0	0	0	0	0	0	0	0	0	0	0	0	0	0	1	0	0	1	0
OTU_3027	Eukaryota	Alveolata	Dinophyta	Dinophyceae	Suessiales	Suessiales_X	Multi-affiliation	Multi-affiliation	0	0	0	0	0	0	0	0	0	0	0	0	0	0	0	0	0	0	0	0	0	0	0	0	0	2	0	0	0	0	0	0	0	0
OTU_3028	Eukaryota	Alveolata	Dinophyta	Dinophyceae	Suessiales	Suessiales_X	Multi-affiliation	Multi-affiliation	0	0	0	0	0	0	0	0	0	2	0	0	0	0	0	0	0	0	0	0	0	0	0	0	0	0	0	0	0	0	0	0	0	0
OTU_3029	Eukaryota	Alveolata	Dinophyta	Dinophyceae	Suessiales	Suessiales_X	Multi-affiliation	Multi-affiliation	0	0	0	0	0	0	0	0	0	0	0	0	0	0	0	0	0	0	0	0	0	0	0	0	0	0	0	0	0	1	0	0	0	0
OTU_3034	Eukaryota	Alveolata	Dinophyta	Dinophyceae	Suessiales	Suessiales_X	Multi-affiliation	Multi-affiliation	0	0	0	0	0	0	0	0	0	0	0	0	0	0	0	0	0	0	2	0	0	0	0	0	0	0	0	0	0	0	0	0	0	0
OTU_3036	Eukaryota	Alveolata	Dinophyta	Dinophyceae	Suessiales	Suessiales_X	Multi-affiliation	Multi-affiliation	0	0	0	0	0	0	0	0	0	1	0	0	0	0	0	0	1	0	0	0	0	0	0	0	0	1	0	0	0	0	0	0	0	0
OTU_3037	Eukaryota	Alveolata	Dinophyta	Dinophyceae	Suessiales	Suessiales_X	Polarella	Polarella_glacialis	0	0	0	0	0	2	0	0	0	0	0	0	0	0	0	0	0	0	0	0	0	0	0	0	0	0	0	0	0	0	0	0	0	0
OTU_3038	Eukaryota	Alveolata	Dinophyta	Dinophyceae	Suessiales	Suessiales_X	Pelagodinium	Pelagodinium_beii	0	0	0	0	0	0	0	0	0	0	2	0	0	0	0	0	0	0	0	0	0	0	0	0	0	0	0	0	0	0	0	0	0	0
OTU_3039	Eukaryota	Alveolata	Dinophyta	Dinophyceae	Suessiales	Suessiales_X	Multi-affiliation	Multi-affiliation	0	0	0	0	0	0	0	0	0	0	0	0	0	0	0	0	0	0	0	0	0	0	0	0	0	0	0	0	0	2	0	0	0	0
OTU_3040	Eukaryota	Alveolata	Dinophyta	Dinophyceae	Dinophyceae_X	Dinophyceae_XX	Heterocapsa	Multi-affiliation	0	0	2	0	0	0	0	0	0	0	0	0	0	0	0	0	0	0	0	0	0	0	0	0	0	0	0	0	0	0	0	0	0	0
OTU_3041	Eukaryota	Alveolata	Dinophyta	Dinophyceae	Suessiales	Suessiales_X	Polarella	Polarella_glacialis	0	0	2	0	0	0	0	0	0	0	0	0	0	0	0	0	0	0	0	0	0	0	0	0	0	0	0	0	0	0	0	0	0	0
OTU_3042	Eukaryota	Alveolata	Dinophyta	Dinophyceae	Dinophyceae_X	Dinophyceae_XX	Dinophyceae_XXX	Dinophyceae_XXX_sp.	0	0	0	0	0	0	0	0	0	0	0	0	0	0	0	0	0	0	0	0	0	0	0	0	0	2	0	0	0	0	0	0	0	0
OTU_3043	Eukaryota	Alveolata	Dinophyta	Dinophyceae	Suessiales	Suessiales_X	Multi-affiliation	Multi-affiliation	0	0	0	0	0	1	0	1	0	0	0	0	0	0	0	0	0	0	0	0	0	0	0	0	0	0	0	0	0	0	0	0	0	0
OTU_3044	Eukaryota	Alveolata	Dinophyta	Dinophyceae	Suessiales	Suessiales_X	Polarella	Polarella_glacialis	0	0	0	0	0	0	0	0	0	0	0	0	2	0	0	0	0	0	0	0	0	0	0	0	0	0	0	0	0	0	0	0	0	0
OTU_3046	Eukaryota	Alveolata	Dinophyta	Dinophyceae	Suessiales	Suessiales_X	Multi-affiliation	Multi-affiliation	0	0	0	0	0	0	0	0	0	0	0	0	0	0	0	0	0	0	0	0	0	0	0	0	0	0	1	0	0	0	0	0	1	0
OTU_3047	Eukaryota	Alveolata	Dinophyta	Dinophyceae	Suessiales	Suessiales_X	Multi-affiliation	Multi-affiliation	0	0	0	0	0	0	0	0	0	0	0	0	0	0	0	0	0	0	0	0	0	0	0	0	0	2	0	0	0	0	0	0	0	0
OTU_3048	Eukaryota	Alveolata	Dinophyta	Dinophyceae	Suessiales	Suessiales_X	Multi-affiliation	Multi-affiliation	0	0	0	0	0	0	0	0	0	0	0	0	0	0	0	0	0	0	0	0	0	0	0	0	2	0	0	0	0	0	0	0	0	0
OTU_3050	Eukaryota	Alveolata	Dinophyta	Dinophyceae	Suessiales	Suessiales_X	Multi-affiliation	Multi-affiliation	0	0	0	0	0	0	2	0	0	0	0	0	0	0	0	0	0	0	0	0	0	0	0	0	0	0	0	0	0	0	0	0	0	0
OTU_3051	Eukaryota	Alveolata	Dinophyta	Dinophyceae	Suessiales	Suessiales_X	Multi-affiliation	Multi-affiliation	0	0	0	0	0	0	0	0	0	0	0	0	0	0	0	0	0	0	0	0	0	0	0	0	0	0	0	0	0	0	0	0	2	0
OTU_3052	Eukaryota	Alveolata	Dinophyta	Dinophyceae	Suessiales	Suessiales_X	Pelagodinium	Pelagodinium_beii	0	0	0	0	0	0	0	0	0	0	0	0	0	0	0	0	0	0	0	0	0	0	0	0	0	2	0	0	0	0	0	0	0	0
OTU_3053	Eukaryota	Alveolata	Dinophyta	Dinophyceae	Dinophyceae_X	Dinophyceae_XX	Dinophyceae_XXX	Dinophyceae_XXX_sp.	0	0	0	0	0	0	0	0	0	0	0	0	0	0	0	0	0	0	0	0	0	0	0	0	0	0	0	2	0	0	0	0	0	0
OTU_3054	Eukaryota	Stramenopiles	Ochrophyta	Bacillariophyta	Bacillariophyta_X	Polar-centric-Mediophyceae	Thalassiosira	Thalassiosira_sp.	0	0	0	0	0	0	0	0	0	0	0	0	0	0	0	0	0	0	0	0	0	0	0	2	0	0	0	0	0	0	0	0	0	0
OTU_3055	Eukaryota	Alveolata	Dinophyta	Dinophyceae	Dinophyceae_X	Dinophyceae_XX	Dinophyceae_XXX	Dinophyceae_XXX_sp.	0	0	0	0	0	0	0	0	0	0	0	0	0	0	0	0	0	0	0	0	0	0	0	2	0	0	0	0	0	0	0	0	0	0
OTU_3056	Eukaryota	Alveolata	Dinophyta	Dinophyceae	Dinophyceae_X	Dinophyceae_XX	Dinophyceae_XXX	Dinophyceae_XXX_sp.	0	0	0	0	0	0	0	0	0	0	0	0	0	0	0	0	0	0	0	0	0	0	0	0	0	2	0	0	0	0	0	0	0	0
OTU_3057	Eukaryota	Alveolata	Dinophyta	Dinophyceae	Dinophyceae_X	Dinophyceae_XX	Dinophyceae_XXX	Dinophyceae_XXX_sp.	0	0	0	0	0	0	0	0	0	0	0	0	0	0	0	0	0	0	0	0	0	0	2	0	0	0	0	0	0	0	0	0	0	0
OTU_3059	Eukaryota	Alveolata	Dinophyta	Dinophyceae	Dinophyceae_X	Dinophyceae_XX	Multi-affiliation	Multi-affiliation	0	0	0	0	0	0	0	0	0	0	0	0	0	0	0	2	0	0	0	0	0	0	0	0	0	0	0	0	0	0	0	0	0	0
OTU_3061	Eukaryota	Alveolata	Dinophyta	Dinophyceae	Dinophyceae_X	Dinophyceae_XX	Dinophyceae_XXX	Dinophyceae_XXX_sp.	0	0	0	0	0	0	0	0	0	0	0	0	0	0	0	2	0	0	0	0	0	0	0	0	0	0	0	0	0	0	0	0	0	0
OTU_3063	Eukaryota	Alveolata	Dinophyta	Dinophyceae	Dinophyceae_X	Dinophyceae_XX	Multi-affiliation	Multi-affiliation	0	0	0	0	0	0	0	0	0	0	0	0	0	0	0	2	0	0	0	0	0	0	0	0	0	0	0	0	0	0	0	0	0	0
OTU_3064	Eukaryota	Alveolata	Dinophyta	Dinophyceae	Dinophyceae_X	Dinophyceae_XX	Dinophyceae_XXX	Dinophyceae_XXX_sp.	0	0	0	0	2	0	0	0	0	0	0	0	0	0	0	0	0	0	0	0	0	0	0	0	0	0	0	0	0	0	0	0	0	0
OTU_3065	Eukaryota	Alveolata	Dinophyta	Dinophyceae	Dinophyceae_X	Dinophyceae_XX	Dinophyceae_XXX	Dinophyceae_XXX_sp.	0	0	0	0	0	0	0	0	0	0	0	0	0	0	0	2	0	0	0	0	0	0	0	0	0	0	0	0	0	0	0	0	0	0
OTU_3066	Eukaryota	Alveolata	Dinophyta	Dinophyceae	Dinophyceae_X	Dinophyceae_XX	Multi-affiliation	Multi-affiliation	0	0	0	0	2	0	0	0	0	0	0	0	0	0	0	0	0	0	0	0	0	0	0	0	0	0	0	0	0	0	0	0	0	0
OTU_3067	Eukaryota	Alveolata	Dinophyta	Dinophyceae	Dinophyceae_X	Dinophyceae_XX	Dinophyceae_XXX	Dinophyceae_XXX_sp.	0	0	2	0	0	0	0	0	0	0	0	0	0	0	0	0	0	0	0	0	0	0	0	0	0	0	0	0	0	0	0	0	0	0
OTU_3068	Eukaryota	Stramenopiles	Ochrophyta	Bacillariophyta	Bacillariophyta_X	Polar-centric-Mediophyceae	Thalassiosira	Multi-affiliation	0	0	0	0	0	0	0	0	0	0	0	0	0	0	0	0	0	0	0	0	0	0	0	3	0	0	0	0	0	0	0	0	0	0
OTU_3070	Eukaryota	Alveolata	Dinophyta	Dinophyceae	Dinophyceae_X	Dinophyceae_XX	Dinophyceae_XXX	Dinophyceae_XXX_sp.	0	0	0	0	0	0	0	0	0	0	0	0	2	0	0	0	0	0	0	0	0	0	0	0	0	0	0	0	0	0	0	0	0	0
OTU_3071	Eukaryota	Alveolata	Dinophyta	Dinophyceae	Dinophyceae_X	Dinophyceae_XX	Gymnodinium	Gymnodinium_sp.	0	0	0	0	0	0	0	0	0	0	0	0	0	0	0	0	0	0	0	0	0	0	0	0	0	0	0	0	0	0	0	0	2	0
OTU_3072	Eukaryota	Alveolata	Dinophyta	Dinophyceae	Dinophyceae_X	Dinophyceae_XX	Dinophyceae_XXX	Dinophyceae_XXX_sp.	0	0	0	0	0	0	0	0	0	0	0	0	0	0	0	0	0	0	0	0	2	0	0	0	0	0	0	0	0	0	0	0	0	0
OTU_3074	Eukaryota	Stramenopiles	Ochrophyta	Bacillariophyta	Bacillariophyta_X	Polar-centric-Mediophyceae	Multi-affiliation	Multi-affiliation	0	0	0	0	0	0	0	0	0	0	0	0	0	0	0	2	0	0	0	0	0	0	0	0	0	0	0	0	0	0	0	0	0	0
OTU_3077	Eukaryota	Stramenopiles	Ochrophyta	Bacillariophyta	Bacillariophyta_X	Polar-centric-Mediophyceae	Multi-affiliation	Multi-affiliation	0	0	0	0	0	0	0	0	0	0	0	0	0	0	2	0	0	0	0	0	0	0	0	0	0	0	0	0	0	0	0	0	0	0
OTU_3078	Eukaryota	Stramenopiles	Ochrophyta	Bacillariophyta	Bacillariophyta_X	Polar-centric-Mediophyceae	Multi-affiliation	Multi-affiliation	0	0	0	0	0	0	0	0	0	0	0	0	0	0	0	2	0	0	0	0	0	0	0	0	0	0	0	0	0	0	0	0	0	0
OTU_3080	Eukaryota	Stramenopiles	Ochrophyta	Bacillariophyta	Bacillariophyta_X	Polar-centric-Mediophyceae	Multi-affiliation	Multi-affiliation	0	0	0	0	0	0	0	0	0	0	0	0	0	0	0	0	0	0	0	0	0	0	2	0	0	0	0	0	0	0	0	0	0	0
OTU_3081	Eukaryota	Stramenopiles	Ochrophyta	Bacillariophyta	Bacillariophyta_X	Polar-centric-Mediophyceae	Multi-affiliation	Multi-affiliation	0	0	0	0	0	0	0	0	0	0	0	0	0	0	0	2	0	0	0	0	0	0	0	0	0	0	0	0	0	0	0	0	0	0
OTU_3082	Eukaryota	Stramenopiles	Ochrophyta	Bacillariophyta	Bacillariophyta_X	Polar-centric-Mediophyceae	Multi-affiliation	Multi-affiliation	0	0	0	0	0	0	0	0	0	0	0	0	0	0	0	2	0	0	0	0	0	0	0	0	0	0	0	0	0	0	0	0	0	0
OTU_3083	Eukaryota	Stramenopiles	Ochrophyta	Bacillariophyta	Bacillariophyta_X	Polar-centric-Mediophyceae	Multi-affiliation	Multi-affiliation	0	0	0	0	0	0	0	0	0	0	0	0	0	0	0	0	0	0	0	0	0	0	0	2	0	0	0	0	0	0	0	0	0	0
OTU_3088	Eukaryota	Stramenopiles	Ochrophyta	Bacillariophyta	Bacillariophyta_X	Polar-centric-Mediophyceae	Multi-affiliation	Multi-affiliation	0	0	0	0	0	0	0	0	0	0	0	0	0	0	0	0	0	0	0	0	0	0	0	2	0	0	0	0	0	0	0	0	0	0
OTU_3089	Eukaryota	Stramenopiles	Ochrophyta	Bacillariophyta	Bacillariophyta_X	Polar-centric-Mediophyceae	Multi-affiliation	Multi-affiliation	0	0	0	0	0	0	0	0	0	0	0	0	0	0	1	0	0	0	0	0	0	0	0	0	0	0	0	0	0	0	0	0	0	0
OTU_3090	Eukaryota	Stramenopiles	Ochrophyta	Bacillariophyta	Bacillariophyta_X	Polar-centric-Mediophyceae	Multi-affiliation	Multi-affiliation	0	0	0	0	0	0	0	0	0	0	0	0	0	0	0	1	0	0	0	0	0	0	0	0	0	0	0	0	0	0	0	0	0	0
OTU_3091	Eukaryota	Stramenopiles	Ochrophyta	Bacillariophyta	Bacillariophyta_X	Polar-centric-Mediophyceae	Multi-affiliation	Multi-affiliation	0	0	0	0	0	0	0	0	0	0	0	0	0	0	2	0	0	0	0	0	0	0	0	0	0	0	0	0	0	0	0	0	0	0
OTU_3092	Eukaryota	Stramenopiles	Ochrophyta	Bacillariophyta	Bacillariophyta_X	Polar-centric-Mediophyceae	Multi-affiliation	Multi-affiliation	0	0	0	0	1	0	0	0	0	0	0	0	0	0	0	0	0	0	0	0	0	0	1	0	0	0	0	0	0	0	0	0	0	0
OTU_3093	Eukaryota	Stramenopiles	Ochrophyta	Bacillariophyta	Bacillariophyta_X	Polar-centric-Mediophyceae	Multi-affiliation	Multi-affiliation	0	0	0	0	0	0	0	0	0	0	0	0	0	0	0	0	0	0	0	0	0	0	1	1	0	0	0	0	0	0	0	0	0	0
OTU_3094	Eukaryota	Stramenopiles	Ochrophyta	Bacillariophyta	Bacillariophyta_X	Polar-centric-Mediophyceae	Multi-affiliation	Multi-affiliation	0	0	0	0	0	0	0	0	0	0	0	0	0	0	0	0	0	0	0	0	0	0	1	0	0	0	0	0	0	0	0	0	0	0
OTU_3095	Eukaryota	Stramenopiles	Ochrophyta	Bacillariophyta	Bacillariophyta_X	Polar-centric-Mediophyceae	Multi-affiliation	Multi-affiliation	0	0	0	0	0	0	0	0	0	0	0	0	0	0	0	1	0	0	0	0	0	0	0	0	0	0	0	0	0	0	0	0	0	0
OTU_3096	Eukaryota	Stramenopiles	Ochrophyta	Bacillariophyta	Bacillariophyta_X	Polar-centric-Mediophyceae	Multi-affiliation	Multi-affiliation	0	0	0	0	0	0	0	0	0	0	0	0	0	0	0	2	0	0	0	0	0	0	0	0	0	0	0	0	0	0	0	0	0	0
OTU_3101	Eukaryota	Stramenopiles	Ochrophyta	Bacillariophyta	Bacillariophyta_X	Polar-centric-Mediophyceae	Multi-affiliation	Multi-affiliation	0	0	0	0	0	0	0	0	0	0	0	0	0	0	1	0	0	0	0	0	0	0	0	0	0	0	0	0	0	0	0	0	0	0
OTU_3102	Eukaryota	Stramenopiles	Ochrophyta	Bacillariophyta	Bacillariophyta_X	Polar-centric-Mediophyceae	Multi-affiliation	Multi-affiliation	0	0	0	0	2	0	0	0	0	0	0	0	0	0	2	0	0	0	0	0	0	0	0	0	0	0	0	0	0	0	0	0	0	0
OTU_3103	Eukaryota	Stramenopiles	Ochrophyta	Bacillariophyta	Bacillariophyta_X	Polar-centric-Mediophyceae	Multi-affiliation	Multi-affiliation	0	0	0	0	0	0	0	0	0	0	0	0	0	0	2	0	0	0	0	0	0	0	0	0	0	0	0	0	0	0	0	0	0	0
OTU_3104	Eukaryota	Stramenopiles	Ochrophyta	Bacillariophyta	Bacillariophyta_X	Polar-centric-Mediophyceae	Multi-affiliation	Multi-affiliation	0	0	0	0	0	0	0	0	0	0	0	0	0	0	0	0	0	0	0	0	0	0	0	2	0	0	0	0	0	0	0	0	0	0
OTU_3106	Eukaryota	Stramenopiles	Ochrophyta	Bacillariophyta	Bacillariophyta_X	Polar-centric-Mediophyceae	Multi-affiliation	Multi-affiliation	0	0	0	0	0	0	0	0	0	0	0	0	0	0	1	1	0	0	0	0	0	0	0	0	0	0	0	0	0	0	0	0	0	0
OTU_3107	Eukaryota	Stramenopiles	Ochrophyta	Bacillariophyta	Bacillariophyta_X	Polar-centric-Mediophyceae	Multi-affiliation	Multi-affiliation	0	0	0	0	0	0	0	0	0	0	0	0	0	0	2	0	0	0	0	0	0	0	0	0	0	0	0	0	0	0	0	0	0	0
OTU_3108	Eukaryota	Alveolata	Dinophyta	Dinophyceae	Suessiales	Suessiales_X	Suessiales_XX	Suessiales_XX_sp.	0	0	0	0	0	0	0	0	0	0	0	0	0	0	0	0	0	0	0	0	0	0	0	0	0	0	0	0	0	2	0	0	0	0
OTU_3111	Eukaryota	Alveolata	Dinophyta	Dinophyceae	Suessiales	Suessiales_X	Suessiales_XX	Suessiales_XX_sp.	0	0	2	0	0	0	0	0	0	0	0	0	0	0	0	0	0	0	0	0	0	0	0	0	0	0	0	0	0	0	0	0	0	0
OTU_3112	Eukaryota	Opisthokonta	Mesomycetozoa	Ichthyosporea	Ichthyosphonida	Abeoformidae_Group_MAIP_1	Abeoformidae_Group_MAIP_1_X	Abeoformidae_Group_MAIP_1_X_sp.	0	0	0	0	0	0	0	0	0	0	0	0	0	0	0	0	0	0	0	0	2	0	0	0	0	0	0	0	0	0	0	0	0	0
OTU_3118	Eukaryota	Alveolata	Dinophyta	Dinophyceae	Suessiales	Suessiales_X	Woloszynskia	Woloszynskia_cincta	0	0	1	0	0	0	0	0	0	0	0	0	1	0	0	0	0	0	0	0	0	0	0	0	0	0	0	0	0	0	0	0	0	0
OTU_3119	Eukaryota	Alveolata	Dinophyta	Dinophyceae	Dinophyceae_X	Dinophyceae_XX	Dinophyceae_XXX	Dinophyceae_XXX_sp.	0	0	0	0	0	0	0	0	0	0	0	0	0	0	0	0	0	0	0	0	0	0	0	0	0	0	0	0	0	2	0	0	0	0
OTU_3120	Eukaryota	Alveolata	Dinophyta	Dinophyceae	Multi-affiliation	Multi-affiliation	Multi-affiliation	Multi-affiliation	0	2	0	0	0	0	0	0	0	0	0	0	0	0	0	0	0	0	0	0	0	0	0	0	0	0	0	0	0	0	0	0	0	0
OTU_3121	Eukaryota	Alveolata	Dinophyta	Dinophyceae	Suessiales	Suessiales_X	Suessiales_XX	Suessiales_XX_sp.	0	0	0	0	0	0	0	0	0	0	0	0	0	0	0	0	0	0	0	0	2	0	0	0	0	0	0	0	0	0	0	0	0	0
OTU_3125	Eukaryota	Alveolata	Dinophyta	Dinophyceae	Dinophyceae_X	Dinophyceae_XX	Dinophyceae_XXX	Dinophyceae_XXX_sp.	0	0	0	0	0	0	0	0	0	0	0	0	0	0	0	0	0	0	0	0	0	0	0	0	0	0	0	0	0	4	0	0	0	0
OTU_3126	Eukaryota	Alveolata	Dinophyta	Dinophyceae	Dinophyceae_X	Dinophyceae_XX	Dinophyceae_XXX	Dinophyceae_XXX_sp.	0	0	0	0	0	0	0	0	0	0	0	0	0	0	0	0	0	0	0	0	0	0	0	0	0	0	0	0	0	2	0	0	0	0
OTU_3127	Eukaryota	Alveolata	Dinophyta	Dinophyceae	Dinophyceae_X	Dinophyceae_XX	Dinophyceae_XXX	Dinophyceae_XXX_sp.	0	0	0	0	0	0	0	0	0	0	0	0	0	0	0	0	0	0	0	0	0	0	0	0	0	0	0	0	0	2	0	0	0	0
OTU_3128	Eukaryota	Alveolata	Dinophyta	Dinophyceae	Dinophyceae_X	Dinophyceae_XX	Dinophyceae_XXX	Dinophyceae_XXX_sp.	0	0	0	0	0	0	0	0	1	0	0	0	0	0	0	0	0	0	0	0	0	0	0	0	0	0	0	0	0	0	0	0	0	0
OTU_3129	Eukaryota	Alveolata	Dinophyta	Dinophyceae	Dinophyceae_X	Dinophyceae_XX	Dinophyceae_XXX	Dinophyceae_XXX_sp.	0	0	0	0	0	0	0	0	0	0	0	0	0	0	0	0	0	0	0	0	2	0	0	0	0	0	0	0	0	0	0	0	0	0
OTU_3133	Eukaryota	Alveolata	Dinophyta	Dinophyceae	Dinophyceae_X	Dinophyceae_XX	Prorocentrum	Multi-affiliation	0	0	0	0	0	0	0	0	0	2	0	0	0	0	0	0	0	0	0	0	0	0	0	0	0	0	0	0	0	0	0	0	0	0
OTU_3134	Eukaryota	Alveolata	Dinophyta	Dinophyceae	Dinophyceae_X	Dinophyceae_XX	Prorocentrum	Multi-affiliation	0	0	0	0	0	0	0	0	0	2	0	0	0	0	0	0	0	0	0	0	0	0	0	0	0	0	0	0	0	0	0	0	0	0
OTU_3137	Eukaryota	Alveolata	Dinophyta	Dinophyceae	Suessiales	Suessiales_X	Woloszynskia	Woloszynskia_cincta	0	0	0	0	0	0	0	0	0	0	0	0	0	0	0	0	0	0	0	0	0	0	0	0	0	0	0	0	3	0	0	0	0	0
OTU_3138	Eukaryota	Alveolata	Dinophyta	Dinophyceae	Suessiales	Suessiales_X	Woloszynskia	Woloszynskia_cincta	0	0	0	0	0	0	0	0	0	0	0	0	0	0	0	0	0	0	0	0	0	0	0	0	0	0	0	0	0	0	2	0	0	0
OTU_3139	Eukaryota	Alveolata	Dinophyta	Dinophyceae	Suessiales	Suessiales_X	Woloszynskia	Woloszynskia_cincta	0	0	0	0	0	0	0	0	0	0	0	0	0	0	0	0	0	0	0	0	0	0	0	0	0	0	0	0	0	0	2	0	0	0
OTU_3140	Eukaryota	Alveolata	Dinophyta	Dinophyceae	Suessiales	Suessiales_X	Woloszynskia	Woloszynskia_cincta	0	0	0	0	0	0	0	0	0	0	0	0	0	0	0	0	0	0	0	0	0	0	0	0	0	0	0	0	0	0	0	0	1	0
OTU_3141	Eukaryota	Alveolata	Dinophyta	Dinophyceae	Suessiales	Suessiales_X	Woloszynskia	Woloszynskia_cincta	0	0	0	0	0	0	0	0	0	0	0	0	0	0	0	0	0	0	0	0	0	0	0	0	0	0	0	0	0	0	0	0	2	0
OTU_3144	Eukaryota	Alveolata	Dinophyta	Dinophyceae	Suessiales	Suessiales_X	Suessiales_XX	Suessiales_XX_sp.	0	0	0	0	0	0	0	0	0	0	0	0	0	0	0	0	0	0	0	0	0	0	0	0	0	0	0	0	0	0	0	2	0	0
OTU_3145	Eukaryota	Alveolata	Dinophyta	Dinophyceae	Suessiales	Suessiales_X	Suessiales_XX	Suessiales_XX_sp.	0	0	0	0	0	0	0	0	0	0	0	0	0	0	0	0	0	0	0	0	0	0	0	0	0	0	0	0	0	0	0	2	0	0
OTU_3146	Eukaryota	Alveolata	Dinophyta	Dinophyceae	Suessiales	Suessiales_X	Suessiales_XX	Suessiales_XX_sp.	0	0	0	0	0	0	0	0	0	0	0	0	0	0	0	0	0	0	0	0	0	0	0	0	0	0	0	0	0	0	0	0	0	2
OTU_3147	Eukaryota	Alveolata	Dinophyta	Dinophyceae	Suessiales	Suessiales_X	Suessiales_XX	Suessiales_XX_sp.	0	0	0	0	0	0	0	0	0	0	0	2	0	0	0	0	0	0	0	0	0	0	0	0	0	0	0	0	0	0	0	0	0	0
OTU_3148	Eukaryota	Alveolata	Dinophyta	Dinophyceae	Suessiales	Suessiales_X	Suessiales_XX	Suessiales_XX_sp.	0	0	0	0	0	0	0	0	0	0	0	0	0	2	0	0	0	0	0	0	0	0	0	0	0	0	0	0	0	0	0	0	0	0
OTU_3149	Eukaryota	Alveolata	Dinophyta	Dinophyceae	Suessiales	Suessiales_X	Suessiales_XX	Suessiales_XX_sp.	0	3	0	0	0	0	0	0	0	0	0	0	0	0	0	0	0	0	0	0	0	0	0	0	0	0	0	0	0	0	0	2	0	0
OTU_3150	Eukaryota	Alveolata	Dinophyta	Dinophyceae	Suessiales	Suessiales_X	Suessiales_XX	Suessiales_XX_sp.	0	0	0	0	0	0	0	0	0	0	0	0	2	0	0	0	0	0	0	0	0	0	0	0	0	0	0	0	0	0	0	0	0	0
OTU_3151	Eukaryota	Alveolata	Dinophyta	Dinophyceae	Suessiales	Suessiales_X	Suessiales_XX	Suessiales_XX_sp.	0	0	0	0	0	0	0	0	0	0	0	0	0	0	0	0	0	0	0	0	0	0	0	0	0	0	0	0	2	0	0	0	0	0
OTU_3153	Eukaryota	Alveolata	Dinophyta	Dinophyceae	Dinophyceae_X	Dinophyceae_XX	Dinophyceae_XXX	Dinophyceae_XXX_sp.	0	0	0	0	0	0	0	0	0	0	0	0	0	0	0	0	0	0	0	0	2	0	0	0	0	0	0	0	0	0	0	0	0	0
OTU_3154	Eukaryota	Alveolata	Dinophyta	Dinophyceae	Suessiales	Suessiales_X	Suessiales_XX	Suessiales_XX_sp.	0	0	0	0	0	0	0	0	0	0	0	0	0	0	0	0	0	0	0	0	2	0	0	0	0	0	0	0	0	0	0	0	0	0
OTU_3157	Eukaryota	Alveolata	Dinophyta	Dinophyceae	Dinophyceae_X	Dinophyceae_XX	Dinophyceae_XXX	Dinophyceae_XXX_sp.	0	0	0	2	0	0	0	0	0	0	0	0	0	0	0	0	0	0	0	0	0	0	0	0	0	0	0	0	0	0	0	0	0	0
OTU_3158	Eukaryota	Alveolata	Dinophyta	Dinophyceae	Dinophyceae_X	Dinophyceae_XX	Prorocentrum	Multi-affiliation	0	0	0	0	0	0	0	0	0	2	0	0	0	0	0	0	0	0	0	0	0	0	0	0	0	0	0	0	0	0	0	0	0	0
OTU_3159	Eukaryota	Alveolata	Dinophyta	Dinophyceae	Suessiales	Suessiales_X	Woloszynskia	Woloszynskia_cincta	0	0	0	0	0	0	0	0	0	0	0	0	0	0	0	0	0	0	0	0	2	0	0	0	0	0	0	0	0	0	0	0	0	0
OTU_3160	Eukaryota	Alveolata	Dinophyta	Dinophyceae	Suessiales	Suessiales_X	Woloszynskia	Woloszynskia_cincta	0	0	0	0	0	0	0	0	0	0	0	0	0	0	0	0	0	0	0	0	0	0	0	0	0	0	0	0	0	2	0	0	0	0
OTU_3161	Eukaryota	Alveolata	Dinophyta	Dinophyceae	Suessiales	Suessiales_X	Suessiales_XX	Suessiales_XX_sp.	0	0	0	0	0	0	0	0	0	2	0	0	0	0	0	0	0	0	0	0	0	0	0	0	0	0	0	0	0	0	0	0	0	0
OTU_3163	Eukaryota	Alveolata	Dinophyta	Dinophyceae	Suessiales	Suessiales_X	Suessiales_XX	Suessiales_XX_sp.	0	0	0	0	0	0	0	0	2	0	0	0	0	0	0	0	0	0	0	0	0	0	0	0	0	0	0	0	0	0	0	0	0	0
OTU_3164	Eukaryota	Alveolata	Dinophyta	Dinophyceae	Dinophyceae_X	Dinophyceae_XX	Gymnodinium	Gymnodinium_sp.	0	0	0	0	0	0	0	0	0	0	0	0	0	0	0	0	0	0	0	0	0	0	0	0	0	0	0	0	0	2	0	0	0	0
OTU_3165	Eukaryota	Alveolata	Dinophyta	Dinophyceae	Dinophyceae_X	Dinophyceae_XX	Dinophyceae_XXX	Dinophyceae_XXX_sp.	0	0	0	0	0	0	0	0	0	0	0	0	0	0	0	0	0	0	0	0	2	0	0	0	0	0	0	0	0	0	0	0	0	0
OTU_3167	Eukaryota	Alveolata	Dinophyta	Dinophyceae	Suessiales	Suessiales_X	Suessiales_XX	Suessiales_XX_sp.	0	0	0	0	0	0	0	0	0	0	0	0	0	0	0	0	0	0	0	0	0	0	0	0	0	2	0	0	0	0	0	0	0	0
OTU_3169	Eukaryota	Alveolata	Dinophyta	Dinophyceae	Dinophyceae_X	Dinophyceae_XX	Dinophyceae_XXX	Dinophyceae_XXX_sp.	0	0	0	0	0	0	0	0	0	0	0	0	0	0	0	0	0	0	0	0	0	0	0	0	0	0	0	0	0	2	0	0	0	0
OTU_3171	Eukaryota	Alveolata	Dinophyta	Dinophyceae	Suessiales	Suessiales_X	Suessiales_XX	Suessiales_XX_sp.	0	0	0	0	0	0	0	0	2	0	0	0	0	0	0	0	0	0	0	0	0	0	0	0	0	0	0	0	0	0	0	0	0	0
OTU_3174	Eukaryota	Alveolata	Dinophyta	Dinophyceae	Dinophyceae_X	Dinophyceae_XX	Dinophyceae_XXX	Dinophyceae_XXX_sp.	0	0	0	0	0	0	0	0	0	0	0	0	0	0	0	0	0	0	0	0	2	0	0	0	0	0	0	0	0	0	0	0	0	0
OTU_3175	Eukaryota	Alveolata	Dinophyta	Dinophyceae	Suessiales	Suessiales_X	Woloszynskia	Woloszynskia_cincta	0	0	0	0	0	0	0	0	0	0	0	0	0	0	0	0	0	0	0	0	0	0	0	0	0	0	0	0	0	0	0	0	0	3
OTU_3179	Eukaryota	Stramenopiles	Stramenopiles_X	Oomycota	Oomycota_X	Leptomitales	Leptomitales_X	Leptomitales_X_sp.	0	0	0	0	0	0	0	0	0	0	0	0	0	0	0	2	0	0	0	0	0	0	0	0	0	0	0	0	0	0	0	0	0	0
OTU_3184	Eukaryota	Alveolata	Dinophyta	Dinophyceae	Dinophyceae_X	Dinophyceae_XX	Gymnodinium	Gymnodinium_sp.	0	0	2	0	0	0	0	0	0	0	0	0	0	0	0	0	0	0	0	0	0	0	0	0	0	0	0	0	0	0	0	0	0	0
OTU_3186	Eukaryota	Opisthokonta	Fungi	Basidiomycota	Agaricomycotina	Agaricomycetes	Multi-affiliation	Multi-affiliation	0	0	0	0	0	0	0	0	0	0	0	0	0	0	0	0	0	0	0	0	0	0	0	0	0	0	0	0	2	0	0	0	0	0
OTU_3187	Eukaryota	Opisthokonta	Fungi	Basidiomycota	Agaricomycotina	Agaricomycetes	Ganoderma	Ganoderma_tsugae	0	2	0	0	0	0	0	0	0	0	0	0	0	0	0	0	0	0	0	0	0	0	0	0	0	0	0	0	0	0	0	0	0	0
OTU_3189	Eukaryota	Opisthokonta	Fungi	Basidiomycota	Agaricomycotina	Agaricomycetes	Multi-affiliation	Multi-affiliation	0	0	0	0	0	0	0	0	0	0	0	0	0	0	0	0	0	0	0	0	0	0	0	0	0	0	0	0	2	0	0	0	0	0
OTU_3190	Eukaryota	Opisthokonta	Fungi	Basidiomycota	Agaricomycotina	Agaricomycetes	Multi-affiliation	Multi-affiliation	0	0	0	0	0	0	0	0	0	0	0	0	0	0	0	0	0	0	0	0	0	0	0	0	0	0	0	0	2	0	0	0	0	0
OTU_3199	Eukaryota	Alveolata	Dinophyta	Dinophyceae	Dinophyceae_X	Dinophyceae_XX	Gymnodinium	Gymnodinium_dorsalisulcum	0	0	0	0	0	0	0	0	0	0	0	0	0	0	0	0	0	0	0	0	0	0	0	0	0	0	0	0	0	0	0	0	2	0
OTU_3201	Eukaryota	Alveolata	Dinophyta	Dinophyceae	Dinophyceae_X	Dinophyceae_XX	Multi-affiliation	Multi-affiliation	0	0	0	0	0	0	0	0	0	0	0	0	0	0	0	0	0	0	0	0	0	0	0	0	2	0	0	0	0	0	0	0	0	0
OTU_3203	Eukaryota	Alveolata	Dinophyta	Dinophyceae	Dinophyceae_X	Dinophyceae_XX	Dinophyceae_XXX	Dinophyceae_XXX_sp.	0	2	0	0	0	0	0	0	0	0	0	0	0	0	0	0	0	0	0	0	0	0	0	0	0	0	0	0	0	0	0	0	0	0
OTU_3204	Eukaryota	Alveolata	Dinophyta	Dinophyceae	Dinophyceae_X	Dinophyceae_XX	Lepidodinium	Multi-affiliation	0	0	0	0	0	0	0	0	0	2	0	0	0	0	0	0	0	0	0	0	0	0	0	0	0	0	0	0	0	0	0	0	0	0
OTU_3209	Eukaryota	Alveolata	Dinophyta	Dinophyceae	Dinophyceae_X	Dinophyceae_XX	Multi-affiliation	Multi-affiliation	0	0	0	0	0	0	0	0	0	0	0	0	0	0	0	0	0	2	0	0	0	0	0	0	0	0	0	0	0	0	0	0	0	0
OTU_3210	Eukaryota	Alveolata	Dinophyta	Dinophyceae	Dinophyceae_X	Dinophyceae_XX	Multi-affiliation	Multi-affiliation	0	0	0	0	0	0	0	0	0	0	0	0	0	0	0	0	0	0	0	0	0	0	0	0	0	0	2	0	0	0	0	0	0	0
OTU_3211	Eukaryota	Alveolata	Dinophyta	Dinophyceae	Dinophyceae_X	Dinophyceae_XX	Scrippsiella	Scrippsiella_trochoidea	0	0	0	0	0	0	0	0	0	0	0	0	0	0	0	0	0	0	0	0	0	0	2	0	0	0	0	0	0	0	0	0	0	0
OTU_3213	Eukaryota	Alveolata	Dinophyta	Dinophyceae	Dinophyceae_X	Dinophyceae_XX	Prorocentrum	Prorocentrum_micans	0	0	0	0	0	0	0	0	0	0	0	0	0	0	2	0	0	0	0	0	0	0	0	0	0	0	0	0	0	0	0	0	0	0
OTU_3214	Eukaryota	Alveolata	Dinophyta	Dinophyceae	Dinophyceae_X	Dinophyceae_XX	Diplopsalis	Diplopsalis_lenticula	0	0	0	0	0	0	0	0	0	0	0	0	0	0	0	0	0	0	0	0	0	0	2	0	0	0	0	0	0	0	0	0	0	0
OTU_3215	Eukaryota	Alveolata	Dinophyta	Dinophyceae	Dinophyceae_X	Dinophyceae_XX	Prorocentrum	Multi-affiliation	0	0	0	0	0	0	0	0	0	0	0	0	0	0	0	0	0	0	0	0	0	0	0	0	2	0	0	0	0	0	0	0	0	0
OTU_3216	Eukaryota	Alveolata	Dinophyta	Dinophyceae	Dinophyceae_X	Dinophyceae_XX	Prorocentrum	Prorocentrum_micans	0	0	0	0	0	0	0	0	0	0	0	0	0	0	0	0	0	0	0	0	0	0	2	0	0	0	0	0	0	0	0	0	0	0
OTU_3217	Eukaryota	Alveolata	Dinophyta	Dinophyceae	Dinophyceae_X	Dinophyceae_XX	Prorocentrum	Prorocentrum_micans	0	0	0	0	0	0	0	0	0	0	0	0	0	0	2	0	0	0	0	0	0	0	0	0	0	0	0	0	0	0	0	0	0	0
OTU_3218	Eukaryota	Alveolata	Dinophyta	Dinophyceae	Dinophyceae_X	Dinophyceae_XX	Scrippsiella	Scrippsiella_trochoidea	0	0	0	0	2	0	0	0	0	0	0	0	0	0	1	0	0	0	0	0	0	0	0	0	0	0	0	0	0	0	0	0	0	0
OTU_3219	Eukaryota	Alveolata	Dinophyta	Dinophyceae	Dinophyceae_X	Pfiesteriaceae	Stoeckeria	Stoeckeria_sp.	0	0	0	2	0	0	0	0	0	0	0	0	0	0	0	0	0	0	0	0	0	0	0	0	0	0	0	0	0	0	0	0	0	0
OTU_3222	Eukaryota	Alveolata	Dinophyta	Dinophyceae	Dinophyceae_X	Pfiesteriaceae	Stoeckeria	Stoeckeria_sp.	0	0	0	0	0	0	0	0	0	0	0	0	0	0	0	2	0	0	0	0	0	0	0	0	0	0	0	0	0	0	0	0	0	0
OTU_3225	Eukaryota	Alveolata	Dinophyta	Dinophyceae	Dinophyceae_X	Pfiesteriaceae	Pfiesteriaceae_X	Pfiesteriaceae_X_sp.	0	1	0	0	0	0	0	0	0	0	0	0	0	0	0	0	0	0	0	0	0	0	0	0	0	0	0	0	1	0	0	0	0	0
OTU_3226	Eukaryota	Alveolata	Dinophyta	Dinophyceae	Dinophyceae_X	Pfiesteriaceae	Pfiesteriaceae_X	Pfiesteriaceae_X_sp.	0	0	0	0	0	0	0	0	0	0	0	0	0	0	0	0	0	0	0	0	0	0	0	0	0	0	0	0	0	0	0	0	0	2
OTU_3229	Eukaryota	Alveolata	Dinophyta	Dinophyceae	Dinophyceae_X	Pfiesteriaceae	Pfiesteriaceae_X	Pfiesteriaceae_X_sp.	0	0	2	0	0	0	0	0	0	0	0	0	0	0	0	0	0	0	0	0	0	0	0	0	0	0	0	0	0	0	0	0	0	0
OTU_3230	Eukaryota	Alveolata	Dinophyta	Dinophyceae	Dinophyceae_X	Pfiesteriaceae	Pfiesteriaceae_X	Pfiesteriaceae_X_sp.	0	0	0	0	0	0	0	0	0	0	0	0	0	0	0	0	0	0	0	0	0	0	0	0	0	0	0	0	0	0	0	0	0	2
OTU_3232	Eukaryota	Alveolata	Dinophyta	Dinophyceae	Dinophyceae_X	Dinophyceae_XX	Gymnodinium	Gymnodinium_dorsalisulcum	0	0	0	0	0	0	0	0	0	0	0	0	0	0	0	0	0	0	0	0	2	0	0	0	0	0	0	0	0	0	0	0	0	0
OTU_3233	Eukaryota	Alveolata	Dinophyta	Dinophyceae	Dinophyceae_X	Dinophyceae_XX	Multi-affiliation	Multi-affiliation	0	2	0	0	0	0	0	0	0	0	0	0	0	0	0	0	0	0	0	0	0	0	0	0	0	0	0	0	0	0	0	0	0	0
OTU_3236	Eukaryota	Alveolata	Dinophyta	Dinophyceae	Dinophyceae_X	Pfiesteriaceae	Pfiesteriaceae_X	Pfiesteriaceae_X_sp.	0	0	0	0	0	0	0	0	0	0	0	0	0	0	0	0	0	0	0	0	0	0	0	0	0	0	0	0	0	0	2	0	0	0
OTU_3237	Eukaryota	Alveolata	Dinophyta	Dinophyceae	Dinophyceae_X	Pfiesteriaceae	Pfiesteriaceae_X	Pfiesteriaceae_X_sp.	0	0	0	0	0	0	0	0	0	0	0	0	0	0	0	0	0	0	0	0	0	0	0	0	0	0	0	0	0	0	0	0	0	2
OTU_3239	Eukaryota	Alveolata	Dinophyta	Dinophyceae	Dinophyceae_X	Dinophyceae_XX	Multi-affiliation	Multi-affiliation	0	0	0	0	0	0	0	0	0	0	0	0	0	0	0	0	2	0	0	0	0	0	0	0	0	0	0	0	0	0	0	0	0	0
OTU_3240	Eukaryota	Alveolata	Dinophyta	Dinophyceae	Dinophyceae_X	Dinophyceae_XX	Multi-affiliation	Multi-affiliation	0	0	0	0	0	0	0	0	0	0	0	0	0	0	0	0	0	0	0	0	0	0	0	0	0	0	2	0	0	0	0	0	0	0
OTU_3241	Eukaryota	Alveolata	Dinophyta	Dinophyceae	Dinophyceae_X	Dinophyceae_XX	Prorocentrum	Prorocentrum_micans	0	0	0	0	0	0	0	0	0	0	0	0	0	0	0	0	0	0	0	0	0	0	2	0	0	0	0	0	0	0	0	0	0	0
OTU_3242	Eukaryota	Alveolata	Dinophyta	Dinophyceae	Dinophyceae_X	Pfiesteriaceae	Pfiesteriaceae_X	Pfiesteriaceae_X_sp.	0	0	0	0	0	0	0	0	0	0	0	0	2	0	0	0	0	0	0	0	0	0	0	0	0	0	0	0	0	0	0	0	0	0
OTU_3245	Eukaryota	Alveolata	Dinophyta	Dinophyceae	Dinophyceae_X	Dinophyceae_XX	Multi-affiliation	Multi-affiliation	0	0	0	0	0	0	0	0	0	0	0	0	0	0	0	0	0	2	0	0	0	0	0	0	0	0	0	0	0	0	0	0	0	0
OTU_3246	Eukaryota	Alveolata	Dinophyta	Dinophyceae	Dinophyceae_X	Dinophyceae_XX	Dinophyceae_XXX	Dinophyceae_XXX_sp.	0	0	0	0	0	0	0	0	0	0	0	0	0	0	2	0	0	0	0	0	0	0	0	0	0	0	0	0	0	0	0	0	0	0
OTU_3248	Eukaryota	Alveolata	Dinophyta	Dinophyceae	Dinophyceae_X	Pfiesteriaceae	Pfiesteriaceae_X	Pfiesteriaceae_X_sp.	0	0	0	0	0	0	0	0	0	0	0	0	0	0	0	0	0	0	0	0	0	0	0	0	0	0	0	0	0	0	0	0	0	2
OTU_3250	Eukaryota	Alveolata	Dinophyta	Dinophyceae	Dinophyceae_X	Pfiesteriaceae	Stoeckeria	Stoeckeria_algicida	0	0	0	0	0	0	0	0	0	0	0	0	0	0	0	0	0	0	0	0	0	0	0	0	0	0	0	0	3	0	0	0	0	0
OTU_3251	Eukaryota	Stramenopiles	Stramenopiles_X	Bicoecea	Borokales	Borokaceae	Borokaceae_X	Borokaceae_X_sp.	0	2	0	0	0	0	0	0	0	0	0	0	0	0	0	0	0	0	0	0	0	0	0	0	0	0	0	0	0	0	0	0	0	0
OTU_3254	Eukaryota	Alveolata	Dinophyta	Dinophyceae	Dinophyceae_X	Dinophyceae_XX	Alexandrium	Multi-affiliation	0	0	0	0	0	0	0	0	0	0	0	0	0	0	2	0	0	0	0	0	0	0	0	0	0	0	0	0	0	0	0	0	0	0
OTU_3257	Eukaryota	Opisthokonta	Fungi	Basidiomycota	Pucciniomycotina	Multi-affiliation	Multi-affiliation	Multi-affiliation	2	0	0	0	0	0	0	0	0	0	0	0	0	0	0	0	0	0	0	0	0	0	0	0	0	0	0	0	0	0	0	0	0	0
OTU_3258	Eukaryota	Alveolata	Dinophyta	Dinophyceae	Dinophyceae_X	Dinophyceae_XX	Alexandrium	Multi-affiliation	0	0	0	0	0	0	0	0	0	0	0	0	0	0	2	0	0	0	0	0	0	0	0	0	0	0	0	0	0	0	0	0	0	0
OTU_3262	Eukaryota	Alveolata	Dinophyta	Dinophyceae	Dinophyceae_X	Dinophyceae_XX	Alexandrium	Multi-affiliation	0	0	0	0	0	0	0	0	0	0	0	0	0	0	2	0	0	0	0	0	0	0	0	0	0	0	0	0	0	0	0	0	0	0
OTU_3265	Eukaryota	Alveolata	Dinophyta	Dinophyceae	Dinophyceae_X	Dinophyceae_XX	Dinophyceae_XXX	Dinophyceae_XXX_sp.	0	0	2	0	0	0	0	0	0	0	0	0	0	0	0	0	0	0	0	0	0	0	0	0	0	0	0	0	0	0	0	0	0	0
OTU_3283	Eukaryota	Alveolata	Apicomplexa	Apicomplexa_X	Gregarines	Gregarines_X	Gregarines_XX	Gregarines_XX_sp.	0	0	0	0	0	0	0	0	0	0	0	0	0	0	0	0	0	4	0	0	0	0	0	0	0	0	0	0	0	0	0	0	0	0
OTU_3286	Eukaryota	Alveolata	Dinophyta	Syndiniales	Dino-Group-II	Dino-Group-II-Clade-7	Dino-Group-II-Clade-7_X	Dino-Group-II-Clade-7_X_sp.	0	0	0	0	0	0	0	0	0	0	0	0	0	0	0	0	0	0	0	0	0	0	0	0	0	0	0	1	1	0	0	0	0	0
OTU_3353	Eukaryota	Stramenopiles	Ochrophyta	Bacillariophyta	Bacillariophyta_X	Polar-centric-Mediophyceae	Multi-affiliation	Multi-affiliation	0	0	0	0	0	0	0	0	0	0	0	0	0	0	0	0	0	0	0	0	0	0	0	0	0	0	2	0	0	0	0	0	0	0
OTU_3357	Eukaryota	Alveolata	Dinophyta	Dinophyceae	Suessiales	Suessiales_X	Multi-affiliation	Multi-affiliation	0	0	0	0	0	0	0	0	0	0	0	0	0	0	0	0	0	0	0	0	0	0	0	0	0	0	2	0	0	0	0	0	0	0
OTU_3359	Eukaryota	Alveolata	Dinophyta	Dinophyceae	Suessiales	Suessiales_X	Multi-affiliation	Multi-affiliation	0	0	0	0	0	0	0	0	0	0	0	0	0	0	0	0	0	0	0	0	0	0	0	0	0	0	0	0	0	0	0	2	0	0
OTU_3360	Eukaryota	Alveolata	Dinophyta	Dinophyceae	Suessiales	Suessiales_X	Multi-affiliation	Multi-affiliation	0	0	0	0	0	0	0	0	0	0	0	0	0	2	0	0	0	0	0	0	0	0	0	0	0	0	0	0	0	0	0	0	0	0
OTU_3361	Eukaryota	Alveolata	Dinophyta	Dinophyceae	Suessiales	Suessiales_X	Multi-affiliation	Multi-affiliation	0	0	0	0	0	0	0	0	0	0	0	0	0	0	0	0	0	0	0	0	0	0	0	0	0	2	0	0	0	0	0	0	0	0
OTU_3363	Eukaryota	Alveolata	Dinophyta	Dinophyceae	Dinophyceae_X	Dinophyceae_XX	Protoperidinium	Protoperidinium_thulesense	0	0	0	0	0	0	0	0	0	0	0	0	0	0	2	0	0	0	0	0	0	0	0	0	0	0	0	0	0	0	0	0	0	0
OTU_3367	Eukaryota	Amoebozoa	Conosa	Variosea	Variosea_X	Variosea_XX	Variosea_XXX	Variosea_XXX_sp.	0	0	0	0	0	0	0	0	0	0	0	0	0	0	0	0	0	0	0	0	0	0	0	3	0	0	0	0	0	0	0	0	0	0
OTU_3370	Eukaryota	Rhizaria	Cercozoa	Filosa-Thecofilosea	Cryomonadida	Protaspa-lineage	Protaspa	Protaspa_longipes	0	0	0	0	0	0	0	0	0	0	0	0	0	0	0	2	0	0	0	0	0	0	0	0	0	0	0	0	0	0	0	0	0	0
OTU_3371	Eukaryota	Rhizaria	Cercozoa	Filosa-Thecofilosea	Cryomonadida	Protaspa-lineage	Protaspa	Protaspa_longipes	0	0	0	0	2	0	0	0	0	0	0	0	0	0	0	0	0	0	0	0	0	0	0	0	0	0	0	0	0	0	0	0	0	0
OTU_3374	Eukaryota	Rhizaria	Cercozoa	Filosa-Thecofilosea	Cryomonadida	Protaspa-lineage	Protaspa	Multi-affiliation	0	0	0	0	0	0	0	0	0	0	0	0	0	0	0	0	2	0	0	0	0	0	0	0	0	0	0	0	0	0	0	0	0	0
OTU_3377	Eukaryota	Alveolata	Dinophyta	Dinophyceae	Dinophyceae_X	Dinophyceae_XX	Dinophyceae_XXX	Dinophyceae_XXX_sp.	0	0	0	0	0	0	0	0	0	0	0	0	1	0	0	0	0	0	0	0	0	0	0	0	0	0	0	0	0	0	0	2	0	0
OTU_3388	Eukaryota	Amoebozoa	Lobosa	Discosea-Flabellinia	Dactylopodida	Paramoebidae	Neoparamoeba	Neoparamoeba_pemaquidensis	0	0	0	0	0	0	0	0	0	0	0	0	0	0	0	0	0	0	0	0	0	2	0	0	0	0	0	0	0	0	0	0	0	0
OTU_3389	Eukaryota	Amoebozoa	Lobosa	Discosea-Flabellinia	Dactylopodida	Paramoebidae	Neoparamoeba	Neoparamoeba_pemaquidensis	0	0	0	0	0	0	0	0	0	0	0	0	0	0	0	0	0	0	0	0	0	2	0	0	0	0	0	0	0	0	0	0	0	0
OTU_3390	Eukaryota	Amoebozoa	Lobosa	Discosea-Flabellinia	Dactylopodida	Paramoebidae	Neoparamoeba	Neoparamoeba_pemaquidensis	0	0	0	0	0	0	0	0	0	0	0	0	0	0	0	0	0	0	0	0	2	0	0	0	0	0	0	0	0	0	0	0	0	0
OTU_3391	Eukaryota	Amoebozoa	Lobosa	Discosea-Flabellinia	Dactylopodida	Paramoebidae	Neoparamoeba	Neoparamoeba_pemaquidensis	0	0	0	0	0	0	0	0	0	0	0	0	0	0	0	0	0	0	0	0	2	0	0	0	0	0	0	0	0	0	0	0	0	0
OTU_3392	Eukaryota	Amoebozoa	Lobosa	Discosea-Flabellinia	Dactylopodida	Paramoebidae	Neoparamoeba	Neoparamoeba_pemaquidensis	0	0	0	0	0	0	0	0	0	0	0	0	0	0	0	0	0	0	0	0	0	2	0	0	0	0	0	0	0	0	0	0	0	0
OTU_3393	Eukaryota	Amoebozoa	Lobosa	Discosea-Flabellinia	Dactylopodida	Paramoebidae	Neoparamoeba	Neoparamoeba_pemaquidensis	0	0	0	0	0	0	0	0	0	0	0	0	0	0	0	0	0	0	0	0	0	2	0	0	0	0	0	0	0	0	0	0	0	0
OTU_3394	Eukaryota	Amoebozoa	Lobosa	Discosea-Flabellinia	Dactylopodida	Paramoebidae	Neoparamoeba	Neoparamoeba_pemaquidensis	0	0	0	0	0	0	0	0	0	0	0	0	0	0	0	0	0	0	0	0	0	2	0	0	0	0	0	0	0	0	0	0	0	0
OTU_3395	Eukaryota	Amoebozoa	Lobosa	Discosea-Flabellinia	Dactylopodida	Paramoebidae	Neoparamoeba	Neoparamoeba_pemaquidensis	0	0	0	0	0	0	0	0	0	0	0	0	0	0	0	0	0	0	0	0	0	4	0	0	0	0	0	0	0	0	0	0	0	0
OTU_3396	Eukaryota	Amoebozoa	Lobosa	Discosea-Flabellinia	Dactylopodida	Paramoebidae	Neoparamoeba	Neoparamoeba_pemaquidensis	0	0	0	0	0	0	0	0	0	0	0	0	0	0	0	0	0	0	0	0	0	2	0	0	0	0	0	0	0	0	0	0	0	0
OTU_3397	Eukaryota	Amoebozoa	Lobosa	Discosea-Flabellinia	Dactylopodida	Paramoebidae	Neoparamoeba	Neoparamoeba_pemaquidensis	0	0	0	0	0	0	0	0	0	0	0	0	0	0	0	0	0	0	0	0	0	5	0	0	0	0	0	0	0	0	0	0	0	0
OTU_3398	Eukaryota	Amoebozoa	Lobosa	Discosea-Flabellinia	Dactylopodida	Paramoebidae	Neoparamoeba	Neoparamoeba_pemaquidensis	0	0	0	0	0	0	0	0	0	0	0	0	0	0	0	0	0	0	0	0	0	2	0	0	0	0	0	0	0	0	0	0	0	0
OTU_3399	Eukaryota	Amoebozoa	Lobosa	Discosea-Flabellinia	Dactylopodida	Paramoebidae	Neoparamoeba	Neoparamoeba_pemaquidensis	0	0	0	0	0	0	0	0	0	0	0	0	0	0	0	0	0	0	0	0	0	3	0	0	0	0	0	0	0	0	0	0	0	0
OTU_3400	Eukaryota	Amoebozoa	Lobosa	Discosea-Flabellinia	Dactylopodida	Paramoebidae	Neoparamoeba	Neoparamoeba_pemaquidensis	0	0	0	0	0	0	0	0	0	0	0	0	0	0	0	0	0	0	0	0	2	0	0	0	0	0	0	0	0	0	0	0	0	0
OTU_3401	Eukaryota	Amoebozoa	Lobosa	Discosea-Flabellinia	Dactylopodida	Paramoebidae	Neoparamoeba	Neoparamoeba_pemaquidensis	0	0	0	0	0	0	0	0	0	0	0	0	0	0	0	0	0	0	0	0	0	2	0	0	0	0	0	0	0	0	0	0	0	0
OTU_3402	Eukaryota	Amoebozoa	Lobosa	Discosea-Flabellinia	Dactylopodida	Paramoebidae	Neoparamoeba	Neoparamoeba_pemaquidensis	0	0	0	0	0	0	0	0	0	0	0	0	0	0	0	0	0	0	0	0	2	1	0	0	0	0	0	0	0	0	0	0	0	0
OTU_3404	Eukaryota	Amoebozoa	Lobosa	Discosea-Flabellinia	Dactylopodida	Paramoebidae	Paramoeba	Paramoeba_atlantica	0	0	0	0	0	0	0	0	0	0	0	0	0	0	0	0	0	0	0	0	0	0	0	2	0	0	0	0	0	0	0	0	0	0
OTU_3406	Eukaryota	Stramenopiles	Ochrophyta	Bacillariophyta	Bacillariophyta_X	Polar-centric-Mediophyceae	Stephanodiscus	Stephanodiscus_hantzschii	0	0	0	0	0	0	0	0	0	0	0	0	0	0	2	0	0	0	0	0	0	0	0	0	0	0	0	0	0	0	0	0	0	0
OTU_3410	Eukaryota	Apusozoa	Apusomonadidae	Apusomonadidae_Group-2	Apusomonadidae_Group-2B	Apusomonadidae_Group-2B_X	Apusomonadidae_Group-2B_XX	Apusomonadidae_Group-2B_XX_sp.	0	0	0	0	0	0	0	0	0	0	0	0	0	0	0	0	0	2	0	0	0	0	0	0	0	0	0	0	0	0	0	0	0	0
OTU_3412	Eukaryota	Excavata	Discoba	Euglenozoa	Euglenida	Petalomonadales	Petalomonadales_X	Petalomonadales_X_sp.	2	0	0	0	0	0	0	0	0	0	0	0	0	0	0	0	0	0	0	0	0	0	0	0	0	0	0	0	0	0	0	0	0	0
OTU_3515	Eukaryota	Multi-affiliation	Multi-affiliation	Multi-affiliation	Multi-affiliation	Multi-affiliation	Multi-affiliation	Multi-affiliation	0	0	0	0	0	0	0	0	0	0	0	0	0	0	0	0	0	0	0	0	0	0	0	2	0	0	0	0	0	0	0	0	0	0
OTU_4197	Eukaryota	Alveolata	Ciliophora	Phyllopharyngea	Cyrtophoria	Dysteriidae	Dysteriidae_X	Dysteriidae_X_sp.	0	0	0	0	0	0	0	0	0	0	0	0	0	0	0	0	2	0	0	0	0	0	0	0	0	0	0	0	0	0	0	0	0	0
OTU_4344	Eukaryota	Alveolata	Ciliophora	Phyllopharyngea	Suctoria	Acinetidae	Acineta	Multi-affiliation	0	0	0	0	0	0	0	0	0	0	0	0	0	0	0	0	0	0	0	0	0	0	4	0	0	0	0	0	0	0	0	0	0	0
OTU_4351	Eukaryota	Alveolata	Ciliophora	Phyllopharyngea	Suctoria	Acinetidae	Acineta	Multi-affiliation	0	0	0	0	0	0	0	0	0	0	0	0	0	0	0	0	0	0	0	0	0	0	2	0	0	0	0	0	0	0	0	0	0	0
OTU_4390	Eukaryota	Alveolata	Ciliophora	Phyllopharyngea	Suctoria	Acinetidae	Acineta	Acineta_compressa	0	0	0	0	0	0	0	0	0	0	0	0	0	0	0	0	0	0	0	0	0	0	1	0	0	0	0	0	0	0	0	0	0	0
OTU_4432	Eukaryota	Alveolata	Ciliophora	Phyllopharyngea	Suctoria	Acinetidae	Acineta	Acineta_sp.	0	0	0	0	0	0	0	0	0	0	0	0	0	0	0	0	0	0	0	0	0	0	0	0	0	0	0	0	0	0	0	0	0	1
OTU_4852	Eukaryota	Alveolata	Ciliophora	Phyllopharyngea	Suctoria	Acinetidae	Acineta	Acineta_tuberosa	0	0	0	0	0	0	0	0	0	0	0	0	0	0	0	0	0	0	0	0	0	0	2	0	0	0	0	0	0	0	0	0	0	0
OTU_4882	Eukaryota	Alveolata	Ciliophora	Phyllopharyngea	Suctoria	Acinetidae	Acineta	Multi-affiliation	0	0	0	0	0	0	0	0	0	0	0	0	0	0	0	0	0	0	0	0	0	0	1	0	0	0	0	0	0	0	0	0	0	0
OTU_5434	Eukaryota	Alveolata	Ciliophora	Oligohymenophorea	Mobilida	Trichodinidae	Trichodina	Trichodina_sinonovaculae	0	0	0	0	0	0	0	0	0	0	0	0	0	0	0	0	0	0	0	0	0	0	0	0	0	2	0	0	0	0	0	0	0	0
OTU_5570	Eukaryota	Alveolata	Ciliophora	Oligohymenophorea	Mobilida	Trichodinidae	Trichodina	Trichodina_sinonovaculae	0	0	0	0	0	0	0	0	0	0	0	1	0	0	0	0	0	0	0	0	0	0	0	0	0	0	0	0	0	0	0	0	0	0
OTU_5849	Eukaryota	Alveolata	Ciliophora	Oligohymenophorea	Mobilida	Trichodinidae	Trichodina	Trichodina_ruditapicis	0	0	0	0	0	0	0	0	0	0	0	0	0	0	0	1	0	0	0	0	0	0	0	0	0	0	0	0	0	0	0	0	0	0
OTU_5982	Eukaryota	Alveolata	Ciliophora	Oligohymenophorea	Mobilida	Trichodinidae	Trichodina	Trichodina_ruditapicis	0	0	0	0	0	0	0	0	0	0	0	1	0	0	0	0	0	0	0	0	0	0	0	0	0	0	0	0	0	0	0	0	0	1
OTU_6081	Eukaryota	Alveolata	Ciliophora	Oligohymenophorea	Mobilida	Trichodinidae	Trichodina	Trichodina_ruditapicis	0	0	1	0	0	0	0	0	0	0	0	0	0	1	0	0	0	0	0	0	0	0	0	0	0	0	0	0	0	0	0	0	0	0
OTU_6185	Eukaryota	Alveolata	Ciliophora	Oligohymenophorea	Mobilida	Trichodinidae	Trichodina	Trichodina_ruditapicis	0	0	0	0	0	0	1	0	0	0	0	1	1	0	0	0	0	0	0	0	0	0	0	0	0	0	0	0	0	0	0	0	0	0
OTU_6307	Eukaryota	Alveolata	Ciliophora	Oligohymenophorea	Mobilida	Trichodinidae	Trichodina	Trichodina_sinonovaculae	0	0	1	0	0	0	0	0	0	0	0	0	0	0	0	0	0	0	0	0	0	0	0	0	1	0	0	0	0	0	0	0	0	0
OTU_6407	Eukaryota	Alveolata	Ciliophora	Oligohymenophorea	Mobilida	Trichodinidae	Trichodina	Trichodina_sinonovaculae	0	0	0	0	0	0	0	0	0	0	0	0	1	1	0	0	0	0	0	0	0	0	0	0	0	0	0	0	0	0	0	0	0	0
OTU_6408	Eukaryota	Alveolata	Ciliophora	Oligohymenophorea	Mobilida	Trichodinidae	Trichodina	Trichodina_sinonovaculae	0	0	0	0	0	0	0	0	0	0	0	0	0	2	0	0	0	0	0	0	0	0	0	0	0	0	0	0	0	0	0	0	0	0
OTU_6560	Eukaryota	Alveolata	Ciliophora	Oligohymenophorea	Mobilida	Trichodinidae	Trichodina	Trichodina_ruditapicis	0	0	0	0	0	0	0	0	0	0	0	1	0	1	0	0	0	0	0	0	0	0	0	0	0	0	0	0	0	0	0	0	0	0
OTU_6571	Eukaryota	Alveolata	Ciliophora	Oligohymenophorea	Mobilida	Trichodinidae	Trichodina	Trichodina_sinonovaculae	0	0	0	0	0	0	0	0	0	0	0	0	0	0	0	0	0	0	0	0	0	0	0	0	0	0	0	0	0	0	0	0	0	2
OTU_6575	Eukaryota	Alveolata	Ciliophora	Oligohymenophorea	Mobilida	Trichodinidae	Trichodina	Trichodina_sinonovaculae	0	0	0	0	0	0	0	0	0	0	0	0	0	0	0	1	0	0	0	0	0	0	0	0	0	0	0	0	0	0	0	0	0	0
OTU_6590	Eukaryota	Alveolata	Ciliophora	Oligohymenophorea	Mobilida	Trichodinidae	Trichodina	Trichodina_sinonovaculae	0	0	0	0	0	0	0	0	0	0	0	0	0	2	0	0	0	0	0	0	0	0	0	0	0	0	0	0	0	0	0	0	0	0
OTU_6601	Eukaryota	Alveolata	Ciliophora	Oligohymenophorea	Mobilida	Trichodinidae	Trichodina	Trichodina_sinonovaculae	0	0	0	0	0	0	0	0	0	0	0	0	0	1	0	0	0	0	0	0	0	0	0	0	0	0	0	0	0	0	0	0	0	0
OTU_6716	Eukaryota	Alveolata	Ciliophora	Oligohymenophorea	Mobilida	Trichodinidae	Trichodina	Trichodina_sinonovaculae	0	0	0	0	0	0	0	0	0	0	0	0	0	1	0	0	0	0	0	0	0	0	0	0	0	0	0	0	0	0	0	0	0	1
OTU_6740	Eukaryota	Alveolata	Ciliophora	Oligohymenophorea	Mobilida	Trichodinidae	Trichodina	Trichodina_sinonovaculae	0	0	0	0	0	0	0	0	0	0	0	1	0	1	0	0	0	0	0	0	0	0	0	0	1	0	0	0	0	0	0	0	0	0
OTU_6815	Eukaryota	Alveolata	Ciliophora	Oligohymenophorea	Mobilida	Trichodinidae	Trichodina	Trichodina_sinonovaculae	1	0	0	0	0	0	0	0	0	0	0	0	0	0	0	0	0	0	0	0	0	0	0	0	1	0	0	0	0	0	0	0	0	0
OTU_6843	Eukaryota	Alveolata	Ciliophora	Oligohymenophorea	Mobilida	Trichodinidae	Trichodina	Trichodina_sinonovaculae	0	0	1	0	0	0	0	0	0	0	0	1	0	0	0	0	0	0	0	0	0	0	0	0	0	0	0	0	0	0	0	0	0	0
OTU_6864	Eukaryota	Alveolata	Ciliophora	Oligohymenophorea	Mobilida	Trichodinidae	Trichodina	Trichodina_sinonovaculae	0	0	0	0	0	0	0	0	0	0	0	1	0	0	0	0	0	0	0	0	0	0	0	0	1	0	0	0	0	0	0	0	0	0
OTU_6894	Eukaryota	Alveolata	Ciliophora	Oligohymenophorea	Mobilida	Trichodinidae	Trichodina	Trichodina_sinonovaculae	0	0	1	0	0	0	0	0	0	0	0	0	0	1	0	0	0	0	0	0	0	0	0	0	0	0	0	0	0	0	0	0	0	0
OTU_6896	Eukaryota	Alveolata	Ciliophora	Oligohymenophorea	Mobilida	Trichodinidae	Trichodina	Multi-affiliation	0	0	2	0	0	0	0	0	0	0	0	0	0	1	0	0	0	0	0	0	0	0	0	0	0	0	0	0	0	0	0	0	0	0
OTU_6899	Eukaryota	Alveolata	Ciliophora	Oligohymenophorea	Mobilida	Trichodinidae	Trichodina	Trichodina_sinonovaculae	0	0	1	0	0	0	0	0	0	0	0	0	0	1	0	0	0	0	0	0	0	0	0	0	0	0	0	0	0	0	0	0	0	0
OTU_6901	Eukaryota	Alveolata	Ciliophora	Oligohymenophorea	Mobilida	Trichodinidae	Trichodina	Trichodina_sinonovaculae	0	0	2	0	0	0	0	0	0	0	0	0	0	0	0	0	0	0	0	0	0	0	0	0	0	0	0	0	0	0	0	0	0	1
OTU_7001	Eukaryota	Alveolata	Ciliophora	Oligohymenophorea	Mobilida	Trichodinidae	Trichodina	Trichodina_sinonovaculae	1	0	0	0	0	0	0	0	0	0	0	0	0	1	0	0	0	0	0	0	0	0	0	0	0	0	0	0	0	0	0	0	0	0
OTU_7031	Eukaryota	Alveolata	Ciliophora	Oligohymenophorea	Mobilida	Trichodinidae	Trichodina	Trichodina_ruditapicis	0	0	0	0	0	0	0	0	0	0	0	1	0	0	0	1	0	0	0	0	0	0	0	0	0	0	0	0	0	0	0	0	0	0
OTU_7034	Eukaryota	Alveolata	Ciliophora	Oligohymenophorea	Mobilida	Trichodinidae	Trichodina	Trichodina_sinonovaculae	0	0	0	0	0	0	0	0	0	0	0	0	0	1	0	0	0	0	0	0	0	0	0	0	1	0	0	0	0	0	0	0	0	0
OTU_7039	Eukaryota	Alveolata	Ciliophora	Oligohymenophorea	Mobilida	Trichodinidae	Trichodina	Trichodina_sinonovaculae	1	0	0	0	0	0	0	0	0	0	0	0	1	0	0	0	0	0	0	0	0	0	0	0	0	0	0	0	0	0	0	0	0	0
OTU_7050	Eukaryota	Alveolata	Ciliophora	Oligohymenophorea	Mobilida	Trichodinidae	Trichodina	Trichodina_sinonovaculae	0	0	1	0	0	0	0	0	0	0	1	1	0	0	0	0	0	0	0	0	0	0	0	0	1	0	0	0	0	0	0	0	0	0
OTU_7057	Eukaryota	Alveolata	Ciliophora	Oligohymenophorea	Mobilida	Trichodinidae	Trichodina	Trichodina_sinonovaculae	0	0	0	0	0	0	0	0	0	0	0	1	1	2	0	0	0	0	0	0	0	0	0	0	0	0	0	0	0	0	0	0	0	1
OTU_7071	Eukaryota	Alveolata	Ciliophora	Oligohymenophorea	Mobilida	Trichodinidae	Trichodina	Trichodina_sinonovaculae	0	0	0	0	0	0	0	0	0	0	0	1	0	0	0	0	0	0	0	0	0	0	0	0	0	0	0	0	0	0	0	0	0	1
OTU_7090	Eukaryota	Alveolata	Ciliophora	Oligohymenophorea	Mobilida	Trichodinidae	Trichodina	Trichodina_ruditapicis	0	0	1	0	0	0	0	0	0	0	0	0	0	0	0	1	0	0	0	0	0	0	0	0	0	0	0	0	0	0	0	0	0	0
OTU_7095	Eukaryota	Alveolata	Ciliophora	Oligohymenophorea	Mobilida	Trichodinidae	Trichodina	Trichodina_sinonovaculae	0	0	0	0	0	0	0	0	0	0	0	0	0	1	0	1	0	0	0	0	0	0	0	0	0	0	0	0	0	0	0	0	0	0
OTU_7096	Eukaryota	Alveolata	Ciliophora	Oligohymenophorea	Mobilida	Trichodinidae	Trichodina	Trichodina_ruditapicis	1	0	0	0	0	0	0	0	0	0	0	0	0	1	0	0	0	0	0	0	0	0	0	0	0	0	0	0	0	0	0	0	0	0
OTU_7201	Eukaryota	Alveolata	Ciliophora	Oligohymenophorea	Mobilida	Trichodinidae	Trichodina	Trichodina_sinonovaculae	0	0	1	0	0	0	0	0	0	0	0	0	0	0	0	1	0	0	0	0	0	0	0	0	0	0	0	0	0	0	0	0	0	0
OTU_7209	Eukaryota	Alveolata	Ciliophora	Oligohymenophorea	Mobilida	Trichodinidae	Trichodina	Trichodina_ruditapicis	0	0	1	0	0	0	0	0	0	0	0	0	0	1	0	0	0	0	0	0	0	0	0	0	0	0	0	0	0	0	0	0	0	2
OTU_7229	Eukaryota	Alveolata	Ciliophora	Oligohymenophorea	Mobilida	Trichodinidae	Trichodina	Trichodina_sinonovaculae	0	0	2	0	0	0	0	0	0	0	0	0	0	0	0	0	0	0	0	0	0	0	0	0	0	0	0	0	0	0	0	0	0	0
OTU_7245	Eukaryota	Alveolata	Ciliophora	Oligohymenophorea	Mobilida	Trichodinidae	Trichodina	Trichodina_sinonovaculae	0	0	1	0	0	0	0	0	0	0	0	0	1	0	0	0	0	0	0	0	0	0	0	0	0	0	0	0	0	0	0	0	0	0
OTU_7274	Eukaryota	Alveolata	Ciliophora	Oligohymenophorea	Mobilida	Trichodinidae	Trichodina	Trichodina_sinonovaculae	0	0	0	0	0	0	0	0	0	0	0	0	0	1	0	0	0	0	0	0	0	0	0	0	0	0	0	0	0	0	0	0	0	1
OTU_7401	Eukaryota	Alveolata	Ciliophora	Oligohymenophorea	Mobilida	Trichodinidae	Trichodina	Trichodina_sinonovaculae	0	0	0	0	0	0	0	0	0	0	0	0	0	0	0	2	0	0	0	0	0	0	0	0	0	0	0	0	0	0	0	0	0	0
OTU_7770	Eukaryota	Alveolata	Ciliophora	Oligohymenophorea	Mobilida	Trichodinidae	Trichodina	Trichodina_ruditapicis	0	0	0	0	0	0	0	0	0	0	0	0	1	0	0	0	0	0	0	0	0	0	0	0	0	0	0	0	0	0	0	0	0	1
OTU_7898	Eukaryota	Alveolata	Ciliophora	Oligohymenophorea	Mobilida	Trichodinidae	Trichodina	Trichodina_sinonovaculae	0	0	1	0	0	0	0	0	0	0	0	0	1	0	0	0	0	0	0	0	0	0	0	0	0	0	0	0	0	0	0	0	0	0
OTU_7902	Eukaryota	Alveolata	Ciliophora	Oligohymenophorea	Mobilida	Trichodinidae	Trichodina	Trichodina_ruditapicis	0	0	1	0	0	0	0	0	0	0	0	0	0	0	0	0	0	0	0	0	0	0	0	0	0	0	0	0	0	0	0	0	0	0
OTU_7903	Eukaryota	Alveolata	Ciliophora	Oligohymenophorea	Mobilida	Trichodinidae	Trichodina	Trichodina_sinonovaculae	0	0	1	0	0	0	0	0	0	0	0	0	0	0	0	0	0	0	0	0	0	0	0	0	0	0	0	0	0	0	0	0	0	0
OTU_8041	Eukaryota	Alveolata	Ciliophora	Oligohymenophorea	Mobilida	Trichodinidae	Trichodina	Trichodina_ruditapicis	0	0	0	0	0	0	0	0	0	0	0	1	0	1	0	0	0	0	0	0	0	0	0	0	0	0	0	0	0	0	0	0	0	0
OTU_8156	Eukaryota	Alveolata	Ciliophora	Oligohymenophorea	Mobilida	Trichodinidae	Trichodina	Multi-affiliation	0	0	1	0	0	0	0	0	0	0	0	0	0	0	0	0	0	0	0	0	0	0	0	0	0	0	0	0	0	0	0	0	0	0
OTU_8190	Eukaryota	Alveolata	Ciliophora	Oligohymenophorea	Mobilida	Trichodinidae	Trichodina	Trichodina_sinonovaculae	0	0	1	0	0	0	0	0	0	0	0	0	0	0	0	0	0	0	0	0	0	0	0	0	0	0	0	0	0	0	0	0	0	1
OTU_8327	Eukaryota	Alveolata	Ciliophora	Oligohymenophorea	Mobilida	Trichodinidae	Trichodina	Trichodina_sinonovaculae	1	0	1	0	0	0	0	0	0	0	0	0	0	0	0	0	0	0	0	0	0	0	0	0	0	0	0	0	0	0	0	0	0	0
OTU_8398	Eukaryota	Alveolata	Ciliophora	Oligohymenophorea	Mobilida	Trichodinidae	Trichodina	Trichodina_ruditapicis	0	0	1	0	0	0	0	0	0	0	0	0	0	0	0	0	0	0	0	0	0	0	0	0	0	0	0	0	0	0	0	0	0	1
OTU_8437	Eukaryota	Alveolata	Ciliophora	Oligohymenophorea	Mobilida	Trichodinidae	Trichodina	Trichodina_sinonovaculae	0	0	2	0	0	0	0	0	0	0	0	0	0	0	0	0	0	0	0	0	0	0	0	0	0	0	0	0	0	0	0	0	0	0
OTU_8467	Eukaryota	Alveolata	Ciliophora	Oligohymenophorea	Mobilida	Trichodinidae	Trichodina	Trichodina_sinonovaculae	0	0	0	0	0	0	0	0	0	0	0	1	0	0	0	0	0	0	0	0	0	0	0	0	0	0	0	0	0	0	0	0	0	0
OTU_8526	Eukaryota	Alveolata	Ciliophora	Oligohymenophorea	Mobilida	Trichodinidae	Trichodina	Trichodina_sinonovaculae	0	0	0	0	0	0	0	0	0	0	0	1	1	0	0	0	0	0	0	0	0	0	0	0	0	0	0	0	0	0	0	0	0	0
OTU_8559	Eukaryota	Alveolata	Ciliophora	Oligohymenophorea	Mobilida	Trichodinidae	Trichodina	Trichodina_sinonovaculae	0	0	0	0	0	0	0	0	0	0	0	0	0	0	0	0	0	0	0	0	0	0	0	0	1	0	0	0	0	0	0	0	0	0
OTU_8617	Eukaryota	Alveolata	Ciliophora	Oligohymenophorea	Mobilida	Trichodinidae	Trichodina	Trichodina_sinonovaculae	0	0	1	0	0	0	0	0	0	0	0	0	0	0	0	0	0	0	0	0	0	0	0	0	0	0	0	0	0	0	0	0	0	0
OTU_8634	Eukaryota	Alveolata	Ciliophora	Oligohymenophorea	Mobilida	Trichodinidae	Trichodina	Trichodina_sinonovaculae	0	0	0	0	0	0	0	0	0	0	0	1	0	1	0	0	0	0	0	0	0	0	0	0	0	0	0	0	0	0	0	0	0	0
OTU_9187	Eukaryota	Alveolata	Ciliophora	Oligohymenophorea	Mobilida	Trichodinidae	Trichodina	Multi-affiliation	0	0	1	0	0	0	0	0	0	0	0	1	0	0	0	0	0	0	0	0	0	0	0	0	0	0	0	0	0	0	0	0	0	0
OTU_9212	Eukaryota	Alveolata	Ciliophora	Oligohymenophorea	Mobilida	Trichodinidae	Trichodina	Trichodina_sinonovaculae	0	0	0	0	0	0	0	0	0	0	0	0	1	0	0	0	0	0	0	0	0	0	0	0	1	0	0	0	0	0	0	0	0	0
OTU_9342	Eukaryota	Alveolata	Ciliophora	Oligohymenophorea	Mobilida	Trichodinidae	Trichodina	Trichodina_sinonovaculae	0	0	2	0	0	0	0	0	0	0	0	0	0	0	0	0	0	0	0	0	0	0	0	0	0	0	0	0	0	0	0	0	0	0
OTU_9354	Eukaryota	Alveolata	Ciliophora	Oligohymenophorea	Mobilida	Trichodinidae	Trichodina	Trichodina_sinonovaculae	0	0	2	0	0	0	0	0	0	0	0	0	0	0	0	0	0	0	0	0	0	0	0	0	0	0	0	0	0	0	0	0	0	0
OTU_9355	Eukaryota	Alveolata	Ciliophora	Oligohymenophorea	Mobilida	Trichodinidae	Trichodina	Trichodina_sinonovaculae	0	0	1	0	0	0	0	0	0	0	0	0	0	1	0	0	0	0	0	0	0	0	0	0	0	0	0	0	0	0	0	0	0	0
OTU_9657	Eukaryota	Alveolata	Apicomplexa	Apicomplexa_X	Gregarines	Gregarines_X	Gregarinidae	Gregarinidae_sp.	0	0	0	0	0	0	0	0	0	0	0	0	0	0	0	0	0	0	0	0	0	0	2	0	0	0	0	0	0	0	0	0	0	0
OTU_10173	Eukaryota	Multi-affiliation	Multi-affiliation	Multi-affiliation	Multi-affiliation	Multi-affiliation	Multi-affiliation	Multi-affiliation	0	0	0	0	0	0	0	1	0	0	0	0	0	0	0	0	0	0	0	0	0	0	0	0	0	0	0	0	0	0	0	0	0	0
OTU_10797	Eukaryota	Multi-affiliation	Multi-affiliation	Multi-affiliation	Multi-affiliation	Multi-affiliation	Multi-affiliation	Multi-affiliation	0	0	0	0	0	0	0	0	0	0	0	0	0	0	0	0	0	0	0	0	0	0	0	0	0	0	0	0	0	0	0	1	0	0
OTU_10829	Eukaryota	Multi-affiliation	Multi-affiliation	Multi-affiliation	Multi-affiliation	Multi-affiliation	Multi-affiliation	Multi-affiliation	0	0	1	0	0	0	0	0	0	0	0	0	0	0	0	0	0	0	0	0	0	0	0	0	0	0	0	0	0	0	0	0	0	0
OTU_10921	Eukaryota	Multi-affiliation	Multi-affiliation	Multi-affiliation	Multi-affiliation	Multi-affiliation	Multi-affiliation	Multi-affiliation	0	0	0	0	0	0	0	0	0	0	0	0	0	0	0	0	0	0	0	0	0	0	0	0	0	0	0	0	0	2	0	0	0	0
OTU_11422	Eukaryota	Alveolata	Ciliophora	Oligohymenophorea	Peritrichia	Zoothamniidae	Zoothamnopsis	Zoothamnopsis_sinica	0	0	0	0	0	0	0	0	0	0	0	0	0	0	0	0	0	0	0	0	0	0	1	0	0	0	0	0	0	0	0	0	0	0
OTU_11432	Eukaryota	Alveolata	Ciliophora	Oligohymenophorea	Peritrichia	Zoothamniidae	Zoothamnopsis	Zoothamnopsis_sinica	0	0	0	0	0	0	0	0	0	0	0	0	0	0	0	0	0	0	0	0	0	0	1	0	0	0	0	0	0	0	0	0	0	0
OTU_11805	Eukaryota	Alveolata	Ciliophora	Oligohymenophorea	Peritrichia	Zoothamniidae	Zoothamnopsis	Zoothamnopsis_sinica	0	0	0	0	0	0	0	0	0	0	0	1	0	0	0	0	0	0	0	0	0	0	1	0	0	0	0	0	0	0	0	0	0	0
OTU_12186	Eukaryota	Alveolata	Ciliophora	Oligohymenophorea	Peritrichia	Zoothamniidae	Zoothamnopsis	Zoothamnopsis_sinica	0	0	0	0	0	0	0	0	0	0	0	0	0	0	0	0	0	0	0	0	0	0	1	0	0	0	0	0	0	0	0	0	0	0
OTU_13433	Eukaryota	Alveolata	Ciliophora	Oligohymenophorea	Peritrichia	Zoothamniidae	Zoothamnopsis	Zoothamnopsis_sinica	0	0	0	2	0	0	0	0	0	0	0	0	0	0	0	0	0	0	0	0	0	0	0	0	0	0	0	0	0	0	0	0	0	0
OTU_13911	Eukaryota	Alveolata	Ciliophora	Oligohymenophorea	Peritrichia	Zoothamniidae	Zoothamnium	Zoothamnium_pelagicum	0	0	0	0	0	0	0	2	0	0	0	0	0	0	0	0	0	0	0	0	0	0	0	0	0	0	0	0	0	0	0	0	0	0
OTU_13947	Eukaryota	Alveolata	Ciliophora	Oligohymenophorea	Peritrichia	Zoothamniidae	Zoothamnium	Zoothamnium_pelagicum	0	0	0	0	0	0	0	4	0	0	0	0	0	0	0	0	0	0	0	0	0	0	0	0	0	0	0	0	0	0	0	0	0	0
OTU_14145	Eukaryota	Alveolata	Ciliophora	Oligohymenophorea	Peritrichia	Zoothamniidae	Zoothamnium	Zoothamnium_pelagicum	0	0	0	0	0	0	0	6	0	0	0	0	0	0	0	0	0	0	0	0	0	0	0	0	0	0	0	0	0	0	0	0	0	0
OTU_14157	Eukaryota	Alveolata	Ciliophora	Oligohymenophorea	Peritrichia	Zoothamniidae	Zoothamnium	Zoothamnium_pelagicum	0	0	0	0	0	0	0	0	0	0	0	1	0	0	0	0	0	0	0	0	0	0	0	0	0	0	0	0	0	0	0	1	0	0
OTU_14191	Eukaryota	Alveolata	Ciliophora	Oligohymenophorea	Peritrichia	Zoothamniidae	Zoothamnium	Zoothamnium_pelagicum	0	0	0	0	0	0	0	0	0	0	0	1	0	0	0	0	0	0	0	0	0	0	0	0	0	0	0	0	0	0	0	0	0	0
OTU_14347	Eukaryota	Alveolata	Ciliophora	Oligohymenophorea	Peritrichia	Zoothamniidae	Zoothamnium	Zoothamnium_pelagicum	0	0	0	0	0	0	0	0	0	0	0	0	0	0	0	0	0	0	0	0	0	0	0	0	0	0	0	0	2	0	0	0	0	0
OTU_14351	Eukaryota	Alveolata	Ciliophora	Oligohymenophorea	Peritrichia	Zoothamniidae	Zoothamnium	Zoothamnium_pelagicum	0	0	0	0	0	0	0	2	0	0	0	0	0	0	0	0	0	0	0	0	0	0	0	0	0	0	0	0	0	0	0	0	0	0
OTU_14367	Eukaryota	Alveolata	Ciliophora	Oligohymenophorea	Peritrichia	Zoothamniidae	Zoothamnium	Zoothamnium_pelagicum	0	0	0	0	0	0	0	2	0	0	0	0	0	0	0	0	0	0	0	0	0	0	0	0	0	0	0	0	0	0	0	0	0	0
OTU_14368	Eukaryota	Alveolata	Ciliophora	Oligohymenophorea	Peritrichia	Zoothamniidae	Zoothamnium	Zoothamnium_pelagicum	0	0	0	0	0	0	0	3	0	0	0	0	0	0	0	0	0	0	0	0	0	0	0	0	0	0	0	0	0	0	0	0	0	0
OTU_14561	Eukaryota	Alveolata	Ciliophora	Oligohymenophorea	Peritrichia	Zoothamniidae	Zoothamnium	Zoothamnium_pelagicum	0	0	0	0	0	0	0	2	0	0	0	0	0	0	0	0	0	0	0	0	0	0	0	0	0	0	0	0	0	0	0	0	0	0
OTU_14565	Eukaryota	Alveolata	Ciliophora	Oligohymenophorea	Peritrichia	Zoothamniidae	Zoothamnium	Zoothamnium_pelagicum	0	0	0	0	0	0	0	3	0	0	0	0	0	0	0	0	0	0	0	0	0	0	0	0	0	0	0	0	0	0	0	0	0	0
OTU_14586	Eukaryota	Alveolata	Ciliophora	Oligohymenophorea	Peritrichia	Zoothamniidae	Zoothamnium	Zoothamnium_pelagicum	0	0	0	0	0	0	0	2	0	0	0	0	0	0	0	0	0	0	0	0	0	0	0	0	0	0	0	0	0	0	0	0	0	0
OTU_14591	Eukaryota	Alveolata	Ciliophora	Oligohymenophorea	Peritrichia	Zoothamniidae	Zoothamnium	Zoothamnium_pelagicum	0	0	0	0	0	0	0	3	0	0	0	1	0	0	0	0	0	0	0	0	0	0	0	0	0	0	0	0	0	0	0	0	0	0
OTU_14629	Eukaryota	Alveolata	Ciliophora	Oligohymenophorea	Peritrichia	Zoothamniidae	Zoothamnium	Zoothamnium_pelagicum	0	0	0	0	0	0	0	2	0	0	0	0	0	0	0	0	0	0	0	0	0	0	0	0	0	0	0	0	0	0	0	0	0	0
OTU_14632	Eukaryota	Alveolata	Ciliophora	Oligohymenophorea	Peritrichia	Zoothamniidae	Zoothamnium	Zoothamnium_pelagicum	0	0	0	0	0	0	0	4	0	0	0	0	0	0	0	0	0	0	0	0	0	0	0	0	0	0	0	0	0	0	0	0	0	0
OTU_14648	Eukaryota	Alveolata	Ciliophora	Oligohymenophorea	Peritrichia	Zoothamniidae	Zoothamnium	Zoothamnium_pelagicum	0	0	0	0	0	0	0	2	0	0	0	0	0	0	0	0	0	0	0	0	0	0	0	0	0	0	0	0	0	0	0	0	0	0
OTU_14656	Eukaryota	Alveolata	Ciliophora	Oligohymenophorea	Peritrichia	Zoothamniidae	Zoothamnium	Zoothamnium_pelagicum	0	0	0	0	0	0	0	2	0	0	0	0	0	0	0	0	0	0	0	0	0	0	0	0	0	0	0	0	0	0	0	0	0	0
OTU_14668	Eukaryota	Alveolata	Ciliophora	Oligohymenophorea	Peritrichia	Zoothamniidae	Zoothamnium	Zoothamnium_pelagicum	0	0	0	0	0	0	0	2	0	0	0	0	0	0	0	0	0	0	0	0	0	0	0	0	0	0	0	0	0	0	0	0	0	0
OTU_14693	Eukaryota	Alveolata	Ciliophora	Oligohymenophorea	Peritrichia	Zoothamniidae	Zoothamnium	Zoothamnium_pelagicum	0	0	0	0	0	0	0	1	0	0	0	0	0	0	0	0	0	0	0	0	0	0	0	0	0	0	0	0	0	0	0	0	0	0
OTU_14786	Eukaryota	Alveolata	Ciliophora	Oligohymenophorea	Peritrichia	Zoothamniidae	Zoothamnium	Zoothamnium_pelagicum	0	0	0	0	0	0	0	1	0	0	0	0	0	0	0	0	0	0	0	0	0	0	0	0	0	0	0	0	0	0	0	0	0	0
OTU_14990	Eukaryota	Alveolata	Ciliophora	Oligohymenophorea	Peritrichia	Zoothamniidae	Zoothamnium	Zoothamnium_pelagicum	0	0	0	0	0	0	0	2	0	0	0	0	0	0	0	0	0	0	0	0	0	0	0	0	0	0	0	0	0	0	0	0	0	0
OTU_14992	Eukaryota	Alveolata	Ciliophora	Oligohymenophorea	Peritrichia	Zoothamniidae	Zoothamnium	Zoothamnium_pelagicum	0	0	0	0	0	0	0	0	0	0	0	0	1	0	0	0	0	0	0	0	0	0	0	0	0	0	0	0	0	0	0	0	0	0
OTU_15011	Eukaryota	Alveolata	Ciliophora	Oligohymenophorea	Peritrichia	Zoothamniidae	Zoothamnium	Zoothamnium_pelagicum	0	0	0	0	0	0	0	2	0	0	0	0	0	0	0	0	0	0	0	0	0	0	0	0	0	0	0	0	0	0	0	0	0	0
OTU_15079	Eukaryota	Alveolata	Ciliophora	Oligohymenophorea	Peritrichia	Zoothamniidae	Zoothamnium	Zoothamnium_pelagicum	0	0	0	0	0	0	0	2	0	0	0	0	0	0	0	0	0	0	0	0	0	0	0	0	0	0	0	0	0	0	0	0	0	0
OTU_15155	Eukaryota	Alveolata	Ciliophora	Oligohymenophorea	Peritrichia	Zoothamniidae	Zoothamnium	Zoothamnium_alternans	0	0	0	0	0	0	0	2	0	0	0	0	0	0	0	0	0	0	0	0	0	0	0	0	0	0	0	0	0	0	0	0	0	0
OTU_15305	Eukaryota	Alveolata	Ciliophora	Oligohymenophorea	Peritrichia	Zoothamniidae	Zoothamnium	Zoothamnium_pelagicum	0	0	0	0	0	0	0	2	0	0	0	0	0	0	0	0	0	0	0	0	0	0	0	0	0	0	0	0	0	0	0	0	0	0
OTU_15376	Eukaryota	Alveolata	Ciliophora	Oligohymenophorea	Peritrichia	Zoothamniidae	Zoothamnium	Zoothamnium_pelagicum	0	0	0	0	0	0	0	2	0	0	0	0	0	0	0	0	0	0	0	0	0	0	0	0	0	0	0	0	0	0	0	0	0	0
OTU_15387	Eukaryota	Alveolata	Ciliophora	Oligohymenophorea	Peritrichia	Zoothamniidae	Zoothamnium	Zoothamnium_pelagicum	0	0	0	0	0	0	0	1	0	0	0	0	0	0	0	0	0	0	0	0	0	0	0	0	0	0	0	0	0	0	0	0	0	0
OTU_15616	Eukaryota	Alveolata	Ciliophora	Oligohymenophorea	Peritrichia	Vaginicolidae	Vaginicolidae_X	Vaginicolidae_X_sp.	0	0	0	0	0	0	0	0	0	0	0	0	2	0	0	0	0	0	0	0	0	0	0	0	0	0	0	0	0	0	0	0	0	0
OTU_17594	Eukaryota	Alveolata	Ciliophora	Oligohymenophorea	Sessilida	Vorticellidae	Vorticella	Vorticella_sp.	0	0	0	0	0	0	0	0	0	0	0	0	0	0	0	0	0	0	0	0	0	0	2	0	0	0	0	0	0	0	0	0	0	0
OTU_21102	Eukaryota	Alveolata	Ciliophora	Spirotrichea	Choreotrichia	Dictyocystidae	Codonellopsis	Codonellopsis_nipponica	0	0	0	0	0	0	0	0	0	0	2	0	0	0	0	0	0	0	0	0	0	0	0	0	0	0	0	0	0	0	0	0	0	0
OTU_21105	Eukaryota	Alveolata	Ciliophora	Spirotrichea	Choreotrichia	Dictyocystidae	Codonellopsis	Codonellopsis_nipponica	0	0	0	0	0	0	1	0	0	0	0	0	0	0	0	0	0	0	0	0	0	0	0	0	0	1	0	0	0	0	0	0	0	0
OTU_21133	Eukaryota	Alveolata	Ciliophora	Spirotrichea	Choreotrichia	Dictyocystidae	Codonellopsis	Codonellopsis_nipponica	0	0	0	0	0	0	0	0	0	0	1	0	0	0	0	0	0	0	0	0	0	0	0	0	0	0	0	0	0	0	0	0	0	0
OTU_21163	Eukaryota	Alveolata	Ciliophora	Spirotrichea	Choreotrichia	Dictyocystidae	Codonellopsis	Codonellopsis_nipponica	0	0	0	0	0	1	2	0	0	0	0	0	0	0	0	0	0	0	0	0	0	0	0	0	0	0	0	0	0	0	0	0	0	0
OTU_21608	Eukaryota	Alveolata	Ciliophora	Spirotrichea	Choreotrichia	Dictyocystidae	Codonellopsis	Codonellopsis_nipponica	0	0	0	0	0	0	0	0	0	0	0	0	0	0	0	0	2	0	0	0	0	0	0	0	0	0	0	0	0	0	0	0	0	0
OTU_21636	Eukaryota	Alveolata	Ciliophora	Spirotrichea	Choreotrichia	Dictyocystidae	Codonellopsis	Codonellopsis_nipponica	0	0	0	0	0	0	0	0	0	0	1	0	0	0	0	0	0	0	1	0	0	0	0	0	0	0	0	0	0	0	0	0	0	0
OTU_21742	Eukaryota	Alveolata	Ciliophora	Spirotrichea	Choreotrichia	Dictyocystidae	Codonellopsis	Codonellopsis_nipponica	0	0	0	0	0	0	0	0	0	0	0	0	0	0	0	0	1	1	0	0	0	0	0	0	0	0	0	0	0	0	0	0	0	0
OTU_21746	Eukaryota	Alveolata	Ciliophora	Spirotrichea	Choreotrichia	Tintinnidae	Tintinnopsis	Tintinnopsis_sp.	0	0	0	0	0	0	0	0	0	0	0	0	0	0	0	0	1	1	0	0	0	0	0	0	0	0	0	0	0	0	0	0	0	0
OTU_21759	Eukaryota	Alveolata	Ciliophora	Spirotrichea	Choreotrichia	Dictyocystidae	Codonellopsis	Codonellopsis_nipponica	0	0	0	0	0	0	0	0	0	0	0	0	0	0	0	0	0	0	1	0	0	0	0	0	0	0	0	0	0	0	0	0	0	0
OTU_21852	Eukaryota	Alveolata	Ciliophora	Spirotrichea	Choreotrichia	Dictyocystidae	Codonellopsis	Codonellopsis_nipponica	0	0	0	0	0	0	1	0	0	0	0	0	0	0	0	0	0	0	0	0	0	0	0	0	0	0	0	0	0	0	0	0	0	0
OTU_21933	Eukaryota	Alveolata	Ciliophora	Spirotrichea	Choreotrichia	Dictyocystidae	Codonellopsis	Codonellopsis_nipponica	0	0	0	0	0	0	0	0	0	0	0	0	0	0	0	0	0	1	1	0	0	0	0	0	0	0	0	0	0	0	0	0	0	0
OTU_21989	Eukaryota	Alveolata	Ciliophora	Spirotrichea	Choreotrichia	Dictyocystidae	Codonellopsis	Codonellopsis_nipponica	0	0	0	0	0	0	0	0	0	0	0	0	0	0	0	0	0	0	0	0	0	0	0	0	0	1	0	0	0	0	0	0	0	0
OTU_22000	Eukaryota	Alveolata	Ciliophora	Spirotrichea	Choreotrichia	Dictyocystidae	Codonellopsis	Codonellopsis_nipponica	0	0	0	0	0	0	2	0	0	0	0	0	0	0	0	0	1	0	0	0	0	0	0	0	0	0	0	0	0	0	0	0	0	0
OTU_22042	Eukaryota	Alveolata	Ciliophora	Spirotrichea	Choreotrichia	Dictyocystidae	Codonellopsis	Codonellopsis_nipponica	0	0	0	0	0	0	0	0	0	0	0	0	0	0	0	0	1	0	0	0	0	0	0	0	0	1	0	0	0	0	0	0	0	0
OTU_22075	Eukaryota	Alveolata	Ciliophora	Spirotrichea	Choreotrichia	Dictyocystidae	Codonellopsis	Codonellopsis_nipponica	0	0	0	0	0	0	0	0	0	0	0	0	0	0	0	0	0	1	0	0	0	0	0	0	0	0	0	0	0	0	0	0	0	0
OTU_22087	Eukaryota	Alveolata	Ciliophora	Spirotrichea	Choreotrichia	Dictyocystidae	Codonellopsis	Codonellopsis_nipponica	0	0	0	0	0	0	0	0	0	0	0	0	0	0	0	0	0	0	2	0	0	0	0	0	0	0	0	0	0	0	0	0	0	0
OTU_22123	Eukaryota	Alveolata	Ciliophora	Spirotrichea	Choreotrichia	Dictyocystidae	Codonellopsis	Codonellopsis_nipponica	0	0	0	0	0	0	0	0	0	0	0	0	0	0	0	0	1	1	0	0	0	0	0	0	0	0	0	0	0	0	0	0	0	0
OTU_22128	Eukaryota	Alveolata	Ciliophora	Spirotrichea	Choreotrichia	Dictyocystidae	Codonellopsis	Codonellopsis_nipponica	0	0	0	0	0	0	1	0	0	0	0	0	0	0	0	0	1	0	1	0	0	0	0	0	0	0	0	0	0	0	0	0	0	0
OTU_22413	Eukaryota	Alveolata	Ciliophora	Spirotrichea	Choreotrichia	Dictyocystidae	Codonellopsis	Codonellopsis_nipponica	0	0	0	0	0	0	0	0	0	0	0	0	0	0	0	0	1	0	1	0	0	0	0	0	0	0	0	0	0	0	0	0	0	0
OTU_22416	Eukaryota	Alveolata	Ciliophora	Spirotrichea	Choreotrichia	Dictyocystidae	Codonellopsis	Codonellopsis_nipponica	0	0	0	0	0	0	0	0	0	0	0	0	0	0	0	0	0	1	0	0	0	0	0	0	0	0	0	0	0	0	0	0	0	0
OTU_22449	Eukaryota	Alveolata	Ciliophora	Spirotrichea	Choreotrichia	Dictyocystidae	Codonellopsis	Codonellopsis_nipponica	0	0	0	0	0	0	0	0	0	0	0	0	0	0	0	0	0	0	2	0	0	0	0	0	0	0	0	0	0	0	0	0	0	0
OTU_22455	Eukaryota	Alveolata	Ciliophora	Spirotrichea	Choreotrichia	Dictyocystidae	Codonellopsis	Codonellopsis_nipponica	0	0	0	0	0	0	0	0	0	0	0	0	0	0	0	0	1	0	2	0	0	0	0	0	0	0	0	0	0	0	0	0	0	0
OTU_22460	Eukaryota	Alveolata	Ciliophora	Spirotrichea	Choreotrichia	Dictyocystidae	Codonellopsis	Codonellopsis_nipponica	0	0	0	0	0	1	0	0	0	0	0	0	0	0	0	0	0	1	1	0	0	0	0	0	1	1	0	0	0	0	0	0	0	0
OTU_22519	Eukaryota	Alveolata	Ciliophora	Spirotrichea	Choreotrichia	Dictyocystidae	Codonellopsis	Codonellopsis_nipponica	0	0	0	0	0	1	0	0	0	0	1	0	0	0	0	0	0	1	0	0	0	0	0	0	0	0	0	0	0	0	0	0	0	0
OTU_22523	Eukaryota	Alveolata	Ciliophora	Spirotrichea	Choreotrichia	Dictyocystidae	Codonellopsis	Codonellopsis_nipponica	0	0	0	0	0	0	0	0	0	0	0	0	0	0	0	0	0	2	0	0	0	0	0	0	0	0	0	0	0	0	0	0	0	0
OTU_22572	Eukaryota	Alveolata	Ciliophora	Spirotrichea	Choreotrichia	Tintinnidae	Tintinnopsis	Tintinnopsis_sp.	1	0	0	0	0	1	0	0	0	0	0	0	0	0	0	0	0	0	0	0	0	0	0	0	0	0	0	0	0	0	0	0	0	0
OTU_22701	Eukaryota	Alveolata	Ciliophora	Spirotrichea	Choreotrichia	Dictyocystidae	Codonellopsis	Codonellopsis_nipponica	0	0	0	0	0	0	0	0	0	1	0	0	0	0	0	0	0	0	0	0	0	0	0	0	0	0	0	0	0	0	0	0	0	0
OTU_22764	Eukaryota	Alveolata	Ciliophora	Spirotrichea	Choreotrichia	Dictyocystidae	Codonellopsis	Codonellopsis_nipponica	0	0	0	0	0	0	0	0	0	0	0	0	0	0	0	0	1	1	0	0	0	0	0	0	0	0	0	0	0	0	0	0	0	0
OTU_22899	Eukaryota	Alveolata	Ciliophora	Spirotrichea	Choreotrichia	Dictyocystidae	Codonellopsis	Codonellopsis_nipponica	0	0	0	0	0	0	1	0	0	0	0	0	0	0	0	0	0	0	0	0	0	0	0	0	0	0	0	0	0	0	0	0	0	0
OTU_23091	Eukaryota	Alveolata	Ciliophora	Spirotrichea	Choreotrichia	Tintinnidae	Tintinnopsis	Tintinnopsis_sp.	0	0	0	0	0	0	0	0	0	1	0	0	0	0	0	0	0	0	0	0	0	0	0	0	0	0	0	0	0	0	0	0	0	0
OTU_23168	Eukaryota	Alveolata	Ciliophora	Spirotrichea	Choreotrichia	Tintinnidae	Tintinnopsis	Tintinnopsis_sp.	0	0	0	0	0	0	0	0	0	0	1	0	0	0	0	0	0	0	0	0	0	0	0	0	0	0	0	0	0	0	0	0	0	0
OTU_23186	Eukaryota	Alveolata	Ciliophora	Spirotrichea	Choreotrichia	Tintinnidae	Tintinnopsis	Tintinnopsis_sp.	0	0	0	0	0	0	0	0	0	0	0	0	0	0	0	0	0	1	0	0	0	0	0	0	0	0	0	0	0	0	0	0	0	0
OTU_23188	Eukaryota	Alveolata	Ciliophora	Spirotrichea	Choreotrichia	Tintinnidae	Tintinnopsis	Tintinnopsis_sp.	0	0	0	0	0	0	0	0	0	0	0	0	0	0	0	0	0	1	0	0	0	0	0	0	0	0	0	0	0	0	0	0	0	0
OTU_23280	Eukaryota	Alveolata	Ciliophora	Spirotrichea	Choreotrichia	Tintinnidae	Tintinnopsis	Tintinnopsis_sp.	0	0	0	0	0	0	0	0	0	0	0	0	0	0	0	0	0	0	1	0	0	0	0	0	0	0	0	0	0	0	0	0	0	0
OTU_23419	Eukaryota	Alveolata	Ciliophora	Spirotrichea	Choreotrichia	Tintinnidae	Tintinnopsis	Tintinnopsis_sp.	0	0	0	0	0	0	0	0	0	0	0	0	0	0	0	0	0	0	2	0	0	0	0	0	0	0	0	0	0	0	0	0	0	0
OTU_23624	Eukaryota	Alveolata	Ciliophora	Spirotrichea	Choreotrichia	Dictyocystidae	Codonellopsis	Codonellopsis_nipponica	0	0	0	0	0	0	2	0	0	0	0	0	0	0	0	0	0	0	0	0	0	0	0	0	0	0	0	0	0	0	0	0	0	0
OTU_23645	Eukaryota	Alveolata	Ciliophora	Spirotrichea	Choreotrichia	Dictyocystidae	Codonellopsis	Codonellopsis_nipponica	0	0	0	0	0	0	0	0	0	0	0	0	0	0	0	0	1	0	1	0	0	0	0	0	0	0	0	0	0	0	0	0	0	0
OTU_23655	Eukaryota	Alveolata	Ciliophora	Spirotrichea	Choreotrichia	Dictyocystidae	Codonellopsis	Codonellopsis_nipponica	0	0	0	0	0	1	0	0	0	1	0	0	0	0	0	0	1	0	1	0	0	0	0	0	0	0	0	0	0	0	0	0	0	0
OTU_23699	Eukaryota	Alveolata	Ciliophora	Spirotrichea	Choreotrichia	Dictyocystidae	Codonellopsis	Codonellopsis_nipponica	0	0	0	0	0	0	0	0	0	0	1	0	0	0	0	0	0	0	1	0	0	0	0	0	0	0	0	0	0	0	0	0	0	0
OTU_23707	Eukaryota	Alveolata	Ciliophora	Spirotrichea	Choreotrichia	Dictyocystidae	Codonellopsis	Codonellopsis_nipponica	0	0	0	0	0	0	0	0	0	0	0	0	0	0	0	0	0	0	0	0	0	0	0	0	0	1	0	0	0	0	0	0	0	0
OTU_23730	Eukaryota	Alveolata	Ciliophora	Spirotrichea	Choreotrichia	Dictyocystidae	Codonellopsis	Codonellopsis_nipponica	0	0	0	0	0	0	1	0	0	0	0	0	0	0	0	0	0	1	0	0	0	0	0	0	0	0	0	0	0	0	0	0	0	0
OTU_23740	Eukaryota	Alveolata	Ciliophora	Spirotrichea	Choreotrichia	Dictyocystidae	Codonellopsis	Codonellopsis_nipponica	1	0	0	0	0	0	0	0	0	0	1	0	0	0	0	0	0	0	1	0	0	0	0	0	0	0	0	0	0	0	0	0	0	0
OTU_23757	Eukaryota	Alveolata	Ciliophora	Spirotrichea	Choreotrichia	Dictyocystidae	Codonellopsis	Codonellopsis_nipponica	0	0	0	0	0	1	2	0	0	2	3	0	0	0	0	0	4	3	3	0	0	0	0	0	0	0	0	0	0	0	0	0	0	0
OTU_23848	Eukaryota	Alveolata	Ciliophora	Spirotrichea	Choreotrichia	Dictyocystidae	Codonellopsis	Codonellopsis_nipponica	0	0	0	0	0	0	1	0	0	0	0	0	0	0	0	0	0	0	1	0	0	0	0	0	0	0	0	0	0	0	0	0	0	0
OTU_23863	Eukaryota	Alveolata	Ciliophora	Spirotrichea	Choreotrichia	Dictyocystidae	Codonellopsis	Codonellopsis_nipponica	0	0	0	0	0	0	0	0	0	0	0	0	0	0	0	0	0	1	0	0	0	0	0	0	0	1	0	0	0	0	0	0	0	0
OTU_23917	Eukaryota	Alveolata	Ciliophora	Spirotrichea	Choreotrichia	Dictyocystidae	Codonellopsis	Codonellopsis_nipponica	0	0	0	0	0	0	0	0	0	0	0	0	0	0	0	0	0	2	0	0	0	0	0	0	0	0	0	0	0	0	0	0	0	0
OTU_23926	Eukaryota	Alveolata	Ciliophora	Spirotrichea	Choreotrichia	Dictyocystidae	Codonellopsis	Codonellopsis_nipponica	0	0	0	0	0	0	0	0	0	0	0	0	0	0	0	0	0	1	0	0	0	0	0	0	0	0	0	0	0	0	0	0	0	0
OTU_23951	Eukaryota	Alveolata	Ciliophora	Spirotrichea	Choreotrichia	Dictyocystidae	Codonellopsis	Codonellopsis_nipponica	0	0	0	0	0	0	0	0	0	0	0	0	0	0	0	0	2	0	0	0	0	0	0	0	0	0	0	0	0	0	0	0	0	0
OTU_23953	Eukaryota	Alveolata	Ciliophora	Spirotrichea	Choreotrichia	Dictyocystidae	Codonellopsis	Codonellopsis_nipponica	0	0	0	0	0	0	0	0	0	0	0	0	0	0	0	0	1	0	0	0	0	0	0	0	0	0	0	0	0	0	0	0	0	0
OTU_23963	Eukaryota	Alveolata	Ciliophora	Spirotrichea	Choreotrichia	Dictyocystidae	Codonellopsis	Codonellopsis_nipponica	0	0	0	0	0	0	0	0	0	0	0	0	0	0	0	0	1	0	1	0	0	0	0	0	0	0	0	0	0	0	0	0	0	0
OTU_23967	Eukaryota	Alveolata	Ciliophora	Spirotrichea	Choreotrichia	Dictyocystidae	Codonellopsis	Codonellopsis_nipponica	0	0	0	0	0	0	0	0	0	0	0	0	0	0	0	0	0	0	2	0	0	0	0	0	0	0	0	0	0	0	0	0	0	0
OTU_24003	Eukaryota	Alveolata	Ciliophora	Spirotrichea	Choreotrichia	Dictyocystidae	Codonellopsis	Codonellopsis_nipponica	0	0	0	0	0	0	1	0	0	0	0	0	0	0	0	0	0	1	0	0	0	0	0	0	0	0	0	0	0	0	0	0	0	0
OTU_24033	Eukaryota	Alveolata	Ciliophora	Spirotrichea	Choreotrichia	Dictyocystidae	Codonellopsis	Codonellopsis_nipponica	0	0	0	0	0	0	0	0	0	0	0	0	0	0	0	0	0	1	0	0	0	0	0	0	0	0	0	0	0	0	0	0	0	0
OTU_24055	Eukaryota	Alveolata	Ciliophora	Spirotrichea	Choreotrichia	Dictyocystidae	Codonellopsis	Codonellopsis_nipponica	0	0	0	0	0	0	0	0	0	0	0	0	0	0	0	0	0	1	1	0	0	0	0	0	0	0	0	0	0	0	0	0	0	0
OTU_24168	Eukaryota	Alveolata	Ciliophora	Spirotrichea	Choreotrichia	Dictyocystidae	Codonellopsis	Codonellopsis_nipponica	0	0	0	0	0	0	0	0	0	0	0	0	0	0	0	0	0	0	1	0	0	0	0	0	0	1	0	0	0	0	0	0	0	0
OTU_24273	Eukaryota	Alveolata	Ciliophora	Spirotrichea	Choreotrichia	Dictyocystidae	Codonellopsis	Codonellopsis_nipponica	0	0	0	0	0	1	1	0	0	0	0	0	0	0	0	0	1	0	0	0	0	0	0	0	0	0	0	0	0	0	0	0	0	0
OTU_24295	Eukaryota	Alveolata	Ciliophora	Spirotrichea	Choreotrichia	Dictyocystidae	Codonellopsis	Codonellopsis_nipponica	0	0	0	0	0	0	1	0	0	0	1	0	0	0	0	0	0	0	1	0	0	0	0	0	0	0	0	0	0	0	0	0	0	0
OTU_24296	Eukaryota	Alveolata	Ciliophora	Spirotrichea	Choreotrichia	Dictyocystidae	Codonellopsis	Codonellopsis_nipponica	0	0	0	0	0	0	1	0	0	0	0	0	0	0	0	0	0	0	2	0	0	0	0	0	0	0	0	0	0	0	0	0	0	0
OTU_24344	Eukaryota	Alveolata	Ciliophora	Spirotrichea	Choreotrichia	Dictyocystidae	Codonellopsis	Codonellopsis_nipponica	0	0	0	0	0	0	0	0	0	0	0	0	0	0	0	0	1	1	0	0	0	0	0	0	0	0	0	0	0	0	0	0	0	0
OTU_24351	Eukaryota	Alveolata	Ciliophora	Spirotrichea	Choreotrichia	Dictyocystidae	Codonellopsis	Codonellopsis_nipponica	0	0	0	0	0	0	0	0	0	0	0	0	0	0	0	0	1	0	0	0	0	0	0	0	0	1	0	0	0	0	0	0	0	0
OTU_24389	Eukaryota	Alveolata	Ciliophora	Spirotrichea	Choreotrichia	Dictyocystidae	Codonellopsis	Codonellopsis_nipponica	0	0	0	0	0	0	0	0	0	0	0	0	0	0	0	0	0	0	1	0	0	0	0	0	0	0	0	0	0	0	0	0	0	0
OTU_24417	Eukaryota	Alveolata	Ciliophora	Spirotrichea	Choreotrichia	Dictyocystidae	Codonellopsis	Codonellopsis_nipponica	0	0	0	0	0	0	0	0	0	0	0	0	0	0	0	0	1	0	1	0	0	0	0	0	0	2	0	0	0	0	0	0	0	0
OTU_24608	Eukaryota	Alveolata	Ciliophora	Spirotrichea	Choreotrichia	Dictyocystidae	Codonellopsis	Codonellopsis_nipponica	0	0	0	0	0	0	1	0	0	0	0	0	0	0	0	0	0	0	1	0	0	0	0	0	0	0	0	0	0	0	0	0	0	0
OTU_24615	Eukaryota	Alveolata	Ciliophora	Spirotrichea	Choreotrichia	Dictyocystidae	Codonellopsis	Codonellopsis_nipponica	0	0	0	0	0	0	0	0	0	0	0	0	0	0	0	0	1	0	1	0	0	0	0	0	0	1	0	0	0	0	0	0	0	0
OTU_24618	Eukaryota	Alveolata	Ciliophora	Spirotrichea	Choreotrichia	Dictyocystidae	Codonellopsis	Codonellopsis_nipponica	0	0	0	0	0	0	0	0	0	0	0	0	0	0	0	0	1	0	0	0	0	0	0	0	0	1	0	0	0	0	0	0	0	0
OTU_24630	Eukaryota	Alveolata	Ciliophora	Spirotrichea	Choreotrichia	Multi-affiliation	Multi-affiliation	Multi-affiliation	0	0	0	0	0	0	0	0	0	0	0	0	0	0	0	0	0	0	0	0	0	0	0	0	0	2	0	0	0	0	0	0	0	0
OTU_24760	Eukaryota	Alveolata	Ciliophora	Spirotrichea	Choreotrichia	Dictyocystidae	Codonellopsis	Codonellopsis_nipponica	0	0	0	0	0	0	1	0	0	0	0	0	0	0	0	0	0	1	0	0	0	0	0	0	0	0	0	0	0	0	0	0	0	0
OTU_24787	Eukaryota	Alveolata	Ciliophora	Spirotrichea	Choreotrichia	Dictyocystidae	Codonellopsis	Codonellopsis_nipponica	0	0	0	0	0	0	0	0	0	0	0	0	0	0	0	0	0	1	1	0	0	0	0	0	0	0	0	0	0	0	0	0	0	0
OTU_24847	Eukaryota	Alveolata	Ciliophora	Spirotrichea	Choreotrichia	Dictyocystidae	Codonellopsis	Codonellopsis_nipponica	0	0	0	0	0	0	0	0	0	0	0	0	0	0	0	0	0	0	0	0	0	0	0	0	0	1	0	0	0	0	0	0	0	0
OTU_24873	Eukaryota	Alveolata	Ciliophora	Spirotrichea	Choreotrichia	Dictyocystidae	Codonellopsis	Codonellopsis_nipponica	0	0	0	0	0	0	1	0	0	0	0	0	0	0	0	0	0	0	1	0	0	0	0	0	0	0	0	0	0	0	0	0	0	0
OTU_24888	Eukaryota	Alveolata	Ciliophora	Spirotrichea	Choreotrichia	Dictyocystidae	Codonellopsis	Codonellopsis_nipponica	0	0	0	0	0	0	0	0	0	0	0	0	0	0	0	0	2	0	0	0	0	0	0	0	0	0	0	0	0	0	0	0	0	0
OTU_24942	Eukaryota	Alveolata	Ciliophora	Spirotrichea	Choreotrichia	Dictyocystidae	Codonellopsis	Codonellopsis_nipponica	0	0	0	0	0	0	0	0	0	0	0	0	0	0	0	0	0	1	0	0	0	0	0	0	2	0	0	0	0	0	0	0	0	0
OTU_24964	Eukaryota	Alveolata	Ciliophora	Spirotrichea	Choreotrichia	Dictyocystidae	Codonellopsis	Codonellopsis_nipponica	0	0	0	0	0	0	0	0	0	0	0	0	0	0	0	0	0	1	0	0	0	0	0	0	0	0	0	0	0	0	0	0	0	0
OTU_24992	Eukaryota	Alveolata	Ciliophora	Spirotrichea	Choreotrichia	Dictyocystidae	Codonellopsis	Codonellopsis_nipponica	0	0	0	0	0	0	0	0	0	0	0	0	0	0	0	0	1	0	1	0	0	0	0	0	0	0	0	0	0	0	0	0	0	0
OTU_25067	Eukaryota	Alveolata	Ciliophora	Spirotrichea	Choreotrichia	Dictyocystidae	Codonellopsis	Codonellopsis_nipponica	0	0	0	0	0	1	0	0	0	0	0	0	0	0	0	0	0	0	1	0	0	0	0	0	0	0	0	0	0	0	0	0	0	0
OTU_25131	Eukaryota	Alveolata	Ciliophora	Spirotrichea	Choreotrichia	Dictyocystidae	Codonellopsis	Codonellopsis_nipponica	0	0	0	0	0	0	0	0	0	0	0	0	0	0	0	0	1	0	0	0	0	0	0	0	0	0	0	0	0	0	0	0	0	0
OTU_25133	Eukaryota	Alveolata	Ciliophora	Spirotrichea	Choreotrichia	Dictyocystidae	Codonellopsis	Codonellopsis_nipponica	0	0	0	0	0	1	1	0	0	0	1	0	0	0	0	0	1	0	1	0	0	0	0	0	0	0	0	0	0	0	0	0	0	0
OTU_25186	Eukaryota	Alveolata	Ciliophora	Spirotrichea	Choreotrichia	Dictyocystidae	Codonellopsis	Codonellopsis_nipponica	0	0	0	0	0	0	0	0	0	0	0	0	0	0	0	0	1	0	0	0	0	0	0	0	0	0	0	0	0	0	0	0	0	0
OTU_25268	Eukaryota	Alveolata	Ciliophora	Spirotrichea	Choreotrichia	Dictyocystidae	Codonellopsis	Codonellopsis_nipponica	0	0	0	0	0	1	0	0	0	0	0	0	0	0	0	0	0	0	1	0	0	0	0	0	0	0	0	0	0	0	0	0	0	0
OTU_25325	Eukaryota	Alveolata	Ciliophora	Spirotrichea	Choreotrichia	Dictyocystidae	Codonellopsis	Codonellopsis_nipponica	0	0	0	0	0	0	0	0	0	0	0	0	0	0	0	0	0	1	0	0	0	0	0	0	0	0	0	0	0	0	0	0	0	0
OTU_25465	Eukaryota	Alveolata	Ciliophora	Spirotrichea	Choreotrichia	Dictyocystidae	Codonellopsis	Codonellopsis_nipponica	0	0	0	0	0	0	0	0	0	0	1	0	0	0	0	0	0	0	0	0	0	0	0	0	0	0	0	0	0	0	0	0	0	0
OTU_25468	Eukaryota	Alveolata	Ciliophora	Spirotrichea	Choreotrichia	Dictyocystidae	Codonellopsis	Codonellopsis_nipponica	0	0	0	0	0	0	0	0	0	1	0	0	0	0	0	0	1	0	0	0	0	0	0	0	0	0	0	0	0	0	0	0	0	0
OTU_25482	Eukaryota	Alveolata	Ciliophora	Spirotrichea	Choreotrichia	Dictyocystidae	Codonellopsis	Codonellopsis_nipponica	0	0	0	0	0	1	1	0	0	0	1	0	0	0	0	0	0	1	1	0	0	0	0	0	0	0	0	0	0	0	0	0	0	0
OTU_25552	Eukaryota	Alveolata	Ciliophora	Spirotrichea	Choreotrichia	Multi-affiliation	Multi-affiliation	Multi-affiliation	1	0	0	0	0	0	1	0	0	0	0	0	0	0	0	0	0	0	0	0	0	0	0	0	0	0	0	0	0	0	0	0	0	0
OTU_25590	Eukaryota	Alveolata	Ciliophora	Spirotrichea	Choreotrichia	Dictyocystidae	Codonellopsis	Codonellopsis_nipponica	0	0	0	0	0	0	0	0	0	0	0	0	0	0	0	0	3	2	0	0	0	0	0	0	0	0	0	0	0	0	0	0	0	0
OTU_25615	Eukaryota	Alveolata	Ciliophora	Spirotrichea	Choreotrichia	Dictyocystidae	Codonellopsis	Codonellopsis_nipponica	0	0	0	0	0	0	0	0	0	0	0	0	0	0	0	0	0	0	0	0	0	0	0	0	0	1	0	0	0	0	0	0	0	0
OTU_25639	Eukaryota	Alveolata	Ciliophora	Spirotrichea	Choreotrichia	Dictyocystidae	Codonellopsis	Codonellopsis_nipponica	0	0	0	0	0	0	0	0	0	0	0	0	0	0	0	0	0	0	0	0	0	0	0	0	0	2	0	0	0	0	0	0	0	0
OTU_25695	Eukaryota	Alveolata	Ciliophora	Spirotrichea	Choreotrichia	Dictyocystidae	Codonellopsis	Codonellopsis_nipponica	0	0	0	0	0	0	1	0	0	0	0	0	0	0	0	0	0	0	1	0	0	0	0	0	0	0	0	0	0	0	0	0	0	0
OTU_25730	Eukaryota	Alveolata	Ciliophora	Spirotrichea	Choreotrichia	Dictyocystidae	Codonellopsis	Codonellopsis_nipponica	0	0	0	0	0	0	1	0	0	0	0	0	0	0	0	0	0	2	0	0	0	0	0	0	0	0	1	0	0	0	0	0	0	0
OTU_25734	Eukaryota	Alveolata	Ciliophora	Spirotrichea	Choreotrichia	Dictyocystidae	Codonellopsis	Codonellopsis_nipponica	1	0	0	0	0	0	0	0	0	0	0	0	0	0	0	0	0	0	1	0	0	0	0	0	0	0	0	0	0	0	0	0	0	0
OTU_25788	Eukaryota	Alveolata	Ciliophora	Spirotrichea	Choreotrichia	Dictyocystidae	Codonellopsis	Codonellopsis_nipponica	0	0	0	0	0	0	0	0	0	0	0	0	0	0	0	0	0	0	0	0	0	0	0	0	0	1	0	0	0	0	0	0	0	0
OTU_25835	Eukaryota	Alveolata	Ciliophora	Spirotrichea	Choreotrichia	Dictyocystidae	Codonellopsis	Codonellopsis_nipponica	0	0	0	0	0	0	0	0	0	0	1	0	0	0	0	0	0	0	0	0	0	0	0	0	0	0	0	0	0	0	0	0	0	0
OTU_25870	Eukaryota	Alveolata	Ciliophora	Spirotrichea	Choreotrichia	Dictyocystidae	Codonellopsis	Codonellopsis_nipponica	0	0	0	0	0	0	0	0	0	0	0	0	0	0	0	0	1	2	1	0	0	0	0	0	0	1	0	0	0	0	0	0	0	0
OTU_25904	Eukaryota	Alveolata	Ciliophora	Spirotrichea	Choreotrichia	Dictyocystidae	Codonellopsis	Codonellopsis_nipponica	0	0	0	0	0	0	0	0	0	0	0	0	0	0	0	0	0	1	0	0	0	0	0	0	0	0	0	0	0	0	0	0	0	0
OTU_25961	Eukaryota	Alveolata	Ciliophora	Spirotrichea	Choreotrichia	Dictyocystidae	Codonellopsis	Codonellopsis_nipponica	0	0	0	0	0	0	0	0	0	0	0	0	0	0	0	0	1	1	0	0	0	0	0	0	0	0	0	0	0	0	0	0	0	0
OTU_26011	Eukaryota	Alveolata	Ciliophora	Spirotrichea	Choreotrichia	Dictyocystidae	Codonellopsis	Codonellopsis_nipponica	0	0	0	0	0	0	0	0	0	0	0	0	0	0	0	0	1	0	0	0	0	0	0	0	0	1	0	0	0	0	0	0	0	0
OTU_26036	Eukaryota	Alveolata	Ciliophora	Spirotrichea	Choreotrichia	Multi-affiliation	Multi-affiliation	Multi-affiliation	0	0	0	0	0	0	0	0	0	0	0	0	0	0	0	0	0	0	1	0	0	0	0	0	0	0	0	0	0	0	0	0	0	0
OTU_26051	Eukaryota	Alveolata	Ciliophora	Spirotrichea	Choreotrichia	Dictyocystidae	Codonellopsis	Codonellopsis_nipponica	0	0	0	0	0	0	0	0	0	0	0	0	0	0	0	0	0	0	2	0	0	0	0	0	0	0	0	0	0	0	0	0	0	0
OTU_26068	Eukaryota	Alveolata	Ciliophora	Spirotrichea	Choreotrichia	Dictyocystidae	Codonellopsis	Codonellopsis_nipponica	0	0	0	0	0	2	0	0	0	0	0	0	0	0	0	0	0	0	1	0	0	0	0	0	0	0	0	0	0	0	0	0	0	0
OTU_26075	Eukaryota	Alveolata	Ciliophora	Spirotrichea	Choreotrichia	Dictyocystidae	Codonellopsis	Codonellopsis_nipponica	0	0	0	0	0	0	1	0	0	0	0	0	0	0	0	0	0	0	0	0	0	0	0	0	0	1	0	0	0	0	0	0	0	0
OTU_26134	Eukaryota	Alveolata	Ciliophora	Spirotrichea	Choreotrichia	Dictyocystidae	Codonellopsis	Codonellopsis_nipponica	0	0	0	0	0	0	0	0	0	0	0	0	0	0	0	0	1	0	0	0	0	0	0	0	0	1	0	0	0	0	0	0	0	0
OTU_26144	Eukaryota	Alveolata	Ciliophora	Spirotrichea	Choreotrichia	Dictyocystidae	Codonellopsis	Codonellopsis_nipponica	0	0	0	0	0	0	0	0	0	0	1	0	0	0	0	0	0	0	0	0	0	0	0	0	0	0	0	0	0	0	0	0	0	0
OTU_26151	Eukaryota	Alveolata	Ciliophora	Spirotrichea	Choreotrichia	Dictyocystidae	Codonellopsis	Codonellopsis_nipponica	1	0	0	0	0	0	1	0	0	0	0	0	0	0	0	0	0	0	0	0	0	0	0	0	0	0	0	0	0	0	0	0	0	0
OTU_26183	Eukaryota	Alveolata	Ciliophora	Spirotrichea	Choreotrichia	Dictyocystidae	Codonellopsis	Codonellopsis_nipponica	0	0	0	0	0	0	0	0	0	0	0	0	0	0	0	0	1	0	1	0	0	0	0	0	0	0	0	0	0	0	0	0	0	0
OTU_26220	Eukaryota	Alveolata	Ciliophora	Spirotrichea	Choreotrichia	Dictyocystidae	Codonellopsis	Codonellopsis_nipponica	0	0	0	0	0	0	0	0	0	0	1	0	0	0	0	0	0	0	1	0	0	0	0	0	0	0	0	0	0	0	0	0	0	0
OTU_26229	Eukaryota	Alveolata	Ciliophora	Spirotrichea	Choreotrichia	Dictyocystidae	Codonellopsis	Codonellopsis_nipponica	0	0	0	0	0	0	0	0	0	0	0	0	0	0	0	0	0	0	1	0	0	0	0	0	0	0	0	0	0	0	0	0	0	0
OTU_26357	Eukaryota	Alveolata	Ciliophora	Spirotrichea	Choreotrichia	Dictyocystidae	Codonellopsis	Codonellopsis_nipponica	0	0	0	0	0	1	0	0	0	0	0	0	0	0	0	0	0	0	0	0	0	0	0	0	0	1	0	0	0	0	0	0	0	0
OTU_26395	Eukaryota	Alveolata	Ciliophora	Spirotrichea	Choreotrichia	Dictyocystidae	Codonellopsis	Codonellopsis_nipponica	0	0	0	0	0	1	1	0	0	0	0	0	0	0	0	0	1	0	0	0	0	0	0	0	0	0	0	0	0	0	0	0	0	0
OTU_26415	Eukaryota	Alveolata	Ciliophora	Spirotrichea	Choreotrichia	Dictyocystidae	Codonellopsis	Codonellopsis_nipponica	0	0	0	0	0	0	0	0	0	0	0	0	0	0	0	0	1	0	0	0	0	0	0	0	0	0	0	0	0	0	0	0	0	0
OTU_26445	Eukaryota	Alveolata	Ciliophora	Spirotrichea	Choreotrichia	Dictyocystidae	Codonellopsis	Codonellopsis_nipponica	0	0	0	0	0	0	0	0	0	0	0	0	0	0	0	0	0	0	2	0	0	0	0	0	0	0	0	0	0	0	0	0	0	0
OTU_26454	Eukaryota	Alveolata	Ciliophora	Spirotrichea	Choreotrichia	Dictyocystidae	Codonellopsis	Codonellopsis_nipponica	0	0	0	0	0	0	0	0	0	0	0	0	0	0	0	0	1	0	0	0	0	0	0	0	0	1	0	0	0	0	0	0	0	0
OTU_26485	Eukaryota	Alveolata	Ciliophora	Spirotrichea	Choreotrichia	Dictyocystidae	Codonellopsis	Codonellopsis_nipponica	0	0	0	0	0	0	0	0	0	0	0	0	0	0	0	0	1	0	0	0	0	0	0	0	0	1	0	0	0	0	0	0	0	0
OTU_26492	Eukaryota	Alveolata	Ciliophora	Spirotrichea	Choreotrichia	Dictyocystidae	Codonellopsis	Codonellopsis_nipponica	0	0	0	0	0	0	0	0	0	0	0	0	0	0	0	0	1	0	1	0	0	0	0	0	0	0	0	0	0	0	0	0	0	0
OTU_26502	Eukaryota	Alveolata	Ciliophora	Spirotrichea	Choreotrichia	Dictyocystidae	Codonellopsis	Codonellopsis_nipponica	0	0	0	0	0	0	1	0	0	0	0	0	0	0	0	0	1	0	0	0	0	0	0	0	0	0	0	0	0	0	0	0	0	0
OTU_26528	Eukaryota	Alveolata	Ciliophora	Spirotrichea	Choreotrichia	Dictyocystidae	Codonellopsis	Codonellopsis_nipponica	0	0	0	0	0	0	0	0	0	0	1	0	0	0	0	0	0	0	1	0	0	0	0	0	0	0	0	0	0	0	0	0	0	0
OTU_26531	Eukaryota	Alveolata	Ciliophora	Spirotrichea	Choreotrichia	Dictyocystidae	Codonellopsis	Codonellopsis_nipponica	0	0	0	0	0	1	0	0	0	0	0	0	0	0	0	0	0	0	0	0	0	0	0	0	0	0	0	0	0	0	0	0	0	0
OTU_26553	Eukaryota	Alveolata	Ciliophora	Spirotrichea	Choreotrichia	Dictyocystidae	Codonellopsis	Codonellopsis_nipponica	0	0	0	0	0	0	0	0	0	0	1	0	0	0	0	0	0	0	1	0	0	0	0	0	0	0	0	0	0	0	0	0	0	0
OTU_26566	Eukaryota	Alveolata	Ciliophora	Spirotrichea	Choreotrichia	Dictyocystidae	Codonellopsis	Codonellopsis_nipponica	0	0	0	0	0	0	0	0	0	0	0	0	0	0	0	0	1	0	1	0	0	0	0	0	0	0	0	0	0	0	0	0	0	0
OTU_26567	Eukaryota	Alveolata	Ciliophora	Spirotrichea	Choreotrichia	Dictyocystidae	Codonellopsis	Codonellopsis_nipponica	0	0	0	0	0	0	0	0	0	0	0	0	0	0	0	0	0	0	2	0	0	0	0	0	0	0	0	0	0	0	0	0	0	0
OTU_26571	Eukaryota	Alveolata	Ciliophora	Spirotrichea	Choreotrichia	Dictyocystidae	Codonellopsis	Codonellopsis_nipponica	0	0	0	0	0	1	0	0	0	0	1	0	0	0	0	0	0	0	0	0	0	0	0	0	0	0	0	0	0	0	0	0	0	0
OTU_26596	Eukaryota	Alveolata	Ciliophora	Spirotrichea	Choreotrichia	Dictyocystidae	Codonellopsis	Codonellopsis_nipponica	0	0	0	0	0	0	0	0	0	0	0	0	0	0	0	0	1	0	0	0	0	0	0	0	0	0	0	0	0	0	0	0	0	0
OTU_26606	Eukaryota	Alveolata	Ciliophora	Spirotrichea	Choreotrichia	Dictyocystidae	Codonellopsis	Codonellopsis_nipponica	0	0	0	0	0	0	0	0	0	0	0	0	0	0	0	0	0	0	1	0	0	0	0	0	0	0	0	0	0	0	0	0	0	0
OTU_26613	Eukaryota	Alveolata	Ciliophora	Spirotrichea	Choreotrichia	Dictyocystidae	Codonellopsis	Codonellopsis_nipponica	0	0	0	0	0	0	0	0	0	0	0	0	0	0	0	0	1	0	0	0	0	0	0	0	0	1	0	0	0	0	0	0	0	0
OTU_26620	Eukaryota	Alveolata	Ciliophora	Spirotrichea	Choreotrichia	Dictyocystidae	Codonellopsis	Codonellopsis_nipponica	0	0	0	0	0	0	0	0	0	0	1	0	0	0	0	0	1	0	0	0	0	0	0	0	0	0	0	0	0	0	0	0	0	0
OTU_26622	Eukaryota	Alveolata	Ciliophora	Spirotrichea	Choreotrichia	Dictyocystidae	Codonellopsis	Codonellopsis_nipponica	0	0	0	0	0	0	0	0	0	0	0	0	0	0	0	0	0	1	0	0	0	0	0	0	1	0	0	0	0	0	0	0	0	0
OTU_26659	Eukaryota	Alveolata	Ciliophora	Spirotrichea	Choreotrichia	Dictyocystidae	Codonellopsis	Codonellopsis_nipponica	0	0	0	0	0	0	0	0	0	0	0	0	0	0	0	0	1	0	1	0	0	0	0	0	0	0	0	0	0	0	0	0	0	0
OTU_26661	Eukaryota	Alveolata	Ciliophora	Spirotrichea	Choreotrichia	Dictyocystidae	Codonellopsis	Codonellopsis_nipponica	0	0	0	0	0	0	0	0	0	0	0	0	0	0	0	0	0	1	1	0	0	0	0	0	0	0	0	0	0	0	0	0	0	0
OTU_26664	Eukaryota	Alveolata	Ciliophora	Spirotrichea	Choreotrichia	Dictyocystidae	Codonellopsis	Codonellopsis_nipponica	0	0	0	0	0	0	1	0	0	0	0	0	0	0	0	0	0	0	0	0	0	0	0	0	0	0	0	0	0	0	0	0	0	0
OTU_26672	Eukaryota	Alveolata	Ciliophora	Spirotrichea	Choreotrichia	Dictyocystidae	Codonellopsis	Codonellopsis_nipponica	0	0	0	0	0	0	0	0	0	0	0	0	0	0	0	0	1	0	1	0	0	0	0	0	0	0	0	0	0	0	0	0	0	0
OTU_26677	Eukaryota	Alveolata	Ciliophora	Spirotrichea	Choreotrichia	Dictyocystidae	Codonellopsis	Codonellopsis_nipponica	0	0	0	0	0	0	0	0	0	0	0	0	0	0	0	0	0	0	1	0	0	0	0	0	0	0	0	0	0	0	0	0	0	0
OTU_26685	Eukaryota	Alveolata	Ciliophora	Spirotrichea	Choreotrichia	Dictyocystidae	Codonellopsis	Codonellopsis_nipponica	0	0	0	0	0	1	0	0	0	0	0	0	0	0	0	0	0	0	0	0	0	0	0	0	0	0	0	0	0	0	0	0	0	0
OTU_26689	Eukaryota	Alveolata	Ciliophora	Spirotrichea	Choreotrichia	Dictyocystidae	Codonellopsis	Codonellopsis_nipponica	0	0	0	0	0	0	0	0	0	0	1	0	0	0	0	0	1	0	0	0	0	0	0	0	0	0	0	0	0	0	0	0	0	0
OTU_26692	Eukaryota	Alveolata	Ciliophora	Spirotrichea	Choreotrichia	Dictyocystidae	Codonellopsis	Codonellopsis_nipponica	0	0	0	0	0	0	0	0	0	0	0	0	0	0	0	0	2	0	1	0	0	0	0	0	0	0	0	0	0	0	0	0	0	0
OTU_26700	Eukaryota	Alveolata	Ciliophora	Spirotrichea	Choreotrichia	Dictyocystidae	Codonellopsis	Codonellopsis_nipponica	0	0	0	0	0	0	0	0	0	0	0	0	0	0	0	0	0	0	1	0	0	0	0	0	0	0	0	0	0	0	0	0	0	0
OTU_26707	Eukaryota	Alveolata	Ciliophora	Spirotrichea	Choreotrichia	Dictyocystidae	Codonellopsis	Codonellopsis_nipponica	0	0	0	0	0	0	0	0	0	0	0	0	0	0	0	0	0	0	1	0	0	0	0	0	0	1	0	0	0	0	0	0	0	0
OTU_26725	Eukaryota	Alveolata	Ciliophora	Spirotrichea	Choreotrichia	Dictyocystidae	Codonellopsis	Codonellopsis_nipponica	0	0	0	0	0	0	1	0	0	0	0	0	0	0	0	0	0	0	1	0	0	0	0	0	0	0	0	0	0	0	0	0	0	0
OTU_26733	Eukaryota	Alveolata	Ciliophora	Spirotrichea	Choreotrichia	Dictyocystidae	Codonellopsis	Codonellopsis_nipponica	0	0	0	0	0	0	0	0	0	0	0	0	0	0	0	0	0	0	2	0	0	0	0	0	0	0	0	0	0	0	0	0	0	0
OTU_26739	Eukaryota	Alveolata	Ciliophora	Spirotrichea	Choreotrichia	Dictyocystidae	Codonellopsis	Codonellopsis_nipponica	0	0	0	0	0	0	1	0	0	0	1	0	0	0	0	0	0	0	0	0	0	0	0	0	0	0	0	0	0	0	0	0	0	0
OTU_26794	Eukaryota	Alveolata	Ciliophora	Spirotrichea	Choreotrichia	Dictyocystidae	Codonellopsis	Codonellopsis_nipponica	0	0	0	0	0	0	0	0	0	0	0	0	0	0	0	0	0	0	2	0	0	0	0	0	0	0	0	0	0	0	0	0	0	0
OTU_26841	Eukaryota	Alveolata	Ciliophora	Spirotrichea	Choreotrichia	Dictyocystidae	Codonellopsis	Codonellopsis_nipponica	0	0	0	0	0	0	1	0	0	0	0	0	0	0	0	0	0	1	0	0	0	0	0	0	0	0	0	0	0	0	0	0	0	0
OTU_26848	Eukaryota	Alveolata	Ciliophora	Spirotrichea	Choreotrichia	Dictyocystidae	Codonellopsis	Codonellopsis_nipponica	0	0	0	0	0	0	0	0	0	0	0	0	0	0	0	0	1	1	0	0	0	0	0	0	0	0	0	0	0	0	0	0	0	0
OTU_26851	Eukaryota	Alveolata	Ciliophora	Spirotrichea	Choreotrichia	Dictyocystidae	Codonellopsis	Codonellopsis_nipponica	0	0	0	0	0	0	0	0	0	0	0	0	0	0	0	0	0	2	0	0	0	0	0	0	0	0	0	0	0	0	0	0	0	0
OTU_26853	Eukaryota	Alveolata	Ciliophora	Spirotrichea	Choreotrichia	Dictyocystidae	Codonellopsis	Codonellopsis_nipponica	0	0	0	0	0	0	0	0	0	0	0	0	0	0	0	0	0	0	2	0	0	0	0	0	0	0	0	0	0	0	0	0	0	0
OTU_26854	Eukaryota	Alveolata	Ciliophora	Spirotrichea	Choreotrichia	Dictyocystidae	Codonellopsis	Codonellopsis_nipponica	0	0	0	0	0	0	1	0	0	0	0	0	0	0	0	0	1	0	0	0	0	0	0	0	0	0	0	0	0	0	0	0	0	0
OTU_26862	Eukaryota	Alveolata	Ciliophora	Spirotrichea	Choreotrichia	Dictyocystidae	Codonellopsis	Codonellopsis_nipponica	0	0	0	0	0	0	0	0	0	0	0	0	0	0	0	0	0	2	0	0	0	0	0	0	0	0	0	0	0	0	0	0	0	0
OTU_26863	Eukaryota	Alveolata	Ciliophora	Spirotrichea	Choreotrichia	Dictyocystidae	Codonellopsis	Codonellopsis_nipponica	0	0	0	0	0	0	1	0	0	0	1	0	0	0	0	0	0	0	0	0	0	0	0	0	0	0	0	0	0	0	0	0	0	0
OTU_26886	Eukaryota	Alveolata	Ciliophora	Spirotrichea	Choreotrichia	Dictyocystidae	Codonellopsis	Codonellopsis_nipponica	0	0	0	0	0	0	0	0	0	0	1	0	0	0	0	0	0	0	0	0	0	0	0	0	1	0	0	0	0	0	0	0	0	0
OTU_26917	Eukaryota	Alveolata	Ciliophora	Spirotrichea	Choreotrichia	Dictyocystidae	Codonellopsis	Codonellopsis_nipponica	0	0	0	0	0	0	0	0	0	0	0	0	0	0	0	0	2	0	0	0	0	0	0	0	0	0	0	0	0	0	0	0	0	0
OTU_26921	Eukaryota	Alveolata	Ciliophora	Spirotrichea	Choreotrichia	Dictyocystidae	Codonellopsis	Codonellopsis_nipponica	0	0	0	0	0	0	0	0	0	0	0	0	0	0	0	0	2	2	1	0	0	0	0	0	0	0	0	0	0	0	0	0	0	0
OTU_27018	Eukaryota	Alveolata	Ciliophora	Spirotrichea	Choreotrichia	Multi-affiliation	Multi-affiliation	Multi-affiliation	1	0	0	0	0	0	0	0	0	0	0	0	0	0	0	0	0	0	1	0	0	0	0	0	0	0	0	0	0	0	0	0	0	0
OTU_27039	Eukaryota	Alveolata	Ciliophora	Spirotrichea	Choreotrichia	Dictyocystidae	Codonellopsis	Codonellopsis_nipponica	0	0	0	0	0	0	0	0	0	0	0	0	0	0	0	0	0	1	0	0	0	0	0	0	0	1	0	0	0	0	0	0	0	0
OTU_27069	Eukaryota	Alveolata	Ciliophora	Spirotrichea	Choreotrichia	Dictyocystidae	Codonellopsis	Codonellopsis_nipponica	0	0	0	0	0	0	0	0	0	0	0	0	0	0	0	0	0	1	1	0	0	0	0	0	0	0	0	0	0	0	0	0	0	0
OTU_27082	Eukaryota	Alveolata	Ciliophora	Spirotrichea	Choreotrichia	Dictyocystidae	Codonellopsis	Codonellopsis_nipponica	0	0	0	0	0	0	1	0	0	0	0	0	0	0	0	0	0	0	1	0	0	0	0	0	0	0	0	0	0	0	0	0	0	0
OTU_27137	Eukaryota	Alveolata	Ciliophora	Spirotrichea	Choreotrichia	Dictyocystidae	Codonellopsis	Codonellopsis_nipponica	0	0	0	0	0	0	2	0	0	0	0	0	0	0	0	0	0	0	0	0	0	0	0	0	0	0	0	0	0	0	0	0	0	0
OTU_27140	Eukaryota	Alveolata	Ciliophora	Spirotrichea	Choreotrichia	Dictyocystidae	Codonellopsis	Codonellopsis_nipponica	0	0	0	0	0	0	0	0	0	0	0	0	0	0	0	0	1	1	0	0	0	0	0	0	0	0	0	0	0	0	0	0	0	0
OTU_27203	Eukaryota	Alveolata	Ciliophora	Spirotrichea	Choreotrichia	Dictyocystidae	Codonellopsis	Codonellopsis_nipponica	0	0	0	0	0	0	0	0	0	0	0	0	0	0	0	0	0	0	2	0	0	0	0	0	0	0	0	0	0	0	0	0	0	0
OTU_27267	Eukaryota	Alveolata	Ciliophora	Spirotrichea	Choreotrichia	Dictyocystidae	Codonellopsis	Codonellopsis_nipponica	0	0	0	0	0	0	0	0	0	0	0	0	0	0	0	0	1	0	1	0	0	0	0	0	0	0	0	0	0	0	0	0	0	0
OTU_27301	Eukaryota	Alveolata	Ciliophora	Spirotrichea	Choreotrichia	Dictyocystidae	Codonellopsis	Codonellopsis_nipponica	0	0	0	0	0	0	1	0	0	0	0	0	0	0	0	0	0	0	0	0	0	0	0	0	0	0	0	0	0	0	0	0	0	0
OTU_27308	Eukaryota	Alveolata	Ciliophora	Spirotrichea	Choreotrichia	Dictyocystidae	Codonellopsis	Codonellopsis_nipponica	0	0	0	0	0	0	0	0	0	0	0	0	0	0	0	0	0	0	1	0	0	0	0	0	0	0	0	0	0	0	0	0	0	0
OTU_27340	Eukaryota	Alveolata	Ciliophora	Spirotrichea	Choreotrichia	Dictyocystidae	Codonellopsis	Codonellopsis_nipponica	0	0	0	0	0	0	0	0	0	0	0	0	0	0	0	0	0	1	0	0	0	0	0	0	0	1	0	0	0	0	0	0	0	0
OTU_27363	Eukaryota	Alveolata	Ciliophora	Spirotrichea	Choreotrichia	Dictyocystidae	Codonellopsis	Codonellopsis_nipponica	0	0	0	0	0	0	0	0	0	0	0	0	0	0	0	0	0	1	0	0	0	0	0	0	0	0	0	0	0	0	0	0	0	0
OTU_27477	Eukaryota	Alveolata	Ciliophora	Spirotrichea	Choreotrichia	Dictyocystidae	Codonellopsis	Codonellopsis_nipponica	0	0	0	0	0	0	1	0	0	0	0	0	0	0	0	0	0	0	1	0	0	0	0	0	0	1	0	0	0	0	0	0	0	0
OTU_27567	Eukaryota	Alveolata	Ciliophora	Spirotrichea	Choreotrichia	Dictyocystidae	Codonellopsis	Codonellopsis_nipponica	0	0	0	0	0	0	0	0	0	0	0	0	0	0	0	0	0	0	1	0	0	0	0	0	0	1	0	0	0	0	0	0	0	0
OTU_27724	Eukaryota	Alveolata	Ciliophora	Spirotrichea	Choreotrichia	Dictyocystidae	Codonellopsis	Codonellopsis_nipponica	0	0	0	0	0	1	0	0	0	0	0	0	0	0	0	0	0	0	0	0	0	0	0	0	0	1	0	0	0	0	0	0	0	0
OTU_27773	Eukaryota	Alveolata	Ciliophora	Spirotrichea	Choreotrichia	Dictyocystidae	Codonellopsis	Codonellopsis_nipponica	0	0	0	0	0	0	1	0	0	0	0	0	0	0	0	0	1	0	0	0	0	0	0	0	0	0	0	0	0	0	0	0	0	0
OTU_27834	Eukaryota	Alveolata	Ciliophora	Spirotrichea	Choreotrichia	Dictyocystidae	Codonellopsis	Codonellopsis_nipponica	0	0	0	0	0	0	0	0	0	1	0	0	0	0	0	0	0	2	0	0	0	0	0	0	0	0	0	0	0	0	0	0	0	0
OTU_27905	Eukaryota	Alveolata	Ciliophora	Spirotrichea	Choreotrichia	Dictyocystidae	Codonellopsis	Codonellopsis_nipponica	0	0	0	0	0	0	0	0	0	0	0	0	0	0	0	0	1	0	1	0	0	0	0	0	0	0	0	0	0	0	0	0	0	0
OTU_27911	Eukaryota	Alveolata	Ciliophora	Spirotrichea	Choreotrichia	Dictyocystidae	Codonellopsis	Codonellopsis_nipponica	0	0	0	0	0	0	0	0	0	0	0	0	0	0	0	0	1	0	0	0	0	0	0	0	0	0	0	0	0	0	0	0	0	0
OTU_27980	Eukaryota	Alveolata	Ciliophora	Spirotrichea	Choreotrichia	Dictyocystidae	Codonellopsis	Codonellopsis_nipponica	0	0	0	0	0	0	0	0	0	1	0	0	0	0	0	0	0	0	0	0	0	0	0	0	0	1	0	0	0	0	0	0	0	0
OTU_28021	Eukaryota	Alveolata	Ciliophora	Spirotrichea	Choreotrichia	Dictyocystidae	Codonellopsis	Codonellopsis_nipponica	0	0	0	0	0	0	1	0	0	0	0	0	0	0	0	0	1	0	0	0	0	0	0	0	0	0	0	0	0	0	0	0	0	0
OTU_28048	Eukaryota	Alveolata	Ciliophora	Spirotrichea	Choreotrichia	Dictyocystidae	Codonellopsis	Codonellopsis_nipponica	0	0	0	0	0	0	1	0	0	0	0	0	0	0	0	0	0	1	0	0	0	0	0	0	0	0	0	0	0	0	0	0	0	0
OTU_28124	Eukaryota	Alveolata	Ciliophora	Spirotrichea	Choreotrichia	Dictyocystidae	Codonellopsis	Codonellopsis_nipponica	0	0	0	0	0	1	1	0	0	0	0	0	0	0	0	0	0	0	1	0	0	0	0	0	0	0	0	0	0	0	0	0	0	0
OTU_28131	Eukaryota	Alveolata	Ciliophora	Spirotrichea	Choreotrichia	Dictyocystidae	Codonellopsis	Codonellopsis_nipponica	0	0	0	0	0	0	1	0	0	0	0	0	0	0	0	0	0	0	1	0	0	0	0	0	0	0	0	0	0	0	0	0	0	0
OTU_28331	Eukaryota	Alveolata	Ciliophora	Spirotrichea	Choreotrichia	Dictyocystidae	Codonellopsis	Codonellopsis_nipponica	0	0	0	0	0	0	0	0	0	0	0	0	0	0	0	0	0	1	1	0	0	0	0	0	0	0	0	0	0	0	0	0	0	0
OTU_28370	Eukaryota	Alveolata	Ciliophora	Spirotrichea	Choreotrichia	Dictyocystidae	Codonellopsis	Codonellopsis_nipponica	0	0	0	0	0	0	0	0	0	0	0	0	0	0	0	0	1	0	1	0	0	0	0	0	0	0	0	0	0	0	0	0	0	0
OTU_28386	Eukaryota	Alveolata	Ciliophora	Spirotrichea	Choreotrichia	Dictyocystidae	Codonellopsis	Codonellopsis_nipponica	0	0	0	0	0	0	0	0	0	0	0	0	0	0	0	0	0	0	0	0	0	0	0	0	0	2	0	0	0	0	0	0	0	0
OTU_28490	Eukaryota	Alveolata	Ciliophora	Spirotrichea	Choreotrichia	Dictyocystidae	Codonellopsis	Codonellopsis_nipponica	0	0	0	0	0	0	1	0	0	0	0	0	0	0	0	0	1	0	0	0	0	0	0	0	0	0	0	0	0	0	0	0	0	0
OTU_28631	Eukaryota	Alveolata	Ciliophora	Spirotrichea	Choreotrichia	Dictyocystidae	Codonellopsis	Codonellopsis_nipponica	0	0	0	0	0	0	0	0	0	0	1	0	0	0	0	0	0	0	0	0	0	0	0	0	0	0	0	0	0	0	0	0	0	0
OTU_28687	Eukaryota	Alveolata	Ciliophora	Spirotrichea	Choreotrichia	Dictyocystidae	Codonellopsis	Codonellopsis_nipponica	0	0	0	0	0	0	0	0	0	0	1	0	0	0	0	0	1	0	0	0	0	0	0	0	0	0	0	0	0	0	0	0	0	0
OTU_28688	Eukaryota	Alveolata	Ciliophora	Spirotrichea	Choreotrichia	Dictyocystidae	Codonellopsis	Codonellopsis_nipponica	0	0	0	0	0	0	0	0	0	0	0	0	0	0	0	0	0	1	1	0	0	0	0	0	0	0	0	0	0	0	0	0	0	0
OTU_28759	Eukaryota	Alveolata	Ciliophora	Spirotrichea	Choreotrichia	Dictyocystidae	Codonellopsis	Codonellopsis_nipponica	0	0	0	0	0	0	0	0	0	0	0	0	0	0	0	0	1	0	0	0	0	0	0	0	0	0	0	0	0	0	0	0	0	0
OTU_28813	Eukaryota	Alveolata	Ciliophora	Spirotrichea	Choreotrichia	Multi-affiliation	Multi-affiliation	Multi-affiliation	0	0	0	0	0	0	0	0	0	0	0	0	0	0	0	0	1	0	0	0	0	0	0	0	0	0	0	0	0	0	0	0	0	0
OTU_28951	Eukaryota	Alveolata	Ciliophora	Spirotrichea	Choreotrichia	Dictyocystidae	Codonellopsis	Codonellopsis_nipponica	0	0	0	0	0	0	1	0	0	0	0	0	0	0	0	0	0	1	0	0	0	0	0	0	0	0	0	0	0	0	0	0	0	0
OTU_28965	Eukaryota	Alveolata	Ciliophora	Spirotrichea	Choreotrichia	Dictyocystidae	Codonellopsis	Codonellopsis_nipponica	0	0	0	0	0	0	0	0	0	0	0	0	0	0	0	0	0	0	1	0	0	0	0	0	0	0	0	0	0	0	0	0	0	0
OTU_29093	Eukaryota	Alveolata	Ciliophora	Spirotrichea	Choreotrichia	Dictyocystidae	Codonellopsis	Codonellopsis_nipponica	0	0	0	0	0	0	1	0	0	0	0	0	0	0	0	0	0	0	2	0	0	0	0	0	0	0	0	0	0	0	0	0	0	0
OTU_29242	Eukaryota	Alveolata	Ciliophora	Spirotrichea	Choreotrichia	Dictyocystidae	Codonellopsis	Codonellopsis_nipponica	0	0	0	0	0	0	0	0	0	0	0	0	0	0	0	0	0	0	1	0	0	0	0	0	0	0	0	0	0	0	0	0	0	0
OTU_29353	Eukaryota	Alveolata	Ciliophora	Spirotrichea	Choreotrichia	Dictyocystidae	Codonellopsis	Codonellopsis_nipponica	0	0	0	0	0	0	0	0	0	0	0	0	0	0	0	0	2	0	0	0	0	0	0	0	0	0	0	0	0	0	0	0	0	0
OTU_29434	Eukaryota	Alveolata	Ciliophora	Spirotrichea	Choreotrichia	Dictyocystidae	Codonellopsis	Codonellopsis_nipponica	0	0	0	0	0	0	0	0	0	0	0	0	0	0	0	0	0	1	1	0	0	0	0	0	0	0	0	0	0	0	0	0	0	0
OTU_29541	Eukaryota	Alveolata	Ciliophora	Spirotrichea	Choreotrichia	Dictyocystidae	Codonellopsis	Codonellopsis_nipponica	0	0	0	0	0	0	0	0	0	0	0	0	0	0	0	0	1	1	0	0	0	0	0	0	0	0	0	0	0	0	0	0	0	0
OTU_29554	Eukaryota	Alveolata	Ciliophora	Spirotrichea	Choreotrichia	Dictyocystidae	Codonellopsis	Codonellopsis_nipponica	1	0	0	0	0	0	0	0	0	0	0	0	0	0	0	0	0	1	0	0	0	0	0	0	0	0	0	0	0	0	0	0	0	0
OTU_29769	Eukaryota	Alveolata	Ciliophora	Spirotrichea	Choreotrichia	Dictyocystidae	Codonellopsis	Codonellopsis_nipponica	0	0	0	0	0	0	0	0	0	0	0	0	0	0	0	0	0	1	1	0	0	0	0	0	0	0	0	0	0	0	0	0	0	0
OTU_29802	Eukaryota	Alveolata	Ciliophora	Spirotrichea	Choreotrichia	Dictyocystidae	Codonellopsis	Codonellopsis_nipponica	0	0	0	0	0	0	0	0	0	0	0	0	0	0	0	0	1	0	1	0	0	0	0	0	0	1	0	0	0	0	0	0	0	0
OTU_29808	Eukaryota	Alveolata	Ciliophora	Spirotrichea	Choreotrichia	Dictyocystidae	Codonellopsis	Codonellopsis_nipponica	0	0	0	0	0	0	0	0	0	0	1	0	0	0	0	0	0	1	0	0	0	0	0	0	0	0	0	0	0	0	0	0	0	0
OTU_29857	Eukaryota	Alveolata	Ciliophora	Spirotrichea	Choreotrichia	Dictyocystidae	Codonellopsis	Codonellopsis_nipponica	0	0	0	0	0	0	1	0	0	0	0	0	0	0	0	0	0	0	0	0	0	0	0	0	0	0	0	0	0	0	0	0	0	0
OTU_29891	Eukaryota	Alveolata	Ciliophora	Spirotrichea	Choreotrichia	Dictyocystidae	Codonellopsis	Codonellopsis_nipponica	0	0	0	0	0	0	0	0	0	0	0	0	0	0	0	0	1	0	0	0	0	0	0	0	0	0	0	0	0	0	0	0	0	0
OTU_29898	Eukaryota	Alveolata	Ciliophora	Spirotrichea	Choreotrichia	Dictyocystidae	Codonellopsis	Codonellopsis_nipponica	0	0	0	0	0	0	0	0	0	0	1	0	0	0	0	0	1	0	0	0	0	0	0	0	0	0	0	0	0	0	0	0	0	0
OTU_29921	Eukaryota	Alveolata	Ciliophora	Spirotrichea	Choreotrichia	Dictyocystidae	Codonellopsis	Codonellopsis_nipponica	0	0	0	0	0	0	0	0	0	0	0	0	0	0	0	0	1	0	0	0	0	0	0	0	0	0	0	0	0	0	0	0	0	0
OTU_29943	Eukaryota	Alveolata	Ciliophora	Spirotrichea	Choreotrichia	Dictyocystidae	Codonellopsis	Codonellopsis_nipponica	0	0	0	0	0	0	0	0	0	0	0	0	0	0	0	0	1	0	0	0	0	0	0	0	0	0	0	0	0	0	0	0	0	0
OTU_30382	Eukaryota	Alveolata	Ciliophora	Spirotrichea	Choreotrichia	Dictyocystidae	Codonellopsis	Codonellopsis_nipponica	0	0	0	0	0	0	0	0	0	0	0	0	0	0	0	0	0	0	1	0	0	0	0	0	0	1	0	0	0	0	0	0	0	0
OTU_30388	Eukaryota	Alveolata	Ciliophora	Spirotrichea	Choreotrichia	Dictyocystidae	Codonellopsis	Codonellopsis_nipponica	0	0	0	0	0	0	0	0	0	0	0	0	0	0	0	0	1	0	0	0	0	0	0	0	0	0	0	0	0	0	0	0	0	0
OTU_30544	Eukaryota	Multi-affiliation	Multi-affiliation	Multi-affiliation	Multi-affiliation	Multi-affiliation	Multi-affiliation	Multi-affiliation	0	0	0	0	0	0	0	0	0	0	0	0	0	0	0	0	0	0	0	0	0	0	0	0	0	0	0	0	0	2	0	0	0	0
OTU_30562	Eukaryota	Alveolata	Ciliophora	Spirotrichea	Choreotrichia	Dictyocystidae	Codonellopsis	Codonellopsis_nipponica	0	0	0	0	0	0	0	0	0	0	0	0	0	0	0	0	0	0	0	0	0	0	0	0	0	1	0	0	0	0	0	0	0	0
OTU_30566	Eukaryota	Alveolata	Ciliophora	Spirotrichea	Choreotrichia	Multi-affiliation	Multi-affiliation	Multi-affiliation	0	0	0	0	0	0	0	0	0	0	0	0	0	0	0	0	1	0	1	0	0	0	0	0	0	0	0	0	0	0	0	0	0	0
OTU_30834	Eukaryota	Alveolata	Ciliophora	Spirotrichea	Choreotrichia	Dictyocystidae	Codonellopsis	Codonellopsis_nipponica	0	0	0	0	0	0	0	0	0	0	0	0	0	0	0	0	0	0	2	0	0	0	0	0	0	0	0	0	0	0	0	0	0	0
OTU_30916	Eukaryota	Alveolata	Ciliophora	Spirotrichea	Choreotrichia	Dictyocystidae	Codonellopsis	Codonellopsis_nipponica	0	0	0	0	0	0	0	0	0	0	0	0	0	0	0	0	1	0	1	0	0	0	0	0	0	0	0	0	0	0	0	0	0	0
OTU_31010	Eukaryota	Alveolata	Ciliophora	Spirotrichea	Choreotrichia	Dictyocystidae	Codonellopsis	Codonellopsis_nipponica	0	0	0	0	0	0	0	0	0	0	0	0	0	0	0	0	1	0	0	0	0	0	0	0	0	0	0	0	0	0	0	0	0	0
OTU_31034	Eukaryota	Alveolata	Dinophyta	Syndiniales	Dino-Group-II	Dino-Group-II-Clade-32	Dino-Group-II-Clade-32_X	Multi-affiliation	0	0	0	0	0	0	0	1	0	0	0	0	0	0	0	0	0	0	0	0	0	0	0	0	0	0	0	0	0	0	0	0	0	0
OTU_31367	Eukaryota	Alveolata	Ciliophora	Spirotrichea	Choreotrichia	Dictyocystidae	Codonellopsis	Codonellopsis_nipponica	0	0	0	0	0	0	1	0	0	0	0	0	0	0	0	0	0	0	0	0	0	0	0	0	0	0	0	0	0	0	0	0	0	0
OTU_31407	Eukaryota	Alveolata	Ciliophora	Spirotrichea	Choreotrichia	Dictyocystidae	Codonellopsis	Codonellopsis_nipponica	0	0	0	0	0	0	0	0	0	0	0	0	0	0	0	0	1	0	0	0	0	0	0	0	0	0	0	0	0	0	0	0	0	0
OTU_31420	Eukaryota	Alveolata	Ciliophora	Spirotrichea	Choreotrichia	Dictyocystidae	Codonellopsis	Codonellopsis_nipponica	0	0	0	0	0	0	0	0	0	0	0	0	0	0	0	0	1	0	0	0	0	0	0	0	0	0	0	0	0	0	0	0	0	0
OTU_31450	Eukaryota	Alveolata	Ciliophora	Spirotrichea	Choreotrichia	Dictyocystidae	Codonellopsis	Codonellopsis_nipponica	0	0	0	0	0	0	1	0	0	0	1	0	0	0	0	0	0	0	0	0	0	0	0	0	0	0	0	0	0	0	0	0	0	0
OTU_31595	Eukaryota	Alveolata	Ciliophora	Spirotrichea	Choreotrichia	Dictyocystidae	Codonellopsis	Codonellopsis_nipponica	0	0	0	0	0	0	1	0	0	0	0	0	0	0	0	0	0	0	0	0	0	0	0	0	0	0	0	0	0	0	0	0	0	0
OTU_31616	Eukaryota	Alveolata	Ciliophora	Spirotrichea	Choreotrichia	Dictyocystidae	Codonellopsis	Codonellopsis_nipponica	0	0	0	0	0	0	0	0	0	0	0	0	0	0	0	0	3	0	0	0	0	0	0	0	0	0	0	0	0	0	0	0	0	0
OTU_31621	Eukaryota	Alveolata	Ciliophora	Spirotrichea	Choreotrichia	Dictyocystidae	Codonellopsis	Codonellopsis_nipponica	0	0	0	0	0	0	0	0	0	0	0	0	0	0	0	0	0	0	0	0	0	0	0	0	0	1	0	0	0	0	0	0	0	0
OTU_31636	Eukaryota	Alveolata	Ciliophora	Spirotrichea	Choreotrichia	Dictyocystidae	Codonellopsis	Codonellopsis_nipponica	0	0	0	0	0	0	0	0	0	0	1	0	0	0	0	0	1	0	0	0	0	0	0	0	0	0	0	0	0	0	0	0	0	0
OTU_32309	Eukaryota	Alveolata	Ciliophora	Spirotrichea	Choreotrichia	Dictyocystidae	Codonellopsis	Codonellopsis_nipponica	0	0	0	0	0	0	0	0	0	0	0	0	0	0	1	0	0	0	0	0	0	0	0	0	0	0	0	0	0	0	0	0	0	0
OTU_32310	Eukaryota	Alveolata	Ciliophora	Spirotrichea	Choreotrichia	Dictyocystidae	Codonellopsis	Codonellopsis_nipponica	0	0	0	0	0	0	0	0	0	0	0	0	0	0	0	0	1	0	0	0	0	0	0	0	0	0	0	0	0	0	0	0	0	0
OTU_32466	Eukaryota	Alveolata	Ciliophora	Spirotrichea	Choreotrichia	Dictyocystidae	Codonellopsis	Codonellopsis_nipponica	0	0	0	0	0	0	1	0	0	0	0	0	0	0	0	0	0	0	0	0	0	0	0	0	0	0	0	0	0	0	0	0	0	0
OTU_32493	Eukaryota	Alveolata	Ciliophora	Spirotrichea	Choreotrichia	Dictyocystidae	Codonellopsis	Codonellopsis_nipponica	0	0	0	0	0	0	0	0	0	0	0	0	0	0	0	0	0	0	0	0	0	0	0	0	0	1	0	0	0	0	0	0	0	0
OTU_32644	Eukaryota	Alveolata	Ciliophora	Spirotrichea	Choreotrichia	Dictyocystidae	Codonellopsis	Codonellopsis_nipponica	0	0	0	0	0	0	0	0	0	0	0	0	0	0	0	0	1	0	1	0	0	0	0	0	0	0	0	0	0	0	0	0	0	0
OTU_32647	Eukaryota	Alveolata	Ciliophora	Spirotrichea	Choreotrichia	Dictyocystidae	Codonellopsis	Codonellopsis_nipponica	0	0	0	0	0	1	0	0	0	0	0	0	0	0	0	0	0	0	1	0	0	0	0	0	0	0	0	0	0	0	0	0	0	0
OTU_32711	Eukaryota	Alveolata	Ciliophora	Spirotrichea	Choreotrichia	Dictyocystidae	Codonellopsis	Codonellopsis_nipponica	0	0	0	0	0	0	1	0	0	0	0	0	0	0	0	0	0	1	0	0	0	0	0	0	0	0	0	0	0	0	0	0	0	0
OTU_32843	Eukaryota	Alveolata	Ciliophora	Spirotrichea	Choreotrichia	Dictyocystidae	Codonellopsis	Codonellopsis_nipponica	0	0	0	0	0	1	1	0	0	0	0	0	0	0	0	0	0	0	0	0	0	0	0	0	0	0	0	0	0	0	0	0	0	0
OTU_32940	Eukaryota	Alveolata	Ciliophora	Spirotrichea	Choreotrichia	Dictyocystidae	Codonellopsis	Codonellopsis_nipponica	0	0	0	0	0	0	1	0	0	0	0	0	0	0	0	0	0	1	0	0	0	0	0	0	0	0	0	0	0	0	0	0	0	0
OTU_33041	Eukaryota	Alveolata	Ciliophora	Spirotrichea	Choreotrichia	Dictyocystidae	Codonellopsis	Codonellopsis_nipponica	0	0	0	0	0	0	0	0	0	0	0	0	0	0	0	0	1	0	0	0	0	0	0	0	0	0	0	0	0	0	0	0	0	0
OTU_33049	Eukaryota	Alveolata	Ciliophora	Spirotrichea	Choreotrichia	Dictyocystidae	Codonellopsis	Codonellopsis_nipponica	0	0	0	0	0	0	0	0	0	0	0	0	0	0	0	0	1	0	1	0	0	0	0	0	0	0	0	0	0	0	0	0	0	0
OTU_33067	Eukaryota	Alveolata	Ciliophora	Spirotrichea	Choreotrichia	Dictyocystidae	Codonellopsis	Codonellopsis_nipponica	0	0	0	0	0	0	0	0	0	0	0	0	0	0	0	0	0	0	0	0	0	0	0	0	0	1	0	0	0	0	0	0	0	0
OTU_33076	Eukaryota	Alveolata	Ciliophora	Spirotrichea	Choreotrichia	Dictyocystidae	Codonellopsis	Codonellopsis_nipponica	0	0	0	0	0	0	0	0	0	0	0	0	0	0	0	0	0	0	0	0	0	0	0	0	0	1	0	0	0	0	0	0	0	0
OTU_33414	Eukaryota	Alveolata	Ciliophora	Spirotrichea	Choreotrichia	Dictyocystidae	Codonellopsis	Codonellopsis_nipponica	0	0	0	0	0	0	1	0	0	0	0	0	0	0	0	0	0	0	1	0	0	0	0	0	0	0	0	0	0	0	0	0	0	0
OTU_34817	Eukaryota	Alveolata	Dinophyta	Syndiniales	Dino-Group-II	Dino-Group-II-Clade-39	Dino-Group-II-Clade-39_X	Dino-Group-II-Clade-39_X_sp.	0	0	0	0	0	0	0	0	0	0	0	0	0	0	0	0	0	0	0	2	0	0	0	0	0	0	0	0	0	0	0	0	0	0
OTU_35534	Eukaryota	Archaeplastida	Chlorophyta	Ulvophyceae	Ulvales-relatives	Ulvales-relatives_X	Ulva	Ulva_compressa	0	0	0	0	0	0	0	0	0	0	0	0	0	0	0	0	0	0	0	0	0	0	0	1	0	0	0	0	0	0	0	0	0	0
OTU_35760	Eukaryota	Archaeplastida	Chlorophyta	Ulvophyceae	Ulvales-relatives	Ulvales-relatives_X	Ulva	Multi-affiliation	0	0	0	0	0	0	0	0	0	0	0	0	0	0	0	0	0	0	0	0	0	0	2	0	0	0	0	0	0	0	0	0	0	0
OTU_36648	Eukaryota	Archaeplastida	Chlorophyta	Ulvophyceae	Ulvales-relatives	Ulvales-relatives_X	Ulva	Multi-affiliation	0	0	0	0	0	0	0	0	0	0	0	0	0	0	0	0	0	0	0	0	0	0	2	0	0	0	0	0	0	0	0	0	0	0
OTU_36657	Eukaryota	Archaeplastida	Chlorophyta	Ulvophyceae	Ulvales-relatives	Ulvales-relatives_X	Ulva	Ulva_compressa	0	0	0	0	0	0	0	0	0	0	0	0	0	0	0	0	0	0	0	0	0	0	0	0	0	0	0	0	0	0	1	0	0	0
OTU_37353	Eukaryota	Multi-affiliation	Multi-affiliation	Multi-affiliation	Multi-affiliation	Multi-affiliation	Multi-affiliation	Multi-affiliation	0	0	0	0	0	0	0	0	0	0	0	0	0	0	0	0	0	0	0	0	0	0	0	0	2	0	0	0	0	0	0	0	0	0
OTU_37801	Eukaryota	Archaeplastida	Chlorophyta	Ulvophyceae	Ulvales-relatives	Ulvales-relatives_X	Dilabifilum	Dilabifilum_sp.	0	0	0	0	0	0	0	0	0	0	0	0	0	0	0	0	0	0	0	0	0	0	1	1	0	0	0	0	0	0	0	0	0	0
OTU_37847	Eukaryota	Opisthokonta	Mesomycetozoa	Ichthyosporea	Ichthyosphonida	Pseudoperkinsidae	Multi-affiliation	Multi-affiliation	0	0	0	0	0	0	0	0	0	0	0	0	0	0	0	1	0	0	0	0	0	0	1	0	0	0	0	0	0	0	0	0	0	0
OTU_38125	Eukaryota	Hacrobia	Haptophyta	Prymnesiophyceae	Isochrysidales	Isochrysidaceae	Isochrysis	Multi-affiliation	0	0	0	0	0	0	0	0	0	0	0	0	0	0	0	0	0	0	0	0	0	0	0	0	0	0	0	0	0	0	0	2	0	0
OTU_38348	Eukaryota	Multi-affiliation	Multi-affiliation	Multi-affiliation	Multi-affiliation	Multi-affiliation	Multi-affiliation	Multi-affiliation	0	0	0	0	0	0	0	0	0	0	0	0	0	0	0	0	0	0	0	0	0	0	0	0	0	1	0	0	0	0	0	0	0	0
OTU_38532	Eukaryota	Alveolata	Dinophyta	Syndiniales	Dino-Group-II	Dino-Group-II-Clade-39	Dino-Group-II-Clade-39_X	Dino-Group-II-Clade-39_X_sp.	0	0	0	0	0	0	0	0	0	0	0	0	0	0	0	0	0	0	0	0	0	0	0	0	0	0	0	0	0	0	0	1	0	0
OTU_38905	Eukaryota	Multi-affiliation	Multi-affiliation	Multi-affiliation	Multi-affiliation	Multi-affiliation	Multi-affiliation	Multi-affiliation	0	0	0	0	0	0	0	0	0	0	0	0	0	0	0	0	0	0	0	0	0	0	0	0	0	1	0	0	0	0	0	0	0	0
OTU_39823	Eukaryota	Multi-affiliation	Multi-affiliation	Multi-affiliation	Multi-affiliation	Multi-affiliation	Multi-affiliation	Multi-affiliation	0	0	0	0	0	0	0	1	0	0	0	0	0	0	0	0	0	0	0	0	0	0	0	0	0	0	0	0	0	0	0	0	0	0
OTU_39966	Eukaryota	Archaeplastida	Chlorophyta	Ulvophyceae	Ulotrichales	Ulotrichales_X	Urospora	Multi-affiliation	0	0	0	0	0	0	0	0	0	0	0	0	0	0	0	0	0	0	0	0	0	0	0	0	0	0	0	0	2	0	0	0	0	0
OTU_40061	Eukaryota	Alveolata	Dinophyta	Dinophyceae	Dinophyceae_X	Dinophyceae_XX	Protoperidinium	Protoperidinium_bipes	0	0	0	0	0	0	0	0	0	0	0	0	0	0	0	0	0	0	0	0	0	0	0	0	1	0	2	0	0	0	0	0	0	0
OTU_40182	Eukaryota	Alveolata	Dinophyta	Dinophyceae	Dinophyceae_X	Dinophyceae_XX	Protoperidinium	Protoperidinium_bipes	0	0	0	0	0	0	0	0	0	0	0	0	0	0	0	0	0	0	0	0	0	0	0	0	2	0	0	0	0	0	0	0	0	0
OTU_40210	Eukaryota	Alveolata	Dinophyta	Dinophyceae	Dinophyceae_X	Dinophyceae_XX	Protoperidinium	Protoperidinium_bipes	0	0	0	0	0	0	0	0	0	0	0	0	0	0	0	0	0	1	0	0	0	0	0	0	2	0	0	1	0	0	0	0	0	0
OTU_40226	Eukaryota	Alveolata	Dinophyta	Dinophyceae	Dinophyceae_X	Dinophyceae_XX	Protoperidinium	Protoperidinium_bipes	0	0	0	0	0	0	0	0	0	1	0	0	0	0	0	0	0	1	0	0	0	0	0	0	0	0	0	0	0	0	0	0	0	0
OTU_40369	Eukaryota	Alveolata	Dinophyta	Dinophyceae	Dinophyceae_X	Dinophyceae_XX	Protoperidinium	Protoperidinium_bipes	0	0	0	0	0	2	0	0	0	0	0	0	0	0	0	0	0	0	0	0	0	0	0	0	0	0	0	0	0	0	0	0	0	0
OTU_40538	Eukaryota	Alveolata	Dinophyta	Dinophyceae	Dinophyceae_X	Dinophyceae_XX	Protoperidinium	Protoperidinium_bipes	0	0	0	0	0	0	0	0	0	0	0	0	0	0	0	0	0	0	0	0	0	0	0	0	1	0	0	0	0	0	0	0	0	0
OTU_40672	Eukaryota	Alveolata	Dinophyta	Dinophyceae	Dinophyceae_X	Dinophyceae_XX	Protoperidinium	Protoperidinium_bipes	0	0	0	0	0	0	0	0	0	0	0	0	0	0	0	0	1	0	0	0	0	0	0	0	0	0	1	0	0	0	0	0	0	0
OTU_40786	Eukaryota	Alveolata	Dinophyta	Dinophyceae	Dinophyceae_X	Dinophyceae_XX	Protoperidinium	Protoperidinium_bipes	0	0	0	0	0	0	0	0	0	1	0	0	0	0	0	0	0	0	0	0	0	0	0	0	1	0	0	0	0	0	0	0	0	0
OTU_40798	Eukaryota	Alveolata	Dinophyta	Dinophyceae	Dinophyceae_X	Dinophyceae_XX	Protoperidinium	Protoperidinium_bipes	0	0	0	0	0	0	0	0	0	0	1	0	0	0	0	0	0	0	0	0	0	0	0	0	0	0	1	0	0	0	0	0	0	0
OTU_40816	Eukaryota	Alveolata	Dinophyta	Dinophyceae	Dinophyceae_X	Dinophyceae_XX	Protoperidinium	Protoperidinium_bipes	0	0	0	0	0	0	0	0	0	0	0	0	0	0	0	0	0	0	0	0	0	0	0	0	0	0	2	0	0	0	0	0	0	0
OTU_40836	Eukaryota	Alveolata	Dinophyta	Dinophyceae	Dinophyceae_X	Dinophyceae_XX	Protoperidinium	Protoperidinium_bipes	0	0	0	0	0	0	0	0	0	0	0	0	0	0	0	0	0	0	0	0	0	0	0	0	1	0	0	0	0	0	0	0	0	0
OTU_40870	Eukaryota	Alveolata	Dinophyta	Dinophyceae	Dinophyceae_X	Dinophyceae_XX	Protoperidinium	Protoperidinium_bipes	0	0	0	0	0	0	0	0	0	0	0	0	0	0	0	0	0	0	0	0	0	0	0	0	3	0	1	1	0	0	0	0	0	0
OTU_40876	Eukaryota	Alveolata	Dinophyta	Dinophyceae	Dinophyceae_X	Dinophyceae_XX	Protoperidinium	Protoperidinium_bipes	0	0	0	0	0	0	0	0	0	0	0	0	0	0	0	0	0	0	0	0	0	0	0	0	0	0	0	2	0	0	0	0	0	0
OTU_40884	Eukaryota	Alveolata	Dinophyta	Dinophyceae	Dinophyceae_X	Dinophyceae_XX	Protoperidinium	Protoperidinium_bipes	0	0	0	0	0	0	0	0	0	1	0	0	0	0	0	0	0	0	0	1	0	0	0	0	1	0	1	0	0	0	0	0	0	0
OTU_40918	Eukaryota	Alveolata	Dinophyta	Dinophyceae	Dinophyceae_X	Dinophyceae_XX	Protoperidinium	Protoperidinium_bipes	0	0	0	0	0	0	0	0	0	0	0	0	0	0	0	0	0	1	0	0	0	0	0	0	1	0	0	0	0	0	0	0	0	0
OTU_40949	Eukaryota	Alveolata	Dinophyta	Dinophyceae	Dinophyceae_X	Dinophyceae_XX	Protoperidinium	Protoperidinium_bipes	0	0	0	0	0	0	0	0	0	1	0	0	0	0	0	0	0	0	0	0	0	0	0	0	0	0	2	0	0	0	0	0	0	0
OTU_41042	Eukaryota	Alveolata	Dinophyta	Dinophyceae	Dinophyceae_X	Dinophyceae_XX	Protoperidinium	Protoperidinium_bipes	0	0	0	0	0	0	0	0	0	0	0	0	0	0	0	0	0	0	0	0	0	0	0	0	2	0	0	0	0	0	0	0	0	0
OTU_41181	Eukaryota	Alveolata	Dinophyta	Dinophyceae	Dinophyceae_X	Dinophyceae_XX	Protoperidinium	Protoperidinium_bipes	1	0	0	0	0	0	0	0	0	0	0	0	0	0	0	0	0	0	0	1	0	0	0	0	0	0	0	0	0	0	0	0	0	0
OTU_41249	Eukaryota	Alveolata	Dinophyta	Dinophyceae	Dinophyceae_X	Dinophyceae_XX	Protoperidinium	Protoperidinium_bipes	0	0	0	0	0	0	0	0	0	0	0	0	0	0	0	0	0	0	0	0	0	0	0	0	2	0	1	0	0	0	0	0	0	0
OTU_41361	Eukaryota	Alveolata	Dinophyta	Dinophyceae	Dinophyceae_X	Dinophyceae_XX	Protoperidinium	Protoperidinium_bipes	0	0	0	0	0	0	0	0	0	0	0	0	0	0	0	0	0	0	0	0	0	0	0	0	0	0	1	1	0	0	0	0	0	0
OTU_41464	Eukaryota	Alveolata	Dinophyta	Dinophyceae	Dinophyceae_X	Dinophyceae_XX	Protoperidinium	Protoperidinium_bipes	0	0	0	0	0	0	0	0	0	0	0	0	0	0	0	0	0	2	0	0	0	0	0	0	0	0	0	0	0	0	0	0	0	0
OTU_41532	Eukaryota	Alveolata	Dinophyta	Dinophyceae	Dinophyceae_X	Dinophyceae_XX	Protoperidinium	Protoperidinium_bipes	0	0	0	0	0	0	0	0	0	0	0	0	0	0	0	0	0	0	0	3	0	0	0	0	0	0	0	0	0	0	0	0	0	0
OTU_41668	Eukaryota	Alveolata	Dinophyta	Dinophyceae	Dinophyceae_X	Dinophyceae_XX	Protoperidinium	Protoperidinium_bipes	2	0	0	0	0	0	0	0	0	0	0	0	0	0	0	0	0	0	0	0	0	0	0	0	0	0	0	0	0	0	0	0	1	0
OTU_42089	Eukaryota	Alveolata	Dinophyta	Dinophyceae	Dinophyceae_X	Dinophyceae_XX	Protoperidinium	Protoperidinium_bipes	0	0	0	0	0	0	0	0	0	0	0	0	0	0	0	0	0	2	0	0	0	0	0	0	0	0	0	0	0	0	0	0	0	0
OTU_42194	Eukaryota	Alveolata	Dinophyta	Dinophyceae	Dinophyceae_X	Dinophyceae_XX	Protoperidinium	Protoperidinium_bipes	0	0	0	0	0	0	0	0	0	0	0	0	0	0	0	0	0	0	0	3	0	0	0	0	0	0	0	0	0	0	0	0	0	0
OTU_42219	Eukaryota	Stramenopiles	Stramenopiles_X	Labyrinthulomycetes	Amphitremida	Amphitraemidae	Archerella	Archerella_flavum	0	0	0	0	0	0	0	0	0	0	0	0	0	0	0	0	0	0	0	0	0	0	2	0	0	0	0	0	0	0	0	0	0	0
OTU_42551	Eukaryota	Archaeplastida	Chlorophyta	Multi-affiliation	Multi-affiliation	Multi-affiliation	Multi-affiliation	Multi-affiliation	0	0	0	0	0	0	0	0	0	0	0	0	0	0	0	2	0	0	0	0	0	0	0	0	0	0	0	0	0	0	0	0	0	0
OTU_42815	Eukaryota	Archaeplastida	Chlorophyta	Multi-affiliation	Multi-affiliation	Multi-affiliation	Multi-affiliation	Multi-affiliation	0	0	0	0	1	0	0	0	0	0	0	0	0	0	0	1	0	0	0	0	0	0	0	0	0	0	0	0	0	0	0	0	0	0
OTU_43250	Eukaryota	Archaeplastida	Chlorophyta	Multi-affiliation	Multi-affiliation	Multi-affiliation	Multi-affiliation	Multi-affiliation	0	0	0	0	0	0	0	0	0	0	0	0	0	0	0	0	0	0	0	0	0	0	0	1	0	0	0	0	0	0	0	0	0	0
OTU_43469	Eukaryota	Archaeplastida	Chlorophyta	Multi-affiliation	Multi-affiliation	Multi-affiliation	Multi-affiliation	Multi-affiliation	0	0	0	0	0	0	0	0	0	0	0	0	0	0	0	1	0	0	0	0	0	0	0	0	0	2	0	0	0	0	0	0	0	0
OTU_43528	Eukaryota	Archaeplastida	Chlorophyta	Multi-affiliation	Multi-affiliation	Multi-affiliation	Multi-affiliation	Multi-affiliation	0	0	0	0	0	0	0	0	0	0	0	0	0	0	0	0	0	0	0	0	0	0	1	1	0	0	0	0	0	0	0	0	0	0
OTU_43644	Eukaryota	Archaeplastida	Chlorophyta	Multi-affiliation	Multi-affiliation	Multi-affiliation	Multi-affiliation	Multi-affiliation	0	0	0	0	1	0	0	0	0	0	0	0	0	0	0	0	0	0	0	0	0	0	0	0	1	0	0	0	0	0	0	0	0	0
OTU_43699	Eukaryota	Archaeplastida	Chlorophyta	Multi-affiliation	Multi-affiliation	Multi-affiliation	Multi-affiliation	Multi-affiliation	0	0	0	0	0	0	0	0	0	0	0	0	0	0	0	0	0	0	0	0	0	0	0	2	0	0	0	0	0	0	0	0	0	0
OTU_43802	Eukaryota	Archaeplastida	Chlorophyta	Multi-affiliation	Multi-affiliation	Multi-affiliation	Multi-affiliation	Multi-affiliation	0	0	0	0	0	0	0	0	0	0	0	0	0	0	0	1	0	0	0	0	0	0	0	1	0	0	0	0	0	0	0	0	0	0
OTU_43858	Eukaryota	Archaeplastida	Chlorophyta	Multi-affiliation	Multi-affiliation	Multi-affiliation	Multi-affiliation	Multi-affiliation	0	0	0	0	0	0	0	0	0	0	0	0	0	0	0	0	0	0	0	0	0	0	1	0	0	0	0	0	0	0	0	0	0	0
OTU_43891	Eukaryota	Archaeplastida	Chlorophyta	Multi-affiliation	Multi-affiliation	Multi-affiliation	Multi-affiliation	Multi-affiliation	0	0	0	0	0	0	0	0	0	0	0	0	0	0	0	1	0	0	0	0	0	0	0	0	0	0	0	0	0	0	0	0	0	0
OTU_43896	Eukaryota	Archaeplastida	Chlorophyta	Multi-affiliation	Multi-affiliation	Multi-affiliation	Multi-affiliation	Multi-affiliation	0	0	0	0	0	0	0	0	0	0	0	0	0	0	0	1	0	0	0	0	0	0	1	0	0	0	0	0	0	0	0	0	0	0
OTU_43905	Eukaryota	Archaeplastida	Chlorophyta	Multi-affiliation	Multi-affiliation	Multi-affiliation	Multi-affiliation	Multi-affiliation	0	0	0	0	0	0	0	0	0	0	0	0	0	0	0	2	0	0	0	0	0	0	0	1	0	0	0	0	0	0	0	0	0	0
OTU_43961	Eukaryota	Archaeplastida	Chlorophyta	Multi-affiliation	Multi-affiliation	Multi-affiliation	Multi-affiliation	Multi-affiliation	0	0	0	0	0	0	0	0	0	0	0	0	0	0	0	0	0	0	0	0	0	0	1	2	0	0	0	0	0	0	0	0	0	0
OTU_44096	Eukaryota	Archaeplastida	Chlorophyta	Multi-affiliation	Multi-affiliation	Multi-affiliation	Multi-affiliation	Multi-affiliation	0	0	0	0	0	0	0	0	0	0	0	0	0	0	0	1	0	0	0	0	0	0	0	0	0	0	0	0	0	0	0	0	0	0
OTU_44100	Eukaryota	Archaeplastida	Chlorophyta	Multi-affiliation	Multi-affiliation	Multi-affiliation	Multi-affiliation	Multi-affiliation	0	0	0	0	0	0	0	0	0	0	0	0	0	0	0	0	0	0	0	0	0	0	0	1	0	0	0	0	0	0	0	0	0	0
OTU_44204	Eukaryota	Archaeplastida	Chlorophyta	Multi-affiliation	Multi-affiliation	Multi-affiliation	Multi-affiliation	Multi-affiliation	0	0	0	1	0	0	0	0	0	0	0	0	0	0	0	0	0	0	0	0	0	0	1	0	0	0	0	0	0	0	0	0	0	0
OTU_44212	Eukaryota	Archaeplastida	Chlorophyta	Multi-affiliation	Multi-affiliation	Multi-affiliation	Multi-affiliation	Multi-affiliation	0	0	0	0	0	0	0	0	0	0	0	0	0	0	0	1	0	0	0	0	0	0	1	0	0	0	0	0	0	0	0	0	0	0
OTU_44515	Eukaryota	Archaeplastida	Chlorophyta	Multi-affiliation	Multi-affiliation	Multi-affiliation	Multi-affiliation	Multi-affiliation	0	0	0	0	0	0	0	0	0	1	0	0	0	0	0	0	0	0	0	0	0	0	0	0	0	0	0	0	0	0	0	0	0	0
OTU_45170	Eukaryota	Archaeplastida	Chlorophyta	Multi-affiliation	Multi-affiliation	Multi-affiliation	Multi-affiliation	Multi-affiliation	0	0	0	0	1	0	0	0	0	0	0	0	0	0	0	0	0	0	0	0	0	0	0	0	0	0	0	0	0	0	0	0	0	0
OTU_45173	Eukaryota	Archaeplastida	Chlorophyta	Multi-affiliation	Multi-affiliation	Multi-affiliation	Multi-affiliation	Multi-affiliation	0	0	0	0	0	0	0	0	0	0	0	0	0	0	2	0	0	0	0	0	0	0	0	0	0	0	0	0	0	0	0	0	0	0
OTU_45322	Eukaryota	Archaeplastida	Chlorophyta	Multi-affiliation	Multi-affiliation	Multi-affiliation	Multi-affiliation	Multi-affiliation	0	0	0	0	0	0	0	0	0	0	0	0	0	0	1	0	0	0	0	0	0	0	0	0	1	0	0	0	0	0	0	0	0	0
OTU_45393	Eukaryota	Alveolata	Dinophyta	Dinophyceae	Dinophyceae_X	Dinophyceae_XX	Protoperidinium	Protoperidinium_bipes	0	0	0	0	0	0	0	0	0	0	0	0	0	0	0	0	0	2	0	0	0	0	0	0	0	0	0	0	0	0	0	0	0	0
OTU_46017	Eukaryota	Archaeplastida	Chlorophyta	Multi-affiliation	Multi-affiliation	Multi-affiliation	Multi-affiliation	Multi-affiliation	0	0	0	0	2	0	0	0	0	0	0	0	0	0	0	0	0	0	0	0	0	0	0	0	0	0	0	0	0	0	0	0	0	0
OTU_46067	Eukaryota	Archaeplastida	Chlorophyta	Multi-affiliation	Multi-affiliation	Multi-affiliation	Multi-affiliation	Multi-affiliation	0	0	0	0	1	0	0	0	0	0	0	0	0	0	1	0	0	0	0	0	0	0	0	0	0	0	0	0	0	0	0	0	0	0
OTU_46546	Eukaryota	Archaeplastida	Chlorophyta	Multi-affiliation	Multi-affiliation	Multi-affiliation	Multi-affiliation	Multi-affiliation	0	0	0	0	0	0	0	0	0	0	0	0	0	0	0	0	0	0	0	0	0	0	0	1	0	0	0	0	0	0	0	0	0	0
OTU_46665	Eukaryota	Archaeplastida	Chlorophyta	Multi-affiliation	Multi-affiliation	Multi-affiliation	Multi-affiliation	Multi-affiliation	0	0	0	0	0	0	0	0	0	0	0	0	0	0	0	0	0	0	0	0	0	0	2	0	0	0	0	0	0	0	0	0	0	0
OTU_47055	Eukaryota	Stramenopiles	Ochrophyta	Bacillariophyta	Bacillariophyta_X	Polar-centric-Mediophyceae	Minidiscus	Multi-affiliation	0	0	0	0	0	0	0	0	0	0	0	0	0	0	0	0	0	0	0	0	0	0	0	0	2	0	0	0	0	0	0	0	0	0
OTU_47078	Eukaryota	Stramenopiles	Ochrophyta	Bacillariophyta	Bacillariophyta_X	Polar-centric-Mediophyceae	Thalassiosira	Thalassiosira_concaviuscula	0	0	0	0	2	0	0	0	0	0	0	0	0	0	0	0	0	0	0	0	0	0	0	0	0	0	0	0	0	0	0	0	0	0
OTU_47270	Eukaryota	Stramenopiles	Ochrophyta	Bacillariophyta	Bacillariophyta_X	Polar-centric-Mediophyceae	Thalassiosira	Thalassiosira_concaviuscula	0	0	0	0	0	0	0	0	0	0	0	0	0	0	0	1	0	0	0	0	0	0	0	0	0	0	0	0	0	0	0	0	0	0
OTU_47348	Eukaryota	Stramenopiles	Ochrophyta	Bacillariophyta	Bacillariophyta_X	Polar-centric-Mediophyceae	Thalassiosira	Thalassiosira_concaviuscula	0	0	0	0	1	0	0	0	0	0	0	0	0	0	0	0	0	0	0	0	0	0	0	0	0	0	0	0	0	0	0	0	0	0
OTU_47720	Eukaryota	Alveolata	Dinophyta	Dinophyceae	Dinophyceae_X	Pfiesteriaceae	Multi-affiliation	Multi-affiliation	0	1	0	0	0	0	0	0	0	0	0	0	0	0	0	0	0	0	0	0	0	0	0	0	0	0	0	0	0	0	0	0	0	0
OTU_47913	Eukaryota	Alveolata	Dinophyta	Dinophyceae	Suessiales	Suessiales_X	Polarella	Polarella_glacialis	0	0	0	0	0	0	0	0	0	0	0	0	0	0	0	0	0	0	0	0	0	0	0	0	0	0	0	0	2	0	0	0	0	0
OTU_47978	Eukaryota	Alveolata	Dinophyta	Dinophyceae	Suessiales	Suessiales_X	Multi-affiliation	Multi-affiliation	0	0	0	0	0	0	0	0	0	0	0	0	0	0	0	0	0	0	0	0	0	0	0	0	0	0	0	0	0	0	2	0	0	0
OTU_48047	Eukaryota	Alveolata	Dinophyta	Dinophyceae	Dinophyceae_X	Dinophyceae_XX	Dinophyceae_XXX	Dinophyceae_XXX_sp.	0	0	0	0	0	0	0	0	0	0	0	0	0	0	0	0	0	0	0	0	0	0	0	0	0	0	0	2	0	0	0	0	0	0
OTU_48094	Eukaryota	Alveolata	Apicomplexa	Apicomplexa_X	Gregarines	Gregarines_X	Gregarines_XX	Gregarines_XX_sp.	0	0	0	0	0	0	0	0	0	0	0	0	0	0	0	0	0	2	0	0	0	0	0	0	0	0	0	0	0	0	0	0	0	0
OTU_48485	Eukaryota	Alveolata	Dinophyta	Dinophyceae	Dinophyceae_X	Pfiesteriaceae	Multi-affiliation	Multi-affiliation	0	0	1	0	0	0	0	0	0	0	0	0	0	0	0	0	0	0	0	0	0	0	0	0	0	0	0	1	0	0	0	0	0	0
OTU_48631	Eukaryota	Alveolata	Dinophyta	Dinophyceae	Dinophyceae_X	Pfiesteriaceae	Multi-affiliation	Multi-affiliation	0	0	0	0	0	0	0	0	0	0	0	0	0	0	0	0	0	0	0	0	0	0	0	0	0	0	0	0	0	0	0	2	0	0
OTU_48735	Eukaryota	Alveolata	Dinophyta	Dinophyceae	Dinophyceae_X	Pfiesteriaceae	Multi-affiliation	Multi-affiliation	0	0	2	0	0	0	0	0	0	0	0	0	0	0	0	0	0	0	0	0	0	0	0	0	0	0	0	0	0	0	0	0	0	0
OTU_48775	Eukaryota	Alveolata	Dinophyta	Dinophyceae	Dinophyceae_X	Pfiesteriaceae	Multi-affiliation	Multi-affiliation	0	0	0	0	0	0	0	0	0	0	0	0	0	0	0	0	0	0	0	0	1	0	0	0	0	0	0	0	0	0	0	0	0	0
OTU_49006	Eukaryota	Alveolata	Dinophyta	Dinophyceae	Dinophyceae_X	Pfiesteriaceae	Multi-affiliation	Multi-affiliation	0	0	0	0	0	0	0	0	0	0	0	0	0	0	0	0	0	0	0	0	0	0	0	0	0	0	0	0	0	0	0	0	2	0
OTU_49066	Eukaryota	Alveolata	Dinophyta	Dinophyceae	Dinophyceae_X	Pfiesteriaceae	Multi-affiliation	Multi-affiliation	0	0	0	0	0	0	0	0	0	0	0	0	0	0	0	0	0	0	0	0	0	0	0	2	0	0	0	0	0	0	0	0	0	0
OTU_49149	Eukaryota	Alveolata	Dinophyta	Dinophyceae	Dinophyceae_X	Pfiesteriaceae	Multi-affiliation	Multi-affiliation	0	0	0	0	0	0	0	0	0	1	0	0	0	0	0	0	0	0	0	0	0	0	0	0	0	0	0	0	0	0	0	0	0	0
OTU_49215	Eukaryota	Alveolata	Dinophyta	Dinophyceae	Dinophyceae_X	Pfiesteriaceae	Multi-affiliation	Multi-affiliation	0	0	0	0	0	0	0	0	0	2	0	0	0	0	0	0	0	0	0	0	0	0	0	0	0	0	0	0	0	0	0	0	0	0
OTU_49237	Eukaryota	Alveolata	Dinophyta	Dinophyceae	Dinophyceae_X	Pfiesteriaceae	Multi-affiliation	Multi-affiliation	0	0	1	0	0	0	0	1	0	0	0	0	0	0	0	0	0	0	0	0	0	0	0	0	0	0	0	0	0	0	0	0	0	0
OTU_49274	Eukaryota	Alveolata	Dinophyta	Dinophyceae	Dinophyceae_X	Pfiesteriaceae	Multi-affiliation	Multi-affiliation	0	0	0	0	0	0	0	0	0	0	0	0	0	0	0	0	0	0	0	0	0	0	0	2	0	0	0	0	0	0	0	0	0	0
OTU_49679	Eukaryota	Alveolata	Dinophyta	Dinophyceae	Suessiales	Suessiales_X	Multi-affiliation	Multi-affiliation	0	0	0	0	0	0	0	0	0	0	0	0	0	0	0	0	0	0	0	0	0	0	0	0	0	0	0	0	0	1	1	0	0	0
OTU_49680	Eukaryota	Alveolata	Dinophyta	Dinophyceae	Suessiales	Suessiales_X	Multi-affiliation	Multi-affiliation	0	0	0	0	0	0	0	0	0	0	0	0	0	0	0	0	0	0	0	0	0	0	0	0	0	1	0	0	0	0	0	0	0	0
OTU_49695	Eukaryota	Alveolata	Dinophyta	Dinophyceae	Suessiales	Suessiales_X	Multi-affiliation	Multi-affiliation	0	1	0	0	0	0	0	0	0	0	0	0	0	0	0	0	0	0	0	0	0	0	0	0	1	0	0	0	0	0	0	1	1	1
OTU_49727	Eukaryota	Alveolata	Dinophyta	Dinophyceae	Suessiales	Suessiales_X	Multi-affiliation	Multi-affiliation	0	1	0	0	0	0	0	0	0	0	0	0	0	0	0	0	0	0	0	0	0	0	0	0	0	0	0	0	0	0	0	0	1	0
OTU_49744	Eukaryota	Alveolata	Dinophyta	Dinophyceae	Suessiales	Suessiales_X	Multi-affiliation	Multi-affiliation	0	1	0	1	0	0	0	1	0	1	0	0	0	0	0	0	0	0	0	0	0	0	0	0	0	0	0	0	0	0	0	0	1	1
OTU_49758	Eukaryota	Alveolata	Dinophyta	Dinophyceae	Suessiales	Suessiales_X	Polarella	Polarella_glacialis	0	0	0	0	0	0	0	0	0	0	0	0	0	0	0	0	0	0	0	0	0	0	0	0	0	0	0	0	2	0	0	0	0	0
OTU_49789	Eukaryota	Alveolata	Dinophyta	Dinophyceae	Suessiales	Suessiales_X	Multi-affiliation	Multi-affiliation	0	0	0	0	0	0	0	0	0	0	0	0	0	0	0	0	0	0	0	0	0	0	0	0	0	2	0	0	0	0	1	0	0	0
[truncated: 1,223 more rows]
