# Supplementary material for: Unveiling protist diversity associated with the Pacific oyster Crassostrea gigas using blocking and excluding primers
Source: BMC Microbiol. 2020 Jul 3;20:193. doi: 10.1186/s12866-020-01860-1 (PMC7333408; doi:10.1186/s12866-020-01860-1)
Supplement: Supplementary file 6 — Additional file 6: Table S4. OTU annotations and abundances for 18SV4BP samples. [file 12866_2020_1860_MOESM6_ESM.xls]

## Sheet: Table S4
Table S4. OTU annotations and abundances for 18SV4BP samples.
OTU	kingdom	phylum	division	class	order	family	genus	species	O1.S2.R02	O1.S1.R01	O1.S1.R04	O1.S1.R05	O2.S3.R01	O2.S2.R02	O2.S2.R03	O2.S1.R02	O2.S1.R04	O3.S2.R01	O3.S2.R02	O3.S1.R01	O3.S1.R02	O3.S1.R04	O4.S3.R01	O4.S3.R02	O4.S2.R01	O4.S2.R02	O4.S2.R03	O4.S1.R02	O4.S1.R04	O4.S1.R05	O5.S3.R01	O5.S3.R03	O5.S2.R01	O5.S2.R02	O5.S2.R03	O5.S1.R01	O5.S1.R02	O5.S1.R03	O5.S1.R04	O5.S1.R05	O5.S1.R06	O5.S1.R07
OTU_3	Eukaryota	Alveolata	Dinophyta	Dinophyceae	Suessiales	Suessiales_X	Woloszynskia	Woloszynskia_sp._strain1	9523	9093	3754	2916	0	18107	2414	9796	5862	7910	3964	3100	4928	1966	32	2	7781	2886	5664	2982	6009	8306	1	36	13162	16189	5036	2222	5341	11906	8203	2577	4894	3646
OTU_5	Eukaryota	Multi-affiliation	Multi-affiliation	Multi-affiliation	Multi-affiliation	Multi-affiliation	Multi-affiliation	Multi-affiliation	224	2354	939	747	0	462	159	1522	1658	180	159	697	1432	278	12	4	385	149	135	560	2042	2152	0	11	326	554	118	1273	2521	3746	1811	1162	1476	1451
OTU_6	Eukaryota	Alveolata	Dinophyta	Syndiniales	Dino-Group-I	Dino-Group-I-Clade-1	Dino-Group-I-Clade-1_X	Multi-affiliation	121	111	50	27	0	296	64	88	126	382	56	63	56	26	4	0	100	215	419	32	46	51	0	0	121	269	47	148	156	169	209	75	54	121
OTU_7	Eukaryota	Amoebozoa	Lobosa	Lobosa-G1	Lobosa-G1_X	Lobosa-G1_XX	Lobosa-G1_XXX	Lobosa-G1_XXX_sp.	0	0	0	1	0	0	0	0	0	0	0	0	0	0	0	0	0	0	0	0	0	0	0	0	0	0	0	0	0	1	2	0	0	0
OTU_11	Eukaryota	Alveolata	Dinophyta	Dinophyceae	Suessiales	Suessiales_X	Suessiales_XX	Suessiales_XX_sp.	0	671	415	402	0	0	0	426	438	0	0	209	557	272	0	0	0	0	0	164	667	775	0	0	1	0	1	452	2320	1612	519	468	556	683
OTU_12	Eukaryota	Alveolata	Dinophyta	Dinophyceae	Dinophyceae_X	Dinophyceae_XX	Dinophyceae_XXX	Dinophyceae_XXX_sp.	21	373	353	498	1	14	0	212	525	46	1	364	413	176	0	1	0	0	2	483	972	437	21	0	42	16	25	781	1007	1937	749	512	234	705
OTU_13	Eukaryota	Alveolata	Dinophyta	Dinophyceae	Dinophyceae_X	Dinophyceae_XX	Gymnodinium	Gymnodinium_dorsalisulcum	5	506	311	310	0	0	0	508	394	0	1	201	523	145	0	0	0	0	0	73	661	667	0	0	0	0	1	449	1363	1141	660	405	398	493
OTU_14	Eukaryota	Stramenopiles	Ochrophyta	Bacillariophyta	Bacillariophyta_X	Polar-centric-Mediophyceae	Cyclotella	Multi-affiliation	706	0	0	0	146	1135	233	0	0	1891	224	0	0	0	101	127	715	915	928	0	0	0	138	170	839	1195	435	0	0	0	0	1	0	0
OTU_15	Eukaryota	Alveolata	Ciliophora	Oligohymenophorea	Mobilida	Trichodinidae	Trichodina	Trichodina_ruditapicis	485	0	5376	17	7	0	348	0	2	0	3	1599	1060	1185	121	146	0	0	5	0	0	0	26	0	542	122	0	0	0	0	0	0	28	2444
OTU_18	Eukaryota	Alveolata	Dinophyta	Dinophyceae	Dinophyceae_X	Pfiesteriaceae	Multi-affiliation	Multi-affiliation	107	290	283	90	131	134	72	228	193	106	49	86	316	135	33	130	146	107	183	87	240	368	47	185	115	233	36	216	676	708	410	179	184	258
OTU_19	Eukaryota	Stramenopiles	Ochrophyta	Bacillariophyta	Bacillariophyta_X	Polar-centric-Mediophyceae	Multi-affiliation	Multi-affiliation	19	0	0	0	289	0	3	0	0	17	0	0	0	0	1007	3086	5	0	4	0	0	0	326	3083	60	6	3	0	0	0	1	0	0	0
OTU_20	Eukaryota	Multi-affiliation	Multi-affiliation	Multi-affiliation	Multi-affiliation	Multi-affiliation	Multi-affiliation	Multi-affiliation	50	0	0	0	1387	129	423	3	0	27	153	0	0	0	603	381	797	462	208	0	0	0	1130	1057	53	516	0	1	0	0	0	3	0	0
OTU_22	Eukaryota	Alveolata	Dinophyta	Syndiniales	Dino-Group-II	Dino-Group-II-Clade-1	Dino-Group-II-Clade-1_X	Multi-affiliation	0	0	0	0	0	0	0	0	0	0	0	0	0	0	0	0	0	2	0	0	6	2	0	0	0	1	0	0	0	18	0	0	0	24
OTU_23	Eukaryota	Multi-affiliation	Multi-affiliation	Multi-affiliation	Multi-affiliation	Multi-affiliation	Multi-affiliation	Multi-affiliation	156	24	77	32	0	124	104	40	16	207	21	6	34	8	1	34	106	38	69	23	91	29	9	54	151	191	105	9	65	81	34	44	11	27
OTU_26	Eukaryota	Alveolata	Ciliophora	Phyllopharyngea	Phyllopharyngea_X	Phyllopharyngea_XX	Phyllopharyngea_XXX	Phyllopharyngea_XXX_sp.	5	113	40	251	223	16	525	0	1009	325	160	138	49	2091	0	12	40	26	0	0	28	0	51	10	3	24	288	0	1	2	0	154	10	0
OTU_28	Eukaryota	Alveolata	Dinophyta	Dinophyceae	Dinophyceae_X	Dinophyceae_XX	Multi-affiliation	Multi-affiliation	22	77	30	146	0	3	0	21	78	0	0	40	125	16	1	3	35	6	23	108	90	79	0	0	24	8	0	50	220	235	187	120	54	84
OTU_29	Eukaryota	Alveolata	Dinophyta	Dinophyceae	Dinophyceae_X	Dinophyceae_XX	Pentapharsodinium	Pentapharsodinium_tyrrhenicum	133	100	20	0	957	559	187	0	0	229	66	0	28	4	986	758	295	581	262	0	21	8	251	466	116	234	40	0	78	12	0	4	3	16
OTU_32	Eukaryota	Alveolata	Dinophyta	Dinophyceae	Dinophyceae_X	Dinophyceae_XX	Multi-affiliation	Multi-affiliation	55	0	5	80	371	33	36	17	93	37	8	6	5	2	703	316	48	19	53	3	36	37	369	310	58	47	50	53	110	76	90	9	28	9
OTU_34	Eukaryota	Archaeplastida	Chlorophyta	Ulvophyceae	Ulvales-relatives	Ulvales-relatives_X	Ulva	Ulva_intestinalis	0	0	0	0	32	0	0	3	0	13	0	0	9	0	18	47	0	0	0	0	0	2	522	2081	0	0	0	0	46	0	17	0	10	13
OTU_36	Eukaryota	Alveolata	Dinophyta	Dinophyceae	Dinophyceae_X	Dinophyceae_XX	Alexandrium	Multi-affiliation	72	43	1	4	379	136	152	0	0	77	14	0	4	0	219	168	122	301	314	0	26	6	217	375	35	23	4	8	12	0	0	21	5	1
OTU_37	Eukaryota	Alveolata	Dinophyta	Dinophyceae	Dinophyceae_X	Ostreopsidaceae	Coolia	Coolia_monotis	0	280	69	94	0	0	0	117	156	0	0	10	117	84	8	0	0	0	0	16	59	123	0	1	0	0	0	80	284	306	140	14	125	136
OTU_41	Eukaryota	Stramenopiles	Ochrophyta	Bacillariophyta	Bacillariophyta_X	Polar-centric-Mediophyceae	Multi-affiliation	Multi-affiliation	0	0	0	0	341	0	0	0	0	0	0	0	0	0	428	453	0	1	0	0	0	0	86	329	0	0	0	0	0	0	0	0	0	0
OTU_42	Eukaryota	Alveolata	Dinophyta	Dinophyceae	Multi-affiliation	Multi-affiliation	Multi-affiliation	Multi-affiliation	19	262	93	12	4	99	23	181	131	40	16	40	182	91	32	16	64	41	27	96	198	191	0	23	67	42	8	67	498	341	227	111	112	86
OTU_44	Eukaryota	Alveolata	Dinophyta	Dinophyceae	Dinophyceae_X	Dinophyceae_XX	Dinophyceae_XXX	Dinophyceae_XXX_sp.	67	103	14	15	0	1	10	36	50	11	2	15	45	7	40	34	0	0	13	51	140	95	0	52	94	48	49	67	95	133	137	72	82	111
OTU_45	Eukaryota	Alveolata	Dinophyta	Syndiniales	Dino-Group-II	Dino-Group-II-Clade-32	Dino-Group-II-Clade-32_X	Dino-Group-II-Clade-32_X_sp._strain1	0	79	23	2	0	0	0	88	35	0	0	5	25	29	0	0	0	0	0	24	43	48	0	0	0	0	0	11	20	77	24	30	60	51
OTU_46	Eukaryota	Archaeplastida	Chlorophyta	Ulvophyceae	Ulvales-relatives	Ulvales-relatives_X	Blidingia	Blidingia_dawsonii	0	54	1	3	207	0	0	8	0	6	0	0	1	4	23	15	2	9	0	0	8	26	88	832	2	0	0	8	20	48	59	54	5	118
OTU_48	Eukaryota	Alveolata	Ciliophora	Phyllopharyngea	Phyllopharyngea_X	Phyllopharyngea_XX	Phyllopharyngea_XXX	Phyllopharyngea_XXX_sp.	107	0	11	36	0	0	0	0	0	0	0	3	14	3	0	28	0	0	0	0	0	0	0	0	0	0	0	0	0	0	0	0	0	0
OTU_51	Eukaryota	Alveolata	Dinophyta	Dinophyceae	Suessiales	Suessiales_X	Suessiales_XX	Suessiales_XX_sp.	2	52	78	30	0	0	0	33	17	10	9	50	49	13	0	0	0	16	1	83	135	41	0	0	22	0	0	8	103	123	45	66	74	34
OTU_52	Eukaryota	Stramenopiles	Stramenopiles_X	MAST	MAST-1	MAST-1C	MAST-1C_X	MAST-1C_X_sp.	0	8	24	12	0	0	0	43	56	0	0	24	14	2	0	0	6	0	0	44	15	19	0	0	4	0	1	40	59	138	68	48	3	21
OTU_54	Eukaryota	Alveolata	Ciliophora	Oligohymenophorea	Peritrichia	Zoothamniidae	Zoothamnium	Zoothamnium_alternans	0	0	0	0	0	0	0	220	1	0	0	35	0	0	0	0	0	0	0	0	0	106	0	0	0	0	0	0	349	0	0	5	0	0
OTU_55	Eukaryota	Multi-affiliation	Multi-affiliation	Multi-affiliation	Multi-affiliation	Multi-affiliation	Multi-affiliation	Multi-affiliation	6	38	5	0	0	1	1	30	3	25	0	38	12	18	0	0	3	9	15	44	70	17	0	0	0	9	4	8	19	18	70	16	7	72
OTU_56	Eukaryota	Archaeplastida	Chlorophyta	Chlorodendrophyceae	Chlorodendrales	Chlorodendraceae	Chlorodendrales_XX	Multi-affiliation	30	0	0	0	74	3	0	0	0	13	7	0	0	0	184	257	0	0	1	0	0	0	52	395	28	70	5	0	0	0	0	0	0	0
OTU_57	Eukaryota	Archaeplastida	Chlorophyta	Mamiellophyceae	Mamiellales	Bathycoccaceae	Ostreococcus	Multi-affiliation	1	0	0	0	0	0	0	0	0	0	0	0	0	0	0	0	0	3	0	0	0	0	0	0	1	0	0	0	0	0	0	0	0	0
OTU_59	Eukaryota	Alveolata	Dinophyta	Dinophyceae	Dinophyceae_X	Dinophyceae_XX	Protoperidinium	Multi-affiliation	61	2	0	0	9	34	24	0	9	85	26	3	8	0	0	0	91	50	38	2	3	0	0	37	94	84	16	0	32	27	1	10	2	9
OTU_60	Eukaryota	Alveolata	Dinophyta	Syndiniales	Dino-Group-II	Dino-Group-II-Clade-4	Dino-Group-II-Clade-4_X	Dino-Group-II-Clade-4_X_sp.	0	24	9	0	0	0	0	7	9	0	0	4	2	0	0	0	0	0	0	10	9	51	0	0	0	0	0	14	19	51	64	9	25	2
OTU_63	Eukaryota	Alveolata	Dinophyta	Syndiniales	Dino-Group-II	Dino-Group-II-Clade-14	Dino-Group-II-Clade-14_X	Dino-Group-II-Clade-14_X_sp._strain3	0	28	1	4	0	0	0	23	156	0	0	13	26	1	0	0	0	0	0	3	59	44	0	0	0	0	0	6	37	132	9	4	16	21
OTU_64	Eukaryota	Alveolata	Ciliophora	Phyllopharyngea	Suctoria	Acinetidae	Acineta	Acineta_tuberosa	0	0	3	0	10	0	11	4	0	0	0	0	0	0	0	0	14	5	0	0	0	0	748	1	3	0	0	0	0	0	0	0	0	0
OTU_65	Eukaryota	Alveolata	Ciliophora	Phyllopharyngea	Phyllopharyngea_X	Phyllopharyngea_XX	Phyllopharyngea_XXX	Phyllopharyngea_XXX_sp.	3	3	0	30	0	2	0	0	7	10	0	357	191	9	1	24	9	4	86	10	2	6	13	4	0	6	0	23	0	11	26	0	0	2
OTU_68	Eukaryota	Stramenopiles	Stramenopiles_X	Labyrinthulea	Labyrinthulales	Labyrinthulaceae	Labyrinthulaceae_X	Labyrinthulaceae_X_sp.	0	15	9	2	0	0	0	6	26	0	0	10	6	4	0	0	0	0	10	63	35	30	6	22	0	0	0	9	9	3	3	0	0	0
OTU_71	Eukaryota	Alveolata	Ciliophora	Oligohymenophorea	Peritrichia	Zoothamniidae	Zoothamnopsis	Zoothamnopsis_sinica	0	29	4	0	0	0	0	0	0	0	0	0	0	2	29	0	0	0	0	13	6	33	50	2	0	0	0	0	1	0	0	0	2	0
OTU_73	Eukaryota	Alveolata	Dinophyta	Dinophyceae	Dinophyceae_X	Dinophyceae_XX	Multi-affiliation	Multi-affiliation	0	0	0	0	125	9	0	0	0	13	3	0	0	0	149	49	36	0	2	0	0	0	36	281	20	16	0	0	0	0	0	0	0	0
OTU_74	Eukaryota	Alveolata	Dinophyta	Dinophyceae	Suessiales	Suessiales_X	Suessiales_XX	Suessiales_XX_sp.	0	21	30	23	0	0	0	21	12	0	0	24	28	18	0	0	0	0	0	0	18	20	5	0	0	0	0	33	166	79	22	28	38	19
OTU_75	Eukaryota	Alveolata	Dinophyta	Dinophyceae	Dinophyceae_X	Dinophyceae_XX	Dinophyceae_XXX	Dinophyceae_XXX_sp.	0	47	16	16	0	0	0	66	28	0	0	8	22	15	0	0	0	0	0	0	58	27	0	0	0	0	0	21	123	83	37	19	27	30
OTU_76	Eukaryota	Stramenopiles	Stramenopiles_X	Bicoecea	Anoecales	Caecitellaceae	Caecitellus	Caecitellus_parvulus	0	42	22	12	0	0	0	6	21	0	0	7	10	4	4	0	0	0	0	10	82	14	0	0	0	0	0	4	65	34	18	3	10	4
OTU_77	Eukaryota	Stramenopiles	Ochrophyta	Bacillariophyta	Bacillariophyta_X	Polar-centric-Mediophyceae	Multi-affiliation	Multi-affiliation	18	0	0	0	22	6	2	0	0	41	4	0	0	0	61	122	13	4	10	0	4	0	39	104	40	32	7	0	0	0	0	0	1	0
OTU_78	Eukaryota	Alveolata	Dinophyta	Dinophyceae	Dinophyceae_X	Dinophyceae_XX	Gymnodinium	Gymnodinium_sp.	0	8	5	0	0	0	0	10	2	0	0	20	24	10	0	0	0	0	0	0	15	27	0	0	0	0	0	34	34	121	66	5	3	15
OTU_79	Eukaryota	Alveolata	Ciliophora	Phyllopharyngea	Phyllopharyngea_X	Phyllopharyngea_XX	Phyllopharyngea_XXX	Phyllopharyngea_XXX_sp.	16	6	157	76	0	0	141	15	169	0	6	0	7	6	3	0	0	0	0	8	8	2	8	2	0	3	0	0	0	0	0	0	12	15
OTU_81	Eukaryota	Alveolata	Ciliophora	Phyllopharyngea	Suctoria	Paracinetidae	Paracineta	Paracineta_limbata	0	0	0	0	0	0	0	0	0	0	0	0	0	0	0	0	0	0	0	552	0	0	0	0	0	0	0	0	23	0	0	0	0	0
OTU_82	Eukaryota	Alveolata	Dinophyta	Dinophyceae	Dinophyceae_X	Dinophyceae_XX	Heterocapsa	Heterocapsa_triquetra	43	0	0	0	49	150	85	0	0	18	30	0	0	0	5	1	64	117	11	0	0	0	0	4	21	61	26	0	0	0	0	0	0	0
OTU_84	Eukaryota	Alveolata	Ciliophora	Spirotrichea	Choreotrichia	Tintinnidae	Multi-affiliation	Multi-affiliation	13	0	0	0	0	67	47	0	0	25	9	0	0	0	0	0	93	118	107	0	0	0	0	0	13	23	17	0	0	0	0	0	0	0
OTU_85	Eukaryota	Alveolata	Ciliophora	Oligohymenophorea	Multi-affiliation	Multi-affiliation	Multi-affiliation	Multi-affiliation	0	0	0	0	0	0	0	0	0	0	0	0	0	0	0	0	0	0	0	44	0	0	0	0	0	0	0	0	12	0	0	0	0	7
OTU_87	Eukaryota	Alveolata	Dinophyta	Dinophyceae	Suessiales	Suessiales_X	Woloszynskia	Woloszynskia_sp._strain1	26	8	6	2	0	39	0	9	51	12	8	3	7	11	0	0	24	0	37	5	0	62	0	0	46	42	3	5	10	5	24	2	2	14
OTU_89	Eukaryota	Alveolata	Dinophyta	Syndiniales	Dino-Group-II	Dino-Group-II_X	Dino-Group-II_XX	Dino-Group-II_XX_sp.	0	1	0	0	0	0	0	15	1	0	0	3	6	7	0	0	0	0	0	7	8	0	0	0	1	0	0	6	0	47	0	8	3	14
OTU_90	Eukaryota	Stramenopiles	Ochrophyta	Bacillariophyta	Bacillariophyta_X	Polar-centric-Mediophyceae	Thalassiosira	Thalassiosira_concaviuscula	16	0	0	0	6	7	0	0	0	0	0	0	0	0	30	135	0	9	0	0	0	0	10	167	13	0	0	0	0	0	0	0	0	0
OTU_91	Eukaryota	Multi-affiliation	Multi-affiliation	Multi-affiliation	Multi-affiliation	Multi-affiliation	Multi-affiliation	Multi-affiliation	0	0	0	0	0	0	0	0	0	0	0	0	0	0	0	0	0	0	23	0	0	0	0	0	0	0	0	0	0	0	0	0	0	0
OTU_92	Eukaryota	Alveolata	Dinophyta	Syndiniales	Dino-Group-I	Dino-Group-I-Clade-4	Euduboscquella	Euduboscquella_crenulata	27	0	0	0	0	57	42	0	0	17	15	0	0	0	0	0	50	82	114	0	0	0	0	0	19	66	32	0	0	0	0	0	0	0
OTU_93	Eukaryota	Hacrobia	Telonemia	Telonemia_X	Telonemia_XX	Telonemia-Group-2	Telonemia-Group-2_X	Telonemia-Group-2_X_sp.	0	0	0	0	0	0	0	0	4	0	0	0	0	2	0	0	0	0	0	1	0	1	0	0	0	0	0	0	1	0	0	0	0	0
OTU_95	Eukaryota	Alveolata	Dinophyta	Dinophyceae	Dinophyceae_X	Dinophyceae_XX	Alexandrium	Alexandrium_tamarense-GroupIII-IIB	0	0	0	0	0	0	0	0	0	0	0	0	0	0	0	0	0	0	0	0	0	0	0	0	0	0	0	0	48	0	6	0	0	50
OTU_98	Eukaryota	Alveolata	Dinophyta	Syndiniales	Dino-Group-II	Dino-Group-II-Clade-12	Dino-Group-II-Clade-12_X	Dino-Group-II-Clade-12_X_sp.	0	0	1	0	0	0	0	0	13	0	0	2	0	2	0	0	0	0	0	0	0	0	0	0	0	2	0	0	8	0	0	0	0	0
OTU_99	Eukaryota	Alveolata	Dinophyta	Dinophyceae	Dinophyceae_X	Dinophyceae_XX	Dinophyceae_XXX	Dinophyceae_XXX_sp.	0	22	12	0	0	0	0	5	0	0	0	11	9	2	0	0	0	0	0	4	6	3	0	0	0	0	0	5	30	6	17	3	6	26
OTU_100	Eukaryota	Opisthokonta	Mesomycetozoa	Ichthyosporea	Ichthyosphonida	Abeoformidae_Group_MAIP_4	Abeoformidae_Group_MAIP_4_X	Abeoformidae_Group_MAIP_4_X_sp.	0	0	25	15	6	0	0	17	33	0	0	8	20	9	5	0	0	0	0	9	35	15	0	0	0	0	0	6	20	54	9	17	6	5
OTU_103	Eukaryota	Multi-affiliation	Multi-affiliation	Multi-affiliation	Multi-affiliation	Multi-affiliation	Multi-affiliation	Multi-affiliation	0	0	0	0	0	0	0	0	0	0	0	0	0	0	0	0	0	0	0	0	0	0	0	0	0	0	0	10	0	0	0	0	0	0
OTU_106	Eukaryota	Alveolata	Ciliophora	Phyllopharyngea	Phyllopharyngea_X	Phyllopharyngea_XX	Phyllopharyngea_XXX	Phyllopharyngea_XXX_sp.	0	0	44	0	27	1	0	0	0	0	0	28	10	28	5	1	2	0	0	0	0	0	15	0	0	0	0	0	0	0	0	0	0	0
OTU_109	Eukaryota	Stramenopiles	Stramenopiles_X	MOCH	MOCH-3	MOCH-3_X	MOCH-3_XX	MOCH-3_XX_sp.	3	0	0	0	72	12	23	2	0	11	5	2	0	0	40	29	0	38	2	0	0	2	19	21	4	4	0	0	14	0	3	0	0	0
OTU_112	Eukaryota	Alveolata	Dinophyta	Syndiniales	Dino-Group-I	Dino-Group-I-Clade-1	Dino-Group-I-Clade-1_X	Multi-affiliation	0	0	0	0	0	0	0	0	0	0	0	0	0	0	0	0	0	0	0	0	0	0	0	0	0	0	0	0	7	0	0	0	0	0
OTU_113	Eukaryota	Stramenopiles	Ochrophyta	Bacillariophyta	Bacillariophyta_X	Polar-centric-Mediophyceae	Thalassiosira	Multi-affiliation	83	0	0	0	2	10	0	0	0	30	9	0	0	0	3	1	6	3	9	0	0	0	2	11	119	40	3	0	0	0	0	0	0	0
OTU_114	Eukaryota	Alveolata	Dinophyta	Syndiniales	Dino-Group-II	Dino-Group-II-Clade-33	Dino-Group-II-Clade-33_X	Dino-Group-II-Clade-33_X_sp._strain2	0	0	0	0	0	0	0	0	17	0	0	9	4	0	0	0	0	0	0	0	0	0	0	0	0	0	0	0	1	14	0	3	0	5
OTU_115	Eukaryota	Archaeplastida	Chlorophyta	Ulvophyceae	Ulvales-relatives	Ulvales-relatives_X	Ulva	Multi-affiliation	0	0	0	0	19	0	0	3	0	0	0	5	0	2	0	46	0	0	0	0	0	0	100	79	4	0	0	0	0	0	0	0	0	0
OTU_116	Eukaryota	Alveolata	Dinophyta	Dinophyceae	Dinophyceae_X	Dinophyceae_XX	Dinophyceae_XXX	Dinophyceae_XXX_sp.	8	0	0	0	0	37	0	0	0	6	0	0	0	0	0	0	24	0	71	0	0	0	0	0	66	69	21	0	0	0	0	0	0	0
OTU_117	Eukaryota	Alveolata	Dinophyta	Dinophyceae	Suessiales	Suessiales_X	Woloszynskia	Woloszynskia_sp._strain1	4	17	16	0	0	8	0	17	41	4	0	0	2	0	0	0	10	7	1	3	16	13	0	0	13	13	2	6	25	30	8	2	7	2
OTU_118	Eukaryota	Alveolata	Dinophyta	Syndiniales	Dino-Group-II	Dino-Group-II-Clade-32	Dino-Group-II-Clade-32_X	Dino-Group-II-Clade-32_X_sp.	0	45	0	0	0	0	0	0	0	0	0	0	4	0	0	0	0	0	0	0	6	10	0	0	0	0	0	3	1	14	4	16	9	0
OTU_120	Eukaryota	Alveolata	Dinophyta	Dinophyceae	Dinophyceae_X	Dinophyceae_XX	Gyrodinium	Multi-affiliation	0	0	1	0	0	0	0	0	0	0	0	0	0	0	0	0	0	0	0	0	0	0	0	0	0	0	0	0	2	0	0	0	0	1
OTU_121	Eukaryota	Alveolata	Dinophyta	Dinophyceae	Dinophyceae_X	Dinophyceae_XX	Chytriodinium	Chytriodinium_roseum	0	0	16	7	0	0	0	17	3	0	0	0	25	0	0	0	0	0	0	0	1	6	0	0	0	0	0	14	14	31	24	11	0	4
OTU_124	Eukaryota	Alveolata	Dinophyta	Syndiniales	Dino-Group-II	Dino-Group-II-Clade-3	Dino-Group-II-Clade-3_X	Multi-affiliation	0	61	0	4	0	0	0	1	0	0	0	0	4	3	0	0	0	0	4	0	0	5	0	0	0	0	0	0	1	0	0	2	17	12
OTU_125	Eukaryota	Alveolata	Dinophyta	Dinophyceae	Dinophyceae_X	Dinophyceae_XX	Dinophyceae_XXX	Dinophyceae_XXX_sp.	0	17	15	4	0	0	0	1	32	0	0	7	10	0	0	0	0	0	0	0	9	21	0	0	0	0	0	9	26	45	16	18	8	19
OTU_126	Eukaryota	Alveolata	Ciliophora	Oligohymenophorea	Sessilida	Vorticellidae	Vorticellidae_X	Vorticellidae_X_sp.	0	2	0	0	0	0	0	0	0	0	0	0	0	0	0	0	0	0	0	0	0	0	0	0	0	0	0	0	0	0	0	0	0	0
OTU_129	Eukaryota	Alveolata	Dinophyta	Syndiniales	Dino-Group-II	Dino-Group-II-Clade-4	Dino-Group-II-Clade-4_X	Dino-Group-II-Clade-4_X_sp.	0	21	0	0	0	0	0	4	0	0	0	0	4	0	0	0	0	0	0	65	0	0	0	0	0	0	0	13	2	0	26	0	0	0
OTU_131	Eukaryota	Alveolata	Dinophyta	Dinophyceae	Dinophyceae_X	Dinophyceae_XX	Dinophyceae_XXX	Dinophyceae_XXX_sp.	0	2	18	31	0	0	0	10	5	0	0	11	15	4	0	0	0	0	0	23	24	12	0	0	1	0	0	31	2	88	13	11	9	17
OTU_132	Eukaryota	Alveolata	Dinophyta	Dinophyceae	Dinophyceae_X	Dinophyceae_XX	Lepidodinium	Multi-affiliation	19	0	0	0	7	19	0	0	3	8	1	0	2	0	62	31	7	11	0	83	0	0	1	53	19	18	7	0	0	0	0	1	0	6
OTU_133	Eukaryota	Alveolata	Dinophyta	Dinophyceae	Multi-affiliation	Multi-affiliation	Multi-affiliation	Multi-affiliation	0	2	0	0	0	0	0	15	10	0	0	0	9	20	2	0	0	0	0	0	2	7	0	0	0	0	0	14	43	21	66	2	1	35
OTU_135	Eukaryota	Archaeplastida	Chlorophyta	Ulvophyceae	Ulvales-relatives	Ulvales-relatives_X	Halochlorococcum	Multi-affiliation	0	0	0	0	95	0	0	9	0	0	0	0	0	0	5	0	0	0	0	0	6	4	35	40	0	0	0	1	0	0	0	5	0	0
OTU_137	Eukaryota	Alveolata	Dinophyta	Dinophyceae	Dinophyceae_X	Dinophyceae_XX	Archaeperidinium	Multi-affiliation	8	0	0	0	8	44	16	0	0	0	13	0	0	0	0	0	3	13	91	0	0	0	0	0	0	58	0	0	0	0	0	0	0	0
OTU_140	Eukaryota	Alveolata	Dinophyta	Dinophyceae	Suessiales	Suessiales_X	Woloszynskia	Woloszynskia_sp.	6	8	1	0	0	15	0	11	0	13	1	0	3	3	0	0	2	1	0	2	4	29	0	0	17	10	2	8	8	13	5	13	6	2
OTU_141	Eukaryota	Stramenopiles	Ochrophyta	Bacillariophyta	Bacillariophyta_X	Polar-centric-Mediophyceae	Multi-affiliation	Multi-affiliation	33	0	0	0	7	12	3	0	0	106	11	0	0	0	11	10	23	43	12	0	0	2	14	35	50	43	5	0	0	0	0	0	0	0
OTU_142	Eukaryota	Alveolata	Dinophyta	Syndiniales	Dino-Group-II	Dino-Group-II-Clade-16	Dino-Group-II-Clade-16_X	Dino-Group-II-Clade-16_X_sp.	0	6	4	0	0	0	0	28	60	0	0	5	0	1	0	0	0	0	0	0	10	11	0	0	0	0	0	3	2	3	0	0	0	1
OTU_143	Eukaryota	Alveolata	Ciliophora	Oligohymenophorea	Peritrichia	Peritrichia_X	Multi-affiliation	Multi-affiliation	0	0	0	0	0	0	0	0	0	0	0	0	0	0	0	0	0	0	0	0	0	0	0	0	0	0	0	25	0	0	0	0	0	0
OTU_144	Eukaryota	Alveolata	Ciliophora	Oligohymenophorea	Peritrichia	Zoothamniidae	Zoothamnium	Zoothamnium_duplicatum	0	0	0	0	0	6	0	0	0	0	0	0	0	0	8	0	0	0	0	0	0	1	167	1	0	0	0	0	0	0	0	0	0	0
OTU_146	Eukaryota	Opisthokonta	Mesomycetozoa	Ichthyosporea	Ichthyosphonida	Abeoformidae_Group_MAIP_1	Abeoformidae_Group_MAIP_1_X	Abeoformidae_Group_MAIP_1_X_sp.	4	0	2	0	18	19	1	0	18	5	0	0	5	0	9	0	8	8	2	1	9	5	0	2	0	0	0	0	2	7	2	0	3	0
OTU_147	Eukaryota	Stramenopiles	Stramenopiles_X	Bicoecea	Anoecales	Cafeteriaceae	Cafeteria	Multi-affiliation	0	4	0	0	0	0	0	0	0	0	0	0	2	0	0	0	0	0	0	0	0	5	0	0	0	0	0	0	0	0	0	0	1	5
OTU_154	Eukaryota	Stramenopiles	Ochrophyta	Bacillariophyta	Bacillariophyta_X	Raphid-pennate	Multi-affiliation	Multi-affiliation	3	0	0	0	1	7	0	0	0	1	0	0	0	0	5	11	1	2	16	0	0	1	56	59	10	4	3	0	0	0	0	4	0	0
OTU_160	Eukaryota	Alveolata	Dinophyta	Dinophyceae	Dinophyceae_X	Dinophyceae_XX	Dinophyceae_XXX	Dinophyceae_XXX_sp.	2	8	7	22	0	0	0	0	4	0	0	3	8	9	0	0	0	0	0	6	36	8	0	0	0	0	0	0	22	0	2	0	4	0
OTU_162	Eukaryota	Rhizaria	Cercozoa	Filosa-Thecofilosea	Cryomonadida	Protaspa-lineage	Protaspa-lineage_X	Protaspa-lineage_X_sp.	2	0	0	0	17	0	0	0	0	0	1	0	0	0	14	43	4	0	3	0	0	0	34	34	5	4	0	0	0	0	0	0	0	0
OTU_165	Eukaryota	Hacrobia	Cryptophyta	Cryptophyceae	Cryptophyceae_X	Cryptomonadales	Multi-affiliation	Multi-affiliation	0	0	0	0	0	0	0	0	0	0	0	0	0	0	0	0	0	0	0	0	0	0	0	0	0	7	0	0	0	0	0	0	0	0
OTU_166	Eukaryota	Alveolata	Dinophyta	Dinophyceae	Dinophyceae_X	Dinophyceae_XX	Gonyaulax	Gonyaulax_sp.	10	0	0	0	22	0	0	0	0	0	0	0	0	0	9	32	0	0	0	0	0	0	0	102	0	0	0	0	0	0	0	0	0	0
OTU_167	Eukaryota	Alveolata	Ciliophora	Phyllopharyngea	Suctoria	Acinetidae	Acineta	Acineta_tuberosa	0	0	0	0	0	2	0	0	0	10	4	0	0	0	0	0	0	125	3	0	0	0	5	0	0	2	5	0	0	0	0	0	0	0
OTU_168	Eukaryota	Opisthokonta	Mesomycetozoa	Ichthyosporea	Ichthyosphonida	Pseudoperkinsidae	Pseudoperkinsus	Pseudoperkinsus_tapetis	0	0	0	0	1	1	1	1	0	9	3	0	0	0	22	31	12	11	0	0	0	0	0	23	0	5	0	0	2	0	0	0	0	0
OTU_173	Eukaryota	Stramenopiles	Ochrophyta	Bacillariophyta	Bacillariophyta_X	Polar-centric-Mediophyceae	Thalassiosira	Thalassiosira_lundiana	0	0	0	0	9	0	0	0	0	0	0	0	0	0	12	66	0	0	0	0	0	0	5	54	0	0	0	0	0	0	0	0	0	0
OTU_175	Eukaryota	Alveolata	Dinophyta	Dinophyceae	Dinophyceae_X	Dinophyceae_XX	Dinophyceae_XXX	Dinophyceae_XXX_sp.	0	9	7	2	0	0	0	5	3	1	0	0	6	0	0	0	0	0	0	2	10	5	0	0	0	0	0	2	18	37	13	2	14	7
OTU_176	Eukaryota	Alveolata	Dinophyta	Dinophyceae	Dinophyceae_X	Dinophyceae_XX	Bysmatrum	Bysmatrum_subsalsum	0	2	7	5	0	0	0	11	1	0	0	0	0	16	0	0	0	0	0	0	0	0	0	0	0	0	0	0	42	5	0	0	9	2
OTU_186	Eukaryota	Stramenopiles	Ochrophyta	Phaeophyceae	Phaeophyceae_X	Phaeophyceae_XX	Silvetia	Silvetia_siliquosa	0	0	0	0	0	0	0	0	0	0	0	0	5	0	0	0	0	0	0	0	0	0	91	0	0	0	0	22	0	0	0	0	0	0
OTU_187	Eukaryota	Alveolata	Dinophyta	Dinophyceae	Suessiales	Suessiales_X	Woloszynskia	Woloszynskia_sp._strain1	3	10	10	0	0	23	0	4	9	1	1	0	0	12	0	0	3	0	2	0	0	1	0	0	8	19	0	0	0	2	0	0	0	0
OTU_188	Eukaryota	Rhizaria	Cercozoa	Filosa-Thecofilosea	Cryomonadida	Protaspa-lineage	Protaspa-lineage_X	Protaspa-lineage_X_sp.	2	0	0	0	0	0	0	0	0	0	0	1	2	0	3	38	8	0	0	0	0	0	14	16	2	0	0	0	0	2	4	9	3	0
OTU_190	Eukaryota	Alveolata	Dinophyta	Dinophyceae	Dinophyceae_X	Dinophyceae_XX	Dinophyceae_XXX	Dinophyceae_XXX_sp.	0	0	0	0	0	0	0	0	13	0	0	0	9	0	0	0	0	0	0	0	2	0	0	0	0	0	0	9	0	18	11	8	1	0
OTU_194	Eukaryota	Alveolata	Dinophyta	Syndiniales	Dino-Group-I	Dino-Group-I-Clade-1	Dino-Group-I-Clade-1_X	Dino-Group-I-Clade-1_X_sp.	0	0	0	0	0	0	0	0	0	0	0	0	0	0	0	0	0	0	0	0	0	0	0	0	0	0	0	0	0	0	0	0	3	0
OTU_195	Eukaryota	Alveolata	Dinophyta	Dinophyceae	Suessiales	Suessiales_X	Multi-affiliation	Multi-affiliation	5	11	0	0	0	9	0	7	1	0	2	1	6	0	0	0	14	0	3	0	0	2	0	0	8	4	0	0	0	20	2	0	0	2
OTU_196	Eukaryota	Apusozoa	Apusomonadidae	Apusomonadidae_Group-2	Apusomonadidae_Group-2B	Apusomonadidae_Group-2B_X	Apusomonadidae_Group-2B_XX	Apusomonadidae_Group-2B_XX_sp.	0	0	0	0	0	0	0	0	0	0	0	0	0	0	0	0	0	0	0	0	0	0	0	15	0	0	0	0	0	0	0	0	0	0
OTU_197	Eukaryota	Alveolata	Dinophyta	Syndiniales	Dino-Group-II	Dino-Group-II-Clade-39	Dino-Group-II-Clade-39_X	Dino-Group-II-Clade-39_X_sp.	0	0	9	2	0	0	0	0	6	0	0	2	1	2	0	0	0	0	0	0	0	0	0	0	0	0	0	0	0	13	2	7	0	2
OTU_198	Eukaryota	Stramenopiles	Ochrophyta	Bacillariophyta	Bacillariophyta_X	Raphid-pennate	Surirella	Surirella_sp._strain4	0	0	0	0	7	0	0	0	0	0	1	0	0	0	0	3	0	0	3	0	0	0	0	1	3	0	2	0	0	0	0	0	0	0
OTU_199	Eukaryota	Alveolata	Dinophyta	Dinophyceae	Suessiales	Suessiales_X	Woloszynskia	Woloszynskia_sp._strain1	5	5	3	0	0	9	0	5	3	0	3	4	26	0	0	0	4	5	3	0	3	8	0	0	4	9	0	0	9	27	4	0	10	2
OTU_202	Eukaryota	Stramenopiles	Ochrophyta	Bacillariophyta	Bacillariophyta_X	Raphid-pennate	Achnanthes	Multi-affiliation	0	0	1	0	0	0	0	0	0	0	0	0	0	0	2	2	10	18	0	0	4	4	2	12	0	0	3	2	0	0	0	3	0	11
OTU_204	Eukaryota	Opisthokonta	Fungi	Ascomycota	Pezizomycotina	Eurotiomycetes	Placidium	Placidium_acarosporoides	0	0	0	0	0	0	0	0	0	0	0	2	2	0	0	0	0	0	0	4	0	0	0	0	0	0	0	0	15	27	3	0	2	7
OTU_207	Eukaryota	Alveolata	Dinophyta	Syndiniales	Dino-Group-II	Dino-Group-II_X	Dino-Group-II_XX	Dino-Group-II_XX_sp.	3	0	0	0	0	0	0	1	0	0	0	0	0	3	0	0	0	0	0	0	2	0	0	0	0	4	0	0	0	0	0	0	8	5
OTU_208	Eukaryota	Alveolata	Dinophyta	Syndiniales	Dino-Group-II	Dino-Group-II-Clade-3	Dino-Group-II-Clade-3_X	Dino-Group-II-Clade-3_X_sp._strain5	0	0	7	2	0	0	0	0	0	0	0	0	0	0	0	0	0	0	0	0	3	0	0	0	0	0	0	0	24	0	7	0	0	5
OTU_209	Eukaryota	Stramenopiles	Ochrophyta	Bacillariophyta	Bacillariophyta_X	Polar-centric-Mediophyceae	Multi-affiliation	Multi-affiliation	0	0	0	0	3	0	0	0	0	0	0	0	0	0	2	59	0	0	0	0	0	0	0	21	0	0	0	0	0	0	0	0	0	0
OTU_210	Eukaryota	Archaeplastida	Chlorophyta	Ulvophyceae	Ulvales-relatives	Ulvales-relatives_X	Acrochaete	Acrochaete_leptochaete	0	0	0	0	0	0	0	0	0	0	0	0	0	0	0	0	0	0	0	0	0	0	0	0	0	2	0	0	0	0	0	0	0	0
OTU_212	Eukaryota	Stramenopiles	Stramenopiles_X	Bicoecea	Borokales	Borokaceae	Borokaceae_X	Borokaceae_X_sp.	0	3	0	0	0	0	0	0	0	0	0	0	0	0	0	0	0	0	0	0	0	0	0	0	0	0	0	0	16	0	0	0	0	0
OTU_215	Eukaryota	Alveolata	Ciliophora	Oligohymenophorea	Sessilida	Vorticellidae	Vorticellidae_X	Vorticellidae_X_sp.	0	0	0	0	0	0	0	0	0	0	0	0	0	0	0	0	0	0	0	0	0	0	3	4	0	0	0	0	36	0	0	0	0	0
OTU_216	Eukaryota	Stramenopiles	Stramenopiles_X	Bicoecea	Anoecales	Cafeteriaceae	Cafeteria	Cafeteria_roenbergensis_strain2	0	0	0	0	0	0	0	5	1	0	0	0	0	0	0	0	0	0	0	0	10	0	0	0	0	0	0	0	0	0	0	0	0	0
OTU_217	Eukaryota	Alveolata	Dinophyta	Dinophyceae	Dinophyceae_X	Dinophyceae_XX	Dinophyceae_XXX	Dinophyceae_XXX_sp.	0	0	0	0	0	0	0	0	0	0	0	1	0	0	0	0	0	0	0	0	0	0	0	67	0	0	0	0	0	0	0	0	0	0
OTU_220	Eukaryota	Alveolata	Ciliophora	Oligohymenophorea	Peritrichia	Zoothamniidae	Zoothamnium	Zoothamnium_duplicatum	0	0	0	2	0	0	0	0	0	0	0	0	0	0	0	0	0	0	0	0	0	0	75	0	0	0	0	0	0	0	0	0	0	0
OTU_222	Eukaryota	Alveolata	Dinophyta	Dinophyceae	Dinophyceae_X	Dinophyceae_XX	Dinophyceae_XXX	Dinophyceae_XXX_sp.	0	0	0	0	4	0	0	0	0	0	1	0	0	0	12	2	0	0	0	0	0	0	0	57	0	0	0	0	0	0	0	0	0	0
OTU_223	Eukaryota	Archaeplastida	Chlorophyta	Ulvophyceae	Ulotrichales	Ulotrichales_X	Urospora	Urospora_sp.	0	4	0	0	0	3	6	0	0	0	0	0	0	0	3	0	2	10	1	0	0	7	12	22	0	0	0	0	0	0	0	0	0	0
OTU_225	Eukaryota	Stramenopiles	Ochrophyta	Bacillariophyta	Bacillariophyta_X	Polar-centric-Mediophyceae	Skeletonema	Skeletonema_dohrnii	3	0	0	0	0	0	0	0	0	0	0	0	0	0	0	3	0	0	0	0	0	0	0	13	0	0	0	0	0	0	0	0	0	0
OTU_226	Eukaryota	Alveolata	Ciliophora	Phyllopharyngea	Cyrtophoria	Chlamydodontidae	Chlamydodon	Chlamydodon_sp.	0	0	0	0	0	0	0	0	0	0	0	0	0	0	0	0	0	0	0	0	0	0	89	0	0	0	0	0	0	0	0	0	0	0
OTU_228	Eukaryota	Alveolata	Dinophyta	Dinophyceae	Dinophyceae_X	Dinophyceae_XX	Dinophyceae_XXX	Dinophyceae_XXX_sp.	2	0	0	0	0	5	0	0	0	5	5	0	0	0	0	0	0	10	0	0	0	0	0	0	7	7	25	0	0	0	0	0	0	0
OTU_232	Eukaryota	Alveolata	Apicomplexa	Apicomplexa_X	Gregarines	Gregarines_X	Gregarinidae	Gregarinidae_sp.	0	0	2	0	0	0	9	7	0	0	0	0	1	0	0	0	0	0	0	0	0	0	0	0	0	0	0	0	37	0	0	0	0	0
OTU_233	Eukaryota	Alveolata	Dinophyta	Dinophyceae	Dinophyceae_X	Dinophyceae_XX	Thecate	Thecate_sp.	14	0	0	0	0	11	6	0	0	0	0	0	0	0	0	0	0	18	8	0	0	0	0	17	2	10	0	0	0	0	0	0	0	0
OTU_234	Eukaryota	Stramenopiles	Stramenopiles_X	Labyrinthulea	Thraustochytriales	Thraustochytriaceae	Thraustochytriaceae_X	Thraustochytriaceae_X_sp.	0	0	0	0	0	8	15	0	0	12	0	0	0	0	11	0	15	0	12	0	0	0	0	2	1	4	5	0	0	0	0	0	0	0
OTU_240	Eukaryota	Alveolata	Dinophyta	Syndiniales	Dino-Group-II	Dino-Group-II-Clade-1	Dino-Group-II-Clade-1_X	Dino-Group-II-Clade-1_X_sp.	12	0	0	0	3	2	0	0	0	9	2	0	0	0	0	0	6	0	3	0	0	0	0	0	9	25	0	0	0	0	0	0	0	0
OTU_244	Eukaryota	Alveolata	Dinophyta	Syndiniales	Dino-Group-II	Dino-Group-II_X	Dino-Group-II_XX	Dino-Group-II_XX_sp.	0	0	1	0	0	0	0	1	0	0	0	0	5	0	0	0	0	0	0	0	0	0	0	0	0	0	0	0	14	1	20	0	7	0
OTU_245	Eukaryota	Multi-affiliation	Multi-affiliation	Multi-affiliation	Multi-affiliation	Multi-affiliation	Multi-affiliation	Multi-affiliation	2	7	2	3	0	0	1	5	3	0	0	3	9	2	0	0	0	0	0	0	3	1	0	0	0	2	0	4	13	4	0	2	3	2
OTU_246	Eukaryota	Stramenopiles	Stramenopiles_X	Stramenopiles_XX	Stramenopiles_XXX	Stramenopiles_XXXX	Stramenopiles_XXXXX	Stramenopiles_XXXXX_sp.	2	0	0	0	0	0	0	8	0	0	0	0	0	0	0	10	0	1	6	0	0	0	0	0	0	0	0	0	0	0	0	0	0	0
OTU_247	Eukaryota	Stramenopiles	Ochrophyta	Bacillariophyta	Bacillariophyta_X	Polar-centric-Mediophyceae	Thalassiosira	Thalassiosira_oceanica	11	0	0	0	7	0	0	0	0	4	0	0	0	0	0	0	9	0	0	0	0	0	0	11	9	7	2	0	0	0	0	0	0	0
OTU_248	Eukaryota	Stramenopiles	Ochrophyta	Phaeophyceae	Phaeophyceae_X	Phaeophyceae_XX	Sphacelaria	Sphacelaria_sp.	0	0	0	0	0	0	0	0	0	0	0	0	0	0	0	75	0	0	0	0	0	0	0	0	0	0	0	0	0	0	0	0	0	0
OTU_249	Eukaryota	Alveolata	Dinophyta	Dinophyceae	Dinophyceae_X	Dinophyceae_XX	Pheopolykrikos	Pheopolykrikos_beauchampii	0	0	0	0	0	0	0	0	0	0	0	0	0	0	0	0	0	0	0	0	0	0	0	0	0	0	0	0	1	0	0	0	0	0
OTU_252	Eukaryota	Opisthokonta	Fungi	Ascomycota	Pezizomycotina	Eurotiomycetes	Placidium	Placidium_acarosporoides	0	0	0	12	0	0	0	0	0	0	0	0	0	0	0	0	0	0	0	0	0	6	0	0	0	0	0	1	4	0	0	0	0	0
OTU_253	Eukaryota	Rhizaria	Cercozoa	Filosa-Thecofilosea	Cryomonadida	Protaspa-lineage	Protaspa	Protaspa_obliqua	0	0	0	0	7	0	0	0	0	0	0	0	0	0	10	24	0	0	1	0	0	0	10	16	0	0	0	0	0	0	0	0	0	0
OTU_258	Eukaryota	Alveolata	Ciliophora	Spirotrichea	Choreotrichia	Stenosemellidae	Stenosemella	Stenosemella_pacifica	9	0	0	0	0	4	9	0	0	3	0	0	0	0	0	0	9	2	3	0	0	0	0	0	1	17	7	0	0	0	0	0	0	0
OTU_260	Eukaryota	Stramenopiles	Stramenopiles_X	Labyrinthulea	Thraustochytriales	Thraustochytriaceae	Aurantiochytrium	Aurantiochytrium_sp.	0	0	0	0	2	0	0	0	0	0	4	0	0	0	8	0	2	0	0	0	0	0	1	1	4	0	0	0	0	0	0	0	0	1
OTU_262	Eukaryota	Archaeplastida	Chlorophyta	Ulvophyceae	Ulvales-relatives	Ulvales-relatives_X	Blidingia	Blidingia_dawsonii	0	0	0	0	0	1	0	0	0	0	0	0	2	0	2	4	0	0	0	0	0	0	0	1	0	0	0	0	0	0	0	0	0	0
OTU_263	Eukaryota	Alveolata	Dinophyta	Syndiniales	Dino-Group-II	Dino-Group-II-Clade-33	Dino-Group-II-Clade-33_X	Dino-Group-II-Clade-33_X_sp._strain2	0	0	14	0	0	0	0	0	0	0	0	0	0	0	0	0	0	0	0	0	0	0	0	0	0	0	0	0	0	3	1	0	0	2
OTU_264	Eukaryota	Alveolata	Dinophyta	Dinophyceae	Suessiales	Suessiales_X	Suessiales_XX	Suessiales_XX_sp.	0	0	0	1	0	0	0	3	0	0	0	0	3	0	0	0	0	0	0	0	0	8	0	0	0	0	0	0	19	0	0	2	0	8
OTU_265	Eukaryota	Rhizaria	Cercozoa	Filosa-Thecofilosea	Cryomonadida	Protaspa-lineage	Protaspa-lineage_X	Protaspa-lineage_X_sp.	1	0	0	2	1	0	0	0	0	1	5	0	0	0	0	1	1	0	3	0	0	0	0	7	3	0	0	0	0	1	5	0	0	0
OTU_268	Eukaryota	Alveolata	Ciliophora	Litostomatea	Haptoria	Amphileptidae	Amphileptidae_X	Amphileptidae_X_sp.	0	0	0	0	0	0	0	0	0	0	0	0	0	0	0	0	0	0	0	0	0	0	0	0	0	0	0	0	0	0	67	0	0	0
OTU_269	Eukaryota	Alveolata	Dinophyta	Dinophyceae	Dinophyceae_X	Dinophyceae_XX	Gonyaulax	Gonyaulax_verior	0	0	0	0	0	0	0	0	0	0	0	0	0	0	0	0	0	0	0	0	0	0	0	66	0	0	0	0	0	0	0	0	0	0
OTU_271	Eukaryota	Alveolata	Dinophyta	Dinophyceae	Multi-affiliation	Multi-affiliation	Multi-affiliation	Multi-affiliation	0	0	0	0	0	2	2	0	0	1	0	0	0	0	0	0	11	1	0	0	0	0	0	0	0	0	0	0	0	3	31	0	0	0
OTU_273	Eukaryota	Stramenopiles	Ochrophyta	Bacillariophyta	Bacillariophyta_X	Polar-centric-Mediophyceae	Multi-affiliation	Multi-affiliation	0	0	0	0	0	0	0	0	0	0	0	0	0	0	7	0	3	0	0	0	0	0	0	0	0	0	0	0	0	0	0	0	0	0
OTU_276	Eukaryota	Alveolata	Dinophyta	Dinophyceae	Dinophyceae_X	Dinophyceae_XX	Dinophyceae_XXX	Dinophyceae_XXX_sp.	0	0	0	0	0	0	0	0	3	0	0	0	0	0	0	0	0	0	0	0	0	0	0	0	0	0	0	0	0	0	0	0	0	0
OTU_281	Eukaryota	Alveolata	Dinophyta	Dinophyceae	Dinophyceae_X	Dinophyceae_XX	Dinophyceae_XXX	Dinophyceae_XXX_sp.	0	0	1	0	0	0	0	0	0	0	0	0	4	0	0	0	0	0	0	4	53	0	0	0	0	0	0	0	2	0	0	0	0	1
OTU_283	Eukaryota	Alveolata	Dinophyta	Syndiniales	Dino-Group-II	Dino-Group-II-Clade-8	Dino-Group-II-Clade-8_X	Multi-affiliation	0	0	0	0	0	0	0	0	0	0	0	0	1	0	0	0	0	0	0	0	0	0	0	0	0	0	0	2	0	0	0	0	0	0
OTU_287	Eukaryota	Alveolata	Dinophyta	Syndiniales	Dino-Group-II	Dino-Group-II-Clade-1	Dino-Group-II-Clade-1_X	Dino-Group-II-Clade-1_X_sp.	0	0	7	0	0	0	0	0	0	0	0	0	8	0	0	0	0	0	0	0	0	0	0	0	0	0	0	0	0	0	7	0	2	0
OTU_289	Eukaryota	Alveolata	Dinophyta	Syndiniales	Dino-Group-II	Dino-Group-II-Clade-50	Dino-Group-II-Clade-50_X	Dino-Group-II-Clade-50_X_sp._strain1	0	4	0	11	0	0	0	0	0	0	0	0	1	2	0	0	0	0	0	0	4	0	0	0	0	0	0	0	0	0	0	0	0	0
OTU_290	Eukaryota	Alveolata	Dinophyta	Syndiniales	Dino-Group-II	Dino-Group-II-Clade-47	Dino-Group-II-Clade-47_X	Dino-Group-II-Clade-47_X_sp._strain1	0	0	0	0	0	0	0	13	0	1	0	0	0	0	0	0	0	0	0	0	0	1	0	0	14	7	0	0	0	0	0	0	0	0
OTU_291	Eukaryota	Archaeplastida	Chlorophyta	Mamiellophyceae	Mamiellales	Mamiellaceae	Micromonas	Micromonas_pusilla-Clade-C.D.5	0	0	0	0	0	0	0	0	0	0	0	0	0	0	0	0	0	4	0	0	0	0	0	0	0	0	0	0	0	0	0	0	0	0
OTU_292	Eukaryota	Archaeplastida	Chlorophyta	Ulvophyceae	Ulotrichales	Ulotrichales_X	Gomontia	Gomontia_polyrhiza	0	0	0	0	0	3	0	0	0	0	0	0	0	0	0	0	0	0	0	0	0	0	0	0	0	0	0	0	5	0	0	0	0	24
OTU_296	Eukaryota	Stramenopiles	Ochrophyta	Bacillariophyta	Bacillariophyta_X	Polar-centric-Mediophyceae	Thalassiosira	Thalassiosira_pseudonana	13	0	0	0	0	5	0	0	0	9	4	0	0	0	0	0	6	8	9	0	0	0	0	0	0	5	5	0	0	0	0	0	0	0
OTU_298	Eukaryota	Rhizaria	Cercozoa	Filosa-Thecofilosea	Cryomonadida	Protaspa-lineage	Protaspa-lineage_X	Protaspa-lineage_X_sp.	0	0	0	0	0	0	0	0	0	0	0	0	0	0	0	0	0	0	0	0	0	0	0	0	0	0	0	0	1	0	2	0	0	0
OTU_300	Eukaryota	Alveolata	Ciliophora	Spirotrichea	Oligotrichia	Strombidiidae	Multi-affiliation	Multi-affiliation	1	0	0	0	0	0	0	0	0	0	0	0	0	0	0	0	0	0	0	0	0	0	0	0	0	1	0	0	43	0	0	0	0	0
OTU_301	Eukaryota	Alveolata	Dinophyta	Dinophyceae	Dinophyceae_X	Dinophyceae_XX	Dinophyceae_XXX	Dinophyceae_XXX_sp.	0	0	0	26	0	0	0	0	0	0	0	0	2	0	0	0	0	0	0	0	0	5	0	0	0	0	0	0	1	12	0	0	0	0
OTU_302	Eukaryota	Alveolata	Dinophyta	Syndiniales	Dino-Group-II	Dino-Group-II-Clade-1	Dino-Group-II-Clade-1_X	Dino-Group-II-Clade-1_X_sp.	0	0	0	0	0	0	0	0	0	0	0	0	0	0	0	0	0	0	0	0	0	0	0	0	0	0	0	0	0	4	0	7	0	18
OTU_306	Eukaryota	Stramenopiles	Ochrophyta	Bacillariophyta	Bacillariophyta_X	Raphid-pennate	Navicula	Navicula_sp._strain2	2	0	0	0	8	0	0	0	0	0	0	0	0	0	0	0	0	0	0	0	0	0	3	2	0	27	0	0	0	0	0	0	0	0
OTU_310	Eukaryota	Alveolata	Dinophyta	Dinophyceae	Dinophyceae_X	Dinophyceae_XX	Protoperidinium	Protoperidinium_bipes	3	0	0	0	0	0	0	0	0	0	0	0	0	0	0	0	0	0	0	0	0	0	0	0	2	1	1	0	0	0	0	0	0	0
OTU_314	Eukaryota	Alveolata	Dinophyta	Dinophyceae	Dinophyceae_X	Dinophyceae_XX	Gonyaulax	Gonyaulax_spinifera_strain1	0	0	0	0	5	0	0	0	0	0	0	0	0	0	1	22	0	0	0	0	0	0	0	5	0	0	0	0	0	0	0	0	0	0
OTU_316	Eukaryota	Archaeplastida	Chlorophyta	Prasino-Clade-V	Pseudoscourfieldiales	Pycnococcaceae	Multi-affiliation	Multi-affiliation	0	1	0	0	5	0	1	0	0	5	0	0	0	0	0	0	0	4	3	0	0	0	0	0	0	2	8	0	21	0	0	0	0	0
OTU_317	Eukaryota	Alveolata	Dinophyta	Dinophyceae	Dinophyceae_X	Dinophyceae_XX	Multi-affiliation	Multi-affiliation	8	0	0	0	3	0	13	0	0	0	0	0	0	0	0	12	0	0	0	0	0	0	0	7	0	0	0	0	0	0	0	0	0	0
OTU_322	Eukaryota	Opisthokonta	Mesomycetozoa	Ichthyosporea	Ichthyosphonida	Abeoformidae_Group_MAIP_2	Abeoformidae_Group_MAIP_2_X	Abeoformidae_Group_MAIP_2_X_sp.	5	0	0	0	0	13	13	0	0	3	0	0	0	0	0	0	0	0	5	0	0	0	0	0	11	5	3	0	0	0	0	0	0	0
OTU_323	Eukaryota	Archaeplastida	Chlorophyta	Chlorophyceae	Sphaeropleales	Sphaeropleales_X	Pseudomuriella	Pseudomuriella_sp.	0	0	0	0	0	0	0	0	0	0	0	0	0	0	5	0	0	0	0	0	0	0	1	16	0	0	0	0	0	0	0	0	0	0
OTU_324	Eukaryota	Archaeplastida	Rhodophyta	Florideophyceae	Bonnemaisoniales	Bonnemaisoniaceae	Asparagopsis	Asparagopsis_armata	0	0	0	0	56	0	0	0	0	0	0	0	0	0	0	0	0	0	0	0	0	0	0	0	0	0	0	0	0	0	0	0	0	0
OTU_328	Eukaryota	Alveolata	Dinophyta	Dinophyceae	Dinophyceae_X	Dinophyceae_XX	Dinophyceae_XXX	Dinophyceae_XXX_sp.	0	0	0	0	0	0	0	0	0	0	0	0	0	0	0	0	0	0	0	0	0	1	0	0	0	0	0	2	0	0	0	0	0	0
OTU_331	Eukaryota	Archaeplastida	Rhodophyta	Florideophyceae	Colaconematales	Colaconematales_X	Multi-affiliation	Multi-affiliation	0	51	0	0	0	0	0	0	0	0	0	0	0	0	0	0	0	0	0	0	0	0	0	0	0	0	0	0	0	0	0	0	0	0
OTU_332	Eukaryota	Alveolata	Dinophyta	Dinophyceae	Dinophyceae_X	Dinophyceae_XX	Gymnodinium	Gymnodinium_sp.	0	0	0	0	0	0	0	0	0	0	0	0	0	0	0	0	0	0	0	0	0	0	2	18	15	9	3	0	0	0	0	0	0	0
OTU_334	Eukaryota	Alveolata	Apicomplexa	Apicomplexa_X	Gregarines	Gregarines_X	Gregarines_XX	Gregarines_XX_sp.	0	0	0	0	0	0	0	0	0	0	0	0	0	0	0	0	0	0	0	0	0	0	0	40	0	0	0	0	0	0	0	0	0	0
OTU_335	Eukaryota	Alveolata	Dinophyta	Syndiniales	Dino-Group-II	Dino-Group-II-Clade-2	Dino-Group-II-Clade-2_X	Dino-Group-II-Clade-2_X_sp.	0	0	0	0	16	0	0	0	0	0	0	0	0	0	27	0	0	0	0	0	0	0	0	0	0	0	0	0	0	0	0	0	0	0
OTU_336	Eukaryota	Archaeplastida	Chlorophyta	Ulvophyceae	Ulvales-relatives	Ulvales-relatives_X	Dilabifilum	Dilabifilum_arthropyreniae	0	0	4	0	0	0	0	0	0	0	0	0	0	0	0	0	0	4	0	0	2	0	0	0	0	0	0	4	25	0	0	0	0	0
OTU_339	Eukaryota	Alveolata	Dinophyta	Dinophyceae	Dinophyceae_X	Dinophyceae_XX	Dinophyceae_XXX	Dinophyceae_XXX_sp.	0	0	0	0	7	0	0	0	0	3	0	0	0	0	1	15	0	0	0	0	0	0	0	17	0	7	0	0	0	0	0	0	0	0
OTU_341	Eukaryota	Stramenopiles	Stramenopiles_X	MAST	MAST-6	MAST-6_X	MAST-6_XX	MAST-6_XX_sp.	0	0	0	0	0	0	0	0	0	0	0	0	0	0	0	0	0	0	0	0	0	3	0	0	0	0	0	0	0	0	0	0	0	0
OTU_343	Eukaryota	Alveolata	Dinophyta	Dinophyceae	Dinophyceae_X	Dinophyceae_XX	Dinophyceae_XXX	Multi-affiliation	0	0	0	0	0	4	0	0	0	0	0	0	1	4	0	0	0	0	0	1	0	4	0	0	0	3	0	1	1	7	5	1	2	0
OTU_344	Eukaryota	Archaeplastida	Chlorophyta	Chlorophyceae	Chlamydomonadales	Chlamydomonadales_X	Chlamydomonas	Chlamydomonas_parkeae	12	0	0	0	0	17	0	0	0	0	0	0	0	0	0	0	6	0	0	0	0	0	0	0	0	0	3	0	0	0	0	0	0	0
OTU_346	Eukaryota	Alveolata	Ciliophora	Phyllopharyngea	Suctoria	Multi-affiliation	Multi-affiliation	Multi-affiliation	0	0	0	0	0	0	7	0	0	0	0	0	0	0	0	0	25	0	6	0	0	0	0	0	0	0	0	0	0	0	0	0	0	0
OTU_347	Eukaryota	Archaeplastida	Chlorophyta	Ulvophyceae	Ulvales-relatives	Ulvales-relatives_X	Ulvales-relatives_XX	Ulvales-relatives_XX_sp.	0	0	0	0	0	0	0	0	0	0	0	0	0	0	10	0	2	0	0	0	32	0	0	0	0	0	0	0	0	0	0	0	0	0
OTU_348	Eukaryota	Archaeplastida	Chlorophyta	Ulvophyceae	Ulvales-relatives	Ulvales-relatives_X	Blidingia	Blidingia_dawsonii	0	0	0	0	0	0	0	12	0	0	0	2	0	0	0	0	0	1	0	0	0	0	11	0	0	0	0	0	0	0	0	0	0	0
OTU_349	Eukaryota	Alveolata	Apicomplexa	Apicomplexa_X	Apicomplexa_XX	Apicomplexa_XXX	Apicomplexa_XXXX	Apicomplexa_XXXX_sp.	0	0	0	0	10	0	0	0	0	0	0	0	0	0	0	0	0	0	0	0	0	0	32	0	0	0	0	0	0	0	0	0	0	0
OTU_350	Eukaryota	Alveolata	Apicomplexa	Apicomplexa_X	Gregarines	Gregarines_X	Gregarines_XX	Gregarines_XX_sp.	0	0	0	0	0	0	0	0	0	0	0	0	0	0	6	19	0	0	0	0	0	0	1	5	0	0	0	0	0	0	0	0	0	0
OTU_352	Eukaryota	Alveolata	Ciliophora	Phyllopharyngea	Suctoria	Suctoria_X	Hypocoma	Hypocoma_acinetarum	0	0	0	0	0	0	0	0	0	0	0	0	0	0	0	0	0	0	0	0	0	0	0	0	0	0	0	1	0	0	0	0	0	0
OTU_353	Eukaryota	Alveolata	Ciliophora	Oligohymenophorea	Peritrichia	Zoothamniidae	Zoothamnium	Zoothamnium_arbuscula	0	0	0	0	0	0	7	3	0	0	0	4	0	0	0	0	0	0	0	0	0	0	0	0	0	0	0	0	0	0	0	0	0	0
OTU_355	Eukaryota	Alveolata	Dinophyta	Dinophyceae	Dinophyceae_X	Dinophyceae_XX	Warnowia	Warnowia_sp.	22	0	0	0	0	0	11	0	0	0	0	0	0	0	0	0	0	0	0	0	0	0	0	0	0	0	0	0	0	0	0	0	0	0
OTU_358	Eukaryota	Rhizaria	Cercozoa	Filosa-Thecofilosea	Cryomonadida	Protaspa-lineage	Protaspa-lineage_X	Protaspa-lineage_X_sp.	0	0	0	0	8	0	0	0	0	0	3	0	0	0	9	1	0	0	0	0	0	0	2	3	1	1	0	0	0	0	0	0	0	0
OTU_359	Eukaryota	Alveolata	Apicomplexa	Apicomplexa_X	Gregarines	Gregarines_X	Gregarines_XX	Gregarines_XX_sp.	0	0	0	0	0	0	0	0	0	0	0	0	0	0	1	38	0	0	0	0	0	0	0	0	0	0	0	0	0	0	0	0	0	0
OTU_360	Eukaryota	Archaeplastida	Rhodophyta	Florideophyceae	Acrochaetiales	Acrochaetiales_X	Rhodochorton	Rhodochorton_purpureum	0	0	0	0	0	0	0	0	0	0	0	0	0	0	0	27	0	0	0	0	0	0	0	0	0	0	0	0	0	0	0	0	0	0
OTU_368	Eukaryota	Alveolata	Ciliophora	Spirotrichea	Hypotrichia	Hypotrichia_X	Hypotrichia_XX	Hypotrichia_XX_sp.	0	0	0	0	0	0	38	0	0	0	0	0	0	0	0	0	0	0	0	0	0	0	0	0	0	0	0	0	0	0	0	0	0	0
OTU_370	Eukaryota	Stramenopiles	Stramenopiles_X	Labyrinthulea	Labyrinthulales	Labyrinthulaceae	Labyrinthula	Labyrinthula_sp.	0	0	0	0	0	0	0	0	0	0	0	0	0	0	0	0	0	0	0	0	0	0	0	0	0	0	0	0	0	2	0	0	0	0
OTU_372	Eukaryota	Alveolata	Dinophyta	Dinophyceae	Dinophyceae_X	Dinophyceae_XX	Dinophyceae_XXX	Dinophyceae_XXX_sp.	0	0	0	0	0	0	0	0	17	0	0	0	0	0	0	0	0	0	0	0	0	6	0	0	0	0	0	0	0	0	0	0	0	0
OTU_373	Eukaryota	Rhizaria	Cercozoa	Filosa-Thecofilosea	Cryomonadida	Protaspa-lineage	Protaspa-lineage_X	Protaspa-lineage_X_sp.	0	0	0	0	0	0	0	1	0	0	0	0	0	0	0	0	0	0	0	0	0	0	6	9	0	0	0	1	0	0	1	0	0	0
OTU_374	Eukaryota	Alveolata	Dinophyta	Dinophyceae	Suessiales	Suessiales_X	Suessiales_XX	Suessiales_XX_sp.	0	1	1	3	0	0	0	4	3	0	0	1	1	3	0	0	0	0	0	1	0	0	0	0	0	0	0	5	2	4	1	0	4	0
OTU_375	Eukaryota	Rhizaria	Cercozoa	Filosa-Thecofilosea	Cryomonadida	Protaspa-lineage	Protaspa-lineage_X	Protaspa-lineage_X_sp.	0	0	0	0	0	0	0	0	0	0	0	0	0	0	0	0	0	0	0	0	0	0	0	0	0	0	0	22	0	0	0	0	0	0
OTU_377	Eukaryota	Alveolata	Dinophyta	Dinophyceae	Dinophyceae_X	Dinophyceae_XX	Gymnodinium	Multi-affiliation	0	0	0	0	0	0	0	0	0	0	0	0	0	0	0	0	0	0	0	0	0	0	0	0	0	0	0	0	0	0	0	0	1	0
OTU_379	Eukaryota	Alveolata	Dinophyta	Dinophyceae	Dinophyceae_X	Dinophyceae_XX	Durinskia	Durinskia_baltica	0	23	0	0	0	11	0	0	0	0	0	0	0	0	0	0	0	0	0	0	0	0	0	0	0	0	0	0	0	0	0	0	0	0
OTU_385	Eukaryota	Alveolata	Apicomplexa	Apicomplexa_X	Gregarines	Gregarines_X	Gregarines_XX	Gregarines_XX_sp.	0	0	0	0	0	0	0	0	0	0	0	0	0	0	0	7	0	0	0	0	0	0	0	8	0	0	0	0	0	0	0	0	0	0
OTU_386	Eukaryota	Multi-affiliation	Multi-affiliation	Multi-affiliation	Multi-affiliation	Multi-affiliation	Multi-affiliation	Multi-affiliation	0	0	0	0	0	0	0	0	1	0	0	0	0	0	0	0	0	0	0	0	0	0	0	0	0	0	0	2	3	4	0	0	1	0
OTU_389	Eukaryota	Multi-affiliation	Multi-affiliation	Multi-affiliation	Multi-affiliation	Multi-affiliation	Multi-affiliation	Multi-affiliation	0	0	0	0	0	0	0	0	0	0	0	0	0	0	0	0	0	0	0	0	4	0	0	0	0	0	0	0	0	0	0	0	0	0
OTU_390	Eukaryota	Archaeplastida	Chlorophyta	Ulvophyceae	Multi-affiliation	Multi-affiliation	Multi-affiliation	Multi-affiliation	0	0	0	0	0	0	0	0	0	0	0	0	0	0	17	12	1	0	0	0	0	1	0	0	0	0	0	0	5	0	0	0	0	0
OTU_391	Eukaryota	Rhizaria	Cercozoa	Filosa-Thecofilosea	Cryomonadida	Protaspa-lineage	Protaspa-lineage_X	Protaspa-lineage_X_sp.	0	0	7	2	0	0	0	5	0	0	0	0	0	0	0	0	0	0	0	0	1	6	0	1	0	0	0	0	0	8	0	0	0	2
OTU_395	Eukaryota	Stramenopiles	Stramenopiles_X	Bicoecea	Anoecales	Caecitellaceae	Caecitellus	Caecitellus_parvulus	0	0	0	0	0	0	0	0	0	0	0	0	0	0	0	0	0	0	0	0	0	1	0	0	0	0	0	0	0	0	0	0	0	0
OTU_397	Eukaryota	Alveolata	Dinophyta	Dinophyceae	Dinophyceae_X	Dinophyceae_XX	Gymnodinium	Gymnodinium_dorsalisulcum	0	0	0	0	0	0	0	0	0	0	0	0	0	0	0	0	0	0	0	0	0	17	0	0	0	0	0	0	0	0	0	0	0	0
OTU_398	Eukaryota	Stramenopiles	Stramenopiles_X	Labyrinthulea	Labyrinthulales	Labyrinthulaceae	Labyrinthulaceae_X	Labyrinthulaceae_X_sp.	0	0	0	0	0	0	0	0	0	0	0	0	0	0	0	0	0	0	0	0	0	0	6	0	0	0	0	0	0	0	0	0	0	0
OTU_400	Eukaryota	Stramenopiles	Ochrophyta	Bacillariophyta	Bacillariophyta_X	Raphid-pennate	Navicula	Navicula_glaciei	0	0	0	0	0	0	0	0	0	0	0	1	0	0	0	2	0	0	0	0	0	0	8	12	0	0	0	0	0	0	0	0	0	0
OTU_403	Eukaryota	Alveolata	Dinophyta	Dinophyceae	Dinophyceae_X	Dinophyceae_XX	Prorocentrum	Prorocentrum_lima	0	0	0	0	0	0	0	0	0	0	0	0	0	0	0	0	0	0	0	0	0	0	11	0	0	0	0	0	6	0	5	0	0	0
OTU_406	Eukaryota	Stramenopiles	Ochrophyta	Bacillariophyta	Bacillariophyta_X	Raphid-pennate	Cocconeis	Cocconeis_stauroneiformis	0	0	0	0	0	0	0	0	0	1	0	0	0	0	0	0	0	0	0	0	0	0	3	27	0	0	0	0	0	0	0	0	0	0
OTU_407	Eukaryota	Alveolata	Ciliophora	Phyllopharyngea	Suctoria	Suctoria_X	Suctoria_XX	Suctoria_XX_sp.	0	0	0	0	0	1	8	0	0	0	0	0	0	0	0	0	6	0	0	0	0	0	0	0	7	0	0	0	0	0	0	0	0	0
OTU_408	Eukaryota	Alveolata	Ciliophora	Oligohymenophorea	Sessilida	Vorticellidae	Pseudovorticella	Pseudovorticella_punctata	0	0	0	0	0	0	0	0	0	0	0	0	0	0	0	0	0	0	0	0	0	6	0	0	0	0	0	0	10	0	0	13	0	0
OTU_411	Eukaryota	Alveolata	Dinophyta	Dinophyceae	Dinophyceae_X	Dinophyceae_XX	Gymnodinium	Gymnodinium_dorsalisulcum	0	1	1	0	0	0	0	0	0	0	0	1	2	0	0	0	0	0	0	0	0	0	0	0	0	0	0	0	8	2	2	0	5	5
OTU_413	Eukaryota	Alveolata	Dinophyta	Syndiniales	Dino-Group-II	Dino-Group-II-Clade-17	Dino-Group-II-Clade-17_X	Dino-Group-II-Clade-17_X_sp.	0	0	0	0	0	0	0	0	0	0	0	0	2	0	0	0	0	0	0	0	11	0	0	0	0	0	0	0	0	0	0	0	0	0
OTU_414	Eukaryota	Alveolata	Dinophyta	Dinophyceae	Multi-affiliation	Multi-affiliation	Multi-affiliation	Multi-affiliation	0	0	0	0	0	0	0	0	25	0	0	0	0	0	0	0	0	0	0	0	0	0	0	0	0	0	0	0	0	0	0	0	0	0
OTU_415	Eukaryota	Stramenopiles	Ochrophyta	Bacillariophyta	Bacillariophyta_X	Raphid-pennate	Navicula	Navicula_perminuta	0	0	0	0	0	0	0	0	0	0	0	0	0	0	0	0	0	0	0	0	0	0	29	0	0	0	0	0	0	0	0	0	0	0
OTU_417	Eukaryota	Rhizaria	Cercozoa	Filosa-Thecofilosea	Cryomonadida	Protaspa-lineage	Protaspa-lineage_X	Protaspa-lineage_X_sp.	0	0	0	0	4	0	0	0	0	0	0	0	0	0	2	0	0	0	0	1	0	0	0	5	0	0	0	0	0	0	0	0	0	0
OTU_420	Eukaryota	Stramenopiles	Ochrophyta	Chrysophyceae	Chrysophyceae_X	Chrysophyceae_Clade-F	Clade-F_X	Clade-F_X_sp.	0	0	0	0	0	0	0	0	0	0	0	0	0	0	0	0	0	0	0	0	0	0	0	0	0	0	0	1	0	0	0	0	0	0
OTU_422	Eukaryota	Stramenopiles	Ochrophyta	Bacillariophyta	Bacillariophyta_X	Araphid-pennate	Multi-affiliation	Multi-affiliation	1	0	0	0	0	4	0	0	0	0	12	0	0	0	0	0	0	2	7	0	0	0	0	0	2	0	0	0	0	0	0	0	0	0
OTU_423	Eukaryota	Stramenopiles	Ochrophyta	Bacillariophyta	Bacillariophyta_X	Polar-centric-Mediophyceae	Cyclotella	Multi-affiliation	2	0	0	0	0	3	4	0	0	5	1	0	0	0	2	0	3	3	0	0	0	0	0	0	0	1	2	0	0	0	0	0	0	0
OTU_430	Eukaryota	Alveolata	Dinophyta	Dinophyceae	Dinophyceae_X	Dinophyceae_XX	Gymnodinium	Gymnodinium_dorsalisulcum	0	0	0	0	0	0	0	0	0	0	0	0	0	0	0	0	0	0	0	0	29	0	0	0	0	0	0	0	0	0	0	0	0	0
OTU_432	Eukaryota	Stramenopiles	Ochrophyta	Bacillariophyta	Bacillariophyta_X	Raphid-pennate	Placoneis	Placoneis_elginensis	0	0	0	0	0	0	0	0	0	0	0	0	0	0	0	0	0	0	0	0	0	0	10	0	0	0	0	0	0	0	0	1	0	0
OTU_436	Eukaryota	Stramenopiles	Ochrophyta	Bacillariophyta	Bacillariophyta_X	Polar-centric-Mediophyceae	Multi-affiliation	Multi-affiliation	0	0	0	0	0	0	0	0	0	0	0	0	0	0	1	2	0	0	0	0	0	0	3	12	0	0	0	0	0	0	0	0	0	0
OTU_440	Eukaryota	Multi-affiliation	Multi-affiliation	Multi-affiliation	Multi-affiliation	Multi-affiliation	Multi-affiliation	Multi-affiliation	1	0	0	0	0	0	0	0	0	15	0	0	0	0	0	2	2	0	0	0	0	0	0	0	0	0	0	0	0	0	0	0	0	0
OTU_441	Eukaryota	Alveolata	Dinophyta	Dinophyceae	Dinophyceae_X	Dinophyceae_XX	Multi-affiliation	Multi-affiliation	1	0	0	0	0	8	0	0	0	2	0	0	0	0	0	0	0	2	0	0	0	0	0	0	0	3	0	0	0	0	0	0	0	0
OTU_446	Eukaryota	Alveolata	Dinophyta	Dinophyceae	Dinophyceae_X	Dinophyceae_XX	Dinophyceae_XXX	Dinophyceae_XXX_sp.	0	0	3	0	0	0	0	0	0	0	0	2	0	5	0	0	0	0	0	0	0	4	0	0	0	0	0	9	0	21	0	2	0	0
OTU_447	Eukaryota	Archaeplastida	Chlorophyta	Ulvophyceae	Ulotrichales	Ulotrichales_X	Capsosiphon	Capsosiphon_fulvescens	0	16	0	0	0	0	0	0	3	0	0	0	0	0	0	0	0	0	0	0	0	2	0	0	0	0	0	0	0	0	0	0	0	0
OTU_449	Eukaryota	Alveolata	Dinophyta	Dinophyceae	Dinophyceae_X	Dinophyceae_XX	Dinophyceae_XXX	Dinophyceae_XXX_sp.	0	0	0	0	15	0	0	0	0	0	0	0	0	0	0	0	0	0	0	0	0	0	0	5	0	0	0	0	0	0	0	0	0	0
OTU_450	Eukaryota	Alveolata	Dinophyta	Syndiniales	Dino-Group-II	Dino-Group-II-Clade-3	Dino-Group-II-Clade-3_X	Dino-Group-II-Clade-3_X_sp.	0	0	0	0	0	0	0	0	0	0	0	0	3	0	0	0	0	0	0	0	0	20	0	0	0	0	0	0	0	0	0	0	0	0
OTU_451	Eukaryota	Rhizaria	Cercozoa	Endomyxa	Vampyrellida	Vampyrellida_X	Thalassomyxa	Thalassomyxa_sp.	0	0	0	0	0	0	0	0	0	0	0	0	0	0	0	0	0	0	0	0	0	0	23	0	0	0	0	0	0	0	0	0	0	0
OTU_452	Eukaryota	Alveolata	Ciliophora	Phyllopharyngea	Cyrtophoria	Dysteriidae	Microdysteria	Microdysteria_decora	0	0	0	0	0	0	0	0	0	0	0	0	0	0	0	0	0	0	0	0	0	0	0	0	0	0	0	0	25	0	0	0	0	0
OTU_454	Eukaryota	Multi-affiliation	Multi-affiliation	Multi-affiliation	Multi-affiliation	Multi-affiliation	Multi-affiliation	Multi-affiliation	0	0	0	0	0	0	0	0	0	0	0	0	0	0	0	0	0	0	0	0	0	0	0	0	0	0	0	0	25	0	0	0	0	0
OTU_456	Eukaryota	Alveolata	Dinophyta	Dinophyceae	Dinophyceae_X	Dinophyceae_XX	Dinophyceae_XXX	Dinophyceae_XXX_sp.	0	0	0	0	0	0	0	0	0	0	0	0	0	0	0	25	0	0	0	0	0	0	0	0	0	0	0	0	0	0	0	0	0	0
OTU_457	Eukaryota	Stramenopiles	Stramenopiles_X	Labyrinthulea	Thraustochytriales	Thraustochytriaceae	Thraustochytriaceae_X	Thraustochytriaceae_X_sp.	2	0	0	0	0	0	0	0	0	0	0	0	0	0	4	0	0	0	0	0	0	0	0	18	0	0	0	0	0	0	0	0	0	0
OTU_460	Eukaryota	Alveolata	Dinophyta	Dinophyceae	Dinophyceae_X	Dinophyceae_XX	Multi-affiliation	Multi-affiliation	0	0	0	0	0	0	0	0	0	0	0	0	0	0	0	3	0	0	0	0	0	0	0	9	9	0	0	0	0	0	0	0	0	0
OTU_469	Eukaryota	Alveolata	Ciliophora	Phyllopharyngea	Suctoria	Suctoria_X	Suctoria_XX	Suctoria_XX_sp.	0	0	0	0	0	0	0	0	0	0	0	0	0	0	0	0	0	0	0	0	0	0	0	0	21	0	0	0	0	0	0	0	0	0
OTU_470	Eukaryota	Alveolata	Dinophyta	Dinophyceae	Dinophyceae_X	Pfiesteriaceae	Pfiesteriaceae_X	Pfiesteriaceae_X_sp	0	0	0	0	0	16	0	0	0	0	0	0	0	0	0	0	0	6	0	0	1	0	0	0	0	0	0	0	0	0	0	0	0	0
OTU_473	Eukaryota	Alveolata	Dinophyta	Syndiniales	Dino-Group-II	Dino-Group-II-Clade-4	Dino-Group-II-Clade-4_X	Dino-Group-II-Clade-4_X_sp.	0	0	0	0	0	0	0	0	0	0	0	0	0	0	9	0	0	0	0	0	0	0	9	0	0	0	0	0	0	0	0	0	0	0
OTU_474	Eukaryota	Stramenopiles	Ochrophyta	Bacillariophyta	Bacillariophyta_X	Polar-centric-Mediophyceae	Thalassiosira	Thalassiosira_delicatula	0	0	0	0	0	0	0	0	0	0	0	0	0	0	1	0	0	0	0	0	0	0	0	4	5	0	0	0	0	0	0	0	0	0
OTU_475	Eukaryota	Amoebozoa	Lobosa	Tubulinea	Echinamoebida	Vermamoebidae	Hartmannella	Hartmannella_abertawensis	0	0	0	0	0	0	0	0	0	0	0	0	8	0	0	0	0	0	0	0	0	0	15	0	0	0	0	0	0	0	0	0	0	0
OTU_476	Eukaryota	Rhizaria	Cercozoa	Filosa-Imbricatea	Filosa-Imbricatea_X	Filosa-Imbricatea_XX	Filosa-Imbricatea_XXX	Multi-affiliation	0	0	0	0	0	2	0	0	0	7	0	0	0	0	0	0	2	0	0	0	0	0	0	0	0	1	0	0	0	0	0	0	0	0
OTU_480	Eukaryota	Alveolata	Ciliophora	Phyllopharyngea	Suctoria	Acinetidae	Acineta	Acineta_sp.	9	0	0	0	0	0	0	0	0	0	0	0	0	0	0	0	0	0	0	0	0	0	0	0	2	0	0	0	0	0	0	0	0	0
OTU_485	Eukaryota	Alveolata	Dinophyta	Dinophyceae	Suessiales	Suessiales_X	Woloszynskia	Woloszynskia_sp._strain1	0	0	0	0	0	0	0	1	6	0	0	0	0	0	0	0	0	0	0	0	0	0	0	0	0	0	3	0	1	0	2	0	0	0
OTU_486	Eukaryota	Alveolata	Dinophyta	Syndiniales	Dino-Group-II	Dino-Group-II-Clade-32	Dino-Group-II-Clade-32_X	Dino-Group-II-Clade-32_X_sp.	0	0	0	0	0	5	0	0	0	0	0	0	0	0	0	0	0	0	15	0	0	0	0	0	4	0	0	0	0	0	0	0	0	0
OTU_488	Eukaryota	Alveolata	Dinophyta	Dinophyceae	Dinophyceae_X	Dinophyceae_XX	Gymnodinium	Gymnodinium_aureolum	0	0	24	0	0	0	0	0	0	0	0	0	0	0	0	0	0	0	0	0	0	0	0	0	0	0	0	0	0	0	0	0	0	0
OTU_492	Eukaryota	Apusozoa	Apusomonadidae	Apusomonadidae_Group-2	Apusomonadidae_Group-2B	Apusomonadidae_Group-2B_X	Apusomonadidae_Group-2B_XX	Apusomonadidae_Group-2B_XX_sp.	0	0	0	0	0	0	0	0	0	0	0	0	0	0	0	0	0	0	0	0	0	5	0	0	0	0	0	0	0	0	3	0	0	0
OTU_499	Eukaryota	Archaeplastida	Chlorophyta	Chlorodendrophyceae	Chlorodendrales	Chlorodendraceae	Tetraselmis	Multi-affiliation	4	0	0	0	0	0	0	0	0	0	0	0	0	0	0	0	0	0	0	0	6	0	0	1	0	0	0	0	0	0	9	0	0	0
OTU_502	Eukaryota	Stramenopiles	Ochrophyta	Bacillariophyta	Bacillariophyta_X	Polar-centric-Mediophyceae	Multi-affiliation	Multi-affiliation	0	0	0	0	0	0	0	0	0	0	0	0	0	0	0	0	0	0	0	0	0	2	0	0	0	0	0	0	0	0	0	8	0	0
OTU_503	Eukaryota	Alveolata	Dinophyta	Dinophyceae	Dinophyceae_X	Dinophyceae_XX	Dinophyceae_XXX	Dinophyceae_XXX_sp.	0	8	0	0	0	0	0	0	0	0	0	0	0	0	0	0	0	0	0	0	0	0	0	0	0	0	0	0	0	0	0	0	0	0
OTU_505	Eukaryota	Rhizaria	Cercozoa	Filosa-Thecofilosea	Cryomonadida	Cryomonadida_X	Cryomonadida_XX	Cryomonadida_XX_sp.	3	0	0	0	0	0	3	0	0	2	1	0	0	0	0	0	0	0	0	0	0	0	0	0	9	0	0	0	0	0	0	0	0	0
OTU_506	Eukaryota	Stramenopiles	Ochrophyta	Bacillariophyta	Bacillariophyta_X	Raphid-pennate	Achnanthes	Achnanthes_bongranii	0	2	0	0	0	0	0	5	0	0	0	0	0	0	0	0	1	0	0	0	0	0	10	0	0	0	0	0	0	0	2	0	1	0
OTU_507	Eukaryota	Rhizaria	Cercozoa	Filosa-Imbricatea	Euglyphida	Paulinellidae	Paulinella	Paulinella_sp._strain1	0	0	0	0	0	13	0	0	0	5	0	0	0	0	0	0	0	2	0	0	0	0	0	0	0	0	0	0	0	0	0	0	0	0
OTU_509	Eukaryota	Alveolata	Apicomplexa	Apicomplexa_X	Apicomplexa_XX	Apicomplexa_XXX	Apicomplexa_XXXX	Apicomplexa_XXXX_sp.	0	0	0	0	0	0	0	0	0	0	0	0	0	0	0	0	0	0	0	0	0	0	0	26	0	0	0	0	0	0	0	0	0	0
OTU_511	Eukaryota	Alveolata	Ciliophora	Phyllopharyngea	Phyllopharyngea_X	Phyllopharyngea_XX	Phyllopharyngea_XXX	Phyllopharyngea_XXX_sp.	0	1	0	3	0	0	2	0	3	0	0	0	0	4	0	0	0	0	0	0	0	0	0	0	0	0	0	0	0	0	0	0	0	0
OTU_512	Eukaryota	Opisthokonta	Fungi	Ascomycota	Pezizomycotina	Sordariomycetes	Sordariomycetes_X	Sordariomycetes_X_sp.	0	0	0	0	0	0	0	0	0	0	0	0	0	0	0	0	0	0	0	0	0	0	0	0	0	0	0	0	0	0	0	0	0	7
OTU_515	Eukaryota	Stramenopiles	Stramenopiles_X	Labyrinthulea	Labyrinthulales	Labyrinthulaceae	Labyrinthulaceae_X	Labyrinthulaceae_X_sp.	0	0	0	0	0	0	0	0	0	0	0	0	0	0	0	0	0	0	0	4	0	0	0	0	0	0	0	0	0	0	0	0	0	0
OTU_520	Eukaryota	Alveolata	Ciliophora	Oligohymenophorea	Scuticociliatia	Scuticociliatia_X	Scuticociliatia_XX	Scuticociliatia_XX_sp.	0	0	0	0	0	0	0	0	0	0	0	0	0	0	0	0	0	0	17	0	0	0	0	0	0	0	0	0	0	0	0	0	0	0
OTU_523	Eukaryota	Opisthokonta	Choanoflagellida	Choanoflagellatea	Craspedida	Monosigidae_Group_B	Monosigidae_Group_B_X	Monosigidae_Group_B_X_sp.	0	0	0	0	0	0	0	0	0	0	0	0	0	0	0	0	0	0	0	0	0	0	0	0	0	0	0	0	3	0	0	1	0	0
OTU_524	Eukaryota	Stramenopiles	Ochrophyta	Bacillariophyta	Bacillariophyta_X	Raphid-pennate	Multi-affiliation	Multi-affiliation	0	0	0	0	5	2	4	0	0	0	1	0	0	0	0	0	5	0	0	0	0	0	0	0	0	0	0	0	0	0	0	0	0	0
OTU_527	Eukaryota	Opisthokonta	Mesomycetozoa	Ichthyosporea	Ichthyosphonida	Ichthyosphonida_X	Ichthyosphonida_XX	Ichthyosphonida_XX_sp.	5	0	0	0	0	0	0	0	0	0	0	0	0	0	0	0	0	0	0	0	0	0	0	0	0	0	0	0	0	0	0	0	0	0
OTU_528	Eukaryota	Alveolata	Apicomplexa	Apicomplexa_X	Novel-Apicomplexa-Class-1	Novel-Apicomplexa-Class-1_X	Novel-Apicomplexa-Class-1_XX	Novel-Apicomplexa-Class-1_XX_sp.	0	0	0	0	0	0	1	0	0	0	0	0	0	0	7	2	0	0	0	0	0	0	0	0	10	0	0	0	0	0	0	0	0	0
OTU_529	Eukaryota	Alveolata	Dinophyta	Dinophyceae	Dinophyceae_X	Multi-affiliation	Multi-affiliation	Multi-affiliation	12	0	0	0	0	2	0	0	0	0	0	0	0	0	0	0	0	0	0	0	0	0	0	0	0	4	0	0	0	0	0	0	0	0
OTU_530	Eukaryota	Alveolata	Apicomplexa	Apicomplexa_X	Gregarines	Gregarines_X	Selenidium	Selenidium_serpulae	0	0	0	0	2	0	0	0	0	0	0	0	0	0	0	0	0	0	0	0	0	0	0	7	0	4	0	0	0	0	0	0	0	0
OTU_533	Eukaryota	Alveolata	Dinophyta	Dinophyceae	Dinophyceae_X	Pfiesteriaceae	Multi-affiliation	Multi-affiliation	0	0	0	2	0	1	0	0	0	0	0	0	0	0	0	0	0	0	2	0	0	0	1	1	0	0	0	1	0	0	0	0	1	4
OTU_538	Eukaryota	Stramenopiles	Ochrophyta	Phaeophyceae	Phaeophyceae_X	Phaeophyceae_XX	Ectocarpus	Multi-affiliation	0	0	0	0	0	0	0	0	0	0	0	0	0	0	1	0	2	0	3	0	0	0	4	3	0	0	0	0	0	0	0	0	1	0
OTU_539	Eukaryota	Alveolata	Apicomplexa	Apicomplexa_X	Gregarines	Gregarines_X	Gregarines_XX	Gregarines_XX_sp.	0	0	0	0	0	0	0	0	0	0	0	0	0	0	16	0	0	0	0	0	0	0	0	0	0	0	0	0	0	0	0	0	0	0
OTU_540	Eukaryota	Alveolata	Ciliophora	Spirotrichea	Choreotrichia	Multi-affiliation	Multi-affiliation	Multi-affiliation	0	0	0	0	0	0	3	0	0	0	0	0	0	0	0	0	9	0	2	0	0	0	0	0	0	0	0	0	0	0	0	0	0	0
OTU_541	Eukaryota	Alveolata	Ciliophora	Spirotrichea	Euplotia	Uronychiidae	Diophrys	Diophrys_sp.	0	0	0	0	0	0	4	0	0	0	0	0	0	0	0	0	0	0	0	0	0	0	0	0	0	0	0	0	0	0	0	0	13	0
OTU_544	Eukaryota	Stramenopiles	Stramenopiles_X	MAST	MAST-11	MAST-11_X	MAST-11_XX	MAST-11_XX_sp.	0	0	0	0	0	0	0	0	0	0	0	0	0	0	5	0	0	0	0	0	0	0	0	4	0	0	0	0	0	0	0	0	0	0
OTU_545	Eukaryota	Rhizaria	Cercozoa	Filosa-Thecofilosea	Ventricleftida	Ventricleftida_X	Ventricleftida_XX	Ventricleftida_XX_sp.	0	0	0	0	0	0	0	0	0	0	0	0	0	0	0	0	0	0	0	0	0	0	0	0	0	0	0	0	0	0	3	0	0	0
OTU_546	Eukaryota	Stramenopiles	Stramenopiles_X	Oomycota	Oomycota_X	Leptomitales	Leptomitales_X	Leptomitales_X_sp.	0	0	0	0	0	0	0	0	0	0	0	0	0	0	0	21	0	0	0	0	0	0	0	0	0	0	0	0	0	0	0	0	0	0
OTU_547	Eukaryota	Archaeplastida	Chlorophyta	Chlorophyceae	Sphaeropleales	Sphaeropleales_X	Tetranephris	Tetranephris_brasiliensis	0	0	0	0	0	0	0	0	0	0	0	0	0	0	13	0	0	0	0	0	0	0	0	3	0	0	0	0	0	0	0	0	0	0
OTU_551	Eukaryota	Alveolata	Dinophyta	Syndiniales	Dino-Group-I	Dino-Group-I-Clade-4	Dino-Group-I-Clade-4_X	Dino-Group-I-Clade-4_X_sp.	0	0	0	0	0	0	0	0	0	0	0	0	0	0	0	3	9	3	1	0	0	0	0	0	0	0	0	0	0	0	0	0	0	0
OTU_552	Eukaryota	Stramenopiles	Ochrophyta	Bacillariophyta	Bacillariophyta_X	Raphid-pennate	Raphid-pennate_X	Raphid-pennate_X_sp.	0	0	0	0	0	0	0	0	0	0	0	0	0	0	0	0	0	0	0	0	0	0	0	6	0	0	0	0	0	0	0	0	0	0
OTU_555	Eukaryota	Alveolata	Dinophyta	Dinophyceae	Dinophyceae_X	Dinophyceae_XX	Dinophyceae_XXX	Dinophyceae_XXX_sp.	0	0	0	0	0	0	0	0	0	0	0	0	0	0	0	0	0	0	0	0	9	0	0	0	0	0	0	0	8	0	0	0	0	0
OTU_563	Eukaryota	Archaeplastida	Chlorophyta	Ulvophyceae	Ulotrichales	Ulotrichales_X	Gayralia	Gayralia_sp.	0	0	0	0	0	0	0	0	0	0	0	0	0	0	0	16	0	0	0	0	0	0	0	2	0	0	0	0	0	0	0	0	0	0
OTU_565	Eukaryota	Alveolata	Dinophyta	Syndiniales	Dino-Group-I	Dino-Group-I-Clade-4	Euduboscquella	Euduboscquella_crenulata	1	0	0	0	0	0	0	0	0	0	0	0	0	0	0	0	0	6	0	0	0	0	0	0	8	0	0	0	0	0	0	0	0	0
OTU_566	Eukaryota	Alveolata	Ciliophora	Oligohymenophorea	Sessilida	Vorticellidae	Vorticellidae_X	Vorticellidae_X_sp.	0	0	0	0	0	0	0	0	0	0	4	1	0	0	0	0	0	0	0	0	0	0	0	0	0	0	0	0	0	0	0	0	0	0
OTU_568	Eukaryota	Alveolata	Dinophyta	Syndiniales	Dino-Group-II	Dino-Group-II-Clade-2	Dino-Group-II-Clade-2_X	Dino-Group-II-Clade-2_X_sp.	0	0	0	0	0	0	0	0	0	0	0	0	0	0	0	0	0	0	0	0	0	0	0	12	0	4	0	0	0	0	0	0	0	0
OTU_571	Eukaryota	Alveolata	Dinophyta	Dinophyceae	Suessiales	Suessiales_X	Woloszynskia	Woloszynskia_sp._strain1	4	0	0	0	0	0	0	0	0	0	0	0	0	0	0	0	2	0	1	0	0	0	0	0	0	0	0	0	0	0	0	0	0	0
OTU_573	Eukaryota	Alveolata	Dinophyta	Dinophyceae	Dinophyceae_X	Dinophyceae_XX	Multi-affiliation	Multi-affiliation	0	0	0	1	0	0	0	0	1	0	0	1	1	1	0	0	0	0	0	0	0	4	0	0	0	0	0	0	3	2	0	0	2	0
OTU_577	Eukaryota	Alveolata	Dinophyta	Syndiniales	Dino-Group-II	Dino-Group-II-Clade-17	Dino-Group-II-Clade-17_X	Dino-Group-II-Clade-17_X_sp.	0	0	0	0	0	0	0	0	0	0	0	0	0	0	0	0	0	0	0	0	0	0	0	0	0	0	0	0	6	0	0	0	0	0
OTU_578	Eukaryota	Opisthokonta	Mesomycetozoa	Ichthyosporea	Ichthyosphonida	Abeoformidae_Group_MAIP_1	Abeoformidae_Group_MAIP_1_X	Abeoformidae_Group_MAIP_1_X_sp.	0	0	0	0	0	0	0	0	0	0	0	0	0	0	0	12	0	0	0	0	0	0	2	0	0	0	0	0	0	0	0	0	0	0
OTU_579	Eukaryota	Alveolata	Dinophyta	Dinophyceae	Dinophyceae_X	Dinophyceae_XX	Dinophyceae_XXX	Dinophyceae_XXX_sp.	0	0	0	0	0	0	0	0	0	0	0	0	1	1	0	0	0	0	0	0	2	0	0	0	0	0	1	1	0	0	1	1	3	2
OTU_582	Eukaryota	Alveolata	Apicomplexa	Apicomplexa_X	Gregarines	Gregarines_X	Gregarinidae	Gregarinidae_sp.	0	0	0	0	0	0	18	0	0	0	1	0	0	0	0	0	0	0	0	0	0	4	0	0	0	0	0	0	0	0	0	0	0	0
OTU_583	Eukaryota	Stramenopiles	Stramenopiles_X	Labyrinthulea	Labyrinthulales	Labyrinthulaceae	Aplanochytrium	Multi-affiliation	0	0	2	0	0	0	0	0	2	0	0	0	0	0	0	0	0	0	0	0	0	1	0	0	0	0	0	0	0	0	0	0	0	0
OTU_586	Eukaryota	Multi-affiliation	Multi-affiliation	Multi-affiliation	Multi-affiliation	Multi-affiliation	Multi-affiliation	Multi-affiliation	0	0	0	0	0	0	0	0	0	0	0	0	0	0	0	0	0	0	0	0	0	11	0	0	0	0	0	0	0	0	0	0	0	0
OTU_587	Eukaryota	Alveolata	Dinophyta	Dinophyceae	Suessiales	Suessiales_X	Woloszynskia	Woloszynskia_sp._strain1	1	0	0	3	0	0	0	1	0	0	0	0	0	0	0	0	1	0	0	0	0	0	0	0	0	0	0	3	0	0	0	0	0	0
OTU_591	Eukaryota	Stramenopiles	Ochrophyta	Bacillariophyta	Bacillariophyta_X	Polar-centric-Mediophyceae	Chaetoceros	Chaetoceros_calcitrans	1	6	0	0	3	0	0	0	0	0	0	0	0	0	0	0	0	0	0	0	0	0	0	0	0	0	0	0	0	0	0	0	0	0
OTU_596	Eukaryota	Stramenopiles	Ochrophyta	Bacillariophyta	Bacillariophyta_X	Raphid-pennate	Pleurosigma	Pleurosigma_sp.	11	0	0	0	0	0	0	0	0	0	0	0	0	0	0	0	2	0	0	0	0	0	0	1	0	4	0	0	0	0	0	0	0	0
OTU_598	Eukaryota	Alveolata	Ciliophora	Oligohymenophorea	Peritrichia	Zoothamniidae	Zoothamnium	Zoothamnium_sp.	0	0	0	0	0	0	0	0	0	0	0	11	0	0	0	0	0	0	0	0	0	0	0	0	0	0	0	0	0	0	0	0	0	0
OTU_603	Eukaryota	Alveolata	Dinophyta	Dinophyceae	Suessiales	Suessiales_X	Woloszynskia	Woloszynskia_sp._strain1	5	0	0	0	0	1	0	0	0	0	4	0	0	0	0	0	0	0	0	0	0	0	0	0	0	2	0	0	0	0	0	0	0	0
OTU_605	Eukaryota	Apusozoa	Apusomonadidae	Apusomonadidae_Group-2	Apusomonadidae_Group-2B	Apusomonadidae_Group-2B_X	Apusomonadidae_Group-2B_XX	Apusomonadidae_Group-2B_XX_sp.	0	0	0	0	0	0	0	0	0	0	0	0	0	0	0	0	0	0	0	0	0	6	0	0	0	0	0	0	0	0	0	0	0	0
OTU_606	Eukaryota	Hacrobia	Cryptophyta	Cryptophyceae	Cryptophyceae_X	Cryptomonadales	Multi-affiliation	Multi-affiliation	0	0	0	0	0	0	0	0	0	0	0	0	0	0	0	0	2	0	0	0	0	0	0	0	0	0	0	0	0	0	0	0	0	0
OTU_612	Eukaryota	Alveolata	Dinophyta	Dinophyceae	Dinophyceae_X	Dinophyceae_XX	Gymnodinium	Gymnodinium_dorsalisulcum	0	0	0	0	0	0	0	1	0	0	0	0	0	0	0	0	0	0	0	0	0	0	0	0	0	0	0	3	1	0	2	0	0	0
OTU_617	Eukaryota	Amoebozoa	Lobosa	Tubulinea	Leptomyxida	Rhizamoeba-saxonica-lineage	Rhizamoeba	Rhizamoeba_saxonica	0	0	0	0	0	0	0	0	0	0	0	0	0	0	0	0	0	0	0	0	0	0	0	4	0	0	0	0	0	9	0	0	0	0
OTU_621	Eukaryota	Alveolata	Apicomplexa	Apicomplexa_X	Gregarines	Gregarines_X	Gregarines_XX	Gregarines_XX_sp.	0	0	0	0	0	0	0	0	0	0	0	0	0	0	15	0	0	0	0	0	0	0	0	0	0	0	0	0	0	0	0	0	0	0
OTU_622	Eukaryota	Alveolata	Dinophyta	Dinophyceae	Suessiales	Suessiales_X	Symbiodinium	Symbiodinium_sp.	0	1	1	3	1	1	0	0	0	0	2	4	0	0	0	0	0	0	0	0	0	0	0	0	1	0	0	0	0	0	2	3	0	0
OTU_623	Eukaryota	Alveolata	Dinophyta	Dinophyceae	Dinophyceae_X	Dinophyceae_XX	Dinophyceae_XXX	Dinophyceae_XXX_sp.	0	0	0	0	0	0	0	0	0	0	0	1	0	0	0	0	0	0	0	1	2	0	0	0	0	0	0	0	8	0	0	0	0	0
OTU_624	Eukaryota	Alveolata	Apicomplexa	Apicomplexa_X	Gregarines	Gregarines_X	Gregarinidae	Gregarinidae_sp.	0	0	0	0	0	0	0	0	0	0	0	0	0	0	2	0	0	0	0	0	0	0	0	0	0	0	0	0	0	0	0	5	0	0
OTU_625	Eukaryota	Stramenopiles	Ochrophyta	Bacillariophyta	Bacillariophyta_X	Raphid-pennate	Cocconeis	Multi-affiliation	0	0	0	0	0	0	0	0	0	0	0	0	0	0	0	0	0	0	0	0	0	0	12	4	0	0	0	0	0	0	0	0	0	0
OTU_626	Eukaryota	Alveolata	Dinophyta	Dinophyceae	Dinophyceae_X	Dinophyceae_XX	Dinophyceae_XXX	Dinophyceae_XXX_sp.	0	0	0	0	0	0	0	0	0	0	0	0	0	0	0	0	0	0	0	13	0	0	0	0	0	0	0	0	0	0	0	0	0	0
OTU_627	Eukaryota	Alveolata	Dinophyta	Dinophyceae	Dinophyceae_X	Dinophyceae_XX	Dinophyceae_XXX	Dinophyceae_XXX_sp.	0	0	0	0	0	0	0	0	0	0	0	0	0	0	0	0	12	0	0	0	0	0	0	0	0	0	0	0	0	0	0	0	0	0
OTU_629	Eukaryota	Archaeplastida	Chlorophyta	Ulvophyceae	Ulvophyceae_X	Ulvophyceae_XX	Ulvophyceae_XXX	Ulvophyceae_XXX_sp.	0	0	0	0	0	0	0	0	0	0	0	0	0	0	0	0	0	8	0	0	0	0	0	0	0	0	0	0	0	0	0	0	0	0
OTU_630	Eukaryota	Alveolata	Dinophyta	Dinophyceae	Dinophyceae_X	Dinophyceae_XX	Multi-affiliation	Multi-affiliation	0	0	0	0	0	0	0	0	0	0	0	0	0	0	0	0	0	0	0	0	14	0	0	0	0	0	0	0	0	0	0	0	0	0
OTU_631	Eukaryota	Alveolata	Dinophyta	Dinophyceae	Suessiales	Suessiales_X	Woloszynskia	Woloszynskia_sp._strain1	1	0	0	0	0	2	0	0	0	3	0	0	0	0	0	0	0	0	0	0	0	0	0	0	5	11	0	0	0	0	0	0	0	0
OTU_632	Eukaryota	Alveolata	Dinophyta	Dinophyceae	Multi-affiliation	Multi-affiliation	Multi-affiliation	Multi-affiliation	0	0	0	0	0	0	0	0	0	0	0	0	0	0	0	0	0	0	0	0	0	0	0	0	0	0	0	0	0	16	0	0	0	0
OTU_633	Eukaryota	Alveolata	Ciliophora	Oligohymenophorea	Scuticociliatia	Uronematidae	Uronema_ciliate	Multi-affiliation	0	0	0	0	0	0	0	0	0	0	0	0	0	0	8	0	0	0	0	0	0	5	0	0	0	0	0	0	0	0	0	0	0	0
OTU_639	Eukaryota	Archaeplastida	Chlorophyta	Ulvophyceae	Oltmansiellopsidales	Oltmansiellopsidales_X	Dangemannia	Dangemannia_microcystis	0	0	0	0	2	0	0	0	0	0	0	0	0	0	0	0	0	6	0	0	0	0	0	10	0	0	0	0	0	0	0	0	0	0
OTU_642	Eukaryota	Alveolata	Dinophyta	Dinophyceae	Dinophyceae_X	Ostreopsidaceae	Coolia	Coolia_monotis	0	0	0	0	0	0	0	0	12	0	0	0	0	0	0	0	0	0	0	0	0	0	0	0	0	0	0	0	0	0	0	0	0	0
OTU_643	Eukaryota	Multi-affiliation	Multi-affiliation	Multi-affiliation	Multi-affiliation	Multi-affiliation	Multi-affiliation	Multi-affiliation	0	0	0	0	0	0	0	0	0	0	0	0	0	0	0	0	0	0	0	0	16	0	0	0	0	0	0	0	0	0	0	0	0	0
OTU_644	Eukaryota	Stramenopiles	Ochrophyta	Bacillariophyta	Bacillariophyta_X	Raphid-pennate	Multi-affiliation	Multi-affiliation	0	0	0	0	0	0	0	0	0	14	0	0	0	0	0	0	0	0	0	0	0	0	0	0	0	0	0	0	0	0	0	0	0	0
OTU_646	Eukaryota	Stramenopiles	Stramenopiles_X	Labyrinthulea	Thraustochytriales	Thraustochytriaceae	Thraustochytriaceae_X	Thraustochytriaceae_X_sp.	0	0	0	0	0	0	1	0	0	0	0	0	0	0	1	0	0	3	9	0	0	0	0	0	0	1	0	0	0	0	0	0	0	0
OTU_648	Eukaryota	Stramenopiles	Ochrophyta	Chrysophyceae	Chrysophyceae_X	Chrysophyceae_Clade-F	Paraphysomonas	Multi-affiliation	0	0	0	0	0	0	3	0	0	5	0	0	0	0	0	0	2	0	0	0	0	7	0	0	0	0	0	0	1	0	0	0	0	0
OTU_651	Eukaryota	Alveolata	Dinophyta	Dinophyceae	Multi-affiliation	Multi-affiliation	Multi-affiliation	Multi-affiliation	0	0	0	0	0	0	0	0	0	0	0	0	0	0	9	0	0	0	0	0	0	0	2	0	0	0	0	0	0	0	0	0	0	0
OTU_652	Eukaryota	Alveolata	Dinophyta	Dinophyceae	Suessiales	Suessiales_X	Suessiales_XX	Suessiales_XX_sp.	0	0	0	0	0	0	0	1	0	0	0	0	1	0	0	0	0	0	0	1	0	0	0	0	0	0	0	0	1	4	1	0	0	1
OTU_655	Eukaryota	Rhizaria	Cercozoa	Endomyxa	Vampyrellida	Vampyrellida_X	Vampyrellida_clade_B	Vampyrellida_sp.	0	0	0	0	0	0	0	0	0	0	0	0	0	0	0	0	0	0	0	0	0	0	11	0	0	0	0	0	0	0	0	0	0	0
OTU_657	Eukaryota	Opisthokonta	Choanoflagellida	Choanoflagellatea	Craspedida	Monosigidae_Group_M	Salpingoeca_M	Salpingoeca_urceolata	0	0	0	0	0	0	0	0	0	0	0	0	0	0	0	0	0	0	0	0	0	0	2	0	0	0	0	0	0	0	0	0	0	0
OTU_658	Eukaryota	Alveolata	Dinophyta	Dinophyceae	Dinophyceae_X	Dinophyceae_XX	Pyrodinium	Multi-affiliation	0	0	0	0	0	0	0	0	0	0	0	0	0	0	0	0	0	0	0	0	0	4	0	0	0	0	0	0	10	0	0	0	0	0
OTU_659	Eukaryota	Alveolata	Dinophyta	Dinophyceae	Dinophyceae_X	Dinophyceae_XX	Multi-affiliation	Multi-affiliation	0	0	2	0	0	0	0	0	0	0	0	0	0	0	0	0	0	0	0	0	0	0	0	0	0	0	0	0	0	0	0	0	0	0
OTU_660	Eukaryota	Alveolata	Dinophyta	Dinophyceae	Dinophyceae_X	Dinophyceae_XX	Alexandrium	Multi-affiliation	0	0	0	0	3	0	0	0	0	0	0	0	0	0	0	0	0	5	0	0	0	0	1	4	0	0	0	0	0	0	0	0	0	0
OTU_663	Eukaryota	Rhizaria	Cercozoa	Endomyxa	Vampyrellida	op14-lineage	op14-lineage_X	op14-lineage_X_sp.	14	0	0	0	0	0	0	0	0	0	0	0	0	0	0	0	0	0	0	0	0	0	0	0	0	0	0	0	0	0	0	0	0	0
OTU_665	Eukaryota	Stramenopiles	Stramenopiles_X	Labyrinthulea	Labyrinthulales	Labyrinthulaceae	Labyrinthulaceae_X	Labyrinthulaceae_X_sp.	0	0	3	0	0	0	0	0	0	0	0	1	0	0	0	0	0	0	0	0	0	2	0	0	0	0	0	0	0	0	9	0	0	0
OTU_666	Eukaryota	Alveolata	Dinophyta	Dinophyceae	Suessiales	Suessiales_X	Multi-affiliation	Multi-affiliation	1	0	0	0	0	0	0	0	0	0	0	0	1	0	0	0	2	0	0	0	0	0	0	0	0	0	0	0	1	0	0	0	0	0
OTU_671	Eukaryota	Alveolata	Dinophyta	Dinophyceae	Dinophyceae_X	Dinophyceae_XX	Multi-affiliation	Multi-affiliation	0	7	0	0	0	0	0	0	0	0	0	0	0	0	0	0	0	0	0	0	0	0	0	0	0	0	0	0	0	0	0	0	0	0
OTU_672	Eukaryota	Stramenopiles	Ochrophyta	Bacillariophyta	Bacillariophyta_X	Polar-centric-Mediophyceae	Multi-affiliation	Multi-affiliation	0	0	0	0	0	0	0	0	0	0	2	0	0	0	0	0	0	0	0	0	0	0	0	0	0	9	0	0	0	0	0	0	0	0
OTU_678	Eukaryota	Alveolata	Apicomplexa	Apicomplexa_X	Gregarines	Gregarines_X	Gregarines_XX	Gregarines_XX_sp.	0	0	0	0	0	0	0	0	0	0	0	0	0	0	17	0	0	0	0	0	0	0	0	0	0	0	0	0	0	0	0	0	0	0
OTU_679	Eukaryota	Opisthokonta	Mesomycetozoa	Ichthyosporea	Ichthyosphonida	Abeoformidae_Group_MAIP_2	Abeoformidae_Group_MAIP_2_X	Abeoformidae_Group_MAIP_2_X_sp.	0	0	0	0	0	0	0	0	0	1	0	0	0	0	0	0	0	7	0	0	0	0	0	0	0	0	0	0	0	0	0	0	0	0
OTU_680	Eukaryota	Hacrobia	Telonemia	Telonemia_X	Telonemia_XX	Telonemia-Group-1	Telonema-Group-1	Telonema_subtile	0	0	0	0	0	0	0	0	0	0	0	0	0	0	2	0	0	0	0	0	0	0	0	0	0	0	0	0	0	0	0	0	0	0
OTU_683	Eukaryota	Alveolata	Ciliophora	Spirotrichea	Choreotrichia	Strobilidiidae	Strobilidiidae_X	Strobilidiidae_X_sp.	2	0	0	0	0	4	0	0	0	0	0	0	0	0	0	0	0	0	0	0	0	0	0	0	0	0	2	0	0	0	0	0	0	0
OTU_685	Eukaryota	Alveolata	Apicomplexa	Apicomplexa_X	Colpodellidae	Colpodellidae_X	Voromonas	Voromonas_sp.	0	0	0	0	0	0	0	0	0	0	0	0	0	0	0	15	0	0	0	0	0	0	0	0	0	0	0	0	0	0	0	0	0	0
OTU_687	Eukaryota	Alveolata	Dinophyta	Dinophyceae	Suessiales	Suessiales_X	Symbiodinium	Symbiodinium_sp.	1	1	0	2	0	0	0	0	0	0	0	0	1	0	0	0	1	0	0	0	0	0	1	9	0	2	0	0	0	3	0	0	0	0
OTU_688	Eukaryota	Alveolata	Dinophyta	Dinophyceae	Dinophyceae_X	Dinophyceae_XX	Dinophyceae_XXX	Dinophyceae_XXX_sp.	0	0	0	0	0	0	0	0	0	0	0	0	0	0	0	2	0	2	0	0	0	0	0	0	0	0	0	0	0	0	0	0	0	0
OTU_694	Eukaryota	Alveolata	Dinophyta	Dinophyceae	Suessiales	Suessiales_X	Suessiales_XX	Suessiales_XX_sp.	0	0	0	0	0	0	0	0	0	0	0	0	0	0	0	0	0	0	0	0	0	0	0	0	0	0	0	0	14	0	0	0	0	0
OTU_697	Eukaryota	Opisthokonta	Mesomycetozoa	Ichthyosporea	Ichthyosphonida	Abeoformidae_Group_MAIP_1	Abeoformidae_Group_MAIP_1_X	Abeoformidae_Group_MAIP_1_X_sp.	0	0	0	0	0	0	0	0	0	0	0	0	0	0	0	0	5	0	0	0	0	0	0	0	0	0	0	0	0	0	0	0	0	6
OTU_698	Eukaryota	Alveolata	Dinophyta	Syndiniales	Dino-Group-II	Dino-Group-II-Clade-10-and-11	Dino-Group-II-Clade-10-and-11_X	Dino-Group-II-Clade-10-and-11_X_sp.	9	0	0	0	0	0	0	0	0	0	0	0	0	0	0	0	0	0	1	0	0	0	0	0	3	0	0	0	0	0	0	0	0	0
OTU_699	Eukaryota	Stramenopiles	Stramenopiles_X	Bicoecea	Anoecales	Cafeteriaceae	Pseudobodo	Multi-affiliation	0	0	0	8	0	0	0	0	0	0	0	0	0	0	0	0	0	0	0	0	0	0	0	0	0	0	0	0	0	0	0	0	0	0
OTU_704	Eukaryota	Stramenopiles	Ochrophyta	Bacillariophyta	Bacillariophyta_X	Araphid-pennate	Multi-affiliation	Multi-affiliation	0	0	0	0	0	0	1	0	0	0	0	0	0	0	0	0	2	0	7	0	0	0	0	0	0	0	0	0	0	0	0	0	0	0
OTU_705	Eukaryota	Alveolata	Dinophyta	Dinophyceae	Dinophyceae_X	Dinophyceae_XX	Dinophyceae_XXX	Dinophyceae_XXX_sp.	0	0	1	14	0	0	0	0	0	0	0	0	0	0	0	0	0	0	0	0	0	0	0	0	0	0	0	0	0	0	0	0	0	0
OTU_709	Eukaryota	Alveolata	Perkinsea	Perkinsida	Perkinsida_X	Perkinsida_XX	Perkinsus	Perkinsus_chesapeaki	0	0	0	0	0	0	0	0	0	0	0	0	0	0	0	0	0	0	0	0	0	0	0	12	0	0	0	0	0	0	0	0	0	0
OTU_710	Eukaryota	Alveolata	Apicomplexa	Apicomplexa_X	Gregarines	Gregarines_X	Gregarinidae	Gregarinidae_sp.	0	0	0	0	0	0	0	0	0	0	0	0	0	0	0	0	0	0	0	0	0	0	0	0	0	0	0	0	0	0	11	0	0	0
OTU_712	Eukaryota	Opisthokonta	Mesomycetozoa	Ichthyosporea	Ichthyosphonida	Abeoformidae_Group_MAIP_1	Abeoformidae_Group_MAIP_1_X	Abeoformidae_Group_MAIP_1_X_sp.	0	0	0	0	0	0	0	0	0	0	0	0	0	0	0	0	0	0	0	0	1	0	0	0	0	0	0	0	0	7	0	0	0	0
OTU_714	Eukaryota	Alveolata	Dinophyta	Dinophyceae	Dinophyceae_X	Dinophyceae_XX	Multi-affiliation	Multi-affiliation	0	0	0	0	3	0	0	0	0	0	0	0	0	0	5	0	0	0	0	0	0	0	0	0	0	0	1	0	0	0	1	0	0	0
OTU_717	Eukaryota	Stramenopiles	Ochrophyta	Bacillariophyta	Bacillariophyta_X	Polar-centric-Mediophyceae	Multi-affiliation	Multi-affiliation	0	0	0	0	0	0	0	0	0	0	0	0	0	0	5	4	0	0	0	0	0	0	4	3	2	5	0	0	0	0	0	0	0	0
OTU_721	Eukaryota	Stramenopiles	Ochrophyta	Phaeophyceae	Phaeophyceae_X	Phaeophyceae_XX	Arthrocladia	Arthrocladia_villosa	0	0	0	0	0	0	0	0	0	0	0	0	0	0	0	0	0	0	0	0	0	0	0	10	0	0	0	0	0	0	0	0	0	0
OTU_723	Eukaryota	Archaeplastida	Chlorophyta	Trebouxiophyceae	Chlorellales	Chlorellales_X	Multi-affiliation	Multi-affiliation	0	0	0	0	1	2	0	0	0	0	0	0	0	0	5	1	0	0	0	0	0	0	5	3	0	0	0	0	0	0	0	0	0	0
OTU_724	Eukaryota	Alveolata	Dinophyta	Dinophyceae	Dinophyceae_X	Dinophyceae_XX	Dinophyceae_XXX	Dinophyceae_XXX_sp.	0	0	0	0	0	0	0	0	0	0	0	11	0	0	0	0	0	0	0	0	2	0	0	0	0	0	0	0	2	0	0	0	0	0
OTU_730	Eukaryota	Alveolata	Dinophyta	Dinophyceae	Dinophyceae_X	Dinophyceae_XX	Dinophyceae_XXX	Dinophyceae_XXX_sp.	0	0	0	0	10	0	0	0	0	0	0	0	0	0	0	0	0	0	0	0	0	0	0	0	0	0	0	0	0	0	0	0	0	0
OTU_732	Eukaryota	Alveolata	Dinophyta	Dinophyceae	Dinophyceae_X	Dinophyceae_XX	Dinophyceae_XXX	Dinophyceae_XXX_sp.	0	0	0	9	0	0	0	0	0	0	0	0	3	0	0	0	0	0	0	0	0	0	0	0	0	0	0	0	0	0	0	0	0	0
OTU_736	Eukaryota	Alveolata	Dinophyta	Dinophyceae	Dinophyceae_X	Dinophyceae_XX	Alexandrium	Multi-affiliation	0	0	0	0	0	0	10	0	0	0	0	0	0	0	0	0	0	0	0	0	0	0	0	0	0	0	0	0	0	0	0	0	0	0
OTU_738	Eukaryota	Alveolata	Dinophyta	Dinophyceae	Suessiales	Suessiales_X	Woloszynskia	Woloszynskia_sp._strain1	0	0	0	0	0	0	0	0	0	0	0	0	2	0	0	0	0	0	0	0	0	1	0	0	0	0	0	0	0	3	0	0	1	0
OTU_740	Eukaryota	Alveolata	Dinophyta	Syndiniales	Dino-Group-II	Dino-Group-II-Clade-3	Dino-Group-II-Clade-3_X	Dino-Group-II-Clade-3_X_sp.	0	0	0	0	0	0	0	0	0	0	0	0	0	0	0	0	0	0	0	0	0	0	10	0	0	0	0	0	0	0	0	0	0	0
OTU_743	Eukaryota	Stramenopiles	Stramenopiles_X	Labyrinthulea	Thraustochytriales	Thraustochytriaceae	Thraustochytriaceae_X	Thraustochytriaceae_X_sp.	3	0	0	0	0	0	0	0	0	0	0	0	0	0	0	0	0	0	0	1	0	1	0	0	0	6	0	0	0	0	0	0	0	0
OTU_744	Eukaryota	Multi-affiliation	Multi-affiliation	Multi-affiliation	Multi-affiliation	Multi-affiliation	Multi-affiliation	Multi-affiliation	0	0	0	0	0	0	0	0	0	0	0	0	0	0	0	0	0	0	0	0	0	0	0	0	0	0	0	0	0	0	0	0	0	9
OTU_746	Eukaryota	Alveolata	Dinophyta	Dinophyceae	Dinophyceae_X	Dinophyceae_XX	Dinophyceae_XXX	Dinophyceae_XXX_sp.	0	12	0	0	0	0	0	0	0	0	0	0	0	0	0	0	0	0	0	0	0	0	0	0	0	0	0	0	0	0	0	0	0	0
OTU_748	Eukaryota	Stramenopiles	Stramenopiles_X	MAST	MAST-3	MAST-3J	MAST-3J_X	MAST-3J_X_sp.	0	0	0	0	0	0	0	0	0	0	0	0	0	0	0	0	0	0	0	0	0	0	1	0	0	0	0	0	0	0	0	0	0	0
OTU_749	Eukaryota	Alveolata	Apicomplexa	Apicomplexa_X	Gregarines	Gregarines_X	Selenidium	Selenidium_sp.	4	0	0	0	0	0	0	0	0	0	0	0	0	0	0	0	0	0	0	0	0	0	0	5	0	0	0	0	0	0	0	0	0	0
OTU_751	Eukaryota	Opisthokonta	Mesomycetozoa	Ichthyosporea	Ichthyosphonida	Abeoformidae_Group_MAIP_1	Abeoformidae_Group_MAIP_1_X	Abeoformidae_Group_MAIP_1_X_sp.	0	0	0	0	0	1	0	0	0	0	0	0	0	0	0	0	0	0	0	0	0	0	0	0	0	0	0	0	0	8	0	0	0	0
OTU_753	Eukaryota	Alveolata	Dinophyta	Dinophyceae	Dinophyceae_X	Pfiesteriaceae	Multi-affiliation	Multi-affiliation	0	0	0	0	0	0	0	7	0	0	0	0	0	0	0	0	0	0	0	0	0	0	0	0	0	0	0	0	2	0	0	1	0	0
OTU_754	Eukaryota	Alveolata	Dinophyta	Dinophyceae	Dinophyceae_X	Dinophyceae_XX	Dinophyceae_XXX	Dinophyceae_XXX_sp.	0	0	0	0	0	0	0	0	0	0	0	0	0	0	0	0	0	0	0	0	0	0	0	0	0	0	0	0	12	0	0	0	0	0
OTU_756	Eukaryota	Alveolata	Dinophyta	Dinophyceae	Dinophyceae_X	Dinophyceae_XX	Dinophyceae_XXX	Dinophyceae_XXX_sp.	0	0	0	0	0	0	0	0	0	0	0	0	0	0	0	0	0	0	0	0	0	0	0	0	0	0	0	0	2	0	0	0	0	0
OTU_760	Eukaryota	Alveolata	Ciliophora	Oligohymenophorea	Sessilida	Vorticellidae	Pseudovorticella	Pseudovorticella_punctata	0	0	0	0	0	0	0	0	0	0	0	0	0	0	0	0	0	0	0	0	0	0	4	1	0	0	0	0	0	0	0	0	0	0
OTU_761	Eukaryota	Stramenopiles	Ochrophyta	Bacillariophyta	Bacillariophyta_X	Polar-centric-Mediophyceae	Multi-affiliation	Multi-affiliation	0	0	0	0	0	0	0	0	0	0	0	0	0	0	2	0	0	0	0	0	0	0	0	0	0	8	0	0	0	0	0	0	0	0
OTU_763	Eukaryota	Alveolata	Dinophyta	Dinophyceae	Dinophyceae_X	Dinophyceae_XX	Dinophyceae_XXX	Dinophyceae_XXX_sp.	0	0	0	0	0	0	0	1	0	0	0	0	0	0	0	0	0	0	0	0	0	0	0	0	0	0	0	0	0	1	0	0	0	0
OTU_764	Eukaryota	Alveolata	Dinophyta	Dinophyceae	Dinophyceae_X	Dinophyceae_XX	Multi-affiliation	Multi-affiliation	0	0	0	0	0	0	0	0	0	0	0	0	0	0	0	0	0	0	0	0	0	0	0	11	0	0	0	0	0	0	0	0	0	0
OTU_767	Eukaryota	Alveolata	Dinophyta	Dinophyceae	Dinophyceae_X	Dinophyceae_XX	Gymnodinium	Gymnodinium_dorsalisulcum	0	9	0	0	0	0	0	0	0	0	0	0	0	0	0	0	0	0	0	0	0	0	0	0	0	0	0	0	0	0	0	0	0	0
OTU_768	Eukaryota	Stramenopiles	Ochrophyta	Bacillariophyta	Bacillariophyta_X	Polar-centric-Mediophyceae	Multi-affiliation	Multi-affiliation	0	0	0	0	0	0	0	0	0	0	0	0	0	0	0	0	0	0	0	0	0	0	0	0	0	12	0	0	0	0	0	0	0	0
OTU_771	Eukaryota	Alveolata	Apicomplexa	Apicomplexa_X	Novel-Apicomplexa-Class-2	Novel-Apicomplexa-Class-2_X	Novel-Apicomplexa-Class-2_XX	Novel-Apicomplexa-Class-2_XX_sp.	0	0	0	0	12	0	0	0	0	0	0	0	0	0	0	0	0	0	0	0	0	0	0	0	0	0	0	0	0	0	0	0	0	0
OTU_773	Eukaryota	Archaeplastida	Chlorophyta	Trebouxiophyceae	Trebouxiophyceae_X	Trebouxiophyceae_XX	Botryococcus	Botryococcus_braunii	0	0	0	0	0	4	0	0	0	0	0	0	0	0	0	0	7	0	0	0	0	0	0	4	0	0	0	0	0	0	0	0	0	0
OTU_775	Eukaryota	Stramenopiles	Stramenopiles_X	MAST	MAST-12	MAST-12A	MAST-12A_X	MAST-12A_X_sp.	0	0	0	0	3	0	0	0	0	0	3	0	0	0	7	0	0	0	0	0	0	0	1	3	0	0	0	0	0	0	0	0	0	0
OTU_778	Eukaryota	Alveolata	Multi-affiliation	Multi-affiliation	Multi-affiliation	Multi-affiliation	Multi-affiliation	Multi-affiliation	0	0	0	0	0	0	0	15	0	0	0	0	0	0	0	0	0	0	0	0	0	0	0	0	0	0	0	0	0	0	0	0	0	0
OTU_779	Eukaryota	Alveolata	Dinophyta	Dinophyceae	Suessiales	Suessiales_X	Woloszynskia	Woloszynskia_sp._strain1	0	0	0	0	0	0	0	0	0	0	0	0	0	0	0	0	0	0	0	0	0	0	0	0	0	0	0	0	0	0	0	0	10	0
OTU_787	Eukaryota	Alveolata	Dinophyta	Dinophyceae	Dinophyceae_X	Dinophyceae_XX	Gymnodinium	Gymnodinium_dorsalisulcum	0	0	0	0	0	0	0	0	0	0	0	0	0	0	0	0	0	0	0	0	0	0	0	0	0	0	0	0	0	0	0	0	0	13
OTU_791	Eukaryota	Alveolata	Dinophyta	Syndiniales	Dino-Group-II	Dino-Group-II-Clade-1	Dino-Group-II-Clade-1_X	Dino-Group-II-Clade-1_X_sp.	0	1	2	0	0	0	0	0	0	0	0	0	0	0	0	0	0	0	0	0	0	0	0	0	0	1	0	0	1	0	1	0	0	0
OTU_793	Eukaryota	Stramenopiles	Ochrophyta	Eustigmatophyceae	Eustigmatophyceae_X	Eustigmatophyceae_XX	Nannochloropsis	Nannochloropsis_sp.	0	0	0	0	0	0	0	0	0	0	0	0	0	0	2	0	0	1	6	0	0	0	0	0	0	0	0	0	0	0	0	0	0	0
OTU_796	Eukaryota	Alveolata	Ciliophora	Oligohymenophorea	Peritrichia	Vaginicolidae	Vaginicolidae_X	Vaginicolidae_X_sp.	0	3	2	0	0	0	0	0	0	0	0	0	0	0	0	0	0	0	0	0	0	0	0	2	0	0	0	0	0	0	0	0	0	0
OTU_797	Eukaryota	Alveolata	Apicomplexa	Apicomplexa_X	Gregarines	Gregarines_X	Gregarinidae	Gregarinidae_sp.	0	0	8	0	0	0	0	0	0	0	0	0	0	0	0	0	0	0	0	0	0	0	0	0	0	0	0	0	0	0	0	0	0	0
OTU_798	Eukaryota	Alveolata	Dinophyta	Dinophyceae	Dinophyceae_X	Dinophyceae_XX	Multi-affiliation	Multi-affiliation	0	0	0	0	0	0	0	0	0	0	0	0	0	0	0	0	0	0	0	12	0	0	0	0	0	0	0	0	0	0	0	0	0	0
OTU_799	Eukaryota	Alveolata	Dinophyta	Dinophyceae	Suessiales	Suessiales_X	Woloszynskia	Woloszynskia_sp._strain1	0	0	0	0	0	0	0	0	0	0	0	0	0	0	0	0	0	0	0	0	0	0	0	0	0	0	0	0	0	9	0	0	0	0
OTU_800	Eukaryota	Stramenopiles	Ochrophyta	Bacillariophyta	Bacillariophyta_X	Raphid-pennate	Raphid-pennate_X	Raphid-pennate_X_sp.	0	0	0	0	0	0	0	0	0	8	0	0	0	0	0	0	0	0	0	0	0	0	0	0	0	0	0	0	0	0	0	0	0	0
OTU_801	Eukaryota	Alveolata	Dinophyta	Dinophyceae	Dinophyceae_X	Dinophyceae_XX	Gymnodinium	Gymnodinium_dorsalisulcum	0	0	0	0	0	0	0	0	0	0	0	0	0	0	0	0	0	0	0	0	0	0	0	0	0	0	0	0	0	8	0	0	0	0
OTU_805	Eukaryota	Stramenopiles	Stramenopiles_X	Oomycota	Oomycota_X	Olpidophydiales	Olpidiopsis	Olpidiopsis_porphyrae	0	0	0	0	0	0	0	0	0	0	0	0	0	0	1	0	0	0	0	0	0	0	5	0	0	0	0	0	0	0	0	0	0	0
OTU_807	Eukaryota	Alveolata	Dinophyta	Dinophyceae	Dinophyceae_X	Dinophyceae_XX	Alexandrium	Alexandrium_catenella-GroupIV-IIC	0	0	0	0	0	0	0	0	0	0	0	0	3	0	0	0	0	0	0	0	0	0	0	0	0	0	0	0	0	0	0	1	0	0
OTU_808	Eukaryota	Alveolata	Dinophyta	Dinophyceae	Dinophyceae_X	Dinophyceae_XX	Dinophyceae_XXX	Dinophyceae_XXX_sp.	0	0	0	0	0	0	0	0	0	0	0	0	0	0	0	0	0	0	0	0	0	0	0	0	0	0	0	0	9	0	0	0	0	0
OTU_809	Eukaryota	Opisthokonta	Choanoflagellida	Choanoflagellatea	Craspedida	Monosigidae_Group_M	Salpingoeca_M	Salpingoeca_urceolata	0	0	0	0	0	0	0	0	0	0	0	0	0	0	0	0	0	0	0	0	0	0	11	0	0	0	0	0	0	0	0	0	0	0
OTU_810	Eukaryota	Archaeplastida	Chlorophyta	Ulvophyceae	Ulotrichales	Ulotrichales_X	Multi-affiliation	Multi-affiliation	0	0	0	0	0	0	0	0	0	0	0	0	0	0	0	0	0	0	0	0	0	0	0	0	0	0	0	0	0	1	0	0	0	0
OTU_813	Eukaryota	Alveolata	Dinophyta	Dinophyceae	Suessiales	Suessiales_X	Symbiodinium	Multi-affiliation	0	0	0	0	0	0	0	0	0	0	1	0	0	0	18	0	0	0	0	0	0	0	0	0	2	0	0	0	0	0	0	0	0	0
OTU_818	Eukaryota	Stramenopiles	Stramenopiles_X	Oomycota	Oomycota_X	Oomycota_XX	Plasmopara	Plasmopara_viticola	0	0	0	0	0	0	0	0	0	0	0	0	0	0	0	0	0	0	1	0	0	0	0	0	0	0	0	0	0	0	0	10	0	0
OTU_820	Eukaryota	Alveolata	Dinophyta	Dinophyceae	Dinophyceae_X	Pfiesteriaceae	Cryptoperidiniopsis	Cryptoperidiniopsis_brodyi	0	0	0	0	0	0	0	0	0	0	0	0	0	0	0	0	0	0	0	0	0	0	0	0	0	0	0	0	0	11	0	0	0	0
OTU_821	Eukaryota	Alveolata	Dinophyta	Dinophyceae	Dinophyceae_X	Dinophyceae_XX	Gymnodinium	Gymnodinium_dorsalisulcum	0	0	0	8	0	0	0	0	0	0	0	0	0	0	0	0	0	0	0	0	1	0	0	0	0	0	0	0	0	0	0	0	0	0
OTU_826	Eukaryota	Rhizaria	Cercozoa	Filosa-Thecofilosea	Cryomonadida	Protaspa-lineage	Protaspa-lineage_X	Protaspa-lineage_X_sp.	0	0	0	0	0	0	0	0	0	0	0	0	0	0	5	0	0	0	0	0	0	0	0	0	0	0	0	0	0	0	0	0	0	0
OTU_828	Eukaryota	Opisthokonta	Mesomycetozoa	Ichthyosporea	Ichthyosphonida	Pseudoperkinsidae	Multi-affiliation	Multi-affiliation	0	0	0	0	0	8	0	0	0	0	0	0	0	0	0	0	0	0	0	0	0	0	0	0	0	0	0	0	0	0	0	0	0	0
OTU_829	Eukaryota	Alveolata	Dinophyta	Dinophyceae	Dinophyceae_X	Dinophyceae_XX	Pentapharsodinium	Pentapharsodinium_tyrrhenicum	0	0	0	0	0	0	0	0	0	0	0	0	0	0	0	9	0	0	0	0	0	0	0	0	0	0	0	0	0	0	0	0	0	0
OTU_845	Eukaryota	Alveolata	Dinophyta	Dinophyceae	Dinophyceae_X	Dinophyceae_XX	Posoniella	Posoniella_tricarinelloides	0	0	0	0	0	0	0	0	0	0	0	0	0	0	0	0	0	0	0	0	0	0	7	0	0	0	0	0	0	0	0	0	0	0
OTU_850	Eukaryota	Alveolata	Dinophyta	Dinophyceae	Suessiales	Suessiales_X	Pelagodinium	Pelagodinium_beii	0	0	0	0	0	0	0	0	0	0	0	0	0	0	0	0	0	0	0	0	0	0	0	0	0	0	0	0	0	0	0	0	7	0
OTU_851	Eukaryota	Alveolata	Ciliophora	Oligohymenophorea	Scuticociliatia	Uronematidae	Multi-affiliation	Multi-affiliation	0	0	0	0	0	0	0	0	0	0	0	0	0	0	0	0	7	0	0	0	0	2	0	0	0	0	0	0	0	0	0	0	0	0
OTU_855	Eukaryota	Rhizaria	Cercozoa	Multi-affiliation	Multi-affiliation	Multi-affiliation	Multi-affiliation	Multi-affiliation	0	0	0	1	0	0	0	0	0	0	0	0	0	0	0	0	0	0	0	0	0	0	0	0	0	0	0	0	0	0	0	0	0	0
OTU_860	Eukaryota	Alveolata	Dinophyta	Dinophyceae	Suessiales	Suessiales_X	Woloszynskia	Woloszynskia_sp._strain1	7	0	0	0	0	0	0	0	0	0	0	0	0	0	0	0	0	0	0	0	0	0	0	0	0	0	0	0	0	0	0	0	0	0
OTU_862	Eukaryota	Alveolata	Ciliophora	Spirotrichea	Oligotrichia	Strombidiidae	Strombidium	Strombidium_biarmatum	0	0	0	0	0	0	0	0	0	0	0	0	0	0	0	0	0	0	0	0	0	0	8	0	0	0	0	0	0	0	0	0	0	0
OTU_863	Eukaryota	Alveolata	Dinophyta	Dinophyceae	Suessiales	Suessiales_X	Woloszynskia	Woloszynskia_sp._strain1	0	0	0	0	0	8	0	0	0	0	0	0	0	0	0	0	0	0	0	0	0	0	0	0	0	0	0	0	0	0	0	0	0	0
OTU_874	Eukaryota	Stramenopiles	Ochrophyta	Phaeophyceae	Phaeophyceae_X	Phaeophyceae_XX	Pylaiella	Pylaiella_sp._strain2	0	0	0	0	2	0	0	0	0	0	0	0	0	0	0	0	0	0	0	0	0	0	12	3	0	0	0	0	0	0	0	0	0	0
OTU_879	Eukaryota	Opisthokonta	Opisthokonta_X	Opisthokonta_XX	Opisthokonta_XXX	Opisthokonta_XXXX	Opisthokonta_XXXXX	Opisthokonta_XXXXX_sp.	0	0	0	0	0	0	0	0	0	0	0	0	0	0	0	0	0	0	0	0	0	0	0	7	0	0	0	0	0	0	0	0	0	0
OTU_880	Eukaryota	Alveolata	Dinophyta	Dinophyceae	Dinophyceae_X	Dinophyceae_XX	Gymnodinium	Gymnodinium_dorsalisulcum	0	0	0	0	0	0	0	0	0	0	0	0	0	0	0	0	0	0	0	0	0	0	0	0	0	0	0	0	0	0	8	0	0	0
OTU_881	Eukaryota	Stramenopiles	Ochrophyta	Bacillariophyta	Bacillariophyta_X	Radial-centric-basal-Coscinodiscophyceae	Radial-centric-basal-Coscinodiscophyceae_X	Radial-centric-basal-Coscinodiscophyceae_X_sp.	0	0	0	0	0	0	0	0	0	0	0	0	0	0	0	0	0	0	0	0	0	0	7	0	0	0	0	0	0	0	0	0	0	0
OTU_884	Eukaryota	Alveolata	Dinophyta	Syndiniales	Dino-Group-IV	Dino-Group-IV-Hematodinium-Group	Hematodinium	Multi-affiliation	0	7	0	0	0	0	0	0	0	0	0	0	0	0	0	0	0	0	0	0	0	0	0	0	0	0	0	0	0	0	0	0	0	0
OTU_885	Eukaryota	Alveolata	Dinophyta	Dinophyceae	Dinophyceae_X	Dinophyceae_XX	Gymnodinium	Gymnodinium_dorsalisulcum	0	0	0	0	0	0	0	0	0	0	0	0	7	0	0	0	0	0	0	0	0	0	0	0	0	0	0	0	0	0	0	0	0	0
OTU_886	Eukaryota	Alveolata	Dinophyta	Dinophyceae	Dinophyceae_X	Dinophyceae_XX	Dinophyceae_XXX	Dinophyceae_XXX_sp.	0	0	0	0	0	0	0	0	0	0	0	0	0	0	0	0	0	0	0	0	0	0	0	0	0	0	0	7	0	0	0	0	0	0
OTU_887	Eukaryota	Stramenopiles	Ochrophyta	Bacillariophyta	Bacillariophyta_X	Polar-centric-Mediophyceae	Multi-affiliation	Multi-affiliation	0	0	0	0	0	0	0	0	0	0	0	0	0	0	3	0	0	0	0	0	0	0	0	4	2	0	0	0	0	0	0	0	0	0
OTU_888	Eukaryota	Stramenopiles	Stramenopiles_X	MAST	MAST-12	MAST-12A	MAST-12A_X	MAST-12A_X_sp.	0	0	0	0	0	2	0	0	0	0	0	0	0	0	0	0	5	1	0	0	0	0	0	0	1	0	0	0	0	0	0	0	0	0
OTU_890	Eukaryota	Stramenopiles	Stramenopiles_X	MAST	MAST-6	MAST-6_X	MAST-6_XX	MAST-6_XX_sp.	0	0	0	7	0	0	0	0	0	0	0	0	0	0	0	0	0	0	0	0	0	0	0	0	0	0	0	0	0	0	0	0	0	0
OTU_892	Eukaryota	Rhizaria	Cercozoa	Filosa-Thecofilosea	Cryomonadida	Protaspa-lineage	Multi-affiliation	Multi-affiliation	0	0	0	0	0	0	0	0	0	0	0	0	0	0	0	0	0	7	0	0	0	0	0	0	0	0	0	0	0	0	0	0	0	0
OTU_894	Eukaryota	Stramenopiles	Ochrophyta	Phaeophyceae	Phaeophyceae_X	Phaeophyceae_XX	Heribaudiella	Heribaudiella_fluviatilis	0	0	0	0	0	11	0	0	0	0	0	0	0	0	0	0	0	0	1	0	0	0	0	0	0	1	0	0	0	0	0	0	0	0
OTU_897	Eukaryota	Alveolata	Ciliophora	Oligohymenophorea	Peritrichia	Vaginicolidae	Vaginicolidae_X	Vaginicolidae_X_sp.	0	0	0	0	0	0	0	0	0	0	0	0	0	0	0	0	0	0	0	0	0	0	0	0	0	0	0	0	0	0	0	0	0	9
OTU_898	Eukaryota	Alveolata	Ciliophora	Spirotrichea	Choreotrichia	Tintinnidae	Tintinnopsis	Tintinnopsis_sp._strain1	0	0	0	0	0	0	0	0	0	0	0	0	0	0	0	0	0	3	0	0	0	0	0	0	0	2	0	0	0	0	0	0	0	0
OTU_901	Eukaryota	Alveolata	Dinophyta	Dinophyceae	Dinophyceae_X	Dinophyceae_XX	Dinophyceae_XXX	Dinophyceae_XXX_sp.	0	0	0	0	0	3	1	0	2	0	0	0	0	0	0	0	0	0	0	0	0	0	0	0	2	0	0	0	2	0	1	0	0	0
OTU_902	Eukaryota	Alveolata	Dinophyta	Dinophyceae	Suessiales	Suessiales_X	Woloszynskia	Woloszynskia_sp._strain1	0	0	0	0	0	0	0	0	0	2	0	0	0	0	0	0	0	0	0	0	0	0	0	0	2	0	0	0	0	0	0	0	0	0
OTU_903	Eukaryota	Stramenopiles	Ochrophyta	Bacillariophyta	Bacillariophyta_X	Radial-centric-basal-Coscinodiscophyceae	Rhizosolenia	Multi-affiliation	0	0	0	0	0	0	0	0	0	0	2	0	0	0	0	0	0	0	0	0	0	0	0	0	0	0	5	0	0	0	0	0	0	0
OTU_906	Eukaryota	Stramenopiles	Stramenopiles_X	Bigyromonadea	Bigyromonadea_X	Bigyromonadea_XX	Developayella	Developayella_sp.	0	0	0	0	0	0	0	0	0	0	0	0	0	0	0	0	0	0	0	0	0	0	0	0	0	0	0	0	2	0	0	0	0	0
OTU_907	Eukaryota	Rhizaria	Cercozoa	Filosa-Thecofilosea	Cryomonadida	Protaspa-lineage	Protaspa	Protaspa_longipes	0	0	0	0	0	0	0	0	0	0	0	0	0	0	7	6	0	0	0	0	0	0	0	0	0	0	0	0	0	0	0	0	0	0
OTU_908	Eukaryota	Rhizaria	Cercozoa	Filosa-Thecofilosea	Ebriida	Botuliformidae	Botuliformidae_X	Botuliformidae_X_sp.	0	0	0	0	2	0	0	0	0	0	0	0	0	0	0	0	0	0	0	0	0	0	0	0	0	0	0	0	0	5	0	0	0	0
OTU_909	Eukaryota	Alveolata	Ciliophora	Spirotrichea	Hypotrichia	Hypotrichia_X	Hypotrichia_XX	Hypotrichia_XX_sp.	0	0	0	0	0	0	0	0	0	0	0	0	0	0	0	0	0	0	0	0	0	0	9	0	0	0	0	0	0	0	0	0	0	0
OTU_910	Eukaryota	Stramenopiles	Stramenopiles_X	Oomycota	Oomycota_X	Peronosporales	Multi-affiliation	Multi-affiliation	0	0	0	0	0	0	0	0	0	0	0	0	0	0	0	0	0	0	0	0	7	0	0	0	0	0	0	0	0	0	0	0	0	0
OTU_912	Eukaryota	Stramenopiles	Stramenopiles_X	Labyrinthulea	Thraustochytriales	Thraustochytriaceae	Thraustochytriaceae_X	Thraustochytriaceae_X_sp.	0	0	0	0	0	0	0	0	0	1	0	0	0	0	0	0	13	0	0	0	0	0	0	0	0	0	0	0	0	0	0	0	0	0
OTU_913	Eukaryota	Stramenopiles	Stramenopiles_X	Oomycota	Oomycota_X	Haliphthorales	Haliphthoros	Haliphthoros_sp.	0	0	0	0	0	5	2	0	0	0	0	0	0	0	0	0	0	0	0	0	0	0	0	0	0	0	5	0	0	0	0	0	0	0
OTU_914	Eukaryota	Alveolata	Ciliophora	Oligohymenophorea	Mobilida	Trichodinidae	Trichodina	Trichodina_ruditapicis	0	0	0	0	0	0	0	0	0	0	0	0	7	0	0	0	0	0	0	0	0	0	0	0	0	0	0	0	0	0	0	0	0	0
OTU_917	Eukaryota	Alveolata	Dinophyta	Dinophyceae	Dinophyceae_X	Dinophyceae_XX	Dinophyceae_XXX	Dinophyceae_XXX_sp.	0	0	0	0	0	0	0	0	0	0	2	0	0	0	0	0	1	1	0	0	0	0	0	0	2	0	2	0	0	0	0	0	0	0
OTU_919	Eukaryota	Rhizaria	Cercozoa	Endomyxa	Vampyrellida	Vampyrellida_X	Vampyrellida_XX	Vampyrellida_XX_sp.	0	0	0	0	0	0	0	0	0	0	0	0	0	0	0	0	0	0	0	0	0	0	11	0	0	0	0	0	0	0	0	0	0	0
OTU_920	Eukaryota	Stramenopiles	Stramenopiles_X	Labyrinthulea	Thraustochytriales	Thraustochytriaceae	Thraustochytriaceae_X	Thraustochytriaceae_X_sp.	0	0	0	0	0	0	0	0	0	0	0	0	0	0	0	0	0	0	0	0	0	0	7	0	0	0	0	0	0	0	0	0	0	0
OTU_923	Eukaryota	Rhizaria	Cercozoa	Filosa-Imbricatea	Thaumatomonadida	Thaumatomonadidae	Reckertia	Reckertia_filosa	0	0	0	0	0	0	0	3	0	0	0	0	0	0	0	0	0	0	0	0	0	0	0	0	0	0	0	0	0	0	2	0	0	0
OTU_926	Eukaryota	Archaeplastida	Rhodophyta	Florideophyceae	Gigartinales	Gigartinales_X	Corynocystis	Corynocystis_prostrata	0	0	0	0	0	0	0	0	0	0	0	0	0	0	0	0	0	0	0	0	0	0	8	0	0	0	0	0	0	0	0	0	0	0
OTU_927	Eukaryota	Stramenopiles	Ochrophyta	Bacillariophyta	Bacillariophyta_X	Raphid-pennate	Amphiprora	Amphiprora_paludosa	0	0	0	0	0	0	0	0	0	0	0	0	0	0	0	0	0	0	0	0	0	0	1	4	0	0	0	0	0	0	0	0	0	0
OTU_930	Eukaryota	Alveolata	Dinophyta	Dinophyceae	Dinophyceae_X	Dinophyceae_XX	Gymnodinium	Gymnodinium_dorsalisulcum	0	0	0	0	0	0	0	0	0	0	0	0	0	0	0	0	0	0	0	0	0	0	0	0	0	0	0	0	0	0	0	7	0	0
OTU_931	Eukaryota	Stramenopiles	Ochrophyta	Bacillariophyta	Bacillariophyta_X	Raphid-pennate	Navicula	Navicula_sp._strain3	0	0	0	0	0	0	0	0	0	0	0	0	0	0	0	3	0	0	0	0	0	0	1	0	0	0	0	0	0	0	0	0	0	0
OTU_932	Eukaryota	Alveolata	Dinophyta	Syndiniales	Dino-Group-II	Dino-Group-II-Clade-2	Dino-Group-II-Clade-2_X	Dino-Group-II-Clade-2_X_sp.	0	0	0	0	0	0	0	0	0	6	0	0	0	0	0	0	0	1	0	0	0	0	0	0	0	0	0	0	0	0	0	0	0	0
OTU_934	Eukaryota	Stramenopiles	Ochrophyta	Bacillariophyta	Bacillariophyta_X	Raphid-pennate	Raphid-pennate_X	Raphid-pennate_X_sp.	0	0	0	0	0	0	0	0	0	0	0	0	0	0	0	0	0	0	0	0	0	0	0	6	0	0	0	0	0	0	0	0	0	0
OTU_936	Eukaryota	Rhizaria	Cercozoa	Filosa-Granofilosea	Filosa-Granofilosea_X	Multi-affiliation	Multi-affiliation	Multi-affiliation	0	0	0	0	0	0	0	0	0	0	0	0	0	0	0	0	0	0	0	0	0	0	0	0	0	0	0	7	0	0	0	0	0	0
OTU_937	Eukaryota	Alveolata	Dinophyta	Dinophyceae	Suessiales	Suessiales_X	Multi-affiliation	Multi-affiliation	0	6	0	0	0	0	0	0	0	0	0	0	0	0	0	0	0	0	0	0	0	0	0	0	0	0	0	0	0	0	0	0	0	0
OTU_938	Eukaryota	Alveolata	Ciliophora	Spirotrichea	Euplotia	Uronychiidae	Diophrys	Multi-affiliation	0	0	0	0	0	0	0	0	0	0	0	0	0	0	0	0	0	0	0	0	0	0	0	6	0	0	0	0	0	0	0	0	0	0
OTU_939	Eukaryota	Archaeplastida	Chlorophyta	Ulvophyceae	Ulvales-relatives	Ulvales-relatives_X	Dilabifilum	Dilabifilum_sp.	0	0	0	0	0	0	0	0	0	0	0	1	0	0	0	0	0	0	0	0	0	0	6	0	0	0	0	0	0	0	0	0	0	0
OTU_940	Eukaryota	Alveolata	Dinophyta	Dinophyceae	Dinophyceae_X	Dinophyceae_XX	Gymnodinium	Gymnodinium_dorsalisulcum	0	0	0	0	0	0	0	0	0	0	0	0	0	5	0	0	0	0	0	0	0	0	0	0	0	0	0	0	0	0	0	0	0	0
OTU_942	Eukaryota	Alveolata	Apicomplexa	Apicomplexa_X	Colpodellidae	Colpodellidae_X	Multi-affiliation	Multi-affiliation	0	0	0	3	0	0	0	0	0	0	0	0	0	0	0	0	0	0	0	0	0	0	0	0	0	0	0	0	0	0	0	0	0	0
OTU_944	Eukaryota	Alveolata	Dinophyta	Dinophyceae	Dinophyceae_X	Dinophyceae_XX	Dinophyceae_XXX	Dinophyceae_XXX_sp.	0	0	6	0	0	0	0	0	0	0	0	0	0	0	0	0	0	0	0	0	0	0	0	0	0	0	0	0	0	0	0	2	0	1
OTU_945	Eukaryota	Alveolata	Dinophyta	Dinophyceae	Dinophyceae_X	Multi-affiliation	Multi-affiliation	Multi-affiliation	0	0	0	0	0	0	0	0	0	0	0	0	0	0	0	0	0	0	0	0	0	0	0	0	0	0	0	0	0	0	9	0	0	0
OTU_946	Eukaryota	Multi-affiliation	Multi-affiliation	Multi-affiliation	Multi-affiliation	Multi-affiliation	Multi-affiliation	Multi-affiliation	0	0	0	0	0	0	0	0	0	0	0	0	0	0	0	0	0	0	0	0	0	0	0	0	0	6	0	0	0	0	0	0	0	0
OTU_947	Eukaryota	Alveolata	Dinophyta	Dinophyceae	Dinophyceae_X	Dinophyceae_XX	Dinophyceae_XXX	Dinophyceae_XXX_sp.	0	0	0	0	0	0	0	0	0	0	0	0	0	0	0	0	0	0	0	0	0	0	0	0	0	0	0	0	0	0	2	0	0	0
OTU_950	Eukaryota	Multi-affiliation	Multi-affiliation	Multi-affiliation	Multi-affiliation	Multi-affiliation	Multi-affiliation	Multi-affiliation	0	0	0	0	5	0	0	0	0	0	0	0	0	0	0	0	0	0	0	0	0	0	1	1	0	0	0	0	0	0	0	0	1	0
OTU_957	Eukaryota	Alveolata	Apicomplexa	Apicomplexa_X	Colpodellidae	Colpodellidae_X	Colpodella	Colpodella_sp.	0	0	0	0	0	0	7	0	0	0	0	0	0	0	0	0	0	0	0	0	0	0	0	0	0	0	0	0	0	0	0	0	0	0
OTU_958	Eukaryota	Alveolata	Dinophyta	Dinophyceae	Dinophyceae_X	Dinophyceae_XX	Dinophyceae_XXX	Dinophyceae_XXX_sp.	0	0	7	0	0	0	0	0	0	0	0	0	0	0	0	0	0	0	0	0	0	0	0	0	0	0	0	0	0	0	0	0	0	0
OTU_960	Eukaryota	Alveolata	Apicomplexa	Apicomplexa_X	Gregarines	Gregarines_X	Lankesteria	Lankesteria_chelyosomae	0	0	0	0	0	0	0	0	0	0	0	0	0	0	0	0	0	0	0	0	0	0	0	1	0	0	0	0	0	0	0	0	0	0
OTU_962	Eukaryota	Alveolata	Dinophyta	Dinophyceae	Dinophyceae_X	Ostreopsidaceae	Coolia	Coolia_monotis	0	0	0	0	0	0	0	0	0	0	0	0	0	0	0	0	0	0	0	0	0	0	0	0	0	0	0	0	0	6	0	0	0	0
OTU_963	Eukaryota	Alveolata	Dinophyta	Dinophyceae	Dinophyceae_X	Dinophyceae_XX	Gymnodinium	Gymnodinium_dorsalisulcum	0	0	0	0	0	0	0	0	0	0	0	0	0	0	0	0	0	0	0	0	6	0	0	0	0	0	0	0	8	0	0	0	0	0
OTU_964	Eukaryota	Stramenopiles	Ochrophyta	Bacillariophyta	Bacillariophyta_X	Raphid-pennate	Achnanthes	Achnanthes_sp.	0	0	0	0	3	0	0	0	0	0	0	0	0	0	0	0	0	0	0	0	0	0	0	5	0	0	0	0	0	0	0	0	0	0
OTU_967	Eukaryota	Alveolata	Dinophyta	Dinophyceae	Dinophyceae_X	Dinophyceae_XX	Multi-affiliation	Multi-affiliation	0	0	0	0	0	0	0	0	0	0	0	0	0	0	7	0	0	0	0	0	0	0	0	0	0	0	0	0	0	0	0	0	0	0
OTU_968	Eukaryota	Alveolata	Dinophyta	Dinophyceae	Dinophyceae_X	Dinophyceae_XX	Gymnodinium	Gymnodinium_dorsalisulcum	0	0	0	2	0	0	0	0	0	0	0	0	0	0	0	0	0	0	0	0	0	0	0	0	0	0	0	0	0	0	0	0	0	0
OTU_979	Eukaryota	Stramenopiles	Stramenopiles_X	MOCH	MOCH-3	MOCH-3_X	MOCH-3_XX	MOCH-3_XX_sp.	0	0	0	0	0	0	0	0	0	0	0	0	0	0	4	2	0	0	0	0	0	0	0	0	0	0	0	0	0	0	0	0	0	0
OTU_980	Eukaryota	Alveolata	Dinophyta	Syndiniales	Dino-Group-I	Dino-Group-I-Clade-4	Euduboscquella	Euduboscquella_crenulata	0	0	0	0	0	0	0	0	0	0	0	0	0	0	0	0	0	0	0	0	0	0	0	0	0	6	0	0	0	0	0	0	0	0
OTU_982	Eukaryota	Alveolata	Dinophyta	Dinophyceae	Suessiales	Suessiales_X	Multi-affiliation	Multi-affiliation	0	0	0	0	0	0	0	0	0	0	0	0	0	0	0	0	0	0	0	0	0	6	0	0	0	0	0	0	0	0	0	0	0	0
OTU_984	Eukaryota	Alveolata	Ciliophora	Spirotrichea	Euplotia	Aspidiscidae	Aspidisca	Aspidisca_sp.	0	0	0	0	0	0	0	0	0	0	0	0	0	0	0	0	0	0	0	0	0	0	0	6	0	0	0	0	0	0	0	0	0	0
OTU_986	Eukaryota	Opisthokonta	Mesomycetozoa	Ichthyosporea	Ichthyosphonida	Pseudoperkinsidae	Pseudoperkinsus	Pseudoperkinsus_tapetis	0	0	0	0	0	0	0	0	0	0	0	0	0	0	0	0	0	0	0	0	0	0	0	0	0	0	0	0	0	0	5	0	1	0
OTU_989	Eukaryota	Alveolata	Dinophyta	Dinophyceae	Suessiales	Suessiales_X	Woloszynskia	Woloszynskia_sp._strain1	0	0	0	0	0	0	0	0	0	0	0	0	0	0	0	0	0	0	0	0	0	0	0	0	3	0	0	0	0	0	0	0	0	0
OTU_991	Eukaryota	Alveolata	Dinophyta	Dinophyceae	Dinophyceae_X	Dinophyceae_XX	Gymnodinium	Gymnodinium_dorsalisulcum	0	0	0	0	0	0	0	0	0	0	0	0	0	0	0	0	0	0	0	0	0	0	0	0	0	0	0	0	0	7	0	0	0	0
OTU_992	Eukaryota	Stramenopiles	Ochrophyta	Bacillariophyta	Bacillariophyta_X	Radial-centric-basal-Coscinodiscophyceae	Paralia	Paralia_sulcata	0	0	0	0	0	0	0	0	0	0	0	0	0	0	3	0	2	0	0	0	0	0	0	0	0	0	0	0	0	0	0	0	0	0
OTU_993	Eukaryota	Alveolata	Apicomplexa	Apicomplexa_X	Coccidia	Eimeriidae	Goussia	Multi-affiliation	0	0	0	0	0	0	0	0	0	0	0	0	0	0	4	2	0	0	0	0	0	0	0	0	0	0	0	0	0	0	0	0	0	0
OTU_997	Eukaryota	Stramenopiles	Ochrophyta	Phaeophyceae	Phaeophyceae_X	Phaeophyceae_XX	Fucus	Multi-affiliation	0	0	0	0	0	0	0	0	0	0	0	0	0	0	0	0	0	0	0	0	0	0	3	0	0	0	0	0	0	0	0	0	0	0
OTU_1004	Eukaryota	Archaeplastida	Chlorophyta	Ulvophyceae	Ulvales-relatives	Ulvales-relatives_X	Ulvales-relatives_XX	Ulvales-relatives_XX_sp.	0	0	0	0	0	0	0	0	0	0	0	0	0	0	0	0	0	0	0	0	0	0	0	0	0	0	7	0	0	0	0	0	0	0
OTU_1007	Eukaryota	Opisthokonta	Fungi	Basidiomycota	Agaricomycotina	Dacrymycetes	Guepiniopsis	Guepiniopsis_buccina	0	0	0	0	6	0	0	0	0	0	0	0	0	0	0	0	0	0	0	0	0	0	0	0	0	0	0	0	0	0	0	0	0	0
OTU_1011	Eukaryota	Alveolata	Ciliophora	Oligohymenophorea	Sessilida	Vorticellidae	Vorticellidae_X	Vorticellidae_X_sp.	0	0	0	0	0	0	0	0	0	0	0	0	0	0	0	0	0	0	0	0	0	0	5	0	0	0	0	0	0	0	0	0	0	0
OTU_1013	Eukaryota	Alveolata	Apicomplexa	Apicomplexa_X	Gregarines	Gregarines_X	Gregarines_XX	Gregarines_XX_sp.	0	0	0	0	0	0	0	0	0	0	0	0	0	0	0	5	0	0	0	0	0	0	0	0	0	0	0	0	0	0	0	0	0	0
OTU_1016	Eukaryota	Alveolata	Dinophyta	Syndiniales	Dino-Group-II	Dino-Group-II_X	Dino-Group-II_XX	Dino-Group-II_XX_sp.	0	0	0	0	0	0	0	0	0	0	0	0	0	0	0	0	0	0	0	0	0	0	0	0	0	0	0	0	0	6	0	0	0	0
OTU_1018	Eukaryota	Alveolata	Dinophyta	Dinophyceae	Dinophyceae_X	Dinophyceae_XX	Gonyaulax	Gonyaulax_sp.	5	0	0	0	0	0	0	0	0	0	0	0	0	0	2	0	0	0	0	0	0	0	0	0	0	0	0	0	0	0	0	0	0	0
OTU_1027	Eukaryota	Alveolata	Apicomplexa	Apicomplexa_X	Gregarines	Gregarines_X	Gregarines_XX	Gregarines_XX_sp.	0	0	0	0	0	0	0	0	0	0	0	0	0	0	0	0	0	0	0	0	0	0	0	0	0	0	6	0	0	0	0	0	0	0
OTU_1028	Eukaryota	Stramenopiles	Stramenopiles_X	Labyrinthulea	Thraustochytriales	Thraustochytriaceae	Thraustochytrium	Thraustochytrium_kinnei	0	0	0	0	0	0	0	0	0	0	0	0	0	0	0	0	0	0	0	0	0	0	0	5	0	0	0	0	0	0	0	0	0	0
OTU_1030	Eukaryota	Archaeplastida	Chlorophyta	Multi-affiliation	Multi-affiliation	Multi-affiliation	Multi-affiliation	Multi-affiliation	0	0	0	0	0	0	0	0	0	0	0	0	0	0	0	0	0	0	0	0	0	0	3	0	0	0	0	0	0	0	0	0	0	0
OTU_1031	Eukaryota	Alveolata	Dinophyta	Dinophyceae	Dinophyceae_X	Dinophyceae_XX	Dinophyceae_XXX	Dinophyceae_XXX_sp.	0	0	0	0	0	0	0	0	0	0	0	0	0	0	0	0	0	0	0	0	0	6	0	0	0	0	0	0	0	0	0	0	0	0
OTU_1035	Eukaryota	Alveolata	Dinophyta	Syndiniales	Dino-Group-II	Dino-Group-II-Clade-57	Dino-Group-II-Clade-57_X	Dino-Group-II-Clade-57_X_sp._strain1	0	0	6	0	0	0	0	0	0	0	0	0	0	0	0	0	0	0	0	0	0	0	0	0	0	0	0	0	0	0	0	0	0	0
OTU_1037	Eukaryota	Alveolata	Dinophyta	Dinophyceae	Dinophyceae_X	Dinophyceae_XX	Gymnodinium	Gymnodinium_dorsalisulcum	0	0	0	0	0	0	0	0	0	0	0	0	0	0	0	0	0	0	0	0	0	3	0	0	0	0	0	0	0	0	0	0	0	0
OTU_1038	Eukaryota	Alveolata	Dinophyta	Dinophyceae	Dinophyceae_X	Dinophyceae_XX	Dinophyceae_XXX	Dinophyceae_XXX_sp.	0	0	0	0	0	0	0	0	0	0	0	0	0	0	0	0	0	0	0	0	0	0	0	0	0	0	0	0	0	0	6	0	0	0
OTU_1039	Eukaryota	Alveolata	Dinophyta	Dinophyceae	Dinophyceae_X	Pfiesteriaceae	Pfiesteriaceae_X	Pfiesteriaceae_X_sp.	0	0	0	0	0	0	0	0	0	0	0	0	0	0	0	0	0	0	0	0	1	0	0	0	0	0	0	0	0	0	0	4	0	0
OTU_1041	Eukaryota	Alveolata	Dinophyta	Dinophyceae	Dinophyceae_X	Dinophyceae_XX	Dinophyceae_XXX	Dinophyceae_XXX_sp.	1	0	0	0	0	0	0	0	0	0	0	0	0	0	0	0	0	0	0	0	0	0	0	0	0	0	0	0	0	0	0	0	0	0
OTU_1043	Eukaryota	Alveolata	Dinophyta	Dinophyceae	Suessiales	Suessiales_X	Woloszynskia	Woloszynskia_sp._strain1	0	0	0	0	0	2	0	0	0	0	0	0	0	0	0	0	0	0	0	0	0	0	0	0	0	0	0	0	0	0	0	0	0	0
OTU_1044	Eukaryota	Alveolata	Dinophyta	Dinophyceae	Dinophyceae_X	Dinophyceae_XX	Dinophyceae_XXX	Dinophyceae_XXX_sp.	0	0	0	0	0	0	0	0	0	0	0	0	1	0	0	0	0	0	0	2	0	0	0	0	0	0	0	1	0	0	0	0	0	0
OTU_1046	Eukaryota	Alveolata	Dinophyta	Dinophyceae	Dinophyceae_X	Dinophyceae_XX	Dinophyceae_XXX	Dinophyceae_XXX_sp.	0	0	0	0	0	0	0	0	0	0	0	0	0	0	1	0	0	0	0	0	0	0	1	4	0	0	0	0	0	0	0	0	0	0
OTU_1048	Eukaryota	Alveolata	Dinophyta	Syndiniales	Dino-Group-II	Dino-Group-II-Clade-32	Dino-Group-II-Clade-32_X	Dino-Group-II-Clade-32_X_sp._strain1	0	0	0	0	0	0	0	0	0	0	0	0	1	0	0	0	0	0	0	0	0	0	0	0	0	0	0	0	2	0	0	0	0	0
OTU_1051	Eukaryota	Stramenopiles	Ochrophyta	Bacillariophyta	Bacillariophyta_X	Raphid-pennate	Raphid-pennate_X	Raphid-pennate_X_sp.	0	0	0	0	0	7	0	0	0	0	0	0	0	0	0	0	0	0	0	0	0	0	0	0	0	0	0	0	0	0	0	0	0	0
OTU_1052	Eukaryota	Stramenopiles	Stramenopiles_X	Labyrinthulea	Labyrinthulales	Labyrinthulaceae	Labyrinthulaceae_X	Labyrinthulaceae_X_sp.	0	0	0	0	0	0	0	0	0	0	0	0	0	0	0	0	0	0	0	0	0	0	0	6	0	0	0	0	0	0	0	0	0	0
OTU_1055	Eukaryota	Rhizaria	Cercozoa	Filosa-Imbricatea	Filosa-Imbricatea_X	Filosa-Imbricatea_XX	Filosa-Imbricatea_XXX	Multi-affiliation	0	0	0	0	0	0	0	0	0	0	0	0	0	0	0	0	0	0	5	0	0	0	0	0	0	0	0	0	0	0	0	0	0	0
OTU_1059	Eukaryota	Stramenopiles	Stramenopiles_X	Bicoecea	Anoecales	Caecitellaceae	Caecitellus	Caecitellus_parvulus	0	0	0	6	0	0	0	0	0	0	0	0	0	0	0	0	0	0	0	0	0	0	0	0	0	0	0	0	0	0	0	0	0	0
OTU_1061	Eukaryota	Alveolata	Apicomplexa	Apicomplexa_X	Gregarines	Gregarines_X	Gregarines_XX	Gregarines_XX_sp.	0	0	0	0	0	0	0	0	0	0	0	0	0	0	0	0	5	0	0	0	0	0	0	0	0	0	0	0	0	0	0	0	0	0
OTU_1063	Eukaryota	Alveolata	Ciliophora	Oligohymenophorea	Sessilida	Vorticellidae	Vorticellidae_X	Vorticellidae_X_sp.	0	0	0	0	0	0	0	4	0	0	0	0	0	0	0	0	0	0	0	0	0	0	0	0	0	0	0	0	1	0	0	0	0	0
OTU_1064	Eukaryota	Hacrobia	Cryptophyta	Cryptophyceae	Cryptophyceae_X	Cryptomonadales	Cryptomonadales_X	Multi-affiliation	5	0	0	0	0	0	0	0	0	0	0	0	0	0	0	0	0	0	0	0	0	0	0	0	0	0	0	0	0	0	0	0	0	0
OTU_1065	Eukaryota	Alveolata	Ciliophora	Spirotrichea	Oligotrichia	Strombidiidae	Strombidiidae_X	Strombidiidae_X_sp._strain1	0	0	0	0	0	0	0	0	0	0	0	0	0	0	0	0	0	0	0	0	0	0	5	0	0	0	0	0	0	0	0	0	0	0
OTU_1067	Eukaryota	Alveolata	Dinophyta	Dinophyceae	Dinophyceae_X	Ostreopsidaceae	Coolia	Coolia_monotis	0	0	0	0	0	0	0	0	0	0	0	0	0	0	0	0	0	0	0	0	2	1	0	0	0	0	0	0	2	0	1	0	0	0
OTU_1068	Eukaryota	Apusozoa	Hilomonadea	Planomonadida	Planomonadidae	Planomonadidae_Group-1	Ancyromonas	Ancyromonas_micra	0	0	0	0	0	0	0	0	0	0	0	0	0	0	0	0	0	0	0	0	0	0	0	0	0	0	0	0	0	0	6	0	0	0
OTU_1069	Eukaryota	Opisthokonta	Fungi	Chytridiomycota	Chytridiomycotina	Chytridiomycetes	Multi-affiliation	Multi-affiliation	0	0	0	0	0	0	0	0	0	6	0	0	0	0	0	0	0	0	0	0	0	0	0	0	0	0	0	0	0	0	0	0	0	0
OTU_1071	Eukaryota	Alveolata	Dinophyta	Syndiniales	Dino-Group-II	Dino-Group-II-Clade-56	Dino-Group-II-Clade-56_X	Dino-Group-II-Clade-56_X_sp._strain1	2	0	0	0	0	0	0	0	0	0	0	0	0	0	0	0	0	1	0	0	0	2	0	0	0	0	0	0	0	0	0	0	0	0
OTU_1077	Eukaryota	Alveolata	Dinophyta	Dinophyceae	Dinophyceae_X	Dinophyceae_XX	Dinophyceae_XXX	Dinophyceae_XXX_sp.	0	0	0	0	0	0	0	0	0	0	0	0	0	0	0	0	0	0	0	0	1	0	0	0	0	0	0	2	0	3	0	0	0	0
OTU_1079	Eukaryota	Alveolata	Dinophyta	Dinophyceae	Dinophyceae_X	Dinophyceae_XX	Gymnodinium	Gymnodinium_sp.	0	0	0	0	0	0	0	0	0	0	0	0	0	2	0	0	0	0	0	0	0	0	0	0	0	0	0	0	0	0	0	0	0	0
OTU_1081	Eukaryota	Alveolata	Dinophyta	Dinophyceae	Suessiales	Suessiales_X	Woloszynskia	Woloszynskia_sp._strain1	2	0	0	0	0	0	0	0	0	0	0	1	3	6	0	0	0	0	0	0	0	0	0	0	0	0	0	0	0	0	0	0	0	0
OTU_1088	Eukaryota	Alveolata	Dinophyta	Dinophyceae	Dinophyceae_X	Dinophyceae_XX	Multi-affiliation	Multi-affiliation	0	0	0	0	0	0	5	0	0	0	0	0	0	0	0	0	0	0	0	0	0	0	0	0	0	0	0	0	0	0	0	0	0	0
OTU_1089	Eukaryota	Stramenopiles	Ochrophyta	Chrysophyceae	Chrysophyceae_X	Chrysophyceae_Clade-F	Paraphysomonas	Paraphysomonas_sp.	0	0	0	0	0	0	0	0	0	0	0	0	0	0	0	0	0	0	0	0	0	0	0	0	0	0	0	0	0	6	0	0	0	0
OTU_1091	Eukaryota	Stramenopiles	Ochrophyta	Bacillariophyta	Bacillariophyta_X	Polar-centric-Mediophyceae	Multi-affiliation	Multi-affiliation	0	0	0	0	0	0	0	0	0	0	0	0	0	0	0	0	0	0	0	0	0	0	0	0	0	5	0	0	0	0	0	0	0	0
OTU_1092	Eukaryota	Stramenopiles	Stramenopiles_X	Labyrinthulea	Labyrinthulales	Labyrinthulaceae	Labyrinthulaceae_X	Labyrinthulaceae_X_sp.	0	0	1	0	0	0	0	0	0	0	0	0	0	0	0	0	0	0	0	0	0	0	0	0	0	0	0	0	0	0	0	0	0	0
OTU_1098	Eukaryota	Rhizaria	Cercozoa	Filosa-Imbricatea	Thaumatomonadida	Thaumatomonadida_X	Thaumatomonadida_XX	Thaumatomonadida_XX_sp.	6	0	0	0	0	0	0	0	0	0	0	0	0	0	0	0	0	0	0	0	0	0	0	0	0	0	0	0	0	0	0	0	0	0
OTU_1099	Eukaryota	Rhizaria	Cercozoa	Filosa-Imbricatea	Thaumatomonadida	Peregriniidae	Peregrinia	Peregrinia_sp.	0	0	0	0	0	5	0	0	0	0	0	0	0	0	0	0	0	0	0	0	0	0	0	0	0	0	0	0	0	0	0	0	0	0
OTU_1100	Eukaryota	Rhizaria	Cercozoa	Filosa-Imbricatea	Filosa-Imbricatea_X	Novel-clade-3	Novel-clade-3_X	Novel-clade-3_X_sp.	0	0	0	0	0	0	0	5	0	0	0	0	0	0	0	0	0	0	0	0	0	0	0	0	0	0	0	0	0	0	0	0	0	0
OTU_1102	Eukaryota	Rhizaria	Cercozoa	Filosa-Imbricatea	Filosa-Imbricatea_X	Novel-clade-3	Novel-clade-3_X	Novel-clade-3_X_sp.	0	0	0	0	0	5	0	0	0	0	0	0	0	0	0	0	0	0	0	0	0	0	0	0	0	0	0	0	0	0	0	0	0	0
OTU_1104	Eukaryota	Alveolata	Dinophyta	Dinophyceae	Suessiales	Suessiales_X	Multi-affiliation	Multi-affiliation	0	0	0	5	0	0	0	0	0	0	0	0	0	0	0	0	0	0	0	0	0	0	0	0	0	0	0	0	0	0	0	0	0	0
OTU_1108	Eukaryota	Stramenopiles	Ochrophyta	Bacillariophyta	Bacillariophyta_X	Raphid-pennate	Multi-affiliation	Multi-affiliation	0	0	0	0	0	0	0	0	0	0	0	0	0	0	0	0	0	0	0	0	0	0	1	0	0	0	0	0	0	0	0	0	0	0
OTU_1110	Eukaryota	Alveolata	Dinophyta	Dinophyceae	Dinophyceae_X	Ostreopsidaceae	Coolia	Coolia_monotis	0	0	0	0	0	0	0	0	0	0	0	0	0	0	0	0	0	0	0	0	0	0	0	0	0	0	0	0	0	0	0	0	0	9
OTU_1114	Eukaryota	Alveolata	Dinophyta	Dinophyceae	Dinophyceae_X	Dinophyceae_XX	Multi-affiliation	Multi-affiliation	0	0	0	0	0	0	0	0	0	0	0	0	0	0	0	0	0	0	0	0	0	0	0	0	0	0	4	0	0	0	0	0	0	0
OTU_1115	Eukaryota	Stramenopiles	Ochrophyta	Bacillariophyta	Bacillariophyta_X	Raphid-pennate	Psammodictyon	Multi-affiliation	0	0	0	0	2	0	0	0	0	0	0	0	0	0	3	0	0	0	0	0	0	0	0	0	2	0	0	0	0	0	0	0	0	0
OTU_1116	Eukaryota	Multi-affiliation	Multi-affiliation	Multi-affiliation	Multi-affiliation	Multi-affiliation	Multi-affiliation	Multi-affiliation	0	0	0	0	0	0	0	0	0	0	0	0	0	0	0	0	0	0	0	0	2	0	0	0	0	0	0	0	1	3	0	0	0	0
OTU_1117	Eukaryota	Multi-affiliation	Multi-affiliation	Multi-affiliation	Multi-affiliation	Multi-affiliation	Multi-affiliation	Multi-affiliation	0	0	0	0	0	0	0	0	0	0	0	0	1	0	0	0	0	0	0	0	0	0	0	0	0	0	0	0	0	0	0	0	0	0
OTU_1119	Eukaryota	Archaeplastida	Chlorophyta	Pyramimonadales	Pyramimonadales_X	Pyramimonadales_XX	Pterosperma	Multi-affiliation	0	0	0	0	0	0	0	0	0	0	0	0	0	0	0	0	0	0	0	0	0	3	0	0	0	0	0	0	0	0	0	0	0	0
OTU_1120	Eukaryota	Alveolata	Dinophyta	Dinophyceae	Suessiales	Suessiales_X	Woloszynskia	Woloszynskia_sp._strain1	0	0	0	0	0	0	0	1	0	0	0	0	0	0	0	0	0	0	0	0	0	0	0	0	0	0	0	0	0	3	0	0	0	0
OTU_1125	Eukaryota	Stramenopiles	Stramenopiles_X	Oomycota	Oomycota_X	Oomycota_XX	Oomycota_XXX	Oomycota_XXX_sp.	0	0	0	0	0	0	0	0	6	0	0	0	0	0	0	0	0	0	0	0	0	0	0	0	0	0	0	0	0	0	0	0	0	0
OTU_1132	Eukaryota	Alveolata	Ciliophora	Oligohymenophorea	Peritrichia	Vaginicolidae	Vaginicolidae_X	Vaginicolidae_X_sp.	0	0	0	0	0	0	0	0	0	0	0	0	1	0	0	0	0	0	0	0	0	0	2	0	0	0	0	0	0	0	0	0	0	0
OTU_1134	Eukaryota	Opisthokonta	Mesomycetozoa	Ichthyosporea	Ichthyosphonida	Abeoformidae_Group_MAIP_1	Abeoformidae_Group_MAIP_1_X	Abeoformidae_Group_MAIP_1_X_sp.	0	0	0	0	0	3	0	0	0	0	0	0	0	0	0	0	0	0	0	0	0	0	0	0	2	0	0	0	0	0	0	0	0	0
OTU_1137	Eukaryota	Stramenopiles	Stramenopiles_X	Bicoecea	Bicoecales	Bicoecaceae	Bicoecaceae_X	Bicoecaceae_X_sp.	0	0	0	0	0	0	0	0	0	0	0	0	0	0	0	0	0	0	0	0	0	0	0	0	0	0	0	0	5	0	0	0	0	0
OTU_1140	Eukaryota	Alveolata	Dinophyta	Dinophyceae	Dinophyceae_X	Dinophyceae_XX	Dinophyceae_XXX	Dinophyceae_XXX_sp.	0	0	0	0	0	4	0	0	0	0	0	0	0	0	0	0	0	0	0	0	0	0	0	0	0	0	0	0	0	0	0	0	0	0
OTU_1141	Eukaryota	Opisthokonta	Fungi	Ascomycota	Pezizomycotina	Pezizomycotina_X	Pezizomycotina_XX	Pezizomycotina_XX_sp.	0	0	0	0	0	0	0	0	0	0	0	0	0	0	4	0	0	0	0	0	0	0	0	0	0	0	0	0	0	0	0	0	0	0
OTU_1143	Eukaryota	Stramenopiles	Stramenopiles_X	Labyrinthulea	Thraustochytriales	Thraustochytriaceae	Thraustochytriaceae_X	Thraustochytriaceae_X_sp.	0	0	0	0	2	0	0	0	0	0	0	0	0	0	0	0	0	0	0	0	0	0	0	4	0	0	0	0	0	0	0	0	0	0
OTU_1144	Eukaryota	Apusozoa	Apusomonadidae	Apusomonadidae_Group-2	Apusomonadidae_Group-2B	Apusomonadidae_Group-2B_X	Apusomonadidae_Group-2B_XX	Apusomonadidae_Group-2B_XX_sp.	0	4	0	0	0	0	0	0	0	0	0	0	0	0	0	0	0	0	0	0	0	0	0	0	0	0	0	0	0	0	0	0	0	0
OTU_1145	Eukaryota	Stramenopiles	Stramenopiles_X	Labyrinthulea	Labyrinthulales	Labyrinthulaceae	Labyrinthula	Labyrinthula_sp.	0	0	0	0	0	0	0	0	0	0	0	0	0	0	0	0	0	0	0	0	0	0	0	0	0	0	0	0	0	0	0	2	0	0
OTU_1149	Eukaryota	Archaeplastida	Chlorophyta	Chlorophyceae	Chlamydomonadales	Chlamydomonadales_X	Chlamydomonas	Chlamydomonas_raudensis	0	0	0	0	0	0	0	0	0	0	0	0	0	0	0	0	0	0	0	0	0	0	0	0	0	0	0	0	2	0	0	1	0	0
OTU_1151	Eukaryota	Archaeplastida	Chlorophyta	Chlorophyceae	Sphaeropleales	Selenastraceae	Monoraphidium	Monoraphidium_dybowskii	0	0	0	0	0	0	0	0	0	0	0	0	0	0	0	0	0	0	0	0	0	0	0	5	0	0	0	0	0	0	0	0	0	0
OTU_1154	Eukaryota	Alveolata	Dinophyta	Dinophyceae	Dinophyceae_X	Dinophyceae_XX	Multi-affiliation	Multi-affiliation	0	0	0	0	0	0	0	0	0	0	0	0	0	0	0	4	0	0	0	0	0	0	0	0	0	0	0	0	0	0	0	0	0	0
OTU_1156	Eukaryota	Alveolata	Dinophyta	Dinophyceae	Dinophyceae_X	Pfiesteriaceae	Multi-affiliation	Multi-affiliation	0	0	0	0	0	0	0	0	0	0	0	0	0	0	0	0	0	0	0	0	0	0	0	0	0	0	0	0	0	0	0	0	2	0
OTU_1157	Eukaryota	Alveolata	Dinophyta	Dinophyceae	Dinophyceae_X	Dinophyceae_XX	Gymnodinium	Gymnodinium_dorsalisulcum	0	0	1	0	0	0	0	0	0	0	0	0	0	0	0	0	0	0	0	0	0	0	0	0	0	0	0	0	0	0	0	0	0	0
OTU_1158	Eukaryota	Alveolata	Dinophyta	Dinophyceae	Suessiales	Suessiales_X	Woloszynskia	Woloszynskia_sp._strain1	0	0	0	0	0	0	0	1	0	0	0	0	2	0	0	0	0	0	0	0	0	2	0	0	0	0	0	0	0	0	0	0	0	0
OTU_1168	Eukaryota	Alveolata	Dinophyta	Dinophyceae	Dinophyceae_X	Dinophyceae_XX	Multi-affiliation	Multi-affiliation	0	0	0	0	5	0	0	0	0	0	0	0	0	0	0	0	0	0	0	0	0	0	0	0	0	0	0	0	0	0	0	0	0	0
OTU_1169	Eukaryota	Alveolata	Apicomplexa	Apicomplexa_X	Gregarines	Gregarines_X	Lankesteria	Lankesteria_cystodytae	0	0	0	0	0	0	0	0	0	0	0	0	0	0	0	0	0	0	0	0	0	0	0	4	0	0	0	0	0	0	0	0	0	0
OTU_1179	Eukaryota	Archaeplastida	Chlorophyta	Chlorophyceae	Sphaeropleales	Sphaeropleales_X	Selenastrum	Selenastrum_sp.	0	0	0	0	1	0	0	0	0	0	0	0	0	0	0	0	0	0	0	0	0	0	0	5	0	0	0	0	0	0	0	0	0	0
OTU_1182	Eukaryota	Alveolata	Dinophyta	Syndiniales	Dino-Group-I	Dino-Group-I-Clade-4	Euduboscquella	Euduboscquella_crenulata	0	0	0	0	0	0	0	0	0	0	0	0	0	0	0	0	0	0	0	0	0	0	0	0	0	4	0	0	0	0	0	0	0	0
OTU_1189	Eukaryota	Alveolata	Dinophyta	Syndiniales	Dino-Group-II	Dino-Group-II-Clade-3	Dino-Group-II-Clade-3_X	Dino-Group-II-Clade-3_X_sp.	0	0	0	0	0	0	0	0	0	0	0	0	0	0	0	0	0	0	0	0	0	0	0	0	0	0	0	0	0	0	0	0	4	0
OTU_1191	Eukaryota	Alveolata	Dinophyta	Dinophyceae	Dinophyceae_X	Dinophyceae_XX	Dinophyceae_XXX	Dinophyceae_XXX_sp.	0	0	0	0	0	0	0	0	0	0	0	0	0	0	0	0	0	0	0	0	0	0	0	0	0	0	0	0	0	4	0	0	0	0
OTU_1192	Eukaryota	Opisthokonta	Fungi	Basidiomycota	Pucciniomycotina	Pucciniomycetes	Multi-affiliation	Multi-affiliation	0	0	0	0	0	0	0	0	0	0	0	0	0	0	0	0	4	0	0	0	0	0	0	0	0	0	0	0	0	0	0	0	0	0
OTU_1195	Eukaryota	Stramenopiles	Ochrophyta	Bacillariophyta	Bacillariophyta_X	Raphid-pennate	Bacillaria	Bacillaria_paxillifer	0	0	0	0	0	0	0	0	0	0	0	0	0	0	0	0	0	0	0	0	0	0	0	3	0	0	0	0	0	0	0	0	0	0
OTU_1196	Eukaryota	Alveolata	Dinophyta	Dinophyceae	Suessiales	Suessiales_X	Symbiodinium	Symbiodinium_sp.	0	0	0	1	0	0	1	0	0	0	0	2	0	0	0	0	0	0	0	0	0	0	0	0	0	0	0	0	1	0	0	0	0	0
OTU_1198	Eukaryota	Alveolata	Dinophyta	Dinophyceae	Dinophyceae_X	Dinophyceae_XX	Gymnodinium	Gymnodinium_aureolum	0	0	5	0	0	0	0	0	0	0	0	0	0	0	0	0	0	0	0	0	0	0	0	0	0	0	0	0	0	0	0	0	0	0
OTU_1201	Eukaryota	Alveolata	Dinophyta	Dinophyceae	Dinophyceae_X	Dinophyceae_XX	Gymnodinium	Multi-affiliation	0	0	0	0	0	4	0	0	0	0	0	0	0	0	0	0	0	0	0	0	0	0	0	0	0	0	0	0	0	0	0	0	0	0
OTU_1202	Eukaryota	Alveolata	Dinophyta	Dinophyceae	Dinophyceae_X	Dinophyceae_XX	Gonyaulax	Gonyaulax_spinifera_strain1	0	0	0	0	0	0	0	0	0	0	0	0	0	0	0	0	0	0	0	0	0	0	0	0	0	0	0	0	0	0	5	0	0	0
OTU_1203	Eukaryota	Stramenopiles	Ochrophyta	Bacillariophyta	Bacillariophyta_X	Raphid-pennate	Raphid-pennate_X	Raphid-pennate_X_sp.	0	0	0	0	4	0	0	0	0	0	0	0	0	0	1	0	0	0	0	0	0	0	1	0	0	0	0	0	0	0	0	0	0	0
OTU_1212	Eukaryota	Stramenopiles	Stramenopiles_X	Labyrinthulea	Labyrinthulales	Labyrinthulaceae	Aplanochytrium	Aplanochytrium_sp.	0	0	0	0	0	0	0	0	0	0	0	0	0	0	0	0	0	4	0	0	0	0	0	0	0	0	0	0	0	0	0	0	0	0
OTU_1213	Eukaryota	Stramenopiles	Ochrophyta	Bacillariophyta	Bacillariophyta_X	Polar-centric-Mediophyceae	Multi-affiliation	Multi-affiliation	0	0	0	0	0	0	0	0	0	0	0	0	0	0	0	0	4	1	0	0	0	0	0	0	0	0	0	0	0	0	0	0	0	0
OTU_1214	Eukaryota	Stramenopiles	Stramenopiles_X	MAST	MAST-3	MAST-3J	MAST-3J_X	MAST-3J_X_sp.	4	0	0	0	0	0	0	0	0	0	0	0	0	0	0	0	0	0	0	0	0	0	0	0	0	0	0	0	0	0	0	0	0	0
OTU_1217	Eukaryota	Stramenopiles	Stramenopiles_X	Oomycota	Oomycota_X	Multi-affiliation	Multi-affiliation	Multi-affiliation	0	0	0	0	0	0	0	0	0	0	0	0	0	0	0	0	0	0	0	0	0	0	0	1	0	0	0	0	0	0	0	0	0	0
OTU_1219	Eukaryota	Stramenopiles	Stramenopiles_X	MAST	MAST-16	MAST-16_X	MAST-16_XX	MAST-16_XX_sp.	0	0	0	0	0	0	0	0	0	0	0	0	0	0	0	0	0	0	0	0	0	0	5	0	0	0	0	0	0	0	0	0	0	0
OTU_1226	Eukaryota	Alveolata	Dinophyta	Dinophyceae	Dinophyceae_X	Dinophyceae_XX	Dinophyceae_XXX	Dinophyceae_XXX_sp.	0	0	0	0	0	0	0	0	0	0	0	0	0	0	0	0	0	0	0	0	0	0	0	0	0	0	5	0	0	0	0	0	0	0
OTU_1228	Eukaryota	Amoebozoa	Lobosa	Tubulinea	Echinamoebida	Vermamoebidae	Hartmannella	Hartmannella_abertawensis	0	0	0	0	0	0	0	0	0	0	0	0	0	0	0	0	0	0	0	0	0	0	0	2	0	0	0	0	0	4	0	0	0	0
OTU_1230	Eukaryota	Stramenopiles	Stramenopiles_X	Placidideae	Placidiales	Placidiales_X	Placidia	Placidia_cafeteriopsis	0	0	0	0	0	0	0	0	0	0	0	0	0	0	0	0	0	0	0	0	0	0	0	0	1	0	0	0	0	0	0	0	0	0
OTU_1231	Eukaryota	Stramenopiles	Stramenopiles_X	Bicoecea	Anoecales	Caecitellaceae	Caecitellus	Caecitellus_parvulus	0	0	0	0	0	0	0	0	0	0	0	0	0	0	0	0	0	0	0	0	0	0	0	0	0	0	0	0	0	0	0	1	0	0
OTU_1233	Eukaryota	Hacrobia	Centroheliozoa	Centroheliozoa_X	Centroheliozoa_XX	Centroheliozoa_XXX	Centroheliozoa_XXXX	Centroheliozoa_XXXX_sp.	0	0	0	0	0	0	0	0	0	0	0	0	0	0	0	0	0	0	0	0	0	0	0	0	0	0	0	0	3	0	0	0	0	0
OTU_1234	Eukaryota	Alveolata	Ciliophora	Phyllopharyngea	Suctoria	Multi-affiliation	Multi-affiliation	Multi-affiliation	0	0	0	0	0	0	5	0	0	0	1	0	0	0	0	0	0	0	0	0	0	0	0	0	0	0	0	0	0	0	0	0	0	0
OTU_1235	Eukaryota	Alveolata	Ciliophora	Oligohymenophorea	Mobilida	Trichodinidae	Trichodina	Trichodina_ruditapicis	0	0	0	0	0	0	0	0	0	0	0	0	2	0	0	0	0	0	0	0	0	0	0	0	0	0	0	0	0	0	0	0	0	0
OTU_1236	Eukaryota	Alveolata	Dinophyta	Dinophyceae	Dinophyceae_X	Dinophyceae_XX	Protoperidinium	Protoperidinium_tricingulatum	4	0	0	0	0	0	0	0	0	0	0	0	0	0	0	0	0	0	0	0	0	0	0	0	0	0	0	0	0	0	0	0	0	0
OTU_1238	Eukaryota	Opisthokonta	Fungi	Multi-affiliation	Multi-affiliation	Multi-affiliation	Multi-affiliation	Multi-affiliation	0	0	0	0	2	0	0	0	0	0	0	0	0	0	0	0	0	0	0	0	0	0	0	0	0	0	0	0	0	0	0	0	0	0
OTU_1239	Eukaryota	Stramenopiles	Stramenopiles_X	Labyrinthulea	Thraustochytriales	Thraustochytriaceae	Thraustochytriaceae_X	Thraustochytriaceae_X_sp.	0	0	0	0	0	0	0	0	0	0	0	0	0	0	0	0	0	0	0	0	4	0	0	0	0	0	0	0	0	0	0	0	0	0
OTU_1240	Eukaryota	Alveolata	Apicomplexa	Apicomplexa_X	Gregarines	Gregarines_X	Lankesteria	Lankesteria_chelyosomae	0	0	0	0	0	0	0	0	0	0	0	0	0	0	2	0	0	0	0	0	0	0	0	2	0	0	0	0	0	0	0	0	0	0
OTU_1243	Eukaryota	Stramenopiles	Ochrophyta	Bacillariophyta	Bacillariophyta_X	Polar-centric-Mediophyceae	Cyclotella	Multi-affiliation	0	0	0	0	0	0	0	0	0	4	0	0	0	0	0	0	0	0	0	0	0	0	0	0	0	0	0	0	0	0	0	0	0	0
OTU_1250	Eukaryota	Alveolata	Dinophyta	Dinophyceae	Dinophyceae_X	Ostreopsidaceae	Coolia	Coolia_monotis	0	0	0	0	0	0	0	0	0	0	0	0	0	0	0	0	0	0	0	0	0	0	0	0	0	0	0	0	0	0	4	0	0	0
OTU_1251	Eukaryota	Alveolata	Ciliophora	Spirotrichea	Hypotrichia	Epiclintidae	Epiclintes	Epiclintes_auricularis	0	0	0	0	2	0	0	0	0	0	0	0	0	0	0	0	0	0	0	0	0	0	3	0	0	0	0	0	0	0	0	0	0	0
OTU_1252	Eukaryota	Archaeplastida	Chlorophyta	Chlorophyceae	Chlamydomonadales	Chlamydomonadales_X	Chlamydomonas	Chlamydomonas_sp.	0	0	0	0	0	0	0	0	0	0	0	0	4	0	0	0	0	0	0	0	0	0	0	0	0	0	0	0	0	0	0	0	0	0
OTU_1253	Eukaryota	Archaeplastida	Rhodophyta	Florideophyceae	Multi-affiliation	Multi-affiliation	Multi-affiliation	Multi-affiliation	0	0	0	0	0	0	0	0	0	0	0	0	0	0	0	0	0	0	0	0	0	0	0	5	0	0	0	0	0	0	0	0	0	0
OTU_1262	Eukaryota	Alveolata	Dinophyta	Dinophyceae	Dinophyceae_X	Dinophyceae_XX	Gymnodinium	Gymnodinium_eucyaneum	1	0	0	0	0	0	0	0	0	0	0	0	0	0	0	0	0	0	0	0	0	0	0	0	0	0	0	0	0	0	0	0	0	0
OTU_1272	Eukaryota	Stramenopiles	Ochrophyta	Bacillariophyta	Bacillariophyta_X	Araphid-pennate	Tabularia	Multi-affiliation	0	0	0	0	0	1	0	0	0	0	0	0	0	0	0	0	0	0	0	0	0	0	0	0	0	0	0	0	0	0	0	0	0	0
OTU_1274	Eukaryota	Stramenopiles	Ochrophyta	Bacillariophyta	Bacillariophyta_X	Raphid-pennate	Pleurosigma	Pleurosigma_intermedium	2	0	0	0	0	1	0	0	0	6	0	0	0	0	0	0	0	0	0	0	0	0	0	0	0	1	0	0	0	0	0	0	0	0
OTU_1287	Eukaryota	Rhizaria	Cercozoa	Filosa-Thecofilosea	Filosa-Thecofilosea_X	Mataza-lineage	Mataza-lineage_X	Multi-affiliation	1	0	0	0	0	0	3	0	0	0	0	0	0	0	0	0	0	0	0	0	0	0	0	0	0	0	0	0	0	0	0	0	0	0
OTU_1290	Eukaryota	Rhizaria	Cercozoa	Filosa-Thecofilosea	Cryomonadida	Protaspa-lineage	Protaspa-lineage_X	Protaspa-lineage_X_sp.	0	1	0	1	0	0	0	0	0	0	0	0	0	0	0	0	0	0	0	0	0	2	0	0	0	0	0	0	0	0	0	0	0	0
OTU_1292	Eukaryota	Archaeplastida	Chlorophyta	Chlorodendrophyceae	Chlorodendrales	Chlorodendraceae	Chlorodendrales_XX	Multi-affiliation	0	0	0	0	0	0	0	0	0	0	0	0	0	0	4	0	0	0	0	0	0	0	0	0	0	0	0	0	0	0	0	0	0	0
OTU_1294	Eukaryota	Amoebozoa	Lobosa	Tubulinea	Arcellinida	Arcellinida_X	Pyxidicula	Pyxidicula_operculata	0	0	0	0	0	0	0	0	0	0	0	0	0	0	0	0	0	0	0	0	0	0	3	0	0	0	0	0	0	0	0	0	0	0
OTU_1298	Eukaryota	Multi-affiliation	Multi-affiliation	Multi-affiliation	Multi-affiliation	Multi-affiliation	Multi-affiliation	Multi-affiliation	0	0	0	0	0	0	0	0	0	0	0	0	0	0	0	0	0	0	0	0	0	4	0	0	0	0	0	0	0	0	0	0	0	0
OTU_1300	Eukaryota	Alveolata	Dinophyta	Dinophyceae	Dinophyceae_X	Dinophyceae_XX	Dinophyceae_XXX	Dinophyceae_XXX_sp.	0	0	0	0	0	0	0	0	0	0	0	0	0	0	0	0	0	0	0	0	0	0	0	0	0	4	0	0	0	0	0	0	0	0
OTU_1302	Eukaryota	Archaeplastida	Rhodophyta	Florideophyceae	Ceramiales	Ceramiaceae	Ceramium	Ceramium_rubrum	0	0	0	0	0	0	0	0	0	0	4	0	0	0	0	0	0	0	0	0	0	0	0	0	0	0	0	0	0	0	0	0	0	0
OTU_1303	Eukaryota	Alveolata	Dinophyta	Dinophyceae	Dinophyceae_X	Dinophyceae_XX	Dinophyceae_XXX	Dinophyceae_XXX_sp.	0	0	0	0	0	0	0	0	0	0	0	0	0	0	0	0	0	0	0	2	0	0	0	0	0	0	0	0	0	0	0	1	0	0
OTU_1304	Eukaryota	Alveolata	Dinophyta	Dinophyceae	Dinophyceae_X	Dinophyceae_XX	Gymnodinium	Gymnodinium_dorsalisulcum	0	0	0	0	0	0	0	0	0	0	0	0	0	0	0	0	0	0	0	0	0	0	0	0	0	4	0	0	0	0	0	0	0	0
OTU_1308	Eukaryota	Alveolata	Dinophyta	Dinophyceae	Suessiales	Suessiales_X	Woloszynskia	Woloszynskia_sp._strain1	0	4	0	0	0	0	0	0	0	0	0	0	0	0	0	0	0	0	0	0	0	0	0	0	0	0	0	0	0	0	0	0	0	0
OTU_1321	Eukaryota	Opisthokonta	Fungi	Chytridiomycota	Chytridiomycotina	Chytridiomycetes	Multi-affiliation	Multi-affiliation	0	0	0	0	0	0	0	0	0	0	0	0	0	0	0	0	0	0	0	0	0	0	0	3	0	0	0	0	0	0	0	0	0	0
OTU_1322	Eukaryota	Multi-affiliation	Multi-affiliation	Multi-affiliation	Multi-affiliation	Multi-affiliation	Multi-affiliation	Multi-affiliation	0	0	0	0	0	0	0	0	0	0	0	0	0	0	0	0	0	0	0	0	0	0	0	0	0	0	0	0	0	0	3	0	0	0
OTU_1323	Eukaryota	Stramenopiles	Stramenopiles_X	Bicoecea	Anoecales	Caecitellaceae	Caecitellus	Caecitellus_parvulus	0	0	0	0	0	0	0	0	0	0	0	0	0	0	0	0	0	0	0	0	0	0	0	0	0	0	0	0	0	0	0	1	0	0
OTU_1332	Eukaryota	Opisthokonta	Fungi	Ascomycota	Saccharomycotina	Saccharomycetales	Multi-affiliation	Multi-affiliation	0	0	0	0	0	2	2	0	0	0	0	0	0	0	0	0	0	0	0	0	0	0	0	0	0	0	0	0	0	0	0	0	0	0
OTU_1333	Eukaryota	Alveolata	Apicomplexa	Apicomplexa_X	Apicomplexa_XX	Apicomplexa_XXX	Apicomplexa_XXXX	Apicomplexa_XXXX_sp.	0	0	0	0	0	0	0	0	0	0	0	0	0	0	0	0	0	0	0	0	0	0	3	0	0	0	0	0	0	0	0	0	0	0
OTU_1336	Eukaryota	Stramenopiles	Stramenopiles_X	Labyrinthulea	Thraustochytriales	Thraustochytriaceae	Thraustochytriaceae_X	Thraustochytriaceae_X_sp.	0	0	0	0	0	0	0	0	0	0	0	0	0	0	0	0	0	0	0	0	0	0	0	3	0	0	0	0	0	0	0	0	0	0
OTU_1338	Eukaryota	Alveolata	Apicomplexa	Apicomplexa_X	Coccidia	Eimeriidae	Eimeria	Eimeria_gruis	0	0	1	0	0	0	0	0	0	0	0	0	0	0	0	0	0	0	0	0	0	0	0	0	0	0	0	0	0	0	0	0	0	0
OTU_1340	Eukaryota	Alveolata	Apicomplexa	Apicomplexa_X	Gregarines	Gregarines_X	Gregarinidae	Gregarinidae_sp.	0	0	0	0	3	0	0	0	0	0	0	0	0	0	0	0	0	0	0	0	0	0	0	0	0	0	0	0	0	0	0	0	0	0
OTU_1342	Eukaryota	Alveolata	Apicomplexa	Apicomplexa_X	Gregarines	Gregarines_X	Lecudina	Lecudina_tuzetae	0	0	0	0	0	0	0	0	0	0	0	0	0	0	0	0	2	0	0	0	0	0	0	0	0	0	0	0	0	0	0	0	0	0
OTU_1343	Eukaryota	Stramenopiles	Stramenopiles_X	Oomycota	Oomycota_X	Saprolegniales	Leptolegnia	Leptolegnia_caudata	0	0	0	0	0	0	0	0	0	0	0	0	0	0	0	0	0	0	0	0	0	0	0	3	0	0	0	0	0	0	0	0	0	0
OTU_1346	Eukaryota	Opisthokonta	Fungi	Ascomycota	Saccharomycotina	Stephanoascales	Sugiyamaella	Sugiyamaella_smithiae	0	0	0	0	0	0	0	0	0	0	0	0	0	0	3	0	0	0	0	0	0	0	0	0	0	0	0	0	0	0	0	0	0	0
OTU_1361	Eukaryota	Stramenopiles	Ochrophyta	Bacillariophyta	Bacillariophyta_X	Raphid-pennate	Multi-affiliation	Multi-affiliation	0	0	0	0	0	0	0	0	0	0	0	0	0	0	0	4	0	0	0	0	0	0	0	0	0	0	0	0	0	0	0	0	0	0
OTU_1367	Eukaryota	Alveolata	Dinophyta	Dinophyceae	Dinophyceae_X	Pfiesteriaceae	Multi-affiliation	Multi-affiliation	0	0	0	0	0	0	0	0	0	0	0	0	0	0	0	0	0	0	5	0	0	0	0	0	0	0	0	0	0	0	0	0	0	0
OTU_1368	Eukaryota	Alveolata	Dinophyta	Dinophyceae	Dinophyceae_X	Dinophyceae_XX	Crypthecodinium	Crypthecodinium_sp.	0	0	0	0	0	0	0	0	0	0	0	0	0	0	0	0	0	0	0	0	0	0	0	3	0	0	0	0	0	0	0	0	0	0
OTU_1370	Eukaryota	Alveolata	Dinophyta	Dinophyceae	Suessiales	Suessiales_X	Multi-affiliation	Multi-affiliation	0	0	0	0	0	0	0	0	0	0	0	3	0	0	0	0	0	0	0	0	0	0	0	0	0	0	0	0	0	0	0	0	0	0
OTU_1372	Eukaryota	Alveolata	Dinophyta	Dinophyceae	Dinophyceae_X	Pfiesteriaceae	Pfiesteriaceae_X	Pfiesteriaceae_X_sp.	0	0	0	0	0	0	0	0	0	0	0	0	0	0	0	0	0	0	0	0	0	0	0	0	0	0	0	0	0	3	0	0	0	0
OTU_1375	Eukaryota	Alveolata	Dinophyta	Dinophyceae	Suessiales	Suessiales_X	Woloszynskia	Woloszynskia_sp._strain1	0	0	0	0	0	0	0	0	0	0	0	0	0	0	0	0	0	0	0	0	0	0	0	0	0	0	0	0	0	3	0	0	0	0
OTU_1377	Eukaryota	Alveolata	Dinophyta	Dinophyceae	Dinophyceae_X	Dinophyceae_XX	Gymnodinium	Gymnodinium_dorsalisulcum	0	6	0	0	0	0	0	0	0	0	0	0	0	0	0	0	0	0	0	0	0	0	0	0	0	0	0	0	0	0	0	0	0	0
OTU_1378	Eukaryota	Multi-affiliation	Multi-affiliation	Multi-affiliation	Multi-affiliation	Multi-affiliation	Multi-affiliation	Multi-affiliation	0	0	0	0	0	0	0	0	0	0	0	0	0	0	0	0	0	0	0	3	0	0	0	0	0	0	0	0	0	0	0	0	0	0
OTU_1380	Eukaryota	Stramenopiles	Ochrophyta	Bacillariophyta	Bacillariophyta_X	Raphid-pennate	Multi-affiliation	Multi-affiliation	0	0	0	0	0	0	0	0	0	0	0	0	0	0	0	0	0	0	0	0	0	0	3	0	0	0	0	0	0	0	0	0	0	0
OTU_1381	Eukaryota	Stramenopiles	Ochrophyta	Bacillariophyta	Bacillariophyta_X	Raphid-pennate	Bacillaria	Bacillaria_paxillifer	0	0	0	0	0	0	0	0	0	0	0	0	0	0	0	0	0	2	0	0	0	0	0	0	1	0	0	0	0	0	0	0	0	0
OTU_1384	Eukaryota	Alveolata	Dinophyta	Dinophyceae	Suessiales	Suessiales_X	Woloszynskia	Woloszynskia_sp._strain1	0	0	0	0	0	0	0	0	0	3	0	0	0	0	0	0	0	0	0	0	0	0	0	0	0	0	0	0	0	0	0	0	0	0
OTU_1389	Eukaryota	Alveolata	Dinophyta	Dinophyceae	Dinophyceae_X	Dinophyceae_XX	Multi-affiliation	Multi-affiliation	3	0	0	0	0	0	0	0	0	0	0	0	0	0	0	0	0	0	0	0	0	0	0	0	0	0	0	0	0	0	0	0	0	0
OTU_1390	Eukaryota	Alveolata	Dinophyta	Dinophyceae	Suessiales	Suessiales_X	Multi-affiliation	Multi-affiliation	0	0	0	0	0	3	0	0	0	0	0	0	0	0	0	0	0	0	0	0	0	1	0	0	0	0	0	0	0	0	0	0	0	0
OTU_1395	Eukaryota	Multi-affiliation	Multi-affiliation	Multi-affiliation	Multi-affiliation	Multi-affiliation	Multi-affiliation	Multi-affiliation	0	0	0	0	0	0	0	0	0	0	0	0	0	0	0	0	0	0	0	0	0	3	0	0	0	0	0	0	0	0	0	0	0	0
OTU_1397	Eukaryota	Alveolata	Dinophyta	Dinophyceae	Dinophyceae_X	Dinophyceae_XX	Gymnodinium	Gymnodinium_dorsalisulcum	0	0	0	0	0	0	0	0	0	0	0	0	3	0	0	0	0	0	0	0	0	0	0	0	0	0	0	4	0	0	0	0	0	0
OTU_1398	Eukaryota	Alveolata	Dinophyta	Dinophyceae	Dinophyceae_X	Dinophyceae_XX	Dinophyceae_XXX	Dinophyceae_XXX_sp.	0	0	0	0	0	0	0	0	0	0	0	0	0	0	0	0	0	0	0	0	0	0	0	0	0	0	3	0	0	0	0	0	0	0
OTU_1400	Eukaryota	Alveolata	Dinophyta	Dinophyceae	Suessiales	Suessiales_X	Woloszynskia	Woloszynskia_sp._strain1	0	0	0	0	0	3	0	0	0	0	0	0	0	0	0	0	0	0	0	0	0	0	0	0	0	0	0	0	0	0	0	0	0	0
OTU_1401	Eukaryota	Alveolata	Dinophyta	Dinophyceae	Suessiales	Suessiales_X	Woloszynskia	Woloszynskia_sp._strain1	0	0	0	0	0	0	0	0	0	0	0	0	0	0	0	0	0	0	0	0	0	0	0	0	0	0	0	0	0	0	3	0	0	0
OTU_1402	Eukaryota	Alveolata	Dinophyta	Dinophyceae	Suessiales	Suessiales_X	Woloszynskia	Woloszynskia_sp._strain1	0	0	0	0	0	0	0	0	0	0	0	0	0	0	0	0	0	0	0	0	0	0	0	0	0	3	0	0	0	0	0	0	0	0
OTU_1405	Eukaryota	Alveolata	Dinophyta	Dinophyceae	Suessiales	Suessiales_X	Woloszynskia	Woloszynskia_sp._strain1	3	0	0	0	0	0	0	0	0	0	0	0	0	0	0	0	0	0	0	0	0	0	0	0	1	0	0	0	0	0	0	0	0	0
OTU_1406	Eukaryota	Alveolata	Dinophyta	Dinophyceae	Suessiales	Suessiales_X	Suessiales_XX	Suessiales_XX_sp.	0	0	0	0	0	0	0	0	0	0	0	0	0	0	0	0	0	0	0	0	1	0	0	0	0	0	0	3	0	0	0	0	0	0
OTU_1407	Eukaryota	Alveolata	Dinophyta	Dinophyceae	Multi-affiliation	Multi-affiliation	Multi-affiliation	Multi-affiliation	1	0	0	0	0	1	0	1	0	1	0	0	0	0	0	0	0	0	1	0	1	0	0	0	2	1	1	0	0	0	0	0	0	0
OTU_1409	Eukaryota	Alveolata	Dinophyta	Dinophyceae	Dinophyceae_X	Dinophyceae_XX	Alexandrium	Multi-affiliation	0	0	0	0	0	0	0	0	0	0	0	0	0	0	0	0	0	0	3	0	0	0	0	0	0	0	0	0	0	0	0	0	0	0
OTU_1412	Eukaryota	Alveolata	Dinophyta	Dinophyceae	Dinophyceae_X	Dinophyceae_XX	Dinophyceae_XXX	Dinophyceae_XXX_sp.	0	0	0	0	0	0	0	0	0	0	0	0	0	0	0	0	0	0	0	0	0	0	0	0	0	0	0	0	0	3	0	0	0	0
OTU_1414	Eukaryota	Alveolata	Dinophyta	Dinophyceae	Dinophyceae_X	Dinophyceae_XX	Protoperidinium	Protoperidinium_bipes	3	0	0	0	0	0	0	0	0	0	0	0	0	0	0	0	0	0	0	0	0	0	0	0	0	0	0	0	0	0	0	0	0	0
OTU_1415	Eukaryota	Alveolata	Dinophyta	Dinophyceae	Dinophyceae_X	Dinophyceae_XX	Gymnodinium	Gymnodinium_sp.	0	0	0	0	0	0	0	0	0	0	0	0	0	0	0	0	0	0	0	0	0	0	0	0	0	0	0	0	0	0	0	0	0	1
OTU_1416	Eukaryota	Alveolata	Dinophyta	Dinophyceae	Suessiales	Suessiales_X	Woloszynskia	Woloszynskia_sp._strain1	0	0	0	0	0	0	0	0	0	0	0	0	0	0	0	0	0	0	0	0	0	3	0	0	0	0	0	0	0	0	0	0	0	0
OTU_1422	Eukaryota	Alveolata	Dinophyta	Dinophyceae	Dinophyceae_X	Dinophyceae_XX	Gymnodinium	Gymnodinium_dorsalisulcum	0	0	0	0	0	0	0	0	0	0	0	0	0	0	0	0	0	0	0	0	0	0	0	0	0	0	0	0	0	0	3	0	0	0
OTU_1425	Eukaryota	Stramenopiles	Ochrophyta	Bacillariophyta	Bacillariophyta_X	Polar-centric-Mediophyceae	Cyclotella	Multi-affiliation	0	0	0	0	0	3	0	0	0	0	0	0	0	0	0	0	0	0	0	0	0	0	0	0	0	0	0	0	0	0	0	0	0	0
OTU_1426	Eukaryota	Stramenopiles	Stramenopiles_X	MAST	MAST-3	MAST-3J	MAST-3J_X	MAST-3J_X_sp.	0	0	0	0	0	0	0	0	0	0	0	0	0	0	0	0	0	0	0	0	0	0	0	3	0	0	0	0	0	0	0	0	0	0
OTU_1427	Eukaryota	Alveolata	Dinophyta	Multi-affiliation	Multi-affiliation	Multi-affiliation	Multi-affiliation	Multi-affiliation	0	0	0	0	0	0	0	0	0	0	0	0	0	0	0	0	0	0	0	0	0	3	0	0	0	0	0	0	0	0	0	0	0	0
OTU_1428	Eukaryota	Stramenopiles	Ochrophyta	Bacillariophyta	Bacillariophyta_X	Radial-centric-basal-Coscinodiscophyceae	Paralia	Paralia_sulcata	0	0	0	0	4	0	0	0	0	0	0	0	0	0	0	0	0	0	0	0	0	0	0	0	0	0	0	0	0	0	0	0	0	0
OTU_1432	Eukaryota	Stramenopiles	Ochrophyta	Bacillariophyta	Bacillariophyta_X	Polar-centric-Mediophyceae	Multi-affiliation	Multi-affiliation	0	0	0	0	0	0	0	0	0	0	0	0	0	0	0	0	0	3	0	0	0	0	0	1	0	0	0	0	0	0	0	0	0	0
OTU_1459	Eukaryota	Opisthokonta	Choanoflagellida	Choanoflagellatea	Craspedida	Monosigidae_Group_B	Monosigidae_Group_B_X	Monosigidae_Group_B_X_sp.	0	0	0	0	0	0	0	0	0	0	0	0	0	0	0	0	0	0	0	0	0	0	0	3	0	0	0	0	0	0	0	0	0	0
OTU_1469	Eukaryota	Alveolata	Ciliophora	Phyllopharyngea	Phyllopharyngea_X	Phyllopharyngea_XX	Phyllopharyngea_XXX	Phyllopharyngea_XXX_sp.	0	0	0	0	0	0	0	0	0	0	0	3	0	0	0	0	0	0	0	0	0	0	0	0	0	0	0	0	0	0	0	0	0	0
OTU_1471	Eukaryota	Alveolata	Ciliophora	Phyllopharyngea	Phyllopharyngea_X	Phyllopharyngea_XX	Phyllopharyngea_XXX	Phyllopharyngea_XXX_sp.	0	0	0	0	0	0	0	0	0	2	0	0	1	0	0	0	0	0	0	0	0	0	0	0	0	0	0	0	0	0	0	0	0	0
OTU_1472	Eukaryota	Alveolata	Dinophyta	Dinophyceae	Dinophyceae_X	Dinophyceae_XX	Archaeperidinium	Multi-affiliation	0	0	0	0	0	0	0	0	0	0	0	0	0	0	0	0	0	3	0	0	0	0	0	0	0	0	0	0	0	0	0	0	0	0
OTU_1474	Eukaryota	Opisthokonta	Fungi	Chytridiomycota	Chytridiomycotina	Chytridiomycetes	Multi-affiliation	Multi-affiliation	0	0	0	0	0	0	0	0	0	0	0	0	0	0	0	0	0	0	0	0	0	0	0	4	0	0	0	0	0	0	0	0	0	0
OTU_1475	Eukaryota	Alveolata	Dinophyta	Dinophyceae	Suessiales	Suessiales_X	Pelagodinium	Pelagodinium_beii	0	0	0	0	0	0	0	0	0	0	0	0	0	0	0	0	0	0	0	0	3	0	0	0	0	0	0	0	0	0	0	0	0	0
OTU_1476	Eukaryota	Alveolata	Apicomplexa	Apicomplexa_X	Gregarines	Gregarines_X	Selenidium	Selenidium_serpulae	3	0	0	0	0	0	0	0	0	0	0	0	0	0	0	0	0	0	0	0	0	0	0	0	0	0	0	0	0	0	0	0	0	0
OTU_1477	Eukaryota	Alveolata	Apicomplexa	Apicomplexa_X	Novel-Apicomplexa-Class-1	Novel-Apicomplexa-Class-1_X	Novel-Apicomplexa-Class-1_XX	Novel-Apicomplexa-Class-1_XX_sp.	0	0	0	0	0	3	0	0	0	0	0	0	0	0	0	0	0	0	0	0	0	0	0	0	0	0	0	0	0	0	0	0	0	0
OTU_1479	Eukaryota	Alveolata	Ciliophora	Litostomatea	Haptoria	Litonotidae	Litonotidae_X	Litonotidae_X_sp.	3	0	0	0	0	0	0	0	0	0	0	0	0	0	0	0	0	0	0	0	0	0	0	0	0	0	0	0	0	0	0	0	0	0
OTU_1481	Eukaryota	Alveolata	Ciliophora	Oligohymenophorea	Mobilida	Trichodinidae	Trichodina	Trichodina_ruditapicis	3	0	0	0	0	0	0	0	0	0	0	0	0	0	0	0	0	0	0	0	0	0	0	0	0	0	0	0	0	0	0	0	0	0
OTU_1494	Eukaryota	Alveolata	Dinophyta	Dinophyceae	Dinophyceae_X	Ostreopsidaceae	Coolia	Coolia_monotis	0	0	0	0	0	0	0	0	0	0	0	0	0	0	0	0	0	0	0	0	0	0	0	0	0	0	0	0	3	0	0	0	0	0
OTU_1495	Eukaryota	Alveolata	Apicomplexa	Apicomplexa_X	Gregarines	Gregarines_X	Lankesteria	Lankesteria_cystodytae	0	0	0	0	3	0	0	0	0	0	0	0	0	0	0	0	0	0	0	0	0	0	0	0	0	0	0	0	0	0	0	0	0	0
OTU_1501	Eukaryota	Alveolata	Apicomplexa	Apicomplexa_X	Gregarines	Gregarines_X	Gregarines_XX	Gregarines_XX_sp.	0	0	0	0	0	0	0	0	0	0	0	0	0	0	4	0	0	0	0	0	0	0	0	0	0	0	0	0	0	0	0	0	0	0
OTU_1507	Eukaryota	Stramenopiles	Stramenopiles_X	Labyrinthulea	Thraustochytriales	Thraustochytriaceae	Thraustochytrium	Thraustochytrium_striatum	0	0	0	0	0	0	0	0	0	0	0	0	0	0	0	0	0	0	0	0	0	0	0	4	0	0	0	0	0	0	0	0	0	0
OTU_1509	Eukaryota	Alveolata	Apicomplexa	Apicomplexa_X	Gregarines	Gregarines_X	Lecudina	Lecudina_tuzetae	0	0	0	0	0	0	4	0	0	0	0	0	0	0	0	0	0	0	0	0	0	0	0	0	0	0	0	0	0	0	0	0	0	0
OTU_1510	Eukaryota	Alveolata	Ciliophora	Oligohymenophorea	Scuticociliatia	Cyclidiidae	Cyclidium	Cyclidium_glaucoma	0	0	0	0	0	0	0	0	0	0	0	0	0	0	0	0	0	0	0	0	0	0	0	0	0	0	0	0	0	0	0	3	0	0
OTU_1511	Eukaryota	Alveolata	Apicomplexa	Apicomplexa_X	Gregarines	Gregarines_X	Gregarinidae	Gregarinidae_sp.	0	0	0	0	0	0	0	0	0	3	0	0	0	0	0	0	0	0	0	0	0	0	0	0	0	0	0	0	0	0	0	0	0	0
OTU_1514	Eukaryota	Alveolata	Ciliophora	Spirotrichea	Oligotrichia	Multi-affiliation	Multi-affiliation	Multi-affiliation	3	0	0	0	0	0	0	0	0	0	0	0	0	0	0	0	0	0	0	0	0	0	0	0	0	0	0	0	0	0	0	0	0	0
OTU_1517	Eukaryota	Alveolata	Dinophyta	Dinophyceae	Dinophyceae_X	Dinophyceae_XX	Dinophyceae_XXX	Dinophyceae_XXX_sp.	0	0	0	0	0	0	0	0	0	0	0	0	0	0	0	0	0	0	0	0	0	0	0	0	0	0	0	0	0	2	0	0	0	0
OTU_1518	Eukaryota	Hacrobia	Cryptophyta	Cryptophyceae	Cryptophyceae_X	Cryptomonadales	Rhodomonas	Rhodomonas_abbreviata	0	0	0	0	1	0	0	0	0	0	0	0	0	0	0	0	2	0	0	0	0	0	0	0	0	0	0	0	0	0	0	0	0	0
OTU_1525	Eukaryota	Archaeplastida	Chlorophyta	Chlorophyceae	Chlamydomonadales	Chlamydomonadales_X	Chlamydomonas	Chlamydomonas_sp.	0	0	0	0	0	0	5	0	0	0	0	0	0	0	0	0	0	0	0	0	0	0	0	0	0	0	0	0	0	0	0	0	0	0
OTU_1526	Eukaryota	Archaeplastida	Chlorophyta	Chlorophyceae	Sphaeropleales	Selenastraceae	Monoraphidium	Multi-affiliation	0	0	0	0	0	0	0	0	0	0	0	0	0	0	2	0	0	0	0	0	0	0	0	0	0	0	0	0	0	0	0	0	0	0
OTU_1527	Eukaryota	Archaeplastida	Chlorophyta	Chlorophyceae	Sphaeropleales	Sphaeropleales_X	Multi-affiliation	Multi-affiliation	0	0	0	0	0	0	2	0	0	0	0	0	0	0	0	0	4	0	0	0	0	0	0	0	0	0	0	0	0	0	0	0	0	0
OTU_1528	Eukaryota	Alveolata	Dinophyta	Syndiniales	Dino-Group-II	Dino-Group-II_X	Dino-Group-II_XX	Dino-Group-II_XX_sp.	0	0	2	0	0	0	0	0	0	0	0	1	0	0	0	0	0	0	0	0	0	0	0	0	0	0	0	0	0	0	0	0	0	0
OTU_1529	Eukaryota	Opisthokonta	Mesomycetozoa	Ichthyosporea	Ichthyosphonida	Abeoformidae_Group_MAIP_4	Abeoformidae_Group_MAIP_4_X	Abeoformidae_Group_MAIP_4_X_sp.	0	0	0	0	0	0	0	0	0	0	0	0	0	0	3	0	0	0	0	0	0	0	0	0	0	0	0	0	0	0	0	0	0	0
OTU_1531	Eukaryota	Alveolata	Dinophyta	Dinophyceae	Dinophyceae_X	Ostreopsidaceae	Coolia	Coolia_monotis	0	0	0	0	0	0	0	0	0	0	0	0	3	0	0	0	0	0	0	0	0	0	0	0	0	0	0	0	0	0	0	0	0	0
OTU_1545	Eukaryota	Archaeplastida	Rhodophyta	Florideophyceae	Ceramiales	Ceramiaceae	Ceramium	Ceramium_diaphanum	0	0	0	0	0	0	3	0	0	0	0	0	0	0	0	0	0	0	0	0	0	0	0	0	0	0	0	0	0	0	0	0	0	0
OTU_1547	Eukaryota	Alveolata	Dinophyta	Dinophyceae	Dinophyceae_X	Dinophyceae_XX	Dinophyceae_XXX	Dinophyceae_XXX_sp.	0	0	0	0	0	0	0	2	0	0	0	0	0	0	0	0	0	0	0	0	0	0	0	0	0	0	0	1	0	0	0	0	0	0
OTU_1548	Eukaryota	Alveolata	Dinophyta	Dinophyceae	Suessiales	Suessiales_X	Symbiodinium	Multi-affiliation	0	0	0	0	0	0	0	1	0	0	0	0	0	0	0	0	0	0	0	0	0	0	0	0	0	0	0	0	0	0	0	0	0	0
OTU_1549	Eukaryota	Stramenopiles	Ochrophyta	Bacillariophyta	Bacillariophyta_X	Raphid-pennate	Navicula	Multi-affiliation	0	0	0	0	0	0	0	0	0	0	0	0	0	0	0	0	0	0	0	0	0	0	4	0	0	0	0	0	0	0	0	0	0	0
OTU_1550	Eukaryota	Alveolata	Ciliophora	Spirotrichea	Protocruziida	Protocruziida_X	Protocruzia	Protocruzia_adherens	0	0	0	0	0	0	0	0	0	0	0	0	0	0	0	0	0	0	0	0	0	0	0	3	0	0	0	0	0	0	0	0	0	0
OTU_1551	Eukaryota	Alveolata	Dinophyta	Dinophyceae	Dinophyceae_X	Dinophyceae_XX	Dinophyceae_XXX	Dinophyceae_XXX_sp.	0	0	0	3	0	0	0	0	0	0	0	0	0	0	0	0	0	0	0	0	0	0	0	0	0	0	0	0	0	0	0	0	0	0
OTU_1552	Eukaryota	Alveolata	Dinophyta	Dinophyceae	Dinophyceae_X	Dinophyceae_XX	Dinophyceae_XXX	Dinophyceae_XXX_sp.	0	0	0	0	0	0	0	0	0	0	0	0	3	0	0	0	0	0	0	0	0	0	0	0	0	0	0	0	0	0	0	0	0	0
OTU_1553	Eukaryota	Alveolata	Dinophyta	Dinophyceae	Dinophyceae_X	Dinophyceae_XX	Dinophyceae_XXX	Dinophyceae_XXX_sp.	0	0	0	0	0	0	0	0	0	0	0	4	0	0	0	0	0	0	0	0	0	0	0	0	0	0	0	0	0	0	0	0	0	0
OTU_1554	Eukaryota	Alveolata	Dinophyta	Dinophyceae	Dinophyceae_X	Dinophyceae_XX	Gymnodinium	Gymnodinium_dorsalisulcum	0	0	0	0	0	0	0	0	0	0	0	0	0	3	0	0	0	0	0	0	0	0	0	0	0	0	0	0	0	0	0	0	0	0
OTU_1555	Eukaryota	Alveolata	Dinophyta	Dinophyceae	Dinophyceae_X	Dinophyceae_XX	Dinophyceae_XXX	Dinophyceae_XXX_sp.	0	0	0	0	0	0	0	0	0	0	0	0	0	0	0	0	0	0	0	0	0	0	0	0	0	0	0	0	0	0	0	4	0	0
OTU_1558	Eukaryota	Alveolata	Dinophyta	Dinophyceae	Suessiales	Suessiales_X	Woloszynskia	Woloszynskia_sp._strain1	3	0	0	0	0	0	0	0	0	0	0	0	0	0	0	0	0	0	0	0	0	0	0	0	0	0	0	0	0	0	0	0	0	0
OTU_1559	Eukaryota	Alveolata	Dinophyta	Dinophyceae	Dinophyceae_X	Dinophyceae_XX	Gonyaulax	Gonyaulax_spinifera_strain1	0	0	0	0	0	0	0	0	0	0	0	0	0	0	0	3	0	0	0	0	0	0	0	0	0	0	0	0	0	0	0	0	0	0
OTU_1564	Eukaryota	Alveolata	Dinophyta	Dinophyceae	Dinophyceae_X	Dinophyceae_XX	Multi-affiliation	Multi-affiliation	0	0	0	0	0	0	0	0	0	0	0	0	3	0	0	0	0	0	0	0	0	0	0	0	0	0	0	0	0	0	0	0	0	0
OTU_1568	Eukaryota	Alveolata	Dinophyta	Dinophyceae	Suessiales	Suessiales_X	Woloszynskia	Woloszynskia_halophila	0	0	0	0	0	0	0	0	0	0	0	0	0	0	0	0	0	0	0	0	0	0	0	0	0	0	0	3	0	0	0	0	0	0
OTU_1569	Eukaryota	Multi-affiliation	Multi-affiliation	Multi-affiliation	Multi-affiliation	Multi-affiliation	Multi-affiliation	Multi-affiliation	0	0	0	0	0	0	0	0	0	0	0	0	0	0	0	0	0	0	0	0	0	0	0	0	0	0	0	4	0	0	0	0	0	0
OTU_1572	Eukaryota	Multi-affiliation	Multi-affiliation	Multi-affiliation	Multi-affiliation	Multi-affiliation	Multi-affiliation	Multi-affiliation	0	0	0	0	0	0	0	0	4	0	0	0	0	0	0	0	0	0	0	0	0	0	0	0	0	0	0	0	0	0	0	2	0	0
OTU_1573	Eukaryota	Alveolata	Dinophyta	Dinophyceae	Dinophyceae_X	Dinophyceae_XX	Dinophyceae_XXX	Dinophyceae_XXX_sp.	0	0	0	0	0	0	0	0	0	0	0	0	0	0	0	0	0	0	0	0	3	0	0	0	0	0	0	0	0	0	0	0	0	0
OTU_1575	Eukaryota	Alveolata	Dinophyta	Dinophyceae	Dinophyceae_X	Dinophyceae_XX	Gymnodinium	Gymnodinium_dorsalisulcum	0	0	0	3	0	0	0	0	0	0	0	0	0	0	0	0	0	0	0	0	0	0	0	0	0	0	0	0	0	0	0	0	0	0
OTU_1576	Eukaryota	Alveolata	Dinophyta	Dinophyceae	Multi-affiliation	Multi-affiliation	Multi-affiliation	Multi-affiliation	0	0	0	0	0	0	0	0	0	0	0	0	0	0	0	0	0	0	0	0	0	0	0	0	0	1	0	0	0	0	0	4	0	0
OTU_1577	Eukaryota	Alveolata	Dinophyta	Dinophyceae	Dinophyceae_X	Dinophyceae_XX	Dinophyceae_XXX	Dinophyceae_XXX_sp.	0	0	0	0	0	0	0	0	0	0	0	0	0	0	0	0	0	0	0	0	0	0	0	0	0	0	3	0	0	0	0	0	0	0
OTU_1579	Eukaryota	Alveolata	Dinophyta	Dinophyceae	Suessiales	Suessiales_X	Woloszynskia	Woloszynskia_sp._strain1	0	0	0	0	0	0	0	0	0	0	0	0	0	0	0	0	0	0	0	0	0	0	0	0	3	0	0	0	0	0	0	0	0	0
OTU_1581	Eukaryota	Alveolata	Dinophyta	Dinophyceae	Suessiales	Suessiales_X	Woloszynskia	Woloszynskia_sp._strain1	0	0	0	0	0	0	0	3	0	0	0	0	0	0	0	0	0	0	0	0	0	0	0	0	0	0	0	0	0	0	0	0	0	0
OTU_1584	Eukaryota	Alveolata	Dinophyta	Dinophyceae	Suessiales	Suessiales_X	Woloszynskia	Woloszynskia_sp._strain1	0	0	0	0	0	0	0	0	0	0	0	0	0	0	0	0	0	0	0	0	0	0	0	0	3	0	0	0	0	0	0	0	0	0
OTU_1585	Eukaryota	Alveolata	Dinophyta	Dinophyceae	Suessiales	Suessiales_X	Suessiales_XX	Suessiales_XX_sp.	0	0	4	0	0	0	0	0	0	0	0	0	0	0	0	0	0	0	0	0	0	0	0	0	0	0	0	0	0	0	0	0	0	0
OTU_1586	Eukaryota	Multi-affiliation	Multi-affiliation	Multi-affiliation	Multi-affiliation	Multi-affiliation	Multi-affiliation	Multi-affiliation	0	0	0	0	0	0	0	0	0	0	0	0	0	0	0	0	0	0	3	0	0	0	0	0	0	0	0	0	0	0	0	0	0	0
OTU_1588	Eukaryota	Alveolata	Dinophyta	Dinophyceae	Suessiales	Suessiales_X	Suessiales_XX	Suessiales_XX_sp.	0	0	0	0	0	0	0	0	0	0	0	0	0	0	0	0	0	0	0	0	0	0	0	0	0	0	0	0	3	0	0	0	0	0
OTU_1590	Eukaryota	Alveolata	Dinophyta	Dinophyceae	Suessiales	Suessiales_X	Woloszynskia	Woloszynskia_sp._strain1	0	0	0	0	0	0	0	0	0	0	0	0	0	0	0	0	0	0	0	0	0	0	0	0	0	0	0	0	3	0	0	0	0	0
OTU_1601	Eukaryota	Alveolata	Dinophyta	Syndiniales	Dino-Group-II	Dino-Group-II-Clade-10-and-11	Dino-Group-II-Clade-10-and-11_X	Dino-Group-II-Clade-10-and-11_X_sp.	3	0	0	0	0	0	0	0	0	0	0	0	0	0	0	0	0	0	0	0	0	0	0	0	0	0	0	0	0	0	0	0	0	0
OTU_1609	Eukaryota	Alveolata	Dinophyta	Dinophyceae	Multi-affiliation	Multi-affiliation	Multi-affiliation	Multi-affiliation	0	3	0	0	0	0	0	0	0	0	0	0	0	0	0	0	0	0	0	0	0	0	0	0	0	0	0	0	0	0	0	0	0	0
OTU_1612	Eukaryota	Opisthokonta	Fungi	Basidiomycota	Pucciniomycotina	Cystobasidiomycetes	Rhodotorula	Rhodotorula_laryngis	0	0	0	0	0	0	0	0	0	0	0	0	0	0	0	0	0	0	0	0	0	0	0	3	0	0	0	0	0	0	0	0	0	0
OTU_1614	Eukaryota	Stramenopiles	Ochrophyta	Bacillariophyta	Bacillariophyta_X	Polar-centric-Mediophyceae	Multi-affiliation	Multi-affiliation	0	0	0	0	0	0	0	0	0	0	0	0	0	0	0	0	0	0	0	0	0	0	0	3	0	0	0	0	0	0	0	0	0	0
OTU_1649	Eukaryota	Stramenopiles	Stramenopiles_X	MAST	MAST-6	MAST-6_X	MAST-6_XX	MAST-6_XX_sp.	0	0	0	0	0	0	0	0	0	0	0	0	0	0	5	0	0	0	0	0	0	0	0	0	0	0	0	0	0	0	0	0	0	0
OTU_1658	Eukaryota	Rhizaria	Cercozoa	Cercozoa_X	Cercozoa_XX	Cercozoa_XXX	Cercozoa_XXXX	Cercozoa_XXXX_sp.	0	0	0	0	0	0	0	0	0	0	0	0	0	0	0	0	0	0	3	0	0	0	0	0	0	0	0	0	0	0	0	0	0	0
OTU_1666	Eukaryota	Alveolata	Apicomplexa	Apicomplexa_X	Gregarines	Gregarines_X	Selenidium	Selenidium_sp.	0	0	0	0	0	0	0	0	0	0	0	0	0	0	0	4	0	0	0	0	0	0	0	0	0	0	0	0	0	0	0	0	0	0
OTU_1667	Eukaryota	Alveolata	Dinophyta	Dinophyceae	Dinophyceae_X	Ostreopsidaceae	Coolia	Coolia_monotis	0	0	0	0	0	0	0	3	0	0	0	0	0	0	0	0	0	0	0	0	0	0	0	0	0	0	0	0	0	0	0	0	0	0
OTU_1670	Eukaryota	Alveolata	Ciliophora	Phyllopharyngea	Cyrtophoria	Hartmannulidae	Trichopodiella	Trichopodiella_faurei	0	0	0	0	0	0	0	0	0	0	0	0	0	0	0	0	0	0	0	0	0	0	0	4	0	0	0	0	0	0	0	0	0	0
OTU_1675	Eukaryota	Alveolata	Dinophyta	Dinophyceae	Dinophyceae_X	Dinophyceae_XX	Dinophyceae_XXX	Dinophyceae_XXX_sp.	0	0	0	0	0	0	0	0	0	0	0	0	0	0	0	0	0	0	0	0	0	0	0	0	0	4	0	0	0	0	0	0	0	0
OTU_1676	Eukaryota	Alveolata	Apicomplexa	Apicomplexa_X	Gregarines	Gregarines_X	Lecudina	Lecudina_tuzetae	0	0	0	0	0	0	0	0	0	0	0	0	0	0	0	0	0	0	0	0	0	0	0	0	0	3	0	0	0	0	0	0	0	0
OTU_1677	Eukaryota	Stramenopiles	Stramenopiles_X	Labyrinthulea	Thraustochytriales	Thraustochytriaceae	Thraustochytrium	Thraustochytrium_kinnei	0	0	0	0	0	0	0	0	0	0	0	0	0	0	0	0	0	0	0	0	0	0	3	0	0	0	0	0	0	0	0	0	0	0
OTU_1679	Eukaryota	Stramenopiles	Ochrophyta	Bacillariophyta	Bacillariophyta_X	Raphid-pennate	Diadesmis	Diadesmis_gallica	0	0	0	0	0	0	0	0	0	0	0	0	0	0	0	0	0	0	0	0	0	0	0	3	0	0	0	0	0	0	0	0	0	0
OTU_1681	Eukaryota	Alveolata	Dinophyta	Dinophyceae	Suessiales	Suessiales_X	Woloszynskia	Woloszynskia_sp._strain1	0	0	0	0	0	3	0	0	0	0	0	0	0	0	0	0	0	0	0	0	0	0	0	0	0	0	0	0	0	0	0	0	0	0
OTU_1682	Eukaryota	Alveolata	Dinophyta	Dinophyceae	Dinophyceae_X	Dinophyceae_XX	Dinophyceae_XXX	Dinophyceae_XXX_sp.	0	0	0	0	0	0	0	0	0	0	0	0	0	0	0	0	0	0	0	0	0	0	0	0	0	0	3	0	0	0	0	0	0	0
OTU_1683	Eukaryota	Alveolata	Dinophyta	Dinophyceae	Dinophyceae_X	Dinophyceae_XX	Dinophyceae_XXX	Dinophyceae_XXX_sp.	0	0	0	0	0	0	0	0	0	0	0	3	0	0	0	0	0	0	0	0	0	0	0	0	0	0	0	0	0	0	0	0	0	0
OTU_1688	Eukaryota	Opisthokonta	Choanoflagellida	Choanoflagellatea	Craspedida	Monosigidae_Group_M	Multi-affiliation	Multi-affiliation	0	0	0	0	0	0	0	0	0	0	0	0	0	0	0	0	0	3	0	0	0	0	0	0	0	0	0	0	0	0	0	0	0	0
OTU_1693	Eukaryota	Alveolata	Dinophyta	Dinophyceae	Dinophyceae_X	Dinophyceae_XX	Gymnodinium	Gymnodinium_dorsalisulcum	0	0	0	0	0	0	0	0	0	0	0	0	0	0	0	0	0	0	0	0	0	3	0	0	0	0	0	0	0	0	0	0	0	0
OTU_1694	Eukaryota	Alveolata	Dinophyta	Dinophyceae	Suessiales	Suessiales_X	Suessiales_XX	Suessiales_XX_sp.	0	0	3	0	0	0	0	0	0	0	0	0	0	0	0	0	0	0	0	0	0	0	0	0	0	0	0	0	0	0	0	0	0	0
OTU_1696	Eukaryota	Alveolata	Dinophyta	Dinophyceae	Dinophyceae_X	Dinophyceae_XX	Dinophyceae_XXX	Dinophyceae_XXX_sp.	0	0	0	0	0	0	0	0	0	0	0	0	0	0	0	0	0	0	0	0	0	0	0	0	0	0	0	0	0	4	0	0	0	0
OTU_1697	Eukaryota	Alveolata	Dinophyta	Dinophyceae	Dinophyceae_X	Dinophyceae_XX	Dinophyceae_XXX	Dinophyceae_XXX_sp.	0	0	0	0	0	0	0	0	0	0	0	0	0	0	0	0	0	0	0	0	0	0	0	0	0	0	0	0	0	3	0	0	0	0
OTU_1701	Eukaryota	Stramenopiles	Ochrophyta	Bacillariophyta	Bacillariophyta_X	Raphid-pennate	Navicula	Navicula_phyllepta	0	0	0	0	0	0	0	0	0	0	0	0	0	0	0	0	0	0	5	0	0	0	0	0	0	0	0	0	0	0	0	0	0	0
OTU_1709	Eukaryota	Alveolata	Dinophyta	Dinophyceae	Dinophyceae_X	Dinophyceae_XX	Multi-affiliation	Multi-affiliation	0	0	0	0	0	0	0	0	0	0	0	0	0	0	0	0	0	0	0	0	0	0	0	0	0	0	0	0	0	3	0	0	0	0
OTU_1710	Eukaryota	Alveolata	Dinophyta	Dinophyceae	Dinophyceae_X	Dinophyceae_XX	Dinophyceae_XXX	Dinophyceae_XXX_sp.	0	0	0	0	0	0	0	0	4	0	0	0	0	0	0	0	0	0	0	0	0	0	0	0	0	0	0	0	0	0	0	0	0	0
OTU_1714	Eukaryota	Alveolata	Dinophyta	Dinophyceae	Suessiales	Suessiales_X	Woloszynskia	Woloszynskia_sp._strain1	0	0	0	0	0	0	0	0	0	0	0	0	0	0	0	0	0	0	0	0	0	0	0	0	0	1	0	0	0	0	0	0	0	0
OTU_1715	Eukaryota	Multi-affiliation	Multi-affiliation	Multi-affiliation	Multi-affiliation	Multi-affiliation	Multi-affiliation	Multi-affiliation	0	0	0	0	0	3	0	0	0	0	0	0	0	0	0	0	0	0	0	0	0	0	0	0	0	0	0	0	0	0	0	0	0	0
OTU_1716	Eukaryota	Alveolata	Dinophyta	Dinophyceae	Dinophyceae_X	Dinophyceae_XX	Alexandrium	Multi-affiliation	0	0	0	0	0	0	0	0	0	0	0	0	0	0	0	0	0	3	0	0	0	0	0	0	0	0	0	0	0	0	0	0	0	0
OTU_1720	Eukaryota	Alveolata	Dinophyta	Dinophyceae	Dinophyceae_X	Dinophyceae_XX	Amphidiniella	Amphidiniella_sedentaria	0	0	3	0	0	0	0	0	0	0	0	0	0	0	0	0	0	0	0	0	0	0	0	0	0	0	0	0	0	0	0	0	0	0
OTU_1768	Eukaryota	Alveolata	Ciliophora	Phyllopharyngea	Phyllopharyngea_X	Phyllopharyngea_XX	Phyllopharyngea_XXX	Phyllopharyngea_XXX_sp.	0	0	0	0	0	0	0	0	0	0	0	0	0	2	0	0	0	0	0	0	0	0	0	0	0	0	0	0	0	0	0	0	0	0
OTU_1771	Eukaryota	Alveolata	Ciliophora	Phyllopharyngea	Phyllopharyngea_X	Phyllopharyngea_XX	Phyllopharyngea_XXX	Phyllopharyngea_XXX_sp.	0	0	0	0	0	0	0	0	0	2	0	0	0	0	0	0	0	0	0	0	0	0	0	0	0	0	0	0	0	0	0	0	0	0
OTU_1776	Eukaryota	Alveolata	Apicomplexa	Apicomplexa_X	Gregarines	Gregarines_X	Selenidium	Selenidium_sp.	0	0	0	0	2	0	0	0	0	0	0	0	0	0	0	0	0	0	0	0	0	0	0	0	0	0	0	0	0	0	0	0	0	0
OTU_1778	Eukaryota	Alveolata	Dinophyta	Dinophyceae	Dinophyceae_X	Dinophyceae_XX	Alexandrium	Multi-affiliation	0	0	0	0	0	0	0	0	0	0	0	0	0	0	0	0	0	0	0	0	0	0	0	4	0	0	0	0	0	0	0	0	0	0
OTU_1782	Eukaryota	Alveolata	Ciliophora	Oligohymenophorea	Mobilida	Trichodinidae	Trichodina	Trichodina_ruditapicis	0	0	0	0	0	0	0	0	0	0	0	3	0	0	0	0	0	0	0	0	0	0	0	0	0	0	0	0	0	0	0	0	0	0
OTU_1783	Eukaryota	Alveolata	Ciliophora	Oligohymenophorea	Mobilida	Trichodinidae	Trichodina	Trichodina_ruditapicis	0	0	0	0	0	0	0	0	0	0	0	2	0	0	0	0	0	0	0	0	0	0	0	0	0	0	0	0	0	0	0	0	0	0
OTU_1784	Eukaryota	Alveolata	Ciliophora	Oligohymenophorea	Mobilida	Trichodinidae	Trichodina	Trichodina_ruditapicis	2	0	0	0	0	0	0	0	0	0	0	0	0	0	0	0	0	0	0	0	0	0	0	0	0	0	0	0	0	0	0	0	0	0
OTU_1814	Eukaryota	Alveolata	Dinophyta	Dinophyceae	Suessiales	Suessiales_X	Woloszynskia	Woloszynskia_sp._strain1	0	0	0	0	0	0	0	0	0	0	0	0	0	0	0	0	0	0	0	0	0	0	0	0	0	2	0	0	0	0	0	0	0	0
OTU_1818	Eukaryota	Stramenopiles	Stramenopiles_X	Labyrinthulea	Thraustochytriales	Thraustochytriaceae	Thraustochytriaceae_X	Thraustochytriaceae_X_sp.	0	0	0	0	0	0	0	0	0	0	0	0	0	0	3	0	0	0	0	0	0	0	0	0	0	0	0	0	0	0	0	0	0	0
OTU_1819	Eukaryota	Alveolata	Apicomplexa	Apicomplexa_X	Novel-Apicomplexa-Class-2	Novel-Apicomplexa-Class-2_X	Novel-Apicomplexa-Class-2_XX	Novel-Apicomplexa-Class-2_XX_sp.	4	0	0	0	0	0	0	0	0	0	0	0	0	0	0	0	0	0	0	0	0	0	0	0	0	0	0	0	0	0	0	0	0	0
OTU_1826	Eukaryota	Alveolata	Apicomplexa	Apicomplexa_X	Gregarines	Gregarines_X	Gregarinidae	Gregarinidae_sp.	0	0	0	0	0	0	0	0	0	0	0	0	0	0	0	4	0	0	0	0	0	0	0	0	0	0	0	0	0	0	0	0	0	0
OTU_1841	Eukaryota	Stramenopiles	Ochrophyta	Bacillariophyta	Bacillariophyta_X	Polar-centric-Mediophyceae	Cyclotella	Multi-affiliation	2	0	0	0	0	0	0	0	0	0	0	0	0	0	0	0	0	0	0	0	0	0	0	0	0	0	0	0	0	0	0	0	0	0
OTU_1846	Eukaryota	Stramenopiles	Stramenopiles_X	Labyrinthulea	Thraustochytriales	Thraustochytriaceae	Thraustochytrium	Thraustochytrium_sp.	0	0	0	0	0	0	0	0	0	0	0	0	0	0	0	0	0	0	0	0	0	0	0	0	0	0	3	0	0	0	0	0	0	0
OTU_1848	Eukaryota	Alveolata	Ciliophora	Oligohymenophorea	Scuticociliatia	Cinetochilidae	Cinetochilum	Cinetochilum_ovale	0	0	0	0	0	0	0	0	0	0	0	0	0	0	0	0	0	0	0	0	0	0	2	0	0	0	0	0	0	0	0	0	0	0
OTU_1849	Eukaryota	Alveolata	Ciliophora	Oligohymenophorea	Sessilida	Vorticellidae	Vorticella	Vorticella_convallaria	0	0	2	0	0	0	0	0	0	0	0	0	0	0	0	0	0	0	0	0	0	0	0	0	0	0	0	0	0	0	0	0	0	0
OTU_1853	Eukaryota	Alveolata	Dinophyta	Dinophyceae	Suessiales	Suessiales_X	Suessiales_XX	Suessiales_XX_sp.	0	0	0	0	0	0	0	0	0	0	0	0	2	0	0	0	0	0	0	0	0	0	0	0	0	0	0	0	0	0	0	0	0	0
OTU_1857	Eukaryota	Alveolata	Apicomplexa	Apicomplexa_X	Gregarines	Gregarines_X	Lecudina	Lecudina_tuzetae	0	0	0	0	0	0	0	0	0	0	0	0	0	0	0	0	0	0	0	0	0	0	0	0	2	0	0	0	0	0	0	0	0	0
OTU_1864	Eukaryota	Alveolata	Ciliophora	Colpodea	Colpodida	Colpodidae	Colpoda	Multi-affiliation	0	0	0	0	0	0	0	0	0	0	0	0	0	0	0	0	0	0	0	0	0	0	2	0	0	0	0	0	0	0	0	0	0	0
OTU_1872	Eukaryota	Alveolata	Ciliophora	Spirotrichea	Euplotia	Uronychiidae	Diophrys	Multi-affiliation	0	0	0	0	0	0	0	0	0	0	0	0	0	0	0	0	0	0	0	0	0	0	0	3	0	0	0	0	0	0	0	0	0	0
OTU_1873	Eukaryota	Stramenopiles	Ochrophyta	Bacillariophyta	Bacillariophyta_X	Raphid-pennate	Multi-affiliation	Multi-affiliation	0	0	0	0	0	0	0	0	0	0	0	0	0	0	0	0	0	0	0	0	0	0	0	3	0	0	0	0	0	0	0	0	0	0
OTU_1874	Eukaryota	Alveolata	Dinophyta	Dinophyceae	Dinophyceae_X	Dinophyceae_XX	Dinophyceae_XXX	Dinophyceae_XXX_sp.	2	0	0	0	0	0	0	0	0	0	0	0	0	0	0	0	0	0	0	0	0	0	0	0	0	0	0	0	0	0	0	0	0	0
OTU_1880	Eukaryota	Archaeplastida	Rhodophyta	Florideophyceae	Ceramiales	Ceramiaceae	Pterothamnion	Multi-affiliation	0	0	0	0	0	0	0	0	0	0	0	0	0	0	0	0	0	0	3	0	0	0	0	0	0	0	1	0	0	0	0	0	0	0
OTU_1887	Eukaryota	Alveolata	Apicomplexa	Apicomplexa_X	Colpodellidae	Colpodellidae_X	Colpodellidae_XX	Colpodellidae_XX_sp.	2	0	0	0	0	0	0	0	0	0	0	0	0	0	0	0	0	0	0	0	0	0	0	0	0	0	0	0	0	0	0	0	0	0
OTU_1890	Eukaryota	Opisthokonta	Choanoflagellida	Choanoflagellatea	Craspedida	Monosigidae_Group_M	Salpingoeca_M	Salpingoeca_urceolata	0	0	0	0	0	0	0	0	0	0	0	0	0	0	0	0	0	0	0	0	0	0	0	0	0	0	0	2	0	0	0	0	0	0
OTU_1897	Eukaryota	Alveolata	Dinophyta	Dinophyceae	Multi-affiliation	Multi-affiliation	Multi-affiliation	Multi-affiliation	0	0	0	0	0	0	0	0	0	0	0	0	0	0	0	0	0	2	0	0	0	0	0	0	0	0	0	0	0	0	0	0	0	0
OTU_1898	Eukaryota	Archaeplastida	Chlorophyta	Trebouxiophyceae	Chlorellales	Chlorellales_X	Multi-affiliation	Multi-affiliation	0	0	0	0	0	0	0	0	0	0	0	0	0	0	0	0	0	0	0	0	0	0	0	2	0	0	0	0	0	0	0	0	0	0
OTU_1900	Eukaryota	Archaeplastida	Chlorophyta	Chlorophyceae	Sphaeropleales	Sphaeropleales_X	Mychonastes	Multi-affiliation	0	0	0	0	0	0	0	0	0	0	0	0	0	0	1	0	0	0	0	0	0	0	0	1	0	0	0	0	0	0	0	0	0	0
OTU_1901	Eukaryota	Opisthokonta	Mesomycetozoa	Ichthyosporea	Ichthyosphonida	Pseudoperkinsidae	Pseudoperkinsus	Pseudoperkinsus_tapetis	0	0	0	0	0	0	0	0	0	0	0	0	0	0	0	2	0	0	0	0	0	0	0	0	0	0	0	0	0	0	0	0	0	0
OTU_1903	Eukaryota	Alveolata	Dinophyta	Dinophyceae	Dinophyceae_X	Dinophyceae_XX	Dinophyceae_XXX	Dinophyceae_XXX_sp.	0	0	0	0	0	0	0	0	0	0	0	0	0	0	0	0	0	0	0	0	0	0	0	0	0	0	2	0	0	0	0	0	0	0
OTU_1914	Eukaryota	Rhizaria	Cercozoa	Filosa-Imbricatea	Filosa-Imbricatea_X	Novel-clade-2	Novel-clade-2_X	Multi-affiliation	0	0	0	0	2	0	0	0	0	0	0	0	0	0	0	0	0	0	0	0	0	0	0	0	0	0	0	0	0	0	0	0	0	0
OTU_1916	Eukaryota	Archaeplastida	Chlorophyta	Ulvophyceae	Ulvales-relatives	Ulvales-relatives_X	Ulva	Multi-affiliation	0	0	0	0	0	0	0	0	0	0	0	0	0	0	0	0	0	0	0	0	0	0	0	4	0	0	0	0	0	0	0	0	0	0
OTU_1922	Eukaryota	Alveolata	Dinophyta	Dinophyceae	Dinophyceae_X	Ostreopsidaceae	Coolia	Coolia_monotis	0	0	0	0	0	0	0	0	0	0	0	0	0	0	0	0	0	0	0	0	0	0	0	0	0	0	0	2	0	0	0	0	0	0
OTU_1924	Eukaryota	Alveolata	Dinophyta	Dinophyceae	Dinophyceae_X	Ostreopsidaceae	Coolia	Coolia_monotis	0	0	0	0	0	0	0	0	0	0	0	0	0	0	0	0	0	0	0	0	0	0	0	0	0	0	0	0	0	2	0	0	0	0
OTU_1928	Eukaryota	Alveolata	Dinophyta	Dinophyceae	Suessiales	Suessiales_X	Multi-affiliation	Multi-affiliation	0	0	0	0	0	0	0	0	0	0	0	0	0	0	0	0	0	0	0	0	0	0	0	0	0	0	0	0	0	0	0	4	0	0
OTU_1936	Eukaryota	Stramenopiles	Ochrophyta	Bacillariophyta	Bacillariophyta_X	Raphid-pennate	Raphid-pennate_X	Raphid-pennate_X_sp.	0	0	0	0	0	0	0	0	0	0	0	0	0	0	0	0	0	0	0	0	0	0	0	2	0	0	0	0	0	0	0	0	0	0
OTU_1945	Eukaryota	Alveolata	Dinophyta	Syndiniales	Dino-Group-II	Dino-Group-II-Clade-4	Dino-Group-II-Clade-4_X	Dino-Group-II-Clade-4_X_sp.	0	0	0	0	0	0	0	0	0	0	0	0	0	0	0	0	0	0	0	0	0	0	0	0	0	0	0	0	0	0	2	0	0	0
OTU_1951	Eukaryota	Alveolata	Dinophyta	Dinophyceae	Dinophyceae_X	Dinophyceae_XX	Alexandrium	Multi-affiliation	0	0	0	0	0	0	2	0	0	0	0	0	0	0	0	0	0	0	0	0	0	0	0	0	0	0	0	0	0	0	0	0	0	0
OTU_1953	Eukaryota	Alveolata	Dinophyta	Dinophyceae	Dinophyceae_X	Dinophyceae_XX	Dinophyceae_XXX	Dinophyceae_XXX_sp.	0	0	0	0	0	0	0	0	0	0	0	0	0	0	0	0	0	0	0	0	0	0	0	0	0	0	0	0	0	0	0	0	2	0
OTU_1954	Eukaryota	Alveolata	Dinophyta	Dinophyceae	Dinophyceae_X	Dinophyceae_XX	Gymnodinium	Gymnodinium_dorsalisulcum	0	0	0	0	0	0	0	2	0	0	0	0	0	0	0	0	0	0	0	0	0	0	0	0	0	0	0	0	0	0	0	0	0	0
OTU_1971	Eukaryota	Multi-affiliation	Multi-affiliation	Multi-affiliation	Multi-affiliation	Multi-affiliation	Multi-affiliation	Multi-affiliation	0	0	0	0	0	0	0	0	0	0	0	0	0	0	0	0	0	0	2	0	0	0	0	0	0	0	0	0	0	0	0	0	0	0
OTU_1976	Eukaryota	Alveolata	Dinophyta	Dinophyceae	Suessiales	Suessiales_X	Multi-affiliation	Multi-affiliation	0	0	0	2	0	0	0	0	0	0	0	0	0	0	0	0	0	0	0	0	0	0	0	0	0	0	0	0	0	0	0	0	0	0
OTU_1985	Eukaryota	Alveolata	Dinophyta	Dinophyceae	Dinophyceae_X	Dinophyceae_XX	Alexandrium	Multi-affiliation	0	0	0	0	0	0	0	0	0	0	0	0	0	0	2	0	0	0	0	0	0	0	0	0	0	0	0	0	0	0	0	0	0	0
OTU_1987	Eukaryota	Alveolata	Dinophyta	Dinophyceae	Suessiales	Suessiales_X	Multi-affiliation	Multi-affiliation	0	0	0	0	0	0	0	0	3	0	0	0	0	0	0	0	0	0	0	0	0	0	0	0	0	0	0	0	0	0	0	0	0	0
OTU_1988	Eukaryota	Alveolata	Dinophyta	Dinophyceae	Dinophyceae_X	Dinophyceae_XX	Gymnodinium	Gymnodinium_dorsalisulcum	0	0	0	0	0	0	0	0	0	0	0	0	0	0	0	0	0	0	0	0	0	0	0	0	0	0	0	0	0	0	0	4	0	0
OTU_1989	Eukaryota	Alveolata	Dinophyta	Dinophyceae	Dinophyceae_X	Dinophyceae_XX	Gymnodinium	Gymnodinium_dorsalisulcum	0	0	0	0	0	0	0	0	0	0	0	0	0	0	0	0	0	0	0	0	0	0	0	0	0	0	0	0	0	0	0	0	2	0
OTU_1992	Eukaryota	Alveolata	Dinophyta	Dinophyceae	Dinophyceae_X	Dinophyceae_XX	Dinophyceae_XXX	Dinophyceae_XXX_sp.	0	0	0	0	0	0	0	0	0	0	0	0	0	0	0	0	0	0	0	0	0	0	0	0	0	0	0	0	0	0	0	0	0	7
OTU_1996	Eukaryota	Multi-affiliation	Multi-affiliation	Multi-affiliation	Multi-affiliation	Multi-affiliation	Multi-affiliation	Multi-affiliation	0	0	2	0	0	0	0	0	0	0	0	0	0	0	0	0	0	0	0	0	0	0	0	0	0	0	0	0	0	0	0	0	0	0
OTU_1997	Eukaryota	Alveolata	Dinophyta	Dinophyceae	Multi-affiliation	Multi-affiliation	Multi-affiliation	Multi-affiliation	0	0	0	0	0	3	0	0	0	0	0	0	0	0	0	0	0	0	0	0	0	0	0	0	0	0	0	0	0	1	0	0	0	0
OTU_1998	Eukaryota	Alveolata	Dinophyta	Dinophyceae	Suessiales	Suessiales_X	Suessiales_XX	Suessiales_XX_sp.	0	0	0	0	0	0	0	0	0	0	0	0	0	0	0	0	0	0	0	0	0	0	0	0	0	0	0	2	0	0	0	0	0	0
OTU_1999	Eukaryota	Alveolata	Dinophyta	Dinophyceae	Suessiales	Suessiales_X	Woloszynskia	Woloszynskia_sp._strain1	0	0	0	0	0	0	0	0	0	0	0	0	0	0	0	0	0	0	0	0	0	0	0	0	0	0	0	0	0	2	0	0	0	0
OTU_2000	Eukaryota	Multi-affiliation	Multi-affiliation	Multi-affiliation	Multi-affiliation	Multi-affiliation	Multi-affiliation	Multi-affiliation	0	0	0	0	0	0	0	0	0	0	0	0	0	0	0	0	0	0	0	0	2	0	0	0	0	0	0	0	0	1	0	0	0	0
OTU_2001	Eukaryota	Alveolata	Dinophyta	Syndiniales	Dino-Group-I	Dino-Group-I-Clade-1	Dino-Group-I-Clade-1_X	Multi-affiliation	0	0	0	0	0	0	0	0	0	0	0	0	0	0	0	0	0	0	2	0	0	0	0	0	0	0	0	0	0	0	0	0	0	0
OTU_2002	Eukaryota	Stramenopiles	Ochrophyta	Bacillariophyta	Bacillariophyta_X	Raphid-pennate	Navicula	Multi-affiliation	0	0	0	0	0	0	0	0	0	0	0	0	0	0	0	0	0	0	0	0	0	0	2	0	0	0	0	0	0	0	0	0	0	0
OTU_2006	Eukaryota	Stramenopiles	Ochrophyta	Bacillariophyta	Bacillariophyta_X	Raphid-pennate	Multi-affiliation	Multi-affiliation	0	0	0	0	0	0	2	0	0	0	0	0	0	0	0	0	0	0	0	0	0	0	0	0	0	0	0	0	0	0	0	0	0	0
OTU_2007	Eukaryota	Alveolata	Dinophyta	Dinophyceae	Dinophyceae_X	Dinophyceae_XX	Gymnodinium	Gymnodinium_dorsalisulcum	0	0	0	0	0	0	0	0	0	0	0	0	0	0	0	0	0	0	0	0	0	0	0	0	0	0	0	0	0	0	2	0	0	0
OTU_2012	Eukaryota	Stramenopiles	Ochrophyta	Bacillariophyta	Bacillariophyta_X	Raphid-pennate	Raphid-pennate_X	Raphid-pennate_X_sp.	0	0	0	0	0	0	0	0	0	3	0	0	0	0	0	0	0	0	0	0	0	0	0	0	0	0	0	0	0	0	0	0	0	0
OTU_2013	Eukaryota	Stramenopiles	Ochrophyta	Bacillariophyta	Bacillariophyta_X	Raphid-pennate	Nitzschia	Nitzschia_apiculata	0	0	0	0	0	0	0	0	0	0	0	0	0	0	2	0	0	0	0	0	0	0	1	0	0	0	0	0	0	0	0	0	0	0
OTU_2015	Eukaryota	Alveolata	Dinophyta	Dinophyceae	Dinophyceae_X	Dinophyceae_XX	Dinophyceae_XXX	Dinophyceae_XXX_sp.	0	2	0	0	0	0	0	0	0	0	0	0	0	0	0	0	0	0	0	0	0	0	0	0	1	0	0	0	2	1	0	0	0	0
OTU_2016	Eukaryota	Alveolata	Dinophyta	Dinophyceae	Suessiales	Suessiales_X	Multi-affiliation	Multi-affiliation	0	0	0	0	0	0	0	0	0	0	0	0	0	0	0	0	2	0	0	0	0	0	0	0	0	0	0	0	0	0	0	0	0	0
OTU_2017	Eukaryota	Alveolata	Dinophyta	Dinophyceae	Suessiales	Suessiales_X	Woloszynskia	Woloszynskia_sp._strain1	0	0	0	0	0	0	1	0	0	0	0	0	1	0	0	0	1	0	0	0	0	0	0	0	0	0	0	0	0	0	0	0	0	0
OTU_2018	Eukaryota	Alveolata	Dinophyta	Dinophyceae	Suessiales	Suessiales_X	Woloszynskia	Woloszynskia_sp._strain1	0	0	0	0	0	0	0	0	0	0	0	0	0	0	0	0	0	0	0	0	0	0	0	0	0	0	0	0	2	0	0	0	0	0
OTU_2019	Eukaryota	Alveolata	Dinophyta	Dinophyceae	Suessiales	Suessiales_X	Woloszynskia	Woloszynskia_sp._strain1	0	0	0	0	0	0	0	0	0	0	0	0	0	0	0	0	0	0	0	0	0	0	0	0	0	2	0	0	0	0	0	0	0	0
OTU_2020	Eukaryota	Alveolata	Dinophyta	Dinophyceae	Suessiales	Suessiales_X	Woloszynskia	Woloszynskia_halophila	0	0	0	0	0	0	0	0	0	0	0	0	0	0	0	0	0	0	0	0	0	0	0	0	2	0	0	0	0	0	0	0	0	0
OTU_2021	Eukaryota	Alveolata	Dinophyta	Dinophyceae	Suessiales	Suessiales_X	Woloszynskia	Woloszynskia_sp._strain1	0	0	0	0	0	0	0	0	0	0	0	0	0	0	0	0	0	0	0	0	0	2	0	0	0	0	0	0	0	0	0	0	0	0
OTU_2022	Eukaryota	Alveolata	Dinophyta	Dinophyceae	Dinophyceae_X	Dinophyceae_XX	Gymnodinium	Gymnodinium_dorsalisulcum	0	0	0	0	0	0	0	0	0	0	0	0	0	0	0	0	0	0	0	0	0	0	0	0	0	0	0	0	0	3	0	0	0	0
OTU_2023	Eukaryota	Alveolata	Dinophyta	Dinophyceae	Dinophyceae_X	Dinophyceae_XX	Dinophyceae_XXX	Dinophyceae_XXX_sp.	0	0	0	0	0	0	0	0	0	0	0	0	0	0	0	0	0	0	0	0	0	2	0	0	0	0	0	0	0	0	0	0	0	0
OTU_2024	Eukaryota	Alveolata	Dinophyta	Dinophyceae	Suessiales	Suessiales_X	Woloszynskia	Woloszynskia_sp._strain1	0	0	0	0	0	0	0	0	0	2	0	0	0	0	0	0	0	0	0	0	0	0	0	0	0	0	0	0	0	0	0	0	0	0
OTU_2025	Eukaryota	Alveolata	Dinophyta	Dinophyceae	Suessiales	Suessiales_X	Woloszynskia	Woloszynskia_sp._strain1	0	0	0	0	0	0	0	0	0	0	0	0	0	0	0	0	0	0	0	0	0	0	0	0	0	0	0	0	0	0	2	0	0	0
OTU_2034	Eukaryota	Alveolata	Dinophyta	Dinophyceae	Suessiales	Suessiales_X	Suessiales_XX	Suessiales_XX_sp.	0	0	0	0	0	0	0	2	0	0	0	0	0	0	0	0	0	0	0	0	0	0	0	0	0	0	0	0	0	0	0	0	0	0
OTU_2041	Eukaryota	Alveolata	Dinophyta	Dinophyceae	Dinophyceae_X	Dinophyceae_XX	Multi-affiliation	Multi-affiliation	0	0	0	0	0	0	0	0	0	0	0	0	0	0	0	0	0	0	0	0	0	0	0	2	0	0	0	0	0	0	0	0	0	0
OTU_2042	Eukaryota	Alveolata	Dinophyta	Dinophyceae	Dinophyceae_X	Dinophyceae_XX	Multi-affiliation	Multi-affiliation	0	0	0	0	0	0	0	0	0	0	0	0	0	0	0	0	0	0	0	0	0	0	0	0	2	0	0	0	0	0	0	0	0	0
OTU_2055	Eukaryota	Alveolata	Dinophyta	Dinophyceae	Suessiales	Suessiales_X	Woloszynskia	Woloszynskia_sp.	0	0	0	0	0	0	0	0	0	0	0	0	0	0	0	0	0	0	0	0	2	0	0	0	0	0	0	0	0	0	0	0	0	0
OTU_2059	Eukaryota	Multi-affiliation	Multi-affiliation	Multi-affiliation	Multi-affiliation	Multi-affiliation	Multi-affiliation	Multi-affiliation	0	2	0	0	0	0	0	0	0	0	0	0	0	0	0	0	0	0	0	0	0	0	0	0	0	0	0	0	0	0	0	0	0	0
OTU_2061	Eukaryota	Multi-affiliation	Multi-affiliation	Multi-affiliation	Multi-affiliation	Multi-affiliation	Multi-affiliation	Multi-affiliation	0	0	0	0	0	0	0	0	0	0	0	0	0	0	0	0	0	0	0	0	2	0	0	0	0	0	0	0	0	0	0	0	0	0
OTU_2067	Eukaryota	Alveolata	Dinophyta	Dinophyceae	Dinophyceae_X	Dinophyceae_XX	Multi-affiliation	Multi-affiliation	0	0	1	0	0	0	0	0	0	0	0	0	0	0	0	0	0	0	0	0	0	0	0	0	0	0	0	0	2	0	0	0	0	0
OTU_2069	Eukaryota	Multi-affiliation	Multi-affiliation	Multi-affiliation	Multi-affiliation	Multi-affiliation	Multi-affiliation	Multi-affiliation	0	0	0	0	0	0	0	0	0	0	0	0	0	0	0	0	0	0	0	0	2	0	0	0	0	0	0	0	0	0	0	0	0	0
OTU_2072	Eukaryota	Alveolata	Dinophyta	Dinophyceae	Suessiales	Suessiales_X	Woloszynskia	Woloszynskia_sp.	0	0	0	0	0	0	0	0	0	0	0	0	0	0	0	0	0	0	0	0	0	0	0	0	0	0	0	0	0	2	0	0	0	0
OTU_2076	Eukaryota	Alveolata	Dinophyta	Dinophyceae	Dinophyceae_X	Dinophyceae_XX	Dinophyceae_XXX	Dinophyceae_XXX_sp.	0	0	0	0	0	0	0	0	0	0	0	0	0	0	0	0	0	0	0	0	0	0	0	0	0	0	0	0	0	0	2	0	0	0
OTU_2078	Eukaryota	Alveolata	Dinophyta	Dinophyceae	Dinophyceae_X	Dinophyceae_XX	Dinophyceae_XXX	Dinophyceae_XXX_sp.	0	0	0	0	0	0	0	0	0	0	0	0	0	0	0	0	0	0	0	0	0	0	0	0	0	0	0	0	0	2	0	0	0	0
OTU_2079	Eukaryota	Alveolata	Dinophyta	Dinophyceae	Dinophyceae_X	Dinophyceae_XX	Multi-affiliation	Multi-affiliation	0	0	0	0	0	2	0	0	0	0	0	0	0	0	0	0	0	0	0	0	0	0	0	0	0	0	0	0	0	0	0	0	0	0
OTU_2081	Eukaryota	Multi-affiliation	Multi-affiliation	Multi-affiliation	Multi-affiliation	Multi-affiliation	Multi-affiliation	Multi-affiliation	0	0	0	0	0	0	0	0	0	0	0	0	0	0	0	0	0	0	2	0	0	0	0	0	0	0	0	0	0	0	0	0	0	0
OTU_2083	Eukaryota	Alveolata	Dinophyta	Dinophyceae	Dinophyceae_X	Dinophyceae_XX	Chytriodinium	Chytriodinium_roseum	0	0	0	0	0	0	0	0	0	0	0	0	0	0	0	0	0	0	0	0	0	3	0	0	0	0	0	0	0	0	0	0	0	0
OTU_2089	Eukaryota	Alveolata	Dinophyta	Dinophyceae	Dinophyceae_X	Dinophyceae_XX	Gymnodinium	Gymnodinium_dorsalisulcum	0	3	0	0	0	0	0	0	0	0	0	0	0	0	0	0	0	0	0	0	0	0	0	0	0	0	0	0	0	0	0	0	0	0
OTU_2095	Eukaryota	Alveolata	Dinophyta	Dinophyceae	Dinophyceae_X	Dinophyceae_XX	Gymnodinium	Gymnodinium_dorsalisulcum	0	0	0	0	0	0	0	0	0	0	0	0	2	0	0	0	0	0	0	0	0	0	0	0	0	0	0	0	0	0	0	0	0	0
OTU_2097	Eukaryota	Alveolata	Dinophyta	Dinophyceae	Dinophyceae_X	Dinophyceae_XX	Gymnodinium	Gymnodinium_dorsalisulcum	0	0	0	0	0	0	0	0	0	0	0	0	0	0	0	0	0	0	0	0	0	0	0	0	0	0	0	0	0	2	0	0	0	0
OTU_2100	Eukaryota	Alveolata	Dinophyta	Dinophyceae	Dinophyceae_X	Dinophyceae_XX	Gymnodinium	Gymnodinium_dorsalisulcum	0	0	0	0	0	0	0	0	0	0	0	0	0	0	0	0	0	0	0	0	0	0	0	0	0	0	0	0	0	0	0	0	0	2
OTU_2101	Eukaryota	Alveolata	Dinophyta	Dinophyceae	Suessiales	Suessiales_X	Woloszynskia	Woloszynskia_sp._strain1	0	0	0	0	0	0	0	2	0	0	0	0	0	0	0	0	0	0	0	0	0	0	0	0	0	0	0	0	0	0	0	0	0	0
OTU_2104	Eukaryota	Alveolata	Dinophyta	Dinophyceae	Suessiales	Suessiales_X	Multi-affiliation	Multi-affiliation	0	0	0	0	0	0	0	2	0	0	0	0	0	0	0	0	0	0	0	0	0	0	0	0	0	0	0	0	0	0	0	0	0	0
OTU_2105	Eukaryota	Alveolata	Dinophyta	Dinophyceae	Suessiales	Suessiales_X	Suessiales_XX	Suessiales_XX_sp.	0	0	0	0	0	0	0	0	0	0	0	0	0	0	0	0	0	0	0	0	0	0	0	0	0	0	0	0	0	0	2	0	0	0
OTU_2107	Eukaryota	Alveolata	Dinophyta	Dinophyceae	Multi-affiliation	Multi-affiliation	Multi-affiliation	Multi-affiliation	0	0	0	0	0	0	0	0	0	0	0	0	0	0	0	0	0	0	0	0	0	2	0	0	0	0	0	0	0	0	0	0	0	0
OTU_2108	Eukaryota	Alveolata	Dinophyta	Dinophyceae	Suessiales	Suessiales_X	Woloszynskia	Woloszynskia_sp._strain1	0	0	0	0	0	0	0	0	0	0	0	0	0	0	0	0	0	0	0	0	0	0	0	0	0	0	0	0	0	0	2	0	0	0
OTU_2109	Eukaryota	Alveolata	Dinophyta	Dinophyceae	Suessiales	Suessiales_X	Woloszynskia	Woloszynskia_sp._strain1	0	2	0	0	0	0	0	0	0	0	0	0	0	0	0	0	0	0	0	0	0	0	0	0	0	0	0	0	0	0	0	0	0	0
OTU_2112	Eukaryota	Alveolata	Dinophyta	Dinophyceae	Suessiales	Suessiales_X	Woloszynskia	Woloszynskia_sp._strain1	0	0	0	0	0	0	0	0	0	0	0	0	0	0	0	0	0	0	0	2	0	0	0	0	0	0	0	0	0	0	0	0	0	0
OTU_2115	Eukaryota	Alveolata	Dinophyta	Dinophyceae	Suessiales	Suessiales_X	Woloszynskia	Woloszynskia_sp._strain1	0	0	0	0	0	0	0	2	0	0	0	0	0	0	0	0	0	0	0	0	0	0	0	0	0	0	0	0	0	0	0	0	0	0
OTU_2116	Eukaryota	Alveolata	Dinophyta	Dinophyceae	Suessiales	Suessiales_X	Woloszynskia	Woloszynskia_sp._strain1	0	0	0	0	0	0	0	0	0	0	2	0	0	0	0	0	0	0	0	0	0	0	0	0	0	0	0	0	0	0	0	0	0	0
OTU_2118	Eukaryota	Alveolata	Dinophyta	Dinophyceae	Multi-affiliation	Multi-affiliation	Multi-affiliation	Multi-affiliation	0	0	0	0	0	0	0	0	0	0	0	0	0	0	0	0	0	0	0	0	0	0	0	0	0	2	0	0	0	0	0	0	0	1
OTU_2119	Eukaryota	Alveolata	Dinophyta	Dinophyceae	Multi-affiliation	Multi-affiliation	Multi-affiliation	Multi-affiliation	0	0	0	0	0	2	0	0	0	0	0	0	0	0	0	0	0	0	0	0	0	0	0	0	0	0	0	0	0	0	0	0	0	0
OTU_2121	Eukaryota	Alveolata	Dinophyta	Dinophyceae	Suessiales	Suessiales_X	Woloszynskia	Woloszynskia_sp._strain1	0	0	0	0	0	1	0	0	0	0	1	0	0	0	0	0	0	1	0	0	0	0	0	0	0	0	0	0	0	0	0	0	0	0
OTU_2123	Eukaryota	Alveolata	Dinophyta	Dinophyceae	Suessiales	Suessiales_X	Woloszynskia	Woloszynskia_sp._strain1	0	0	0	0	0	0	0	0	0	2	0	0	0	0	0	0	0	0	0	0	0	0	0	0	0	0	0	0	0	0	0	0	0	0
OTU_2124	Eukaryota	Alveolata	Dinophyta	Dinophyceae	Suessiales	Suessiales_X	Woloszynskia	Woloszynskia_sp._strain1	0	0	0	0	0	0	0	0	0	0	0	0	0	0	0	0	0	0	0	0	0	0	0	0	0	0	0	0	0	0	0	0	2	0
OTU_2125	Eukaryota	Alveolata	Dinophyta	Dinophyceae	Suessiales	Suessiales_X	Woloszynskia	Woloszynskia_sp._strain1	2	0	0	0	0	0	0	0	0	0	0	0	0	0	0	0	0	0	0	0	0	0	0	0	0	0	0	0	0	0	0	0	0	0
OTU_2132	Eukaryota	Alveolata	Dinophyta	Dinophyceae	Suessiales	Suessiales_X	Woloszynskia	Woloszynskia_sp._strain1	0	0	0	0	0	0	0	0	0	0	0	0	0	0	0	0	0	0	2	0	0	0	0	0	0	0	0	0	0	0	0	0	0	0
OTU_2133	Eukaryota	Alveolata	Dinophyta	Dinophyceae	Suessiales	Suessiales_X	Woloszynskia	Woloszynskia_sp._strain1	0	0	0	0	0	0	0	0	0	0	0	0	0	0	0	0	0	0	0	0	0	0	0	0	0	2	0	0	0	0	0	0	0	0
OTU_2137	Eukaryota	Alveolata	Dinophyta	Dinophyceae	Suessiales	Suessiales_X	Multi-affiliation	Multi-affiliation	0	0	0	0	0	0	0	0	0	0	0	0	0	0	0	0	0	0	0	0	0	0	0	0	0	0	0	0	0	0	2	0	0	0
OTU_2139	Eukaryota	Alveolata	Dinophyta	Dinophyceae	Suessiales	Suessiales_X	Woloszynskia	Woloszynskia_sp._strain1	0	0	0	0	0	0	0	0	0	0	0	0	0	0	0	0	2	0	0	0	0	0	0	0	0	0	0	0	0	0	0	0	0	0
OTU_2141	Eukaryota	Alveolata	Dinophyta	Dinophyceae	Suessiales	Suessiales_X	Suessiales_XX	Suessiales_XX_sp.	0	0	0	0	0	0	0	0	0	0	0	0	0	0	0	0	0	0	0	0	0	0	0	0	0	0	0	0	0	0	0	0	0	2
OTU_2143	Eukaryota	Alveolata	Dinophyta	Dinophyceae	Suessiales	Suessiales_X	Suessiales_XX	Suessiales_XX_sp.	0	0	0	0	0	0	0	0	0	0	0	0	0	0	0	0	0	0	0	0	0	0	0	0	0	0	0	0	0	0	2	0	0	0
OTU_2144	Eukaryota	Alveolata	Dinophyta	Dinophyceae	Dinophyceae_X	Dinophyceae_XX	Multi-affiliation	Multi-affiliation	1	0	0	0	0	0	0	0	0	0	0	0	0	0	0	0	1	0	0	0	0	0	0	0	0	0	0	0	0	0	0	0	0	0
OTU_2145	Eukaryota	Multi-affiliation	Multi-affiliation	Multi-affiliation	Multi-affiliation	Multi-affiliation	Multi-affiliation	Multi-affiliation	0	0	0	0	0	0	0	0	0	0	0	0	0	0	0	0	2	0	0	0	0	0	0	0	0	0	0	0	0	0	0	0	0	0
OTU_2146	Eukaryota	Multi-affiliation	Multi-affiliation	Multi-affiliation	Multi-affiliation	Multi-affiliation	Multi-affiliation	Multi-affiliation	0	0	0	0	0	0	0	0	0	0	0	0	0	0	0	0	2	0	0	0	0	0	0	0	0	0	0	0	0	0	0	0	0	0
OTU_2147	Eukaryota	Multi-affiliation	Multi-affiliation	Multi-affiliation	Multi-affiliation	Multi-affiliation	Multi-affiliation	Multi-affiliation	0	0	0	0	0	0	0	0	0	0	0	0	0	0	0	0	0	0	0	0	0	0	0	0	0	3	0	0	0	0	0	0	0	0
OTU_2148	Eukaryota	Alveolata	Dinophyta	Dinophyceae	Suessiales	Suessiales_X	Woloszynskia	Woloszynskia_cincta	0	0	0	0	0	0	0	0	0	0	0	0	0	0	0	0	0	0	0	0	0	0	0	0	0	0	0	0	0	0	0	0	2	0
OTU_2151	Eukaryota	Alveolata	Dinophyta	Dinophyceae	Suessiales	Suessiales_X	Suessiales_XX	Suessiales_XX_sp.	0	0	3	0	0	0	0	0	0	0	0	0	0	0	0	0	0	0	0	0	0	0	0	0	0	0	0	0	0	0	0	0	0	0
OTU_2156	Eukaryota	Alveolata	Dinophyta	Dinophyceae	Suessiales	Suessiales_X	Woloszynskia	Woloszynskia_sp._strain1	0	0	0	0	0	0	0	0	0	2	0	0	0	0	0	0	0	0	0	0	0	0	0	0	0	0	0	0	0	0	0	0	0	0
OTU_2166	Eukaryota	Alveolata	Dinophyta	Dinophyceae	Suessiales	Suessiales_X	Woloszynskia	Woloszynskia_sp._strain1	2	0	0	0	0	0	0	0	0	0	0	0	0	0	0	0	0	0	0	0	0	0	0	0	0	0	0	0	0	0	0	0	0	0
OTU_2167	Eukaryota	Alveolata	Dinophyta	Dinophyceae	Suessiales	Suessiales_X	Woloszynskia	Woloszynskia_sp._strain1	0	0	0	0	0	0	0	0	0	0	0	0	0	0	0	0	3	0	0	0	0	0	0	0	0	0	0	0	0	0	0	0	0	0
OTU_2168	Eukaryota	Alveolata	Dinophyta	Dinophyceae	Suessiales	Suessiales_X	Suessiales_XX	Suessiales_XX_sp.	0	0	0	0	0	0	0	0	0	0	0	0	0	0	0	0	0	0	0	0	0	0	0	0	0	0	0	2	0	0	0	0	0	0
OTU_2171	Eukaryota	Alveolata	Dinophyta	Dinophyceae	Suessiales	Suessiales_X	Woloszynskia	Woloszynskia_sp._strain1	0	0	0	0	0	0	0	2	0	0	0	0	0	0	0	0	0	0	0	0	0	0	0	0	0	0	0	0	0	0	0	0	0	0
OTU_2175	Eukaryota	Alveolata	Dinophyta	Dinophyceae	Dinophyceae_X	Dinophyceae_XX	Dinophyceae_XXX	Dinophyceae_XXX_sp.	0	0	0	0	0	0	0	0	0	0	0	0	0	0	0	0	0	0	0	0	0	0	0	0	0	0	0	0	0	2	0	0	0	0
OTU_2179	Eukaryota	Alveolata	Dinophyta	Dinophyceae	Dinophyceae_X	Dinophyceae_XX	Gymnodinium	Gymnodinium_dorsalisulcum	0	0	0	0	0	0	0	0	0	0	0	0	0	0	0	0	0	0	0	0	0	0	0	0	0	0	0	0	0	2	0	0	0	0
OTU_2182	Eukaryota	Alveolata	Dinophyta	Dinophyceae	Suessiales	Suessiales_X	Woloszynskia	Woloszynskia_sp._strain1	0	0	0	0	0	0	0	0	0	0	0	0	1	0	0	0	0	0	0	0	0	0	0	0	0	0	0	0	0	0	0	0	0	0
OTU_2183	Eukaryota	Alveolata	Dinophyta	Dinophyceae	Dinophyceae_X	Dinophyceae_XX	Multi-affiliation	Multi-affiliation	0	0	0	0	0	0	0	0	0	0	0	0	0	0	0	0	0	0	0	0	0	0	0	0	2	0	0	0	0	0	0	0	0	0
OTU_2189	Eukaryota	Alveolata	Dinophyta	Dinophyceae	Suessiales	Suessiales_X	Woloszynskia	Woloszynskia_sp._strain1	2	0	0	0	0	0	0	0	0	0	0	0	0	0	0	0	0	0	0	0	0	0	0	0	0	0	0	0	0	0	0	0	0	0
OTU_2190	Eukaryota	Alveolata	Dinophyta	Dinophyceae	Suessiales	Suessiales_X	Woloszynskia	Woloszynskia_sp._strain1	0	1	0	0	0	0	0	0	0	0	0	1	0	0	0	0	0	0	0	0	0	0	0	0	0	0	0	0	0	0	0	0	0	0
OTU_2195	Eukaryota	Alveolata	Dinophyta	Dinophyceae	Suessiales	Suessiales_X	Pelagodinium	Multi-affiliation	0	0	0	0	0	0	0	0	0	0	2	0	0	0	0	0	0	0	0	0	0	0	0	0	0	0	0	0	0	0	0	0	0	0
OTU_2197	Eukaryota	Alveolata	Dinophyta	Dinophyceae	Multi-affiliation	Multi-affiliation	Multi-affiliation	Multi-affiliation	0	0	0	0	0	0	0	0	0	0	0	0	0	0	0	0	0	0	0	0	0	0	0	0	0	0	0	0	0	1	2	0	0	0
OTU_2202	Eukaryota	Alveolata	Dinophyta	Dinophyceae	Dinophyceae_X	Dinophyceae_XX	Dinophyceae_XXX	Dinophyceae_XXX_sp.	0	0	0	0	0	0	0	0	0	0	0	0	3	0	0	0	0	0	0	0	0	0	0	0	0	0	0	0	0	0	0	0	0	0
OTU_2204	Eukaryota	Alveolata	Dinophyta	Dinophyceae	Suessiales	Suessiales_X	Woloszynskia	Woloszynskia_sp._strain1	0	0	0	0	0	0	0	0	0	0	0	0	0	0	0	0	0	0	0	0	0	0	0	0	0	0	0	0	2	0	0	0	0	0
OTU_2210	Eukaryota	Alveolata	Dinophyta	Dinophyceae	Dinophyceae_X	Dinophyceae_XX	Gymnodinium	Gymnodinium_dorsalisulcum	0	2	0	0	0	0	0	0	0	0	0	0	0	0	0	0	0	0	0	0	0	0	0	0	0	0	0	0	0	0	0	0	0	0
OTU_2212	Eukaryota	Stramenopiles	Ochrophyta	Bacillariophyta	Bacillariophyta_X	Araphid-pennate	Licmophora	Licmophora_flabellata	0	0	0	0	0	0	0	0	0	0	0	0	0	0	0	0	0	2	0	0	0	0	0	0	0	0	0	0	0	0	0	0	0	0
OTU_2223	Eukaryota	Stramenopiles	Ochrophyta	Bacillariophyta	Bacillariophyta_X	Polar-centric-Mediophyceae	Thalassiosira	Thalassiosira_sp._strain16	0	0	0	0	0	0	0	0	0	0	0	0	0	0	0	0	2	0	0	0	0	0	0	0	0	0	0	0	0	0	0	0	0	0
OTU_2225	Eukaryota	Alveolata	Dinophyta	Dinophyceae	Suessiales	Suessiales_X	Suessiales_XX	Suessiales_XX_sp.	0	0	0	0	0	0	0	0	0	0	0	0	0	2	0	0	0	0	0	0	0	0	0	0	0	0	0	0	0	0	0	0	0	0
OTU_2226	Eukaryota	Alveolata	Dinophyta	Dinophyceae	Dinophyceae_X	Dinophyceae_XX	Dinophyceae_XXX	Dinophyceae_XXX_sp.	0	0	0	0	0	0	0	0	0	0	0	0	0	0	0	0	0	0	0	0	0	0	0	0	0	0	0	2	0	0	0	0	0	0
OTU_2228	Eukaryota	Alveolata	Dinophyta	Dinophyceae	Multi-affiliation	Multi-affiliation	Multi-affiliation	Multi-affiliation	0	0	0	0	0	0	0	0	0	0	0	0	0	0	0	0	0	0	0	0	0	0	0	0	0	2	0	0	0	0	1	0	0	0
OTU_2232	Eukaryota	Alveolata	Dinophyta	Syndiniales	Dino-Group-II	Dino-Group-II-Clade-32	Dino-Group-II-Clade-32_X	Dino-Group-II-Clade-32_X_sp.	0	0	0	0	0	0	0	0	0	0	0	0	0	0	0	0	0	0	0	0	0	0	0	0	0	0	0	0	2	0	0	0	0	0
OTU_2234	Eukaryota	Stramenopiles	Ochrophyta	Bacillariophyta	Bacillariophyta_X	Araphid-pennate	Tabularia	Multi-affiliation	0	0	0	0	0	2	0	0	0	0	0	0	0	0	0	0	0	0	0	0	0	0	0	0	0	0	0	0	0	0	0	0	0	0
OTU_2244	Eukaryota	Rhizaria	Cercozoa	Filosa-Thecofilosea	Cryomonadida	Protaspa-lineage	Protaspa-lineage_X	Protaspa-lineage_X_sp.	0	0	0	0	0	0	0	0	0	0	0	0	0	0	0	0	0	0	0	0	0	0	2	0	0	0	0	0	0	0	0	0	0	0
OTU_2245	Eukaryota	Stramenopiles	Stramenopiles_X	Bicoecea	Bicoecales	Bicoecaceae	Bicoecaceae_X	Bicoecaceae_X_sp.	0	0	0	0	0	0	0	0	0	0	0	0	0	0	0	0	0	0	0	0	0	0	0	0	0	0	0	0	0	0	0	0	2	0
OTU_2247	Eukaryota	Stramenopiles	Ochrophyta	Bacillariophyta	Bacillariophyta_X	Polar-centric-Mediophyceae	Multi-affiliation	Multi-affiliation	0	0	0	0	0	0	0	0	0	0	0	0	0	0	0	2	0	0	0	0	0	0	0	0	0	0	0	0	0	0	0	0	0	0
OTU_2250	Eukaryota	Stramenopiles	Stramenopiles_X	Labyrinthulea	Labyrinthulales	Labyrinthulaceae	Labyrinthulaceae_X	Labyrinthulaceae_X_sp.	0	0	0	0	0	0	0	0	0	0	0	0	0	0	0	0	0	0	0	0	0	0	0	0	0	0	0	2	0	0	0	0	0	0
OTU_2274	Eukaryota	Alveolata	Apicomplexa	Apicomplexa_X	Coccidia	Coccidia_X	Coccidia_XX	Coccidia_XX_sp.	0	0	0	0	0	0	0	0	0	0	0	0	0	0	0	0	0	0	0	0	0	0	0	2	0	0	0	0	0	0	0	0	0	0
OTU_2469	Eukaryota	Rhizaria	Cercozoa	Filosa-Thecofilosea	Cryomonadida	Protaspa-lineage	Protaspa-lineage_X	Protaspa-lineage_X_sp.	0	0	0	0	0	0	0	0	0	0	0	0	0	0	0	0	0	0	0	0	0	0	0	0	0	2	0	0	0	0	0	0	0	0
OTU_2473	Eukaryota	Rhizaria	Cercozoa	Filosa-Thecofilosea	Ebriida	TAGIRI1-lineage	TAGIRI1-lineage_X	TAGIRI1-lineage_X_sp.	0	0	0	0	0	0	1	0	0	0	0	0	0	0	0	0	1	0	0	0	0	0	0	0	1	0	0	0	0	0	0	0	0	0
OTU_2475	Eukaryota	Stramenopiles	Ochrophyta	Bacillariophyta	Bacillariophyta_X	Raphid-pennate	Raphid-pennate_X	Raphid-pennate_X_sp.	0	0	0	0	0	0	0	0	0	0	0	0	0	0	0	0	0	0	0	0	0	0	2	0	0	0	0	0	0	0	0	0	0	0
OTU_2476	Eukaryota	Rhizaria	Cercozoa	Filosa-Imbricatea	Thaumatomonadida	Thaumatomonadidae	Thaumatomonas	Thaumatomonas_sp._strain1	0	0	0	0	0	0	0	0	0	0	0	0	0	0	0	0	0	0	0	0	0	0	0	3	0	0	0	0	0	0	0	0	0	0
OTU_2478	Eukaryota	Rhizaria	Cercozoa	Filosa-Thecofilosea	Cryomonadida	Protaspa-lineage	Protaspa-lineage_X	Protaspa-lineage_X_sp.	0	0	0	0	0	0	0	0	0	0	0	0	0	0	0	0	0	0	0	0	0	0	0	3	0	0	0	0	0	0	0	0	0	0
OTU_2482	Eukaryota	Stramenopiles	Stramenopiles_X	Oomycota	Oomycota_X	Leptomitales	Leptomitales_X	Leptomitales_X_sp.	0	0	0	0	0	0	0	0	0	0	0	0	0	0	0	0	3	0	0	0	0	0	0	0	0	0	0	0	0	0	0	0	0	0
OTU_2531	Eukaryota	Stramenopiles	Stramenopiles_X	Labyrinthulea	Thraustochytriales	Thraustochytriaceae	Thraustochytriaceae_X	Thraustochytriaceae_X_sp.	0	0	0	0	0	0	0	0	0	0	0	0	0	0	0	0	0	2	0	0	0	0	0	0	0	0	0	0	0	0	0	0	0	0
OTU_2533	Eukaryota	Stramenopiles	Stramenopiles_X	Labyrinthulea	Labyrinthulales	Labyrinthulaceae	Labyrinthulaceae_X	Labyrinthulaceae_X_sp.	0	0	0	0	0	0	0	0	0	0	0	2	0	0	0	0	0	0	0	0	0	0	0	0	0	0	0	0	0	0	0	0	0	0
OTU_2534	Eukaryota	Stramenopiles	Stramenopiles_X	Bicoecea	Anoecales	Caecitellaceae	Caecitellus	Caecitellus_parvulus	0	0	0	2	0	0	0	0	0	0	0	0	0	0	0	0	0	0	0	0	0	0	0	0	0	0	0	0	0	0	0	0	0	0
OTU_2541	Eukaryota	Rhizaria	Cercozoa	Filosa-Granofilosea	Filosa-Granofilosea_X	he2-lineage	he2-lineage_X	he2-lineage_X_sp.	0	0	0	0	0	0	0	0	0	0	0	0	0	0	0	0	0	0	0	0	0	0	2	0	0	0	0	0	0	0	0	0	0	0
OTU_2542	Eukaryota	Rhizaria	Cercozoa	Endomyxa-Phytomyxea	Phagomyxida	Phagomyxidae	Phagomixa	Phagomixa_sp._strain1	0	0	0	0	0	0	0	0	0	0	0	0	0	0	0	0	0	0	0	0	0	0	0	0	0	0	0	0	2	0	0	0	0	0
OTU_2550	Eukaryota	Alveolata	Ciliophora	Phyllopharyngea	Phyllopharyngea_X	Phyllopharyngea_XX	Phyllopharyngea_XXX	Phyllopharyngea_XXX_sp.	0	0	0	0	0	0	0	0	0	0	0	0	0	2	0	0	0	0	0	0	0	0	0	0	0	0	0	0	0	0	0	0	0	0
OTU_2553	Eukaryota	Alveolata	Dinophyta	Dinophyceae	Suessiales	Suessiales_X	Multi-affiliation	Multi-affiliation	0	0	0	0	0	0	0	0	0	0	0	0	0	0	0	0	0	0	0	0	0	0	0	0	0	0	0	0	2	0	0	0	0	0
OTU_2557	Eukaryota	Multi-affiliation	Multi-affiliation	Multi-affiliation	Multi-affiliation	Multi-affiliation	Multi-affiliation	Multi-affiliation	0	0	0	0	2	0	0	0	0	0	0	0	0	0	0	0	0	0	0	0	0	0	0	0	0	0	0	0	0	0	0	0	0	0
OTU_2558	Eukaryota	Alveolata	Ciliophora	Phyllopharyngea	Suctoria	Acinetidae	Acineta	Acineta_tuberosa	0	0	0	0	0	0	0	0	0	0	0	0	0	0	0	0	0	0	0	0	0	0	2	0	0	0	0	0	0	0	0	0	0	0
OTU_2559	Eukaryota	Alveolata	Apicomplexa	Apicomplexa_X	Novel-Apicomplexa-Class-1	Novel-Apicomplexa-Class-1_X	Novel-Apicomplexa-Class-1_XX	Novel-Apicomplexa-Class-1_XX_sp.	0	0	0	0	0	0	0	0	0	0	0	0	0	0	2	0	0	0	0	0	0	0	0	0	0	0	0	0	0	0	0	0	0	0
OTU_2561	Eukaryota	Alveolata	Ciliophora	Oligohymenophorea	Mobilida	Trichodinidae	Trichodina	Trichodina_ruditapicis	0	0	2	0	0	0	0	0	0	0	0	0	0	0	0	0	0	0	0	0	0	0	0	0	0	0	0	0	0	0	0	0	0	0
OTU_2562	Eukaryota	Alveolata	Ciliophora	Oligohymenophorea	Mobilida	Trichodinidae	Trichodina	Trichodina_ruditapicis	0	0	0	0	0	0	0	0	0	0	0	0	0	0	0	0	0	0	0	0	0	0	0	0	0	0	0	0	0	0	0	0	0	2
OTU_2564	Eukaryota	Alveolata	Ciliophora	Oligohymenophorea	Mobilida	Trichodinidae	Trichodina	Trichodina_ruditapicis	0	0	2	0	0	0	0	0	0	0	0	0	0	0	0	0	0	0	0	0	0	0	0	0	0	0	0	0	0	0	0	0	0	0
OTU_2566	Eukaryota	Alveolata	Ciliophora	Oligohymenophorea	Mobilida	Trichodinidae	Trichodina	Trichodina_ruditapicis	0	0	0	0	0	0	0	0	0	0	0	2	0	0	0	0	0	0	0	0	0	0	0	0	0	0	0	0	0	0	0	0	0	0
OTU_2585	Eukaryota	Opisthokonta	Fungi	Ascomycota	Saccharomycotina	Saccharomycetales	Multi-affiliation	Multi-affiliation	0	0	0	0	0	0	0	0	0	0	0	0	0	0	0	0	0	0	0	0	0	0	2	0	0	0	0	0	0	0	0	0	0	0
OTU_2587	Eukaryota	Stramenopiles	Stramenopiles_X	Labyrinthulea	Thraustochytriales	Thraustochytriaceae	Thraustochytriaceae_X	Thraustochytriaceae_X_sp.	0	0	0	0	0	0	0	0	0	0	0	0	0	0	0	0	0	0	0	0	0	0	2	0	0	0	0	0	0	0	0	0	0	0
OTU_2596	Eukaryota	Alveolata	Dinophyta	Dinophyceae	Multi-affiliation	Multi-affiliation	Multi-affiliation	Multi-affiliation	0	0	0	0	2	0	0	0	0	0	0	0	0	0	0	0	0	0	0	0	0	0	0	0	0	0	0	0	0	0	0	0	0	0
OTU_2606	Eukaryota	Alveolata	Dinophyta	Syndiniales	Dino-Group-I	Dino-Group-I-Clade-4	Euduboscquella	Euduboscquella_crenulata	0	0	0	0	0	2	0	0	0	0	0	0	0	0	0	0	0	0	0	0	0	0	0	0	0	0	0	0	0	0	0	0	0	0
OTU_2612	Eukaryota	Alveolata	Dinophyta	Dinophyceae	Dinophyceae_X	Dinophyceae_XX	Pentapharsodinium	Pentapharsodinium_tyrrhenicum	0	0	0	0	0	0	0	0	0	0	0	0	0	0	0	0	0	0	0	0	0	0	2	0	0	0	0	0	0	0	0	0	0	0
OTU_2618	Eukaryota	Alveolata	Ciliophora	Oligohymenophorea	Peritrichia	Zoothamniidae	Zoothamnium	Zoothamnium_duplicatum	0	0	0	0	0	0	0	0	0	0	0	0	0	0	0	0	0	0	0	0	0	0	2	0	0	0	0	0	0	0	0	0	0	0
OTU_2622	Eukaryota	Alveolata	Ciliophora	Oligohymenophorea	Peritrichia	Zoothamniidae	Zoothamnium	Zoothamnium_alternans	0	0	0	0	0	0	0	0	0	0	0	0	0	0	0	0	0	0	0	0	0	0	0	0	0	0	0	0	2	0	0	0	0	0
OTU_2624	Eukaryota	Alveolata	Apicomplexa	Apicomplexa_X	Gregarines	Gregarines_X	Gregarinidae	Gregarinidae_sp.	0	0	0	0	3	0	0	0	0	0	0	0	0	0	0	0	0	0	0	0	0	0	0	0	0	0	0	0	0	0	0	0	0	0
OTU_2627	Eukaryota	Alveolata	Dinophyta	Dinophyceae	Suessiales	Suessiales_X	Suessiales_XX	Suessiales_XX_sp.	0	0	0	0	0	0	0	0	0	0	0	0	0	0	0	0	0	0	0	0	0	0	0	0	0	0	0	0	3	0	0	0	0	0
OTU_2628	Eukaryota	Alveolata	Apicomplexa	Apicomplexa_X	Gregarines	Gregarines_X	Gregarinidae	Gregarinidae_sp.	0	0	0	0	0	0	0	0	0	0	0	0	0	0	0	0	0	0	0	0	0	0	0	0	0	0	0	0	2	0	0	0	0	0
OTU_2629	Eukaryota	Multi-affiliation	Multi-affiliation	Multi-affiliation	Multi-affiliation	Multi-affiliation	Multi-affiliation	Multi-affiliation	0	0	0	0	2	0	0	0	0	0	0	0	0	0	0	0	0	0	0	0	0	0	0	0	0	0	0	0	0	0	0	0	0	0
OTU_2630	Eukaryota	Alveolata	Apicomplexa	Apicomplexa_X	Gregarines	Gregarines_X	Gregarines_XX	Gregarines_XX_sp.	0	0	0	0	0	0	0	0	0	0	0	0	0	0	2	0	0	0	0	0	0	0	0	0	0	0	0	0	0	0	0	0	0	0
OTU_2631	Eukaryota	Alveolata	Dinophyta	Dinophyceae	Multi-affiliation	Multi-affiliation	Multi-affiliation	Multi-affiliation	0	0	0	0	0	0	0	0	0	0	0	0	2	0	0	0	0	0	0	0	0	0	0	0	0	0	0	0	0	0	0	0	0	0
OTU_2632	Eukaryota	Stramenopiles	Stramenopiles_X	Labyrinthulea	Thraustochytriales	Thraustochytriaceae	Thraustochytrium	Thraustochytrium_sp.	0	0	0	0	0	0	0	0	0	0	0	0	0	0	0	0	0	0	0	0	0	0	0	0	0	0	2	0	0	0	0	0	0	0
OTU_2639	Eukaryota	Multi-affiliation	Multi-affiliation	Multi-affiliation	Multi-affiliation	Multi-affiliation	Multi-affiliation	Multi-affiliation	0	0	0	0	0	0	0	0	0	0	0	0	3	0	0	0	0	0	0	0	0	0	0	0	0	0	0	0	0	0	0	0	0	0
OTU_2643	Eukaryota	Opisthokonta	Choanoflagellida	Choanoflagellatea	Acanthoecida	Stephanoecidae_New_Choanos_8	Stephanoecidae_New_Choanos_8_X	Stephanoecidae_New_Choanos_8_X_sp.	0	0	0	0	0	0	0	0	0	0	0	0	0	0	0	0	0	0	0	0	0	0	0	0	3	0	0	0	0	0	0	0	0	0
OTU_2645	Eukaryota	Archaeplastida	Chlorophyta	Ulvophyceae	Ulvales-relatives	Ulvales-relatives_X	Ulva	Ulva_intestinalis	0	0	0	0	0	0	0	0	0	0	0	0	0	0	0	0	0	0	0	0	0	0	0	2	0	0	0	0	0	0	0	0	0	0
OTU_2646	Eukaryota	Alveolata	Apicomplexa	Apicomplexa_X	Apicomplexa_XX	Apicomplexa_XXX	Apicomplexa_XXXX	Apicomplexa_XXXX_sp.	0	0	0	0	0	0	0	0	0	0	0	0	0	0	2	0	0	0	0	0	0	0	0	0	0	0	0	0	0	0	0	0	0	0
OTU_2648	Eukaryota	Archaeplastida	Chlorophyta	Ulvophyceae	Ulvales-relatives	Ulvales-relatives_X	Blidingia	Blidingia_dawsonii	0	0	0	0	0	0	0	0	0	0	0	0	0	0	0	0	0	0	0	0	0	0	0	0	0	0	0	0	0	0	2	0	0	0
OTU_2659	Eukaryota	Alveolata	Dinophyta	Dinophyceae	Dinophyceae_X	Pfiesteriaceae	Multi-affiliation	Multi-affiliation	0	0	0	0	0	0	0	0	0	0	0	0	0	3	0	0	0	0	0	0	0	0	0	0	0	0	0	0	0	0	0	0	0	0
OTU_2660	Eukaryota	Alveolata	Dinophyta	Dinophyceae	Suessiales	Suessiales_X	Woloszynskia	Woloszynskia_sp._strain1	0	0	0	0	0	0	0	0	0	0	0	0	0	0	0	0	0	3	0	0	0	0	0	0	0	0	0	0	0	0	0	0	0	0
OTU_2665	Eukaryota	Multi-affiliation	Multi-affiliation	Multi-affiliation	Multi-affiliation	Multi-affiliation	Multi-affiliation	Multi-affiliation	0	0	0	0	0	0	0	0	0	0	0	0	0	0	0	0	0	0	0	0	0	0	0	0	0	2	0	0	0	0	0	0	0	0
OTU_2666	Eukaryota	Multi-affiliation	Multi-affiliation	Multi-affiliation	Multi-affiliation	Multi-affiliation	Multi-affiliation	Multi-affiliation	0	0	0	0	2	0	0	0	0	0	0	0	0	0	0	0	0	0	0	0	0	0	0	0	0	0	0	0	0	0	0	0	0	0
OTU_2667	Eukaryota	Archaeplastida	Rhodophyta	Florideophyceae	Ceramiales	Rhodomelaceae	Leptosiphonia	Leptosiphonia_schousboei	0	0	0	0	0	0	0	0	0	0	0	0	0	0	2	0	0	0	0	0	0	0	0	0	0	0	0	0	0	0	0	0	0	0
OTU_2668	Eukaryota	Archaeplastida	Rhodophyta	Florideophyceae	Ceramiales	Rhodomelaceae	Polysiphonia	Polysiphonia_brodiei	0	0	0	0	0	0	0	0	0	0	0	0	0	0	2	0	0	0	0	0	0	0	0	0	0	0	0	0	0	0	0	0	0	0
OTU_2669	Eukaryota	Alveolata	Dinophyta	Dinophyceae	Dinophyceae_X	Dinophyceae_XX	Dinophyceae_XXX	Dinophyceae_XXX_sp.	0	0	0	0	0	0	0	0	0	0	2	0	0	0	0	0	0	0	0	0	0	0	0	0	0	0	0	0	0	0	0	0	0	0
OTU_2684	Eukaryota	Opisthokonta	Mesomycetozoa	Ichthyosporea	Ichthyosphonida	Pseudoperkinsidae	Pseudoperkinsidae_X	Pseudoperkinsidae_X_sp.	0	0	0	0	0	2	0	0	0	0	0	0	0	0	0	0	0	0	0	0	0	0	0	0	0	0	0	0	0	0	0	0	0	0
OTU_2685	Eukaryota	Alveolata	Dinophyta	Dinophyceae	Suessiales	Suessiales_X	Woloszynskia	Woloszynskia_sp._strain1	0	0	0	0	0	0	0	0	0	0	0	0	0	0	0	0	0	0	0	0	0	0	0	0	0	0	0	0	0	0	2	0	0	0
OTU_2691	Eukaryota	Archaeplastida	Chlorophyta	Ulvophyceae	Ulvales-relatives	Ulvales-relatives_X	Ulva	Ulva_intestinalis	0	0	0	0	0	0	0	0	0	0	0	0	0	0	0	0	0	0	0	0	0	0	0	2	0	0	0	0	0	0	0	0	0	0
OTU_2693	Eukaryota	Alveolata	Dinophyta	Dinophyceae	Dinophyceae_X	Ostreopsidaceae	Coolia	Coolia_monotis	0	0	0	0	0	0	0	0	0	0	0	0	0	0	0	0	0	0	0	0	0	0	0	0	0	0	0	0	2	0	0	0	0	0
OTU_2694	Eukaryota	Alveolata	Dinophyta	Syndiniales	Dino-Group-I	Dino-Group-I-Clade-4	Euduboscquella	Euduboscquella_crenulata	0	0	0	0	0	0	0	0	0	0	0	0	0	0	0	0	0	0	0	0	0	0	0	0	0	2	0	0	0	0	0	0	0	0
OTU_2695	Eukaryota	Alveolata	Dinophyta	Dinophyceae	Suessiales	Suessiales_X	Woloszynskia	Woloszynskia_sp._strain1	0	0	0	0	0	2	0	0	0	0	0	0	0	0	0	0	0	0	0	0	0	0	0	0	0	0	0	0	0	0	0	0	0	0
OTU_2698	Eukaryota	Alveolata	Dinophyta	Dinophyceae	Dinophyceae_X	Dinophyceae_XX	Gymnodinium	Gymnodinium_dorsalisulcum	0	0	0	0	0	0	0	0	0	0	0	0	0	0	0	0	0	0	0	0	0	0	0	0	0	0	0	0	0	0	0	2	0	0
OTU_2700	Eukaryota	Stramenopiles	Ochrophyta	Bacillariophyta	Bacillariophyta_X	Raphid-pennate	Navicula	Navicula_perminuta	0	0	0	0	0	0	0	2	0	0	0	0	0	0	0	0	0	0	0	0	0	0	0	0	0	0	0	0	0	0	0	0	0	0
OTU_2702	Eukaryota	Stramenopiles	Ochrophyta	Bacillariophyta	Bacillariophyta_X	Polar-centric-Mediophyceae	Chaetoceros	Multi-affiliation	0	0	0	0	0	0	0	0	0	0	0	0	0	0	2	0	0	0	0	0	0	0	0	0	0	0	0	0	0	0	0	0	0	0
OTU_2714	Eukaryota	Alveolata	Dinophyta	Dinophyceae	Dinophyceae_X	Dinophyceae_XX	Dinophyceae_XXX	Dinophyceae_XXX_sp.	0	0	0	0	0	0	0	0	0	0	0	0	0	0	0	0	0	0	0	2	0	0	0	0	0	0	0	0	0	0	0	0	0	0
OTU_2716	Eukaryota	Alveolata	Dinophyta	Dinophyceae	Dinophyceae_X	Dinophyceae_XX	Gymnodinium	Gymnodinium_dorsalisulcum	0	0	0	0	0	0	0	0	0	0	0	0	0	0	0	0	0	0	0	0	0	0	0	0	0	0	0	2	0	0	0	0	0	0
OTU_2718	Eukaryota	Alveolata	Dinophyta	Dinophyceae	Suessiales	Suessiales_X	Woloszynskia	Woloszynskia_sp._strain1	0	0	0	0	0	1	0	0	0	1	0	0	0	0	0	0	0	0	0	0	0	0	0	0	0	0	0	0	0	0	0	0	0	0
OTU_2719	Eukaryota	Alveolata	Dinophyta	Dinophyceae	Suessiales	Suessiales_X	Woloszynskia	Woloszynskia_sp._strain1	2	0	0	0	0	0	0	0	0	0	0	0	0	0	0	0	0	0	0	0	0	0	0	0	0	0	0	0	0	0	0	0	0	0
OTU_2721	Eukaryota	Alveolata	Dinophyta	Dinophyceae	Dinophyceae_X	Dinophyceae_XX	Alexandrium	Multi-affiliation	0	0	0	0	0	0	0	0	0	0	0	0	0	0	0	0	0	2	0	0	0	0	0	0	0	0	0	0	0	0	0	0	0	0
OTU_2722	Eukaryota	Alveolata	Dinophyta	Dinophyceae	Dinophyceae_X	Dinophyceae_XX	Alexandrium	Multi-affiliation	2	0	0	0	0	0	0	0	0	0	0	0	0	0	0	0	0	0	0	0	0	0	0	0	0	0	0	0	0	0	0	0	0	0
OTU_2724	Eukaryota	Alveolata	Dinophyta	Dinophyceae	Dinophyceae_X	Dinophyceae_XX	Dinophyceae_XXX	Dinophyceae_XXX_sp.	0	0	0	0	3	0	0	0	0	0	0	0	0	0	0	0	0	0	0	0	0	0	0	0	0	0	0	0	0	0	0	0	0	0
OTU_2725	Eukaryota	Alveolata	Dinophyta	Syndiniales	Dino-Group-II	Dino-Group-II-Clade-39	Dino-Group-II-Clade-39_X	Dino-Group-II-Clade-39_X_sp.	0	0	0	0	0	0	0	0	0	0	0	0	0	0	0	0	0	0	0	0	0	0	0	0	0	0	0	0	0	2	0	0	0	0
OTU_2756	Eukaryota	Alveolata	Dinophyta	Dinophyceae	Dinophyceae_X	Dinophyceae_XX	Dinophyceae_XXX	Dinophyceae_XXX_sp.	0	0	0	0	0	0	0	0	0	0	0	0	0	0	0	0	0	0	0	0	0	0	0	0	0	0	0	0	0	0	0	0	0	2
OTU_2757	Eukaryota	Alveolata	Dinophyta	Dinophyceae	Suessiales	Suessiales_X	Suessiales_XX	Suessiales_XX_sp.	0	0	0	0	0	0	0	0	0	0	0	0	0	2	0	0	0	0	0	0	0	0	0	0	0	0	0	0	0	0	0	0	0	0
OTU_2758	Eukaryota	Alveolata	Dinophyta	Dinophyceae	Dinophyceae_X	Dinophyceae_XX	Dinophyceae_XXX	Dinophyceae_XXX_sp.	0	0	0	0	0	0	0	0	0	0	0	0	0	0	0	0	0	0	0	0	2	0	0	0	0	0	0	0	0	0	0	0	0	0
OTU_2759	Eukaryota	Alveolata	Dinophyta	Dinophyceae	Dinophyceae_X	Multi-affiliation	Multi-affiliation	Multi-affiliation	0	1	0	0	0	0	0	0	0	0	0	0	0	0	0	0	0	0	0	0	0	0	0	0	0	0	0	0	0	0	0	0	1	0
OTU_2761	Eukaryota	Alveolata	Dinophyta	Dinophyceae	Dinophyceae_X	Dinophyceae_XX	Multi-affiliation	Multi-affiliation	0	0	0	0	2	0	0	0	0	0	0	0	0	0	0	0	0	0	0	0	0	0	0	0	0	0	0	0	0	0	0	0	0	0
OTU_2763	Eukaryota	Alveolata	Dinophyta	Dinophyceae	Suessiales	Suessiales_X	Woloszynskia	Woloszynskia_sp._strain1	0	0	0	0	0	2	0	0	0	0	0	0	0	0	0	0	0	0	0	0	0	0	0	0	0	0	0	0	0	0	0	0	0	0
OTU_2764	Eukaryota	Alveolata	Dinophyta	Dinophyceae	Suessiales	Suessiales_X	Woloszynskia	Woloszynskia_sp._strain1	0	0	0	0	0	0	0	2	0	0	0	0	0	0	0	0	0	0	0	0	0	0	0	0	0	0	0	0	0	0	0	0	0	0
OTU_2765	Eukaryota	Alveolata	Dinophyta	Dinophyceae	Suessiales	Suessiales_X	Woloszynskia	Woloszynskia_sp._strain1	0	0	0	0	0	0	0	0	0	0	0	0	0	0	0	0	0	0	0	0	0	0	0	0	0	0	0	0	0	0	0	0	0	2
OTU_2769	Eukaryota	Alveolata	Dinophyta	Dinophyceae	Suessiales	Suessiales_X	Multi-affiliation	Multi-affiliation	0	0	0	0	0	2	0	0	0	0	0	0	0	0	0	0	0	0	0	0	0	0	0	0	0	0	0	0	0	0	0	0	0	0
OTU_2771	Eukaryota	Alveolata	Dinophyta	Dinophyceae	Dinophyceae_X	Dinophyceae_XX	Dinophyceae_XXX	Dinophyceae_XXX_sp.	0	0	0	2	0	0	0	0	0	0	0	0	0	0	0	0	0	0	0	0	0	0	0	0	0	0	0	0	0	0	0	0	0	0
OTU_2772	Eukaryota	Multi-affiliation	Multi-affiliation	Multi-affiliation	Multi-affiliation	Multi-affiliation	Multi-affiliation	Multi-affiliation	0	0	0	0	0	0	0	2	0	0	0	0	0	0	0	0	0	0	0	0	0	0	0	0	0	0	0	0	0	0	0	0	0	0
OTU_2773	Eukaryota	Alveolata	Dinophyta	Dinophyceae	Dinophyceae_X	Dinophyceae_XX	Dinophyceae_XXX	Dinophyceae_XXX_sp.	0	0	0	0	0	0	0	0	2	0	0	0	0	0	0	0	0	0	0	0	0	0	0	0	0	0	0	0	0	0	0	0	0	0
OTU_2775	Eukaryota	Alveolata	Dinophyta	Dinophyceae	Dinophyceae_X	Dinophyceae_XX	Dinophyceae_XXX	Dinophyceae_XXX_sp.	0	0	0	0	0	0	0	0	0	0	0	0	0	0	0	0	0	0	0	0	0	0	0	0	0	0	0	0	0	3	0	0	0	0
OTU_2776	Eukaryota	Alveolata	Dinophyta	Dinophyceae	Dinophyceae_X	Dinophyceae_XX	Dinophyceae_XXX	Dinophyceae_XXX_sp.	0	0	0	0	0	0	0	0	0	0	0	0	0	0	0	0	0	0	0	0	0	0	0	0	0	0	0	0	0	2	0	0	0	0
OTU_2778	Eukaryota	Alveolata	Dinophyta	Dinophyceae	Dinophyceae_X	Dinophyceae_XX	Dinophyceae_XXX	Dinophyceae_XXX_sp.	0	0	0	0	0	0	0	0	0	0	0	0	2	0	0	0	0	0	0	0	0	0	0	0	0	0	0	0	0	0	0	0	0	0
OTU_2780	Eukaryota	Alveolata	Dinophyta	Dinophyceae	Suessiales	Suessiales_X	Woloszynskia	Woloszynskia_sp._strain1	0	0	0	0	0	0	0	0	0	0	0	0	0	0	0	0	0	2	0	0	0	0	0	0	0	0	0	0	0	0	0	0	0	0
OTU_2781	Eukaryota	Alveolata	Dinophyta	Dinophyceae	Suessiales	Suessiales_X	Woloszynskia	Woloszynskia_sp._strain1	0	0	0	0	0	0	0	0	0	0	2	0	0	0	0	0	0	0	0	0	0	0	0	0	0	0	0	0	0	0	0	0	0	0
OTU_2783	Eukaryota	Alveolata	Dinophyta	Dinophyceae	Suessiales	Suessiales_X	Woloszynskia	Woloszynskia_sp._strain1	0	0	0	0	0	0	0	0	0	0	0	0	0	0	0	0	0	0	0	0	0	0	0	0	0	0	0	0	0	2	0	0	0	0
OTU_2786	Eukaryota	Alveolata	Dinophyta	Dinophyceae	Dinophyceae_X	Dinophyceae_XX	Dinophyceae_XXX	Dinophyceae_XXX_sp.	0	0	0	0	0	0	0	0	0	0	0	0	0	0	0	0	0	0	0	0	0	0	0	0	0	0	0	0	0	2	0	0	0	0
OTU_2787	Eukaryota	Alveolata	Dinophyta	Dinophyceae	Suessiales	Suessiales_X	Woloszynskia	Woloszynskia_sp._strain1	0	0	0	0	0	0	0	0	2	0	0	0	0	0	0	0	0	0	0	0	0	0	0	0	0	0	0	0	0	0	0	0	0	0
OTU_2788	Eukaryota	Alveolata	Dinophyta	Dinophyceae	Dinophyceae_X	Dinophyceae_XX	Gymnodinium	Gymnodinium_dorsalisulcum	0	0	0	0	0	0	0	0	0	0	0	0	2	0	0	0	0	0	0	0	0	0	0	0	0	0	0	0	0	0	0	0	0	0
OTU_2790	Eukaryota	Alveolata	Dinophyta	Dinophyceae	Suessiales	Suessiales_X	Woloszynskia	Woloszynskia_sp._strain1	0	0	0	0	0	0	0	0	0	2	0	0	0	0	0	0	0	0	0	0	0	0	0	0	0	0	0	0	0	0	0	0	0	0
OTU_2794	Eukaryota	Alveolata	Dinophyta	Dinophyceae	Dinophyceae_X	Dinophyceae_XX	Dinophyceae_XXX	Dinophyceae_XXX_sp.	0	0	0	2	0	0	0	0	0	0	0	0	0	0	0	0	0	0	0	0	0	0	0	0	0	0	0	0	0	0	0	0	0	0
OTU_2796	Eukaryota	Alveolata	Dinophyta	Dinophyceae	Suessiales	Suessiales_X	Woloszynskia	Woloszynskia_sp._strain1	0	0	0	0	0	0	0	0	0	0	0	0	0	0	0	0	0	0	0	0	0	0	0	0	0	0	0	0	0	0	2	0	0	0
OTU_2797	Eukaryota	Alveolata	Dinophyta	Dinophyceae	Suessiales	Suessiales_X	Woloszynskia	Woloszynskia_sp._strain1	0	0	0	0	0	0	0	0	0	0	0	0	0	0	0	0	1	0	0	0	0	0	0	0	0	0	0	0	0	0	0	0	0	0
OTU_2798	Eukaryota	Alveolata	Dinophyta	Dinophyceae	Suessiales	Suessiales_X	Multi-affiliation	Multi-affiliation	0	0	0	0	0	2	0	0	0	0	0	0	0	0	0	0	0	0	0	0	0	0	0	0	0	0	0	0	0	0	0	0	0	0
OTU_2799	Eukaryota	Alveolata	Dinophyta	Dinophyceae	Dinophyceae_X	Dinophyceae_XX	Ensiculifera	Ensiculifera_loeblichii	0	0	0	0	0	0	2	0	0	0	0	0	0	0	0	0	0	0	0	0	0	0	0	0	0	0	0	0	0	0	0	0	0	0
OTU_2804	Eukaryota	Stramenopiles	Ochrophyta	Bacillariophyta	Bacillariophyta_X	Raphid-pennate	Seminavis	Multi-affiliation	0	0	0	0	0	0	0	0	0	0	0	0	0	0	0	0	0	0	0	0	0	0	0	2	0	0	0	0	0	0	0	0	0	0
OTU_2805	Eukaryota	Opisthokonta	Choanoflagellida	Choanoflagellatea	Acanthoecida	Acanthoecidae_Group_G	Calliacantha	Calliacantha_sp.	0	0	0	0	0	0	0	0	0	0	0	0	0	0	0	0	0	0	0	0	0	0	3	0	0	0	0	0	0	0	0	0	0	0
OTU_2806	Eukaryota	Stramenopiles	Ochrophyta	Bacillariophyta	Bacillariophyta_X	Raphid-pennate	Navicula	Multi-affiliation	0	0	0	0	0	0	0	0	0	2	0	0	0	0	0	0	0	0	0	0	0	0	0	0	0	0	0	0	0	0	0	0	0	0
OTU_2808	Eukaryota	Alveolata	Dinophyta	Dinophyceae	Dinophyceae_X	Dinophyceae_XX	Scrippsiella	Scrippsiella_trochoidea	0	0	0	0	0	2	0	0	0	0	0	0	0	0	0	0	0	0	0	0	0	0	0	0	0	0	0	0	0	0	0	0	0	0
OTU_2809	Eukaryota	Alveolata	Dinophyta	Dinophyceae	Suessiales	Suessiales_X	Suessiales_XX	Suessiales_XX_sp.	0	0	2	0	0	0	0	0	0	0	0	0	0	0	0	0	0	0	0	0	0	0	0	0	0	0	0	0	0	0	0	0	0	0
OTU_2810	Eukaryota	Alveolata	Dinophyta	Dinophyceae	Suessiales	Suessiales_X	Suessiales_XX	Suessiales_XX_sp.	0	0	0	0	0	0	0	0	0	0	0	0	0	0	0	0	0	0	0	0	0	0	0	0	0	0	0	0	2	0	0	0	0	0
OTU_2811	Eukaryota	Alveolata	Dinophyta	Dinophyceae	Suessiales	Suessiales_X	Symbiodinium	Symbiodinium_sp.	0	1	0	0	0	0	0	0	0	0	0	0	0	0	0	0	0	0	0	0	0	0	0	0	1	0	0	1	0	0	0	0	0	0
OTU_2814	Eukaryota	Alveolata	Dinophyta	Dinophyceae	Dinophyceae_X	Dinophyceae_XX	Alexandrium	Multi-affiliation	0	0	0	0	0	0	0	0	0	0	0	0	0	0	2	0	0	0	0	0	0	0	0	0	0	0	0	0	0	0	0	0	0	0
OTU_2815	Eukaryota	Alveolata	Dinophyta	Dinophyceae	Dinophyceae_X	Dinophyceae_XX	Alexandrium	Multi-affiliation	0	0	0	0	0	0	0	0	0	0	0	0	0	0	2	0	0	0	0	0	0	0	0	0	0	0	0	0	0	0	0	0	0	0
OTU_2819	Eukaryota	Alveolata	Dinophyta	Dinophyceae	Suessiales	Suessiales_X	Suessiales_XX	Suessiales_XX_sp.	0	0	0	0	0	0	0	0	0	0	0	0	0	0	0	0	0	0	0	0	0	0	0	0	0	0	0	0	5	0	0	0	0	0
OTU_2820	Eukaryota	Alveolata	Dinophyta	Dinophyceae	Suessiales	Suessiales_X	Woloszynskia	Woloszynskia_sp._strain1	0	0	0	0	0	0	0	0	0	0	0	0	0	0	0	0	0	0	0	0	0	0	0	0	0	0	0	0	3	0	0	0	0	0
OTU_2821	Eukaryota	Alveolata	Dinophyta	Dinophyceae	Suessiales	Suessiales_X	Woloszynskia	Woloszynskia_sp._strain1	0	0	0	0	0	0	0	0	0	0	0	0	0	0	0	0	2	0	0	0	0	0	0	0	0	0	0	0	0	0	0	0	0	0
OTU_2831	Eukaryota	Alveolata	Dinophyta	Dinophyceae	Suessiales	Suessiales_X	Woloszynskia	Woloszynskia_sp._strain1	0	0	0	0	0	0	0	0	0	0	0	0	0	0	0	0	2	0	0	0	0	0	0	0	0	0	0	0	0	0	0	0	0	0
OTU_2832	Eukaryota	Alveolata	Dinophyta	Dinophyceae	Suessiales	Suessiales_X	Woloszynskia	Woloszynskia_sp._strain1	0	0	0	0	0	0	0	0	0	0	0	0	0	0	0	0	0	0	0	2	0	0	0	0	0	0	0	0	0	0	0	0	0	0
OTU_2835	Eukaryota	Alveolata	Dinophyta	Dinophyceae	Dinophyceae_X	Dinophyceae_XX	Multi-affiliation	Multi-affiliation	0	0	0	0	0	0	0	0	0	0	0	0	0	0	0	0	0	0	0	0	0	0	0	2	0	0	0	0	0	0	0	0	0	0
OTU_2836	Eukaryota	Alveolata	Dinophyta	Dinophyceae	Dinophyceae_X	Dinophyceae_XX	Dinophyceae_XXX	Dinophyceae_XXX_sp.	0	0	0	0	0	0	0	0	0	0	0	0	0	0	0	0	0	0	0	0	0	0	0	0	0	0	0	0	0	0	0	0	0	3
OTU_2838	Eukaryota	Alveolata	Dinophyta	Dinophyceae	Dinophyceae_X	Pfiesteriaceae	Multi-affiliation	Multi-affiliation	0	2	0	0	0	0	0	0	0	0	0	0	0	0	0	0	0	0	0	0	0	0	0	0	0	0	0	0	0	0	0	0	0	0
OTU_2839	Eukaryota	Alveolata	Dinophyta	Dinophyceae	Suessiales	Suessiales_X	Suessiales_XX	Suessiales_XX_sp.	0	0	0	0	0	0	0	0	0	0	0	0	0	0	0	0	0	0	0	0	0	0	0	0	0	0	0	0	0	3	0	0	0	0
OTU_2843	Eukaryota	Alveolata	Dinophyta	Dinophyceae	Dinophyceae_X	Pfiesteriaceae	Multi-affiliation	Multi-affiliation	0	2	0	0	0	0	0	0	0	0	0	0	0	0	0	0	0	0	0	0	0	0	0	0	0	0	0	0	0	0	0	0	0	0
OTU_2851	Eukaryota	Alveolata	Dinophyta	Dinophyceae	Dinophyceae_X	Dinophyceae_XX	Multi-affiliation	Multi-affiliation	0	0	0	0	0	0	0	0	0	1	0	0	0	0	0	0	1	0	0	0	0	0	0	0	0	0	0	0	0	0	0	0	0	0
OTU_2855	Eukaryota	Alveolata	Dinophyta	Dinophyceae	Dinophyceae_X	Dinophyceae_XX	Multi-affiliation	Multi-affiliation	0	0	0	0	0	0	0	2	0	0	0	0	0	0	0	0	0	0	0	0	0	0	0	0	0	0	0	0	0	0	0	0	0	0
OTU_2856	Eukaryota	Alveolata	Dinophyta	Dinophyceae	Dinophyceae_X	Dinophyceae_XX	Multi-affiliation	Multi-affiliation	0	0	0	0	0	0	0	0	0	0	0	0	0	0	3	0	0	0	0	0	0	0	0	0	0	0	0	0	0	0	0	0	0	0
OTU_2860	Eukaryota	Alveolata	Dinophyta	Dinophyceae	Suessiales	Suessiales_X	Multi-affiliation	Multi-affiliation	0	0	0	0	0	0	0	0	0	0	0	0	0	2	0	0	0	0	0	0	0	0	0	0	0	0	0	0	0	0	0	0	0	0
OTU_2862	Eukaryota	Alveolata	Dinophyta	Dinophyceae	Suessiales	Suessiales_X	Multi-affiliation	Multi-affiliation	0	0	0	0	0	1	0	0	0	0	0	0	0	0	0	0	0	0	0	1	0	0	0	0	0	0	0	0	0	0	0	0	0	0
OTU_2863	Eukaryota	Alveolata	Dinophyta	Dinophyceae	Suessiales	Suessiales_X	Symbiodinium	Symbiodinium_sp.	0	0	0	0	0	0	0	0	1	0	0	0	0	0	0	0	0	0	0	0	1	0	0	0	0	0	0	0	0	0	0	0	0	0
OTU_2865	Eukaryota	Multi-affiliation	Multi-affiliation	Multi-affiliation	Multi-affiliation	Multi-affiliation	Multi-affiliation	Multi-affiliation	0	0	0	0	0	0	0	0	2	0	0	0	0	0	0	0	0	0	0	0	0	0	0	0	0	0	0	0	0	0	0	0	0	0
OTU_2868	Eukaryota	Alveolata	Dinophyta	Dinophyceae	Dinophyceae_X	Dinophyceae_XX	Dinophyceae_XXX	Dinophyceae_XXX_sp.	0	0	0	0	0	0	0	0	2	0	0	0	0	0	0	0	0	0	0	0	0	0	0	0	0	0	0	0	0	0	0	0	0	0
OTU_2874	Eukaryota	Alveolata	Dinophyta	Dinophyceae	Dinophyceae_X	Dinophyceae_XX	Multi-affiliation	Multi-affiliation	0	0	0	0	3	0	0	0	0	0	0	0	0	0	0	0	0	0	0	0	0	0	0	0	0	0	0	0	0	0	0	0	0	0
OTU_2875	Eukaryota	Alveolata	Dinophyta	Dinophyceae	Suessiales	Suessiales_X	Woloszynskia	Woloszynskia_sp._strain1	0	2	0	0	0	0	0	0	0	0	0	0	0	0	0	0	0	0	0	0	0	0	0	0	0	0	0	0	0	0	0	0	0	0
OTU_2876	Eukaryota	Alveolata	Dinophyta	Dinophyceae	Dinophyceae_X	Dinophyceae_XX	Dinophyceae_XXX	Dinophyceae_XXX_sp.	0	0	0	0	0	0	0	0	2	0	0	0	0	0	0	0	0	0	0	0	0	0	0	0	0	0	0	0	0	0	0	0	0	0
OTU_2878	Eukaryota	Alveolata	Dinophyta	Dinophyceae	Dinophyceae_X	Dinophyceae_XX	Pentapharsodinium	Pentapharsodinium_tyrrhenicum	0	0	0	0	0	0	0	0	0	0	0	0	0	0	0	2	0	0	0	0	0	0	0	0	0	0	0	0	0	0	0	0	0	0
OTU_2879	Eukaryota	Alveolata	Dinophyta	Dinophyceae	Dinophyceae_X	Dinophyceae_XX	Dinophyceae_XXX	Dinophyceae_XXX_sp.	0	0	2	0	0	0	0	0	0	0	0	0	0	0	0	0	0	0	0	0	0	0	0	0	0	0	0	0	0	0	0	0	0	0
OTU_2883	Eukaryota	Alveolata	Dinophyta	Dinophyceae	Dinophyceae_X	Dinophyceae_XX	Dinophyceae_XXX	Dinophyceae_XXX_sp.	0	0	0	0	0	3	0	0	0	0	0	0	0	0	0	0	0	0	0	0	0	0	0	0	0	0	0	0	0	0	0	0	0	0
OTU_2885	Eukaryota	Alveolata	Dinophyta	Dinophyceae	Dinophyceae_X	Dinophyceae_XX	Pentapharsodinium	Pentapharsodinium_tyrrhenicum	0	0	0	0	0	0	0	0	0	0	0	0	0	0	0	0	0	0	0	0	0	0	3	0	0	0	0	0	0	0	0	0	0	0
OTU_2891	Eukaryota	Alveolata	Dinophyta	Dinophyceae	Dinophyceae_X	Dinophyceae_XX	Pentapharsodinium	Pentapharsodinium_tyrrhenicum	0	0	0	0	0	0	0	0	0	0	0	0	0	0	2	0	0	0	0	0	0	0	0	0	0	0	0	0	0	0	0	0	0	0
OTU_2893	Eukaryota	Alveolata	Dinophyta	Dinophyceae	Dinophyceae_X	Dinophyceae_XX	Gymnodinium	Gymnodinium_dorsalisulcum	0	0	0	0	0	0	0	1	0	0	0	0	0	0	0	0	0	0	0	0	0	0	0	0	0	0	0	0	0	0	0	0	0	0
OTU_2900	Eukaryota	Alveolata	Dinophyta	Dinophyceae	Dinophyceae_X	Dinophyceae_XX	Gymnodinium	Gymnodinium_dorsalisulcum	0	0	0	0	0	0	0	0	0	0	0	2	0	0	0	0	0	0	0	0	0	0	0	0	0	0	0	0	0	0	0	0	0	0
OTU_2902	Eukaryota	Alveolata	Dinophyta	Dinophyceae	Suessiales	Suessiales_X	Woloszynskia	Woloszynskia_sp._strain1	0	0	0	0	0	0	0	0	0	0	0	0	0	0	0	0	0	0	0	0	0	0	0	0	0	0	0	0	0	0	0	2	0	0
OTU_2904	Eukaryota	Alveolata	Dinophyta	Dinophyceae	Suessiales	Suessiales_X	Woloszynskia	Woloszynskia_sp._strain1	0	0	0	0	0	2	0	0	0	0	0	0	0	0	0	0	0	0	0	0	0	0	0	0	0	0	0	0	0	0	0	0	0	0
OTU_2905	Eukaryota	Alveolata	Dinophyta	Dinophyceae	Suessiales	Suessiales_X	Woloszynskia	Woloszynskia_sp._strain1	0	0	0	0	0	0	0	0	0	0	0	0	0	0	0	0	0	0	0	0	0	2	0	0	0	0	0	0	0	0	0	0	0	0
OTU_2906	Eukaryota	Alveolata	Dinophyta	Dinophyceae	Suessiales	Suessiales_X	Woloszynskia	Woloszynskia_sp._strain1	0	0	0	0	0	0	0	0	0	0	1	0	0	0	0	0	0	0	0	1	0	0	0	0	0	0	0	0	0	0	0	0	0	0
OTU_2907	Eukaryota	Alveolata	Dinophyta	Dinophyceae	Suessiales	Suessiales_X	Multi-affiliation	Multi-affiliation	0	3	0	0	0	0	0	0	0	0	0	0	0	0	0	0	0	0	0	0	0	0	0	0	0	0	0	0	0	0	0	0	0	0
OTU_2911	Eukaryota	Alveolata	Dinophyta	Dinophyceae	Suessiales	Suessiales_X	Woloszynskia	Woloszynskia_sp._strain1	0	0	0	0	0	0	0	0	0	0	0	0	0	0	0	0	0	0	0	0	0	0	0	0	0	2	0	0	0	0	0	0	0	0
OTU_2912	Eukaryota	Alveolata	Dinophyta	Dinophyceae	Suessiales	Suessiales_X	Woloszynskia	Woloszynskia_sp._strain1	0	0	0	0	0	2	0	0	0	0	0	0	0	0	0	0	0	0	0	0	0	0	0	0	0	0	0	0	0	0	0	0	0	0
OTU_2913	Eukaryota	Alveolata	Dinophyta	Dinophyceae	Suessiales	Suessiales_X	Woloszynskia	Woloszynskia_sp._strain1	0	0	0	0	0	0	0	0	0	0	0	0	0	0	0	0	0	0	0	0	0	0	0	0	2	0	0	0	0	0	0	0	0	0
OTU_2915	Eukaryota	Alveolata	Dinophyta	Dinophyceae	Suessiales	Suessiales_X	Woloszynskia	Woloszynskia_sp._strain1	0	0	0	0	0	0	0	0	0	0	0	0	0	0	0	0	2	0	0	0	0	0	0	0	0	0	0	0	0	0	0	0	0	0
OTU_2916	Eukaryota	Alveolata	Dinophyta	Dinophyceae	Suessiales	Suessiales_X	Woloszynskia	Woloszynskia_sp._strain1	0	0	0	0	0	0	0	2	0	0	0	0	0	0	0	0	0	0	0	0	0	0	0	0	0	0	0	0	0	0	0	0	0	0
OTU_2917	Eukaryota	Alveolata	Dinophyta	Dinophyceae	Suessiales	Suessiales_X	Woloszynskia	Woloszynskia_sp._strain1	0	0	0	0	0	0	0	0	2	0	0	0	0	0	0	0	0	0	0	0	0	0	0	0	0	0	0	0	0	0	0	0	0	0
OTU_2919	Eukaryota	Alveolata	Dinophyta	Dinophyceae	Suessiales	Suessiales_X	Woloszynskia	Woloszynskia_sp._strain1	0	0	0	0	0	0	0	0	0	0	0	0	0	0	0	0	0	0	0	0	0	0	0	0	0	0	0	0	0	2	0	0	0	0
OTU_2920	Eukaryota	Alveolata	Dinophyta	Dinophyceae	Suessiales	Suessiales_X	Woloszynskia	Woloszynskia_sp._strain1	0	0	0	0	0	0	0	0	0	0	1	0	0	0	0	0	0	0	0	0	0	0	0	0	0	0	0	0	0	0	0	0	0	0
OTU_2923	Eukaryota	Alveolata	Dinophyta	Dinophyceae	Suessiales	Suessiales_X	Woloszynskia	Woloszynskia_sp._strain1	1	1	0	0	0	0	0	0	0	0	0	0	0	0	0	0	0	0	0	0	0	0	0	0	0	0	0	0	0	0	0	0	0	0
OTU_2924	Eukaryota	Alveolata	Dinophyta	Dinophyceae	Suessiales	Suessiales_X	Woloszynskia	Woloszynskia_sp._strain1	0	0	0	0	0	0	0	0	0	0	0	0	0	0	0	0	0	0	0	0	0	0	0	0	2	0	0	0	0	0	0	0	0	0
OTU_2928	Eukaryota	Alveolata	Dinophyta	Dinophyceae	Suessiales	Suessiales_X	Woloszynskia	Woloszynskia_sp._strain1	0	1	0	0	0	0	0	0	0	0	0	0	0	0	0	0	0	0	0	0	0	0	0	0	0	0	0	0	0	0	0	0	0	0
OTU_2930	Eukaryota	Alveolata	Dinophyta	Dinophyceae	Suessiales	Suessiales_X	Woloszynskia	Woloszynskia_sp._strain1	2	0	0	0	0	0	0	0	0	0	0	0	0	0	0	0	0	0	0	0	0	0	0	0	0	0	0	0	0	0	0	0	0	0
OTU_2931	Eukaryota	Alveolata	Dinophyta	Dinophyceae	Suessiales	Suessiales_X	Woloszynskia	Woloszynskia_sp._strain1	0	0	0	0	0	2	0	0	0	0	0	0	0	0	0	0	0	0	0	0	0	0	0	0	0	0	0	0	0	0	0	0	0	0
OTU_2932	Eukaryota	Alveolata	Dinophyta	Dinophyceae	Suessiales	Suessiales_X	Woloszynskia	Woloszynskia_sp._strain1	0	0	0	0	0	0	0	2	0	0	0	0	0	0	0	0	0	0	0	0	0	0	0	0	0	0	0	0	0	0	0	0	0	0
OTU_2933	Eukaryota	Alveolata	Dinophyta	Dinophyceae	Suessiales	Suessiales_X	Woloszynskia	Woloszynskia_sp._strain1	0	0	0	1	0	0	0	0	0	0	0	0	0	0	0	0	0	0	0	0	0	0	0	0	0	0	0	0	0	0	0	0	0	0
OTU_2934	Eukaryota	Alveolata	Dinophyta	Dinophyceae	Multi-affiliation	Multi-affiliation	Multi-affiliation	Multi-affiliation	0	0	0	0	0	0	0	0	0	0	0	0	0	0	0	0	0	0	0	0	0	0	0	0	0	0	0	0	0	1	0	0	0	0
OTU_2936	Eukaryota	Alveolata	Dinophyta	Dinophyceae	Suessiales	Suessiales_X	Woloszynskia	Woloszynskia_sp._strain1	0	0	0	0	0	0	0	0	0	0	0	0	0	0	0	0	0	0	0	0	0	0	0	0	0	0	3	0	0	0	0	0	0	0
OTU_2939	Eukaryota	Alveolata	Dinophyta	Dinophyceae	Suessiales	Suessiales_X	Woloszynskia	Woloszynskia_sp._strain1	0	0	0	0	0	0	0	0	0	0	0	0	0	0	0	0	0	0	0	0	0	0	0	0	0	2	0	0	0	0	0	0	0	0
OTU_2940	Eukaryota	Alveolata	Dinophyta	Dinophyceae	Suessiales	Suessiales_X	Symbiodinium	Multi-affiliation	0	0	0	0	0	0	0	0	0	0	0	0	1	0	0	0	0	0	0	0	0	0	0	0	0	0	0	0	0	0	0	0	0	0
OTU_2941	Eukaryota	Multi-affiliation	Multi-affiliation	Multi-affiliation	Multi-affiliation	Multi-affiliation	Multi-affiliation	Multi-affiliation	0	0	0	0	0	0	2	0	0	0	0	0	0	0	0	0	0	0	0	0	0	0	0	0	0	0	0	0	0	0	0	0	0	0
OTU_2942	Eukaryota	Alveolata	Dinophyta	Dinophyceae	Suessiales	Suessiales_X	Woloszynskia	Woloszynskia_sp._strain1	0	0	0	0	0	0	0	0	0	0	0	0	0	0	0	0	0	0	0	0	0	0	0	0	0	0	0	0	0	2	0	0	0	0
OTU_2944	Eukaryota	Alveolata	Dinophyta	Dinophyceae	Multi-affiliation	Multi-affiliation	Multi-affiliation	Multi-affiliation	1	0	0	0	0	0	0	0	0	0	0	0	0	0	0	0	1	0	0	0	0	0	0	0	0	0	0	0	0	0	1	0	0	0
OTU_2945	Eukaryota	Alveolata	Dinophyta	Dinophyceae	Suessiales	Suessiales_X	Woloszynskia	Woloszynskia_sp._strain1	0	0	0	0	0	0	0	0	0	0	0	0	0	0	0	0	0	0	0	0	0	0	0	0	0	0	0	0	2	0	0	0	0	0
OTU_2946	Eukaryota	Alveolata	Dinophyta	Dinophyceae	Suessiales	Suessiales_X	Symbiodinium	Multi-affiliation	0	0	0	0	0	0	0	0	0	0	0	0	0	0	0	0	0	0	0	0	0	0	0	0	1	0	0	0	2	0	0	0	0	0
OTU_2949	Eukaryota	Alveolata	Dinophyta	Dinophyceae	Suessiales	Suessiales_X	Suessiales_XX	Suessiales_XX_sp.	0	0	0	0	0	0	0	0	0	0	0	0	1	0	0	0	0	0	0	0	0	0	0	0	0	0	0	0	0	0	0	0	0	0
OTU_2950	Eukaryota	Alveolata	Dinophyta	Dinophyceae	Multi-affiliation	Multi-affiliation	Multi-affiliation	Multi-affiliation	0	1	0	0	0	0	0	0	0	0	0	0	0	0	0	0	1	1	0	0	0	0	0	0	0	1	0	0	0	0	0	0	0	0
OTU_2953	Eukaryota	Alveolata	Dinophyta	Dinophyceae	Suessiales	Suessiales_X	Suessiales_XX	Suessiales_XX_sp.	0	0	0	0	0	0	0	0	0	0	0	0	0	0	0	0	0	0	0	0	2	0	0	0	0	0	0	0	0	0	0	0	0	0
OTU_2954	Eukaryota	Alveolata	Dinophyta	Dinophyceae	Suessiales	Suessiales_X	Suessiales_XX	Suessiales_XX_sp.	0	0	0	0	0	0	0	0	0	0	0	0	0	0	0	0	0	0	0	0	0	1	0	0	0	0	0	0	0	0	0	0	0	0
OTU_2955	Eukaryota	Alveolata	Dinophyta	Dinophyceae	Suessiales	Suessiales_X	Woloszynskia	Woloszynskia_sp._strain1	0	0	0	0	0	1	0	0	0	0	0	0	0	0	0	0	0	0	0	0	0	0	0	0	0	0	0	0	0	0	0	0	0	0
OTU_2956	Eukaryota	Alveolata	Dinophyta	Dinophyceae	Suessiales	Suessiales_X	Woloszynskia	Woloszynskia_sp._strain1	0	0	0	0	0	0	0	0	0	0	0	0	0	0	0	0	1	0	0	0	0	0	0	0	0	1	0	0	0	0	0	0	0	0
OTU_2957	Eukaryota	Alveolata	Dinophyta	Dinophyceae	Suessiales	Suessiales_X	Woloszynskia	Woloszynskia_sp._strain1	0	0	0	0	0	0	0	0	1	0	0	0	0	0	0	0	0	0	0	0	0	0	0	0	0	1	0	0	0	0	0	0	0	0
OTU_2958	Eukaryota	Alveolata	Dinophyta	Dinophyceae	Suessiales	Suessiales_X	Woloszynskia	Woloszynskia_sp._strain1	0	0	0	0	0	0	0	0	0	0	0	0	0	0	0	0	0	0	0	0	0	0	0	0	0	0	0	0	0	0	0	2	0	0
OTU_2961	Eukaryota	Alveolata	Dinophyta	Dinophyceae	Dinophyceae_X	Dinophyceae_XX	Dinophyceae_XXX	Dinophyceae_XXX_sp.	0	0	0	0	0	0	0	0	0	0	0	0	0	0	0	0	0	0	0	0	0	0	0	0	0	0	2	0	0	0	0	0	0	0
OTU_2963	Eukaryota	Alveolata	Dinophyta	Dinophyceae	Suessiales	Suessiales_X	Suessiales_XX	Suessiales_XX_sp.	0	0	0	0	0	0	0	2	0	0	0	0	0	0	0	0	0	0	0	0	0	0	0	0	0	0	0	0	0	0	0	0	0	0
OTU_2964	Eukaryota	Alveolata	Dinophyta	Dinophyceae	Dinophyceae_X	Dinophyceae_XX	Multi-affiliation	Multi-affiliation	0	0	0	0	0	0	0	0	0	0	0	0	0	0	0	0	0	0	0	0	0	0	0	0	0	0	0	0	0	0	0	0	2	0
OTU_2965	Eukaryota	Alveolata	Dinophyta	Dinophyceae	Suessiales	Suessiales_X	Woloszynskia	Woloszynskia_sp._strain1	0	0	0	0	0	0	0	0	0	0	0	0	2	0	0	0	0	0	0	0	0	0	0	0	0	0	0	0	0	0	0	0	0	0
OTU_2966	Eukaryota	Alveolata	Dinophyta	Dinophyceae	Dinophyceae_X	Dinophyceae_XX	Dinophyceae_XXX	Dinophyceae_XXX_sp.	0	0	0	0	0	0	0	0	0	0	0	0	0	0	0	0	0	0	0	0	0	2	0	0	0	0	0	0	0	0	0	0	0	0
OTU_2967	Eukaryota	Alveolata	Dinophyta	Dinophyceae	Suessiales	Suessiales_X	Suessiales_XX	Suessiales_XX_sp.	0	0	2	0	0	0	0	0	0	0	0	0	0	0	0	0	0	0	0	0	0	0	0	0	0	0	0	0	0	0	0	0	0	0
OTU_2968	Eukaryota	Alveolata	Dinophyta	Dinophyceae	Dinophyceae_X	Dinophyceae_XX	Alexandrium	Multi-affiliation	0	0	0	0	0	0	0	0	0	0	0	0	0	0	0	0	0	0	2	0	0	0	0	0	0	0	0	0	0	0	0	0	0	0
OTU_2970	Eukaryota	Alveolata	Dinophyta	Dinophyceae	Dinophyceae_X	Dinophyceae_XX	Gymnodinium	Gymnodinium_dorsalisulcum	0	0	0	0	0	0	0	0	0	0	0	0	0	0	0	0	0	0	0	0	0	0	0	0	0	0	0	0	0	2	0	0	0	0
OTU_2971	Eukaryota	Alveolata	Dinophyta	Dinophyceae	Suessiales	Suessiales_X	Woloszynskia	Woloszynskia_sp._strain1	2	0	0	0	0	0	0	0	0	0	0	0	0	0	0	0	0	0	0	0	0	0	0	0	0	0	0	0	0	0	0	0	0	0
OTU_2972	Eukaryota	Alveolata	Dinophyta	Dinophyceae	Dinophyceae_X	Pfiesteriaceae	Multi-affiliation	Multi-affiliation	0	0	0	0	0	0	0	0	0	0	0	0	0	0	0	0	0	0	0	0	0	0	0	2	0	0	0	0	0	0	0	0	0	0
OTU_2973	Eukaryota	Alveolata	Dinophyta	Dinophyceae	Suessiales	Suessiales_X	Woloszynskia	Woloszynskia_sp._strain1	0	0	0	0	0	0	0	0	0	0	0	0	0	0	0	0	2	0	0	0	0	0	0	0	0	0	0	0	0	0	0	0	0	0
OTU_2974	Eukaryota	Alveolata	Dinophyta	Dinophyceae	Multi-affiliation	Multi-affiliation	Multi-affiliation	Multi-affiliation	0	2	0	0	0	0	0	0	0	0	0	0	0	0	0	0	0	0	0	0	0	0	0	0	0	0	0	0	0	0	0	0	0	0
OTU_2976	Eukaryota	Alveolata	Dinophyta	Dinophyceae	Dinophyceae_X	Dinophyceae_XX	Dinophyceae_XXX	Dinophyceae_XXX_sp.	0	0	0	0	0	0	0	0	0	0	0	2	0	0	0	0	0	0	0	0	0	0	0	0	0	0	0	0	0	0	0	0	0	0
OTU_2978	Eukaryota	Alveolata	Dinophyta	Dinophyceae	Dinophyceae_X	Dinophyceae_XX	Dinophyceae_XXX	Dinophyceae_XXX_sp.	0	0	0	0	0	0	0	0	0	0	0	0	0	0	0	0	0	0	0	0	0	0	0	0	0	0	0	0	2	0	0	0	0	0
OTU_2981	Eukaryota	Alveolata	Dinophyta	Dinophyceae	Dinophyceae_X	Dinophyceae_XX	Gymnodinium	Gymnodinium_dorsalisulcum	0	0	0	0	0	0	0	0	0	0	0	0	0	0	0	0	0	0	0	0	0	0	0	0	0	0	0	0	0	0	0	0	2	0
OTU_2988	Eukaryota	Alveolata	Dinophyta	Dinophyceae	Suessiales	Suessiales_X	Woloszynskia	Woloszynskia_sp._strain1	1	0	1	0	0	1	0	0	0	0	0	0	0	0	0	0	0	0	0	0	0	0	0	0	1	0	0	0	0	0	0	0	0	0
OTU_2990	Eukaryota	Alveolata	Dinophyta	Syndiniales	Dino-Group-II	Dino-Group-II-Clade-3	Dino-Group-II-Clade-3_X	Multi-affiliation	0	0	0	0	0	1	0	0	0	0	0	0	0	0	0	0	0	0	0	0	0	0	0	0	0	0	0	0	0	0	0	0	0	0
OTU_2991	Eukaryota	Multi-affiliation	Multi-affiliation	Multi-affiliation	Multi-affiliation	Multi-affiliation	Multi-affiliation	Multi-affiliation	0	0	0	0	0	0	0	0	0	0	0	0	0	0	0	0	0	0	0	0	2	0	0	0	0	0	0	0	0	0	0	0	0	0
OTU_2994	Eukaryota	Alveolata	Dinophyta	Dinophyceae	Dinophyceae_X	Pfiesteriaceae	Pfiesteriaceae_X	Pfiesteriaceae_X_sp.	0	0	0	0	0	0	0	0	0	0	0	0	0	0	0	0	0	0	0	0	2	0	0	0	0	0	0	0	0	0	0	0	0	0
OTU_2995	Eukaryota	Alveolata	Dinophyta	Dinophyceae	Suessiales	Suessiales_X	Woloszynskia	Woloszynskia_sp._strain1	0	0	0	0	0	0	0	0	0	0	0	0	2	0	0	0	0	0	0	0	0	0	0	0	0	0	0	0	0	0	0	0	0	0
OTU_2996	Eukaryota	Multi-affiliation	Multi-affiliation	Multi-affiliation	Multi-affiliation	Multi-affiliation	Multi-affiliation	Multi-affiliation	0	0	0	0	0	0	0	1	0	0	0	0	0	0	0	0	0	0	0	0	0	0	0	0	0	0	0	0	0	0	0	0	0	0
OTU_2998	Eukaryota	Alveolata	Dinophyta	Dinophyceae	Suessiales	Suessiales_X	Woloszynskia	Woloszynskia_sp._strain1	0	0	0	0	0	0	0	0	0	0	0	0	0	0	0	0	0	0	0	0	0	0	0	0	0	0	0	0	2	0	0	0	0	0
OTU_2999	Eukaryota	Alveolata	Dinophyta	Dinophyceae	Suessiales	Suessiales_X	Woloszynskia	Woloszynskia_sp._strain1	2	0	0	0	0	0	0	0	0	0	0	0	0	0	0	0	0	0	0	0	0	0	0	0	0	0	0	0	0	0	0	1	0	0
OTU_3000	Eukaryota	Alveolata	Dinophyta	Dinophyceae	Suessiales	Suessiales_X	Woloszynskia	Woloszynskia_sp._strain1	0	0	0	0	0	0	0	0	0	2	0	0	0	0	0	0	0	0	0	0	0	0	0	0	0	0	0	0	0	0	0	0	0	0
OTU_3005	Eukaryota	Alveolata	Dinophyta	Dinophyceae	Suessiales	Suessiales_X	Woloszynskia	Woloszynskia_sp._strain1	0	0	0	0	0	0	0	0	0	0	0	0	2	0	0	0	0	0	0	0	0	0	0	0	0	0	0	0	0	0	0	0	0	0
OTU_3006	Eukaryota	Alveolata	Dinophyta	Dinophyceae	Suessiales	Suessiales_X	Suessiales_XX	Suessiales_XX_sp.	0	0	0	0	0	0	0	0	0	0	0	0	0	0	0	0	0	0	0	0	0	0	0	0	0	0	0	0	0	0	0	0	3	0
OTU_3014	Eukaryota	Opisthokonta	Fungi	Basidiomycota	Agaricomycotina	Dacrymycetes	Multi-affiliation	Multi-affiliation	0	0	0	0	0	0	0	0	0	0	0	0	0	0	0	2	0	0	0	0	0	0	0	0	0	0	0	0	0	0	0	0	0	0
OTU_3022	Eukaryota	Stramenopiles	Ochrophyta	Bacillariophyta	Bacillariophyta_X	Raphid-pennate	Achnanthes	Achnanthes_bongranii	0	0	0	0	0	0	0	0	0	0	0	0	0	0	0	0	0	0	0	0	0	0	0	0	0	0	0	0	0	0	0	0	2	0
OTU_3024	Eukaryota	Stramenopiles	Ochrophyta	Bacillariophyta	Bacillariophyta_X	Araphid-pennate	Multi-affiliation	Multi-affiliation	0	0	0	0	0	3	0	0	0	0	0	0	0	0	0	0	0	0	0	0	0	0	0	0	0	0	0	0	0	0	0	0	0	0
OTU_3034	Eukaryota	Alveolata	Dinophyta	Syndiniales	Dino-Group-II	Dino-Group-II-Clade-32	Dino-Group-II-Clade-32_X	Dino-Group-II-Clade-32_X_sp._strain1	0	0	0	0	0	0	0	0	0	0	0	0	0	0	0	0	0	0	0	0	0	0	0	0	0	0	0	0	0	0	0	0	2	0
OTU_3035	Eukaryota	Alveolata	Dinophyta	Dinophyceae	Dinophyceae_X	Dinophyceae_XX	Dinophyceae_XXX	Dinophyceae_XXX_sp.	0	2	0	0	0	0	0	0	0	0	0	0	0	0	0	0	0	0	0	0	0	0	0	0	0	0	0	0	0	0	0	0	0	0
OTU_3043	Eukaryota	Multi-affiliation	Multi-affiliation	Multi-affiliation	Multi-affiliation	Multi-affiliation	Multi-affiliation	Multi-affiliation	0	0	0	0	0	0	0	0	0	0	0	0	0	0	0	0	0	0	0	0	0	2	0	0	0	0	0	0	0	0	0	0	0	0
OTU_3044	Eukaryota	Alveolata	Dinophyta	Dinophyceae	Suessiales	Suessiales_X	Woloszynskia	Woloszynskia_sp._strain1	0	0	0	0	0	0	0	0	0	0	0	0	0	0	0	0	0	0	0	0	0	0	0	0	0	0	0	0	0	0	0	2	0	0
OTU_3046	Eukaryota	Stramenopiles	Ochrophyta	Bacillariophyta	Bacillariophyta_X	Polar-centric-Mediophyceae	Multi-affiliation	Multi-affiliation	0	0	0	0	0	0	0	0	0	0	0	0	0	0	0	2	0	0	0	0	0	0	0	0	0	0	0	0	0	0	0	0	0	0
OTU_3050	Eukaryota	Stramenopiles	Ochrophyta	Bacillariophyta	Bacillariophyta_X	Polar-centric-Mediophyceae	Cyclotella	Multi-affiliation	0	0	0	0	2	0	0	0	0	0	0	0	0	0	0	0	0	0	0	0	0	0	0	0	0	0	0	0	0	0	0	0	0	0
OTU_3051	Eukaryota	Stramenopiles	Ochrophyta	Bacillariophyta	Bacillariophyta_X	Polar-centric-Mediophyceae	Cyclotella	Multi-affiliation	0	0	0	0	0	2	0	0	0	0	0	0	0	0	0	0	0	0	0	0	0	0	0	0	0	0	0	0	0	0	0	0	0	0
OTU_3052	Eukaryota	Stramenopiles	Ochrophyta	Bacillariophyta	Bacillariophyta_X	Polar-centric-Mediophyceae	Cyclotella	Multi-affiliation	0	0	0	0	0	0	0	0	0	2	0	0	0	0	0	0	0	0	0	0	0	0	0	0	0	0	0	0	0	0	0	0	0	0
OTU_3053	Eukaryota	Stramenopiles	Ochrophyta	Bacillariophyta	Bacillariophyta_X	Polar-centric-Mediophyceae	Cyclotella	Multi-affiliation	0	0	0	0	0	2	0	0	0	0	0	0	0	0	0	0	0	0	0	0	0	0	0	0	0	0	0	0	0	0	0	0	0	0
OTU_3054	Eukaryota	Stramenopiles	Ochrophyta	Bacillariophyta	Bacillariophyta_X	Polar-centric-Mediophyceae	Cyclotella	Multi-affiliation	0	0	0	0	0	0	0	0	0	0	0	0	0	0	0	0	0	0	3	0	0	0	0	0	0	0	0	0	0	0	0	0	0	0
OTU_3055	Eukaryota	Stramenopiles	Ochrophyta	Bacillariophyta	Bacillariophyta_X	Polar-centric-Mediophyceae	Cyclotella	Multi-affiliation	0	0	0	0	0	0	0	0	0	0	0	0	0	0	2	0	0	0	0	0	0	0	0	0	0	0	0	0	0	0	0	0	0	0
OTU_3056	Eukaryota	Alveolata	Dinophyta	Dinophyceae	Multi-affiliation	Multi-affiliation	Multi-affiliation	Multi-affiliation	0	0	0	0	0	0	0	0	0	0	0	0	0	0	0	0	0	0	0	0	0	0	0	0	0	0	0	0	0	0	0	0	2	0
OTU_3057	Eukaryota	Stramenopiles	Ochrophyta	Bacillariophyta	Bacillariophyta_X	Polar-centric-Mediophyceae	Cyclotella	Multi-affiliation	0	0	0	0	0	0	0	0	0	2	0	0	0	0	0	0	0	0	0	0	0	0	0	0	0	0	0	0	0	0	0	0	0	0
OTU_3061	Eukaryota	Stramenopiles	Ochrophyta	Bacillariophyta	Bacillariophyta_X	Polar-centric-Mediophyceae	Multi-affiliation	Multi-affiliation	0	0	0	0	0	0	0	0	0	0	0	0	0	0	2	0	0	0	0	0	0	0	0	0	0	0	0	0	0	0	0	0	0	0
OTU_3067	Eukaryota	Stramenopiles	Ochrophyta	Bacillariophyta	Bacillariophyta_X	Polar-centric-Mediophyceae	Multi-affiliation	Multi-affiliation	0	0	0	0	0	0	0	0	0	0	0	0	0	0	0	0	0	0	0	0	0	0	0	2	0	0	0	0	0	0	0	0	0	0
OTU_3068	Eukaryota	Stramenopiles	Ochrophyta	Bacillariophyta	Bacillariophyta_X	Polar-centric-Mediophyceae	Multi-affiliation	Multi-affiliation	0	0	0	0	0	0	0	0	0	0	0	0	0	0	0	2	0	0	0	0	0	0	0	0	0	0	0	0	0	0	0	0	0	0
OTU_3071	Eukaryota	Stramenopiles	Ochrophyta	Bacillariophyta	Bacillariophyta_X	Polar-centric-Mediophyceae	Multi-affiliation	Multi-affiliation	0	0	0	0	0	0	0	0	0	0	0	0	0	0	0	1	0	0	0	0	0	0	0	0	0	0	0	0	0	0	0	0	0	0
OTU_3072	Eukaryota	Stramenopiles	Ochrophyta	Bacillariophyta	Bacillariophyta_X	Polar-centric-Mediophyceae	Multi-affiliation	Multi-affiliation	0	0	0	0	0	0	0	0	0	0	0	0	0	0	0	2	0	0	0	0	0	0	0	0	0	0	0	0	0	0	0	0	0	0
OTU_3074	Eukaryota	Stramenopiles	Ochrophyta	Bacillariophyta	Bacillariophyta_X	Polar-centric-Mediophyceae	Multi-affiliation	Multi-affiliation	0	0	0	0	0	0	0	0	0	0	0	0	0	0	0	2	0	0	0	0	0	0	0	0	0	0	0	0	0	0	0	0	0	0
OTU_3075	Eukaryota	Stramenopiles	Ochrophyta	Bacillariophyta	Bacillariophyta_X	Polar-centric-Mediophyceae	Multi-affiliation	Multi-affiliation	0	0	0	0	0	0	0	0	0	0	0	0	0	0	0	2	0	0	0	0	0	0	0	0	0	0	0	0	0	0	0	0	0	0
OTU_3076	Eukaryota	Stramenopiles	Ochrophyta	Bacillariophyta	Bacillariophyta_X	Polar-centric-Mediophyceae	Multi-affiliation	Multi-affiliation	0	0	0	0	0	0	0	0	0	0	0	0	0	0	0	2	0	0	0	0	0	0	0	0	0	0	0	0	0	0	0	0	0	0
OTU_3077	Eukaryota	Alveolata	Apicomplexa	Apicomplexa_X	Coccidia	Eimeriidae	Goussia	Multi-affiliation	0	0	0	0	1	1	0	0	0	0	0	0	0	0	0	0	0	0	0	0	0	0	0	0	0	0	0	0	0	0	0	0	0	0
OTU_3082	Eukaryota	Rhizaria	Cercozoa	Filosa-Thecofilosea	Cryomonadida	Cryothecomonas-lineage	Cryothecomonas	Multi-affiliation	0	0	0	0	0	0	0	0	0	0	0	0	0	0	2	0	0	0	0	0	0	0	0	0	0	0	0	0	0	0	0	0	0	0
OTU_3332	Eukaryota	Stramenopiles	Stramenopiles_X	Pirsonia_Clade	Pirsonia_Clade_X	Pirsonia_Clade_XX	Pirsonia	Pirsonia_verrucosa	0	0	0	0	0	0	0	0	0	0	0	0	0	0	0	0	2	0	0	0	0	0	0	0	0	0	0	0	0	0	0	0	0	0
OTU_3345	Eukaryota	Rhizaria	Cercozoa	Filosa-Thecofilosea	Filosa-Thecofilosea_X	Filosa-Thecofilosea_XX	Filosa-Thecofilosea_XXX	Filosa-Thecofilosea_XXX_sp.	0	0	0	0	0	0	0	0	0	0	0	0	0	0	0	0	0	0	0	0	0	0	2	0	0	0	0	0	0	0	0	0	0	0
OTU_3347	Eukaryota	Rhizaria	Cercozoa	Filosa-Thecofilosea	Cryomonadida	Protaspa-lineage	Protaspa	Protaspa_obliqua	0	1	0	0	0	0	0	0	0	0	0	0	0	0	0	0	0	0	0	0	0	0	0	0	0	0	0	0	0	0	0	0	0	0
OTU_3379	Eukaryota	Rhizaria	Cercozoa	Filosa-Thecofilosea	Cryomonadida	Protaspa-lineage	Protaspa-lineage_X	Protaspa-lineage_X_sp.	3	0	0	0	0	0	0	0	0	0	0	0	0	0	0	0	0	0	0	0	0	0	0	0	0	0	0	0	0	0	0	0	0	0
OTU_3380	Eukaryota	Rhizaria	Cercozoa	Filosa-Thecofilosea	Cryomonadida	Protaspa-lineage	Protaspa-lineage_X	Protaspa-lineage_X_sp.	0	0	0	0	0	0	0	0	0	0	0	0	0	0	0	0	0	0	0	0	0	0	0	0	0	2	0	0	0	0	0	0	0	0
OTU_3385	Eukaryota	Alveolata	Dinophyta	Dinophyceae	Suessiales	Suessiales_X	Woloszynskia	Woloszynskia_sp._strain1	0	0	0	0	0	0	0	0	0	0	0	0	0	0	0	0	0	0	0	0	0	0	0	0	0	0	0	0	0	0	2	0	0	0
OTU_3388	Eukaryota	Stramenopiles	Stramenopiles_X	Labyrinthulea	Multi-affiliation	Multi-affiliation	Multi-affiliation	Multi-affiliation	0	0	0	0	0	0	0	0	0	0	0	0	0	0	0	0	0	0	0	0	0	0	0	3	0	0	0	0	0	0	0	0	0	0
OTU_3406	Eukaryota	Stramenopiles	Ochrophyta	Phaeophyceae	Phaeophyceae_X	Phaeophyceae_XX	Fucus	Multi-affiliation	0	0	0	0	0	0	0	0	0	0	3	0	0	0	0	0	0	0	0	0	0	0	0	0	0	0	0	0	0	0	0	0	0	0
OTU_3410	Eukaryota	Alveolata	Dinophyta	Dinophyceae	Dinophyceae_X	Dinophyceae_XX	Alexandrium	Multi-affiliation	0	0	0	0	0	0	0	0	0	0	0	0	0	0	0	0	0	1	0	0	0	0	0	1	0	0	0	0	0	0	0	0	0	0
OTU_3505	Eukaryota	Stramenopiles	Stramenopiles_X	Bicoecea	Anoecales	Caecitellaceae	Caecitellus	Caecitellus_parvulus	0	0	0	0	0	0	0	0	0	0	0	0	0	0	0	0	0	0	0	2	0	0	0	0	0	0	0	0	0	0	0	0	0	0
OTU_3506	Eukaryota	Alveolata	Dinophyta	Dinophyceae	Suessiales	Suessiales_X	Woloszynskia	Woloszynskia_sp._strain1	0	0	0	0	0	0	0	0	0	0	0	0	0	0	0	0	0	2	0	0	0	0	0	0	0	0	0	0	0	0	0	0	0	0
OTU_3509	Eukaryota	Apusozoa	Apusomonadidae	Apusomonadidae_Group-1	Apusomonadidae_Group-1_X	Apusomonadidae_Group-1_XX	Apusomonadidae_Group-1_XXX	Apusomonadidae_Group-1_XXX_sp._strain1	0	0	0	0	0	0	0	0	0	0	0	0	0	0	0	0	0	0	0	0	0	0	4	0	0	0	0	0	0	0	0	0	0	0
OTU_3511	Eukaryota	Stramenopiles	Ochrophyta	Phaeophyceae	Phaeophyceae_X	Phaeophyceae_XX	Silvetia	Silvetia_siliquosa	0	0	0	0	0	0	0	0	0	0	0	0	0	0	0	0	0	0	0	0	0	0	2	0	0	0	0	0	0	0	0	0	0	0
OTU_3552	Eukaryota	Alveolata	Ciliophora	Phyllopharyngea	Phyllopharyngea_X	Phyllopharyngea_XX	Phyllopharyngea_XXX	Phyllopharyngea_XXX_sp.	0	0	0	0	0	0	1	0	1	0	0	0	0	0	0	0	0	0	0	0	0	0	0	0	0	0	0	0	0	0	0	0	0	0
OTU_3558	Eukaryota	Alveolata	Ciliophora	Phyllopharyngea	Phyllopharyngea_X	Phyllopharyngea_XX	Phyllopharyngea_XXX	Phyllopharyngea_XXX_sp.	0	0	0	0	0	0	2	0	0	0	0	0	0	0	0	0	0	0	0	0	0	0	0	0	0	0	0	0	0	0	0	0	0	0
OTU_3791	Eukaryota	Alveolata	Ciliophora	Phyllopharyngea	Suctoria	Paracinetidae	Paracineta	Paracineta_limbata	0	0	0	0	0	0	0	0	0	0	0	0	0	0	0	0	0	0	0	2	0	0	0	0	0	0	0	0	0	0	0	0	0	0
OTU_3805	Eukaryota	Alveolata	Ciliophora	Phyllopharyngea	Suctoria	Paracinetidae	Paracineta	Paracineta_limbata	0	0	0	0	0	0	0	0	0	0	0	0	0	0	0	0	0	0	0	0	0	0	0	0	0	0	0	0	2	0	0	0	0	0
OTU_3808	Eukaryota	Alveolata	Apicomplexa	Apicomplexa_X	Novel-Apicomplexa-Class-1	Novel-Apicomplexa-Class-1_X	Novel-Apicomplexa-Class-1_XX	Novel-Apicomplexa-Class-1_XX_sp.	0	0	0	0	0	0	0	0	0	0	0	0	0	0	0	0	0	0	0	0	0	0	0	2	0	0	0	0	0	0	0	0	0	0
OTU_3825	Eukaryota	Alveolata	Ciliophora	Phyllopharyngea	Suctoria	Suctoria_X	Suctoria_XX	Suctoria_XX_sp.	0	0	0	0	0	0	2	0	0	0	0	0	0	0	0	0	0	0	0	0	0	0	0	0	0	0	0	0	0	0	0	0	0	0
OTU_3831	Eukaryota	Alveolata	Ciliophora	Multi-affiliation	Multi-affiliation	Multi-affiliation	Multi-affiliation	Multi-affiliation	0	0	0	0	0	0	0	0	0	0	0	2	0	0	0	0	0	0	0	0	0	0	0	0	0	0	0	0	0	0	0	0	0	0
OTU_3873	Eukaryota	Alveolata	Ciliophora	Oligohymenophorea	Mobilida	Trichodinidae	Trichodina	Trichodina_ruditapicis	0	0	0	0	0	0	0	0	0	0	0	2	0	0	0	0	0	0	0	0	0	0	0	0	0	0	0	0	0	0	0	0	0	0
OTU_3891	Eukaryota	Alveolata	Ciliophora	Litostomatea	Haptoria	Litonotidae	Litonotidae_X	Litonotidae_X_sp.	2	0	0	0	0	0	0	0	0	0	0	0	0	0	0	0	0	0	0	0	0	0	0	0	0	0	0	0	0	0	0	0	0	0
OTU_3914	Eukaryota	Alveolata	Ciliophora	Oligohymenophorea	Mobilida	Trichodinidae	Trichodina	Trichodina_ruditapicis	0	0	0	0	0	0	0	0	0	0	0	0	0	0	0	0	0	0	0	0	0	0	0	0	0	0	0	0	0	0	0	0	0	2
OTU_3930	Eukaryota	Alveolata	Ciliophora	Oligohymenophorea	Mobilida	Trichodinidae	Trichodina	Trichodina_ruditapicis	0	0	2	0	0	0	0	0	0	0	0	0	0	0	0	0	0	0	0	0	0	0	0	0	0	0	0	0	0	0	0	0	0	0
OTU_4010	Eukaryota	Alveolata	Ciliophora	Oligohymenophorea	Mobilida	Trichodinidae	Trichodina	Trichodina_ruditapicis	0	0	1	0	0	0	0	0	0	0	0	0	0	0	0	0	0	0	0	0	0	0	0	0	0	0	0	0	0	0	0	0	0	0
OTU_4012	Eukaryota	Alveolata	Ciliophora	Oligohymenophorea	Mobilida	Trichodinidae	Trichodina	Trichodina_ruditapicis	0	0	1	0	0	0	0	0	0	0	0	1	0	0	0	0	0	0	0	0	0	0	0	0	0	0	0	0	0	0	0	0	0	0
OTU_4018	Eukaryota	Alveolata	Ciliophora	Oligohymenophorea	Mobilida	Trichodinidae	Trichodina	Trichodina_ruditapicis	2	0	0	0	0	0	0	0	0	0	0	1	0	0	0	0	0	0	0	0	0	0	0	0	0	0	0	0	0	0	0	0	0	0
OTU_4350	Eukaryota	Alveolata	Ciliophora	Oligohymenophorea	Mobilida	Trichodinidae	Trichodina	Trichodina_ruditapicis	0	0	0	0	0	0	0	0	0	0	0	2	0	0	0	0	0	0	0	0	0	0	0	0	0	0	0	0	0	0	0	0	0	0
OTU_6342	Eukaryota	Alveolata	Ciliophora	Phyllopharyngea	Cyrtophoria	Dysteriidae	Dysteria	Multi-affiliation	0	0	0	0	0	0	1	0	0	0	0	0	0	0	0	0	0	0	0	0	0	0	1	0	0	0	0	0	0	0	0	0	0	0
OTU_6386	Eukaryota	Stramenopiles	Stramenopiles_X	Labyrinthulea	Thraustochytriales	Thraustochytriaceae	Thraustochytriaceae_X	Thraustochytriaceae_X_sp.	0	0	0	0	0	0	0	0	0	0	0	0	0	0	0	0	0	0	0	0	0	0	0	1	0	0	0	0	0	0	0	0	0	0
OTU_8612	Eukaryota	Alveolata	Dinophyta	Dinophyceae	Dinophyceae_X	Dinophyceae_XX	Dinophyceae_XXX	Dinophyceae_XXX_sp.	0	0	0	0	0	0	0	0	0	0	0	0	0	0	0	0	0	0	0	0	0	0	0	0	0	2	0	0	0	0	0	0	0	0
OTU_8637	Eukaryota	Alveolata	Apicomplexa	Apicomplexa_X	Apicomplexa_XX	Apicomplexa_XXX	Apicomplexa_XXXX	Apicomplexa_XXXX_sp.	0	0	0	0	0	0	0	0	0	0	0	0	0	0	0	0	0	0	0	0	0	0	0	0	2	0	0	0	0	0	0	0	0	0
OTU_11153	Eukaryota	Alveolata	Ciliophora	Oligohymenophorea	Sessilida	Vorticellidae	Vorticellidae_X	Vorticellidae_X_sp.	0	0	0	0	0	0	0	0	0	0	0	0	0	0	0	0	0	0	0	0	0	0	1	0	0	0	0	0	0	0	0	0	0	0
OTU_11675	Eukaryota	Alveolata	Dinophyta	Dinophyceae	Dinophyceae_X	Ostreopsidaceae	Coolia	Coolia_monotis	0	0	0	0	0	0	0	0	0	0	0	0	0	0	0	0	0	0	0	0	0	0	0	0	0	0	0	0	2	0	0	0	0	0
OTU_11724	Eukaryota	Alveolata	Dinophyta	Dinophyceae	Dinophyceae_X	Dinophyceae_XX	Dinophyceae_XXX	Dinophyceae_XXX_sp.	0	0	0	0	0	0	0	0	0	0	0	0	0	0	0	0	0	0	0	2	0	0	0	0	0	0	0	0	0	0	0	0	0	0
OTU_11800	Eukaryota	Alveolata	Ciliophora	Spirotrichea	Choreotrichia	Tintinnidae	Multi-affiliation	Multi-affiliation	0	0	0	0	0	2	0	0	0	0	0	0	0	0	0	0	0	0	0	0	0	0	0	0	0	0	0	0	0	0	0	0	0	0
OTU_11809	Eukaryota	Stramenopiles	Ochrophyta	Bacillariophyta	Bacillariophyta_X	Raphid-pennate	Entomoneis	Entomoneis_ornata	0	0	0	0	0	0	0	0	0	0	0	0	0	0	0	0	0	0	1	0	0	0	0	0	0	0	0	0	0	0	0	0	0	0
OTU_12014	Eukaryota	Alveolata	Ciliophora	Spirotrichea	Hypotrichia	Hypotrichia_X	Hypotrichia_XX	Hypotrichia_XX_sp.	0	0	0	0	0	0	0	0	0	0	0	0	0	0	0	0	0	0	0	0	0	0	0	0	0	0	0	0	0	0	0	2	0	0
OTU_12016	Eukaryota	Stramenopiles	Stramenopiles_X	Labyrinthulea	Thraustochytriales	Thraustochytriaceae	Thraustochytriaceae_X	Thraustochytriaceae_X_sp.	0	0	0	0	0	0	0	0	0	0	0	0	0	0	0	0	0	0	4	0	0	0	0	0	0	0	0	0	0	0	0	0	0	0
OTU_12616	Eukaryota	Amoebozoa	Lobosa	Tubulinea	Leptomyxida	Flabellulidae	Paraflabellula	Paraflabellula_sp.	0	2	0	0	0	0	0	0	0	0	0	0	0	0	0	0	0	0	0	0	0	0	0	0	0	0	0	0	0	0	0	0	0	0
OTU_12705	Eukaryota	Alveolata	Dinophyta	Dinophyceae	Dinophyceae_X	Dinophyceae_XX	Dinophyceae_XXX	Dinophyceae_XXX_sp.	0	0	0	0	0	0	0	0	0	0	0	0	0	0	0	0	0	0	0	0	0	3	0	0	0	0	0	0	0	0	0	0	0	0
OTU_12840	Eukaryota	Alveolata	Dinophyta	Dinophyceae	Dinophyceae_X	Dinophyceae_XX	Dinophyceae_XXX	Dinophyceae_XXX_sp.	0	0	0	0	0	0	0	0	0	0	0	0	0	0	0	0	0	0	0	0	0	0	0	0	0	0	2	0	0	0	0	0	0	0
OTU_12988	Eukaryota	Archaeplastida	Rhodophyta	Stylonematophyceae	Porphyridiales-2	Stylonematales-Group-I	Chroodactylon	Chroodactylon_ornatum	0	0	2	0	0	0	0	0	0	0	0	0	0	0	0	0	0	0	0	0	0	0	0	0	0	0	0	0	0	0	0	0	0	0
OTU_12993	Eukaryota	Multi-affiliation	Multi-affiliation	Multi-affiliation	Multi-affiliation	Multi-affiliation	Multi-affiliation	Multi-affiliation	0	0	0	0	0	0	0	0	0	0	0	0	0	0	0	0	0	2	0	0	0	0	0	0	0	0	0	0	0	0	0	0	0	0
OTU_13642	Eukaryota	Opisthokonta	Mesomycetozoa	Ichthyosporea	Ichthyosphonida	Pseudoperkinsidae	Pseudoperkinsus	Pseudoperkinsus_tapetis	0	0	0	0	0	0	0	0	0	0	0	0	0	0	0	0	0	0	0	0	0	0	0	0	0	0	0	0	0	0	0	0	2	0
OTU_13657	Eukaryota	Alveolata	Apicomplexa	Apicomplexa_X	Colpodellidae	Colpodellidae_X	Colpodellidae_XX	Colpodellidae_XX_sp.	0	0	0	0	0	0	0	0	0	0	0	0	0	0	0	0	2	0	0	0	0	0	0	0	0	0	0	0	0	0	0	0	0	0
OTU_16437	Eukaryota	Archaeplastida	Chlorophyta	Ulvophyceae	Ulvales-relatives	Ulvales-relatives_X	Blidingia	Blidingia_dawsonii	0	0	0	0	0	0	0	0	0	0	0	0	0	0	2	0	0	0	0	0	0	0	0	0	0	0	0	0	0	0	0	0	0	0
OTU_16468	Eukaryota	Archaeplastida	Chlorophyta	Ulvophyceae	Ulvales-relatives	Ulvales-relatives_X	Blidingia	Blidingia_dawsonii	0	0	0	0	0	0	0	0	0	0	0	0	0	0	0	0	0	0	0	0	0	0	0	5	0	0	0	0	0	0	0	0	0	0
OTU_16494	Eukaryota	Archaeplastida	Chlorophyta	Ulvophyceae	Ulvales-relatives	Ulvales-relatives_X	Blidingia	Blidingia_dawsonii	0	0	0	0	2	0	0	0	0	0	0	0	0	0	0	0	0	0	0	0	0	0	0	0	0	0	0	0	0	0	0	0	0	0
OTU_16576	Eukaryota	Archaeplastida	Chlorophyta	Ulvophyceae	Ulotrichales	Ulotrichales_X	Trichosarcina	Trichosarcina_sp.	0	0	0	0	0	0	0	0	0	0	0	0	0	0	0	0	0	0	0	0	0	0	0	0	0	0	0	0	3	0	0	0	0	0
OTU_17709	Eukaryota	Amoebozoa	Conosa	Mycetozoa-Myxogastrea	Trichiales	Trichiaceae	Arcyria	Arcyria_nigella	0	0	0	0	0	0	0	0	0	0	0	0	0	0	0	0	0	0	0	0	0	0	0	0	0	2	0	0	0	0	0	0	0	0
OTU_18839	Eukaryota	Alveolata	Dinophyta	Syndiniales	Dino-Group-I	Dino-Group-I-Clade-4	Euduboscquella	Euduboscquella_crenulata	0	0	0	0	0	0	0	0	0	0	0	0	0	0	0	0	0	3	0	0	0	0	0	0	0	0	0	0	0	0	0	0	0	0
OTU_19394	Eukaryota	Alveolata	Dinophyta	Dinophyceae	Dinophyceae_X	Dinophyceae_XX	Dinophyceae_XXX	Dinophyceae_XXX_sp.	0	0	0	0	0	0	0	0	0	0	0	0	0	0	2	0	0	0	0	0	0	0	0	0	0	0	0	0	0	0	0	0	0	0
OTU_19666	Eukaryota	Archaeplastida	Chlorophyta	Ulvophyceae	Ulotrichales	Ulotrichales_X	Pseudendoclonium	Pseudendoclonium_akinetum	0	0	0	0	0	0	4	0	0	0	0	0	0	0	0	0	0	0	0	0	0	0	0	0	0	0	0	0	0	0	0	0	0	0
OTU_19791	Eukaryota	Archaeplastida	Chlorophyta	Ulvophyceae	Ulvales-relatives	Ulvales-relatives_X	Ulva	Ulva_intestinalis	0	0	0	0	0	0	0	0	0	0	0	0	0	0	0	0	0	0	0	0	0	0	0	1	0	0	0	0	1	0	0	0	0	0
OTU_20151	Eukaryota	Alveolata	Dinophyta	Dinophyceae	Dinophyceae_X	Ostreopsidaceae	Coolia	Coolia_monotis	0	0	0	0	0	0	0	0	0	0	0	0	0	0	0	0	0	0	0	0	2	0	0	0	0	0	0	0	0	0	0	0	0	0
OTU_20254	Eukaryota	Alveolata	Dinophyta	Dinophyceae	Dinophyceae_X	Ostreopsidaceae	Coolia	Coolia_monotis	0	0	0	2	0	0	0	0	0	0	0	0	0	0	0	0	0	0	0	0	0	0	0	0	0	0	0	0	0	0	0	0	0	0
OTU_21415	Eukaryota	Alveolata	Dinophyta	Dinophyceae	Dinophyceae_X	Dinophyceae_XX	Dinophyceae_XXX	Multi-affiliation	0	0	0	0	0	0	0	2	0	0	0	0	0	0	0	0	0	0	0	0	0	0	0	0	0	0	0	0	0	0	0	0	0	0
OTU_21454	Eukaryota	Opisthokonta	Choanoflagellida	Choanoflagellatea	Craspedida	Monosigidae_Group_M	Salpingoeca_M	Salpingoeca_urceolata	0	0	0	0	0	0	0	0	0	0	0	0	0	0	0	0	0	0	0	0	1	0	0	0	0	0	0	0	0	0	0	0	0	0
OTU_21953	Eukaryota	Alveolata	Dinophyta	Syndiniales	Dino-Group-II	Dino-Group-II-Clade-1	Dino-Group-II-Clade-1_X	Multi-affiliation	3	0	0	0	0	0	0	0	0	0	0	0	0	0	0	0	0	0	0	0	0	0	0	0	0	0	0	0	0	0	0	0	0	0
OTU_22529	Eukaryota	Alveolata	Dinophyta	Dinophyceae	Suessiales	Suessiales_X	Woloszynskia	Woloszynskia_sp._strain1	0	0	0	0	0	0	1	0	0	1	0	0	0	0	0	0	0	0	0	0	0	0	0	0	0	0	0	0	0	0	0	0	0	0
OTU_22530	Eukaryota	Alveolata	Dinophyta	Dinophyceae	Suessiales	Suessiales_X	Woloszynskia	Woloszynskia_sp._strain1	0	0	0	0	0	0	0	0	0	0	0	0	0	0	0	0	0	0	0	0	0	0	0	0	0	2	0	0	0	0	0	0	0	0
OTU_22566	Eukaryota	Alveolata	Dinophyta	Dinophyceae	Multi-affiliation	Multi-affiliation	Multi-affiliation	Multi-affiliation	0	0	0	0	0	0	0	0	0	0	0	0	0	0	0	0	0	0	0	0	0	0	0	0	2	0	0	0	0	0	0	0	0	0
OTU_22787	Eukaryota	Alveolata	Dinophyta	Dinophyceae	Suessiales	Suessiales_X	Woloszynskia	Woloszynskia_sp._strain1	0	0	0	0	0	0	0	0	0	0	0	0	0	0	0	0	0	0	0	0	0	0	0	0	2	0	0	0	0	0	0	0	0	0
OTU_22825	Eukaryota	Alveolata	Dinophyta	Dinophyceae	Dinophyceae_X	Dinophyceae_XX	Dinophyceae_XXX	Dinophyceae_XXX_sp.	3	0	0	0	0	0	0	0	0	0	0	0	0	0	0	0	0	0	0	0	0	0	0	0	0	0	0	0	0	0	0	0	0	0
OTU_23225	Eukaryota	Alveolata	Dinophyta	Dinophyceae	Dinophyceae_X	Dinophyceae_XX	Protoperidinium	Multi-affiliation	0	0	0	0	0	2	0	0	0	0	0	0	0	0	0	0	0	0	0	0	0	0	0	0	0	0	0	0	0	0	0	0	0	0
OTU_34738	Eukaryota	Multi-affiliation	Multi-affiliation	Multi-affiliation	Multi-affiliation	Multi-affiliation	Multi-affiliation	Multi-affiliation	0	0	0	0	0	0	0	0	0	0	0	0	0	0	0	0	0	0	0	0	1	0	0	0	0	0	0	0	0	0	0	0	0	0
OTU_34765	Eukaryota	Opisthokonta	Fungi	Basidiomycota	Agaricomycotina	Tremellomycetes	Tremellomycetes_X	Tremellomycetes_X_sp.	0	0	0	0	0	0	0	0	0	0	0	0	0	0	0	0	0	2	0	0	0	0	0	0	0	0	0	0	0	0	0	0	0	0
OTU_35798	Eukaryota	Multi-affiliation	Multi-affiliation	Multi-affiliation	Multi-affiliation	Multi-affiliation	Multi-affiliation	Multi-affiliation	0	0	0	0	0	0	0	0	0	0	0	0	0	0	0	0	0	0	1	0	0	0	0	0	0	0	0	0	1	0	0	0	0	0
OTU_35818	Eukaryota	Alveolata	Dinophyta	Dinophyceae	Dinophyceae_X	Dinophyceae_XX	Gymnodinium	Gymnodinium_dorsalisulcum	0	0	0	0	0	0	0	0	0	0	0	0	0	0	0	0	0	0	0	0	0	1	0	0	0	0	0	0	1	0	0	0	0	1
OTU_35834	Eukaryota	Alveolata	Dinophyta	Dinophyceae	Suessiales	Suessiales_X	Woloszynskia	Woloszynskia_sp._strain1	0	0	0	0	0	0	0	0	1	0	0	0	0	0	0	0	0	0	0	0	0	0	0	0	1	0	0	0	0	0	0	0	0	0
OTU_36072	Eukaryota	Multi-affiliation	Multi-affiliation	Multi-affiliation	Multi-affiliation	Multi-affiliation	Multi-affiliation	Multi-affiliation	0	0	0	0	0	0	0	0	0	0	0	0	0	0	0	0	0	0	0	0	1	0	0	0	0	0	0	0	0	0	0	0	0	0
OTU_36188	Eukaryota	Alveolata	Dinophyta	Dinophyceae	Suessiales	Suessiales_X	Suessiales_XX	Suessiales_XX_sp.	0	1	0	0	0	0	0	0	0	0	0	0	0	0	0	0	0	0	0	0	1	0	0	0	0	0	0	0	0	0	0	0	0	0
OTU_36452	Eukaryota	Alveolata	Dinophyta	Dinophyceae	Dinophyceae_X	Dinophyceae_XX	Gymnodinium	Gymnodinium_dorsalisulcum	0	0	0	0	0	0	0	0	2	0	0	0	0	0	0	0	0	0	0	0	0	0	0	0	0	0	0	0	0	0	0	0	0	0
OTU_36455	Eukaryota	Alveolata	Dinophyta	Dinophyceae	Suessiales	Suessiales_X	Suessiales_XX	Suessiales_XX_sp.	0	2	0	0	0	0	0	0	0	0	0	0	0	0	0	0	0	0	0	0	0	0	0	0	0	0	0	0	0	0	0	0	0	0
OTU_36646	Eukaryota	Alveolata	Dinophyta	Dinophyceae	Suessiales	Suessiales_X	Woloszynskia	Woloszynskia_sp._strain1	0	0	0	0	0	2	0	0	0	1	0	0	1	0	0	0	0	0	0	0	0	0	0	0	0	0	0	0	0	0	0	0	0	0
OTU_36673	Eukaryota	Alveolata	Dinophyta	Dinophyceae	Suessiales	Suessiales_X	Woloszynskia	Woloszynskia_sp._strain1	0	0	0	0	0	0	0	0	0	0	0	0	2	0	0	0	0	0	0	0	0	0	0	0	0	0	0	0	0	0	0	0	0	0
OTU_36681	Eukaryota	Alveolata	Dinophyta	Dinophyceae	Dinophyceae_X	Dinophyceae_XX	Dinophyceae_XXX	Dinophyceae_XXX_sp.	0	0	0	0	0	0	0	0	0	0	0	0	0	0	0	0	0	0	0	0	0	0	0	0	0	0	0	0	2	0	0	0	0	0
OTU_37007	Eukaryota	Alveolata	Dinophyta	Dinophyceae	Suessiales	Suessiales_X	Woloszynskia	Woloszynskia_sp._strain1	0	0	0	2	0	0	0	0	0	0	0	0	0	0	0	0	0	0	0	0	0	0	0	0	0	0	0	0	0	0	0	0	0	0
OTU_37037	Eukaryota	Multi-affiliation	Multi-affiliation	Multi-affiliation	Multi-affiliation	Multi-affiliation	Multi-affiliation	Multi-affiliation	0	0	0	0	0	0	0	2	0	0	0	0	0	0	0	0	0	0	0	0	0	0	0	0	0	0	0	0	0	0	0	0	0	0
OTU_37304	Eukaryota	Alveolata	Dinophyta	Dinophyceae	Dinophyceae_X	Pfiesteriaceae	Multi-affiliation	Multi-affiliation	0	0	0	0	0	0	0	0	0	1	0	0	0	0	0	0	0	0	0	0	0	0	0	0	0	0	0	0	0	2	0	0	0	0
OTU_37447	Eukaryota	Alveolata	Dinophyta	Dinophyceae	Suessiales	Suessiales_X	Woloszynskia	Woloszynskia_sp._strain1	0	0	0	1	0	0	0	0	0	0	0	0	0	0	0	0	0	0	0	0	0	0	0	0	0	0	0	1	0	0	0	0	0	0
OTU_37484	Eukaryota	Alveolata	Dinophyta	Dinophyceae	Dinophyceae_X	Dinophyceae_XX	Durinskia	Durinskia_baltica	0	0	0	0	0	2	0	0	0	0	0	0	0	0	0	0	0	0	0	0	0	0	0	0	0	0	0	0	0	0	0	0	0	0
OTU_37524	Eukaryota	Alveolata	Dinophyta	Dinophyceae	Dinophyceae_X	Dinophyceae_XX	Dinophyceae_XXX	Dinophyceae_XXX_sp.	0	0	0	0	0	0	0	0	0	0	0	0	0	0	0	0	0	0	0	5	0	0	0	0	0	0	0	0	0	0	0	0	0	0
OTU_37531	Eukaryota	Alveolata	Dinophyta	Dinophyceae	Dinophyceae_X	Dinophyceae_XX	Dinophyceae_XXX	Dinophyceae_XXX_sp.	0	0	0	0	0	0	0	0	0	0	0	0	0	0	0	0	0	0	0	0	0	0	0	0	0	0	0	0	2	0	0	0	0	0
OTU_37601	Eukaryota	Alveolata	Dinophyta	Dinophyceae	Dinophyceae_X	Dinophyceae_XX	Dinophyceae_XXX	Dinophyceae_XXX_sp.	0	0	0	0	0	0	0	0	0	0	0	0	0	0	0	0	0	0	0	0	0	0	0	0	0	0	0	0	2	0	0	0	0	0
OTU_37787	Eukaryota	Alveolata	Dinophyta	Dinophyceae	Suessiales	Suessiales_X	Woloszynskia	Woloszynskia_sp._strain1	0	0	0	0	0	0	0	0	0	0	0	0	1	0	0	0	0	0	0	0	0	0	0	0	0	0	0	0	0	0	0	0	0	0
OTU_38165	Eukaryota	Multi-affiliation	Multi-affiliation	Multi-affiliation	Multi-affiliation	Multi-affiliation	Multi-affiliation	Multi-affiliation	0	0	0	0	0	0	0	0	0	0	0	0	1	0	0	0	0	0	0	0	0	0	0	0	0	0	0	1	0	0	0	0	0	0
OTU_38168	Eukaryota	Multi-affiliation	Multi-affiliation	Multi-affiliation	Multi-affiliation	Multi-affiliation	Multi-affiliation	Multi-affiliation	0	2	0	0	0	0	0	0	0	0	0	0	0	0	0	0	0	0	0	0	0	0	0	0	0	0	0	0	0	0	0	0	0	0
OTU_38172	Eukaryota	Alveolata	Dinophyta	Dinophyceae	Suessiales	Suessiales_X	Multi-affiliation	Multi-affiliation	0	0	0	0	0	0	0	0	0	0	2	0	0	0	0	0	0	0	0	0	0	0	0	0	0	0	0	0	0	0	0	0	0	0
OTU_38207	Eukaryota	Alveolata	Dinophyta	Dinophyceae	Suessiales	Suessiales_X	Woloszynskia	Woloszynskia_sp._strain1	0	0	0	0	0	0	0	0	0	0	0	0	0	0	0	0	0	0	0	0	2	0	0	0	0	0	0	0	0	0	0	0	0	0
OTU_38211	Eukaryota	Alveolata	Dinophyta	Dinophyceae	Suessiales	Suessiales_X	Woloszynskia	Woloszynskia_sp._strain1	0	0	0	0	0	0	0	0	1	0	0	0	0	0	0	0	0	0	0	1	0	0	0	0	0	0	0	0	0	0	0	0	0	0
OTU_38447	Eukaryota	Alveolata	Dinophyta	Dinophyceae	Suessiales	Suessiales_X	Woloszynskia	Multi-affiliation	0	0	2	0	0	0	0	0	0	0	0	0	0	0	0	0	0	0	0	0	0	0	0	0	0	0	0	0	0	0	0	0	0	0
OTU_38505	Eukaryota	Alveolata	Dinophyta	Dinophyceae	Dinophyceae_X	Dinophyceae_XX	Pentapharsodinium	Pentapharsodinium_tyrrhenicum	0	0	0	0	0	0	0	0	0	0	0	0	0	0	0	0	0	0	0	0	0	0	0	2	0	0	0	0	0	0	0	0	0	0
OTU_38595	Eukaryota	Alveolata	Dinophyta	Dinophyceae	Suessiales	Suessiales_X	Woloszynskia	Woloszynskia_sp._strain1	0	0	0	1	0	0	0	0	0	0	0	0	0	0	0	0	0	0	0	0	0	0	0	0	0	0	0	0	0	0	0	0	0	0
OTU_38607	Eukaryota	Alveolata	Dinophyta	Dinophyceae	Suessiales	Suessiales_X	Woloszynskia	Woloszynskia_sp._strain1	0	0	0	0	0	0	0	0	0	0	0	0	0	0	0	0	0	0	0	0	1	0	0	0	0	0	0	0	0	0	0	0	0	0
OTU_38617	Eukaryota	Alveolata	Dinophyta	Dinophyceae	Suessiales	Suessiales_X	Woloszynskia	Woloszynskia_sp._strain1	0	0	0	0	0	2	0	0	0	0	0	0	0	0	0	0	0	0	0	0	0	0	0	0	0	0	0	0	0	0	0	0	0	0
OTU_38663	Eukaryota	Alveolata	Dinophyta	Dinophyceae	Suessiales	Suessiales_X	Woloszynskia	Woloszynskia_sp._strain1	1	0	0	0	0	0	0	0	0	0	0	0	0	0	0	0	0	0	0	0	0	0	0	0	0	0	0	0	0	0	1	0	0	0
OTU_38848	Eukaryota	Alveolata	Dinophyta	Dinophyceae	Suessiales	Suessiales_X	Woloszynskia	Woloszynskia_sp._strain1	0	1	0	0	0	0	0	0	0	0	0	0	0	0	0	0	0	1	0	0	0	0	0	0	0	0	0	0	0	0	0	0	0	0
OTU_38929	Eukaryota	Alveolata	Dinophyta	Dinophyceae	Suessiales	Suessiales_X	Woloszynskia	Woloszynskia_sp._strain1	0	0	0	0	0	0	0	0	0	0	0	2	0	0	0	0	0	0	0	0	0	0	0	0	0	0	0	0	0	0	0	0	0	0
OTU_39114	Eukaryota	Alveolata	Dinophyta	Dinophyceae	Suessiales	Suessiales_X	Woloszynskia	Woloszynskia_sp._strain1	1	0	0	0	0	0	0	0	0	0	0	0	0	0	0	0	0	0	0	0	0	0	0	0	0	0	0	0	0	0	0	0	0	0
OTU_39170	Eukaryota	Alveolata	Dinophyta	Dinophyceae	Suessiales	Suessiales_X	Woloszynskia	Woloszynskia_sp._strain1	0	0	0	0	0	0	0	0	0	0	0	0	1	0	0	0	0	0	0	0	0	0	0	0	0	0	0	0	0	0	0	1	0	0
OTU_39190	Eukaryota	Alveolata	Dinophyta	Dinophyceae	Suessiales	Suessiales_X	Woloszynskia	Woloszynskia_sp._strain1	0	0	0	0	0	0	1	0	0	0	0	0	0	0	0	0	0	0	0	0	0	0	0	0	0	0	0	0	0	0	0	1	0	0
OTU_39255	Eukaryota	Alveolata	Dinophyta	Dinophyceae	Suessiales	Suessiales_X	Woloszynskia	Woloszynskia_sp._strain1	0	0	0	0	0	0	0	0	0	0	0	0	0	0	0	0	1	0	1	0	0	0	0	0	0	0	0	0	0	0	0	0	0	0
OTU_39592	Eukaryota	Alveolata	Dinophyta	Dinophyceae	Suessiales	Suessiales_X	Woloszynskia	Woloszynskia_sp._strain1	0	0	0	0	0	0	0	0	0	0	0	0	0	0	0	0	0	0	0	0	0	0	0	0	2	0	0	0	0	0	0	0	0	0
OTU_39609	Eukaryota	Multi-affiliation	Multi-affiliation	Multi-affiliation	Multi-affiliation	Multi-affiliation	Multi-affiliation	Multi-affiliation	0	0	0	0	0	0	0	0	0	2	0	0	0	0	0	0	0	0	0	0	0	0	0	0	0	0	0	0	0	0	0	0	0	0
OTU_39660	Eukaryota	Alveolata	Dinophyta	Dinophyceae	Suessiales	Suessiales_X	Multi-affiliation	Multi-affiliation	0	0	0	0	0	0	0	0	0	0	0	0	0	0	0	0	0	0	0	0	0	1	0	0	0	0	0	0	0	0	0	0	0	0
OTU_39779	Eukaryota	Stramenopiles	Ochrophyta	Bacillariophyta	Bacillariophyta_X	Raphid-pennate	Gyrosigma	Multi-affiliation	0	0	0	0	0	0	0	0	0	0	0	0	0	0	0	0	0	0	0	0	0	0	0	0	0	2	0	0	0	0	0	0	0	0
OTU_39822	Eukaryota	Alveolata	Dinophyta	Syndiniales	Dino-Group-I	Dino-Group-I-Clade-1	Dino-Group-I-Clade-1_X	Multi-affiliation	0	0	0	0	0	0	0	0	0	0	0	0	0	0	0	0	0	0	0	0	0	0	0	0	0	0	0	0	3	0	0	0	0	0
OTU_39862	Eukaryota	Alveolata	Dinophyta	Dinophyceae	Suessiales	Suessiales_X	Woloszynskia	Woloszynskia_sp._strain1	0	0	0	0	0	0	0	0	0	0	0	0	0	0	0	0	0	0	0	0	0	0	0	0	0	1	0	0	0	0	1	0	0	0
OTU_40008	Eukaryota	Alveolata	Dinophyta	Dinophyceae	Multi-affiliation	Multi-affiliation	Multi-affiliation	Multi-affiliation	0	0	0	0	0	1	0	0	0	1	0	0	0	0	0	0	1	0	0	0	0	0	0	0	0	0	0	0	0	0	0	0	0	0
OTU_40064	Eukaryota	Alveolata	Dinophyta	Dinophyceae	Suessiales	Suessiales_X	Woloszynskia	Woloszynskia_sp._strain1	0	0	0	0	0	0	0	0	0	0	0	0	0	0	0	0	1	0	0	0	0	0	0	0	0	0	0	0	0	1	0	0	0	0
OTU_40070	Eukaryota	Alveolata	Dinophyta	Dinophyceae	Suessiales	Suessiales_X	Woloszynskia	Woloszynskia_sp._strain1	0	0	0	0	0	0	0	0	0	0	1	0	0	0	0	0	0	0	0	0	0	0	0	0	0	0	0	0	0	0	0	0	0	0
OTU_40074	Eukaryota	Alveolata	Dinophyta	Dinophyceae	Suessiales	Suessiales_X	Woloszynskia	Woloszynskia_sp._strain1	0	0	0	0	0	0	0	0	0	0	0	0	0	0	0	0	0	0	0	0	0	0	0	0	0	0	0	0	1	0	0	0	0	0
OTU_40156	Eukaryota	Multi-affiliation	Multi-affiliation	Multi-affiliation	Multi-affiliation	Multi-affiliation	Multi-affiliation	Multi-affiliation	0	0	0	0	0	0	0	0	0	0	0	0	0	0	0	0	0	0	0	0	0	0	0	0	0	0	0	0	0	0	1	0	0	0
OTU_40165	Eukaryota	Alveolata	Dinophyta	Dinophyceae	Suessiales	Suessiales_X	Suessiales_XX	Suessiales_XX_sp.	0	0	0	0	0	0	0	0	0	0	0	0	0	0	0	0	0	0	0	0	0	0	0	0	0	0	0	0	0	0	0	0	0	2
OTU_40194	Eukaryota	Alveolata	Dinophyta	Dinophyceae	Multi-affiliation	Multi-affiliation	Multi-affiliation	Multi-affiliation	0	0	0	0	0	0	0	0	0	0	0	0	0	0	0	0	0	0	0	1	1	0	0	0	0	0	0	0	0	0	0	0	0	0
OTU_40197	Eukaryota	Alveolata	Dinophyta	Dinophyceae	Suessiales	Suessiales_X	Symbiodinium	Multi-affiliation	0	0	0	0	0	0	0	1	0	0	0	0	0	0	0	0	0	0	0	0	0	0	0	0	0	0	0	0	0	0	0	0	0	0
OTU_40212	Eukaryota	Alveolata	Dinophyta	Dinophyceae	Suessiales	Suessiales_X	Symbiodinium	Symbiodinium_sp.	1	0	0	0	0	0	0	0	0	0	0	0	0	0	0	0	0	0	0	0	0	0	0	0	1	0	0	0	0	0	0	0	0	0
OTU_40718	Eukaryota	Alveolata	Dinophyta	Dinophyceae	Suessiales	Suessiales_X	Woloszynskia	Woloszynskia_sp._strain1	0	0	0	0	0	0	0	1	0	0	0	0	0	0	0	0	0	0	0	0	0	1	0	0	0	0	0	0	0	0	0	0	0	0
OTU_40762	Eukaryota	Alveolata	Dinophyta	Dinophyceae	Suessiales	Suessiales_X	Suessiales_XX	Suessiales_XX_sp.	0	0	0	0	0	0	1	0	0	0	0	0	0	0	0	0	0	0	0	0	0	0	0	0	0	0	0	0	1	0	0	0	0	0
OTU_40832	Eukaryota	Alveolata	Dinophyta	Dinophyceae	Suessiales	Suessiales_X	Woloszynskia	Woloszynskia_sp._strain1	1	0	0	0	0	0	0	0	0	0	0	0	0	0	0	0	0	0	0	0	0	1	0	0	0	0	0	0	0	0	0	0	0	0
OTU_40869	Eukaryota	Alveolata	Dinophyta	Dinophyceae	Dinophyceae_X	Dinophyceae_XX	Dinophyceae_XXX	Dinophyceae_XXX_sp.	0	0	0	0	0	0	0	0	0	0	0	0	0	0	0	0	0	0	0	0	0	0	0	0	0	0	0	0	0	0	3	0	0	0
OTU_40873	Eukaryota	Alveolata	Dinophyta	Dinophyceae	Suessiales	Suessiales_X	Woloszynskia	Woloszynskia_sp._strain1	0	0	0	0	0	0	0	0	0	1	0	0	0	0	0	0	0	0	0	0	0	0	0	0	0	0	0	0	0	1	0	0	0	0
OTU_40902	Eukaryota	Alveolata	Dinophyta	Dinophyceae	Dinophyceae_X	Dinophyceae_XX	Dinophyceae_XXX	Dinophyceae_XXX_sp.	0	0	0	1	0	0	0	0	0	0	0	0	0	0	0	0	0	0	0	0	0	0	0	0	0	0	0	0	0	1	0	0	0	0
OTU_40987	Eukaryota	Alveolata	Dinophyta	Dinophyceae	Suessiales	Suessiales_X	Woloszynskia	Woloszynskia_sp._strain1	0	0	0	0	0	0	0	0	0	0	0	0	0	0	0	0	0	0	0	1	0	0	0	0	0	0	0	0	0	1	0	0	0	0
OTU_41011	Eukaryota	Alveolata	Dinophyta	Dinophyceae	Suessiales	Suessiales_X	Woloszynskia	Woloszynskia_sp._strain1	0	1	0	0	0	1	0	0	0	0	0	0	0	0	0	0	0	0	0	0	0	0	0	0	0	1	0	0	0	0	0	0	0	0
OTU_41027	Eukaryota	Alveolata	Dinophyta	Dinophyceae	Suessiales	Suessiales_X	Woloszynskia	Woloszynskia_sp._strain1	0	0	0	0	0	0	0	0	0	0	0	0	0	0	0	0	0	0	0	0	0	0	0	0	0	0	0	0	0	2	0	0	0	0
OTU_41240	Eukaryota	Alveolata	Dinophyta	Dinophyceae	Suessiales	Suessiales_X	Woloszynskia	Woloszynskia_sp._strain1	0	0	0	0	0	0	0	0	0	0	0	0	0	0	0	0	0	0	0	0	0	0	0	0	0	0	1	0	0	0	0	0	0	0
OTU_41251	Eukaryota	Alveolata	Dinophyta	Dinophyceae	Dinophyceae_X	Dinophyceae_XX	Dinophyceae_XXX	Dinophyceae_XXX_sp.	0	0	0	0	0	0	0	0	0	0	0	0	0	0	0	0	0	0	0	0	0	0	0	0	0	0	0	0	0	2	0	0	0	0
OTU_41382	Eukaryota	Alveolata	Dinophyta	Dinophyceae	Dinophyceae_X	Dinophyceae_XX	Dinophyceae_XXX	Dinophyceae_XXX_sp.	0	0	0	0	0	0	0	0	0	0	0	0	0	0	0	0	0	0	0	0	0	0	0	0	0	0	0	0	0	1	0	0	0	0
OTU_41388	Eukaryota	Alveolata	Dinophyta	Dinophyceae	Dinophyceae_X	Dinophyceae_XX	Gymnodinium	Gymnodinium_dorsalisulcum	0	0	0	0	0	0	0	1	0	0	0	0	0	0	0	0	0	0	0	0	0	0	0	0	0	0	0	0	0	0	0	0	0	0
OTU_41496	Eukaryota	Alveolata	Dinophyta	Dinophyceae	Suessiales	Suessiales_X	Woloszynskia	Woloszynskia_sp._strain1	0	0	0	0	0	0	0	0	0	0	0	0	0	0	0	0	0	0	0	0	0	0	0	0	0	0	0	0	2	0	0	0	0	0
OTU_41595	Eukaryota	Alveolata	Dinophyta	Dinophyceae	Suessiales	Suessiales_X	Woloszynskia	Woloszynskia_sp._strain1	0	0	0	0	0	2	0	0	1	0	0	0	0	0	0	0	0	0	0	0	0	0	0	0	0	0	0	0	0	0	1	0	0	0
OTU_41688	Eukaryota	Multi-affiliation	Multi-affiliation	Multi-affiliation	Multi-affiliation	Multi-affiliation	Multi-affiliation	Multi-affiliation	0	0	0	0	0	0	2	0	0	0	0	0	0	0	0	0	0	0	0	0	0	0	0	0	0	0	0	0	0	0	0	0	0	0
OTU_41706	Eukaryota	Alveolata	Dinophyta	Dinophyceae	Suessiales	Suessiales_X	Woloszynskia	Woloszynskia_sp._strain1	0	0	0	0	0	0	0	0	0	0	0	0	1	0	0	0	0	0	0	0	0	0	0	0	0	0	0	0	0	0	0	0	0	0
OTU_41996	Eukaryota	Alveolata	Dinophyta	Syndiniales	Dino-Group-I	Dino-Group-I-Clade-1	Dino-Group-I-Clade-1_X	Multi-affiliation	0	0	0	0	0	0	0	0	0	0	0	0	0	0	0	0	0	0	1	0	0	0	0	0	0	0	1	0	0	0	0	0	0	0
OTU_42607	Eukaryota	Alveolata	Dinophyta	Syndiniales	Dino-Group-I	Dino-Group-I-Clade-1	Dino-Group-I-Clade-1_X	Multi-affiliation	0	0	0	0	0	0	0	0	0	1	0	0	0	0	0	0	0	0	0	0	0	0	0	0	0	0	0	0	0	0	0	0	0	0
OTU_42698	Eukaryota	Alveolata	Dinophyta	Syndiniales	Dino-Group-I	Dino-Group-I-Clade-1	Dino-Group-I-Clade-1_X	Multi-affiliation	0	0	0	0	0	0	0	0	0	1	0	0	0	0	0	0	0	0	0	0	0	0	0	0	0	0	0	0	0	0	0	0	0	0
OTU_43036	Eukaryota	Alveolata	Dinophyta	Syndiniales	Dino-Group-I	Dino-Group-I-Clade-1	Dino-Group-I-Clade-1_X	Multi-affiliation	0	0	0	0	0	0	0	0	0	0	0	0	0	0	0	0	0	0	0	0	0	0	0	0	0	0	0	0	1	0	0	0	0	0
OTU_43078	Eukaryota	Alveolata	Dinophyta	Syndiniales	Dino-Group-I	Dino-Group-I-Clade-1	Dino-Group-I-Clade-1_X	Multi-affiliation	0	0	0	0	0	0	0	0	0	0	0	0	0	0	0	0	0	0	0	0	0	0	0	0	0	2	0	0	0	0	0	0	0	0
OTU_43276	Eukaryota	Alveolata	Dinophyta	Syndiniales	Dino-Group-I	Dino-Group-I-Clade-1	Dino-Group-I-Clade-1_X	Multi-affiliation	0	0	0	0	0	0	0	0	0	0	0	0	0	0	0	0	0	0	1	0	0	0	0	0	0	0	0	0	0	0	0	0	0	0
OTU_44290	Eukaryota	Alveolata	Dinophyta	Dinophyceae	Suessiales	Suessiales_X	Woloszynskia	Woloszynskia_sp._strain1	0	2	0	0	0	0	0	0	0	0	0	0	0	0	0	0	0	0	0	0	0	0	0	0	0	0	0	0	0	0	0	0	0	0
OTU_44418	Eukaryota	Alveolata	Dinophyta	Dinophyceae	Dinophyceae_X	Dinophyceae_XX	Gymnodinium	Gymnodinium_dorsalisulcum	0	0	0	0	0	0	0	1	0	0	0	0	0	0	0	0	0	0	0	0	0	0	0	0	0	0	0	0	0	0	1	0	0	0
OTU_44543	Eukaryota	Alveolata	Dinophyta	Dinophyceae	Dinophyceae_X	Pfiesteriaceae	Multi-affiliation	Multi-affiliation	0	0	0	0	0	0	0	0	0	0	0	0	0	0	0	0	0	0	0	0	0	0	0	0	0	0	0	0	0	0	0	0	0	2
OTU_44798	Eukaryota	Alveolata	Dinophyta	Dinophyceae	Suessiales	Suessiales_X	Woloszynskia	Woloszynskia_sp._strain1	0	0	0	0	0	1	0	0	0	0	0	0	0	0	0	0	0	0	0	0	0	0	0	0	0	0	0	0	0	0	0	0	1	0
OTU_44846	Eukaryota	Multi-affiliation	Multi-affiliation	Multi-affiliation	Multi-affiliation	Multi-affiliation	Multi-affiliation	Multi-affiliation	0	0	0	0	0	0	0	0	0	0	0	0	0	0	0	0	0	0	0	0	0	0	0	0	0	0	0	0	2	0	0	0	0	0
OTU_44915	Eukaryota	Alveolata	Perkinsea	Perkinsida	Perkinsida_X	Perkinsida_XX	Perkinsus	Perkinsus_sp._strain1	0	0	0	0	0	0	0	0	0	0	0	0	0	0	0	0	0	0	0	0	0	0	1	0	0	0	0	0	0	0	0	0	0	0
OTU_44918	Eukaryota	Multi-affiliation	Multi-affiliation	Multi-affiliation	Multi-affiliation	Multi-affiliation	Multi-affiliation	Multi-affiliation	0	0	0	0	0	0	0	0	0	0	0	0	0	0	0	0	0	0	0	0	0	0	0	0	0	0	0	0	2	0	0	0	0	0
OTU_45282	Eukaryota	Alveolata	Dinophyta	Dinophyceae	Dinophyceae_X	Dinophyceae_XX	Multi-affiliation	Multi-affiliation	0	0	0	0	0	1	0	0	0	0	0	0	0	0	0	0	1	0	0	0	0	0	0	0	0	0	0	0	0	0	0	0	0	0
OTU_45633	Eukaryota	Alveolata	Dinophyta	Dinophyceae	Dinophyceae_X	Dinophyceae_XX	Multi-affiliation	Multi-affiliation	0	0	0	0	0	0	0	0	0	0	0	0	0	0	0	0	0	0	0	0	0	2	0	0	0	0	0	0	0	0	0	0	0	0
OTU_45649	Eukaryota	Alveolata	Dinophyta	Dinophyceae	Dinophyceae_X	Dinophyceae_XX	Multi-affiliation	Multi-affiliation	0	0	1	0	0	0	0	0	0	0	0	0	0	0	0	0	0	0	0	0	0	0	0	0	0	0	0	0	0	0	0	0	0	0
OTU_45735	Eukaryota	Alveolata	Dinophyta	Dinophyceae	Dinophyceae_X	Pfiesteriaceae	Multi-affiliation	Multi-affiliation	0	0	0	0	0	0	0	0	0	0	0	0	0	0	0	0	0	0	0	0	1	0	0	0	0	0	0	0	0	0	1	0	0	0
OTU_45922	Eukaryota	Alveolata	Dinophyta	Dinophyceae	Dinophyceae_X	Pfiesteriaceae	Multi-affiliation	Multi-affiliation	0	0	0	0	0	0	0	0	0	0	0	0	0	0	0	0	0	0	0	0	0	0	0	0	0	0	0	0	0	1	0	1	0	0
OTU_46304	Eukaryota	Alveolata	Dinophyta	Dinophyceae	Dinophyceae_X	Dinophyceae_XX	Multi-affiliation	Multi-affiliation	0	0	0	0	0	0	0	0	0	0	0	0	0	0	0	0	0	0	0	0	0	0	0	0	0	0	0	0	0	0	2	0	0	0
OTU_46565	Eukaryota	Alveolata	Dinophyta	Dinophyceae	Dinophyceae_X	Dinophyceae_XX	Multi-affiliation	Multi-affiliation	0	0	0	0	0	0	1	0	0	0	0	0	0	0	0	0	0	0	0	1	0	0	0	0	0	0	0	0	0	0	0	0	0	0
OTU_46649	Eukaryota	Alveolata	Dinophyta	Dinophyceae	Dinophyceae_X	Dinophyceae_XX	Multi-affiliation	Multi-affiliation	0	0	0	0	0	0	0	0	0	2	0	0	0	0	0	0	0	0	0	0	0	0	0	0	0	0	0	0	0	0	0	0	0	0
OTU_46650	Eukaryota	Alveolata	Dinophyta	Dinophyceae	Dinophyceae_X	Dinophyceae_XX	Multi-affiliation	Multi-affiliation	0	0	0	0	0	0	0	0	0	1	0	0	0	0	0	0	0	0	0	0	0	0	0	0	0	0	0	0	0	0	0	0	0	0
OTU_46652	Eukaryota	Alveolata	Dinophyta	Dinophyceae	Dinophyceae_X	Dinophyceae_XX	Multi-affiliation	Multi-affiliation	0	0	0	0	0	0	0	0	0	0	0	0	0	0	0	0	0	0	0	0	0	0	0	0	0	0	0	0	0	0	0	0	0	2
OTU_46709	Eukaryota	Alveolata	Dinophyta	Dinophyceae	Dinophyceae_X	Dinophyceae_XX	Multi-affiliation	Multi-affiliation	0	0	0	0	0	0	0	0	0	0	0	0	0	0	0	0	0	0	0	0	0	0	0	0	2	0	0	0	0	0	0	0	0	0
OTU_46760	Eukaryota	Alveolata	Dinophyta	Dinophyceae	Dinophyceae_X	Dinophyceae_XX	Multi-affiliation	Multi-affiliation	0	0	0	0	0	0	0	0	0	0	0	0	0	0	0	0	0	0	0	0	0	0	0	0	0	0	0	0	0	0	2	0	0	0
OTU_46766	Eukaryota	Alveolata	Dinophyta	Dinophyceae	Dinophyceae_X	Dinophyceae_XX	Multi-affiliation	Multi-affiliation	0	0	0	0	0	1	0	0	0	0	0	0	0	0	0	0	0	0	0	0	0	0	0	0	0	0	0	0	0	0	0	0	0	0
OTU_46842	Eukaryota	Alveolata	Dinophyta	Dinophyceae	Dinophyceae_X	Dinophyceae_XX	Multi-affiliation	Multi-affiliation	1	0	0	0	0	0	0	0	0	0	0	0	0	0	0	0	0	0	0	0	0	0	0	0	0	0	0	0	0	0	0	0	0	0
OTU_46843	Eukaryota	Alveolata	Dinophyta	Dinophyceae	Multi-affiliation	Multi-affiliation	Multi-affiliation	Multi-affiliation	1	0	0	0	0	0	0	0	0	0	0	0	0	0	0	0	0	0	0	0	0	0	0	1	0	0	0	0	0	0	0	0	0	0
OTU_47036	Eukaryota	Alveolata	Dinophyta	Dinophyceae	Dinophyceae_X	Dinophyceae_XX	Multi-affiliation	Multi-affiliation	0	0	0	0	0	0	0	0	0	0	0	0	0	0	0	0	0	0	0	0	0	0	1	0	0	0	0	0	0	0	0	0	0	0
OTU_47045	Eukaryota	Alveolata	Dinophyta	Dinophyceae	Dinophyceae_X	Dinophyceae_XX	Multi-affiliation	Multi-affiliation	0	0	0	0	0	0	0	0	0	0	0	0	0	0	0	0	0	0	0	0	0	0	2	0	0	0	0	0	0	0	0	0	0	0
OTU_47206	Eukaryota	Alveolata	Dinophyta	Dinophyceae	Dinophyceae_X	Dinophyceae_XX	Multi-affiliation	Multi-affiliation	0	0	0	0	0	0	0	0	0	0	0	0	0	0	0	0	0	0	0	0	0	0	0	0	0	1	0	0	0	0	0	0	0	0
OTU_47358	Eukaryota	Multi-affiliation	Multi-affiliation	Multi-affiliation	Multi-affiliation	Multi-affiliation	Multi-affiliation	Multi-affiliation	0	0	0	0	0	0	0	0	0	0	0	0	0	0	0	0	0	0	0	0	0	2	0	0	0	0	0	0	0	0	0	0	0	0
OTU_47728	Eukaryota	Multi-affiliation	Multi-affiliation	Multi-affiliation	Multi-affiliation	Multi-affiliation	Multi-affiliation	Multi-affiliation	0	0	0	0	0	0	0	0	0	0	0	0	0	0	0	0	0	0	0	0	0	0	0	0	0	0	0	0	0	1	0	0	0	0
OTU_47738	Eukaryota	Multi-affiliation	Multi-affiliation	Multi-affiliation	Multi-affiliation	Multi-affiliation	Multi-affiliation	Multi-affiliation	0	0	0	0	0	0	0	0	0	0	0	0	0	0	0	0	0	0	0	0	0	0	0	0	0	0	0	0	0	1	0	0	0	0
OTU_47761	Eukaryota	Multi-affiliation	Multi-affiliation	Multi-affiliation	Multi-affiliation	Multi-affiliation	Multi-affiliation	Multi-affiliation	0	0	0	0	0	0	0	0	1	0	0	0	0	0	0	0	0	0	0	0	0	0	0	0	0	0	0	0	0	0	0	0	0	1
OTU_47812	Eukaryota	Multi-affiliation	Multi-affiliation	Multi-affiliation	Multi-affiliation	Multi-affiliation	Multi-affiliation	Multi-affiliation	0	1	0	0	0	0	0	0	0	0	0	1	0	0	0	0	0	0	0	0	0	0	0	0	0	0	0	0	0	0	0	0	0	0
OTU_47838	Eukaryota	Alveolata	Dinophyta	Dinophyceae	Suessiales	Suessiales_X	Woloszynskia	Woloszynskia_sp.	0	2	0	0	0	0	0	0	0	0	0	0	0	0	0	0	0	0	0	0	0	0	0	0	0	0	0	0	0	0	0	0	0	0
OTU_48109	Eukaryota	Multi-affiliation	Multi-affiliation	Multi-affiliation	Multi-affiliation	Multi-affiliation	Multi-affiliation	Multi-affiliation	0	0	0	0	0	0	0	0	0	0	0	0	0	0	0	0	0	0	0	0	0	0	0	0	0	0	0	0	0	0	0	0	0	1
OTU_48183	Eukaryota	Alveolata	Dinophyta	Dinophyceae	Suessiales	Suessiales_X	Woloszynskia	Woloszynskia_sp.	0	0	0	0	0	0	0	0	0	0	0	0	0	0	0	0	0	0	0	0	0	0	0	0	0	0	0	0	0	2	0	0	0	0
OTU_48215	Eukaryota	Multi-affiliation	Multi-affiliation	Multi-affiliation	Multi-affiliation	Multi-affiliation	Multi-affiliation	Multi-affiliation	0	0	0	0	0	0	0	0	0	0	0	0	1	0	0	0	0	0	0	0	0	0	0	0	0	0	0	0	1	0	0	0	0	0
OTU_48503	Eukaryota	Multi-affiliation	Multi-affiliation	Multi-affiliation	Multi-affiliation	Multi-affiliation	Multi-affiliation	Multi-affiliation	0	0	0	0	0	0	0	0	0	0	0	0	0	0	0	0	0	0	0	0	1	0	0	0	0	0	0	0	1	0	0	0	0	0
OTU_48648	Eukaryota	Multi-affiliation	Multi-affiliation	Multi-affiliation	Multi-affiliation	Multi-affiliation	Multi-affiliation	Multi-affiliation	0	0	0	0	0	0	0	0	0	0	0	0	0	2	0	0	0	0	0	0	0	0	0	0	0	0	0	0	0	0	0	0	0	0
OTU_49049	Eukaryota	Alveolata	Dinophyta	Dinophyceae	Suessiales	Suessiales_X	Woloszynskia	Woloszynskia_sp.	0	0	0	0	0	0	0	0	0	0	0	0	0	0	0	0	0	0	0	0	0	0	0	0	0	0	0	0	0	0	0	0	0	1
OTU_49175	Eukaryota	Alveolata	Dinophyta	Dinophyceae	Suessiales	Suessiales_X	Woloszynskia	Woloszynskia_cincta	0	0	0	0	0	0	0	0	0	0	0	0	0	0	0	0	0	0	0	0	0	0	0	0	0	0	0	0	0	0	0	2	0	0
OTU_49217	Eukaryota	Multi-affiliation	Multi-affiliation	Multi-affiliation	Multi-affiliation	Multi-affiliation	Multi-affiliation	Multi-affiliation	0	0	0	0	0	0	0	0	0	0	0	0	0	0	0	0	0	0	0	0	0	0	0	0	0	0	0	0	0	1	0	0	0	0
OTU_49346	Eukaryota	Multi-affiliation	Multi-affiliation	Multi-affiliation	Multi-affiliation	Multi-affiliation	Multi-affiliation	Multi-affiliation	0	0	0	0	0	0	0	0	0	0	0	0	0	0	0	0	0	0	0	0	0	0	0	0	0	0	0	0	0	2	0	0	0	0
OTU_49457	Eukaryota	Multi-affiliation	Multi-affiliation	Multi-affiliation	Multi-affiliation	Multi-affiliation	Multi-affiliation	Multi-affiliation	0	0	0	0	0	0	0	0	0	0	0	0	0	0	0	0	0	0	0	0	0	0	0	0	0	0	0	0	0	0	0	0	1	0
OTU_49668	Eukaryota	Multi-affiliation	Multi-affiliation	Multi-affiliation	Multi-affiliation	Multi-affiliation	Multi-affiliation	Multi-affiliation	0	0	0	0	0	0	0	0	1	0	0	0	0	0	0	0	0	0	0	0	0	0	0	0	0	0	0	0	0	1	0	0	0	0
OTU_49828	Eukaryota	Multi-affiliation	Multi-affiliation	Multi-affiliation	Multi-affiliation	Multi-affiliation	Multi-affiliation	Multi-affiliation	0	0	0	0	0	0	0	0	0	0	0	0	0	0	0	0	0	0	0	0	0	0	0	0	0	0	0	0	2	0	0	0	0	0
OTU_49997	Eukaryota	Multi-affiliation	Multi-affiliation	Multi-affiliation	Multi-affiliation	Multi-affiliation	Multi-affiliation	Multi-affiliation	0	0	0	0	0	0	0	0	0	0	0	1	0	0	0	0	0	0	0	0	0	0	0	0	0	0	0	0	0	1	0	0	0	0
OTU_50053	Eukaryota	Alveolata	Dinophyta	Dinophyceae	Dinophyceae_X	Dinophyceae_XX	Dinophyceae_XXX	Dinophyceae_XXX_sp.	0	0	0	0	2	0	0	0	0	0	0	0	0	0	0	0	0	0	0	0	0	0	0	0	0	0	0	0	0	0	0	0	0	0
OTU_50412	Eukaryota	Alveolata	Dinophyta	Dinophyceae	Suessiales	Suessiales_X	Woloszynskia	Woloszynskia_sp._strain1	0	1	0	0	0	0	0	0	0	1	0	0	0	0	0	0	1	0	0	0	0	0	0	0	0	0	0	0	0	0	0	0	0	1
OTU_50605	Eukaryota	Alveolata	Dinophyta	Dinophyceae	Suessiales	Suessiales_X	Woloszynskia	Woloszynskia_sp._strain1	3	0	0	0	0	0	0	0	0	0	0	0	0	0	0	0	0	0	0	0	0	0	0	0	0	0	0	0	0	0	1	0	0	0
OTU_50628	Eukaryota	Alveolata	Dinophyta	Dinophyceae	Suessiales	Suessiales_X	Woloszynskia	Woloszynskia_sp._strain1	0	0	0	0	0	0	0	0	0	0	0	0	0	0	0	0	0	0	0	0	0	0	0	0	1	1	0	0	0	0	0	0	0	0
OTU_50964	Eukaryota	Alveolata	Dinophyta	Dinophyceae	Dinophyceae_X	Dinophyceae_XX	Dinophyceae_XXX	Dinophyceae_XXX_sp.	0	0	0	0	0	0	0	1	0	0	0	0	0	0	0	0	0	0	0	0	0	0	0	0	0	0	0	0	0	1	0	0	0	0
OTU_51018	Eukaryota	Alveolata	Dinophyta	Dinophyceae	Dinophyceae_X	Dinophyceae_XX	Dinophyceae_XXX	Dinophyceae_XXX_sp.	0	0	0	0	0	0	0	0	0	0	0	0	0	0	0	0	0	0	0	0	1	0	0	0	0	0	0	0	0	0	1	0	0	0
OTU_51391	Eukaryota	Alveolata	Dinophyta	Dinophyceae	Dinophyceae_X	Dinophyceae_XX	Dinophyceae_XXX	Dinophyceae_XXX_sp.	0	1	0	0	0	0	0	0	0	0	0	0	0	0	0	0	0	0	0	0	0	0	0	0	0	0	0	0	0	0	0	0	0	0
OTU_51777	Eukaryota	Alveolata	Dinophyta	Dinophyceae	Dinophyceae_X	Dinophyceae_XX	Pentapharsodinium	Pentapharsodinium_tyrrhenicum	0	0	0	0	0	0	0	0	0	0	0	0	0	0	2	0	0	0	0	0	0	0	0	0	0	0	0	0	0	0	0	0	0	0
OTU_51885	Eukaryota	Alveolata	Dinophyta	Dinophyceae	Dinophyceae_X	Dinophyceae_XX	Multi-affiliation	Multi-affiliation	0	0	0	0	0	1	0	0	0	0	0	0	0	0	1	0	0	0	0	0	0	0	0	0	0	0	0	0	0	0	0	0	0	0
OTU_51979	Eukaryota	Alveolata	Dinophyta	Dinophyceae	Dinophyceae_X	Dinophyceae_XX	Multi-affiliation	Multi-affiliation	0	0	0	0	0	0	0	0	0	0	0	0	0	0	0	0	0	0	0	0	0	0	0	0	0	0	0	0	0	2	0	0	0	0
OTU_52305	Eukaryota	Alveolata	Dinophyta	Dinophyceae	Dinophyceae_X	Dinophyceae_XX	Multi-affiliation	Multi-affiliation	2	0	0	0	0	0	0	0	0	0	0	0	0	0	0	0	0	0	0	0	0	0	0	0	0	0	0	0	0	0	0	0	0	0
OTU_52349	Eukaryota	Alveolata	Dinophyta	Dinophyceae	Dinophyceae_X	Dinophyceae_XX	Gymnodinium	Gymnodinium_dorsalisulcum	0	0	0	0	0	0	0	0	0	0	0	0	0	0	0	0	0	0	0	0	0	0	0	0	0	0	0	0	0	0	0	2	0	0
OTU_52381	Eukaryota	Alveolata	Dinophyta	Dinophyceae	Suessiales	Suessiales_X	Suessiales_XX	Suessiales_XX_sp.	0	0	0	0	0	0	0	0	0	0	0	0	0	0	0	0	0	0	0	0	0	0	0	0	0	0	0	0	2	0	1	0	0	0
OTU_52404	Eukaryota	Alveolata	Dinophyta	Dinophyceae	Dinophyceae_X	Dinophyceae_XX	Gymnodinium	Gymnodinium_dorsalisulcum	0	0	0	0	0	0	0	0	0	0	0	0	0	0	0	0	0	0	0	0	0	0	0	0	0	0	0	0	0	2	0	0	0	0
OTU_52412	Eukaryota	Alveolata	Dinophyta	Dinophyceae	Dinophyceae_X	Dinophyceae_XX	Gymnodinium	Gymnodinium_dorsalisulcum	0	0	0	0	0	0	0	0	0	0	0	0	0	0	0	0	0	0	0	0	0	0	0	0	0	0	0	0	0	1	0	0	1	0
OTU_52429	Eukaryota	Alveolata	Dinophyta	Dinophyceae	Dinophyceae_X	Dinophyceae_XX	Gymnodinium	Gymnodinium_dorsalisulcum	0	0	0	0	0	0	0	0	0	0	0	0	0	0	0	0	0	0	0	0	0	2	0	0	0	0	0	0	0	0	0	0	0	0
OTU_52435	Eukaryota	Alveolata	Dinophyta	Dinophyceae	Dinophyceae_X	Dinophyceae_XX	Gymnodinium	Gymnodinium_dorsalisulcum	0	0	0	0	0	0	0	0	0	0	0	0	0	0	0	0	0	0	0	0	0	0	0	0	0	0	0	0	1	0	0	0	0	0
OTU_52442	Eukaryota	Alveolata	Dinophyta	Dinophyceae	Dinophyceae_X	Dinophyceae_XX	Gymnodinium	Gymnodinium_dorsalisulcum	0	1	0	0	0	0	0	0	0	0	0	0	0	0	0	0	0	0	0	0	0	0	0	0	0	0	0	0	1	0	0	0	0	0
OTU_52463	Eukaryota	Alveolata	Dinophyta	Dinophyceae	Dinophyceae_X	Dinophyceae_XX	Gymnodinium	Gymnodinium_dorsalisulcum	0	0	0	0	0	0	0	0	0	0	0	0	0	0	0	0	0	0	0	0	0	1	0	0	0	0	0	0	1	0	0	1	0	0
OTU_52550	Eukaryota	Alveolata	Dinophyta	Dinophyceae	Dinophyceae_X	Dinophyceae_XX	Gymnodinium	Gymnodinium_dorsalisulcum	0	0	0	0	0	0	0	1	0	0	0	0	0	0	0	0	0	0	0	0	0	0	0	0	0	0	0	0	0	0	0	0	0	0
OTU_52705	Eukaryota	Alveolata	Dinophyta	Dinophyceae	Dinophyceae_X	Dinophyceae_XX	Gymnodinium	Gymnodinium_dorsalisulcum	0	0	0	0	0	0	0	0	0	0	0	0	0	0	0	0	0	0	0	0	0	0	0	0	0	0	0	0	0	0	0	1	0	0
OTU_52710	Eukaryota	Alveolata	Dinophyta	Dinophyceae	Dinophyceae_X	Dinophyceae_XX	Gymnodinium	Gymnodinium_dorsalisulcum	0	1	0	1	0	0	0	0	0	0	0	0	0	0	0	0	0	0	0	0	0	0	0	0	0	0	0	0	0	0	0	0	0	0
OTU_53044	Eukaryota	Alveolata	Dinophyta	Dinophyceae	Dinophyceae_X	Dinophyceae_XX	Gymnodinium	Gymnodinium_dorsalisulcum	0	0	0	0	0	0	0	0	0	0	0	0	0	0	0	0	0	0	0	0	0	0	0	0	0	0	0	1	0	0	0	0	0	0
OTU_53063	Eukaryota	Alveolata	Dinophyta	Dinophyceae	Dinophyceae_X	Dinophyceae_XX	Gymnodinium	Gymnodinium_dorsalisulcum	0	0	0	0	0	0	0	0	0	0	0	1	0	0	0	0	0	0	0	0	0	0	0	0	0	0	0	0	0	0	0	0	0	0
OTU_53088	Eukaryota	Alveolata	Dinophyta	Dinophyceae	Dinophyceae_X	Dinophyceae_XX	Gymnodinium	Gymnodinium_dorsalisulcum	0	1	0	0	0	0	0	0	0	0	0	0	0	0	0	0	0	0	0	0	0	0	0	0	0	0	0	0	0	1	0	0	0	0
OTU_53452	Eukaryota	Alveolata	Dinophyta	Dinophyceae	Suessiales	Suessiales_X	Woloszynskia	Woloszynskia_sp._strain1	0	0	0	0	0	0	0	0	0	1	0	0	0	0	0	0	0	0	0	0	0	0	0	0	2	0	0	0	0	0	0	0	0	0
OTU_53509	Eukaryota	Alveolata	Dinophyta	Dinophyceae	Suessiales	Suessiales_X	Suessiales_XX	Suessiales_XX_sp.	0	0	0	0	0	0	0	0	0	0	0	0	2	0	0	0	0	0	0	0	0	0	0	0	0	0	0	0	0	0	0	0	0	0
OTU_53524	Eukaryota	Alveolata	Dinophyta	Dinophyceae	Suessiales	Suessiales_X	Woloszynskia	Woloszynskia_sp._strain1	0	0	0	0	0	0	0	0	0	0	0	0	0	0	0	0	0	0	0	0	0	1	0	0	0	0	0	0	0	1	0	0	0	0
OTU_53528	Eukaryota	Alveolata	Dinophyta	Dinophyceae	Suessiales	Suessiales_X	Woloszynskia	Woloszynskia_sp._strain1	0	0	0	0	0	0	0	0	0	0	0	1	0	0	0	0	0	0	0	0	0	0	0	0	1	0	0	0	0	0	0	0	0	0
OTU_53628	Eukaryota	Alveolata	Dinophyta	Dinophyceae	Suessiales	Suessiales_X	Woloszynskia	Woloszynskia_sp._strain1	1	0	0	0	0	1	0	0	0	0	0	0	0	0	0	0	0	0	0	0	0	0	0	0	0	0	0	0	0	0	0	0	0	0
OTU_53671	Eukaryota	Alveolata	Dinophyta	Dinophyceae	Multi-affiliation	Multi-affiliation	Multi-affiliation	Multi-affiliation	0	1	0	0	0	0	0	0	0	0	0	0	0	0	0	0	0	0	0	0	0	1	0	0	0	0	1	0	0	0	0	0	0	0
OTU_53714	Eukaryota	Alveolata	Dinophyta	Dinophyceae	Suessiales	Suessiales_X	Woloszynskia	Woloszynskia_sp._strain1	0	0	0	0	0	0	0	0	0	0	0	0	0	0	0	0	1	0	0	0	0	0	0	0	0	0	0	0	0	0	0	0	0	0
OTU_53727	Eukaryota	Alveolata	Dinophyta	Dinophyceae	Suessiales	Suessiales_X	Woloszynskia	Woloszynskia_sp._strain1	0	0	1	0	0	0	0	0	0	0	0	0	0	0	0	0	0	0	0	0	0	0	0	0	0	0	1	0	0	0	0	0	0	0
OTU_53766	Eukaryota	Alveolata	Dinophyta	Dinophyceae	Suessiales	Suessiales_X	Woloszynskia	Woloszynskia_sp._strain1	0	0	0	0	0	1	0	0	0	1	0	0	0	0	0	0	0	0	0	0	0	0	0	0	0	0	0	0	0	0	0	0	0	0
OTU_53871	Eukaryota	Alveolata	Dinophyta	Dinophyceae	Suessiales	Suessiales_X	Woloszynskia	Woloszynskia_sp._strain1	0	0	0	0	0	0	0	0	0	0	0	0	0	0	0	0	0	0	0	0	0	0	0	0	0	1	0	0	0	0	0	0	0	0
OTU_53893	Eukaryota	Alveolata	Dinophyta	Dinophyceae	Suessiales	Suessiales_X	Woloszynskia	Woloszynskia_sp._strain1	0	0	0	0	0	1	0	0	0	0	0	0	0	0	0	0	0	0	0	0	0	0	0	0	0	0	0	0	0	0	0	0	0	0
OTU_53897	Eukaryota	Alveolata	Dinophyta	Dinophyceae	Suessiales	Suessiales_X	Woloszynskia	Woloszynskia_sp._strain1	0	0	0	0	0	1	0	0	0	1	0	0	0	0	0	0	0	0	0	0	0	0	0	0	0	0	0	0	0	0	0	0	0	0
OTU_53915	Eukaryota	Alveolata	Dinophyta	Dinophyceae	Suessiales	Suessiales_X	Woloszynskia	Woloszynskia_sp._strain1	0	0	0	0	0	0	0	0	0	0	0	0	0	0	0	0	0	0	0	0	0	0	0	0	0	0	0	0	0	0	1	0	0	1
OTU_53946	Eukaryota	Alveolata	Dinophyta	Dinophyceae	Suessiales	Suessiales_X	Woloszynskia	Woloszynskia_sp._strain1	0	0	0	0	0	1	0	0	0	0	0	0	0	0	0	0	0	0	0	0	0	0	0	0	0	0	0	0	0	0	1	0	0	0
OTU_53950	Eukaryota	Alveolata	Dinophyta	Dinophyceae	Suessiales	Suessiales_X	Woloszynskia	Woloszynskia_sp._strain1	0	0	0	0	0	0	0	0	0	0	0	0	0	0	0	0	1	0	0	0	0	0	0	0	0	1	0	0	0	0	0	0	0	0
OTU_54014	Eukaryota	Alveolata	Dinophyta	Dinophyceae	Suessiales	Suessiales_X	Woloszynskia	Woloszynskia_sp._strain1	0	0	0	0	0	0	0	0	1	0	0	0	0	0	0	0	0	0	0	0	0	0	0	0	0	0	0	0	0	1	0	0	0	0
OTU_54134	Eukaryota	Alveolata	Dinophyta	Dinophyceae	Suessiales	Suessiales_X	Woloszynskia	Woloszynskia_sp._strain1	0	0	0	0	0	0	0	0	1	0	0	0	0	0	0	0	0	0	0	0	1	0	0	0	0	0	0	0	0	0	0	0	0	0
OTU_54165	Eukaryota	Alveolata	Dinophyta	Dinophyceae	Suessiales	Suessiales_X	Woloszynskia	Woloszynskia_sp._strain1	0	0	0	0	0	0	0	0	0	0	0	0	0	0	0	0	0	0	0	0	0	0	0	0	0	1	0	0	0	0	0	0	0	0
OTU_54256	Eukaryota	Alveolata	Dinophyta	Dinophyceae	Suessiales	Suessiales_X	Woloszynskia	Woloszynskia_sp._strain1	0	0	0	0	0	0	0	0	0	0	0	0	0	0	0	0	0	0	0	0	0	0	0	0	0	0	1	0	0	0	0	0	0	0
OTU_54266	Eukaryota	Alveolata	Dinophyta	Dinophyceae	Suessiales	Suessiales_X	Woloszynskia	Woloszynskia_sp._strain1	0	0	0	1	0	0	0	0	0	0	0	1	0	0	0	0	0	0	0	0	0	0	0	0	0	0	0	0	0	0	0	0	0	0
OTU_54305	Eukaryota	Alveolata	Dinophyta	Dinophyceae	Suessiales	Suessiales_X	Woloszynskia	Woloszynskia_sp._strain1	0	0	0	0	0	1	0	0	0	0	0	0	0	0	0	0	0	0	0	0	1	0	0	0	0	0	0	0	0	0	0	0	0	0
OTU_54331	Eukaryota	Alveolata	Dinophyta	Dinophyceae	Suessiales	Suessiales_X	Woloszynskia	Woloszynskia_sp._strain1	0	0	0	0	0	0	0	0	0	0	0	0	0	0	0	0	0	0	0	0	0	0	0	0	0	0	0	1	0	0	0	0	0	0
OTU_54350	Eukaryota	Alveolata	Dinophyta	Dinophyceae	Suessiales	Suessiales_X	Woloszynskia	Woloszynskia_sp._strain1	0	0	0	0	0	0	0	0	0	0	0	0	0	0	0	0	2	1	0	0	0	1	0	0	0	0	0	0	0	0	0	0	1	0
OTU_54367	Eukaryota	Alveolata	Dinophyta	Dinophyceae	Suessiales	Suessiales_X	Woloszynskia	Woloszynskia_sp._strain1	0	0	0	0	0	0	0	0	0	0	0	0	0	0	0	0	0	0	0	0	0	0	0	0	0	0	0	0	0	0	2	0	0	0
OTU_54396	Eukaryota	Alveolata	Dinophyta	Dinophyceae	Suessiales	Suessiales_X	Woloszynskia	Woloszynskia_sp._strain1	0	1	0	1	0	0	0	0	0	0	0	0	0	0	0	0	0	0	0	0	0	0	0	0	0	0	0	0	0	0	0	0	0	0
OTU_54423	Eukaryota	Alveolata	Dinophyta	Dinophyceae	Suessiales	Suessiales_X	Woloszynskia	Woloszynskia_sp._strain1	0	0	0	0	0	0	0	0	0	0	0	0	0	0	0	0	0	0	0	0	0	0	0	0	0	1	0	0	1	0	0	0	0	0
OTU_54473	Eukaryota	Alveolata	Dinophyta	Dinophyceae	Suessiales	Suessiales_X	Woloszynskia	Woloszynskia_sp._strain1	0	0	0	0	0	0	0	1	0	0	0	0	0	0	0	0	0	0	0	0	0	0	0	0	0	0	1	0	0	0	0	0	0	0
OTU_54483	Eukaryota	Alveolata	Dinophyta	Dinophyceae	Suessiales	Suessiales_X	Woloszynskia	Woloszynskia_sp._strain1	0	0	0	0	0	1	0	0	0	0	0	0	0	0	0	0	0	0	0	0	0	0	0	0	0	0	0	0	0	0	0	0	0	0
OTU_54544	Eukaryota	Alveolata	Dinophyta	Dinophyceae	Suessiales	Suessiales_X	Woloszynskia	Woloszynskia_sp._strain1	0	0	0	0	0	0	0	0	0	0	0	0	0	0	0	0	0	0	0	0	0	0	0	0	0	0	0	0	2	0	0	0	0	0
OTU_54585	Eukaryota	Alveolata	Dinophyta	Dinophyceae	Multi-affiliation	Multi-affiliation	Multi-affiliation	Multi-affiliation	0	0	0	0	0	0	0	0	0	0	0	0	0	0	0	0	0	0	0	0	0	1	0	0	1	0	0	0	0	1	0	0	0	0
OTU_54702	Eukaryota	Alveolata	Dinophyta	Dinophyceae	Suessiales	Suessiales_X	Woloszynskia	Woloszynskia_sp._strain1	0	0	0	0	0	0	0	0	0	0	0	0	0	0	0	0	0	0	0	0	0	0	0	0	0	0	1	0	0	0	0	0	0	0
OTU_54763	Eukaryota	Alveolata	Dinophyta	Dinophyceae	Suessiales	Suessiales_X	Woloszynskia	Woloszynskia_sp._strain1	0	0	0	0	0	0	0	0	0	0	0	0	0	0	0	0	0	0	0	1	0	0	0	0	0	0	0	0	0	0	1	0	0	0
OTU_54914	Eukaryota	Alveolata	Dinophyta	Dinophyceae	Suessiales	Suessiales_X	Woloszynskia	Woloszynskia_sp._strain1	0	0	0	0	0	0	0	0	0	0	0	0	0	0	0	0	0	0	0	1	0	0	0	0	0	0	0	0	0	0	0	0	0	0
OTU_54945	Eukaryota	Alveolata	Dinophyta	Dinophyceae	Suessiales	Suessiales_X	Woloszynskia	Woloszynskia_sp._strain1	0	0	0	0	0	1	0	0	0	0	0	1	0	0	0	0	0	0	0	0	0	0	0	0	0	0	0	0	0	0	0	0	0	0
OTU_55030	Eukaryota	Alveolata	Dinophyta	Dinophyceae	Suessiales	Suessiales_X	Woloszynskia	Woloszynskia_sp._strain1	2	0	0	0	0	0	0	0	0	0	0	0	0	0	0	0	0	0	0	0	0	0	0	0	0	0	0	0	0	0	0	0	0	0
OTU_55084	Eukaryota	Alveolata	Dinophyta	Dinophyceae	Suessiales	Suessiales_X	Woloszynskia	Woloszynskia_sp._strain1	0	0	0	0	0	0	0	0	0	0	0	0	0	0	0	0	0	0	0	0	1	0	0	0	0	0	1	0	0	0	0	0	0	0
OTU_55096	Eukaryota	Alveolata	Dinophyta	Dinophyceae	Suessiales	Suessiales_X	Woloszynskia	Woloszynskia_sp._strain1	1	0	0	0	0	0	0	0	0	1	0	0	0	0	0	0	0	0	0	0	0	0	0	0	0	0	0	0	0	2	0	0	0	0
OTU_55103	Eukaryota	Alveolata	Dinophyta	Dinophyceae	Suessiales	Suessiales_X	Woloszynskia	Woloszynskia_sp._strain1	0	0	0	0	0	1	0	0	0	0	0	0	0	0	0	0	0	0	0	0	0	0	0	0	0	0	0	0	0	0	0	0	0	0
OTU_55200	Eukaryota	Alveolata	Dinophyta	Dinophyceae	Multi-affiliation	Multi-affiliation	Multi-affiliation	Multi-affiliation	0	0	0	0	0	0	0	0	0	0	0	0	0	0	0	0	0	0	0	0	0	1	0	0	0	0	0	0	0	0	0	0	0	0
OTU_55204	Eukaryota	Alveolata	Dinophyta	Dinophyceae	Multi-affiliation	Multi-affiliation	Multi-affiliation	Multi-affiliation	0	0	0	0	0	0	0	0	0	0	0	0	0	0	0	0	2	0	0	0	0	0	0	0	0	0	0	0	0	0	0	0	0	0
OTU_55205	Eukaryota	Alveolata	Dinophyta	Dinophyceae	Dinophyceae_X	Dinophyceae_XX	Dinophyceae_XXX	Dinophyceae_XXX_sp.	0	0	0	0	0	1	0	0	0	0	0	0	0	0	0	0	0	0	0	0	0	0	0	0	0	0	0	0	0	0	0	0	0	0
OTU_55241	Eukaryota	Alveolata	Dinophyta	Dinophyceae	Multi-affiliation	Multi-affiliation	Multi-affiliation	Multi-affiliation	0	0	0	0	0	1	0	1	0	0	0	0	0	0	0	0	0	0	0	0	0	0	0	0	0	0	0	0	0	0	0	0	0	0
OTU_55267	Eukaryota	Alveolata	Dinophyta	Dinophyceae	Multi-affiliation	Multi-affiliation	Multi-affiliation	Multi-affiliation	0	0	0	0	0	0	0	0	0	0	0	0	0	0	0	0	0	0	0	0	0	1	0	0	0	0	0	0	0	1	0	0	0	0
OTU_55342	Eukaryota	Alveolata	Dinophyta	Dinophyceae	Suessiales	Suessiales_X	Multi-affiliation	Multi-affiliation	0	0	0	0	0	0	0	0	0	0	0	0	0	0	0	0	0	0	0	0	0	0	0	0	2	0	0	0	0	0	0	0	0	0
OTU_55486	Eukaryota	Alveolata	Dinophyta	Dinophyceae	Suessiales	Suessiales_X	Woloszynskia	Woloszynskia_sp._strain1	0	0	0	0	0	1	0	0	1	0	0	0	1	1	0	0	1	0	0	0	0	0	0	0	1	0	0	0	1	0	0	0	0	0
OTU_55515	Eukaryota	Alveolata	Dinophyta	Dinophyceae	Suessiales	Suessiales_X	Multi-affiliation	Multi-affiliation	0	0	0	0	0	0	0	0	0	2	0	0	0	0	0	0	0	0	0	0	0	0	0	0	0	0	0	0	0	0	0	0	0	0
OTU_55569	Eukaryota	Alveolata	Dinophyta	Dinophyceae	Suessiales	Suessiales_X	Woloszynskia	Woloszynskia_sp._strain1	0	0	0	0	0	0	0	0	0	0	0	0	0	0	0	0	0	0	0	0	1	0	0	0	0	0	0	0	0	0	0	0	0	0
OTU_55607	Eukaryota	Alveolata	Dinophyta	Dinophyceae	Suessiales	Suessiales_X	Woloszynskia	Woloszynskia_sp._strain1	0	0	0	0	0	0	0	1	0	0	0	0	0	0	0	0	0	0	0	0	0	0	0	0	0	0	0	0	0	1	0	0	0	0
OTU_55659	Eukaryota	Alveolata	Dinophyta	Dinophyceae	Suessiales	Suessiales_X	Woloszynskia	Woloszynskia_sp._strain1	1	0	0	0	0	0	0	0	0	0	0	0	0	0	0	0	0	0	0	0	0	0	0	0	1	0	0	0	0	0	0	0	0	0
OTU_55708	Eukaryota	Alveolata	Dinophyta	Dinophyceae	Suessiales	Suessiales_X	Woloszynskia	Woloszynskia_sp._strain1	0	0	0	0	0	0	0	0	0	0	0	0	1	0	0	0	0	0	0	0	0	0	0	0	0	0	0	0	0	0	0	0	0	0
OTU_55719	Eukaryota	Alveolata	Dinophyta	Dinophyceae	Suessiales	Suessiales_X	Woloszynskia	Woloszynskia_sp._strain1	0	0	0	0	0	0	0	1	0	0	0	0	0	0	0	0	0	0	0	0	0	0	0	0	0	0	0	0	0	0	0	0	0	0
OTU_55782	Eukaryota	Alveolata	Dinophyta	Dinophyceae	Multi-affiliation	Multi-affiliation	Multi-affiliation	Multi-affiliation	0	0	0	0	0	0	0	0	0	0	0	0	1	0	0	0	0	0	0	0	0	0	0	0	0	1	0	0	0	0	0	0	0	0
OTU_55829	Eukaryota	Alveolata	Dinophyta	Dinophyceae	Suessiales	Suessiales_X	Woloszynskia	Woloszynskia_sp._strain1	0	0	0	0	0	0	0	1	0	0	0	0	0	0	0	0	0	0	0	0	0	0	0	0	0	0	1	0	0	0	0	0	0	0
OTU_55843	Eukaryota	Alveolata	Dinophyta	Dinophyceae	Suessiales	Suessiales_X	Woloszynskia	Woloszynskia_sp._strain1	0	0	0	0	0	0	0	1	0	0	0	0	0	0	0	0	0	0	0	0	0	0	0	0	0	0	0	0	0	0	0	0	0	0
OTU_55934	Eukaryota	Alveolata	Dinophyta	Dinophyceae	Suessiales	Suessiales_X	Woloszynskia	Woloszynskia_sp._strain1	0	0	0	0	0	1	0	0	0	0	0	0	0	0	0	0	0	0	0	0	0	0	0	0	0	0	1	0	0	0	0	0	0	0
OTU_55983	Eukaryota	Alveolata	Dinophyta	Dinophyceae	Suessiales	Suessiales_X	Woloszynskia	Woloszynskia_sp._strain1	0	0	0	0	0	0	0	1	0	0	0	0	0	0	0	0	0	0	0	0	0	0	0	0	1	0	0	0	0	0	0	0	0	0
OTU_55999	Eukaryota	Alveolata	Dinophyta	Dinophyceae	Suessiales	Suessiales_X	Woloszynskia	Woloszynskia_sp._strain1	0	0	0	0	0	0	0	0	0	0	0	0	0	0	0	0	2	0	0	0	0	0	0	0	0	0	0	0	0	0	0	0	0	0
OTU_56068	Eukaryota	Alveolata	Dinophyta	Dinophyceae	Suessiales	Suessiales_X	Multi-affiliation	Multi-affiliation	0	0	0	0	0	0	0	0	0	0	0	0	2	0	0	0	0	0	0	0	0	0	0	0	0	0	0	0	0	0	0	0	0	0
OTU_56141	Eukaryota	Alveolata	Dinophyta	Dinophyceae	Suessiales	Suessiales_X	Woloszynskia	Woloszynskia_sp._strain1	0	0	0	0	0	1	0	0	0	0	0	0	0	0	0	0	0	0	0	0	0	0	0	0	0	0	0	0	1	0	0	0	0	0
OTU_56146	Eukaryota	Alveolata	Dinophyta	Dinophyceae	Suessiales	Suessiales_X	Woloszynskia	Woloszynskia_sp._strain1	0	0	0	0	0	0	0	0	0	0	0	0	0	0	0	0	0	1	0	0	0	0	0	0	0	0	0	0	0	0	0	0	0	0
OTU_56210	Eukaryota	Alveolata	Dinophyta	Dinophyceae	Suessiales	Suessiales_X	Woloszynskia	Woloszynskia_sp._strain1	0	0	0	0	0	0	0	0	0	1	0	0	0	0	0	0	0	0	0	0	0	0	0	0	0	0	0	0	0	0	0	1	0	0
OTU_56253	Eukaryota	Alveolata	Dinophyta	Dinophyceae	Suessiales	Suessiales_X	Woloszynskia	Woloszynskia_sp._strain1	0	0	0	0	0	0	0	1	0	1	0	0	0	0	0	0	0	0	0	0	0	0	0	0	0	0	0	0	0	0	0	0	0	0
OTU_56286	Eukaryota	Alveolata	Dinophyta	Dinophyceae	Suessiales	Suessiales_X	Woloszynskia	Woloszynskia_sp._strain1	0	0	0	0	0	0	0	0	0	0	0	0	0	0	0	0	0	0	0	0	0	0	0	0	0	0	0	0	0	1	0	0	0	0
OTU_56290	Eukaryota	Alveolata	Dinophyta	Dinophyceae	Suessiales	Suessiales_X	Woloszynskia	Woloszynskia_sp._strain1	0	0	0	0	0	0	0	0	0	0	0	0	0	0	0	0	0	0	0	0	2	0	0	0	0	0	0	0	0	0	0	0	0	0
OTU_56302	Eukaryota	Alveolata	Dinophyta	Dinophyceae	Suessiales	Suessiales_X	Woloszynskia	Woloszynskia_sp._strain1	0	0	0	0	0	0	0	0	0	0	0	0	0	0	0	0	0	0	2	0	0	0	0	0	0	0	0	0	0	0	0	0	0	0
OTU_56317	Eukaryota	Alveolata	Dinophyta	Dinophyceae	Suessiales	Suessiales_X	Woloszynskia	Woloszynskia_sp._strain1	0	0	0	0	0	0	0	0	0	1	0	0	0	0	0	0	0	0	0	0	0	1	0	0	0	0	0	0	0	0	0	0	0	0
OTU_56319	Eukaryota	Alveolata	Dinophyta	Dinophyceae	Suessiales	Suessiales_X	Woloszynskia	Woloszynskia_sp._strain1	0	1	0	0	0	0	0	0	0	0	0	0	0	0	0	0	0	0	0	0	0	0	0	0	0	0	0	0	0	0	0	0	0	1
OTU_56388	Eukaryota	Alveolata	Dinophyta	Dinophyceae	Suessiales	Suessiales_X	Woloszynskia	Woloszynskia_sp._strain1	0	0	0	0	0	0	0	0	0	0	0	0	0	1	0	0	0	0	0	0	0	0	0	0	0	0	0	0	1	0	0	0	0	0
OTU_56425	Eukaryota	Alveolata	Dinophyta	Dinophyceae	Suessiales	Suessiales_X	Woloszynskia	Woloszynskia_sp._strain1	0	0	0	0	0	0	0	0	0	0	0	0	0	0	0	0	0	0	0	0	0	0	0	0	0	0	0	0	0	1	0	0	0	0
OTU_56519	Eukaryota	Alveolata	Dinophyta	Dinophyceae	Suessiales	Suessiales_X	Woloszynskia	Woloszynskia_sp._strain1	0	0	0	0	0	0	0	0	0	1	0	0	0	0	0	0	0	0	0	0	0	0	0	1	0	0	0	0	0	0	0	0	0	0
OTU_56521	Eukaryota	Alveolata	Dinophyta	Dinophyceae	Multi-affiliation	Multi-affiliation	Multi-affiliation	Multi-affiliation	0	0	0	0	0	0	0	0	0	0	0	0	0	0	0	0	0	0	0	0	0	0	0	0	0	0	0	0	0	1	0	0	0	0
OTU_56603	Eukaryota	Alveolata	Dinophyta	Dinophyceae	Suessiales	Suessiales_X	Woloszynskia	Woloszynskia_sp._strain1	0	0	0	0	0	0	0	0	0	0	0	0	0	1	0	0	0	0	0	0	0	0	0	0	0	0	0	0	0	0	0	0	0	0
OTU_56664	Eukaryota	Alveolata	Dinophyta	Dinophyceae	Suessiales	Suessiales_X	Woloszynskia	Woloszynskia_sp._strain1	0	0	0	0	0	0	0	0	0	0	0	0	1	0	0	0	0	0	0	0	0	0	0	0	0	0	0	0	0	0	0	0	0	0
OTU_56665	Eukaryota	Alveolata	Dinophyta	Dinophyceae	Suessiales	Suessiales_X	Woloszynskia	Woloszynskia_sp._strain1	1	0	0	0	0	0	0	0	0	0	0	0	0	0	0	0	0	0	0	0	0	0	0	0	0	0	0	0	0	0	0	0	0	0
OTU_56749	Eukaryota	Alveolata	Dinophyta	Dinophyceae	Suessiales	Suessiales_X	Woloszynskia	Woloszynskia_sp._strain1	0	0	0	0	0	0	0	0	0	0	0	0	0	0	0	0	0	0	0	1	0	0	0	0	0	0	0	0	1	1	0	0	0	0
OTU_56783	Eukaryota	Alveolata	Dinophyta	Dinophyceae	Suessiales	Suessiales_X	Woloszynskia	Woloszynskia_sp._strain1	1	0	0	0	0	0	0	1	0	0	0	0	0	0	0	0	0	0	0	0	0	0	0	0	0	0	0	0	0	0	0	0	0	0
OTU_56808	Eukaryota	Alveolata	Dinophyta	Dinophyceae	Suessiales	Suessiales_X	Woloszynskia	Woloszynskia_sp._strain1	0	0	0	0	0	0	0	0	0	0	0	0	0	0	0	0	0	0	1	0	0	0	0	0	1	0	0	0	0	0	0	0	0	0
OTU_56817	Eukaryota	Alveolata	Dinophyta	Dinophyceae	Suessiales	Suessiales_X	Woloszynskia	Woloszynskia_sp._strain1	0	0	0	0	0	0	0	0	0	0	0	0	0	0	0	0	0	0	0	0	0	0	0	0	0	0	0	0	0	0	1	0	0	0
OTU_56819	Eukaryota	Alveolata	Dinophyta	Dinophyceae	Suessiales	Suessiales_X	Woloszynskia	Woloszynskia_sp._strain1	0	0	0	0	0	0	0	0	0	0	0	0	0	0	0	0	0	0	1	0	0	0	0	0	0	0	0	0	0	0	0	0	0	0
OTU_56976	Eukaryota	Alveolata	Dinophyta	Dinophyceae	Suessiales	Suessiales_X	Woloszynskia	Woloszynskia_sp._strain1	0	0	0	0	0	0	0	0	0	0	0	0	0	0	0	0	0	0	0	0	0	1	0	0	0	0	0	0	0	0	0	0	0	0
OTU_57046	Eukaryota	Alveolata	Dinophyta	Dinophyceae	Suessiales	Suessiales_X	Woloszynskia	Woloszynskia_sp._strain1	0	0	0	0	0	0	0	0	0	0	0	0	0	0	0	0	0	0	1	1	0	0	0	0	0	0	0	0	0	0	0	0	1	1
OTU_57056	Eukaryota	Alveolata	Dinophyta	Dinophyceae	Suessiales	Suessiales_X	Woloszynskia	Woloszynskia_sp._strain1	0	0	0	0	0	0	0	0	1	0	0	0	0	0	0	0	0	0	0	0	0	0	0	0	0	0	0	0	0	0	0	0	0	0
OTU_57072	Eukaryota	Alveolata	Dinophyta	Dinophyceae	Suessiales	Suessiales_X	Multi-affiliation	Multi-affiliation	0	0	0	0	0	0	0	0	0	0	0	0	0	0	0	0	0	0	0	0	0	0	0	0	0	2	0	0	0	0	0	0	0	0
OTU_57089	Eukaryota	Alveolata	Dinophyta	Dinophyceae	Suessiales	Suessiales_X	Woloszynskia	Woloszynskia_sp._strain1	0	1	0	0	0	0	0	0	0	0	0	0	0	0	0	0	0	0	0	0	0	0	0	0	0	0	1	0	0	0	0	0	0	0
OTU_57099	Eukaryota	Alveolata	Dinophyta	Dinophyceae	Suessiales	Suessiales_X	Woloszynskia	Woloszynskia_sp._strain1	0	0	0	0	0	0	0	1	0	0	0	0	0	0	0	0	0	0	0	0	0	0	0	0	0	0	0	0	0	0	0	0	0	0
OTU_57114	Eukaryota	Alveolata	Dinophyta	Dinophyceae	Suessiales	Suessiales_X	Woloszynskia	Woloszynskia_sp._strain1	0	0	0	0	0	0	0	0	1	0	0	0	0	0	0	0	0	0	0	0	0	0	0	0	0	0	0	0	0	0	0	0	0	0
OTU_57152	Eukaryota	Alveolata	Dinophyta	Dinophyceae	Suessiales	Suessiales_X	Woloszynskia	Woloszynskia_sp._strain1	0	0	0	0	0	0	0	0	0	0	1	0	0	0	0	0	0	0	0	0	0	0	0	0	0	0	0	0	0	1	0	0	0	0
OTU_57173	Eukaryota	Alveolata	Dinophyta	Dinophyceae	Suessiales	Suessiales_X	Woloszynskia	Woloszynskia_sp._strain1	0	0	0	0	0	0	0	0	0	0	0	0	0	0	0	0	0	0	0	0	0	0	0	0	1	0	0	0	0	1	0	0	0	0
OTU_57220	Eukaryota	Alveolata	Dinophyta	Dinophyceae	Suessiales	Suessiales_X	Woloszynskia	Woloszynskia_sp._strain1	0	0	0	0	0	0	0	1	0	0	0	0	0	0	0	0	0	0	0	0	0	0	0	0	0	0	0	0	0	0	0	0	0	0
OTU_57332	Eukaryota	Alveolata	Dinophyta	Dinophyceae	Suessiales	Suessiales_X	Woloszynskia	Woloszynskia_sp._strain1	0	0	0	0	0	0	0	0	0	0	0	0	0	0	0	0	0	1	0	0	0	0	0	0	0	0	0	0	0	1	0	0	0	0
OTU_57390	Eukaryota	Alveolata	Dinophyta	Dinophyceae	Suessiales	Suessiales_X	Woloszynskia	Woloszynskia_sp._strain1	0	0	0	1	0	0	0	0	0	0	0	0	0	0	0	0	0	0	0	0	0	0	0	0	0	0	0	0	0	1	0	0	0	0
OTU_57450	Eukaryota	Alveolata	Dinophyta	Dinophyceae	Suessiales	Suessiales_X	Woloszynskia	Woloszynskia_sp._strain1	0	0	0	1	0	0	0	0	0	0	0	0	0	0	0	0	0	0	0	0	0	0	0	0	0	0	0	0	0	0	0	0	0	0
OTU_57455	Eukaryota	Alveolata	Dinophyta	Dinophyceae	Suessiales	Suessiales_X	Woloszynskia	Woloszynskia_sp._strain1	0	0	0	0	0	0	0	0	0	0	0	0	0	0	0	0	0	0	0	0	0	0	0	0	0	1	0	0	0	0	0	0	0	0
OTU_57476	Eukaryota	Alveolata	Dinophyta	Dinophyceae	Suessiales	Suessiales_X	Woloszynskia	Woloszynskia_sp._strain1	0	0	0	0	0	0	0	1	0	0	0	0	0	0	0	0	0	0	0	0	0	0	0	0	1	0	0	0	0	0	1	0	0	0
OTU_57496	Eukaryota	Alveolata	Dinophyta	Dinophyceae	Suessiales	Suessiales_X	Woloszynskia	Woloszynskia_sp._strain1	0	0	0	0	0	0	0	0	0	2	0	0	0	0	0	0	0	0	0	0	0	0	0	0	0	0	0	0	0	0	0	0	0	0
OTU_57588	Eukaryota	Alveolata	Dinophyta	Dinophyceae	Suessiales	Suessiales_X	Woloszynskia	Woloszynskia_sp._strain1	0	0	0	0	0	1	1	0	0	0	0	0	0	0	0	0	0	0	0	0	0	0	0	0	0	1	0	0	0	0	0	0	0	0
OTU_57595	Eukaryota	Alveolata	Dinophyta	Dinophyceae	Suessiales	Suessiales_X	Woloszynskia	Woloszynskia_sp._strain1	0	0	0	0	0	0	0	0	0	0	0	0	0	0	0	0	0	0	0	0	0	0	0	0	0	0	0	0	0	0	0	0	1	0
OTU_57616	Eukaryota	Alveolata	Dinophyta	Dinophyceae	Suessiales	Suessiales_X	Woloszynskia	Woloszynskia_sp._strain1	0	0	0	0	0	1	0	0	0	0	0	0	0	0	0	0	0	0	0	0	0	0	0	0	0	0	0	0	0	0	0	0	0	0
OTU_57651	Eukaryota	Alveolata	Dinophyta	Dinophyceae	Suessiales	Suessiales_X	Woloszynskia	Woloszynskia_sp._strain1	0	0	0	0	0	0	0	0	0	0	0	0	0	0	0	0	0	0	0	0	0	0	0	0	0	1	0	0	0	0	0	0	0	0
OTU_57831	Eukaryota	Alveolata	Dinophyta	Dinophyceae	Suessiales	Suessiales_X	Woloszynskia	Woloszynskia_sp._strain1	1	0	0	0	0	0	0	0	0	0	0	0	0	0	0	0	0	0	0	0	0	0	0	0	0	0	0	0	0	0	0	1	0	0
OTU_57855	Eukaryota	Alveolata	Dinophyta	Dinophyceae	Suessiales	Suessiales_X	Woloszynskia	Woloszynskia_sp._strain1	1	0	0	0	0	1	0	0	0	0	0	0	0	0	0	0	0	0	0	0	0	0	0	0	0	1	0	0	0	0	0	0	0	0
OTU_57872	Eukaryota	Alveolata	Dinophyta	Dinophyceae	Suessiales	Suessiales_X	Woloszynskia	Woloszynskia_sp._strain1	0	0	0	0	0	0	0	0	0	0	0	0	0	0	0	0	0	0	0	0	0	0	0	0	0	0	0	0	0	0	0	0	2	0
OTU_57894	Eukaryota	Alveolata	Dinophyta	Dinophyceae	Suessiales	Suessiales_X	Woloszynskia	Woloszynskia_sp._strain1	0	0	0	0	0	0	0	0	0	0	0	0	0	0	0	0	0	0	0	0	0	0	0	0	0	0	0	0	0	0	0	0	1	0
OTU_57969	Eukaryota	Alveolata	Dinophyta	Dinophyceae	Suessiales	Suessiales_X	Woloszynskia	Woloszynskia_sp._strain1	0	0	0	0	0	0	0	1	0	0	0	0	0	0	0	0	0	0	0	0	0	0	0	0	1	0	0	0	0	0	0	0	0	0
OTU_57972	Eukaryota	Alveolata	Dinophyta	Dinophyceae	Suessiales	Suessiales_X	Woloszynskia	Woloszynskia_sp._strain1	0	1	1	0	0	0	0	0	0	0	0	0	0	0	0	0	0	0	0	0	0	0	0	0	0	0	0	0	0	0	0	0	0	0
OTU_58012	Eukaryota	Alveolata	Dinophyta	Dinophyceae	Suessiales	Suessiales_X	Woloszynskia	Woloszynskia_sp._strain1	0	0	0	0	0	0	0	0	0	0	0	0	0	0	0	0	0	0	0	1	0	0	0	0	0	0	0	0	0	0	0	0	0	0
OTU_58124	Eukaryota	Alveolata	Dinophyta	Dinophyceae	Suessiales	Suessiales_X	Woloszynskia	Woloszynskia_sp._strain1	0	0	0	0	0	0	0	0	0	0	0	0	0	0	0	0	0	0	0	1	0	0	0	0	0	0	0	0	0	0	0	0	0	0
OTU_58169	Eukaryota	Alveolata	Dinophyta	Dinophyceae	Suessiales	Suessiales_X	Woloszynskia	Woloszynskia_sp._strain1	0	0	0	0	0	0	0	0	0	0	0	0	0	0	0	0	0	0	0	0	0	0	0	0	1	0	1	0	0	1	0	0	0	0
OTU_58187	Eukaryota	Alveolata	Dinophyta	Dinophyceae	Suessiales	Suessiales_X	Woloszynskia	Woloszynskia_sp._strain1	0	0	0	0	0	0	0	0	0	0	0	0	0	0	0	0	0	1	0	0	0	0	0	0	0	0	0	0	0	0	0	0	0	0
OTU_58198	Eukaryota	Alveolata	Dinophyta	Dinophyceae	Suessiales	Suessiales_X	Woloszynskia	Woloszynskia_sp._strain1	0	0	0	0	0	0	0	0	0	0	0	0	0	1	0	0	0	0	0	0	0	1	0	0	1	0	0	0	0	0	0	0	0	0
OTU_58204	Eukaryota	Alveolata	Dinophyta	Dinophyceae	Suessiales	Suessiales_X	Woloszynskia	Woloszynskia_sp._strain1	1	0	0	1	0	0	0	0	0	0	0	0	0	0	0	0	0	0	0	0	0	0	0	0	0	0	0	0	0	0	0	0	0	0
OTU_58226	Eukaryota	Alveolata	Dinophyta	Dinophyceae	Suessiales	Suessiales_X	Woloszynskia	Woloszynskia_sp._strain1	0	0	0	0	0	2	0	0	0	0	0	0	0	0	0	0	0	0	0	0	0	0	0	0	0	0	0	0	0	0	0	0	0	0
OTU_58276	Eukaryota	Alveolata	Dinophyta	Dinophyceae	Suessiales	Suessiales_X	Woloszynskia	Woloszynskia_sp._strain1	1	0	0	0	0	0	0	0	0	0	0	0	0	0	0	0	0	0	0	0	0	0	0	0	0	0	0	0	0	0	0	1	0	0
OTU_58279	Eukaryota	Alveolata	Dinophyta	Dinophyceae	Suessiales	Suessiales_X	Woloszynskia	Woloszynskia_sp._strain1	1	0	0	0	0	0	0	0	0	0	0	0	0	0	0	0	0	0	0	0	0	0	0	0	0	0	0	0	0	0	0	0	0	0
OTU_58333	Eukaryota	Alveolata	Dinophyta	Dinophyceae	Suessiales	Suessiales_X	Woloszynskia	Woloszynskia_sp._strain1	0	0	0	0	0	0	0	0	0	0	0	0	0	0	0	0	0	0	0	0	0	0	0	0	1	1	0	0	0	0	0	0	0	0
OTU_58341	Eukaryota	Alveolata	Dinophyta	Dinophyceae	Suessiales	Suessiales_X	Woloszynskia	Woloszynskia_sp._strain1	0	0	0	0	0	0	0	0	0	0	0	0	0	0	0	0	0	0	0	0	0	1	0	0	1	0	0	0	0	0	0	0	0	0
OTU_58348	Eukaryota	Alveolata	Dinophyta	Dinophyceae	Suessiales	Suessiales_X	Woloszynskia	Woloszynskia_sp._strain1	0	1	0	0	0	0	0	0	0	0	0	0	0	0	0	0	0	0	0	0	0	0	0	0	0	0	0	0	0	0	0	0	0	0
OTU_58364	Eukaryota	Alveolata	Dinophyta	Dinophyceae	Suessiales	Suessiales_X	Woloszynskia	Woloszynskia_sp._strain1	0	0	0	0	0	0	0	0	1	0	0	0	0	0	0	0	0	0	0	0	0	1	0	0	0	0	0	0	0	0	0	0	0	0
OTU_58429	Eukaryota	Alveolata	Dinophyta	Dinophyceae	Suessiales	Suessiales_X	Woloszynskia	Woloszynskia_sp._strain1	0	0	0	0	0	1	0	0	0	0	0	0	0	0	0	0	0	0	0	0	0	0	0	0	0	0	0	0	0	1	0	0	0	0
OTU_58432	Eukaryota	Alveolata	Dinophyta	Dinophyceae	Suessiales	Suessiales_X	Woloszynskia	Woloszynskia_sp._strain1	0	1	0	1	0	0	0	0	0	0	0	0	0	0	0	0	0	0	0	0	0	0	0	0	0	0	0	0	0	0	0	0	0	0
OTU_58459	Eukaryota	Alveolata	Dinophyta	Dinophyceae	Suessiales	Suessiales_X	Woloszynskia	Woloszynskia_sp._strain1	0	0	0	1	0	0	0	0	0	0	0	0	0	0	0	0	0	0	0	0	0	0	0	0	0	0	0	0	0	0	1	0	0	0
OTU_58461	Eukaryota	Alveolata	Dinophyta	Dinophyceae	Suessiales	Suessiales_X	Woloszynskia	Woloszynskia_sp._strain1	0	0	0	0	0	0	0	0	0	0	0	0	1	0	0	0	0	0	0	0	0	0	0	0	0	0	0	0	0	0	0	0	0	0
OTU_58498	Eukaryota	Alveolata	Dinophyta	Dinophyceae	Suessiales	Suessiales_X	Woloszynskia	Woloszynskia_sp._strain1	0	0	0	0	0	1	0	0	0	0	0	0	0	0	0	0	0	0	0	0	0	1	0	0	0	0	0	0	0	0	0	1	0	0
OTU_58523	Eukaryota	Alveolata	Dinophyta	Dinophyceae	Suessiales	Suessiales_X	Woloszynskia	Woloszynskia_sp._strain1	1	0	0	0	0	0	0	0	0	0	0	0	1	0	0	0	0	0	0	0	0	0	0	0	0	0	0	0	0	0	0	0	0	0
OTU_58527	Eukaryota	Alveolata	Dinophyta	Dinophyceae	Suessiales	Suessiales_X	Woloszynskia	Woloszynskia_sp._strain1	0	0	0	0	0	0	0	0	0	1	0	0	0	0	0	0	0	0	0	0	0	0	0	0	1	0	0	0	0	0	0	0	0	0
OTU_58528	Eukaryota	Alveolata	Dinophyta	Dinophyceae	Suessiales	Suessiales_X	Woloszynskia	Woloszynskia_sp._strain1	2	1	0	0	0	0	0	0	0	0	0	0	0	0	0	0	0	0	0	0	0	0	0	0	0	0	0	0	0	0	0	0	0	0
OTU_58530	Eukaryota	Alveolata	Dinophyta	Dinophyceae	Suessiales	Suessiales_X	Woloszynskia	Woloszynskia_sp._strain1	0	0	0	0	0	0	0	0	0	0	0	0	1	0	0	0	0	0	1	0	0	0	0	0	0	0	0	0	0	0	0	0	0	0
OTU_58637	Eukaryota	Alveolata	Dinophyta	Dinophyceae	Suessiales	Suessiales_X	Pelagodinium	Multi-affiliation	0	0	0	0	0	0	0	0	0	0	0	0	0	0	0	0	0	0	0	0	0	1	0	0	0	0	0	0	0	1	0	0	0	0
OTU_58639	Eukaryota	Alveolata	Dinophyta	Dinophyceae	Suessiales	Suessiales_X	Woloszynskia	Woloszynskia_sp._strain1	0	1	0	0	0	1	0	0	0	0	0	0	0	0	0	0	0	0	0	0	0	0	0	0	0	0	0	0	0	0	0	0	1	0
OTU_58649	Eukaryota	Alveolata	Dinophyta	Dinophyceae	Suessiales	Suessiales_X	Woloszynskia	Woloszynskia_sp._strain1	0	0	0	0	0	0	0	0	0	0	2	0	0	0	0	0	0	0	0	0	0	0	0	0	0	0	0	0	0	0	0	0	0	0
OTU_58684	Eukaryota	Alveolata	Dinophyta	Dinophyceae	Suessiales	Suessiales_X	Woloszynskia	Woloszynskia_sp._strain1	0	0	0	0	0	1	0	0	0	1	0	0	0	0	0	0	0	0	0	0	0	0	0	0	0	0	0	0	0	0	0	0	0	0
OTU_58695	Eukaryota	Alveolata	Dinophyta	Dinophyceae	Suessiales	Suessiales_X	Woloszynskia	Woloszynskia_sp._strain1	0	0	0	0	0	0	0	0	0	1	0	0	0	0	0	0	0	0	0	0	0	0	0	0	0	0	0	0	0	0	0	0	0	0
OTU_58697	Eukaryota	Alveolata	Dinophyta	Dinophyceae	Suessiales	Suessiales_X	Woloszynskia	Woloszynskia_sp._strain1	0	0	0	0	0	0	0	0	0	0	0	0	0	0	0	0	0	0	0	0	0	1	0	0	0	0	0	0	0	0	0	0	0	0
OTU_58727	Eukaryota	Alveolata	Dinophyta	Dinophyceae	Suessiales	Suessiales_X	Woloszynskia	Woloszynskia_sp._strain1	0	0	0	1	0	0	0	0	0	0	0	0	0	0	0	0	1	0	0	0	0	0	0	0	0	0	0	0	0	0	0	0	0	0
OTU_58748	Eukaryota	Alveolata	Dinophyta	Dinophyceae	Suessiales	Suessiales_X	Woloszynskia	Woloszynskia_sp._strain1	1	0	0	0	0	0	0	0	0	0	0	0	0	0	0	0	0	0	0	0	0	0	0	0	0	0	0	0	0	0	0	0	0	0
OTU_59056	Eukaryota	Alveolata	Dinophyta	Dinophyceae	Suessiales	Suessiales_X	Woloszynskia	Woloszynskia_sp._strain1	0	0	0	1	0	0	0	0	0	0	0	0	0	0	0	0	0	0	0	1	0	0	0	0	0	0	0	0	0	0	0	0	0	0
OTU_59196	Eukaryota	Alveolata	Dinophyta	Dinophyceae	Suessiales	Suessiales_X	Woloszynskia	Woloszynskia_sp._strain1	0	0	0	0	0	0	0	0	0	0	0	0	0	0	0	0	0	1	0	0	0	1	0	0	0	0	0	0	0	0	0	0	0	0
OTU_59377	Eukaryota	Alveolata	Dinophyta	Dinophyceae	Suessiales	Suessiales_X	Woloszynskia	Woloszynskia_sp._strain1	0	0	0	0	0	0	0	0	2	0	0	0	0	0	0	0	0	0	0	0	0	0	0	0	0	0	0	0	0	0	0	0	0	0
OTU_59414	Eukaryota	Alveolata	Dinophyta	Dinophyceae	Suessiales	Suessiales_X	Woloszynskia	Woloszynskia_sp._strain1	0	0	0	0	0	0	0	0	1	0	0	0	0	0	0	0	0	0	0	0	0	0	0	0	0	1	0	0	0	0	0	0	0	0
OTU_59587	Eukaryota	Alveolata	Dinophyta	Dinophyceae	Suessiales	Suessiales_X	Woloszynskia	Woloszynskia_sp._strain1	0	0	0	0	0	0	0	0	0	0	0	0	0	0	0	0	0	0	0	0	0	0	0	0	0	0	0	0	0	0	0	0	2	0
OTU_59647	Eukaryota	Alveolata	Dinophyta	Dinophyceae	Suessiales	Suessiales_X	Woloszynskia	Woloszynskia_sp._strain1	0	0	0	0	0	0	0	0	0	0	0	0	0	0	0	0	0	0	0	0	0	0	0	0	0	0	0	0	0	0	1	0	0	0
OTU_59703	Eukaryota	Alveolata	Dinophyta	Dinophyceae	Suessiales	Suessiales_X	Woloszynskia	Woloszynskia_sp._strain1	0	0	0	0	0	0	0	0	0	0	0	0	1	0	0	0	0	0	0	0	0	0	0	0	0	0	1	0	0	0	0	0	0	0
OTU_59910	Eukaryota	Alveolata	Dinophyta	Dinophyceae	Suessiales	Suessiales_X	Woloszynskia	Woloszynskia_sp._strain1	0	0	0	0	0	0	0	0	0	1	0	0	0	0	0	0	0	0	0	0	0	0	0	0	0	0	0	0	0	0	0	0	0	0
OTU_60033	Eukaryota	Alveolata	Dinophyta	Dinophyceae	Suessiales	Suessiales_X	Woloszynskia	Woloszynskia_sp._strain1	1	0	0	0	0	0	0	0	0	0	0	0	0	0	0	0	0	0	0	0	0	0	0	0	0	0	0	0	0	0	0	0	0	0
OTU_60209	Eukaryota	Alveolata	Dinophyta	Dinophyceae	Suessiales	Suessiales_X	Woloszynskia	Woloszynskia_sp._strain1	0	0	0	0	0	0	0	0	0	0	0	0	0	0	0	0	1	0	0	0	0	0	0	0	0	0	0	0	0	0	0	0	0	0
OTU_60240	Eukaryota	Alveolata	Dinophyta	Dinophyceae	Suessiales	Suessiales_X	Woloszynskia	Woloszynskia_sp._strain1	0	0	0	0	0	0	0	0	0	0	0	0	0	0	0	0	0	0	0	0	0	1	0	0	0	1	0	0	0	0	0	0	0	0
OTU_60279	Eukaryota	Alveolata	Dinophyta	Dinophyceae	Suessiales	Suessiales_X	Woloszynskia	Woloszynskia_sp._strain1	0	0	0	0	0	0	0	0	0	0	0	0	0	0	0	0	0	0	0	0	0	0	0	0	0	0	0	0	2	0	0	0	0	0
OTU_60304	Eukaryota	Alveolata	Dinophyta	Dinophyceae	Suessiales	Suessiales_X	Woloszynskia	Woloszynskia_sp._strain1	0	0	0	0	0	0	0	2	0	0	0	0	0	0	0	0	1	0	0	0	0	0	0	0	0	0	0	0	0	0	0	0	0	0
OTU_60521	Eukaryota	Alveolata	Dinophyta	Dinophyceae	Multi-affiliation	Multi-affiliation	Multi-affiliation	Multi-affiliation	0	0	0	0	0	0	0	0	0	0	0	0	0	0	0	0	0	0	0	0	0	0	0	0	0	0	0	0	0	2	0	0	0	0
OTU_60765	Eukaryota	Alveolata	Dinophyta	Dinophyceae	Suessiales	Suessiales_X	Woloszynskia	Woloszynskia_sp._strain1	0	0	0	0	0	0	0	0	0	1	0	0	0	0	0	0	0	0	0	0	0	0	0	0	0	0	0	0	0	0	0	0	0	1
OTU_60876	Eukaryota	Alveolata	Dinophyta	Dinophyceae	Suessiales	Suessiales_X	Woloszynskia	Woloszynskia_sp._strain1	0	0	0	0	0	1	0	0	0	0	0	0	0	0	0	0	0	0	0	0	0	0	0	0	0	1	0	0	0	0	0	0	0	0
OTU_60892	Eukaryota	Alveolata	Dinophyta	Dinophyceae	Suessiales	Suessiales_X	Woloszynskia	Woloszynskia_sp._strain1	1	0	0	0	0	0	0	0	0	0	0	0	1	0	0	0	0	0	0	0	0	0	0	0	0	0	0	0	0	0	0	0	0	0
OTU_61065	Eukaryota	Alveolata	Dinophyta	Dinophyceae	Suessiales	Suessiales_X	Woloszynskia	Woloszynskia_sp._strain1	0	0	0	0	0	0	0	0	0	0	0	0	0	0	0	0	0	0	0	0	0	0	0	0	0	0	0	0	0	1	0	0	0	0
OTU_61366	Eukaryota	Alveolata	Dinophyta	Dinophyceae	Suessiales	Suessiales_X	Woloszynskia	Woloszynskia_sp._strain1	1	0	0	0	0	0	0	0	0	0	0	0	0	0	0	0	0	0	0	0	0	0	0	0	0	0	0	0	0	0	0	0	0	0
OTU_61379	Eukaryota	Alveolata	Dinophyta	Dinophyceae	Suessiales	Suessiales_X	Woloszynskia	Woloszynskia_sp._strain1	0	0	0	0	0	0	0	1	0	0	0	0	0	0	0	0	0	0	0	0	0	0	0	0	0	0	0	0	0	0	0	0	0	0
OTU_61448	Eukaryota	Alveolata	Dinophyta	Dinophyceae	Multi-affiliation	Multi-affiliation	Multi-affiliation	Multi-affiliation	0	0	0	0	0	0	0	0	0	0	0	0	0	0	0	0	0	0	0	0	0	0	0	0	0	0	0	0	0	1	0	0	0	0
OTU_61456	Eukaryota	Alveolata	Dinophyta	Dinophyceae	Suessiales	Suessiales_X	Multi-affiliation	Multi-affiliation	0	0	0	0	0	0	0	0	0	0	0	0	0	0	0	0	0	0	0	0	0	1	0	0	0	0	0	0	0	0	0	0	0	0
OTU_61535	Eukaryota	Alveolata	Dinophyta	Dinophyceae	Suessiales	Suessiales_X	Woloszynskia	Woloszynskia_sp._strain1	0	0	0	0	0	0	0	0	0	0	1	0	0	0	0	0	0	0	0	0	0	0	0	0	0	0	0	0	0	0	0	0	0	0
OTU_61644	Eukaryota	Alveolata	Dinophyta	Dinophyceae	Suessiales	Suessiales_X	Woloszynskia	Woloszynskia_sp._strain1	0	0	0	0	0	0	0	0	0	0	0	0	0	0	0	0	0	0	0	0	0	0	0	0	0	0	0	0	0	0	0	2	0	0
OTU_61760	Eukaryota	Alveolata	Dinophyta	Dinophyceae	Suessiales	Suessiales_X	Woloszynskia	Woloszynskia_sp._strain1	0	0	0	0	0	1	0	0	0	0	0	0	0	0	0	0	1	0	0	0	0	0	0	0	0	0	0	0	0	0	0	0	0	0
OTU_61810	Eukaryota	Alveolata	Dinophyta	Dinophyceae	Dinophyceae_X	Dinophyceae_XX	Dinophyceae_XXX	Dinophyceae_XXX_sp.	2	0	0	0	0	0	0	0	0	0	0	0	0	0	0	0	0	0	0	0	0	0	0	0	0	0	0	0	0	0	0	0	0	0
OTU_62063	Eukaryota	Alveolata	Dinophyta	Dinophyceae	Suessiales	Suessiales_X	Woloszynskia	Woloszynskia_sp._strain1	0	0	0	0	0	0	0	0	0	0	0	0	0	1	0	0	0	0	0	0	0	0	0	0	0	0	0	0	0	0	0	0	0	0
OTU_62107	Eukaryota	Alveolata	Dinophyta	Dinophyceae	Suessiales	Suessiales_X	Woloszynskia	Woloszynskia_sp._strain1	0	0	0	0	0	0	0	0	0	0	0	0	0	0	0	0	0	1	0	0	0	0	0	0	0	0	0	0	0	0	1	0	0	0
OTU_62652	Eukaryota	Alveolata	Dinophyta	Dinophyceae	Suessiales	Suessiales_X	Woloszynskia	Woloszynskia_sp._strain1	0	0	0	0	0	0	0	0	0	0	0	0	0	0	0	0	0	0	0	0	0	0	0	0	0	1	0	0	0	0	0	0	0	0
OTU_62864	Eukaryota	Alveolata	Dinophyta	Dinophyceae	Suessiales	Suessiales_X	Woloszynskia	Woloszynskia_sp._strain1	0	0	1	0	0	0	0	0	1	0	0	0	0	0	0	0	0	0	0	0	0	0	0	0	0	0	0	0	0	0	0	0	0	0
OTU_62997	Eukaryota	Alveolata	Dinophyta	Dinophyceae	Suessiales	Suessiales_X	Suessiales_XX	Suessiales_XX_sp.	0	0	0	0	0	0	0	0	0	0	0	0	0	0	0	0	0	0	0	1	0	0	0	0	0	0	0	0	0	1	0	0	0	0
OTU_63169	Eukaryota	Alveolata	Dinophyta	Dinophyceae	Suessiales	Suessiales_X	Woloszynskia	Woloszynskia_sp._strain1	0	0	0	0	0	0	0	0	0	0	0	0	0	0	0	0	0	0	0	0	0	0	0	0	1	0	0	0	0	0	0	0	0	0
OTU_63198	Eukaryota	Alveolata	Dinophyta	Dinophyceae	Suessiales	Suessiales_X	Woloszynskia	Woloszynskia_sp._strain1	0	0	0	0	0	0	0	0	0	0	0	0	0	0	0	0	0	1	0	1	0	0	0	0	0	0	0	0	0	0	0	0	0	0
OTU_63223	Eukaryota	Alveolata	Dinophyta	Dinophyceae	Suessiales	Suessiales_X	Woloszynskia	Woloszynskia_sp._strain1	0	0	0	0	0	0	0	0	0	0	0	0	0	0	0	0	0	0	0	0	0	0	0	0	0	0	0	0	2	0	0	0	0	0
OTU_63232	Eukaryota	Alveolata	Dinophyta	Dinophyceae	Suessiales	Suessiales_X	Woloszynskia	Woloszynskia_sp._strain1	0	0	0	1	0	0	0	0	0	0	0	0	0	0	0	0	0	0	0	1	0	0	0	0	0	0	0	0	0	0	0	0	0	0
OTU_63282	Eukaryota	Alveolata	Dinophyta	Dinophyceae	Suessiales	Suessiales_X	Suessiales_XX	Suessiales_XX_sp.	0	0	0	0	0	0	0	0	0	0	0	0	0	0	0	0	0	0	0	1	0	0	0	0	0	0	0	0	0	0	0	0	2	0
OTU_63299	Eukaryota	Alveolata	Dinophyta	Dinophyceae	Suessiales	Suessiales_X	Suessiales_XX	Suessiales_XX_sp.	0	0	0	0	0	0	0	0	0	0	0	0	0	0	0	0	0	0	0	0	0	0	0	0	0	0	0	0	1	0	0	0	0	0
OTU_63470	Eukaryota	Alveolata	Dinophyta	Dinophyceae	Suessiales	Suessiales_X	Woloszynskia	Woloszynskia_sp._strain1	0	0	0	1	0	0	0	0	0	0	0	0	0	0	0	0	0	0	0	0	0	0	0	0	0	0	0	0	0	0	0	0	0	0
OTU_63570	Eukaryota	Multi-affiliation	Multi-affiliation	Multi-affiliation	Multi-affiliation	Multi-affiliation	Multi-affiliation	Multi-affiliation	0	0	0	0	0	0	0	0	0	0	0	0	0	0	0	0	0	0	0	0	0	0	0	0	2	0	0	0	0	0	0	0	0	0
OTU_63591	Eukaryota	Multi-affiliation	Multi-affiliation	Multi-affiliation	Multi-affiliation	Multi-affiliation	Multi-affiliation	Multi-affiliation	0	0	0	0	0	0	0	0	0	0	0	0	0	0	0	0	1	0	0	0	0	0	0	0	0	0	0	0	0	0	0	0	0	0
OTU_63610	Eukaryota	Multi-affiliation	Multi-affiliation	Multi-affiliation	Multi-affiliation	Multi-affiliation	Multi-affiliation	Multi-affiliation	0	0	0	0	0	1	0	0	0	0	0	0	0	0	0	0	0	0	0	0	0	0	0	0	1	0	0	0	0	0	0	0	0	0
OTU_63625	Eukaryota	Multi-affiliation	Multi-affiliation	Multi-affiliation	Multi-affiliation	Multi-affiliation	Multi-affiliation	Multi-affiliation	0	0	0	0	0	0	0	0	0	0	0	0	0	0	0	0	0	0	0	0	0	0	0	0	1	1	0	0	0	0	0	0	0	0
OTU_63762	Eukaryota	Alveolata	Dinophyta	Dinophyceae	Suessiales	Suessiales_X	Woloszynskia	Woloszynskia_sp._strain1	0	0	0	0	0	0	0	1	0	0	0	0	0	0	0	0	0	0	0	0	0	0	0	0	0	0	0	0	0	0	1	0	0	0
OTU_64233	Eukaryota	Alveolata	Dinophyta	Dinophyceae	Suessiales	Suessiales_X	Woloszynskia	Woloszynskia_sp._strain1	0	0	0	0	0	1	0	0	0	0	0	0	0	0	0	0	0	0	0	0	0	0	0	0	0	0	0	0	0	0	0	0	0	0
OTU_64234	Eukaryota	Alveolata	Dinophyta	Dinophyceae	Suessiales	Suessiales_X	Woloszynskia	Woloszynskia_sp._strain1	1	0	0	0	0	0	0	0	0	0	0	0	0	0	0	0	0	0	0	0	0	0	0	0	0	1	0	0	0	0	0	0	0	0
OTU_64308	Eukaryota	Alveolata	Dinophyta	Dinophyceae	Suessiales	Suessiales_X	Woloszynskia	Woloszynskia_sp._strain1	0	0	0	0	0	0	0	0	0	0	0	0	0	0	0	0	0	0	0	0	0	0	0	0	0	0	0	0	0	2	0	0	0	0
OTU_64392	Eukaryota	Alveolata	Dinophyta	Dinophyceae	Suessiales	Suessiales_X	Suessiales_XX	Suessiales_XX_sp.	0	0	0	1	0	0	0	0	0	0	0	0	0	0	0	0	0	0	0	0	0	0	0	0	0	0	0	0	0	0	0	0	0	0
OTU_64415	Eukaryota	Alveolata	Dinophyta	Dinophyceae	Suessiales	Suessiales_X	Suessiales_XX	Suessiales_XX_sp.	0	0	0	0	0	0	0	1	1	0	0	0	0	0	0	0	0	0	0	0	0	0	0	0	0	0	0	0	0	0	0	0	0	0
OTU_64496	Eukaryota	Alveolata	Dinophyta	Dinophyceae	Suessiales	Suessiales_X	Suessiales_XX	Suessiales_XX_sp.	0	0	0	0	0	0	0	0	1	0	0	0	0	0	0	0	0	0	0	0	0	0	0	0	0	0	0	0	1	0	0	0	0	0
OTU_64579	Eukaryota	Alveolata	Dinophyta	Dinophyceae	Suessiales	Suessiales_X	Suessiales_XX	Suessiales_XX_sp.	0	0	0	0	0	0	0	0	0	0	0	0	0	0	0	0	0	0	0	0	0	0	0	0	0	0	0	2	0	0	0	0	0	0
OTU_64773	Eukaryota	Alveolata	Dinophyta	Dinophyceae	Suessiales	Suessiales_X	Suessiales_XX	Suessiales_XX_sp.	0	0	0	0	0	0	0	0	0	0	0	0	0	0	0	0	0	0	0	0	0	0	0	0	0	0	0	0	0	0	0	2	0	0
OTU_64801	Eukaryota	Alveolata	Dinophyta	Dinophyceae	Suessiales	Suessiales_X	Suessiales_XX	Suessiales_XX_sp.	0	0	0	1	0	0	0	0	0	0	0	0	0	0	0	0	0	0	0	0	0	0	0	0	0	0	0	0	0	0	0	0	0	0
OTU_64961	Eukaryota	Alveolata	Dinophyta	Dinophyceae	Suessiales	Suessiales_X	Suessiales_XX	Suessiales_XX_sp.	0	0	0	0	0	0	0	0	0	0	0	0	0	0	0	0	0	0	0	0	2	0	0	0	0	0	0	0	0	0	0	0	0	0
OTU_65165	Eukaryota	Alveolata	Dinophyta	Dinophyceae	Suessiales	Suessiales_X	Symbiodinium	Multi-affiliation	0	0	0	0	0	0	0	0	0	0	0	0	0	0	0	0	0	0	0	0	0	0	0	0	1	0	0	0	1	0	0	0	0	0
OTU_65813	Eukaryota	Alveolata	Dinophyta	Dinophyceae	Multi-affiliation	Multi-affiliation	Multi-affiliation	Multi-affiliation	0	0	0	0	0	0	0	0	0	0	0	0	0	0	0	0	0	0	0	0	0	0	0	0	1	0	0	1	0	0	0	0	0	0
OTU_65935	Eukaryota	Alveolata	Dinophyta	Dinophyceae	Suessiales	Suessiales_X	Woloszynskia	Woloszynskia_sp._strain1	0	0	0	0	0	1	0	1	0	0	0	0	0	0	0	0	0	0	0	0	0	0	0	0	0	0	0	0	0	0	0	0	0	0
OTU_66300	Eukaryota	Alveolata	Dinophyta	Dinophyceae	Suessiales	Suessiales_X	Woloszynskia	Woloszynskia_sp._strain1	0	0	0	0	0	0	0	0	0	3	0	0	0	0	0	0	0	0	0	0	0	0	0	0	0	0	0	0	0	0	0	0	0	0
OTU_66851	Eukaryota	Alveolata	Dinophyta	Dinophyceae	Suessiales	Suessiales_X	Woloszynskia	Woloszynskia_sp._strain1	0	0	0	0	0	0	0	1	0	0	0	0	1	0	0	0	0	0	0	0	0	0	0	0	0	0	0	0	0	0	0	0	0	0
OTU_66965	Eukaryota	Alveolata	Dinophyta	Dinophyceae	Suessiales	Suessiales_X	Woloszynskia	Woloszynskia_sp._strain1	0	0	0	0	0	1	0	0	0	0	0	0	0	0	0	0	0	0	0	0	0	0	0	0	0	0	0	0	0	1	0	0	0	0
OTU_67477	Eukaryota	Alveolata	Dinophyta	Dinophyceae	Suessiales	Suessiales_X	Woloszynskia	Woloszynskia_sp._strain1	0	0	0	0	0	0	0	0	0	0	0	1	0	0	0	0	0	0	0	0	0	0	0	0	1	0	0	0	0	0	0	0	0	0
OTU_67669	Eukaryota	Alveolata	Dinophyta	Syndiniales	Dino-Group-II	Dino-Group-II-Clade-22	Dino-Group-II-Clade-22_X	Dino-Group-II-Clade-22_X_sp.	3	0	0	0	0	0	0	0	0	0	0	0	0	0	0	0	0	0	0	0	0	0	0	0	0	0	0	0	0	0	0	0	0	0
OTU_67747	Eukaryota	Multi-affiliation	Multi-affiliation	Multi-affiliation	Multi-affiliation	Multi-affiliation	Multi-affiliation	Multi-affiliation	0	0	1	0	0	0	1	0	0	0	0	0	0	0	0	0	0	0	0	0	0	0	0	0	0	0	0	0	0	0	0	0	0	0
OTU_68155	Eukaryota	Alveolata	Dinophyta	Dinophyceae	Suessiales	Suessiales_X	Woloszynskia	Woloszynskia_sp._strain1	1	0	0	0	0	0	0	0	0	0	0	0	0	0	0	0	0	0	0	0	0	0	0	0	0	1	0	0	0	0	0	0	0	0
OTU_68156	Eukaryota	Alveolata	Dinophyta	Dinophyceae	Suessiales	Suessiales_X	Woloszynskia	Woloszynskia_sp._strain1	0	0	0	0	0	0	0	0	0	0	0	0	0	1	0	0	0	0	0	0	0	0	0	0	0	0	0	0	0	0	1	0	0	0
OTU_68214	Eukaryota	Alveolata	Dinophyta	Dinophyceae	Suessiales	Suessiales_X	Woloszynskia	Woloszynskia_sp._strain1	0	0	0	0	0	0	0	0	0	0	0	0	0	0	0	0	0	0	0	0	0	0	0	0	0	1	0	0	0	1	0	0	0	0
OTU_68224	Eukaryota	Alveolata	Dinophyta	Dinophyceae	Suessiales	Suessiales_X	Woloszynskia	Woloszynskia_sp._strain1	0	0	0	0	0	0	0	0	0	0	1	0	0	0	0	0	0	0	0	0	0	0	0	0	0	0	0	0	0	0	0	0	0	0
OTU_68248	Eukaryota	Alveolata	Dinophyta	Dinophyceae	Suessiales	Suessiales_X	Woloszynskia	Woloszynskia_sp._strain1	1	0	0	0	0	0	0	0	0	0	0	0	0	0	0	0	0	0	0	0	0	0	0	0	1	0	0	0	0	0	0	0	0	0
OTU_68321	Eukaryota	Alveolata	Dinophyta	Dinophyceae	Suessiales	Suessiales_X	Woloszynskia	Woloszynskia_sp._strain1	0	1	0	0	0	0	0	0	0	0	0	0	0	0	0	0	0	0	0	0	0	0	0	0	0	0	0	0	0	0	0	0	0	0
OTU_68520	Eukaryota	Alveolata	Dinophyta	Dinophyceae	Suessiales	Suessiales_X	Woloszynskia	Woloszynskia_sp._strain1	0	0	1	0	0	0	0	0	0	0	1	0	0	0	0	0	0	0	0	0	0	0	0	0	0	0	0	0	0	0	0	0	0	0
OTU_68859	Eukaryota	Alveolata	Dinophyta	Dinophyceae	Suessiales	Suessiales_X	Woloszynskia	Woloszynskia_sp._strain1	0	0	0	0	0	0	0	0	1	0	0	0	0	0	0	0	0	0	0	0	0	0	0	0	1	0	0	0	0	0	0	0	0	0
OTU_68866	Eukaryota	Alveolata	Dinophyta	Dinophyceae	Suessiales	Suessiales_X	Woloszynskia	Woloszynskia_sp._strain1	0	0	0	0	0	0	0	0	1	0	0	0	0	0	0	0	0	0	0	0	0	0	0	0	0	0	0	0	0	0	1	0	0	0
OTU_69115	Eukaryota	Alveolata	Dinophyta	Dinophyceae	Suessiales	Suessiales_X	Woloszynskia	Woloszynskia_sp._strain1	0	0	0	0	0	0	0	0	0	0	0	0	0	0	0	0	0	0	0	0	0	0	0	0	0	0	0	0	2	0	0	0	0	0
OTU_69392	Eukaryota	Alveolata	Dinophyta	Dinophyceae	Suessiales	Suessiales_X	Woloszynskia	Woloszynskia_sp._strain1	1	0	0	0	0	0	0	0	0	0	0	0	0	0	0	0	0	0	0	0	0	0	0	0	0	0	0	0	0	0	0	0	0	0
OTU_69395	Eukaryota	Alveolata	Dinophyta	Dinophyceae	Suessiales	Suessiales_X	Woloszynskia	Woloszynskia_sp._strain1	0	1	0	0	0	0	0	0	0	0	0	0	0	0	0	0	0	0	0	0	0	0	0	0	0	0	0	0	0	0	0	0	0	0
OTU_69594	Eukaryota	Alveolata	Dinophyta	Dinophyceae	Suessiales	Suessiales_X	Pelagodinium	Multi-affiliation	0	0	0	0	0	0	0	0	0	0	0	0	2	0	0	0	0	0	0	0	0	0	0	0	0	0	0	0	0	0	0	0	0	0
OTU_69772	Eukaryota	Alveolata	Dinophyta	Dinophyceae	Suessiales	Suessiales_X	Woloszynskia	Woloszynskia_sp._strain1	0	0	0	0	0	1	0	0	0	0	0	0	0	0	0	0	0	0	0	0	0	0	0	0	0	0	1	0	0	0	0	0	0	0
OTU_69812	Eukaryota	Alveolata	Dinophyta	Dinophyceae	Suessiales	Suessiales_X	Suessiales_XX	Suessiales_XX_sp.	0	0	0	0	0	0	0	0	0	0	0	0	0	0	0	0	0	0	0	0	0	0	0	0	0	0	0	0	2	0	0	0	0	0
OTU_69824	Eukaryota	Alveolata	Dinophyta	Dinophyceae	Suessiales	Suessiales_X	Suessiales_XX	Suessiales_XX_sp.	0	0	0	0	0	0	0	0	0	0	0	0	0	0	0	0	0	0	0	0	0	0	0	0	0	0	0	0	2	0	0	0	0	0
OTU_69867	Eukaryota	Multi-affiliation	Multi-affiliation	Multi-affiliation	Multi-affiliation	Multi-affiliation	Multi-affiliation	Multi-affiliation	0	0	0	0	0	0	0	2	0	0	0	0	0	0	0	0	0	0	0	0	0	0	0	0	0	0	0	0	0	0	0	0	0	0
OTU_69926	Eukaryota	Alveolata	Dinophyta	Dinophyceae	Suessiales	Suessiales_X	Woloszynskia	Woloszynskia_sp._strain1	0	0	0	0	0	0	0	0	0	2	0	0	0	0	0	0	0	0	0	0	0	0	0	0	0	0	0	0	0	0	0	0	0	0
OTU_70116	Eukaryota	Alveolata	Dinophyta	Dinophyceae	Suessiales	Suessiales_X	Woloszynskia	Woloszynskia_sp._strain1	0	0	0	0	0	0	0	0	0	0	0	0	0	0	0	0	0	0	0	0	0	0	0	0	1	0	0	0	0	0	0	0	0	0
OTU_70124	Eukaryota	Alveolata	Dinophyta	Dinophyceae	Suessiales	Suessiales_X	Woloszynskia	Woloszynskia_sp._strain1	0	0	1	0	0	0	0	0	0	0	0	0	0	0	0	0	0	0	0	0	0	0	0	0	0	1	0	0	0	0	0	0	0	0
OTU_70132	Eukaryota	Alveolata	Dinophyta	Dinophyceae	Suessiales	Suessiales_X	Woloszynskia	Woloszynskia_sp._strain1	1	0	1	0	0	0	0	0	0	0	0	0	0	0	0	0	0	0	0	0	0	0	0	0	0	0	0	0	0	0	0	0	0	0
OTU_70143	Eukaryota	Alveolata	Dinophyta	Dinophyceae	Suessiales	Suessiales_X	Woloszynskia	Woloszynskia_sp._strain1	0	0	0	0	0	0	0	0	0	0	0	0	0	0	0	0	0	0	1	0	0	0	0	0	0	0	0	0	1	0	0	0	0	0
OTU_70346	Eukaryota	Alveolata	Dinophyta	Dinophyceae	Dinophyceae_X	Dinophyceae_XX	Chytriodinium	Chytriodinium_roseum	0	0	0	0	0	0	0	0	0	0	0	0	0	0	0	0	0	0	0	0	0	0	0	0	0	0	0	0	0	0	0	0	0	3
OTU_70564	Eukaryota	Alveolata	Dinophyta	Dinophyceae	Suessiales	Suessiales_X	Woloszynskia	Woloszynskia_sp._strain1	0	0	0	0	0	0	0	0	0	0	0	0	0	0	0	0	0	0	0	0	0	0	0	0	0	1	0	0	0	0	0	0	0	0
OTU_70633	Eukaryota	Alveolata	Dinophyta	Dinophyceae	Suessiales	Suessiales_X	Woloszynskia	Woloszynskia_sp._strain1	0	0	0	0	0	0	0	0	0	0	0	0	0	0	0	0	0	0	0	0	0	3	0	0	0	0	0	0	0	0	0	0	0	0
OTU_70818	Eukaryota	Alveolata	Dinophyta	Dinophyceae	Suessiales	Suessiales_X	Woloszynskia	Woloszynskia_sp._strain1	0	0	0	0	0	1	0	0	0	1	0	0	0	0	0	0	0	0	0	0	0	0	0	0	0	0	0	0	0	0	0	0	0	0
OTU_71131	Eukaryota	Alveolata	Dinophyta	Dinophyceae	Suessiales	Suessiales_X	Woloszynskia	Woloszynskia_sp._strain1	0	0	0	0	0	0	0	1	0	1	0	0	0	0	0	0	0	0	0	0	0	0	0	0	1	0	0	0	0	0	0	0	0	0
OTU_71483	Eukaryota	Alveolata	Dinophyta	Dinophyceae	Dinophyceae_X	Dinophyceae_XX	Dinophyceae_XXX	Dinophyceae_XXX_sp.	0	0	0	0	0	0	0	0	0	0	0	0	0	0	0	0	0	0	0	0	0	0	0	0	0	0	0	2	0	0	0	0	0	0
OTU_71746	Eukaryota	Alveolata	Dinophyta	Dinophyceae	Suessiales	Suessiales_X	Woloszynskia	Woloszynskia_sp._strain1	0	0	0	0	0	0	0	0	0	0	0	0	0	0	0	0	0	0	0	0	0	0	0	0	0	1	0	0	0	0	0	0	0	0
OTU_72044	Eukaryota	Alveolata	Dinophyta	Dinophyceae	Suessiales	Suessiales_X	Woloszynskia	Woloszynskia_sp._strain1	0	0	0	0	0	0	0	0	0	0	0	0	0	0	0	0	0	0	0	0	0	1	0	0	0	0	0	0	0	0	0	0	0	1
OTU_72054	Eukaryota	Alveolata	Dinophyta	Dinophyceae	Suessiales	Suessiales_X	Woloszynskia	Woloszynskia_sp._strain1	1	0	0	1	0	0	0	0	0	0	0	0	0	0	0	0	0	0	0	0	0	0	0	0	0	0	0	0	0	0	0	0	0	0
OTU_72114	Eukaryota	Alveolata	Dinophyta	Dinophyceae	Suessiales	Suessiales_X	Woloszynskia	Woloszynskia_sp._strain1	0	0	0	0	0	0	0	1	0	0	0	0	0	0	0	0	0	0	0	0	0	1	0	0	0	0	0	0	0	0	0	0	0	0
OTU_72141	Eukaryota	Alveolata	Dinophyta	Dinophyceae	Suessiales	Suessiales_X	Woloszynskia	Woloszynskia_sp._strain1	0	0	0	0	0	1	0	0	0	1	0	1	0	0	0	0	0	0	0	0	0	0	0	0	0	0	0	0	0	0	0	0	0	0
OTU_72145	Eukaryota	Alveolata	Dinophyta	Dinophyceae	Suessiales	Suessiales_X	Woloszynskia	Woloszynskia_sp._strain1	0	0	0	0	0	0	0	0	0	0	0	1	0	0	0	0	0	0	0	0	0	0	0	0	0	1	1	0	0	0	0	0	0	0
OTU_72589	Eukaryota	Alveolata	Dinophyta	Dinophyceae	Suessiales	Suessiales_X	Woloszynskia	Woloszynskia_halophila	0	2	0	0	0	0	0	0	0	0	0	0	0	0	0	0	0	0	0	0	0	0	0	0	0	0	0	0	0	0	0	0	0	0
OTU_72895	Eukaryota	Stramenopiles	Stramenopiles_X	MAST	MAST-1	MAST-1C	MAST-1C_X	MAST-1C_X_sp.	0	0	0	0	0	0	0	0	0	0	0	0	0	0	0	0	0	0	0	0	0	0	0	0	0	0	0	0	0	2	0	0	0	0
OTU_73149	Eukaryota	Multi-affiliation	Multi-affiliation	Multi-affiliation	Multi-affiliation	Multi-affiliation	Multi-affiliation	Multi-affiliation	0	0	0	0	0	1	1	0	0	0	0	0	0	0	0	0	0	0	0	0	0	0	0	1	0	1	0	0	0	0	0	0	0	0
OTU_73950	Eukaryota	Alveolata	Dinophyta	Dinophyceae	Suessiales	Suessiales_X	Woloszynskia	Woloszynskia_sp._strain1	0	0	0	0	0	1	0	0	0	0	0	0	0	0	0	0	0	0	0	0	0	1	0	0	0	0	0	0	0	0	0	0	0	0
OTU_74170	Eukaryota	Alveolata	Dinophyta	Dinophyceae	Dinophyceae_X	Dinophyceae_XX	Thecadinium	Thecadinium_dragescoi	0	0	0	0	0	0	0	0	0	0	0	0	0	0	3	0	0	0	0	0	0	0	0	0	0	0	0	0	0	0	0	0	0	0
OTU_75137	Eukaryota	Alveolata	Dinophyta	Dinophyceae	Suessiales	Suessiales_X	Woloszynskia	Woloszynskia_sp._strain1	0	0	0	0	0	2	0	0	0	0	0	0	0	0	0	0	0	0	0	0	0	0	0	0	0	0	0	0	0	0	0	0	0	0
OTU_75381	Eukaryota	Alveolata	Dinophyta	Dinophyceae	Suessiales	Suessiales_X	Woloszynskia	Woloszynskia_sp._strain1	0	1	0	0	0	0	0	0	0	0	0	0	0	0	0	0	0	0	0	0	0	0	0	0	0	0	0	0	0	0	0	1	0	0
OTU_75387	Eukaryota	Alveolata	Dinophyta	Dinophyceae	Suessiales	Suessiales_X	Woloszynskia	Woloszynskia_sp._strain1	0	0	0	0	0	0	0	0	0	0	0	0	0	0	0	0	0	0	0	0	0	0	0	0	0	0	0	0	1	1	0	0	0	0
OTU_75414	Eukaryota	Alveolata	Dinophyta	Dinophyceae	Suessiales	Suessiales_X	Woloszynskia	Woloszynskia_sp._strain1	0	0	0	0	0	0	0	0	0	0	0	0	0	0	0	0	1	0	0	0	0	0	0	0	0	0	0	0	0	0	0	0	0	1
OTU_75651	Eukaryota	Alveolata	Dinophyta	Dinophyceae	Dinophyceae_X	Dinophyceae_XX	Pentapharsodinium	Pentapharsodinium_tyrrhenicum	0	0	0	0	0	0	0	0	0	0	0	0	0	0	2	0	0	0	0	0	0	0	0	0	0	0	0	0	0	0	0	0	0	0
OTU_75885	Eukaryota	Alveolata	Dinophyta	Dinophyceae	Suessiales	Suessiales_X	Woloszynskia	Woloszynskia_sp._strain1	0	0	0	0	0	0	0	0	0	0	0	0	0	0	0	0	0	0	1	0	0	0	0	0	0	0	1	0	0	0	0	0	0	0
OTU_76084	Eukaryota	Alveolata	Dinophyta	Dinophyceae	Suessiales	Suessiales_X	Woloszynskia	Woloszynskia_sp._strain1	0	0	0	0	0	0	0	0	0	0	0	0	0	0	0	0	0	0	0	0	0	0	0	0	0	1	0	0	0	0	0	0	0	0
OTU_76394	Eukaryota	Alveolata	Dinophyta	Dinophyceae	Suessiales	Suessiales_X	Woloszynskia	Woloszynskia_sp._strain1	0	0	0	0	0	0	0	0	0	0	0	0	0	0	0	0	0	0	0	0	0	0	0	0	1	0	0	0	0	0	0	0	0	0
OTU_76429	Eukaryota	Alveolata	Dinophyta	Dinophyceae	Suessiales	Suessiales_X	Woloszynskia	Woloszynskia_sp._strain1	0	0	0	0	0	1	0	0	0	0	0	0	0	0	0	0	0	0	0	0	0	0	0	0	0	0	0	0	0	0	0	0	0	0
OTU_76456	Eukaryota	Alveolata	Dinophyta	Dinophyceae	Suessiales	Suessiales_X	Woloszynskia	Woloszynskia_sp._strain1	0	2	0	0	0	0	0	0	0	0	0	0	0	0	0	0	0	0	0	0	0	0	0	0	0	0	0	0	0	0	0	0	0	0
OTU_76514	Eukaryota	Alveolata	Dinophyta	Dinophyceae	Suessiales	Suessiales_X	Woloszynskia	Woloszynskia_sp._strain1	0	0	0	0	0	0	0	0	0	0	0	0	0	0	0	0	0	0	0	0	0	0	0	0	0	0	0	0	0	0	1	0	0	0
OTU_76565	Eukaryota	Alveolata	Dinophyta	Dinophyceae	Suessiales	Suessiales_X	Woloszynskia	Woloszynskia_sp._strain1	1	0	0	0	0	1	0	0	0	0	0	0	0	0	0	0	0	0	0	0	0	0	0	0	0	0	0	0	0	0	0	0	0	0
OTU_76595	Eukaryota	Alveolata	Dinophyta	Dinophyceae	Suessiales	Suessiales_X	Woloszynskia	Woloszynskia_sp._strain1	0	0	0	0	0	1	0	0	0	0	0	0	0	0	0	0	0	0	0	0	0	0	0	0	0	0	0	0	0	0	0	1	0	0
OTU_76746	Eukaryota	Alveolata	Dinophyta	Dinophyceae	Suessiales	Suessiales_X	Woloszynskia	Woloszynskia_sp._strain1	0	0	0	0	0	0	0	0	0	1	1	0	0	0	0	0	0	0	0	0	0	0	0	0	0	0	0	0	0	0	0	0	0	0
OTU_76791	Eukaryota	Alveolata	Dinophyta	Dinophyceae	Suessiales	Suessiales_X	Woloszynskia	Woloszynskia_sp._strain1	0	0	0	0	0	0	0	0	0	0	0	0	0	0	0	0	1	0	0	0	0	0	0	0	0	0	0	0	0	0	0	0	0	0
OTU_76915	Eukaryota	Alveolata	Dinophyta	Dinophyceae	Suessiales	Suessiales_X	Woloszynskia	Woloszynskia_sp._strain1	0	0	0	0	0	1	0	0	0	0	0	0	0	0	0	0	0	0	0	0	0	0	0	0	0	1	0	0	0	0	0	0	0	0
OTU_76960	Eukaryota	Alveolata	Dinophyta	Dinophyceae	Suessiales	Suessiales_X	Woloszynskia	Woloszynskia_sp._strain1	1	0	0	0	0	0	0	0	0	0	0	0	0	0	0	0	0	0	0	0	0	0	0	0	1	0	0	0	0	0	0	0	0	0
OTU_77089	Eukaryota	Alveolata	Dinophyta	Dinophyceae	Suessiales	Suessiales_X	Woloszynskia	Woloszynskia_sp._strain1	0	0	0	0	0	1	0	0	2	0	0	0	0	0	0	0	0	0	0	0	0	0	0	0	0	0	0	0	0	0	0	0	0	0
OTU_77090	Eukaryota	Alveolata	Dinophyta	Dinophyceae	Suessiales	Suessiales_X	Woloszynskia	Woloszynskia_sp._strain1	0	0	0	0	0	0	0	0	0	0	0	0	0	0	0	0	0	0	0	1	0	0	0	0	0	0	0	0	0	0	0	0	1	0
OTU_77190	Eukaryota	Alveolata	Dinophyta	Dinophyceae	Suessiales	Suessiales_X	Woloszynskia	Woloszynskia_sp._strain1	0	0	0	0	0	2	0	0	0	0	0	0	0	0	0	0	0	0	0	0	0	0	0	0	0	0	0	0	0	0	0	0	0	0
OTU_77685	Eukaryota	Alveolata	Dinophyta	Dinophyceae	Suessiales	Suessiales_X	Woloszynskia	Woloszynskia_sp._strain1	0	0	0	0	0	0	0	0	0	1	0	0	0	1	0	0	1	0	0	0	0	0	0	0	0	0	0	0	0	0	0	0	0	0
OTU_77694	Eukaryota	Alveolata	Dinophyta	Dinophyceae	Suessiales	Suessiales_X	Woloszynskia	Woloszynskia_sp._strain1	0	0	0	0	0	1	0	0	1	0	0	0	0	0	0	0	0	0	0	0	0	1	0	0	0	0	0	0	0	0	0	0	0	0
OTU_77730	Eukaryota	Alveolata	Dinophyta	Dinophyceae	Suessiales	Suessiales_X	Woloszynskia	Woloszynskia_sp._strain1	0	0	1	0	0	0	0	0	0	0	0	0	1	0	0	0	0	0	0	0	0	0	0	0	0	0	0	0	0	0	0	0	0	0
OTU_77741	Eukaryota	Alveolata	Dinophyta	Dinophyceae	Suessiales	Suessiales_X	Woloszynskia	Woloszynskia_sp._strain1	0	0	0	0	0	1	0	0	0	0	0	0	0	0	0	0	0	0	0	0	0	0	0	0	0	0	0	0	0	0	0	0	0	0
OTU_77828	Eukaryota	Alveolata	Dinophyta	Dinophyceae	Suessiales	Suessiales_X	Woloszynskia	Woloszynskia_sp._strain1	0	0	0	0	0	0	0	0	0	0	0	0	0	0	0	0	0	0	0	0	0	0	0	0	0	1	0	1	0	0	0	0	0	0
OTU_78008	Eukaryota	Alveolata	Dinophyta	Dinophyceae	Suessiales	Suessiales_X	Woloszynskia	Woloszynskia_sp._strain1	0	0	0	0	0	1	0	0	0	0	0	0	0	0	0	0	0	0	0	0	0	0	0	0	0	0	0	0	0	0	0	0	0	0
OTU_78019	Eukaryota	Alveolata	Dinophyta	Dinophyceae	Suessiales	Suessiales_X	Woloszynskia	Woloszynskia_sp._strain1	0	0	0	0	0	0	0	0	0	0	0	1	0	0	0	0	0	0	0	0	0	0	0	0	0	1	0	0	0	0	0	0	0	0
OTU_78060	Eukaryota	Alveolata	Dinophyta	Dinophyceae	Suessiales	Suessiales_X	Woloszynskia	Woloszynskia_sp._strain1	0	0	0	0	0	1	0	0	0	0	0	0	0	0	0	0	0	0	0	0	0	1	0	0	0	0	0	0	0	0	0	0	0	0
OTU_78147	Eukaryota	Alveolata	Dinophyta	Dinophyceae	Dinophyceae_X	Dinophyceae_XX	Gymnodinium	Gymnodinium_dorsalisulcum	0	0	0	0	0	0	0	1	0	0	0	0	0	0	0	0	0	0	0	0	0	0	0	0	0	0	0	0	1	0	0	0	0	0
OTU_78781	Eukaryota	Alveolata	Dinophyta	Dinophyceae	Suessiales	Suessiales_X	Woloszynskia	Woloszynskia_sp._strain1	0	1	0	0	0	0	0	0	0	0	0	0	0	0	0	0	0	0	0	0	0	0	0	0	0	0	0	0	0	0	1	0	0	0
OTU_78802	Eukaryota	Alveolata	Dinophyta	Dinophyceae	Suessiales	Suessiales_X	Woloszynskia	Woloszynskia_sp._strain1	0	0	0	0	0	0	0	0	0	0	0	0	0	0	0	0	0	0	0	0	0	0	0	0	0	0	0	0	0	0	0	0	1	0
OTU_79327	Eukaryota	Alveolata	Dinophyta	Dinophyceae	Suessiales	Suessiales_X	Woloszynskia	Woloszynskia_sp._strain1	0	0	0	0	0	0	0	0	0	0	0	0	0	0	0	0	1	0	0	0	1	0	0	0	0	0	0	0	0	0	0	0	0	0
OTU_79332	Eukaryota	Alveolata	Dinophyta	Dinophyceae	Dinophyceae_X	Dinophyceae_XX	Dinophyceae_XXX	Dinophyceae_XXX_sp.	0	0	0	0	0	2	0	0	0	0	0	0	0	0	0	0	0	0	0	0	0	0	0	0	0	0	0	0	0	0	0	0	0	0
OTU_80096	Eukaryota	Alveolata	Dinophyta	Dinophyceae	Suessiales	Suessiales_X	Woloszynskia	Woloszynskia_sp._strain1	0	1	0	0	0	0	0	0	1	0	0	0	0	0	0	0	0	0	0	0	0	0	0	0	0	0	0	0	0	0	0	0	0	0
OTU_80199	Eukaryota	Alveolata	Dinophyta	Dinophyceae	Dinophyceae_X	Dinophyceae_XX	Gymnodinium	Gymnodinium_dorsalisulcum	0	0	0	0	0	0	0	0	0	0	0	0	0	0	0	0	0	0	0	1	0	0	0	0	0	0	0	0	0	0	0	1	0	0
OTU_80299	Eukaryota	Alveolata	Dinophyta	Dinophyceae	Suessiales	Suessiales_X	Woloszynskia	Woloszynskia_sp._strain1	0	0	0	1	0	0	0	0	0	0	1	0	0	0	0	0	0	0	0	0	0	0	0	0	0	0	0	0	0	0	0	0	0	0
OTU_80517	Eukaryota	Alveolata	Dinophyta	Dinophyceae	Dinophyceae_X	Dinophyceae_XX	Prorocentrum	Prorocentrum_micans	0	0	0	0	0	0	0	0	0	0	0	0	0	0	0	0	0	0	0	0	0	0	0	0	0	0	0	0	0	0	2	0	0	0
OTU_80555	Eukaryota	Alveolata	Dinophyta	Syndiniales	Dino-Group-I	Dino-Group-I-Clade-1	Dino-Group-I-Clade-1_X	Multi-affiliation	0	0	0	0	0	0	0	0	0	0	0	0	0	0	0	0	0	0	0	0	0	0	0	0	0	0	0	0	0	1	0	0	0	0
OTU_80646	Eukaryota	Alveolata	Dinophyta	Syndiniales	Dino-Group-I	Dino-Group-I-Clade-1	Dino-Group-I-Clade-1_X	Dino-Group-I-Clade-1_X_sp	0	0	0	0	0	2	0	0	0	0	0	0	0	0	0	0	0	0	0	0	0	0	0	0	0	0	0	0	0	0	0	0	0	0
OTU_80788	Eukaryota	Opisthokonta	Mesomycetozoa	Filasterea	Ministerida	Ministeridae	Ministeria	Ministeria_vibrans	0	0	0	0	1	0	0	0	0	0	0	0	0	0	0	0	0	0	0	0	0	0	1	0	0	0	0	0	0	0	0	0	0	0
OTU_82381	Eukaryota	Alveolata	Dinophyta	Dinophyceae	Dinophyceae_X	Dinophyceae_XX	Thecate	Thecate_sp.	2	0	0	0	0	0	0	0	0	0	0	0	0	0	0	0	0	0	0	0	0	0	0	0	0	0	0	0	0	0	0	0	0	0
OTU_82600	Eukaryota	Multi-affiliation	Multi-affiliation	Multi-affiliation	Multi-affiliation	Multi-affiliation	Multi-affiliation	Multi-affiliation	0	0	0	0	0	0	0	0	1	0	0	0	0	0	0	0	0	0	0	0	0	0	0	0	0	0	0	0	0	0	0	0	0	0
OTU_83049	Eukaryota	Stramenopiles	Ochrophyta	Bacillariophyta	Bacillariophyta_X	Polar-centric-Mediophyceae	Cyclotella	Multi-affiliation	0	0	0	0	0	0	0	0	0	0	0	0	0	0	0	0	0	0	0	0	0	0	0	0	2	0	0	0	0	0	0	0	0	0
OTU_83240	Eukaryota	Stramenopiles	Ochrophyta	Bacillariophyta	Bacillariophyta_X	Polar-centric-Mediophyceae	Cyclotella	Multi-affiliation	0	0	0	0	0	0	0	0	0	0	0	0	0	0	0	0	1	0	1	0	0	0	0	0	0	0	0	0	0	0	0	0	0	0
OTU_83426	Eukaryota	Stramenopiles	Ochrophyta	Bacillariophyta	Bacillariophyta_X	Polar-centric-Mediophyceae	Cyclotella	Multi-affiliation	0	0	0	0	0	0	0	0	0	1	0	0	0	0	0	0	0	0	0	0	0	0	0	0	1	0	0	0	0	0	0	0	0	0
OTU_83546	Eukaryota	Stramenopiles	Ochrophyta	Bacillariophyta	Bacillariophyta_X	Polar-centric-Mediophyceae	Cyclotella	Multi-affiliation	0	0	0	0	0	0	0	0	0	1	0	0	0	0	0	0	0	0	0	0	0	0	0	1	0	0	0	0	0	0	0	0	0	0
OTU_83837	Eukaryota	Stramenopiles	Ochrophyta	Bacillariophyta	Bacillariophyta_X	Polar-centric-Mediophyceae	Cyclotella	Multi-affiliation	0	0	0	0	0	0	0	0	0	0	0	0	0	0	0	0	0	2	0	0	0	0	0	0	0	0	0	0	0	0	0	0	0	0
OTU_84508	Eukaryota	Alveolata	Dinophyta	Dinophyceae	Suessiales	Suessiales_X	Woloszynskia	Woloszynskia_sp._strain1	0	0	0	0	0	0	0	0	0	0	1	0	0	0	0	0	0	0	0	0	0	0	0	0	0	0	0	0	0	1	0	0	0	0
OTU_84585	Eukaryota	Stramenopiles	Ochrophyta	Bacillariophyta	Bacillariophyta_X	Raphid-pennate	Pleurosigma	Pleurosigma_intermedium	0	0	0	0	0	0	0	0	0	0	0	0	0	0	0	0	0	0	0	0	0	0	0	0	2	0	0	0	0	0	0	0	0	0
OTU_84858	Eukaryota	Stramenopiles	Ochrophyta	Bacillariophyta	Bacillariophyta_X	Polar-centric-Mediophyceae	Multi-affiliation	Multi-affiliation	0	0	0	0	0	0	0	0	0	0	0	0	0	0	1	0	0	0	0	0	0	0	0	0	1	0	0	0	0	0	0	0	0	0
OTU_84911	Eukaryota	Stramenopiles	Ochrophyta	Bacillariophyta	Bacillariophyta_X	Polar-centric-Mediophyceae	Thalassiosira	Multi-affiliation	0	0	0	0	0	0	0	0	0	0	0	0	0	0	0	0	0	0	0	0	0	0	0	1	0	0	0	0	0	0	0	0	0	0
OTU_84932	Eukaryota	Stramenopiles	Ochrophyta	Bacillariophyta	Bacillariophyta_X	Polar-centric-Mediophyceae	Multi-affiliation	Multi-affiliation	0	0	0	0	0	0	0	0	0	0	0	0	0	0	2	0	0	0	0	0	0	0	0	0	0	0	0	0	0	0	0	0	0	0
OTU_85134	Eukaryota	Stramenopiles	Ochrophyta	Bacillariophyta	Bacillariophyta_X	Polar-centric-Mediophyceae	Multi-affiliation	Multi-affiliation	0	0	0	0	0	0	0	0	0	0	0	0	0	0	0	1	0	0	0	0	0	0	0	0	0	0	0	0	0	0	0	0	0	0
OTU_85298	Eukaryota	Stramenopiles	Ochrophyta	Bacillariophyta	Bacillariophyta_X	Polar-centric-Mediophyceae	Multi-affiliation	Multi-affiliation	0	0	0	0	0	0	0	0	0	0	0	0	0	0	0	0	0	0	0	0	0	0	0	2	0	0	0	0	0	0	0	0	0	0
OTU_85417	Eukaryota	Stramenopiles	Ochrophyta	Bacillariophyta	Bacillariophyta_X	Polar-centric-Mediophyceae	Multi-affiliation	Multi-affiliation	0	0	0	0	0	0	0	0	0	0	0	0	0	0	0	0	0	0	0	0	0	0	0	1	0	0	0	0	0	0	0	0	0	0
OTU_85606	Eukaryota	Stramenopiles	Ochrophyta	Bacillariophyta	Bacillariophyta_X	Polar-centric-Mediophyceae	Thalassiosira	Thalassiosira_sp.	0	0	0	0	0	0	0	0	0	0	0	0	0	0	0	0	0	0	0	0	0	0	0	2	0	0	0	0	0	0	0	0	0	0
OTU_88591	Eukaryota	Alveolata	Dinophyta	Dinophyceae	Dinophyceae_X	Pfiesteriaceae	Pfiesteriaceae_X	Pfiesteriaceae_X_sp.	0	0	0	0	0	0	0	0	0	0	0	0	2	0	0	0	0	0	0	0	0	0	0	0	0	0	0	0	0	0	0	0	0	0
OTU_88999	Eukaryota	Alveolata	Dinophyta	Dinophyceae	Dinophyceae_X	Pfiesteriaceae	Multi-affiliation	Multi-affiliation	0	0	2	0	0	0	0	0	0	0	0	0	0	0	0	0	0	0	0	0	0	0	0	0	0	0	0	0	0	0	0	0	0	0
OTU_229095	Eukaryota	Rhizaria	Cercozoa	Filosa-Thecofilosea	Filosa-Thecofilosea_X	Filosa-Thecofilosea_XX	Filosa-Thecofilosea_XXX	Filosa-Thecofilosea_XXX_sp.	0	0	0	0	0	0	0	0	0	0	0	0	0	0	0	0	0	0	0	0	0	2	0	0	0	0	0	0	0	0	0	0	0	0
OTU_247096	Eukaryota	Rhizaria	Cercozoa	Filosa-Imbricatea	Marimonadida	Marimonadida_X	Marimonadida_XX	Marimonadida_XX_sp.	0	0	0	0	0	0	0	0	0	0	0	0	0	0	0	0	0	0	0	0	0	0	0	1	0	0	0	0	0	0	0	0	0	0
OTU_247377	Eukaryota	Stramenopiles	Stramenopiles_X	Oomycota	Oomycota_X	Peronosporales	Peronosporales_X	Peronosporales_X_sp.	0	0	0	0	0	0	0	0	0	0	0	0	0	0	0	0	0	0	2	0	0	0	0	0	0	0	0	0	0	0	0	0	0	0
OTU_252003	Eukaryota	Stramenopiles	Ochrophyta	Phaeophyceae	Phaeophyceae_X	Phaeophyceae_XX	Sphacelaria	Sphacelaria_sp.	0	0	0	0	0	0	0	0	0	0	0	0	0	0	0	2	0	0	0	0	0	0	0	0	0	0	0	0	0	0	0	0	0	0
OTU_299171	Eukaryota	Stramenopiles	Stramenopiles_X	Bicoecea	Anoecales	Caecitellaceae	Caecitellus	Caecitellus_parvulus	0	0	0	0	0	0	0	0	0	0	0	0	0	0	0	0	2	0	0	0	0	0	0	0	0	0	0	0	0	0	0	0	0	0
OTU_299297	Eukaryota	Stramenopiles	Stramenopiles_X	Bicoecea	Anoecales	Caecitellaceae	Caecitellus	Caecitellus_parvulus	0	0	0	0	0	0	0	0	0	0	0	0	0	0	0	0	0	0	0	2	0	0	0	0	0	0	0	0	0	0	0	0	0	0
OTU_299346	Eukaryota	Stramenopiles	Stramenopiles_X	Bicoecea	Anoecales	Caecitellaceae	Caecitellus	Caecitellus_parvulus	0	0	0	0	0	0	0	0	0	0	0	0	1	0	0	0	0	0	0	0	0	0	0	0	0	0	0	0	0	0	0	0	0	0
OTU_299481	Eukaryota	Rhizaria	Cercozoa	Endomyxa-Phytomyxea	Phagomyxida	Phagomyxidae	Phagomixa	Phagomixa_sp._strain1	0	2	0	0	0	0	0	0	0	0	0	0	0	0	0	0	0	0	0	0	0	0	0	0	0	0	0	0	0	0	0	0	0	0
OTU_299702	Eukaryota	Hacrobia	Centroheliozoa	Centroheliozoa_X	Centroheliozoa_XX	Centroheliozoa_XXX	Centroheliozoa_XXXX	Centroheliozoa_XXXX_sp.	0	0	0	0	0	0	0	0	0	0	0	0	0	0	0	0	0	0	0	0	0	0	2	0	0	0	0	0	0	0	0	0	0	0
