# Supplementary material for: Unveiling protist diversity associated with the Pacific oyster Crassostrea gigas using blocking and excluding primers
Source: BMC Microbiol. 2020 Jul 3;20:193. doi: 10.1186/s12866-020-01860-1 (PMC7333408; doi:10.1186/s12866-020-01860-1)
Supplement: Supplementary file 8 — Additional file 8: Table S5. Metadata and alpha diversity indices. Alpha diversity values correspond to 18SV1V2EX/18SV4BP. NA: not analysed (protist sequences< 5160). [file 12866_2020_1860_MOESM8_ESM.xls]

## Sheet: Table S5
Table S5. Metadata and alpha diversity indices. Alpha diversity indice values correspond to 18SV1V2EX/18SV4BP. NA: not analysed (protist sequences<5160).
						Alpha diversity indices
Code	Other name	Sampling	Site	Oyster family	Origin	Observed	Chao1	Evenness	Shannon
O1.S1.R01	CF09-C-R05	1	Hatchery (April 2016)	O1	Atlantic Ocean	65/86	95.00000/111.20000	0.50592/0.39333	2.11189/1.75202
O1.S1.R02	CF09-C-R07	1	Hatchery (April 2016)	O1	Atlantic Ocean	NA	NA	NA	NA
O1.S1.R03	CF09-C-R08	1	Hatchery (April 2016)	O1	Atlantic Ocean	NA	NA	NA	NA
O1.S1.R04	CF09-C-R10	1	Hatchery (April 2016)	O1	Atlantic Ocean	46/76	70.42857/99.00000	0.41330/0.42490	1.58237/1.84014
O1.S1.R05	CF09-C-R11	1	Hatchery (April 2016)	O1	Atlantic Ocean	49/83	119.00000/104.00000	0.39679/0.48629	1.54422/2.14882
O1.S1.R06	CF09-C-R13	1	Hatchery (April 2016)	O1	Atlantic Ocean	NA	NA	NA	NA
O1.S2.R01	AF09-N-R06	2	Atl. Ocean (April 2016)	O1	Atlantic Ocean	NA	NA	NA	NA
O1.S2.R02	AF09-N-R10	2	Atl. Ocean (April 2016)	O1	Atlantic Ocean	91/118	154.00000/155.27273	0.56763/0.29128	2.56048/1.38963
O1.S2.R03	AF09-N-R12	2	Atl. Ocean (April 2016)	O1	Atlantic Ocean	NA	NA	NA	NA
O1.S3.R01	AF09-I-R02	3	Atl. Ocean (July 2016)	O1	Atlantic Ocean	NA	NA	NA	NA
O1.S3.R02	AF09-I-R10	3	Atl. Ocean (July 2016)	O1	Atlantic Ocean	NA	NA	NA	NA
O1.S3.R03	AF09-I-R13	3	Atl. Ocean (July 2016)	O1	Atlantic Ocean	NA	NA	NA	NA
O2.S1.R01	CF15-C-R06	1	Hatchery (April 2016)	O2	Atlantic Ocean	NA	NA	NA	NA
O2.S1.R02	CF15-C-R08	1	Hatchery (April 2016)	O2	Atlantic Ocean	59/82	113.16667/98.66667	0.39921/0.31426	1.62780/1.38485
O2.S1.R03	CF15-C-R09	1	Hatchery (April 2016)	O2	Atlantic Ocean	NA	NA	NA	NA
O2.S1.R04	CF15-C-R14	1	Hatchery (April 2016)	O2	Atlantic Ocean	47/78	78.66667/113.10000	0.41838/0.46185	1.61082/2.01213
O2.S2.R01	AF15-N-R05	2	Atl. Ocean (April 2016)	O2	Atlantic Ocean	NA	NA	NA	NA
O2.S2.R02	AF15-N-R06	2	Atl. Ocean (April 2016)	O2	Atlantic Ocean	58/83	100.75000/128.76923	0.36440/0.22386	1.47963/0.98922
O2.S2.R03	AF15-N-R09	2	Atl. Ocean (April 2016)	O2	Atlantic Ocean	46/78	59.20000/80.11765	0.35102/0.53017	1.34394/2.30977
O2.S3.R01	AF15-I-R01	3	Atl. Ocean (July 2016)	O2	Atlantic Ocean	74/87	95.11111/98.00000	0.64548/0.61556	2.77820/2.74903
O2.S3.R02	AF15-I-R09	3	Atl. Ocean (July 2016)	O2	Atlantic Ocean	NA	NA	NA	NA
O2.S3.R03	AF15-I-R10	3	Atl. Ocean (July 2016)	O2	Atlantic Ocean	NA	NA	NA	NA
O3.S1.R01	CF21-C-R03	1	Hatchery (April 2016)	O3	Mass selection	41/71	76.00000/79.27273	0.55050/0.47825	2.04431/2.03864
O3.S1.R02	CF21-C-R08	1	Hatchery (April 2016)	O3	Mass selection	73/103	112.00000/130.39130	0.53930/0.45708	2.31386/2.11842
O3.S1.R03	CF21-C-R13	1	Hatchery (April 2016)	O3	Mass selection	NA	NA	NA	NA
O3.S1.R04	CF21-C-R14	1	Hatchery (April 2016)	O3	Mass selection	42/66	82.00000/76.50000	0.38895/0.48833	1.45375/2.04595
O3.S2.R01	AF21-N-R06	2	Atl. Ocean (April 2016)	O3	Mass selection	60/87	95.00000/108.66667	0.50080/0.34292	2.05047/1.53144
O3.S2.R02	AF21-N-R14	2	Atl. Ocean (April 2016)	O3	Mass selection	67/70	101.50000/91.00000	0.40005/0.28659	1.68207/1.21756
O3.S3.R01	AF21-I-R03	3	Atl. Ocean (July 2016)	O3	Mass selection	NA	NA	NA	NA
O3.S3.R02	AF21-I-R09	3	Atl. Ocean (July 2016)	O3	Mass selection	NA	NA	NA	NA
O4.S1.R01	CF32-C-R02	1	Hatchery (April 2016)	O4	Mediterranean Sea	NA	NA	NA	NA
O4.S1.R02	CF32-C-R07	1	Hatchery (April 2016)	O4	Mediterranean Sea	50/67	80.60000/71.58333	0.48400/0.49085	1.89342/2.06385
O4.S1.R03	CF32-C-R08	1	Hatchery (April 2016)	O4	Mediterranean Sea	NA	NA	NA	NA
O4.S1.R04	CF32-C-R11	1	Hatchery (April 2016)	O4	Mediterranean Sea	71/89	110.54545/112.40000	0.54939/0.45192	2.34186/2.02852
O4.S1.R05	CF32-C-R14	1	Hatchery (April 2016)	O4	Mediterranean Sea	80/98	109.25000/122.47368	0.47123/0.38323	2.06493/1.75712
O4.S2.R01	AF32-N-R04	2	Atl. Ocean (April 2016)	O4	Mediterranean Sea	56/90	106.60000/100.55556	0.33764/0.36170	1.35913/1.62758
O4.S2.R02	AF32-N-R05	2	Atl. Ocean (April 2016)	O4	Mediterranean Sea	69/87	100.62500/100.15385	0.43255/0.50908	1.83145/2.27352
O4.S2.R03	AF32-N-R07	2	Atl. Ocean (April 2016)	O4	Mediterranean Sea	56/76	78.66667/99.10000	0.31287/0.39925	1.25943/1.72904
O4.S3.R01	AF32-I-R06	3	Atl. Ocean (July 2016)	O4	Mediterranean Sea	87/120	99.21429/132.15789	0.50135/0.58873	2.23899/2.81856
O4.S3.R02	AF32-I-R07	3	Atl. Ocean (July 2016)	O4	Mediterranean Sea	75/87	165.00000/90.90000	0.39592/0.55108	1.70939/2.46108
O4.S3.R03	AF32-I-R14	3	Atl. Ocean (July 2016)	O4	Mediterranean Sea	NA	NA	NA	NA
O5.S1.R01	CF44-C-R03	1	Hatchery (April 2016)	O5	Mediterranean Sea	55/82	68.60000/90.57143	0.56675/0.52301	2.27115/2.30477
O5.S1.R02	CF44-C-R05	1	Hatchery (April 2016)	O5	Mediterranean Sea	92/112	117.00000/147.00000	0.62551/0.52645	2.82841/2.48404
O5.S1.R03	CF44-C-R06	1	Hatchery (April 2016)	O5	Mediterranean Sea	59/96	82.75000/135.66667	0.49072/0.44479	2.00092/2.03016
O5.S1.R04	CF44-C-R07	1	Hatchery (April 2016)	O5	Mediterranean Sea	58/85	92.20000/105.31250	0.40459/0.42525	1.64281/1.88926
O5.S1.R05	CF44-C-R08	1	Hatchery (April 2016)	O5	Mediterranean Sea	75/85	96.37500/95.46154	0.55410/0.51061	2.39231/2.26848
O5.S1.R06	CF44-C-R09	1	Hatchery (April 2016)	O5	Mediterranean Sea	69/82	127.50000/99.76923	0.48163/0.40312	2.03929/1.77644
O5.S1.R07	CF44-C-R11	1	Hatchery (April 2016)	O5	Mediterranean Sea	58/84	152.50000/103.46154	0.52825/0.50531	2.14493/2.23892
O5.S2.R01	AF44-N-R05	2	Atl. Ocean (April 2016)	O5	Mediterranean Sea	81/92	108.27273/125.00000	0.54990/0.26627	2.41651/1.20402
O5.S2.R02	AF44-N-R07	2	Atl. Ocean (April 2016)	O5	Mediterranean Sea	82/82	144.14286/208.00000	0.41887/0.26466	1.84586/1.16630
O5.S2.R03	AF44-N-R10	2	Atl. Ocean (April 2016)	O5	Mediterranean Sea	59/67	94.00000/72.20000	0.45121/0.28770	1.83983/1.20968
O5.S3.R01	AF44-I-R05	3	Atl. Ocean (July 2016)	O5	Mediterranean Sea	95/116	132.50000/119.88235	0.62578/0.65999	2.84973/3.13731
O5.S3.R02	AF44-I-R11	3	Atl. Ocean (July 2016)	O5	Mediterranean Sea	NA	NA	NA	NA
O5.S3.R03	AF44-I-R12	3	Atl. Ocean (July 2016)	O5	Mediterranean Sea	86/140	116.66667/177.62500	0.47839/0.57194	2.13090/2.82631
